# Supplementary material
Source: PubMed Central journal article supplement (PMC5330731)
Supplement: jci-127-87583-s001.pdf [file jci-127-87583-s001.pdf]

## SUPPLEMENTAL METHODS

**Deletion of  $3a^{1KI/1KI}$  in tumors.** *Mx1-cre* (1) was utilized to delete the knockin alleles of *E2f1* in adult mice bearing liver tumors. Livers from twelve and a half-month-old *Mx1-cre 3a^{1KI/1KI}* mice were imaged by magnetic resonance imaging (MRI; 11.7 T system, Bruker BioSpin). Mice were then given intraperitoneal injections with poly I-C (Sigma; 10  $\mu$ g per g of body weight, dissolved in PBS) at 1, 3, 5, 7 and 9 days following the initial MRI. Tumor mice were re-imaged by MRI 24-38 days following the initial MRI. Deletion of the knockin alleles was confirmed by southern blot. Tumor volume was calculated by measuring and summing the tumor area on each MRI section, using ImagJ. The fold growth represents the average of the volume calculated from the axial and coronal views of liver images.

## SUPPLEMENTAL REFERENCE

1. Kühn R, Schwenk F, Aguet M, Rajewsky K. Inducible gene targeting in mice. *Science* 1995;269(5229):1427–1429.

## Supplemental Figure 1

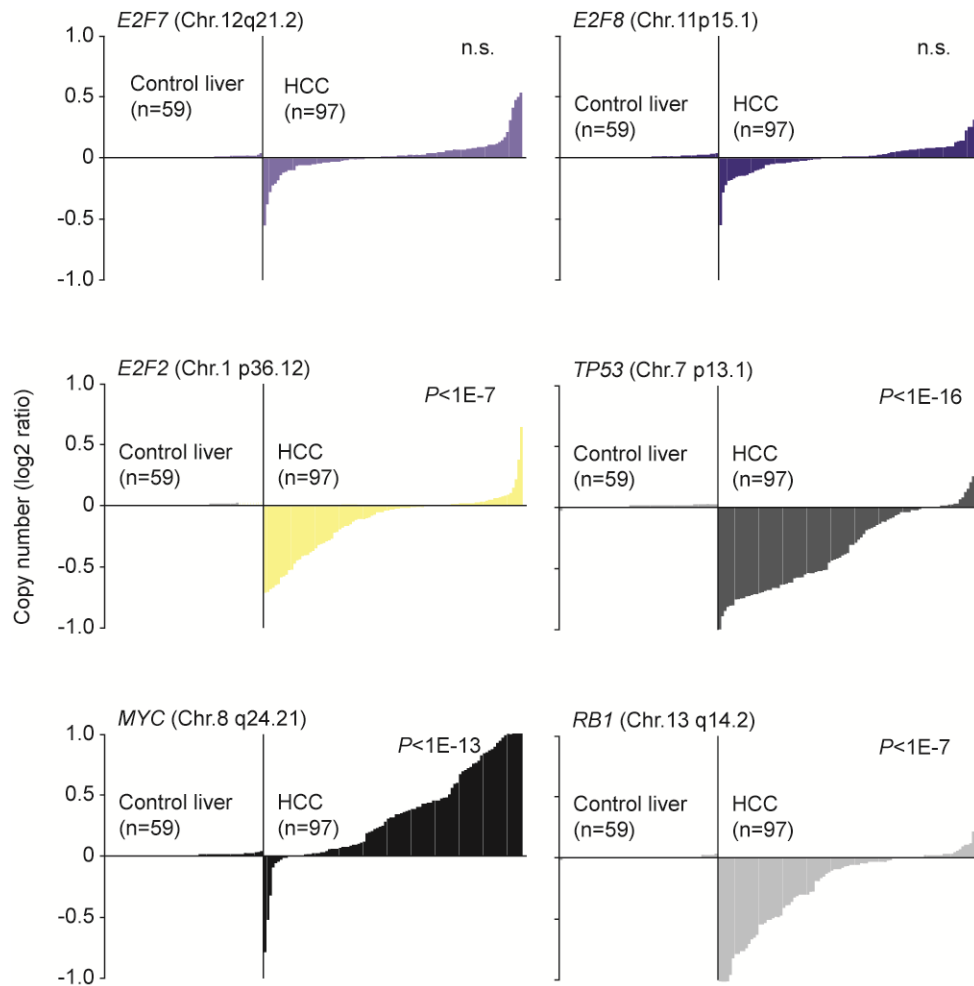

Alternate view of the box plots illustrating copy number variations in E2F pathway genes in normal and HCC liver samples using the TCGA database, from Figure 1A. Levels of copy number variations are shown on the Y-axis and individual patients on the X-axis. Significance determined by two-sided Student's *t*-test vs. control liver. n.s., not significant.

## Supplemental Figure 2

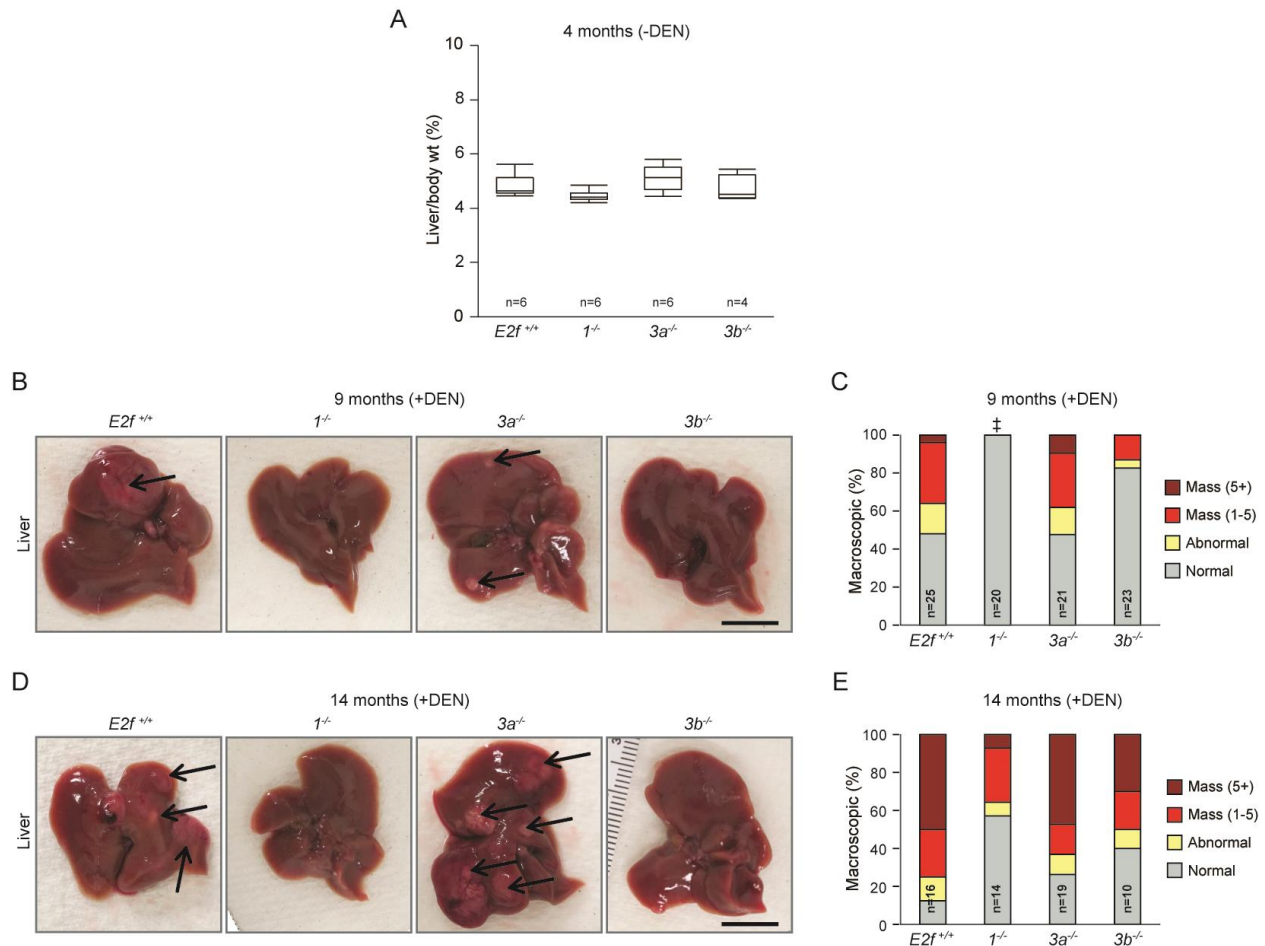

(A) Box plots showing the ratio of liver vs. body weight of 4-month-old wild type ( $E2f^{+/+}$ ) and  $E2f$  knockout male mice. The center lines in the boxes represent the median value. The upper and lower boxes represent the 1<sup>st</sup> and 3<sup>rd</sup> quartile and the whiskers represent the highest and lowest value.

(B) Representative pictures of livers from 9-month-old DEN treated  $E2f^{+/+}$  and  $E2f$  knockout male mice. Arrows indicate masses. Scale bars, 1 cm.

(C) Macroscopic evaluation of livers from B. Fisher's exact tests with Bonferroni correction for multiple tests comparing livers with mass vs. livers without masses. ‡,  $P=0.007$  vs.  $E2f$

(D) Representative pictures of livers from 14-month-old DEN treated  $E2f^{+/+}$  and  $E2f$  knockout male mice. Arrows indicate masses. Scale bars, 1 cm.

(E) Macroscopic evaluation of livers from D. n, number of mice.

## Supplemental Figure 3

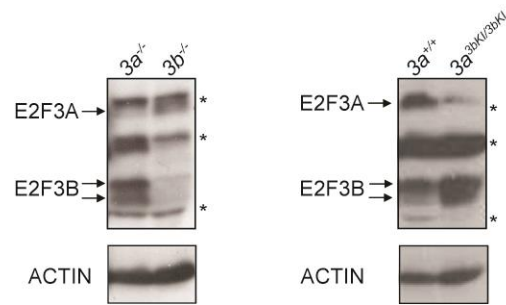

Immunoblot showing expected band sizes for E2F3A and E2F3B (left) or elevated E2F3B expression in livers from 1-month-old wild-type ( $3a^{+/+}$ )  $3a^{3bKI/3bKI}$  mice (right). Antibodies against E2F3 were used and bands for E2F3A and E2F3B are indicated with arrows. Nonspecific bands are noted with asterisks. ACTIN or TUBULIN are included as loading controls.

Supplemental Figure 4

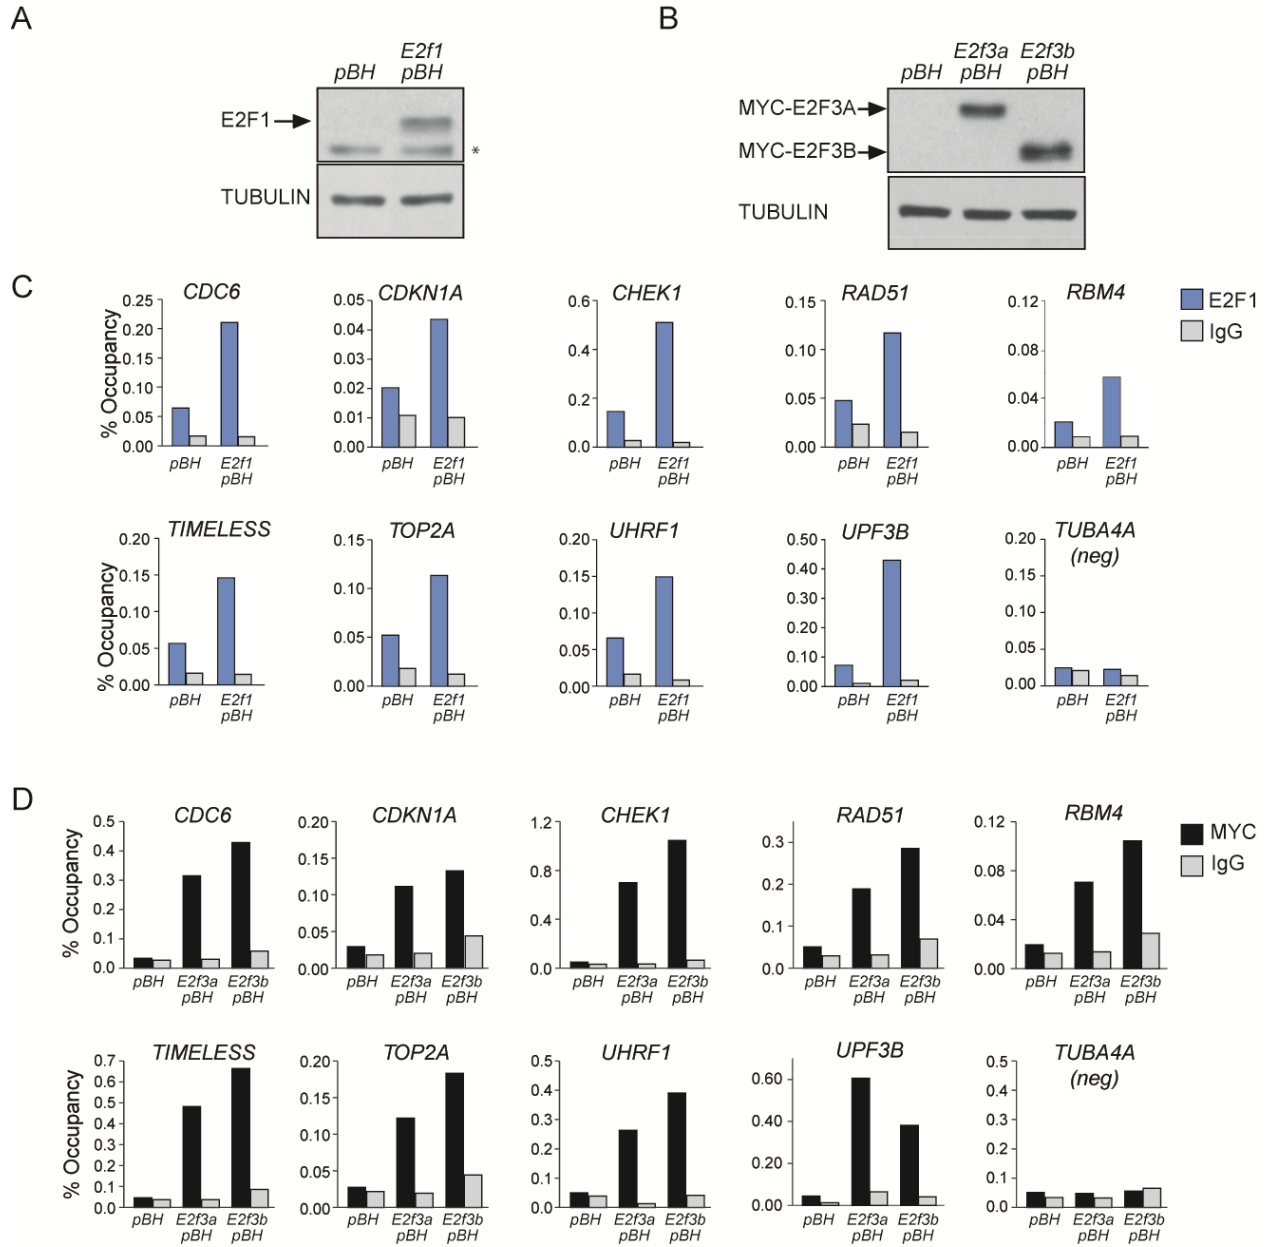

#### **Supplemental Figure 4**

- (A) Immunoblot of whole cell extracts from HepG2 cells transduced with the retroviral expression plasmid pBABE-Hygro (pBH) or E2F1 pBH. Antibodies against E2F1 were used to detect the overexpressed protein and TUBULIN was used as a loading control. Nonspecific or endogenous E2F1 band is marked with an asterisk.
- (B) Immunoblot of whole cell extracts from HepG2 cells transduced with pBH, E2F3A pBH or E2F3B pBH. Antibodies against the MYC-epitope on E2F3A and E2F3B were used to detect tagged proteins and TUBULIN was used as a loading control.
- (C) ChIP-qPCR validation using E2F1 or IgG antibodies in empty vector transduced HepG2 cells (pBH) or HepG2 cells overexpressing E2F1 (E2F1 pBH). Primers were designed to amplify regions with E2F binding as identified by ChIP-seq experiments described in Figure 6. TUBULIN is shown as a negative control.
- (D) ChIP-qPCR validation using MYC or IgG antibodies in empty vector transduced HepG2 cells (pBH) or HepG2 cells overexpressing MYC-tagged E2F3A (E2F3A pBH) or E2F3B (E2F3B pBH). Primers were designed to amplify regions with E2F binding as identified by ChIP-seq experiments described in Figure 6. TUBULIN is shown as a negative control.

## Supplemental Figure 5

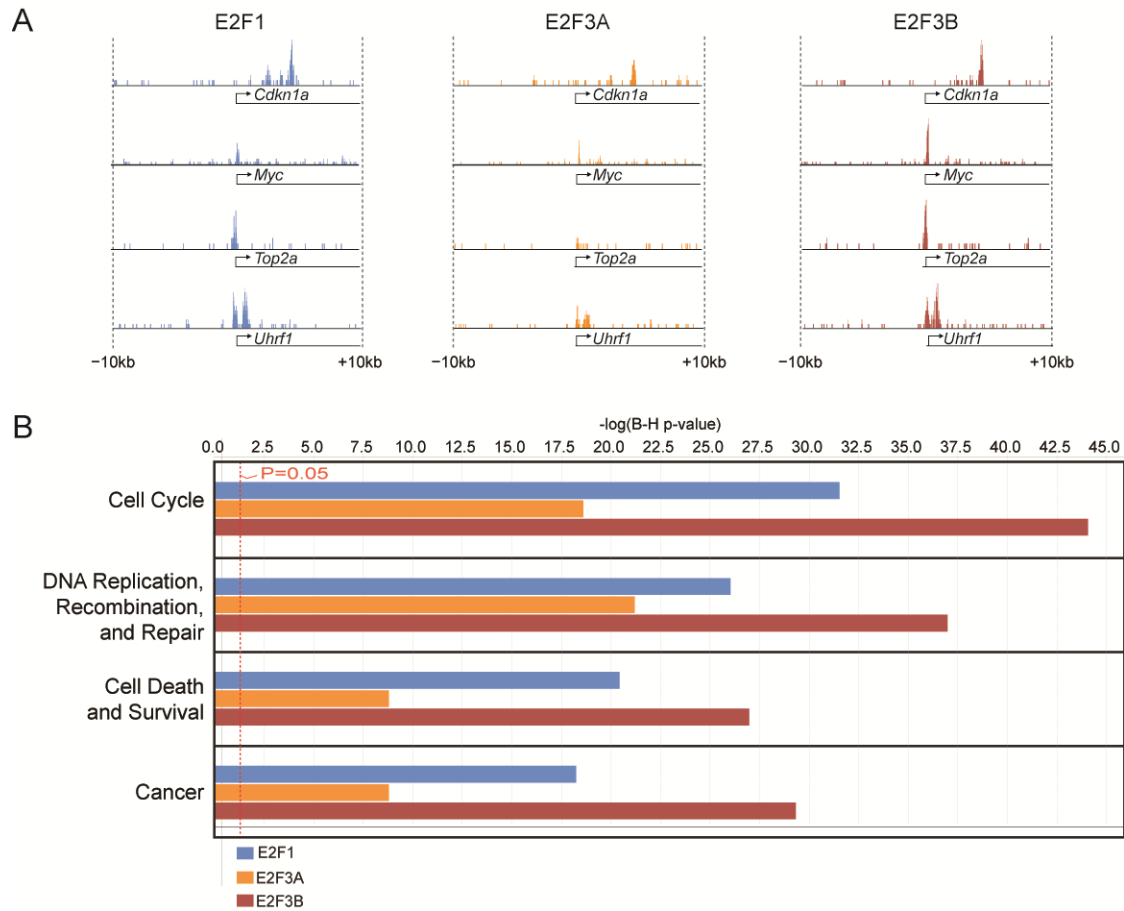

## Supplemental Figure 5

(A) Examples of the promoter occupancy of E2Fs on selected gene promoters. All are shown at the same scale.

(B) Gene ontology using Ingenuity pathway analysis (IPA) software depicts the estimated contribution of genes with promoters occupied by E2F1, E2F3A or E2F3B to biological processes. Bars indicate the Benjamini-Hochberg adjusted  $P$ -value, the threshold of  $P=0.05$  is shown.

Supplemental Figure 6

A

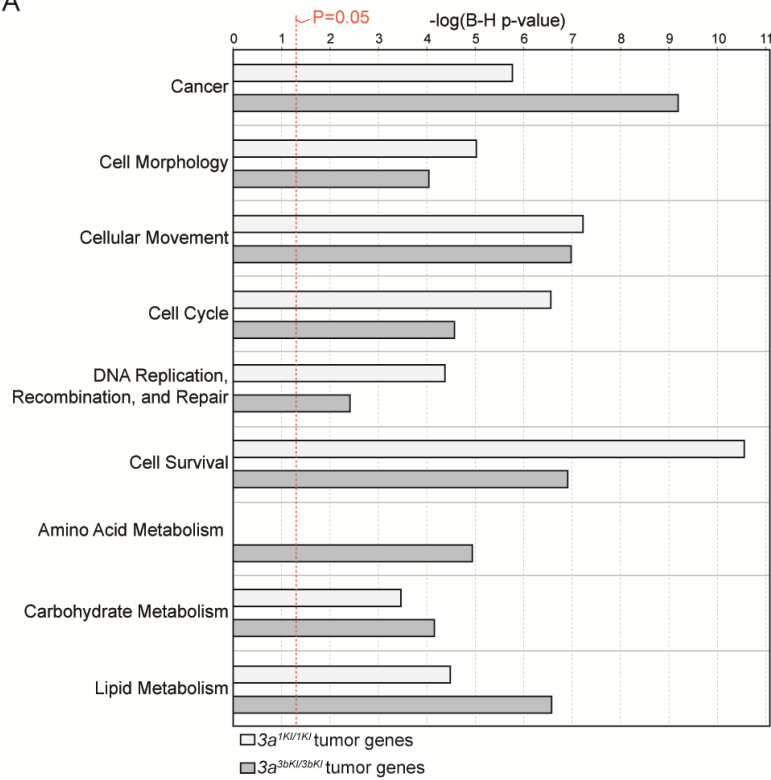

B

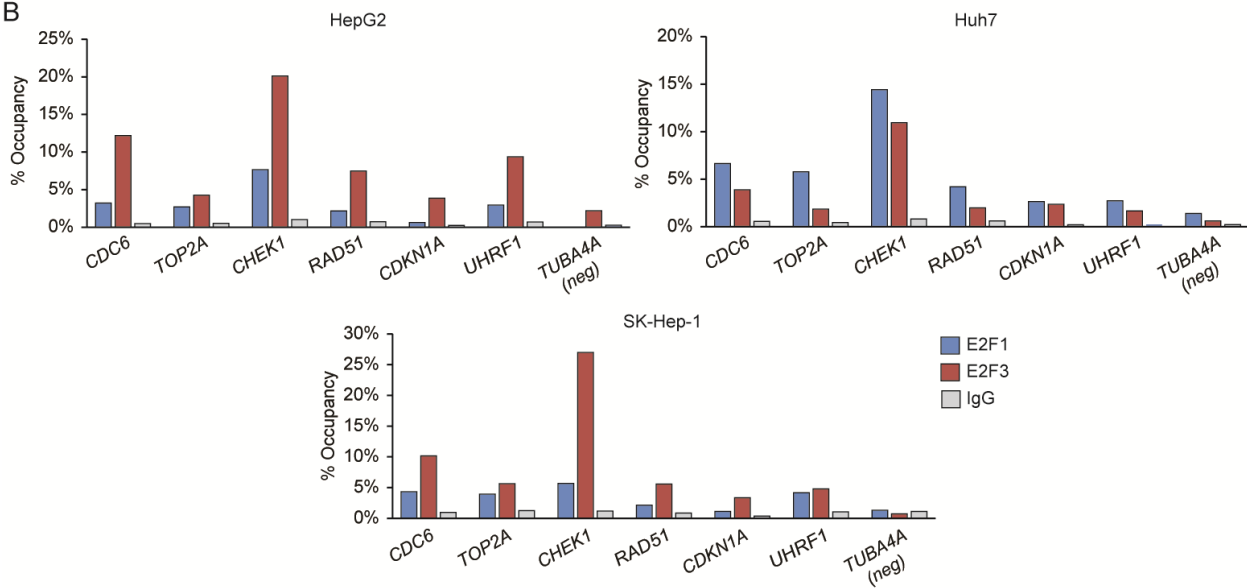



**Supplemental Figure 6**

- (A) Gene ontology using Ingenuity pathway analysis (IPA) software depicts the estimated contribution of genes with altered expression in  $3a^{1KI/1KI}$  or  $3a^{3bKI/3bKI}$  liver tumors (fold change  $\pm 1.5$ ,  $P \leq 0.05$  when compared to  $3a^{-/-}$  normal liver) to biological processes. Bars indicate the Benjamini-Hochberg adjusted  $P$ -value, the threshold of  $P=0.05$  is shown.
- (B) ChIP-qPCR validation using or IgG or antibodies against E2F1 or E2F3 in HepG2 and Huh7 HCC-derived and SK-Hep1 adenocarcinoma-derived cell lines. Occupancy of E2Fs on selected target promoters is shown. A non-promoter region of *TUBA4A* (*TUBA4A neg*) was used as a negative control. Primers were designed to amplify ChIP-seq identified peak regions.

Supplemental Figure 7

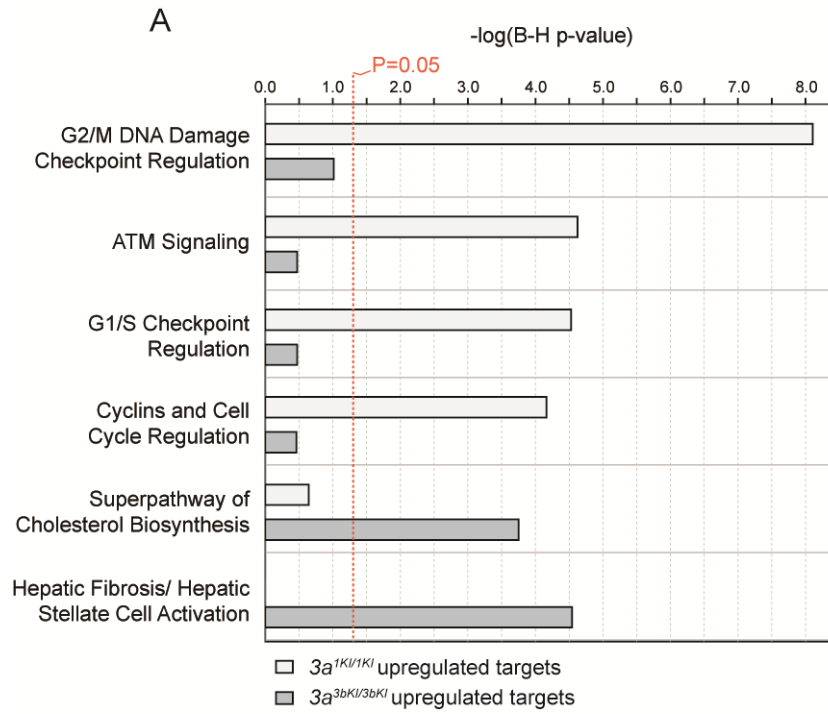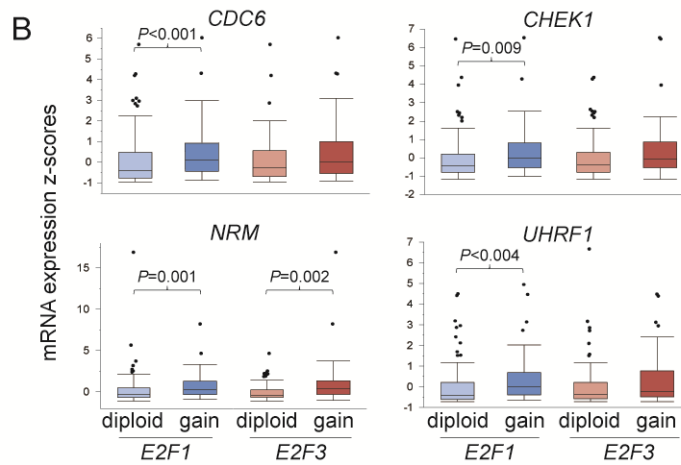

**Supplemental Figure 7**

(A) Gene ontology using Ingenuity pathway analysis (IPA) software depicts the estimated contribution of  $3a^{1KI/1KI}$  or  $3a^{3bKI/3bKI}$  upregulated targets to canonical pathways. Bars indicate the Benjamini-Hochberg adjusted  $P$ -value, the threshold of  $P=0.05$  is shown.

(B) Expression of E2F1 and E2F3B targets in human HCC samples with normal or increased copy numbers of *E2F1* and *E2F3*. *E2F1* diploid, 122 samples; gain, 62 samples. *E2F3* diploid, 102 samples; gain, 80 samples. Wilcoxon rank sum test  $P$  values are indicated.

**Supplemental Figure 8**

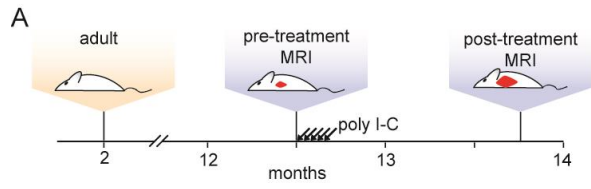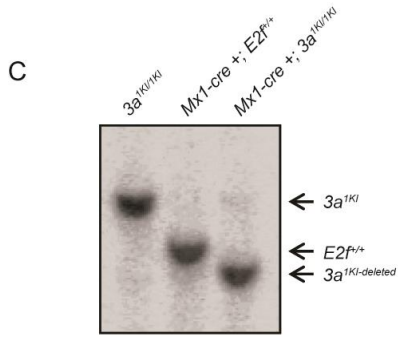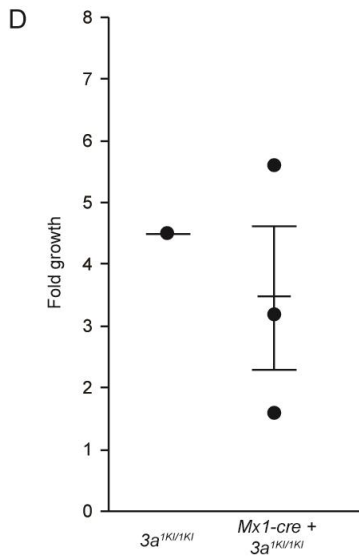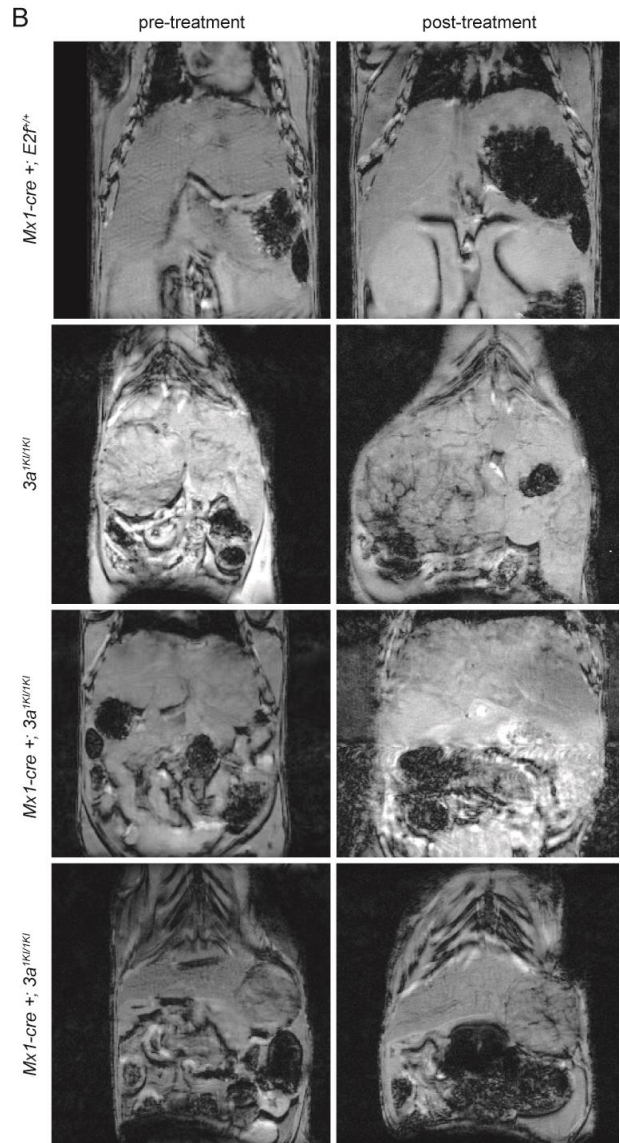

### Supplemental Figure 8

- (A) Schematic of experimental design illustrating the relative time points when mice were imaged by MRI and treated with poly I-C. Livers of twelve and a half-month-old-mice were visualized by MRI. The knockin alleles were then deleted in *Mx1-cre*  $3a^{1KI/1KI}$  mice by treating with poly I-C (5 injections, 10ug/g). A second MRI was taken 23-37 days after the start of poly I-C treatment.
- (B) Representative MRI images of mice with the indicated genotypes pre- and post-treatment with poly I-C.
- (C) Southern blot demonstrating successful deletion of knockin alleles using *Mx1-cre*.
- (D) Graph showing the fold growth of tumors in *Mx1-cre* negative (n=1) and positive  $3a^{1KI/1KI}$  (n=3) mice. Fold growth was calculated based on the volume of the tumor pre- and post-treatment with poly I-C. Individual values (dots) means (center line) and SEM (bars) are shown.

**SUPPLEMENTAL TABLES****Supplemental Table 1: Histopathological grading of hepatocellular carcinomas in DEN treated mice.**

Tumor diameter based on the largest carcinoma present, the overall tumor burden, the extent of necrosis, and presence of vascular invasion were all independently graded for hepatocellular carcinomas from DEN treated mice based on the table below. Scores were added together to generate a single pathological score for each animal.

| <b>Tumor Diameter: Volume Grade Score</b>     | <b>Criteria</b>                                                                                       |
|-----------------------------------------------|-------------------------------------------------------------------------------------------------------|
| 0                                             | No carcinoma present                                                                                  |
| 1                                             | Diameter of the largest carcinoma observed is $\leq$ one 100x field                                   |
| 2                                             | $>$ one 100x field and $<$ one 40x field                                                              |
| 3                                             | $>$ one 40x fields and $<$ one 20x field                                                              |
| 4                                             | $>$ one 20x field                                                                                     |
| <b>Tumor Burden: Multiplicity Grade Score</b> | <b>Criteria</b>                                                                                       |
| 0                                             | There is no additional carcinoma present that is equal to the diameter of the carcinoma scored above. |
| 1                                             | There are two or more carcinomas present with the same diameter score                                 |
| <b>Tumor Necrosis Score</b>                   | <b>Criteria</b>                                                                                       |
| 0                                             | Necrosis is absent                                                                                    |
| 1                                             | Necrosis is $\leq$ one 400x field                                                                     |
| 2                                             | Necrosis is $>$ one 400x field and $\leq$ one 200x field                                              |
| 3                                             | Necrosis is $>$ one 200x field and $\leq$ one 100x field                                              |
| 4                                             | Necrosis is $>$ one 100x field and $\leq$ one 40x field                                               |
| 5                                             | Necrosis is $>$ one 40x field                                                                         |
| <b>Vascular Invasion Score</b>                | <b>Criteria</b>                                                                                       |
| 0                                             | Absent                                                                                                |
| 1                                             | Present                                                                                               |

**Supplemental Table 2. Significant ChIP-seq E2F1 promoter peaks  
(+/- 2kb from the TSS)**

| <b>Gene Symbol</b> | <b>Refseq<br/>Transcript ID</b> | <b>Chromosome</b> | <b>Start</b> | <b>End</b> | <b>distance<br/>from TSS</b> |
|--------------------|---------------------------------|-------------------|--------------|------------|------------------------------|
| Dusp6              | NM_026268                       | chr10             | 98723587     | 98724166   | -1988                        |
| Rab26              | NM_177375                       | chr17             | 24672416     | 24672926   | -1980                        |
| Cirbp              | NM_007705                       | chr10             | 79628224     | 79629124   | -1911                        |
| Col19a1            | NM_007733                       | chr1              | 24595959     | 24596407   | -1908                        |
| Tnfrsf3            | NM_009397                       | chr10             | 18736777     | 18737453   | -1900                        |
| Hes1               | NM_008235                       | chr16             | 30063220     | 30063878   | -1893                        |
| 9330188P03Rik      | NR_102319                       | chr14             | 105986564    | 105987244  | -1861                        |
| Mir30e             | NR_029602                       | chr4              | 120446778    | 120447502  | -1839                        |
| Rfx4               | NM_001024918                    | chr10             | 84216717     | 84217236   | -1816                        |
| Ugt2a1             | NM_053184                       | chr5              | 87921423     | 87921918   | -1776                        |
| Birc2              | NM_007465                       | chr9              | 7836600      | 7837427    | -1760                        |
| Rarg               | NM_001042727                    | chr15             | 102078264    | 102079070  | -1737                        |
| Pbx3               | NM_016768                       | chr2              | 34229110     | 34229423   | -1703                        |
| Ywhaz              | NM_001253807                    | chr15             | 36721827     | 36722876   | -1666                        |
| Kif14              | NM_001287179                    | chr1              | 138362508    | 138363076  | -1632                        |
| Slc25a18           | NM_001081048                    | chr6              | 120721945    | 120722379  | -1623                        |
| Arpp21             | NM_001177623                    | chr9              | 112121193    | 112121657  | -1571                        |
| Stk40              | NM_001145827                    | chr4              | 125779381    | 125779929  | -1545                        |
| Mir148a            | NR_029719                       | chr6              | 51220558     | 51222228   | -1485                        |
| Egr2               | NM_010118                       | chr10             | 66998727     | 66999563   | -1471                        |
| Hnrnp1             | NM_177301                       | chr7              | 29594010     | 29594950   | -1428                        |
| Prr12              | NM_175022                       | chr7              | 52309388     | 52309926   | -1407                        |
| Kif16b             | NM_001081133                    | chr2              | 142728244    | 142728960  | -1403                        |
| Sfr1               | NM_026377                       | chr19             | 47804689     | 47805034   | -1384                        |
| Gcnt1              | NM_173442                       | chr19             | 17432255     | 17432797   | -1370                        |
| Rrm2               | NM_009104                       | chr12             | 25391487     | 25392050   | -1350                        |
| Zfp516             | NM_001177464                    | chr18             | 83082539     | 83082820   | -1344                        |
| Dusp6              | NM_026268                       | chr10             | 98724244     | 98724819   | -1333                        |
| Hcfc1              | NM_008224                       | chrX              | 71212642     | 71213413   | -1333                        |
| Ier2               | NM_010499                       | chr8              | 87187723     | 87188435   | -1329                        |
| Nr2f2              | NM_009697                       | chr7              | 77506460     | 77507080   | -1292                        |
| Nfatc4             | NM_001168346                    | chr14             | 56441859     | 56442853   | -1275                        |
| Ptma               | NM_008972                       | chr1              | 88421764     | 88422330   | -1263                        |
| Mir331             | NR_029764                       | chr10             | 93427572     | 93428162   | -1260                        |
| Wnk1               | NM_198703                       | chr6              | 119989509    | 119990281  | -1223                        |
| Hivep1             | NM_007772                       | chr13             | 42145908     | 42146454   | -1208                        |
| Bhlhe41            | NM_024469                       | chr6              | 145814764    | 145815474  | -1180                        |
| Maoa               | NM_173740                       | chrX              | 16195477     | 16195836   | -1167                        |
| Fbxw7              | NM_001177773                    | chr3              | 84617897     | 84618781   | -1159                        |
| Trib1              | NM_144549                       | chr15             | 59478767     | 59479402   | -1124                        |
| Large              | NM_010687                       | chr8              | 75877085     | 75878019   | -1098                        |
| Ctdspl             | NM_133710                       | chr9              | 118834346    | 118834779  | -1091                        |
| Hes1               | NM_008235                       | chr16             | 30063960     | 30064766   | -1079                        |
| Irf2bp2            | NM_001164598                    | chr8              | 129117750    | 129119047  | -1064                        |
| Pbx3               | NM_016768                       | chr2              | 34228169     | 34229049   | -1045                        |
| Cdkn2c             | NM_007671                       | chr4              | 109338559    | 109339477  | -1042                        |
| Eno3               | NM_001136062                    | chr11             | 70469311     | 70469993   | -1025                        |
| Memo1              | NM_133771                       | chr17             | 74694624     | 74695786   | -1003                        |

**Supplemental Table 2. Significant ChIP-seq E2F1 promoter peaks  
(+/- 2kb from the TSS)**

| <b>Gene Symbol</b> | <b>Refseq<br/>Transcript ID</b> | <b>Chromosome</b> | <b>Start</b> | <b>End</b> | <b>distance<br/>from TSS</b> |
|--------------------|---------------------------------|-------------------|--------------|------------|------------------------------|
| Lamb2              | NM_008483                       | chr9              | 108380905    | 108381514  | -983                         |
| Hmga1              | NM_001166535                    | chr17             | 27691772     | 27693323   | -971                         |
| Rusc1              | NM_001083808                    | chr3              | 88894730     | 88895104   | -965                         |
| Peli2              | NM_033602                       | chr14             | 48739325     | 48739834   | -964                         |
| Fosl2              | NM_008037                       | chr5              | 32437472     | 32438321   | -948                         |
| Khdrbs1            | NR_045036                       | chr4              | 129420279    | 129420702  | -945                         |
| Usp49              | NM_198421                       | chr17             | 47766353     | 47767079   | -922                         |
| Pi4k2a             | NM_145501                       | chr19             | 42163728     | 42164308   | -906                         |
| Arid1a             | NM_001080819                    | chr4              | 133310141    | 133310691  | -891                         |
| Fbxl19             | NM_172748                       | chr7              | 134888818    | 134890002  | -878                         |
| Mex3b              | NM_175366                       | chr7              | 90014597     | 90015343   | -872                         |
| Rps4x              | NM_009094                       | chrX              | 99384256     | 99384885   | -862                         |
| Fam83b             | NM_001045518                    | chr9              | 76394177     | 76394761   | -859                         |
| Stk11              | NM_011492                       | chr10             | 79578129     | 79578716   | -858                         |
| Gm5129             | NR_028426                       | chr5              | 30062990     | 30063652   | -846                         |
| Bcl11b             | NM_021399                       | chr12             | 109242309    | 109242622  | -843                         |
| Sppl3              | NM_029012                       | chr5              | 115460323    | 115461060  | -841                         |
| Irs2               | NM_001081212                    | chr8              | 11008925     | 11009608   | -838                         |
| G3bp1              | NM_013716                       | chr11             | 55281855     | 55282984   | -834                         |
| Rgs19              | NM_001291205                    | chr2              | 181427143    | 181427554  | -828                         |
| Sox12              | NM_011438                       | chr2              | 152224409    | 152224805  | -826                         |
| Pde10a             | NM_001290707                    | chr17             | 8718677      | 8719017    | -818                         |
| BC005537           | NM_024473                       | chr13             | 24892314     | 24893103   | -817                         |
| Ptprs              | NM_001252456                    | chr17             | 56602143     | 56602774   | -816                         |
| Dennd4b            | NM_201407                       | chr3              | 90069246     | 90070003   | -811                         |
| Gamt               | NM_010255                       | chr10             | 79724102     | 79724923   | -801                         |
| Maz                | NM_010772                       | chr7              | 134170352    | 134171232  | -800                         |
| Plekhh3            | NM_146030                       | chr11             | 101033239    | 101033584  | -797                         |
| Mir1191b           | NR_106141                       | chr10             | 80879451     | 80880198   | -784                         |
| Klf16              | NM_078477                       | chr10             | 80040111     | 80041522   | -777                         |
| Rnf139             | NM_175226                       | chr15             | 58719652     | 58720364   | -775                         |
| Actn1              | NM_134156                       | chr12             | 81361856     | 81362377   | -760                         |
| Efemp2             | NM_021474                       | chr19             | 5473709      | 5474179    | -745                         |
| Spats2             | NM_139140                       | chr15             | 98956188     | 98956902   | -730                         |
| Hivep2             | NM_010437                       | chr10             | 13685142     | 13685771   | -728                         |
| Rprd2              | NM_001081293                    | chr3              | 95623260     | 95623935   | -723                         |
| Sec14l1            | NM_001166506                    | chr11             | 116975535    | 116975991  | -722                         |
| Mex3a              | NM_001029890                    | chr3              | 88335188     | 88336007   | -719                         |
| Mrps30             | NM_021556                       | chr13             | 119176433    | 119177117  | -717                         |
| Camk2n2            | NM_028420                       | chr16             | 20621636     | 20622397   | -667                         |
| Meis2              | NM_001159568                    | chr2              | 115890972    | 115891937  | -662                         |
| Map3k3             | NM_011947                       | chr11             | 105945043    | 105946074  | -657                         |
| Hist1h2be          | NM_001290530                    | chr13             | 23678171     | 23678818   | -657                         |
| Eif3b              | NM_133916                       | chr5              | 140894172    | 140895039  | -653                         |
| Csnk1g2            | NM_134002                       | chr10             | 80084399     | 80085346   | -652                         |
| Atg10              | NM_025770                       | chr13             | 91363880     | 91364602   | -650                         |
| Ndst1              | NM_008306                       | chr18             | 60873379     | 60874000   | -648                         |
| Top1mt             | NM_028404                       | chr15             | 75509375     | 75510350   | -644                         |



**Supplemental Table 2. Significant ChIP-seq E2F1 promoter peaks  
(+/- 2kb from the TSS)**

| <b>Gene Symbol</b> | <b>Refseq<br/>Transcript ID</b> | <b>Chromosome</b> | <b>Start</b> | <b>End</b> | <b>distance<br/>from TSS</b> |
|--------------------|---------------------------------|-------------------|--------------|------------|------------------------------|
| Oxsr1              | NM_133985                       | chr9              | 119231853    | 119232513  | -639                         |
| Hist1h3i           | NM_178207                       | chr13             | 21875554     | 21876240   | -632                         |
| Fzd7               | NM_008057                       | chr1              | 59538065     | 59538658   | -629                         |
| Sdf2l1             | NM_022324                       | chr16             | 17132923     | 17133271   | -622                         |
| Rock2              | NM_009072                       | chr12             | 16900800     | 16901527   | -620                         |
| Spsb4              | NM_145134                       | chr9              | 96918935     | 96919850   | -620                         |
| Slc25a23           | NM_025877                       | chr17             | 57199663     | 57200124   | -609                         |
| Rpl30              | NM_001163485                    | chr15             | 34373317     | 34373957   | -607                         |
| Sp1                | NM_013672                       | chr15             | 102235491    | 102236791  | -605                         |
| Camta1             | NM_001081557                    | chr4              | 151236146    | 151236804  | -599                         |
| Spred1             | NM_033524                       | chr2              | 116945819    | 116946606  | -594                         |
| Zhx1               | NM_001042438                    | chr15             | 57908022     | 57909278   | -588                         |
| Fzr1               | NM_019757                       | chr10             | 80841420     | 80841963   | -578                         |
| Sp4                | NM_009239                       | chr12             | 119539997    | 119540977  | -575                         |
| Taf7               | NM_175770                       | chr18             | 37804165     | 37804693   | -572                         |
| Ubb                | NM_011664                       | chr11             | 62364211     | 62364657   | -571                         |
| H3f3a              | NM_008210                       | chr1              | 182743828    | 182744763  | -563                         |
| Ptp4a2             | NM_008974                       | chr4              | 129496885    | 129497437  | -561                         |
| Pidd1              | NM_022654                       | chr7              | 148629524    | 148630102  | -560                         |
| Gm53               | NR_037977                       | chr11             | 96112150     | 96112680   | -558                         |
| Ubp2               | NM_026872                       | chr4              | 41222525     | 41222919   | -555                         |
| Hnrnpa0            | NM_029872                       | chr13             | 58230147     | 58230788   | -552                         |
| Atn1               | NM_007881                       | chr6              | 124706719    | 124707389  | -550                         |
| Ccne1              | NM_007633                       | chr7              | 38892587     | 38893523   | -547                         |
| Mir210             | NR_029793                       | chr7              | 148407565    | 148408307  | -545                         |
| Sorcs2             | NM_030889                       | chr5              | 36740729     | 36741931   | -543                         |
| Wbp2               | NM_016852                       | chr11             | 115948229    | 115949394  | -535                         |
| Fnip2              | NM_001162999                    | chr3              | 79371892     | 79372366   | -529                         |
| Rnf26              | NM_153762                       | chr9              | 43921472     | 43921844   | -525                         |
| Usp1               | NM_146144                       | chr4              | 98589469     | 98590484   | -524                         |
| Rictor             | NM_030168                       | chr15             | 6657458      | 6658271    | -516                         |
| 1190002F15Rik      | NR_037956                       | chr6              | 134877764    | 134879426  | -514                         |
| Pim1               | NM_008842                       | chr17             | 29626960     | 29627995   | -512                         |
| Rfx3               | NM_011265                       | chr19             | 28085877     | 28086455   | -511                         |
| Pgk1               | NM_008828                       | chrX              | 103381637    | 103382218  | -511                         |
| Hmgn5              | NM_016710                       | chrX              | 106209005    | 106209452  | -511                         |
| Fads2              | NM_019699                       | chr19             | 10176157     | 10176810   | -492                         |
| Tcf3               | NM_001164147                    | chr10             | 79896433     | 79897343   | -491                         |
| Cables2            | NM_145851                       | chr2              | 180008391    | 180008925  | -489                         |
| Hdgfrp2            | NM_008233                       | chr17             | 56217877     | 56219309   | -486                         |
| Zfp395             | NM_199029                       | chr14             | 65976591     | 65977464   | -485                         |
| Dleu2              | NR_028264                       | chr14             | 62301155     | 62302230   | -484                         |
| Rnf130             | NM_001290750                    | chr11             | 49838070     | 49838631   | -482                         |
| Pabpc1             | NM_008774                       | chr15             | 36538652     | 36539764   | -481                         |
| Gphn               | NM_145965                       | chr12             | 79326861     | 79327461   | -480                         |
| Slc19a2            | NM_001276455                    | chr1              | 166178352    | 166179048  | -476                         |
| Rbpj               | NM_009035                       | chr5              | 53980447     | 53981772   | -475                         |
| Sorbs3             | NM_001271408                    | chr14             | 70604580     | 70605224   | -473                         |

**Supplemental Table 2. Significant ChIP-seq E2F1 promoter peaks  
(+/- 2kb from the TSS)**

| <b>Gene Symbol</b> | <b>Refseq<br/>Transcript ID</b> | <b>Chromosome</b> | <b>Start</b> | <b>End</b> | <b>distance<br/>from TSS</b> |
|--------------------|---------------------------------|-------------------|--------------|------------|------------------------------|
| Zfp219             | NM_001253694                    | chr14             | 52639510     | 52640208   | -472                         |
| Khsrp              | NM_010613                       | chr17             | 57170865     | 57171934   | -471                         |
| Hsd17b12           | NM_019657                       | chr2              | 93998195     | 93998867   | -466                         |
| Samd4b             | NM_175021                       | chr7              | 29221439     | 29221906   | -464                         |
| Rarg               | NM_001042727                    | chr15             | 102077100    | 102077679  | -460                         |
| Msl2               | NM_001100451                    | chr9              | 100977782    | 100978287  | -451                         |
| Fchsd2             | NM_001146010                    | chr7              | 108256586    | 108257091  | -450                         |
| Smg7               | NM_001160256                    | chr1              | 154750022    | 154750416  | -444                         |
| Rfx2               | NM_009056                       | chr17             | 56970486     | 56971258   | -442                         |
| Btg3               | NM_009770                       | chr16             | 78377184     | 78377756   | -441                         |
| Ran                | NM_009391                       | chr5              | 129525157    | 129526029  | -437                         |
| Xpo1               | NM_001035226                    | chr11             | 23155161     | 23156047   | -436                         |
| Cit                | NM_007708                       | chr5              | 116294862    | 116295598  | -434                         |
| Pes1               | NM_022889                       | chr11             | 3863248      | 3863843    | -432                         |
| Hspa9              | NM_010481                       | chr18             | 35113960     | 35114911   | -432                         |
| Zbed4              | NM_181412                       | chr15             | 88581423     | 88582007   | -425                         |
| Btbd10             | NM_133700                       | chr7              | 120512906    | 120513647  | -425                         |
| Sec11a             | NM_019951                       | chr7              | 88092436     | 88093281   | -424                         |
| Tmem55b            | NM_001033271                    | chr14             | 51550526     | 51551362   | -421                         |
| Brat1              | NM_181066                       | chr5              | 141180130    | 141180967  | -416                         |
| Srsf3              | NM_013663                       | chr17             | 29168491     | 29169888   | -415                         |
| Uvssa              | NM_001081101                    | chr5              | 33720521     | 33721340   | -414                         |
| Sh3bp4             | NM_133816                       | chr1              | 90966216     | 90967030   | -413                         |
| Gtpbp1             | NM_013818                       | chr15             | 79520372     | 79521455   | -412                         |
| Lhx2               | NM_010710                       | chr2              | 38206154     | 38206678   | -411                         |
| Uvrug              | NM_178635                       | chr7              | 106289884    | 106290244  | -411                         |
| Ppp1r7             | NM_023200                       | chr1              | 95239053     | 95240568   | -411                         |
| Adh5               | NM_007410                       | chr3              | 138105193    | 138106100  | -410                         |
| Stim1              | NM_009287                       | chr7              | 109415618    | 109416245  | -406                         |
| Ywhaq              | NM_011739                       | chr12             | 21423400     | 21423998   | -403                         |
| Kpnb1              | NM_008379                       | chr11             | 97049031     | 97050180   | -401                         |
| Odc1               | NM_013614                       | chr12             | 17550989     | 17551567   | -400                         |
| Vcl                | NM_009502                       | chr14             | 21747753     | 21748759   | -398                         |
| Ubtf               | NM_011551                       | chr11             | 102180490    | 102181121  | -397                         |
| Pigv               | NM_178698                       | chr4              | 133228647    | 133229264  | -395                         |
| Rab1               | NM_008996                       | chr11             | 20100806     | 20101616   | -393                         |
| Tbl2               | NM_013763                       | chr5              | 135624653    | 135625722  | -393                         |
| Yy1                | NM_009537                       | chr12             | 110030979    | 110031283  | -389                         |
| Dnajc4             | NM_020566                       | chr19             | 7066898      | 7067399    | -388                         |
| Gkap1              | NM_019832                       | chr13             | 58375562     | 58376307   | -387                         |
| Mrpl34             | NM_053162                       | chr8              | 73988191     | 73988694   | -382                         |
| Rps19              | NM_023133                       | chr7              | 25668929     | 25669775   | -380                         |
| Farp2              | NM_145519                       | chr1              | 95407857     | 95408747   | -378                         |
| Sin3a              | NM_001110350                    | chr9              | 56923505     | 56924106   | -377                         |
| Lrp12              | NM_172814                       | chr15             | 39775272     | 39776084   | -376                         |
| Itfg2              | NM_133927                       | chr6              | 128374877    | 128375728  | -376                         |
| Mtrf1l             | NM_175374                       | chr10             | 4521836      | 4522611    | -374                         |
| Hnrnpf             | NM_001166429                    | chr6              | 117857193    | 117857703  | -373                         |

**Supplemental Table 2. Significant ChIP-seq E2F1 promoter peaks  
(+/- 2kb from the TSS)**

| <b>Gene Symbol</b> | <b>Refseq<br/>Transcript ID</b> | <b>Chromosome</b> | <b>Start</b> | <b>End</b> | <b>distance<br/>from TSS</b> |
|--------------------|---------------------------------|-------------------|--------------|------------|------------------------------|
| Ak1                | NM_001198791                    | chr2              | 32480294     | 32480873   | -373                         |
| Mfsd11             | NM_178620                       | chr11             | 116714325    | 116715602  | -365                         |
| Avpi1              | NM_027106                       | chr19             | 42203621     | 42204071   | -364                         |
| Ap2a1              | NM_007458                       | chr7              | 52184999     | 52185447   | -364                         |
| Cul1               | NM_012042                       | chr6              | 47403726     | 47404194   | -362                         |
| Snhg8              | NR_028574                       | chr3              | 123211200    | 123212028  | -361                         |
| Zfp361             | NM_007564                       | chr12             | 81213674     | 81215044   | -360                         |
| Mef2d              | NM_133665                       | chr3              | 87945624     | 87946289   | -360                         |
| Otud4              | NM_001256033                    | chr8              | 82162853     | 82163580   | -358                         |
| Stag1              | NM_009282                       | chr9              | 100543152    | 100544216  | -357                         |
| Myl12a             | NM_026064                       | chr17             | 71351890     | 71352565   | -356                         |
| Trio               | NM_001081302                    | chr15             | 27955559     | 27956351   | -353                         |
| Hoxc9              | NM_008272                       | chr15             | 102806866    | 102807356  | -351                         |
| Asna1              | NM_019652                       | chr8              | 87549156     | 87549894   | -349                         |
| Zkscan5            | NM_001167944                    | chr5              | 145964766    | 145965391  | -349                         |
| D930048N14Rik      | NR_027958                       | chr11             | 51463834     | 51464382   | -347                         |
| Rab40c             | NM_139154                       | chr17             | 26056765     | 26057245   | -347                         |
| Dusp14             | NM_019819                       | chr11             | 83881923     | 83882486   | -347                         |
| Cblb               | NM_001033238                    | chr16             | 52031126     | 52031503   | -347                         |
| Tpst2              | NM_009419                       | chr5              | 112705120    | 112705641  | -346                         |
| Snord1c            | NR_028569                       | chr11             | 116533178    | 116533772  | -343                         |
| Pcbp2              | NM_011042                       | chr15             | 102300342    | 102301096  | -343                         |
| Sec31a             | NM_026969                       | chr5              | 100845221    | 100845969  | -343                         |
| Lcorl              | NM_178142                       | chr5              | 46248706     | 46249534   | -342                         |
| Dcbld2             | NM_028523                       | chr16             | 58407971     | 58408640   | -342                         |
| Cd164              | NM_016898                       | chr10             | 41238663     | 41239267   | -340                         |
| Wtap               | NM_175394                       | chr17             | 13185395     | 13186092   | -340                         |
| Foxp4              | NM_001110825                    | chr17             | 48061493     | 48062345   | -339                         |
| Hnrnpul1           | NM_144922                       | chr7              | 26539581     | 26540569   | -337                         |
| Cercam             | NM_207298                       | chr2              | 29724480     | 29724875   | -336                         |
| Foxn2              | NM_180974                       | chr17             | 88839343     | 88840093   | -333                         |
| Ubqln4             | NM_033526                       | chr3              | 88356772     | 88357836   | -333                         |
| Hexim1             | NM_138753                       | chr11             | 102976984    | 102977628  | -332                         |
| Ipo5               | NM_023579                       | chr14             | 121309805    | 121310361  | -332                         |
| Cox20              | NM_025511                       | chr1              | 180248494    | 180249409  | -332                         |
| Ate1               | NM_001136054                    | chr7              | 137662934    | 137663915  | -332                         |
| Nlk                | NM_008702                       | chr11             | 78510912     | 78511601   | -331                         |
| BC003331           | NM_001077237                    | chr1              | 152240121    | 152240906  | -330                         |
| Zbed3              | NM_028106                       | chr13             | 96094613     | 96095110   | -330                         |
| Pank1              | NM_023792                       | chr19             | 34952456     | 34953014   | -329                         |
| Zfand5             | NM_009551                       | chr19             | 21346176     | 21346702   | -328                         |
| Ulk4               | NM_177589                       | chr9              | 121186165    | 121187069  | -328                         |
| Troap              | NM_001162506                    | chr15             | 98904756     | 98905396   | -327                         |
| Ppp1cb             | NM_172707                       | chr5              | 32760638     | 32761392   | -327                         |
| Klhdc10            | NM_029742                       | chr6              | 30351215     | 30351948   | -327                         |
| Nfix               | NM_001081981                    | chr8              | 87298272     | 87298915   | -327                         |
| Hist1h2af          | NM_175661                       | chr13             | 23625130     | 23625776   | -326                         |
| Vkorc11            | NM_001001327                    | chr5              | 130417308    | 130418000  | -324                         |

**Supplemental Table 2. Significant ChIP-seq E2F1 promoter peaks  
(+/- 2kb from the TSS)**

| <b>Gene Symbol</b> | <b>Refseq<br/>Transcript ID</b> | <b>Chromosome</b> | <b>Start</b> | <b>End</b> | <b>distance<br/>from TSS</b> |
|--------------------|---------------------------------|-------------------|--------------|------------|------------------------------|
| Rgl2               | NM_009059                       | chr17             | 34066290     | 34066740   | -323                         |
| Dnajc14            | NM_028873                       | chr10             | 128241987    | 128242830  | -323                         |
| Fam193b            | NM_145382                       | chr13             | 55672495     | 55673110   | -323                         |
| Azin1              | NM_018745                       | chr15             | 38448964     | 38449720   | -322                         |
| Htatsf1            | NM_028242                       | chrX              | 54305979     | 54306872   | -321                         |
| E2f8               | NM_001013368                    | chr7              | 56136211     | 56137247   | -319                         |
| Ing1               | NM_011919                       | chr8              | 11555248     | 11556245   | -319                         |
| Ptma               | NM_008972                       | chr1              | 88422654     | 88423331   | -318                         |
| Akap1              | NM_001042541                    | chr11             | 88725826     | 88726607   | -318                         |
| Zfp46              | NM_009557                       | chr4              | 135841294    | 135842040  | -316                         |
| Stxbp1             | NM_001113569                    | chr2              | 32702795     | 32703348   | -316                         |
| Gls2               | NM_001033264                    | chr10             | 127631191    | 127631560  | -315                         |
| Atxn2l             | NM_183020                       | chr7              | 133646803    | 133647455  | -314                         |
| Cep120             | NM_178686                       | chr18             | 53904221     | 53904804   | -313                         |
| Rnf4               | NM_011278                       | chr5              | 34678390     | 34679062   | -312                         |
| Siva1              | NM_001161737                    | chr12             | 113882406    | 113883049  | -311                         |
| Fam73b             | NM_001242407                    | chr2              | 30218923     | 30219960   | -311                         |
| Pdcd10             | NM_019745                       | chr3              | 75360877     | 75361289   | -310                         |
| Lrr1               | NM_001081406                    | chr12             | 70269027     | 70269954   | -310                         |
| Klf10              | NM_001289471                    | chr15             | 38229982     | 38231567   | -310                         |
| Mlec               | NM_175403                       | chr5              | 115607967    | 115609016  | -308                         |
| Dnajc3             | NM_008929                       | chr14             | 119336530    | 119337162  | -307                         |
| Rab8a              | NM_023126                       | chr8              | 74684249     | 74685333   | -307                         |
| D230025D16Rik      | NM_145604                       | chr8              | 107748389    | 107749171  | -307                         |
| Arhgap35           | NM_172739                       | chr7              | 17200274     | 17201021   | -307                         |
| Pop7               | NM_028753                       | chr5              | 137943500    | 137944422  | -305                         |
| Pja2               | NM_144859                       | chr17             | 64680969     | 64682082   | -304                         |
| Zfp36l2            | NM_001001806                    | chr17             | 84586904     | 84588271   | -302                         |
| Opn3               | NM_010098                       | chr1              | 177622697    | 177623429  | -301                         |
| Eif3l              | NM_145139                       | chr15             | 78904836     | 78905868   | -300                         |
| Ift27              | NM_025931                       | chr15             | 78004406     | 78005267   | -300                         |
| Ptpn21             | NM_011877                       | chr12             | 99972829     | 99973476   | -299                         |
| Rfwd3              | NM_146218                       | chr8              | 113823861    | 113824977  | -298                         |
| Osbpl8             | NM_175489                       | chr10             | 110601180    | 110601939  | -298                         |
| lws1               | NM_173441                       | chr18             | 32226696     | 32227485   | -297                         |
| D830031N03Rik      | NM_001167918                    | chr4              | 123088999    | 123089900  | -297                         |
| Lgals1             | NM_008495                       | chr15             | 78756436     | 78757280   | -296                         |
| Rbm33              | NM_028234                       | chr5              | 28643122     | 28643742   | -296                         |
| Lrrc20             | NM_153542                       | chr10             | 60937963     | 60938606   | -296                         |
| Slmo2              | NM_025531                       | chr2              | 174298441    | 174299030  | -295                         |
| Ost4               | NM_001134692                    | chr5              | 31210090     | 31210819   | -295                         |
| Mxd3               | NM_016662                       | chr13             | 55430799     | 55431969   | -294                         |
| Mtfr1              | NM_026182                       | chr3              | 19087554     | 19088299   | -294                         |
| Mtf1               | NM_008636                       | chr4              | 124479196    | 124479803  | -293                         |
| Utp3               | NM_023054                       | chr5              | 88982868     | 88983561   | -293                         |
| Smc3               | NM_007790                       | chr19             | 53674119     | 53675067   | -292                         |
| Atf4               | NM_009716                       | chr15             | 80084732     | 80085911   | -292                         |
| Ezh2               | NM_007971                       | chr6              | 47544888     | 47545751   | -292                         |

**Supplemental Table 2. Significant ChIP-seq E2F1 promoter peaks  
(+/- 2kb from the TSS)**

| <b>Gene Symbol</b> | <b>Refseq<br/>Transcript ID</b> | <b>Chromosome</b> | <b>Start</b> | <b>End</b> | <b>distance<br/>from TSS</b> |
|--------------------|---------------------------------|-------------------|--------------|------------|------------------------------|
| Fdft1              | NM_010191                       | chr14             | 63796552     | 63797287   | -291                         |
| Tmem55a            | NM_028264                       | chr4              | 14790886     | 14791263   | -291                         |
| Mcfd2              | NM_176808                       | chr17             | 87665181     | 87665970   | -290                         |
| Afmid              | NM_027827                       | chr11             | 117686568    | 117687318  | -289                         |
| 1810026B05Rik      | NR_037569                       | chr7              | 80703214     | 80703923   | -289                         |
| Fzd5               | NM_001042659                    | chr1              | 64784300     | 64784920   | -287                         |
| Nckap5l            | NM_001001884                    | chr15             | 99288113     | 99288817   | -287                         |
| Mir5133            | NR_039595                       | chr9              | 61970204     | 61971170   | -287                         |
| Nap1l1             | NM_015781                       | chr10             | 110909555    | 110910367  | -286                         |
| Hmgn1              | NM_008251                       | chr16             | 96349108     | 96350126   | -286                         |
| Prkce              | NM_011104                       | chr17             | 86566561     | 86567120   | -284                         |
| Kmt2b              | NM_029274                       | chr7              | 31373819     | 31374236   | -284                         |
| Morc2a             | NM_001159288                    | chr11             | 3549069      | 3549358    | -283                         |
| Armc1              | NM_028840                       | chr3              | 19063118     | 19063575   | -283                         |
| Set                | NM_001204875                    | chr2              | 29921296     | 29922127   | -282                         |
| Gna12              | NM_010302                       | chr5              | 141306416    | 141306913  | -281                         |
| Psm1               | NM_011965                       | chr7              | 121419602    | 121420214  | -279                         |
| 1700001G11Rik      | NR_038077                       | chr14             | 66915844     | 66916643   | -279                         |
| Srsf4              | NM_020587                       | chr4              | 131428964    | 131429585  | -279                         |
| Cdc34              | NM_177613                       | chr10             | 79144404     | 79144918   | -278                         |
| Fmn1               | NM_010230                       | chr2              | 113167310    | 113167918  | -278                         |
| Hist1h3b           | NM_178203                       | chr13             | 23843617     | 23844324   | -278                         |
| Gan                | NM_001081151                    | chr8              | 119681556    | 119681958  | -277                         |
| 1810013L24Rik      | NM_001081400                    | chr16             | 8829342      | 8830492    | -275                         |
| Mcoln1             | NM_053177                       | chr8              | 3499884      | 3500602    | -275                         |
| Cdk19              | NM_198164                       | chr10             | 40068302     | 40069375   | -275                         |
| Slc35b2            | NM_028662                       | chr17             | 45700491     | 45701160   | -275                         |
| Plxna3             | NM_008883                       | chrX              | 71573753     | 71574507   | -274                         |
| Ddx50              | NM_053183                       | chr10             | 62113762     | 62114675   | -274                         |
| Wdtdc1             | NM_199306                       | chr4              | 132895119    | 132895885  | -273                         |
| Neur14             | NM_001291118                    | chr11             | 69714803     | 69715287   | -272                         |
| Cdca7              | NM_025866                       | chr2              | 72313591     | 72314415   | -272                         |
| Ncapd2             | NM_146171                       | chr6              | 125141496    | 125142251  | -271                         |
| Gnaz               | NM_010311                       | chr10             | 74429511     | 74429899   | -270                         |
| Tmco3              | NM_172282                       | chr8              | 13287373     | 13288111   | -270                         |
| Fam83d             | NM_027975                       | chr2              | 158593094    | 158594035  | -270                         |
| Trappc10           | NM_001081055                    | chr10             | 77707391     | 77707917   | -268                         |
| Tomm7              | NM_025394                       | chr5              | 23349913     | 23350542   | -266                         |
| Kpna3              | NM_008466                       | chr14             | 62058703     | 62059393   | -265                         |
| Mapk7              | NM_001291035                    | chr11             | 61307712     | 61308348   | -263                         |
| Drg1               | NM_007879                       | chr11             | 3166348      | 3166951    | -262                         |
| Bicd2              | NM_001039179                    | chr13             | 49436379     | 49436932   | -262                         |
| Rhob               | NM_007483                       | chr12             | 8506732      | 8507370    | -261                         |
| Ebag9              | NM_019480                       | chr15             | 44450490     | 44451361   | -261                         |
| Zcwpw1             | NM_001005426                    | chr5              | 138228261    | 138229276  | -261                         |
| Nup153             | NM_175749                       | chr13             | 46823263     | 46823691   | -260                         |
| Mob3a              | NM_172457                       | chr10             | 80164330     | 80165317   | -260                         |
| Lrrc51             | NM_001162973                    | chr7              | 109082355    | 109082902  | -259                         |

**Supplemental Table 2. Significant ChIP-seq E2F1 promoter peaks  
(+/- 2kb from the TSS)**

| <b>Gene Symbol</b> | <b>Refseq<br/>Transcript ID</b> | <b>Chromosome</b> | <b>Start</b> | <b>End</b> | <b>distance<br/>from TSS</b> |
|--------------------|---------------------------------|-------------------|--------------|------------|------------------------------|
| Pgrmc2             | NM_027558                       | chr3              | 40886657     | 40887791   | -257                         |
| Cdkn2a             | NM_009877                       | chr4              | 88940273     | 88941285   | -257                         |
| Ado                | NM_001005419                    | chr10             | 67011666     | 67012249   | -256                         |
| Hmgcr              | NM_008255                       | chr13             | 97440792     | 97441497   | -255                         |
| Cep95              | NM_001166685                    | chr11             | 106649672    | 106650951  | -254                         |
| Gpr3               | NM_008154                       | chr4              | 132768413    | 132768992  | -253                         |
| Mlxip              | NM_133917                       | chr5              | 123844062    | 123845047  | -252                         |
| Gemin8             | NM_146238                       | chrX              | 162607796    | 162608523  | -252                         |
| Bag6               | NM_057171                       | chr17             | 35271546     | 35272197   | -251                         |
| Lemd2              | NM_146075                       | chr17             | 27341386     | 27341878   | -250                         |
| Nmt2               | NM_001290370                    | chr2              | 3200708      | 3201758    | -250                         |
| Mageb3             | NM_008545                       | chr2              | 121781371    | 121782783  | -250                         |
| 2410002F23Rik      | NM_025880                       | chr7              | 51501369     | 51502315   | -249                         |
| Eif2s3x            | NM_012010                       | chrX              | 91457933     | 91458543   | -249                         |
| Ak2                | NM_016895                       | chr4              | 128669771    | 128670668  | -248                         |
| Maged1             | NM_019791                       | chrX              | 91787448     | 91787869   | -247                         |
| Herpud2            | NM_020586                       | chr9              | 24956199     | 24956850   | -246                         |
| Gmeb2              | NM_198169                       | chr2              | 181022574    | 181023256  | -245                         |
| Phf19              | NM_028716                       | chr2              | 34769357     | 34770120   | -244                         |
| Chac1              | NM_026929                       | chr2              | 119176349    | 119177118  | -244                         |
| Dcun1d4            | NM_178896                       | chr5              | 73881742     | 73882299   | -244                         |
| Pcdhgc3            | NM_033581                       | chr18             | 37965476     | 37966164   | -243                         |
| Mgat1              | NM_010794                       | chr11             | 49057236     | 49057666   | -241                         |
| Tra2a              | NM_198102                       | chr6              | 49213958     | 49214623   | -241                         |
| Pcdh9              | NM_001271798                    | chr14             | 94289717     | 94290537   | -240                         |
| Fbxo10             | NM_001024142                    | chr4              | 45097337     | 45098092   | -240                         |
| Ube2n              | NM_080560                       | chr10             | 94977054     | 94978058   | -239                         |
| Metap1d            | NM_025633                       | chr2              | 71290773     | 71291537   | -239                         |
| Fem1c              | NM_173423                       | chr18             | 46685643     | 46686082   | -239                         |
| Kmt2a              | NM_001081049                    | chr9              | 44689338     | 44689851   | -239                         |
| Lsm2               | NM_001110101                    | chr17             | 35117583     | 35119537   | -238                         |
| Ric8b              | NM_183172                       | chr10             | 84379636     | 84380604   | -237                         |
| Farp1              | NM_134082                       | chr14             | 121434148    | 121434968  | -237                         |
| Mbd2               | NM_010773                       | chr18             | 70727388     | 70728028   | -237                         |
| Rps6ka5            | NM_153587                       | chr12             | 101963101    | 101963846  | -237                         |
| Stag3              | NM_016964                       | chr5              | 138721165    | 138721835  | -236                         |
| H2afv              | NM_029938                       | chr11             | 6344148      | 6345213    | -236                         |
| Dscc1              | NM_183089                       | chr15             | 54921861     | 54922674   | -236                         |
| Nmt1               | NM_008707                       | chr11             | 102889291    | 102889989  | -235                         |
| Tnrc6b             | NM_177124                       | chr15             | 80628176     | 80629432   | -235                         |
| Sgcd               | NM_011891                       | chr11             | 47192585     | 47193490   | -235                         |
| Cbfa2t2            | NM_009823                       | chr2              | 154261839    | 154262133  | -233                         |
| Pa2g4              | NM_011119                       | chr10             | 128002664    | 128003778  | -232                         |
| Lin37              | NM_001290569                    | chr7              | 31344602     | 31345190   | -232                         |
| Ilf3               | NM_001277321                    | chr9              | 21171742     | 21172422   | -232                         |
| Hinfp              | NM_172162                       | chr9              | 44113797     | 44114173   | -232                         |
| Lztr1              | NM_025808                       | chr16             | 17508523     | 17509140   | -232                         |
| Gltp               | NM_019821                       | chr5              | 115140800    | 115141548  | -231                         |

**Supplemental Table 2. Significant ChIP-seq E2F1 promoter peaks  
(+/- 2kb from the TSS)**

| <b>Gene Symbol</b> | <b>Refseq<br/>Transcript ID</b> | <b>Chromosome</b> | <b>Start</b> | <b>End</b> | <b>distance<br/>from TSS</b> |
|--------------------|---------------------------------|-------------------|--------------|------------|------------------------------|
| Nsun6              | NM_001165943                    | chr2              | 14976445     | 14977012   | -231                         |
| Kcnab2             | NM_010598                       | chr4              | 151851565    | 151852208  | -230                         |
| Vdac2              | NM_011695                       | chr14             | 22650026     | 22651081   | -229                         |
| Man1c1             | NM_207237                       | chr4              | 134260216    | 134260648  | -228                         |
| Rita1              | NM_133908                       | chr5              | 121062531    | 121063119  | -228                         |
| Taco1              | NM_027346                       | chr11             | 105926886    | 105927499  | -228                         |
| Ano6               | NM_001253813                    | chr15             | 95620663     | 95621428   | -228                         |
| BC004004           | NM_030561                       | chr17             | 29405006     | 29406003   | -228                         |
| Smg5               | NM_178246                       | chr3              | 88139422     | 88140487   | -227                         |
| Ube2s              | NM_133777                       | chr7              | 4763859      | 4764476    | -227                         |
| Snx13              | NM_001014973                    | chr12             | 35731243     | 35732028   | -225                         |
| Sco2               | NM_001111288                    | chr15             | 89204125     | 89204819   | -224                         |
| Mex3c              | NM_001039214                    | chr18             | 73731800     | 73732468   | -224                         |
| Fam168a            | NM_178764                       | chr7              | 107854524    | 107855458  | -224                         |
| Cpsf2              | NM_016856                       | chr12             | 103213692    | 103214227  | -224                         |
| 4632415L05Rik      | NR_027985                       | chr3              | 19794474     | 19794819   | -224                         |
| Serbp1             | NM_001113564                    | chr6              | 67216254     | 67217243   | -224                         |
| Mdm1               | NM_148922                       | chr10             | 117578300    | 117578938  | -223                         |
| Shc1               | NM_001113331                    | chr3              | 89224963     | 89225675   | -223                         |
| Scaf4              | NM_178923                       | chr16             | 90284688     | 90285095   | -223                         |
| Katnb1             | NM_028805                       | chr8              | 97604384     | 97605372   | -222                         |
| Alcam              | NM_009655                       | chr16             | 52453003     | 52453656   | -221                         |
| Ndufaf3            | NM_023247                       | chr9              | 108469576    | 108470208  | -220                         |
| Pgp                | NM_025954                       | chr17             | 24606720     | 24607675   | -220                         |
| Ppig               | NM_001081086                    | chr2              | 69560651     | 69561198   | -220                         |
| Pts                | NM_011220                       | chr9              | 50336609     | 50337319   | -219                         |
| Fam214a            | NM_001113283                    | chr9              | 74800336     | 74800944   | -219                         |
| Tmem256            | NM_026982                       | chr11             | 69651472     | 69652143   | -219                         |
| Rad51d             | NM_001277939                    | chr11             | 82704054     | 82704633   | -219                         |
| H2-Ke6             | NM_013543                       | chr17             | 34164813     | 34165622   | -219                         |
| Tiparp             | NM_178892                       | chr3              | 65331890     | 65332409   | -219                         |
| Kbtbd8             | NM_001008785                    | chr6              | 95067458     | 95067851   | -219                         |
| Snip1              | NM_175246                       | chr4              | 124743393    | 124744043  | -218                         |
| Herpud1            | NM_022331                       | chr8              | 96909724     | 96910638   | -218                         |
| Xpnpep3            | NM_177310                       | chr15             | 81230042     | 81230757   | -218                         |
| Mief1              | NM_178719                       | chr15             | 80063964     | 80064621   | -217                         |
| Snrnp27            | NM_025665                       | chr6              | 86634410     | 86634989   | -216                         |
| Stx4a              | NM_009294                       | chr7              | 134984820    | 134985391  | -216                         |
| Trib1              | NM_144549                       | chr15             | 59479529     | 59480457   | -215                         |
| Gna11              | NM_010301                       | chr10             | 81007516     | 81008493   | -215                         |
| Tmtc4              | NM_028651                       | chr14             | 123382433    | 123382960  | -215                         |
| Cstf2t             | NM_031249                       | chr19             | 31156748     | 31157483   | -215                         |
| Rbm15              | NM_001045807                    | chr3              | 107135860    | 107136981  | -215                         |
| N4bp2l2            | NM_201369                       | chr5              | 151467978    | 151468823  | -215                         |
| Rfx1               | NM_009055                       | chr8              | 86590110     | 86590929   | -215                         |
| Mcu                | NM_001033259                    | chr10             | 59079362     | 59079944   | -214                         |
| Hdgf               | NM_008231                       | chr3              | 87709520     | 87710538   | -213                         |
| Ipo4               | NM_024267                       | chr14             | 56254406     | 56255047   | -213                         |

**Supplemental Table 2. Significant ChIP-seq E2F1 promoter peaks  
(+/- 2kb from the TSS)**

| <b>Gene Symbol</b> | <b>Refseq<br/>Transcript ID</b> | <b>Chromosome</b> | <b>Start</b> | <b>End</b> | <b>distance<br/>from TSS</b> |
|--------------------|---------------------------------|-------------------|--------------|------------|------------------------------|
| Cep131             | NM_009734                       | chr11             | 119948045    | 119948659  | -212                         |
| Gm20605            | NR_033148                       | chr5              | 138069642    | 138070636  | -211                         |
| Stx12              | NM_133887                       | chr4              | 132440220    | 132440945  | -211                         |
| Prkdc              | NM_011159                       | chr16             | 15637261     | 15638235   | -210                         |
| Mprip              | NM_012027                       | chr11             | 59475582     | 59475991   | -210                         |
| Arc                | NM_018790                       | chr15             | 74502939     | 74503478   | -210                         |
| Wnt5a              | NM_009524                       | chr14             | 29317955     | 29318945   | -208                         |
| 2310057M21Rik      | NM_026655                       | chr7              | 138506161    | 138506676  | -208                         |
| Raly               | NM_001139513                    | chr2              | 154616260    | 154617016  | -207                         |
| Amd1               | NM_009665                       | chr10             | 40021972     | 40022427   | -207                         |
| E2f5               | NM_007892                       | chr3              | 14578132     | 14578795   | -207                         |
| Tmem214            | NM_144525                       | chr5              | 31171555     | 31172071   | -206                         |
| Slc35e1            | NM_177766                       | chr8              | 75016414     | 75017022   | -206                         |
| Mterfd1            | NM_025547                       | chr13             | 67033765     | 67034660   | -206                         |
| Cnot8              | NM_026949                       | chr11             | 57917057     | 57917841   | -205                         |
| Rnf8               | NM_021419                       | chr17             | 29751134     | 29752006   | -205                         |
| Kif13b             | NM_001081177                    | chr14             | 65270898     | 65271428   | -204                         |
| U2af1              | NM_024187                       | chr17             | 31795487     | 31796315   | -203                         |
| Mphosph8           | NM_023773                       | chr14             | 57286425     | 57287338   | -203                         |
| Ccnl1              | NM_019937                       | chr3              | 65762026     | 65762671   | -203                         |
| Zdhhc24            | NM_027476                       | chr19             | 4878155      | 4878776    | -202                         |
| Ddx46              | NM_001282055                    | chr13             | 55735857     | 55736459   | -201                         |
| Rcl1               | NM_021525                       | chr19             | 29175395     | 29175934   | -200                         |
| Papd4              | NM_133905                       | chr13             | 93962091     | 93962781   | -199                         |
| Baz1b              | NM_011714                       | chr5              | 135662494    | 135663492  | -199                         |
| Wwox               | NM_019573                       | chr8              | 116963012    | 116963695  | -198                         |
| Psmc1              | NM_027357                       | chr1              | 87960601     | 87961392   | -197                         |
| Aff1               | NM_133919                       | chr5              | 104182676    | 104183291  | -197                         |
| Rab5c              | NM_024456                       | chr11             | 100599430    | 100599848  | -196                         |
| Tbc1d8b            | NM_001081499                    | chrX              | 136219121    | 136219555  | -196                         |
| Tmx1               | NM_028339                       | chr12             | 71553512     | 71554377   | -196                         |
| Josd1              | NM_028792                       | chr15             | 79518070     | 79518923   | -196                         |
| Tubb4b             | NM_146116                       | chr2              | 25079996     | 25080837   | -196                         |
| Rps27l             | NM_026467                       | chr9              | 66793293     | 66794164   | -196                         |
| Tmub2              | NM_028076                       | chr11             | 102145745    | 102146413  | -195                         |
| Zfp451             | NM_001290699                    | chr1              | 33871354     | 33871913   | -195                         |
| Prdm4              | NM_181650                       | chr10             | 85379584     | 85380182   | -194                         |
| Fam76b             | NM_176836                       | chr9              | 13631418     | 13632534   | -194                         |
| Hspa8              | NM_031165                       | chr9              | 40608624     | 40609698   | -194                         |
| Dtwd2              | NM_001170960                    | chr18             | 49915191     | 49915704   | -194                         |
| Cep55              | NM_028293                       | chr19             | 38128951     | 38129691   | -193                         |
| Prkci              | NM_008857                       | chr3              | 30894187     | 30894811   | -193                         |
| Cep112             | NM_029606                       | chr11             | 108286079    | 108286695  | -192                         |
| Smchd1             | NM_028887                       | chr17             | 71824295     | 71825453   | -192                         |
| Cox5a              | NM_007747                       | chr9              | 57368519     | 57369173   | -192                         |
| Dhx36              | NM_028136                       | chr3              | 62310886     | 62311313   | -191                         |
| Dstn               | NM_019771                       | chr2              | 143740446    | 143741306  | -190                         |
| Ddx27              | NM_153065                       | chr2              | 166840257    | 166840987  | -190                         |



**Supplemental Table 2. Significant ChIP-seq E2F1 promoter peaks  
(+/- 2kb from the TSS)**

| <b>Gene Symbol</b> | <b>Refseq<br/>Transcript ID</b> | <b>Chromosome</b> | <b>Start</b> | <b>End</b> | <b>distance<br/>from TSS</b> |
|--------------------|---------------------------------|-------------------|--------------|------------|------------------------------|
| Por                | NM_008898                       | chr5              | 136164520    | 136165269  | -189                         |
| Cnnm2              | NM_001102471                    | chr19             | 46835638     | 46836182   | -188                         |
| Srd5a1             | NM_175283                       | chr13             | 69750061     | 69750994   | -188                         |
| Hint3              | NM_025798                       | chr10             | 30338089     | 30338625   | -186                         |
| Ncoa5              | NM_144892                       | chr2              | 164860160    | 164860766  | -185                         |
| Zfp622             | NM_144523                       | chr15             | 25913634     | 25914237   | -185                         |
| Btaf1              | NM_001080706                    | chr19             | 37000029     | 37000738   | -185                         |
| Ttc14              | NM_025978                       | chr3              | 33698513     | 33699326   | -185                         |
| Manf               | NM_029103                       | chr9              | 106793798    | 106795104  | -183                         |
| H13                | NM_001159551                    | chr2              | 152494712    | 152495315  | -183                         |
| Prrc2a             | NM_001199044                    | chr17             | 35301744     | 35302261   | -182                         |
| Prmt1              | NM_019830                       | chr7              | 52241642     | 52242299   | -182                         |
| Cstf3              | NM_145529                       | chr2              | 104429965    | 104430953  | -181                         |
| Tmem260            | NM_172600                       | chr14             | 49065502     | 49066189   | -181                         |
| Spink13            | NM_001168423                    | chr18             | 62900928     | 62901513   | -181                         |
| Anp32e             | NM_001253758                    | chr3              | 95732512     | 95733485   | -181                         |
| Phrf1              | NM_001081118                    | chr7              | 148414153    | 148414858  | -181                         |
| Ksr1               | NM_013571                       | chr11             | 78959781     | 78960289   | -180                         |
| Dph3               | NR_104305                       | chr14             | 32898294     | 32899008   | -180                         |
| Fxr2               | NM_011814                       | chr11             | 69446075     | 69446511   | -179                         |
| Ttll5              | NM_001081423                    | chr12             | 87165264     | 87166176   | -179                         |
| Oaz1               | NM_008753                       | chr10             | 80288841     | 80289602   | -179                         |
| Hist1h4d           | NM_175654                       | chr13             | 23672963     | 23673620   | -179                         |
| Pcbp1              | NM_011865                       | chr6              | 86476078     | 86476595   | -179                         |
| Abhd17c            | NM_133722                       | chr7              | 91300252     | 91300909   | -179                         |
| Pias4              | NM_021501                       | chr10             | 80630335     | 80630949   | -178                         |
| Gtpbp2             | NM_019581                       | chr17             | 46297557     | 46298047   | -178                         |
| Ywhah              | NM_011738                       | chr5              | 33361119     | 33361453   | -178                         |
| Vprbp              | NM_001015507                    | chr9              | 106723603    | 106724653  | -178                         |
| Suco               | NM_172645                       | chr1              | 163806596    | 163807341  | -178                         |
| Senp2              | NM_029457                       | chr16             | 22009185     | 22009572   | -178                         |
| Fancg              | NM_053081                       | chr4              | 43023060     | 43023639   | -178                         |
| Matr3              | NM_010771                       | chr18             | 35721186     | 35722082   | -177                         |
| Aurka              | NM_001291185                    | chr2              | 172195876    | 172196616  | -177                         |
| Nxpe3              | NM_001134457                    | chr16             | 55895246     | 55895889   | -177                         |
| Cep152             | NM_001081091                    | chr2              | 125450603    | 125451446  | -177                         |
| Dda1               | NM_025600                       | chr8              | 73992706     | 73993125   | -177                         |
| Aph1c              | NM_026674                       | chr9              | 66682216     | 66683161   | -177                         |
| Obfc1              | NM_175360                       | chr19             | 47611380     | 47611990   | -176                         |
| Fasn               | NM_007988                       | chr11             | 120685634    | 120686437  | -176                         |
| Snhg12             | NR_029468                       | chr4              | 131864123    | 131864710  | -176                         |
| Atad2              | NM_027435                       | chr15             | 57966122     | 57967500   | -175                         |
| Ahcy11             | NM_145542                       | chr3              | 107499294    | 107499986  | -175                         |
| Poc1a              | NM_027354                       | chr9              | 106182345    | 106184087  | -175                         |
| Eprs               | NM_029735                       | chr1              | 187186479    | 187187118  | -175                         |
| Snrnp70            | NM_009224                       | chr7              | 52650991     | 52651390   | -175                         |
| Zc3h12c            | NM_001162921                    | chr9              | 51976205     | 51976574   | -175                         |
| Rhobtb1            | NM_001252637                    | chr10             | 68675538     | 68675996   | -174                         |

**Supplemental Table 2. Significant ChIP-seq E2F1 promoter peaks  
(+/- 2kb from the TSS)**

| <b>Gene Symbol</b> | <b>Refseq<br/>Transcript ID</b> | <b>Chromosome</b> | <b>Start</b> | <b>End</b> | <b>distance<br/>from TSS</b> |
|--------------------|---------------------------------|-------------------|--------------|------------|------------------------------|
| Fam208b            | NM_134063                       | chr13             | 3610075      | 3610979    | -174                         |
| Wdr90              | NM_001163766                    | chr17             | 25998220     | 25999046   | -174                         |
| Dennd1a            | NM_146122                       | chr2              | 38142620     | 38143534   | -174                         |
| Srsf10             | NM_001284196                    | chr4              | 135411366    | 135412256  | -174                         |
| Ube3a              | NM_173010                       | chr7              | 66483707     | 66484183   | -174                         |
| Phospho1           | NM_153104                       | chr11             | 95685271     | 95686008   | -174                         |
| MacroD1            | NM_134147                       | chr19             | 7130765      | 7131402    | -174                         |
| Uba52              | NM_019883                       | chr8              | 73034219     | 73034658   | -174                         |
| Ccna2              | NM_009828                       | chr3              | 36470682     | 36471498   | -173                         |
| Btbd8              | NM_001255991                    | chr5              | 107866298    | 107867386  | -173                         |
| Dgcr8              | NM_033324                       | chr16             | 18289108     | 18289756   | -172                         |
| Hyls1              | NM_029762                       | chr9              | 35377383     | 35378266   | -172                         |
| Tmpo               | NM_001080129                    | chr10             | 90633976     | 90635092   | -171                         |
| Tdrkh              | NM_028307                       | chr3              | 94216861     | 94217277   | -170                         |
| Hist1h3g           | NM_145073                       | chr13             | 23626746     | 23627487   | -170                         |
| Fgfr3              | NM_001163216                    | chr5              | 34064498     | 34065071   | -170                         |
| Crebl2             | NM_177687                       | chr6              | 134779765    | 134780328  | -170                         |
| Pex3               | NM_001164195                    | chr10             | 13272797     | 13273434   | -169                         |
| Glrx5              | NM_028419                       | chr12             | 106270450    | 106271009  | -169                         |
| Cbfb               | NM_001161458                    | chr8              | 107694161    | 107694648  | -169                         |
| Tcea1              | NM_001159750                    | chr1              | 4847359      | 4847853    | -168                         |
| Ror2               | NM_013846                       | chr13             | 53381491     | 53381799   | -168                         |
| Supt16             | NM_033618                       | chr14             | 52816603     | 52817559   | -168                         |
| Tigd3              | NM_198634                       | chr19             | 5893957      | 5894591    | -168                         |
| Ogt                | NM_139144                       | chrX              | 98834993     | 98835449   | -168                         |
| Mmp16              | NM_019724                       | chr4              | 17780166     | 17780755   | -168                         |
| Supt3              | NM_178652                       | chr17             | 44913401     | 44914503   | -167                         |
| Gins2              | NM_178856                       | chr8              | 123112809    | 123113473  | -167                         |
| BC052040           | NM_001145898                    | chr2              | 115407009    | 115407560  | -167                         |
| Hnrnpf             | NM_001166427                    | chr6              | 117866793    | 117867496  | -167                         |
| HnrnpII            | NM_144802                       | chr17             | 80461291     | 80462255   | -166                         |
| Slc25a25           | NM_146118                       | chr2              | 32306823     | 32307487   | -166                         |
| Rpa2               | NM_011284                       | chr4              | 132323727    | 132324489  | -166                         |
| Fkbp5              | NM_010220                       | chr17             | 28623024     | 28623492   | -165                         |
| Creb1              | NM_133828                       | chr1              | 64578948     | 64579478   | -164                         |
| Tor1aip2           | NM_172843                       | chr1              | 157882145    | 157883113  | -164                         |
| Nadk2              | NM_001286255                    | chr15             | 9000476      | 9001212    | -164                         |
| Lemd3              | NM_001081193                    | chr10             | 120416228    | 120416869  | -164                         |
| Fbxw2              | NM_001164770                    | chr2              | 34681592     | 34682242   | -163                         |
| Myef2              | NM_001162417                    | chr2              | 124949216    | 124949900  | -163                         |
| Calu               | NM_184053                       | chr6              | 29297551     | 29298333   | -163                         |
| Pelo               | NM_134058                       | chr13             | 115880215    | 115880838  | -162                         |
| Lyrn7              | NM_029327                       | chr11             | 54673980     | 54674526   | -161                         |
| Ppil1              | NM_026845                       | chr17             | 29400541     | 29401611   | -161                         |
| Ddhd2              | NM_028102                       | chr8              | 26864667     | 26865157   | -161                         |
| Taf15              | NM_027427                       | chr11             | 83286064     | 83286833   | -161                         |
| Chaf1b             | NM_028083                       | chr16             | 93883531     | 93884438   | -161                         |
| Taf6               | NM_009315                       | chr5              | 138628184    | 138628962  | -160                         |

**Supplemental Table 2. Significant ChIP-seq E2F1 promoter peaks  
(+/- 2kb from the TSS)**

| <b>Gene Symbol</b> | <b>Refseq<br/>Transcript ID</b> | <b>Chromosome</b> | <b>Start</b> | <b>End</b> | <b>distance<br/>from TSS</b> |
|--------------------|---------------------------------|-------------------|--------------|------------|------------------------------|
| 2310001K24Rik      | NR_028122                       | chr2              | 163297647    | 163298594  | -160                         |
| Casp8ap2           | NM_001122978                    | chr4              | 32701890     | 32702685   | -160                         |
| Nfatc2ip           | NM_010900                       | chr7              | 133540095    | 133540724  | -160                         |
| Nrm                | NM_134122                       | chr17             | 35997727     | 35998479   | -159                         |
| Cpd                | NM_007754                       | chr11             | 76660422     | 76660913   | -159                         |
| Zfp11              | NM_172462                       | chr5              | 130175607    | 130176634  | -159                         |
| Sel1l              | NM_011344                       | chr12             | 93087300     | 93088206   | -157                         |
| Tial1              | NM_009383                       | chr7              | 135604744    | 135605622  | -157                         |
| Mbd3               | NM_013595                       | chr10             | 79862182     | 79862576   | -156                         |
| Itrip              | NM_001001738                    | chr19             | 47993444     | 47994444   | -156                         |
| Slc16a10           | NM_001114332                    | chr10             | 39861705     | 39862724   | -156                         |
| Micall2            | NM_174850                       | chr5              | 140211964    | 140212918  | -155                         |
| Alg12              | NM_001142357                    | chr15             | 88649455     | 88650348   | -155                         |
| Slc2a6             | NM_172659                       | chr2              | 26883417     | 26883926   | -155                         |
| Abcd1              | NM_007435                       | chrX              | 70961388     | 70962173   | -155                         |
| Tango2             | NM_138583                       | chr16             | 18343828     | 18344528   | -154                         |
| Mrpl17             | NM_025301                       | chr7              | 112959411    | 112960097  | -154                         |
| Capzb              | NM_001037761                    | chr4              | 138748240    | 138749079  | -154                         |
| Dlc1               | NM_015802                       | chr8              | 37676764     | 37677535   | -154                         |
| Gtl3               | NM_008187                       | chr8              | 97958561     | 97959282   | -154                         |
| Usp28              | NM_175482                       | chr9              | 48793025     | 48793646   | -154                         |
| Zfp59              | NM_011762                       | chr7              | 28623226     | 28623672   | -153                         |
| Plk1               | NM_011121                       | chr7              | 129302429    | 129303165  | -153                         |
| Kank2              | NM_145611                       | chr9              | 21602873     | 21603411   | -153                         |
| Ptges3             | NM_019766                       | chr10             | 127495137    | 127496633  | -152                         |
| Ccnf               | NM_007634                       | chr17             | 24388024     | 24388986   | -152                         |
| Samd14             | NM_146025                       | chr11             | 94870749     | 94871332   | -152                         |
| Zc3h14             | NM_001160107                    | chr12             | 99984836     | 99985215   | -152                         |
| Nup50              | NM_016714                       | chr15             | 84753354     | 84754057   | -152                         |
| Mir219c            | NR_106154                       | chr17             | 34161511     | 34162098   | -152                         |
| Ap5z1              | NM_172725                       | chr5              | 142939348    | 142940117  | -152                         |
| Upf2               | NM_001081132                    | chr2              | 5872034      | 5872692    | -151                         |
| Scaf1              | NM_001008422                    | chr7              | 52271519     | 52272019   | -151                         |
| Cenpu              | NM_027973                       | chr8              | 47636998     | 47637544   | -151                         |
| Wsb1               | NM_019653                       | chr11             | 79067919     | 79068774   | -151                         |
| Xrcc3              | NM_028875                       | chr12             | 113051861    | 113052542  | -151                         |
| Dis3               | NM_028315                       | chr14             | 99498751     | 99499526   | -151                         |
| Klf5               | NM_009769                       | chr14             | 99697230     | 99698287   | -151                         |
| Gnb2               | NM_010312                       | chr5              | 137974273    | 137974940  | -151                         |
| Cdc25a             | NM_007658                       | chr9              | 109777401    | 109778462  | -151                         |
| Usp1l              | NM_001013378                    | chr5              | 149995615    | 149996357  | -149                         |
| Arid3a             | NM_007880                       | chr10             | 79389231     | 79390046   | -149                         |
| Cluap1             | NM_029738                       | chr16             | 3908587      | 3909132    | -149                         |
| Pcolce             | NM_008788                       | chr5              | 138052567    | 138052992  | -149                         |
| Tra2b              | NM_009186                       | chr16             | 22265602     | 22266695   | -148                         |
| Cpne2              | NM_153507                       | chr8              | 97056467     | 97057092   | -148                         |
| Setd6              | NM_001035123                    | chr8              | 98239343     | 98239986   | -148                         |
| Sept7              | NM_009859                       | chr9              | 25059525     | 25060258   | -148                         |

**Supplemental Table 2. Significant ChIP-seq E2F1 promoter peaks  
(+/- 2kb from the TSS)**

| <b>Gene Symbol</b> | <b>Refseq<br/>Transcript ID</b> | <b>Chromosome</b> | <b>Start</b> | <b>End</b> | <b>distance<br/>from TSS</b> |
|--------------------|---------------------------------|-------------------|--------------|------------|------------------------------|
| Lrfn4              | NM_153388                       | chr19             | 4615548      | 4616078    | -147                         |
| Qrich1             | NM_001114119                    | chr9              | 108418925    | 108419615  | -147                         |
| Hist1h4a           | NM_178192                       | chr13             | 23852681     | 23853846   | -147                         |
| Arl6ip6            | NM_022989                       | chr2              | 53050537     | 53051405   | -146                         |
| Ung                | NM_011677                       | chr5              | 114580662    | 114581374  | -146                         |
| Cyp39a1            | NM_001285948                    | chr17             | 43803926     | 43804423   | -146                         |
| Tex9               | NM_009359                       | chr9              | 72339573     | 72340248   | -146                         |
| Hist1h4c           | NM_178208                       | chr13             | 23790261     | 23790681   | -145                         |
| 1810043G02Rik      | NM_026431                       | chr10             | 77440970     | 77441529   | -145                         |
| Cdkn1a             | NM_007669                       | chr17             | 29230076     | 29231068   | -144                         |
| Topbp1             | NM_176979                       | chr9              | 103207347    | 103207677  | -144                         |
| Mdh1               | NM_008618                       | chr11             | 21471419     | 21472740   | -144                         |
| Slc25a37           | NM_026331                       | chr14             | 69902934     | 69903671   | -144                         |
| A630020A06         | NR_045740                       | chr15             | 3945389      | 3946401    | -143                         |
| Gm20753            | NR_040630                       | chr1              | 108067884    | 108068601  | -143                         |
| Ddost              | NM_007838                       | chr4              | 137860203    | 137860816  | -143                         |
| Esyt1              | NM_011843                       | chr10             | 127962773    | 127963338  | -142                         |
| Smc4               | NM_133786                       | chr3              | 68808305     | 68809198   | -142                         |
| Exoc4              | NM_009148                       | chr6              | 33198549     | 33199466   | -142                         |
| Nagk               | NM_019542                       | chr6              | 83744560     | 83745257   | -142                         |
| Cc2d1a             | NM_145970                       | chr8              | 86671376     | 86672209   | -142                         |
| Calr               | NM_007591                       | chr8              | 87370601     | 87371340   | -142                         |
| Usp32              | NM_001029934                    | chr11             | 84953200     | 84953992   | -140                         |
| Tmem43             | NM_028766                       | chr6              | 91423268     | 91423940   | -140                         |
| Iqgap1             | NM_016721                       | chr7              | 87948102     | 87948609   | -140                         |
| Rrs1               | NM_021511                       | chr1              | 9535133      | 9535565    | -139                         |
| Spag5              | NM_017407                       | chr11             | 78114621     | 78115285   | -139                         |
| Rprd1b             | NM_001291135                    | chr2              | 157853632    | 157854554  | -139                         |
| Coq2               | NM_027978                       | chr5              | 101103212    | 101103614  | -139                         |
| Mad11              | NM_010752                       | chr5              | 140797238    | 140798050  | -139                         |
| Far1               | NM_001285831                    | chr7              | 120656898    | 120657518  | -139                         |
| Fam122b            | NM_001166583                    | chrX              | 50622929     | 50623310   | -139                         |
| Scamp3             | NM_011886                       | chr3              | 88981029     | 88981507   | -138                         |
| Cpsf6              | NM_001013391                    | chr10             | 116813713    | 116814618  | -138                         |
| Mapk14             | NM_011951                       | chr17             | 28827697     | 28828600   | -138                         |
| Psme3              | NM_011192                       | chr11             | 101177073    | 101177782  | -137                         |
| Zfp7               | NM_145916                       | chr15             | 76709307     | 76709830   | -137                         |
| Cdk5rap2           | NM_145990                       | chr4              | 70071164     | 70071909   | -137                         |
| Diablo             | NM_023232                       | chr5              | 123973936    | 123974681  | -137                         |
| 1200014J11Rik      | NM_025818                       | chr11             | 72860995     | 72861471   | -135                         |
| Bard1              | NM_007525                       | chr1              | 71149400     | 71149959   | -135                         |
| Nucks1             | NM_001145804                    | chr1              | 133806635    | 133807165  | -134                         |
| Pigm               | NM_026234                       | chr1              | 174306205    | 174306849  | -134                         |
| Map3k2             | NM_011946                       | chr18             | 32322422     | 32322794   | -134                         |
| Uhrf2              | NM_144873                       | chr19             | 30104547     | 30105189   | -134                         |
| Pdrg1              | NM_178939                       | chr2              | 152840913    | 152841591  | -134                         |
| Zfp689             | NM_175163                       | chr7              | 134592597    | 134593013  | -134                         |
| Fyn                | NM_008054                       | chr10             | 39089292     | 39089649   | -134                         |

**Supplemental Table 2. Significant ChIP-seq E2F1 promoter peaks  
(+/- 2kb from the TSS)**

| <b>Gene Symbol</b> | <b>Refseq<br/>Transcript ID</b> | <b>Chromosome</b> | <b>Start</b> | <b>End</b> | <b>distance<br/>from TSS</b> |
|--------------------|---------------------------------|-------------------|--------------|------------|------------------------------|
| Fam86              | NM_027446                       | chr16             | 5255869      | 5256494    | -134                         |
| Rmi2               | NM_001162932                    | chr16             | 10834648     | 10835387   | -134                         |
| Nfe2l2             | NM_010902                       | chr2              | 75542515     | 75543146   | -134                         |
| Pars2              | NM_001285783                    | chr4              | 106323003    | 106324077  | -133                         |
| Gpbp11             | NM_029868                       | chr4              | 116229754    | 116230642  | -133                         |
| Slc7a1             | NM_007513                       | chr5              | 149211266    | 149211958  | -133                         |
| B3gnt2             | NM_016888                       | chr11             | 22759651     | 22760082   | -133                         |
| Trappc6a           | NM_025960                       | chr7              | 20093603     | 20094286   | -133                         |
| Sc5d               | NM_172769                       | chr9              | 42072198     | 42072831   | -133                         |
| Cenpm              | NM_001080158                    | chr15             | 82074376     | 82075418   | -132                         |
| Birc6              | NM_007566                       | chr17             | 74927127     | 74927878   | -132                         |
| Rragc              | NM_017475                       | chr4              | 123594155    | 123594932  | -132                         |
| Nktr               | NM_010918                       | chr9              | 121627939    | 121628394  | -132                         |
| Elmo2              | NM_207706                       | chr2              | 165151506    | 165152712  | -131                         |
| 1700012D14Rik      | NR_015573                       | chr7              | 118266006    | 118266632  | -131                         |
| St3gal1            | NM_009177                       | chr15             | 67008271     | 67008876   | -131                         |
| Morn1              | NM_001081100                    | chr4              | 154460211    | 154460898  | -131                         |
| Specc11            | NM_153406                       | chr10             | 74674517     | 74674857   | -130                         |
| Stom               | NM_013515                       | chr2              | 35192420     | 35192896   | -130                         |
| Hnrnp2             | NM_019868                       | chrX              | 131135424    | 131135964  | -130                         |
| Gm14634            | NR_045852                       | chrX              | 12338831     | 12339717   | -129                         |
| Apoo               | NM_026673                       | chrX              | 91612065     | 91612573   | -129                         |
| Larp4b             | NM_172585                       | chr13             | 9092748      | 9093295    | -129                         |
| Suds3              | NM_001122666                    | chr5              | 117565813    | 117566446  | -129                         |
| Rwdd1              | NM_025614                       | chr10             | 33739307     | 33739791   | -128                         |
| Esp1               | NM_001014976                    | chr15             | 102125955    | 102127235  | -128                         |
| Dnajc30            | NM_025362                       | chr5              | 135539551    | 135540343  | -128                         |
| Arrb2              | NM_145429                       | chr11             | 70245491     | 70246416   | -128                         |
| Vash2              | NR_027352                       | chr1              | 192803023    | 192803579  | -127                         |
| Inpp5k             | NM_008916                       | chr11             | 75444179     | 75444609   | -127                         |
| Nutf2              | NM_026532                       | chr8              | 108384028    | 108384784  | -127                         |
| Ranbp2             | NM_011240                       | chr10             | 57909057     | 57909888   | -127                         |
| Fdxr               | NM_007997                       | chr11             | 115138131    | 115138686  | -127                         |
| Rad21              | NM_009009                       | chr15             | 51823090     | 51823773   | -127                         |
| Ugp2               | NM_001290634                    | chr11             | 21271165     | 21271625   | -126                         |
| Phf23              | NM_030064                       | chr11             | 69808807     | 69809475   | -126                         |
| Gart               | NM_010256                       | chr16             | 91647050     | 91647633   | -126                         |
| Snai2              | NM_011415                       | chr16             | 14705470     | 14706182   | -125                         |
| Cep85              | NM_144527                       | chr4              | 133742624    | 133743624  | -125                         |
| Wdr48              | NM_026236                       | chr9              | 119803660    | 119804114  | -125                         |
| Mms19              | NM_028152                       | chr19             | 42055351     | 42056148   | -125                         |
| Cenpf              | NM_001081363                    | chr1              | 191511775    | 191512401  | -124                         |
| Trim24             | NM_001272064                    | chr6              | 37820334     | 37821038   | -124                         |
| Ticrr              | NM_029835                       | chr7              | 86804579     | 86805335   | -124                         |
| Ltv1               | NM_181470                       | chr10             | 12912850     | 12913281   | -124                         |
| Gpr180             | NM_021434                       | chr14             | 118535835    | 118536614  | -124                         |
| Prpsap1            | NM_026364                       | chr11             | 116351572    | 116351992  | -123                         |
| Mapre1             | NM_007896                       | chr2              | 153566587    | 153567211  | -123                         |

**Supplemental Table 2. Significant ChIP-seq E2F1 promoter peaks  
(+/- 2kb from the TSS)**

| <b>Gene Symbol</b> | <b>Refseq<br/>Transcript ID</b> | <b>Chromosome</b> | <b>Start</b> | <b>End</b> | <b>distance<br/>from TSS</b> |
|--------------------|---------------------------------|-------------------|--------------|------------|------------------------------|
| Zfp280b            | NM_177475                       | chr10             | 75494817     | 75495650   | -123                         |
| Timp2              | NM_011594                       | chr11             | 118216573    | 118217120  | -123                         |
| Myo1c              | NM_008659                       | chr11             | 75464436     | 75465341   | -122                         |
| Pik3c3             | NM_181414                       | chr18             | 30432284     | 30432572   | -121                         |
| Zbtb3              | NM_133759                       | chr19             | 8876599      | 8877129    | -121                         |
| Tbc1d1             | NM_019636                       | chr5              | 64551083     | 64551671   | -121                         |
| Lbr                | NM_133815                       | chr1              | 183772345    | 183772958  | -121                         |
| Wee1               | NM_009516                       | chr7              | 117264895    | 117266008  | -121                         |
| Aamp               | NM_001190444                    | chr1              | 74330978     | 74331884   | -120                         |
| Polg               | NM_017462                       | chr7              | 86610997     | 86611559   | -120                         |
| Tsnaxip1           | NM_024445                       | chr8              | 108351180    | 108351866  | -120                         |
| Rpl10              | NM_052835                       | chrX              | 71515709     | 71516359   | -120                         |
| P4hb               | NM_011032                       | chr11             | 120434101    | 120434636  | -120                         |
| Rpl35a             | NM_001130485                    | chr16             | 33055938     | 33056899   | -120                         |
| Wwtr1              | NM_001168281                    | chr3              | 57379574     | 57380327   | -120                         |
| Klhl21             | NM_001033352                    | chr4              | 151382609    | 151383151  | -119                         |
| Cdca4              | NM_028023                       | chr12             | 114067430    | 114068005  | -119                         |
| Pak4               | NM_027470                       | chr7              | 29383071     | 29383570   | -119                         |
| Gtf2e2             | NM_001167921                    | chr8              | 34841970     | 34842563   | -119                         |
| Suz12              | NM_001163018                    | chr11             | 79806117     | 79806861   | -118                         |
| Cdc6               | NM_001025779                    | chr11             | 98768801     | 98769368   | -118                         |
| Zmiz1              | NM_183208                       | chr14             | 26278337     | 26278768   | -118                         |
| Ezr                | NM_009510                       | chr17             | 6986774      | 6987717    | -118                         |
| Actl6a             | NM_019673                       | chr3              | 32607006     | 32607693   | -118                         |
| Cdc37              | NM_016742                       | chr9              | 20954175     | 20954758   | -118                         |
| 9630033F20Rik      | NM_177003                       | chr6              | 127059453    | 127059919  | -117                         |
| Rpgrip1l           | NM_173431                       | chr8              | 93836773     | 93837701   | -117                         |
| Acsl3              | NM_001033606                    | chr1              | 78653851     | 78654714   | -117                         |
| Zfp706             | NM_026521                       | chr15             | 36937048     | 36937497   | -117                         |
| Slc33a1            | NM_015728                       | chr3              | 63768286     | 63769255   | -117                         |
| Naa10              | NM_019870                       | chrX              | 71167207     | 71167590   | -117                         |
| Strip2             | NM_001037740                    | chr6              | 29866462     | 29867330   | -116                         |
| Taok1              | NM_144825                       | chr11             | 77421137     | 77421726   | -116                         |
| Ppp1cc             | NM_013636                       | chr5              | 122607897    | 122608446  | -116                         |
| Dnajc13            | NM_001163026                    | chr9              | 104164996    | 104165753  | -116                         |
| Suv39h2            | NM_022724                       | chr2              | 3392149      | 3392595    | -115                         |
| Rps3a1             | NM_016959                       | chr3              | 85946373     | 85947035   | -115                         |
| Tubg1              | NM_134024                       | chr11             | 100981061    | 100981598  | -115                         |
| Thumpd2            | NM_028138                       | chr17             | 81464219     | 81464858   | -115                         |
| Tctn3              | NM_026260                       | chr19             | 40686535     | 40687102   | -115                         |
| Cdk4               | NM_009870                       | chr10             | 126499940    | 126501148  | -114                         |
| Snord104           | NR_030703                       | chr11             | 106361743    | 106362638  | -114                         |
| Rsrp1              | NM_023665                       | chr4              | 134479251    | 134479600  | -114                         |
| 9430015G10Rik      | NM_145557                       | chr4              | 155483720    | 155484265  | -114                         |
| Bbs7               | NM_027810                       | chr3              | 36512128     | 36512718   | -113                         |
| Dnmt1              | NM_001199433                    | chr9              | 20756810     | 20757548   | -113                         |
| Slc25a5            | NM_007451                       | chrX              | 34335224     | 34335842   | -113                         |
| Ppia               | NM_008907                       | chr11             | 6315477      | 6316042    | -113                         |

**Supplemental Table 2. Significant ChIP-seq E2F1 promoter peaks  
(+/- 2kb from the TSS)**

| <b>Gene Symbol</b> | <b>Refseq<br/>Transcript ID</b> | <b>Chromosome</b> | <b>Start</b> | <b>End</b> | <b>distance<br/>from TSS</b> |
|--------------------|---------------------------------|-------------------|--------------|------------|------------------------------|
| Tnfrsf18           | NM_025566                       | chr17             | 56301524     | 56302077   | -113                         |
| Ccng2              | NM_007635                       | chr5              | 93696082     | 93696889   | -113                         |
| Zfp9               | NM_011763                       | chr6              | 118429128    | 118429677  | -113                         |
| Kif23              | NM_024245                       | chr9              | 61794264     | 61795171   | -113                         |
| Rc3h1              | NM_001024952                    | chr1              | 162836152    | 162836707  | -112                         |
| Ctsd               | NM_009983                       | chr7              | 149573700    | 149574071  | -112                         |
| Morf4l2            | NM_001168229                    | chrX              | 133275810    | 133276193  | -112                         |
| Pdxp               | NM_020271                       | chr15             | 78744054     | 78744420   | -111                         |
| Fam98b             | NM_026620                       | chr2              | 117074929    | 117075797  | -111                         |
| Kif24              | NM_024241                       | chr4              | 41411639     | 41412343   | -111                         |
| Adam10             | NM_007399                       | chr9              | 70526346     | 70527048   | -110                         |
| Rtkn2              | NM_001081346                    | chr10             | 67441772     | 67442699   | -110                         |
| Rad17              | NM_001283011                    | chr13             | 101420737    | 101421512  | -110                         |
| Snd1               | NM_019776                       | chr6              | 28429920     | 28430555   | -110                         |
| Ccdc130            | NM_026350                       | chr8              | 86794137     | 86794682   | -110                         |
| Nupl1              | NM_170591                       | chr14             | 60869886     | 60870760   | -109                         |
| Rad51ap1           | NM_009013                       | chr6              | 126889101    | 126890261  | -109                         |
| Ppp3r1             | NM_024459                       | chr11             | 17058896     | 17059487   | -109                         |
| Nup85              | NM_001002929                    | chr11             | 115425009    | 115426288  | -109                         |
| Gtf2b              | NM_145546                       | chr3              | 142427890    | 142428313  | -109                         |
| Arhgap24           | NM_029270                       | chr5              | 102910046    | 102910555  | -109                         |
| Ttc16              | NM_001290564                    | chr2              | 32630699     | 32631233   | -108                         |
| Pank2              | NM_153501                       | chr2              | 131087880    | 131088374  | -108                         |
| Rps20              | NM_026147                       | chr4              | 3762411      | 3763297    | -108                         |
| Megf9              | NM_172694                       | chr4              | 70195845     | 70196293   | -108                         |
| 2700038G22Rik      | NR_045042                       | chr5              | 23356135     | 23356477   | -108                         |
| Mrpl10             | NM_026154                       | chr11             | 96902479     | 96903104   | -108                         |
| Zmynd19            | NM_026021                       | chr2              | 24805016     | 24805411   | -108                         |
| Mbd5               | NM_029924                       | chr2              | 48804728     | 48805111   | -108                         |
| E2f1               | NM_007891                       | chr2              | 154395235    | 154396234  | -108                         |
| Cks1b              | NM_016904                       | chr3              | 89221989     | 89222650   | -108                         |
| Sf3b3              | NM_133953                       | chr8              | 113370460    | 113371159  | -108                         |
| Lca5               | NM_029434                       | chr9              | 83334530     | 83335151   | -108                         |
| Tbccd1             | NM_001081368                    | chr16             | 22857505     | 22857991   | -107                         |
| Rpl3               | NM_013762                       | chr15             | 79913671     | 79914212   | -107                         |
| Pomt2              | NM_153415                       | chr12             | 88488649     | 88489265   | -106                         |
| Adk                | NM_001243041                    | chr14             | 21894878     | 21895656   | -106                         |
| Myh9               | NM_022410                       | chr15             | 77672044     | 77673376   | -106                         |
| Axin1              | NM_009733                       | chr17             | 26275179     | 26275869   | -106                         |
| Prr14l             | NM_194340                       | chr5              | 33196803     | 33197165   | -106                         |
| Polr2a             | NM_001291068                    | chr11             | 69572044     | 69572434   | -105                         |
| 9330151L19Rik      | NR_033222                       | chr12             | 70297922     | 70298262   | -105                         |
| Hmgb2              | NM_008252                       | chr8              | 59989916     | 59991152   | -105                         |
| Lnp                | NM_027133                       | chr2              | 74416600     | 74417617   | -105                         |
| Cenpi              | NM_145924                       | chrX              | 130842289    | 130842904  | -105                         |
| Ppwd1              | NM_172807                       | chr13             | 105018541    | 105019513  | -104                         |
| Wdr89              | NM_028203                       | chr12             | 76770125     | 76771128   | -104                         |
| Lrrfip1            | NM_008515                       | chr1              | 92949296     | 92950539   | -103                         |

**Supplemental Table 2. Significant ChIP-seq E2F1 promoter peaks  
(+/- 2kb from the TSS)**

| <b>Gene Symbol</b> | <b>Refseq<br/>Transcript ID</b> | <b>Chromosome</b> | <b>Start</b> | <b>End</b> | <b>distance<br/>from TSS</b> |
|--------------------|---------------------------------|-------------------|--------------|------------|------------------------------|
| Prkca              | NM_011101                       | chr11             | 108205020    | 108205587  | -103                         |
| Nup155             | NM_133227                       | chr15             | 8058909      | 8059510    | -103                         |
| Zfyve1             | NM_183154                       | chr12             | 84937918     | 84938477   | -102                         |
| 4930427A07Rik      | NM_134041                       | chr12             | 114394244    | 114394815  | -102                         |
| Fads1              | NM_146094                       | chr19             | 10256954     | 10257598   | -101                         |
| Nup214             | NM_172268                       | chr2              | 31829382     | 31830354   | -101                         |
| Wdr20              | NM_027149                       | chr12             | 111975818    | 111976297  | -101                         |
| Cdca7l             | NM_146040                       | chr12             | 119081806    | 119082659  | -101                         |
| Bub1b              | NM_009773                       | chr2              | 118423523    | 118424168  | -101                         |
| Sfpq               | NR_045010                       | chr4              | 126698166    | 126698721  | -101                         |
| Dnajc8             | NM_172400                       | chr4              | 132090972    | 132091774  | -100                         |
| Fhod1              | NM_177699                       | chr8              | 107871434    | 107872504  | -100                         |
| Hnrnpa2b1          | NM_016806                       | chr6              | 51419492     | 51420491   | -100                         |
| Pelp1              | NM_029231                       | chr11             | 70223242     | 70224020   | -99                          |
| Pdia5              | NM_028295                       | chr16             | 35490656     | 35491458   | -99                          |
| Spc25              | NM_025565                       | chr2              | 69043912     | 69044778   | -99                          |
| Nfyb               | NM_010914                       | chr10             | 82226773     | 82227194   | -99                          |
| Fam64a             | NM_144526                       | chr11             | 71855563     | 71856246   | -99                          |
| Tmem216            | NM_001277861                    | chr19             | 10629972     | 10630729   | -99                          |
| Ehd4               | NM_133838                       | chr2              | 119980080    | 119980737  | -99                          |
| Nup133             | NM_172288                       | chr8              | 126473009    | 126473516  | -99                          |
| Trp53inp2          | NM_178111                       | chr2              | 155207281    | 155207705  | -98                          |
| Sf1                | NM_001110791                    | chr19             | 6363273      | 6363910    | -98                          |
| Pdap1              | NM_001033313                    | chr5              | 145900746    | 145901363  | -98                          |
| Dpy19l4            | NM_001081201                    | chr4              | 11249048     | 11249700   | -97                          |
| Fbxw8              | NM_172721                       | chr5              | 118605311    | 118605815  | -97                          |
| Hps5               | NM_001167864                    | chr7              | 54051017     | 54051677   | -97                          |
| Arf1               | NM_007476                       | chr11             | 59041595     | 59042134   | -97                          |
| Zfr                | NM_011767                       | chr15             | 12047236     | 12047781   | -97                          |
| Frg1               | NM_013522                       | chr8              | 42502191     | 42502944   | -97                          |
| Tmem109            | NM_134142                       | chr19             | 10956065     | 10956591   | -96                          |
| Cdk1               | NM_007659                       | chr10             | 68815505     | 68816004   | -96                          |
| Alg8               | NM_199035                       | chr7              | 104519506    | 104520555  | -96                          |
| H2afx              | NM_010436                       | chr9              | 44142351     | 44143053   | -95                          |
| Glb1               | NM_009752                       | chr9              | 114309781    | 114310419  | -95                          |
| Mpv17l2            | NM_183170                       | chr8              | 73284535     | 73285292   | -95                          |
| Heatr3             | NM_172757                       | chr8              | 90661426     | 90661951   | -95                          |
| Fancm              | NM_178912                       | chr12             | 66176176     | 66176820   | -94                          |
| Sf3b2              | NM_030109                       | chr19             | 5295039      | 5296057    | -94                          |
| Pip5k1a            | NM_001293707                    | chr3              | 94910716     | 94911173   | -94                          |
| Uck2               | NM_030724                       | chr1              | 169215043    | 169215657  | -93                          |
| Eif4a2             | NM_001123038                    | chr16             | 23106916     | 23107978   | -93                          |
| lfrd2              | NM_025903                       | chr9              | 107489530    | 107490380  | -93                          |
| Zfp574             | NM_001168506                    | chr7              | 25861896     | 25862365   | -93                          |
| Ylpm1              | NM_178363                       | chr12             | 86336941     | 86337415   | -92                          |
| Zfand2a            | NM_001159908                    | chr5              | 139960316    | 139960755  | -92                          |
| Mrpl12             | NM_027204                       | chr11             | 120345573    | 120346210  | -91                          |
| Pafah2             | NM_133880                       | chr4              | 133951873    | 133952414  | -91                          |



**Supplemental Table 2. Significant ChIP-seq E2F1 promoter peaks  
(+/- 2kb from the TSS)**

| <b>Gene Symbol</b> | <b>Refseq<br/>Transcript ID</b> | <b>Chromosome</b> | <b>Start</b> | <b>End</b> | <b>distance<br/>from TSS</b> |
|--------------------|---------------------------------|-------------------|--------------|------------|------------------------------|
| Mkrn2              | NM_023290                       | chr6              | 115551569    | 115552160  | -91                          |
| Stra13             | NM_016665                       | chr11             | 120574708    | 120575632  | -90                          |
| Rfc5               | NM_028128                       | chr5              | 117838903    | 117839339  | -90                          |
| Ccp110             | NM_182995                       | chr7              | 125855833    | 125856235  | -90                          |
| Rpsa               | NM_011029                       | chr9              | 120036306    | 120037280  | -90                          |
| Sec63              | NM_153055                       | chr10             | 42480953     | 42481470   | -90                          |
| Zdhhc12            | NM_025428                       | chr2              | 29949043     | 29949444   | -90                          |
| Sp3                | NM_001018042                    | chr2              | 72818114     | 72819069   | -90                          |
| Ttf2               | NM_001013026                    | chr3              | 100773361    | 100773988  | -90                          |
| Mcm5               | NM_008566                       | chr8              | 77632770     | 77633903   | -90                          |
| Lactb              | NM_030717                       | chr9              | 66823096     | 66823663   | -90                          |
| Ncapg2             | NM_133762                       | chr12             | 117643453    | 117644117  | -89                          |
| Nolc1              | NM_053086                       | chr19             | 46149832     | 46150663   | -89                          |
| Nipsnap3b          | NM_025623                       | chr4              | 53024401     | 53025012   | -89                          |
| Exosc6             | NM_028274                       | chr8              | 113579934    | 113580365  | -89                          |
| 1600023N17Rik      | NR_073433                       | chr5              | 46060570     | 46061498   | -88                          |
| Wdr82              | NM_029896                       | chr9              | 106072864    | 106073478  | -88                          |
| Cluh               | NM_001081158                    | chr11             | 74462673     | 74463144   | -88                          |
| Tfrc               | NM_011638                       | chr16             | 32608594     | 32609193   | -88                          |
| Tcf19              | NM_001163764                    | chr17             | 35653261     | 35654450   | -88                          |
| Blvra              | NM_026678                       | chr2              | 126895832    | 126896777  | -88                          |
| Rngtt              | NM_011884                       | chr4              | 33396847     | 33397548   | -88                          |
| Akap11             | NM_001164503                    | chr14             | 78936373     | 78937133   | -87                          |
| Ncoa7              | NM_172495                       | chr10             | 30522761     | 30523236   | -87                          |
| Nedd1              | NM_008682                       | chr10             | 92184792     | 92185705   | -87                          |
| Hnrnpab            | NM_010448                       | chr11             | 51420226     | 51420711   | -87                          |
| Mzf1               | NM_001290453                    | chr7              | 13640016     | 13640381   | -87                          |
| C230052I12Rik      | NM_178643                       | chr7              | 36181573     | 36182169   | -86                          |
| Crkl               | NM_001277231                    | chr16             | 17451661     | 17452322   | -86                          |
| 1110020A21Rik      | NR_027930                       | chr17             | 85356865     | 85357404   | -86                          |
| Cds2               | NM_138651                       | chr2              | 132088358    | 132089237  | -86                          |
| Sptssa             | NM_134054                       | chr12             | 55757268     | 55758018   | -85                          |
| Hsp90aa1           | NM_010480                       | chr12             | 111934335    | 111935042  | -85                          |
| Mlf1               | NM_010801                       | chr3              | 67177624     | 67178243   | -85                          |
| Kansl3             | NM_172652                       | chr1              | 36425843     | 36426375   | -84                          |
| B230219D22Rik      | NM_181278                       | chr13             | 55793921     | 55794880   | -84                          |
| Cnpy3              | NM_028065                       | chr17             | 46888606     | 46889881   | -84                          |
| Zc3h18             | NM_001029994                    | chr8              | 124900263    | 124900600  | -84                          |
| lpo11              | NM_029665                       | chr13             | 107726819    | 107727335  | -83                          |
| Sgol1              | NM_028232                       | chr17             | 53828315     | 53829129   | -83                          |
| Cox8a              | NM_007750                       | chr19             | 7291792      | 7292584    | -83                          |
| Prpf19             | NM_134129                       | chr19             | 10969452     | 10969822   | -83                          |
| Clsn               | NM_175554                       | chr4              | 126233618    | 126234662  | -83                          |
| Rpia               | NM_009075                       | chr6              | 70741792     | 70742710   | -83                          |
| Rad54l             | NM_001122959                    | chr4              | 115796135    | 115796617  | -82                          |
| Nek4               | NM_011849                       | chr14             | 31764281     | 31764902   | -82                          |
| Cdca5              | NM_026410                       | chr19             | 6084736      | 6085293    | -82                          |
| Tmem50b            | NM_030018                       | chr16             | 91597774     | 91598236   | -81                          |

**Supplemental Table 2. Significant ChIP-seq E2F1 promoter peaks  
(+/- 2kb from the TSS)**

| <b>Gene Symbol</b> | <b>Refseq<br/>Transcript ID</b> | <b>Chromosome</b> | <b>Start</b> | <b>End</b> | <b>distance<br/>from TSS</b> |
|--------------------|---------------------------------|-------------------|--------------|------------|------------------------------|
| Zc3h6              | NM_178404                       | chr2              | 128792751    | 128793361  | -81                          |
| Klhl18             | NM_177771                       | chr9              | 110379052    | 110379504  | -81                          |
| 3110082I17Rik      | NM_028469                       | chr5              | 139936302    | 139936833  | -81                          |
| Ewsr1              | NM_007968                       | chr11             | 4998779      | 4999561    | -80                          |
| Mrps17             | NM_025450                       | chr5              | 130221170    | 130221474  | -80                          |
| Nap1l4             | NM_001285489                    | chr7              | 150734852    | 150735356  | -80                          |
| Kdm6a              | NM_009483                       | chrX              | 17739396     | 17740028   | -80                          |
| Mapk9              | NM_016961                       | chr11             | 49659823     | 49660522   | -80                          |
| Gchfr              | NM_177157                       | chr2              | 118993220    | 118993667  | -80                          |
| Abhd2              | NM_018811                       | chr7              | 86417783     | 86418360   | -80                          |
| Lpar2              | NM_020028                       | chr8              | 72346060     | 72346707   | -80                          |
| Gtf2h4             | NM_010364                       | chr17             | 35810483     | 35810927   | -79                          |
| 2700029M09Rik      | NM_028299                       | chr8              | 63368869     | 63369467   | -79                          |
| Smarcc1            | NM_009211                       | chr9              | 110034090    | 110034808  | -78                          |
| Zfp143             | NM_009281                       | chr7              | 117204644    | 117205631  | -78                          |
| Micu1              | NM_001291442                    | chr10             | 59164893     | 59165573   | -77                          |
| 2410006H16Rik      | NR_030738                       | chr11             | 62415982     | 62416620   | -77                          |
| Gfod1              | NM_001033399                    | chr13             | 43399416     | 43399818   | -77                          |
| Gadd45g            | NM_011817                       | chr13             | 51941601     | 51942331   | -77                          |
| Mapk1ip1l          | NM_178684                       | chr14             | 47917614     | 47918208   | -77                          |
| Cdh24              | NM_199470                       | chr14             | 55260063     | 55260490   | -77                          |
| Ltn1               | NM_001081068                    | chr16             | 87432475     | 87433378   | -77                          |
| Plekhf2            | NM_175175                       | chr4              | 10934483     | 10935200   | -77                          |
| Ets1               | NM_001038642                    | chr9              | 32503138     | 32503961   | -77                          |
| Tuba1a             | NM_011653                       | chr15             | 98783575     | 98784437   | -75                          |
| Sssca1             | NM_020491                       | chr19             | 5731576      | 5732036    | -75                          |
| Slc4a1ap           | NM_009206                       | chr5              | 31828832     | 31829752   | -75                          |
| Arf6               | NM_007481                       | chr12             | 70472768     | 70473355   | -75                          |
| Cenpp              | NM_025495                       | chr13             | 49747936     | 49748411   | -75                          |
| Fbxl6              | NM_013909                       | chr15             | 76368908     | 76369591   | -75                          |
| Cers5              | NM_028015                       | chr15             | 99602786     | 99603253   | -75                          |
| Fscn1              | NM_007984                       | chr5              | 143721741    | 143722177  | -74                          |
| Dopey2             | NM_027293                       | chr16             | 93711796     | 93712359   | -74                          |
| Coro1b             | NM_011778                       | chr19             | 4148419      | 4148758    | -74                          |
| Hells              | NM_008234                       | chr19             | 39005255     | 39005556   | -74                          |
| Alms1              | NM_145223                       | chr6              | 85537255     | 85537646   | -74                          |
| Papola             | NM_011112                       | chr12             | 107022524    | 107023152  | -73                          |
| Oip5               | NM_001042653                    | chr2              | 119444034    | 119444591  | -73                          |
| Lpar1              | NM_010336                       | chr4              | 58566093     | 58566776   | -73                          |
| Hat1               | NM_026115                       | chr2              | 71226693     | 71227795   | -72                          |
| St3gal3            | NM_009176                       | chr4              | 117807391    | 117807853  | -72                          |
| Gipc1              | NM_018771                       | chr8              | 86176121     | 86176887   | -72                          |
| Mon2               | NM_001163025                    | chr10             | 122513312    | 122513951  | -72                          |
| Nop56              | NM_024193                       | chr2              | 130099743    | 130100408  | -72                          |
| Rapgef6            | NM_001252494                    | chr11             | 54335972     | 54336578   | -71                          |
| Tpk1               | NM_013861                       | chr6              | 43615916     | 43616572   | -71                          |
| Eif3k              | NM_028659                       | chr7              | 29766793     | 29767161   | -71                          |
| B4galt7            | NM_146045                       | chr13             | 55701012     | 55701789   | -71                          |

**Supplemental Table 2. Significant ChIP-seq E2F1 promoter peaks  
(+/- 2kb from the TSS)**

| <b>Gene Symbol</b> | <b>Refseq<br/>Transcript ID</b> | <b>Chromosome</b> | <b>Start</b> | <b>End</b> | <b>distance<br/>from TSS</b> |
|--------------------|---------------------------------|-------------------|--------------|------------|------------------------------|
| S1pr2              | NM_010333                       | chr9              | 20780715     | 20781898   | -71                          |
| 4933433G15Rik      | NR_040719                       | chr9              | 75257576     | 75258263   | -71                          |
| Snx3               | NM_017472                       | chr10             | 42221319     | 42222259   | -70                          |
| Numb               | NR_073563                       | chr12             | 85262687     | 85263219   | -70                          |
| Ccno               | NM_001081062                    | chr13             | 113777511    | 113778367  | -70                          |
| Fam118a            | NM_133750                       | chr15             | 84866915     | 84867927   | -70                          |
| Stk35              | NM_183262                       | chr2              | 129625958    | 129626406  | -70                          |
| Alg14              | NM_024178                       | chr3              | 120994419    | 120994909  | -70                          |
| Cdc42              | NM_009861                       | chr4              | 136913570    | 136913915  | -70                          |
| Fanca              | NM_016925                       | chr8              | 125842188    | 125842901  | -70                          |
| Them4              | NM_029431                       | chr3              | 94113706     | 94114263   | -69                          |
| Plekha1            | NM_133942                       | chr7              | 138009098    | 138009611  | -69                          |
| Rtn4               | NM_194054                       | chr11             | 29592414     | 29593244   | -68                          |
| Cnot1              | NM_001205226                    | chr8              | 98330951     | 98331907   | -68                          |
| Glyr1              | NM_028720                       | chr16             | 5049785      | 5050354    | -68                          |
| Rint1              | NM_177323                       | chr5              | 23293160     | 23293827   | -68                          |
| Lpcat3             | NM_145130                       | chr6              | 124612787    | 124613320  | -68                          |
| Bambi              | NM_026505                       | chr18             | 3507562      | 3508213    | -67                          |
| Paxip1             | NM_018878                       | chr5              | 28117884     | 28118427   | -67                          |
| Ostf1              | NM_017375                       | chr19             | 18706136     | 18706600   | -66                          |
| Tcerg1             | NM_001289526                    | chr18             | 42670767     | 42671382   | -66                          |
| Zgrf1              | NM_197997                       | chr3              | 127255878    | 127256803  | -66                          |
| Syne3              | NM_172500                       | chr12             | 106247870    | 106248296  | -65                          |
| Ptplb              | NM_023587                       | chr16             | 35022046     | 35022836   | -65                          |
| Mid1ip1            | NM_026524                       | chrX              | 10293916     | 10294934   | -65                          |
| Brca2              | NM_009765                       | chr5              | 151324681    | 151325580  | -65                          |
| Mbd4               | NM_010774                       | chr6              | 115802924    | 115803921  | -65                          |
| Mrps9              | NM_023514                       | chr1              | 42907719     | 42908308   | -64                          |
| Smarcd2            | NM_001130187                    | chr11             | 106133975    | 106134722  | -64                          |
| Ccdc97             | NM_028771                       | chr7              | 26503924     | 26504345   | -64                          |
| Spsb3              | NM_001163750                    | chr17             | 25023108     | 25024002   | -63                          |
| Zfyve19            | NM_001164827                    | chr2              | 119033857    | 119034927  | -63                          |
| Helq               | NM_001081107                    | chr5              | 101227408    | 101227954  | -63                          |
| Fam192a            | NM_028221                       | chr8              | 97125301     | 97126075   | -63                          |
| Stard4             | NM_133774                       | chr18             | 33373307     | 33373756   | -63                          |
| Bub1               | NM_009772                       | chr2              | 127657244    | 127658069  | -63                          |
| Hist1h3c           | NM_175653                       | chr13             | 23837205     | 23837697   | -62                          |
| Pbk                | NM_023209                       | chr14             | 66424240     | 66425130   | -62                          |
| Ppm1g              | NM_008014                       | chr5              | 31522725     | 31523233   | -62                          |
| Prr11              | NM_175563                       | chr11             | 86921851     | 86922702   | -62                          |
| Map1lc3a           | NM_025735                       | chr2              | 155101800    | 155102275  | -62                          |
| Fan1               | NM_177893                       | chr7              | 71518790     | 71519293   | -62                          |
| Dcaf15             | NM_172502                       | chr8              | 86628505     | 86628938   | -62                          |
| Rqcd1              | NM_021383                       | chr1              | 74551857     | 74553287   | -61                          |
| Zfp763             | NM_028543                       | chr17             | 33170150     | 33170622   | -61                          |
| 4930465K10Rik      | NR_027978                       | chr18             | 77952619     | 77953103   | -61                          |
| Msmo1              | NM_025436                       | chr8              | 67212249     | 67212621   | -61                          |
| Dock7              | NM_026082                       | chr4              | 98787505     | 98787826   | -61                          |

**Supplemental Table 2. Significant ChIP-seq E2F1 promoter peaks  
(+/- 2kb from the TSS)**

| <b>Gene Symbol</b> | <b>Refseq<br/>Transcript ID</b> | <b>Chromosome</b> | <b>Start</b> | <b>End</b> | <b>distance<br/>from TSS</b> |
|--------------------|---------------------------------|-------------------|--------------|------------|------------------------------|
| 2610002J02Rik      | NM_001190445                    | chr4              | 154623469    | 154624558  | -61                          |
| Sh2b2              | NM_018825                       | chr5              | 136720569    | 136721096  | -61                          |
| 4632427E13Rik      | NR_015510                       | chr7              | 99889599     | 99890458   | -61                          |
| Dap3               | NM_001164533                    | chr3              | 88753978     | 88754548   | -60                          |
| Wbscr17            | NM_145218                       | chr5              | 131782686    | 131784216  | -60                          |
| Tex30              | NM_029368                       | chr1              | 44159000     | 44159583   | -60                          |
| 1700020I14Rik      | NR_015473                       | chr2              | 119419460    | 119420483  | -60                          |
| Cntln              | NM_175275                       | chr4              | 84529857     | 84530448   | -60                          |
| Gnb2l1             | NM_008143                       | chr11             | 48613334     | 48614270   | -59                          |
| Iscu               | NM_025526                       | chr5              | 114222500    | 114223022  | -59                          |
| D2Wsu81e           | NM_172660                       | chr2              | 30033872     | 30034201   | -59                          |
| Pigu               | NM_001004721                    | chr2              | 155182940    | 155183495  | -59                          |
| Nkiras2            | NM_028024                       | chr11             | 100484014    | 100484406  | -58                          |
| Enpp4              | NM_199016                       | chr17             | 44242524     | 44243104   | -58                          |
| Kif5b              | NM_008448                       | chr18             | 6241259      | 6241899    | -58                          |
| Ssrp1              | NM_001136081                    | chr2              | 84877062     | 84878037   | -58                          |
| Nampt              | NM_021524                       | chr12             | 33504783     | 33505501   | -57                          |
| Clasrp             | NM_016680                       | chr7              | 20189583     | 20190163   | -57                          |
| Rassf1             | NM_019713                       | chr9              | 107456358    | 107457355  | -57                          |
| 5430402O13Rik      | NR_015581                       | chr6              | 50516224     | 50516946   | -56                          |
| Pold1              | NM_011131                       | chr7              | 51803929     | 51804551   | -56                          |
| Ints7              | NM_178632                       | chr1              | 193399018    | 193400095  | -56                          |
| Dcaf7              | NM_027946                       | chr11             | 105897902    | 105898358  | -55                          |
| Litaf              | NM_019980                       | chr16             | 10992934     | 10993602   | -55                          |
| Nfkbiz             | NM_001159394                    | chr16             | 55822017     | 55822593   | -55                          |
| Rps3               | NM_012052                       | chr7              | 106631844    | 106632702  | -55                          |
| Ralbp1             | NM_001198949                    | chr17             | 66234021     | 66234612   | -55                          |
| Gid8               | NM_001289652                    | chr2              | 180444536    | 180445215  | -55                          |
| Stard7             | NM_139308                       | chr2              | 127095580    | 127096240  | -54                          |
| Mta2               | NM_011842                       | chr19             | 9016047      | 9016664    | -54                          |
| Cntrl              | NM_012018                       | chr2              | 34964705     | 34965210   | -54                          |
| Fbxo25             | NM_025785                       | chr8              | 13907482     | 13908021   | -54                          |
| Dscr3              | NM_007834                       | chr16             | 94747745     | 94748831   | -53                          |
| Cttnbl1            | NM_025680                       | chr2              | 157562894    | 157563272  | -53                          |
| Cep68              | NM_172260                       | chr11             | 20149085     | 20149872   | -53                          |
| Hiatl1             | NM_133680                       | chr13             | 65213998     | 65214685   | -53                          |
| 9130023H24Rik      | NM_177001                       | chr7              | 135381212    | 135381981  | -53                          |
| Smc2               | NM_008017                       | chr4              | 52451800     | 52452336   | -52                          |
| Mon1a              | NM_028369                       | chr9              | 107790267    | 107790547  | -52                          |
| Rrm2               | NM_009104                       | chr12             | 25392820     | 25393313   | -52                          |
| Bpgm               | NM_007563                       | chr6              | 34426068     | 34426539   | -52                          |
| Cetn4              | NM_145825                       | chr3              | 37210845     | 37211991   | -51                          |
| Sae1               | NM_001285892                    | chr7              | 16972910     | 16973680   | -51                          |
| Slx1b              | NM_029420                       | chr7              | 133839068    | 133839626  | -51                          |
| Syn3               | NM_013722                       | chr10             | 85961438     | 85961943   | -51                          |
| Eif4g1             | NM_145941                       | chr16             | 20672495     | 20673046   | -51                          |
| Paqr4              | NM_023824                       | chr17             | 23877117     | 23877576   | -51                          |
| Top2a              | NM_011623                       | chr11             | 98885278     | 98885826   | -50                          |

**Supplemental Table 2. Significant ChIP-seq E2F1 promoter peaks  
(+/- 2kb from the TSS)**

| <b>Gene Symbol</b> | <b>Refseq<br/>Transcript ID</b> | <b>Chromosome</b> | <b>Start</b> | <b>End</b> | <b>distance<br/>from TSS</b> |
|--------------------|---------------------------------|-------------------|--------------|------------|------------------------------|
| Slc9a1             | NM_016981                       | chr4              | 132925200    | 132926072  | -50                          |
| 1810014B01Rik      | NR_015572                       | chr10             | 86148033     | 86148410   | -50                          |
| Abcf1              | NM_013854                       | chr17             | 36106447     | 36107040   | -50                          |
| Ubxn6              | NM_024432                       | chr17             | 56214267     | 56214654   | -50                          |
| Arpc5l             | NM_028809                       | chr2              | 38863366     | 38863852   | -49                          |
| Kdsr               | NM_027534                       | chr1              | 108656109    | 108656623  | -48                          |
| Btg2               | NM_007570                       | chr1              | 135975587    | 135975970  | -48                          |
| Lims1              | NM_026148                       | chr10             | 57785840     | 57786491   | -48                          |
| Ndc80              | NM_023294                       | chr17             | 71875808     | 71876679   | -48                          |
| Tmco1              | NM_001039483                    | chr1              | 169238334    | 169239172  | -47                          |
| Mterfd2            | NM_178051                       | chr1              | 95202229     | 95202756   | -47                          |
| Eml6               | NM_146016                       | chr11             | 29925868     | 29926289   | -47                          |
| Ubxn1              | NM_146093                       | chr19             | 8945758      | 8946245    | -47                          |
| Extl3              | NM_018788                       | chr14             | 65716747     | 65717229   | -46                          |
| Cacul1             | NM_001172097                    | chr19             | 60656570     | 60657371   | -46                          |
| Rfc2               | NM_020022                       | chr5              | 135058113    | 135058914  | -46                          |
| Smim7              | NM_172396                       | chr8              | 75094678     | 75095305   | -46                          |
| Cmc2               | NM_026844                       | chr8              | 119444883    | 119445878  | -46                          |
| Dtymk              | NM_001105667                    | chr1              | 95698209     | 95698901   | -45                          |
| Abhd12             | NM_024465                       | chr2              | 150730166    | 150730855  | -45                          |
| Casp2              | NM_007610                       | chr6              | 42214636     | 42215350   | -44                          |
| Ufsp2              | NM_138668                       | chr8              | 47060433     | 47061241   | -44                          |
| Ttll12             | NM_183017                       | chr15             | 83425392     | 83425867   | -44                          |
| Cdkn2aipnl         | NM_029976                       | chr11             | 51780819     | 51781359   | -43                          |
| Gpatch8            | NM_001159492                    | chr11             | 102417080    | 102417948  | -43                          |
| 2900076A07Rik      | NR_045299                       | chr7              | 88668008     | 88668776   | -43                          |
| Fam111a            | NM_026640                       | chr19             | 12647709     | 12648234   | -43                          |
| Eri3               | NM_001285901                    | chr4              | 117222706    | 117223065  | -43                          |
| Peak1              | NM_172924                       | chr9              | 56265579     | 56266218   | -43                          |
| Tmem209            | NM_178625                       | chr6              | 30459287     | 30460205   | -41                          |
| Nsmce1             | NM_026330                       | chr7              | 132634857    | 132635335  | -41                          |
| Mpdu1              | NM_011900                       | chr11             | 69475835     | 69476532   | -41                          |
| Ppp1r16a           | NM_033371                       | chr15             | 76501812     | 76502325   | -41                          |
| Pcbp3              | NM_021568                       | chr10             | 76424422     | 76425040   | -40                          |
| Npm1               | NM_001252260                    | chr11             | 33063036     | 33063454   | -40                          |
| Slc39a13           | NM_026721                       | chr2              | 90910179     | 90910843   | -40                          |
| Mycbp              | NM_019660                       | chr4              | 123581986    | 123582444  | -40                          |
| Msh3               | NM_010829                       | chr13             | 93124744     | 93125249   | -40                          |
| Nubp1              | NM_011955                       | chr16             | 10411380     | 10412601   | -40                          |
| Id1                | NM_010495                       | chr2              | 152561616    | 152562277  | -40                          |
| Magoh              | NM_001282737                    | chr4              | 107551939    | 107552700  | -40                          |
| Arv1               | NM_026855                       | chr8              | 127245495    | 127246502  | -40                          |
| Pim3               | NM_145478                       | chr15             | 88692272     | 88692896   | -39                          |
| Hist2h4            | NM_033596                       | chr3              | 96067002     | 96067554   | -39                          |
| Gps2               | NM_019726                       | chr11             | 69727314     | 69727995   | -39                          |
| Fbxo5              | NM_025995                       | chr10             | 4540176      | 4541898    | -38                          |
| Alkbh7             | NM_027372                       | chr17             | 57136462     | 57136984   | -38                          |
| Ascc3              | NM_198007                       | chr10             | 50311912     | 50312961   | -38                          |

**Supplemental Table 2. Significant ChIP-seq E2F1 promoter peaks  
(+/- 2kb from the TSS)**

| <b>Gene Symbol</b> | <b>Refseq<br/>Transcript ID</b> | <b>Chromosome</b> | <b>Start</b> | <b>End</b> | <b>distance<br/>from TSS</b> |
|--------------------|---------------------------------|-------------------|--------------|------------|------------------------------|
| Dctpp1             | NM_023203                       | chr7              | 134403767    | 134404668  | -38                          |
| Xpo6               | NM_028816                       | chr7              | 133343725    | 133344191  | -37                          |
| Cdk2               | NM_016756                       | chr10             | 128141876    | 128142409  | -37                          |
| Zbtbd6             | NM_001034882                    | chr14             | 79851422     | 79851787   | -37                          |
| Rsl1d1             | NM_025546                       | chr16             | 11202989     | 11203852   | -37                          |
| Atf6b              | NM_017406                       | chr17             | 34783868     | 34784239   | -37                          |
| Gm2a               | NM_010299                       | chr11             | 54911218     | 54911683   | -36                          |
| Mtmr4              | NM_133215                       | chr11             | 87405067     | 87406298   | -36                          |
| Lsm8               | NM_133939                       | chr6              | 18798182     | 18799015   | -36                          |
| Nbeal2             | NM_183276                       | chr9              | 110556481    | 110556918  | -36                          |
| Fam109a            | NM_175474                       | chr5              | 122298798    | 122299204  | -35                          |
| Ppp6r1             | NM_172894                       | chr7              | 4610295      | 4610877    | -35                          |
| Pola2              | NM_008893                       | chr19             | 5963741      | 5964738    | -35                          |
| Fau                | NM_001160239                    | chr19             | 6057334      | 6058371    | -35                          |
| Ccdc134            | NM_172428                       | chr15             | 81957841     | 81958793   | -34                          |
| Vmp1               | NM_029478                       | chr11             | 86496977     | 86497736   | -34                          |
| Sap30bp            | NM_020483                       | chr11             | 115794729    | 115795148  | -34                          |
| Chchd3             | NM_025336                       | chr6              | 33009956     | 33010413   | -34                          |
| Mcmbp              | NM_145955                       | chr7              | 135883501    | 135884449  | -33                          |
| 2810417H13Rik      | NM_026515                       | chr9              | 65737898     | 65738294   | -33                          |
| Chchd1             | NM_025366                       | chr14             | 21521781     | 21522650   | -33                          |
| Ncaph              | NM_144818                       | chr2              | 126959295    | 126960148  | -33                          |
| Nsl1               | NM_198654                       | chr1              | 192886638    | 192887096  | -32                          |
| Bsg                | NM_001077184                    | chr10             | 79166564     | 79167576   | -32                          |
| Rbm25              | NM_027349                       | chr12             | 84972892     | 84973410   | -32                          |
| Eef1d              | NM_001285434                    | chr15             | 75739354     | 75740256   | -32                          |
| Hsp90b1            | NM_011631                       | chr10             | 86167866     | 86168573   | -32                          |
| Anapc1             | NM_008569                       | chr2              | 128512667    | 128513656  | -32                          |
| Cep250             | NM_001130000                    | chr2              | 155781697    | 155782826  | -32                          |
| Hk2                | NM_013820                       | chr6              | 82724066     | 82724891   | -32                          |
| Hmbs               | NM_013551                       | chr9              | 44152173     | 44152510   | -32                          |
| Tmem194            | NM_001113211                    | chr10             | 127113575    | 127114603  | -31                          |
| Psmb7              | NM_011187                       | chr2              | 38499118     | 38499794   | -31                          |
| Rgp1               | NM_172866                       | chr4              | 43591215     | 43591935   | -31                          |
| Fh1                | NM_010209                       | chr1              | 177555516    | 177556075  | -31                          |
| Skp2               | NM_013787                       | chr15             | 9069715      | 9070764    | -31                          |
| Pyroxd1            | NM_183165                       | chr6              | 142293914    | 142294457  | -31                          |
| Chtf18             | NM_145409                       | chr17             | 25863957     | 25864821   | -30                          |
| Qsox2              | NM_153559                       | chr2              | 26092741     | 26093197   | -30                          |
| Cops6              | NM_012002                       | chr5              | 138601947    | 138602652  | -30                          |
| 4930429F24Rik      | NR_040734                       | chr9              | 79641031     | 79641804   | -30                          |
| Sipa1              | NM_001164568                    | chr19             | 5663584      | 5663886    | -29                          |
| Hnrnpd             | NM_007516                       | chr5              | 100407578    | 100408392  | -29                          |
| 2010320M18Rik      | NR_029440                       | chr8              | 73300405     | 73301057   | -29                          |
| Pias1              | NM_019663                       | chr9              | 62828313     | 62829115   | -29                          |
| Ostm1              | NM_172416                       | chr10             | 42398429     | 42398956   | -29                          |
| Adprh              | NM_007414                       | chr16             | 38452554     | 38453039   | -29                          |
| Sbno2              | NM_183426                       | chr10             | 79564971     | 79565977   | -28                          |

**Supplemental Table 2. Significant ChIP-seq E2F1 promoter peaks  
(+/- 2kb from the TSS)**

| <b>Gene Symbol</b> | <b>Refseq<br/>Transcript ID</b> | <b>Chromosome</b> | <b>Start</b> | <b>End</b> | <b>distance<br/>from TSS</b> |
|--------------------|---------------------------------|-------------------|--------------|------------|------------------------------|
| Kif18a             | NM_139303                       | chr2              | 109120671    | 109121061  | -28                          |
| Zbtb5              | NM_173399                       | chr4              | 45025052     | 45025570   | -28                          |
| Nop2               | NM_138747                       | chr6              | 125081600    | 125082144  | -28                          |
| Nr1h2              | NM_009473                       | chr7              | 51809094     | 51809630   | -28                          |
| Racgap1            | NM_001253808                    | chr15             | 99481916     | 99482311   | -28                          |
| Clhc1              | NM_001081099                    | chr4              | 134066495    | 134067276  | -28                          |
| Zfp111             | NM_019940                       | chr7              | 24992979     | 24993410   | -28                          |
| Daxx               | NM_001199733                    | chr17             | 34046164     | 34046872   | -27                          |
| Aifm1              | NM_012019                       | chrX              | 45866565     | 45866967   | -27                          |
| Pold2              | NM_008894                       | chr11             | 5778020      | 5778549    | -27                          |
| Rxrb               | NM_001205214                    | chr17             | 34168375     | 34169084   | -27                          |
| Haus6              | NM_173400                       | chr4              | 86257634     | 86258269   | -27                          |
| Chd4               | NM_145979                       | chr6              | 125045838    | 125046469  | -27                          |
| Ruvbl2             | NM_011304                       | chr7              | 52689482     | 52690237   | -27                          |
| Timm17b            | NM_011591                       | chrX              | 7476146      | 7476847    | -27                          |
| Anapc11            | NM_001038230                    | chr11             | 120459580    | 120460058  | -26                          |
| Atp6v0e            | NM_025272                       | chr17             | 26813156     | 26813472   | -26                          |
| Slc25a16           | NM_175194                       | chr10             | 62383182     | 62383528   | -25                          |
| Ndnf2              | NM_023239                       | chr7              | 72017704     | 72018196   | -25                          |
| Sos1               | NM_009231                       | chr17             | 80879550     | 80880083   | -25                          |
| Cotl1              | NM_028071                       | chr8              | 122364345    | 122364660  | -25                          |
| Pkm                | NM_001253883                    | chr9              | 59503858     | 59504441   | -25                          |
| Golim4             | NM_001291069                    | chr3              | 75760512     | 75761276   | -24                          |
| Wdr83              | NM_026399                       | chr8              | 87604505     | 87604831   | -24                          |
| Serhl              | NM_023475                       | chr15             | 82930317     | 82930904   | -24                          |
| Igf2r              | NM_010515                       | chr17             | 12962375     | 12962814   | -24                          |
| Sp9                | NM_001005343                    | chr2              | 73109761     | 73110156   | -24                          |
| Gja1               | NM_010288                       | chr10             | 56096871     | 56097294   | -23                          |
| Xpot               | NM_001081056                    | chr10             | 121062973    | 121063814  | -23                          |
| Fastkd3            | NM_027123                       | chr13             | 68720769     | 68721434   | -23                          |
| Fra10ac1           | NM_001081075                    | chr19             | 38298358     | 38298929   | -23                          |
| Fam172a            | NM_138312                       | chr13             | 77847450     | 77848406   | -22                          |
| Fdps               | NM_134469                       | chr3              | 88905478     | 88906342   | -22                          |
| Vamp3              | NM_009498                       | chr4              | 150431775    | 150432391  | -22                          |
| Sgol2              | NM_199007                       | chr1              | 58052315     | 58053276   | -22                          |
| Pfas               | NM_001159519                    | chr11             | 68821600     | 68822365   | -22                          |
| Ppif               | NM_134084                       | chr14             | 26513345     | 26513922   | -22                          |
| Gtf2h3             | NM_181410                       | chr5              | 125028961    | 125029308  | -22                          |
| Cnksr3             | NM_172546                       | chr10             | 3133934      | 3134630    | -21                          |
| Rnf217             | NM_001146349                    | chr10             | 31329318     | 31329784   | -21                          |
| Cmss1              | NM_025599                       | chr16             | 57606582     | 57607418   | -21                          |
| Ints8              | NM_178112                       | chr4              | 11181272     | 11181580   | -21                          |
| Chmp2a             | NM_026885                       | chr7              | 13619846     | 13620446   | -21                          |
| Nup205             | NM_027513                       | chr6              | 35127374     | 35127815   | -21                          |
| Prdx4              | NM_016764                       | chrX              | 151772833    | 151773199  | -20                          |
| Tssc4              | NM_138631                       | chr7              | 150254903    | 150255602  | -20                          |
| Dnajb1             | NM_018808                       | chr8              | 86131399     | 86132708   | -20                          |
| Stpg2              | NM_198659                       | chr3              | 138868549    | 138869125  | -19                          |

**Supplemental Table 2. Significant ChIP-seq E2F1 promoter peaks  
(+/- 2kb from the TSS)**

| <b>Gene Symbol</b> | <b>Refseq<br/>Transcript ID</b> | <b>Chromosome</b> | <b>Start</b> | <b>End</b> | <b>distance<br/>from TSS</b> |
|--------------------|---------------------------------|-------------------|--------------|------------|------------------------------|
| Ahdc1              | NM_146155                       | chr4              | 132567155    | 132567647  | -19                          |
| Gatsl2             | NM_030719                       | chr5              | 134575205    | 134575991  | -19                          |
| Kdm3a              | NM_173001                       | chr6              | 71582451     | 71582945   | -19                          |
| Tmpo               | NM_001283048                    | chr10             | 90632944     | 90633681   | -19                          |
| Wapal              | NM_001004436                    | chr14             | 35486722     | 35487467   | -19                          |
| Epb4.1             | NM_001128607                    | chr4              | 131630979    | 131631511  | -18                          |
| Snrnp48            | NM_026382                       | chr13             | 38296276     | 38297304   | -17                          |
| Chaf1a             | NM_013733                       | chr17             | 56179450     | 56180192   | -17                          |
| Zfp568             | NM_001167872                    | chr7              | 30768640     | 30769272   | -17                          |
| Apex2              | NM_029943                       | chrX              | 147022453    | 147022963  | -17                          |
| Snora78            | NR_028515                       | chr17             | 24856524     | 24857061   | -17                          |
| Cebpa              | NM_007678                       | chr7              | 35904002     | 35904587   | -17                          |
| Rad54b             | NM_001039556                    | chr4              | 11485813     | 11486287   | -16                          |
| Gak                | NM_001282052                    | chr5              | 109058520    | 109059102  | -16                          |
| Dennd6b            | NM_027081                       | chr15             | 89026663     | 89027176   | -16                          |
| Nuak2              | NM_001195025                    | chr1              | 134212408    | 134212964  | -15                          |
| Rpl37              | NM_026069                       | chr15             | 5066198      | 5066996    | -15                          |
| Mrps34             | NM_023260                       | chr17             | 25031752     | 25032346   | -15                          |
| Mvb12a             | NM_028617                       | chr8              | 74066399     | 74067227   | -15                          |
| Midn               | NM_021565                       | chr10             | 79610693     | 79611346   | -15                          |
| Rabl6              | NM_001024616                    | chr2              | 25463585     | 25464374   | -15                          |
| Rpa1               | NM_001164223                    | chr11             | 75161557     | 75162239   | -14                          |
| D11Wsu47e          | NM_177777                       | chr11             | 113545308    | 113546114  | -14                          |
| Phgdh              | NM_016966                       | chr3              | 98143741     | 98144069   | -14                          |
| H2afz              | NM_016750                       | chr3              | 137527158    | 137527714  | -14                          |
| Poln               | NM_001289803                    | chr5              | 34511893     | 34512483   | -14                          |
| Brpf1              | NM_030178                       | chr6              | 113256720    | 113257512  | -14                          |
| Ogg1               | NM_010957                       | chr6              | 113276618    | 113277292  | -14                          |
| Hnrnpk             | NM_025279                       | chr13             | 58503468     | 58504311   | -14                          |
| Rnd1               | NM_172612                       | chr15             | 98507377     | 98508432   | -14                          |
| Rbl1               | NM_011249                       | chr2              | 157029634    | 157030931  | -14                          |
| Rfc3               | NM_027009                       | chr5              | 152453614    | 152453977  | -14                          |
| Rad50              | NM_009012                       | chr11             | 53520340     | 53521325   | -13                          |
| Dlst               | NM_030225                       | chr12             | 86451478     | 86452061   | -13                          |
| Cep70              | NM_023873                       | chr9              | 99143597     | 99144150   | -13                          |
| Hmg20b             | NM_010440                       | chr10             | 80812650     | 80813715   | -12                          |
| Hist1h2ad          | NM_178188                       | chr13             | 23666062     | 23666413   | -12                          |
| Wdr91              | NM_001013366                    | chr6              | 34860677     | 34861006   | -12                          |
| Nudt7              | NM_001290180                    | chr8              | 116657245    | 116657678  | -12                          |
| Cnot6              | NM_212484                       | chr11             | 49525856     | 49526612   | -11                          |
| Atad5              | NM_001029856                    | chr11             | 79902622     | 79903158   | -11                          |
| B2m                | NM_009735                       | chr2              | 121973224    | 121973598  | -11                          |
| Wrn                | NM_001122822                    | chr8              | 34495727     | 34496291   | -11                          |
| Snrpf              | NM_027246                       | chr10             | 93052230     | 93052595   | -11                          |
| Msh5               | NM_001146215                    | chr17             | 35183040     | 35184315   | -11                          |
| Pagr1a             | NM_030240                       | chr7              | 134160374    | 134161377  | -11                          |
| Nsun5              | NM_145414                       | chr5              | 135845356    | 135846268  | -10                          |
| Zfp526             | NM_175436                       | chr7              | 26006172     | 26006746   | -10                          |



**Supplemental Table 2. Significant ChIP-seq E2F1 promoter peaks  
(+/- 2kb from the TSS)**

| Gene Symbol   | Refseq<br>Transcript ID | Chromosome | Start     | End       | distance<br>from TSS |
|---------------|-------------------------|------------|-----------|-----------|----------------------|
| Trim59        | NM_025863               | chr3       | 68848228  | 68849117  | -10                  |
| Cpsf3l        | NM_028020               | chr4       | 155243422 | 155243910 | -9                   |
| Gm6297        | NR_077221               | chr4       | 40669104  | 40669610  | -8                   |
| Timm50        | NM_025616               | chr7       | 29096823  | 29097321  | -8                   |
| Cep57l1       | NM_029132               | chr10      | 41528983  | 41529968  | -8                   |
| Fam208a       | NM_028945               | chr14      | 28241676  | 28242373  | -8                   |
| Dnase1l1      | NM_027109               | chrX       | 71526799  | 71527364  | -8                   |
| Brd8          | NM_030147               | chr18      | 34784164  | 34784882  | -7                   |
| Bbip1         | NM_001195348            | chr19      | 54018911  | 54019335  | -7                   |
| Pex11b        | NR_027845               | chr3       | 96438816  | 96439728  | -7                   |
| F3            | NM_010171               | chr3       | 121426180 | 121426714 | -7                   |
| Fyttl1        | NM_027226               | chr16      | 32877633  | 32878092  | -7                   |
| Spdya         | NM_029254               | chr17      | 71901199  | 71901588  | -7                   |
| Ythdf2        | NM_145393               | chr4       | 131767886 | 131768467 | -7                   |
| Arhgap33      | NM_001289682            | chr7       | 31319590  | 31320579  | -7                   |
| Diap3         | NM_019670               | chr14      | 87540246  | 87541606  | -6                   |
| Rnf219        | NM_026047               | chr14      | 104921629 | 104922147 | -6                   |
| Tsc2          | NM_011647               | chr17      | 24769350  | 24769804  | -6                   |
| Nfkbil1       | NM_010909               | chr17      | 35372485  | 35373045  | -6                   |
| Cdc123        | NM_133837               | chr2       | 5765757   | 5766265   | -6                   |
| Wdsub1        | NM_028118               | chr2       | 59720221  | 59721115  | -6                   |
| Gtf3c4        | NM_001166033            | chr2       | 28695426  | 28696343  | -6                   |
| Irf2bp1       | NM_178757               | chr7       | 19589091  | 19589724  | -6                   |
| Faf2          | NM_178397               | chr13      | 54722756  | 54723522  | -5                   |
| Wdr34         | NM_001008498            | chr2       | 29903873  | 29904933  | -5                   |
| Gtpbp6        | NM_145147               | chr5       | 110536950 | 110537490 | -5                   |
| Smg9          | NM_028047               | chr7       | 25184303  | 25184979  | -5                   |
| Tecr          | NM_134118               | chr8       | 86118038  | 86118750  | -5                   |
| Asxl2         | NM_001270988            | chr12      | 3426554   | 3427149   | -5                   |
| Rfc4          | NM_145480               | chr16      | 23127632  | 23127981  | -5                   |
| Dcaf12        | NM_026893               | chr4       | 41261693  | 41262182  | -5                   |
| Tmem194b      | NM_001142647            | chr1       | 52687314  | 52687774  | -4                   |
| Cep76         | NM_001081073            | chr18      | 67800724  | 67801262  | -4                   |
| 9430008C03Rik | NR_015463               | chr2       | 158186931 | 158187565 | -4                   |
| Cyr61         | NM_010516               | chr3       | 145312665 | 145313239 | -4                   |
| Mcm6          | NM_008567               | chr1       | 130255906 | 130256565 | -4                   |
| Amdhd2        | NM_172935               | chr17      | 24300482  | 24300923  | -4                   |
| Arl4c         | NM_177305               | chr1       | 90598412  | 90599124  | -3                   |
| Safb          | NM_001163300            | chr17      | 56723896  | 56724906  | -3                   |
| Ect2          | NM_001177625            | chr3       | 27052556  | 27052999  | -3                   |
| Prdx2         | NM_011563               | chr8       | 87493321  | 87493766  | -3                   |
| Gcat          | NM_001161712            | chr15      | 78860992  | 78861610  | -2                   |
| 9230114K14Rik | NR_015537               | chr5       | 52581631  | 52582203  | -2                   |
| Polr1c        | NM_009085               | chr17      | 46384719  | 46385270  | -2                   |
| Toe1          | NM_026654               | chr4       | 116479794 | 116480535 | -2                   |
| Map4          | NM_001205330            | chr9       | 109833807 | 109834744 | -2                   |
| Esco2         | NM_028039               | chr14      | 66452528  | 66453084  | -1                   |
| Fbln1         | NM_010180               | chr15      | 85036079  | 85036793  | -1                   |

**Supplemental Table 2. Significant ChIP-seq E2F1 promoter peaks  
(+/- 2kb from the TSS)**

| <b>Gene Symbol</b> | <b>Refseq<br/>Transcript ID</b> | <b>Chromosome</b> | <b>Start</b> | <b>End</b> | <b>distance<br/>from TSS</b> |
|--------------------|---------------------------------|-------------------|--------------|------------|------------------------------|
| Gspt1              | NM_001130008                    | chr16             | 11254010     | 11254826   | -1                           |
| Zfp169             | NM_001164576                    | chr13             | 48608618     | 48608991   | -1                           |
| Polh               | NM_030715                       | chr17             | 46339011     | 46340136   | -1                           |
| 1700028E10Rik      | NR_045700                       | chr5              | 152170777    | 152171720  | -1                           |
| Hmg20a             | NM_025812                       | chr9              | 56266272     | 56267031   | -1                           |
| Cdan1              | NM_026891                       | chr2              | 120557004    | 120557500  | 0                            |
| Scfd2              | NM_001114660                    | chr5              | 74927502     | 74928030   | 0                            |
| Htra2              | NM_019752                       | chr6              | 83004226     | 83004902   | 0                            |
| Edem1              | NM_138677                       | chr6              | 108778340    | 108778928  | 0                            |
| Zfp386             | NM_001286214                    | chr12             | 117285662    | 117286207  | 1                            |
| Ranbp1             | NM_011239                       | chr16             | 18248386     | 18249185   | 1                            |
| Mthfd1             | NM_138745                       | chr12             | 77355859     | 77356579   | 1                            |
| Skiv2l             | NM_021337                       | chr17             | 34986814     | 34987480   | 1                            |
| Poli               | NM_001289515                    | chr18             | 70689668     | 70690278   | 1                            |
| Ppat               | NM_172146                       | chr5              | 77379986     | 77381216   | 1                            |
| Snrnp40            | NM_025645                       | chr4              | 130037099    | 130037660  | 2                            |
| Mto1               | NM_026658                       | chr9              | 78295788     | 78296247   | 2                            |
| Cct7               | NM_007638                       | chr6              | 85401127     | 85401874   | 3                            |
| Huwe1              | NM_021523                       | chrX              | 148237473    | 148238180  | 3                            |
| Shmt1              | NM_009171                       | chr11             | 60624470     | 60625056   | 3                            |
| Golga1             | NM_001290649                    | chr2              | 38920728     | 38921386   | 3                            |
| Zmym6              | NM_177462                       | chr4              | 126754466    | 126754792  | 3                            |
| Anapc4             | NM_024213                       | chr5              | 53225183     | 53225569   | 3                            |
| Fbxl8              | NM_015821                       | chr8              | 107788280    | 107788820  | 3                            |
| Diap2              | NM_172493                       | chrX              | 126283999    | 126284561  | 3                            |
| Sarnp              | NM_025364                       | chr10             | 128258419    | 128259240  | 4                            |
| Abhd13             | NM_026868                       | chr8              | 9977284      | 9978155    | 4                            |
| Dctn6              | NM_001293759                    | chr8              | 35171481     | 35172042   | 4                            |
| Asf1b              | NM_024184                       | chr8              | 86479124     | 86480067   | 4                            |
| Prim1              | NM_008921                       | chr10             | 127452019    | 127452529  | 4                            |
| Pspc1              | NM_025682                       | chr14             | 57396912     | 57397384   | 4                            |
| Setdb2             | NM_001081024                    | chr14             | 60059513     | 60059905   | 4                            |
| Tmbim6             | NM_001171034                    | chr15             | 99223167     | 99223595   | 4                            |
| E4f1               | NM_007893                       | chr17             | 24591884     | 24592618   | 4                            |
| Banf1              | NM_011793                       | chr19             | 5366400      | 5367342    | 4                            |
| Mitd1              | NM_026913                       | chr1              | 37947003     | 37947498   | 5                            |
| Hist1h1c           | NM_015786                       | chr13             | 23830515     | 23830844   | 5                            |
| Pole4              | NM_025882                       | chr6              | 82602493     | 82603214   | 5                            |
| Gstm1              | NM_010358                       | chr3              | 107820597    | 107821173  | 5                            |
| Jade1              | NM_001130186                    | chr3              | 41368494     | 41369119   | 6                            |
| Ncbp1              | NM_001033201                    | chr4              | 46151219     | 46151556   | 6                            |
| Fancd2             | NM_001033244                    | chr6              | 113481253    | 113482108  | 6                            |
| Rbbp4              | NM_009030                       | chr4              | 129012063    | 129013150  | 7                            |
| Csrp1              | NM_007791                       | chr1              | 137625529    | 137626031  | 7                            |
| Canx               | NM_001110500                    | chr11             | 50138743     | 50139591   | 7                            |
| Nans               | NM_053179                       | chr4              | 46501974     | 46502440   | 7                            |
| Mtor               | NM_020009                       | chr4              | 147822365    | 147823029  | 7                            |
| Ficd               | NM_001010825                    | chr5              | 114185462    | 114186132  | 7                            |

**Supplemental Table 2. Significant ChIP-seq E2F1 promoter peaks  
(+/- 2kb from the TSS)**

| <b>Gene Symbol</b> | <b>Refseq<br/>Transcript ID</b> | <b>Chromosome</b> | <b>Start</b> | <b>End</b> | <b>distance<br/>from TSS</b> |
|--------------------|---------------------------------|-------------------|--------------|------------|------------------------------|
| Hjurp              | NM_198652                       | chr1              | 90173642     | 90174649   | 8                            |
| Rft1               | NM_177815                       | chr14             | 31467299     | 31467836   | 8                            |
| Cuta               | NM_026948                       | chr17             | 27075861     | 27077088   | 8                            |
| Cdc5l              | NM_152810                       | chr17             | 45570218     | 45571077   | 8                            |
| Itgb3bp            | NM_026348                       | chr4              | 99495427     | 99496174   | 8                            |
| Cdkal1             | NM_144536                       | chr13             | 29947066     | 29947830   | 8                            |
| Zfp382             | NM_001081007                    | chr7              | 30906541     | 30907407   | 8                            |
| Gadd45b            | NM_008655                       | chr10             | 80392341     | 80393346   | 9                            |
| Naa60              | NM_029090                       | chr16             | 3884452      | 3884801    | 9                            |
| Stard6             | NM_001289648                    | chr18             | 70631931     | 70632536   | 9                            |
| Mybl2              | NM_008652                       | chr2              | 162879873    | 162880884  | 9                            |
| Nbn                | NM_013752                       | chr4              | 15884882     | 15885361   | 9                            |
| Ccdc37             | NM_173775                       | chr6              | 90378249     | 90378680   | 9                            |
| Slc17a5            | NM_172773                       | chr9              | 78435557     | 78436128   | 9                            |
| Smdt1              | NM_026914                       | chr15             | 82176111     | 82176857   | 9                            |
| Ccdc85b            | NM_198616                       | chr19             | 5457289      | 5457817    | 9                            |
| Stil               | NM_009185                       | chr4              | 114672376    | 114673086  | 9                            |
| Cep41              | NM_031998                       | chr6              | 30643322     | 30644022   | 9                            |
| Bag3               | NM_013863                       | chr7              | 135666863    | 135667347  | 9                            |
| Xrcc2              | NM_020570                       | chr5              | 25211375     | 25211834   | 10                           |
| Sgms1              | NM_001168526                    | chr19             | 32284994     | 32285990   | 10                           |
| Eya3               | NM_210071                       | chr4              | 132194815    | 132195125  | 10                           |
| Rad18              | NM_001167730                    | chr6              | 112646242    | 112647064  | 10                           |
| Anapc13            | NM_181394                       | chr9              | 102528365    | 102528905  | 10                           |
| Eif4a3             | NM_138669                       | chr11             | 119161054    | 119161637  | 11                           |
| Txndc16            | NM_172597                       | chr14             | 45838648     | 45839467   | 11                           |
| Osmr               | NM_011019                       | chr15             | 6823806      | 6824797    | 11                           |
| Cep192             | NM_027556                       | chr18             | 67959471     | 67960070   | 11                           |
| Pan2               | NM_001252327                    | chr10             | 127739973    | 127740830  | 12                           |
| Nr1d1              | NM_145434                       | chr11             | 98636410     | 98636947   | 12                           |
| 4933427E11Rik      | NR_033197                       | chr15             | 74538848     | 74540356   | 12                           |
| Letm1              | NM_019694                       | chr5              | 34125074     | 34125606   | 12                           |
| Azi2               | NM_001286507                    | chr9              | 117949285    | 117950017  | 12                           |
| A230072C01Rik      | NR_027446                       | chrX              | 20538993     | 20539509   | 12                           |
| 0610010K14Rik      | NM_001177603                    | chr11             | 70051018     | 70051787   | 13                           |
| Rgmb               | NM_178615                       | chr17             | 15963280     | 15963793   | 13                           |
| Arhgap19           | NM_001163495                    | chr19             | 41876161     | 41876960   | 13                           |
| Zwilch             | NM_026507                       | chr9              | 64020489     | 64020960   | 13                           |
| Lin52              | NM_173756                       | chr12             | 85792254     | 85792686   | 13                           |
| Ndufv1             | NM_133666                       | chr19             | 4012250      | 4013232    | 13                           |
| 2410004B18Rik      | NM_025555                       | chr3              | 145600587    | 145601429  | 13                           |
| 1110008L16Rik      | NM_025373                       | chr12             | 56403466     | 56403807   | 14                           |
| Erh                | NM_007951                       | chr12             | 81744473     | 81745194   | 14                           |
| Nup188             | NM_198304                       | chr2              | 30141452     | 30142479   | 14                           |
| Dut                | NM_023595                       | chr2              | 125072859    | 125073668  | 14                           |
| 1700123M08Rik      | NR_040577                       | chr4              | 11893342     | 11894125   | 14                           |
| Tsfm               | NM_025537                       | chr10             | 126467593    | 126468117  | 14                           |
| Smg6               | NM_001002764                    | chr11             | 74739112     | 74739662   | 14                           |

**Supplemental Table 2. Significant ChIP-seq E2F1 promoter peaks  
(+/- 2kb from the TSS)**

| <b>Gene Symbol</b> | <b>Refseq<br/>Transcript ID</b> | <b>Chromosome</b> | <b>Start</b> | <b>End</b> | <b>distance<br/>from TSS</b> |
|--------------------|---------------------------------|-------------------|--------------|------------|------------------------------|
| Coro2b             | NM_175484                       | chr9              | 62384519     | 62385153   | 14                           |
| Gm10474            | NR_033481                       | chrX              | 65931230     | 65931888   | 14                           |
| A430005L14Rik      | NM_175287                       | chr4              | 153331059    | 153331660  | 15                           |
| Xrcc1              | NM_009532                       | chr7              | 25331952     | 25332413   | 15                           |
| Neil3              | NM_146208                       | chr8              | 54723939     | 54724868   | 15                           |
| Med9os             | NR_045273                       | chr11             | 59761176     | 59762090   | 15                           |
| Fmn13              | NM_011711                       | chr15             | 99200562     | 99201200   | 15                           |
| Tfg                | NM_019678                       | chr16             | 56717340     | 56717754   | 15                           |
| Pola1              | NM_008892                       | chrX              | 90877142     | 90877814   | 15                           |
| Sh3bp1             | NM_009164                       | chr15             | 78729773     | 78730688   | 16                           |
| Zfp397             | NM_027007                       | chr18             | 24112997     | 24113410   | 16                           |
| Depdc1b            | NM_178683                       | chr13             | 109106095    | 109106997  | 16                           |
| Pkd1               | NM_013630                       | chr17             | 24686627     | 24687193   | 16                           |
| Gpr89              | NM_026229                       | chr3              | 96708933     | 96709475   | 16                           |
| 1700101E01Rik      | NM_001166705                    | chr2              | 28910267     | 28910870   | 17                           |
| Taf12              | NM_025579                       | chr4              | 131830095    | 131830516  | 17                           |
| Ndufs2             | NM_153064                       | chr1              | 173176923    | 173177527  | 17                           |
| Trim27             | NM_009054                       | chr13             | 21271449     | 21272183   | 17                           |
| Cnih1              | NM_009919                       | chr14             | 47407776     | 47408252   | 17                           |
| Aasdh              | NM_173765                       | chr5              | 77334289     | 77334753   | 17                           |
| Banp               | NM_016812                       | chr8              | 124474065    | 124474751  | 17                           |
| 4933405D12Rik      | NR_046036                       | chr3              | 122626772    | 122627259  | 18                           |
| Wdfy3              | NM_172882                       | chr5              | 102498702    | 102499141  | 18                           |
| Cd2bp2             | NM_001285905                    | chr7              | 134339079    | 134340066  | 18                           |
| Armc9              | NM_027456                       | chr1              | 88051115     | 88051699   | 18                           |
| Pitpnb             | NM_019640                       | chr5              | 111759414    | 111760186  | 18                           |
| Dym                | NM_027727                       | chr18             | 75178215     | 75178672   | 19                           |
| Pcnxl3             | NM_144868                       | chr19             | 5688434      | 5689343    | 19                           |
| Grk4               | NM_019497                       | chr5              | 35002751     | 35003340   | 19                           |
| Whsc111            | NM_001001735                    | chr8              | 26712481     | 26713111   | 19                           |
| Tsga10             | NM_207228                       | chr1              | 37921502     | 37922311   | 20                           |
| Clasp1             | NM_029709                       | chr1              | 120285272    | 120286035  | 20                           |
| Ppp1r18            | NM_175242                       | chr17             | 36003218     | 36003939   | 20                           |
| Aacs               | NM_030210                       | chr5              | 125955934    | 125956589  | 20                           |
| Klf13              | NM_021366                       | chr7              | 71083530     | 71084031   | 20                           |
| Tmem107            | NM_028336                       | chr11             | 68883942     | 68884718   | 20                           |
| Rbfox2             | NM_175387                       | chr15             | 77136986     | 77137938   | 20                           |
| Myo9a              | NM_173018                       | chr9              | 59598534     | 59599466   | 20                           |
| Atp10a             | NM_009728                       | chr7              | 65913194     | 65913989   | 21                           |
| Asnsd1             | NM_133728                       | chr1              | 53409354     | 53409794   | 21                           |
| Tmem230            | NM_001141971                    | chr2              | 132073282    | 132073722  | 21                           |
| Tmem39b            | NM_199305                       | chr4              | 129373734    | 129374386  | 21                           |
| Glmn               | NM_133248                       | chr5              | 108026305    | 108026967  | 21                           |
| Zfp930             | NM_001013379                    | chr8              | 71732714     | 71733216   | 21                           |
| Snhg6              | NR_024067                       | chr1              | 9933974      | 9934379    | 22                           |
| Ncaph2             | NM_001271600                    | chr15             | 89185619     | 89186722   | 22                           |
| Mcm8               | NM_025676                       | chr2              | 132641589    | 132642206  | 22                           |
| Fam110a            | NM_146127                       | chr2              | 151805698    | 151806167  | 22                           |

**Supplemental Table 2. Significant ChIP-seq E2F1 promoter peaks  
(+/- 2kb from the TSS)**

| <b>Gene Symbol</b> | <b>Refseq<br/>Transcript ID</b> | <b>Chromosome</b> | <b>Start</b> | <b>End</b> | <b>distance<br/>from TSS</b> |
|--------------------|---------------------------------|-------------------|--------------|------------|------------------------------|
| Cox18              | NM_001033310                    | chr5              | 90652728     | 90653269   | 22                           |
| Myeov2             | NR_028108                       | chr1              | 94538238     | 94538766   | 22                           |
| Gtf3a              | NM_025652                       | chr5              | 147760073    | 147760435  | 22                           |
| Gm16039            | NR_033518                       | chr6              | 8208891      | 8209727    | 22                           |
| Zfp748             | NM_001035231                    | chr13             | 67653717     | 67654412   | 23                           |
| Atl2               | NM_178050                       | chr17             | 80295180     | 80295699   | 23                           |
| Hnrnpr             | NM_001277121                    | chr4              | 135866341    | 135867416  | 23                           |
| Mcph1              | NM_173189                       | chr8              | 18594793     | 18595596   | 23                           |
| Kif4               | NM_008446                       | chrX              | 97821233     | 97821618   | 23                           |
| Acap2              | NM_030138                       | chr16             | 31201020     | 31201579   | 24                           |
| Pskh1              | NM_173432                       | chr8              | 108424125    | 108424668  | 24                           |
| Rab11b             | NM_008997                       | chr17             | 33896986     | 33897826   | 24                           |
| Tmem138            | NM_028411                       | chr19             | 10651160     | 10651964   | 24                           |
| Herc2              | NM_010418                       | chr7              | 63305245     | 63305851   | 24                           |
| Gpd1l              | NM_175380                       | chr9              | 114842713    | 114843446  | 25                           |
| Taf1               | NM_001290729                    | chrX              | 98727766     | 98728429   | 25                           |
| Yeats4             | NM_026570                       | chr10             | 116661108    | 116661966  | 25                           |
| Mroh1              | NM_175457                       | chr15             | 76210663     | 76211271   | 25                           |
| Spata5             | NM_001163511                    | chr3              | 37318849     | 37319603   | 25                           |
| Polr3gl            | NM_001293701                    | chr3              | 96397750     | 96398406   | 25                           |
| Zbtb48             | NM_133879                       | chr4              | 151401482    | 151402026  | 25                           |
| Nudt21             | NM_026623                       | chr8              | 96560426     | 96561400   | 25                           |
| Zfp41              | NM_001044718                    | chr15             | 75446876     | 75447401   | 26                           |
| Txn1l              | NM_016792                       | chr18             | 63851722     | 63852251   | 26                           |
| Rps11              | NM_013725                       | chr7              | 52379495     | 52379970   | 26                           |
| Gas2l3             | NM_001284344                    | chr10             | 88906154     | 88907216   | 26                           |
| Triap1             | NM_026933                       | chr5              | 115791032    | 115791530  | 26                           |
| Setd8              | NM_030241                       | chr5              | 124889718    | 124890210  | 26                           |
| Mast3              | NM_199308                       | chr8              | 73316003     | 73316607   | 26                           |
| Hn1                | NM_008258                       | chr11             | 115375159    | 115376154  | 27                           |
| Jtb                | NM_206924                       | chr3              | 90035343     | 90035746   | 27                           |
| Cant1              | NM_001267592                    | chr11             | 118280139    | 118280668  | 28                           |
| 1810022K09Rik      | NM_001099674                    | chr3              | 14610878     | 14611577   | 28                           |
| Akr1a1             | NM_021473                       | chr4              | 116323975    | 116324526  | 28                           |
| Als2               | NM_028717                       | chr1              | 59293661     | 59294431   | 28                           |
| Sept2              | NM_001159719                    | chr1              | 95375331     | 95375999   | 28                           |
| Stxbp4             | NM_011505                       | chr11             | 90498981     | 90499805   | 28                           |
| Zbtb24             | NM_001277229                    | chr10             | 41169937     | 41170446   | 29                           |
| Cirbp              | NM_007705                       | chr10             | 79630054     | 79631173   | 29                           |
| Ganab              | NM_001293621                    | chr19             | 8972328      | 8972821    | 29                           |
| Atp6v1c1           | NM_025494                       | chr15             | 38591275     | 38592099   | 29                           |
| C2cd5              | NM_001286578                    | chr6              | 143048385    | 143048899  | 29                           |
| Hey2               | NM_013904                       | chr10             | 30562180     | 30562937   | 30                           |
| Clk4               | NM_007714                       | chr11             | 51076412     | 51076991   | 30                           |
| Invs               | NM_010569                       | chr4              | 48292317     | 48293004   | 30                           |
| Pot1a              | NM_133931                       | chr6              | 25758955     | 25759436   | 30                           |
| Fanci              | NM_145946                       | chr7              | 86536896     | 86537609   | 30                           |
| Txlna              | NM_001005506                    | chr4              | 129317481    | 129318555  | 30                           |

**Supplemental Table 2. Significant ChIP-seq E2F1 promoter peaks  
(+/- 2kb from the TSS)**

| <b>Gene Symbol</b> | <b>Refseq<br/>Transcript ID</b> | <b>Chromosome</b> | <b>Start</b> | <b>End</b> | <b>distance<br/>from TSS</b> |
|--------------------|---------------------------------|-------------------|--------------|------------|------------------------------|
| Tipin              | NM_025372                       | chr9              | 64129165     | 64129721   | 30                           |
| Ppp2r5d            | NM_009358                       | chr17             | 46841649     | 46842190   | 31                           |
| Naa20              | NM_026425                       | chr2              | 145728805    | 145729208  | 31                           |
| Rab23              | NM_008999                       | chr1              | 33776498     | 33777044   | 31                           |
| Tpm3               | NM_001271764                    | chr3              | 89883233     | 89883713   | 31                           |
| Ankle2             | NM_027922                       | chr5              | 110659747    | 110660359  | 31                           |
| Serinc1            | NM_019760                       | chr10             | 57252037     | 57252568   | 32                           |
| 6330408A02Rik      | NM_177312                       | chr7              | 13863695     | 13864380   | 32                           |
| Bag4               | NM_026121                       | chr8              | 26895360     | 26895937   | 32                           |
| BC020402           | NR_033219                       | chr10             | 7400777      | 7401067    | 33                           |
| Nt5dc1             | NM_176968                       | chr10             | 34137951     | 34138649   | 33                           |
| Snrpd3             | NM_026095                       | chr10             | 74980450     | 74981188   | 33                           |
| Ube2g2             | NM_019803                       | chr10             | 77084808     | 77085388   | 33                           |
| Atf7               | NM_146065                       | chr15             | 102455409    | 102456227  | 33                           |
| Map1a              | NM_032393                       | chr2              | 121115152    | 121115588  | 33                           |
| Klhl32             | NM_001163020                    | chr4              | 24777802     | 24778596   | 33                           |
| Athl1              | NM_145387                       | chr7              | 148127275    | 148127749  | 33                           |
| Asb1               | NM_001039126                    | chr1              | 93436860     | 93437489   | 34                           |
| Opa1               | NM_133752                       | chr16             | 29579100     | 29579805   | 34                           |
| Atl3               | NM_146091                       | chr19             | 7568516      | 7569405    | 34                           |
| Adal               | NM_001290811                    | chr2              | 120965968    | 120966425  | 34                           |
| Idh3b              | NM_130884                       | chr2              | 130109944    | 130110361  | 34                           |
| Rps15              | NM_009091                       | chr10             | 79754710     | 79755708   | 34                           |
| Atp6v0c-ps2        | NR_037854                       | chr17             | 24306046     | 24306564   | 34                           |
| Snx5               | NM_001199188                    | chr2              | 144096283    | 144096923  | 34                           |
| Ubfd1              | NM_138589                       | chr7              | 129210558    | 129210932  | 34                           |
| 1810062O18Rik      | NR_033571                       | chr14             | 21365176     | 21365921   | 35                           |
| Gtse1              | NM_001168672                    | chr15             | 85689751     | 85690590   | 35                           |
| Dguok              | NM_013764                       | chr6              | 83456702     | 83457152   | 35                           |
| Gnb1l              | NM_001081682                    | chr16             | 18498349     | 18499332   | 36                           |
| Uap1l1             | NM_001033293                    | chr2              | 25220891     | 25221328   | 36                           |
| Kif20b             | NM_183046                       | chr19             | 34996493     | 34997273   | 36                           |
| Surf6              | NM_009298                       | chr2              | 26758049     | 26758543   | 36                           |
| Idh3g              | NM_008323                       | chrX              | 71031896     | 71032502   | 36                           |
| Mcm3               | NM_008563                       | chr1              | 20809880     | 20810633   | 37                           |
| Vcpkmt             | NM_001033236                    | chr12             | 70683528     | 70684427   | 37                           |
| B3galnt2           | NM_178640                       | chr13             | 14046787     | 14047166   | 37                           |
| Pcgf6              | NM_027654                       | chr19             | 47124925     | 47125670   | 37                           |
| Palb2              | NM_001081238                    | chr7              | 129276231    | 129276614  | 37                           |
| Tarbp2             | NM_009319                       | chr15             | 102348398    | 102348921  | 38                           |
| Slc9a3r1           | NM_012030                       | chr11             | 115024468    | 115024916  | 38                           |
| Dbr1               | NM_031403                       | chr9              | 99476060     | 99476450   | 38                           |
| Dynlrb1            | NM_001291108                    | chr2              | 155062094    | 155062670  | 39                           |
| Tbp                | NM_013684                       | chr17             | 15636462     | 15637320   | 40                           |
| Faf1               | NM_007983                       | chr4              | 109348944    | 109349598  | 40                           |
| Ctnna3             | NM_177612                       | chr10             | 62892625     | 62893146   | 41                           |
| Mob1b              | NM_026735                       | chr5              | 89149611     | 89150261   | 41                           |
| Ankra2             | NM_001271389                    | chr13             | 99032572     | 99033571   | 42                           |

**Supplemental Table 2. Significant ChIP-seq E2F1 promoter peaks  
(+/- 2kb from the TSS)**

| <b>Gene Symbol</b> | <b>Refseq<br/>Transcript ID</b> | <b>Chromosome</b> | <b>Start</b> | <b>End</b> | <b>distance<br/>from TSS</b> |
|--------------------|---------------------------------|-------------------|--------------|------------|------------------------------|
| Gnl3               | NM_153547                       | chr14             | 31832124     | 31832425   | 42                           |
| Tab1               | NM_025609                       | chr15             | 79963251     | 79963998   | 42                           |
| Rbm39              | NM_001291114                    | chr2              | 156005659    | 156006204  | 42                           |
| Pde12              | NM_178668                       | chr14             | 27488829     | 27489749   | 42                           |
| Casp7              | NM_007611                       | chr19             | 56471389     | 56471931   | 42                           |
| Ccne2              | NM_001037134                    | chr4              | 11118130     | 11118948   | 42                           |
| Pias3              | NM_146135                       | chr3              | 96500077     | 96500602   | 43                           |
| Wfs1               | NM_011716                       | chr5              | 37379778     | 37380577   | 43                           |
| Spice1             | NM_144550                       | chr16             | 44347141     | 44347971   | 43                           |
| Ccdc109b           | NM_025779                       | chr3              | 129672747    | 129673413  | 43                           |
| Pold3              | NM_133692                       | chr7              | 107269521    | 107270411  | 43                           |
| Cldn25             | NM_001252451                    | chr16             | 58727616     | 58728515   | 44                           |
| Foxred1            | NM_001291449                    | chr9              | 35018174     | 35019016   | 44                           |
| BC068281           | NM_001170858                    | chr12             | 4849925      | 4850381    | 45                           |
| Psmc4              | NM_011874                       | chr7              | 28834651     | 28835479   | 45                           |
| Mdga1              | NM_001081160                    | chr17             | 30024513     | 30025048   | 46                           |
| Eif3a              | NM_010123                       | chr19             | 60866324     | 60866775   | 46                           |
| Rps16              | NM_013647                       | chr7              | 29135482     | 29136023   | 46                           |
| Stk4               | NM_021420                       | chr2              | 163899708    | 163900210  | 46                           |
| Abhd11             | NM_001190437                    | chr5              | 135484658    | 135485476  | 46                           |
| Zdhhc7             | NM_133967                       | chr8              | 122625058    | 122625592  | 46                           |
| Tfam               | NM_009360                       | chr10             | 70700493     | 70700996   | 47                           |
| Aaas               | NM_153416                       | chr15             | 102180761    | 102181524  | 47                           |
| Tyw1               | NM_178897                       | chr5              | 130731259    | 130731810  | 47                           |
| Gpr19              | NM_001167700                    | chr6              | 134847648    | 134848142  | 47                           |
| Brip1              | NM_178309                       | chr11             | 86014292     | 86015001   | 48                           |
| Wdr70              | NM_001081402                    | chr15             | 8048700      | 8049621    | 48                           |
| Abhd8              | NM_022419                       | chr8              | 73987146     | 73987869   | 48                           |
| Mre11a             | NM_018736                       | chr9              | 14588858     | 14589537   | 48                           |
| Rmdn3              | NM_001033136                    | chr2              | 118982515    | 118982927  | 48                           |
| Pcyox1l            | NM_172832                       | chr18             | 61867023     | 61867456   | 49                           |
| Psmd5              | NM_080554                       | chr2              | 34726148     | 34726717   | 49                           |
| Cabin1             | NM_172549                       | chr10             | 75226726     | 75227378   | 49                           |
| Iqgap3             | NM_001033484                    | chr3              | 87885745     | 87886297   | 49                           |
| Polr2j             | NM_011293                       | chr5              | 136592178    | 136593040  | 49                           |
| Zbtb45             | NM_001024699                    | chr7              | 13594822     | 13595376   | 49                           |
| Sprtn              | NM_001111141                    | chr8              | 127421479    | 127422189  | 49                           |
| U2surp             | NM_026476                       | chr9              | 95411885     | 95412845   | 49                           |
| Coq6               | NM_172582                       | chr12             | 85702578     | 85703355   | 50                           |
| Vps13b             | NM_177151                       | chr15             | 35300945     | 35301754   | 50                           |
| 2010109A12Rik      | NM_029363                       | chr5              | 93635297     | 93635888   | 50                           |
| Mettl25            | NM_207522                       | chr10             | 105278114    | 105278656  | 50                           |
| Gm11974            | NR_045893                       | chr11             | 6428403      | 6429020    | 51                           |
| Hprt               | NM_013556                       | chrX              | 50341034     | 50341575   | 51                           |
| Exosc2             | NM_144886                       | chr2              | 31525849     | 31526765   | 51                           |
| Ncln               | NM_134009                       | chr10             | 80958805     | 80959306   | 52                           |
| Pip4k2c            | NM_054097                       | chr10             | 126648357    | 126648894  | 52                           |
| Zfp672             | NM_001256520                    | chr11             | 58143397     | 58144180   | 52                           |

**Supplemental Table 2. Significant ChIP-seq E2F1 promoter peaks  
(+/- 2kb from the TSS)**

| <b>Gene Symbol</b> | <b>Refseq<br/>Transcript ID</b> | <b>Chromosome</b> | <b>Start</b> | <b>End</b> | <b>distance<br/>from TSS</b> |
|--------------------|---------------------------------|-------------------|--------------|------------|------------------------------|
| Ssr1               | NM_025965                       | chr13             | 38085748     | 38086265   | 52                           |
| Rad1               | NM_001289447                    | chr15             | 10415438     | 10416249   | 52                           |
| Calm2              | NM_007589                       | chr17             | 87845686     | 87846759   | 52                           |
| 5430416N02Rik      | NR_034038                       | chr5              | 100858164    | 100858839  | 52                           |
| Tmem60             | NM_177601                       | chr5              | 20387966     | 20388678   | 52                           |
| Tbc1d14            | NM_001113364                    | chr5              | 36872934     | 36873504   | 52                           |
| Gm20604            | NM_001142939                    | chr12             | 103995537    | 103996396  | 53                           |
| Isy1               | NM_133934                       | chr6              | 87788278     | 87789121   | 53                           |
| Tusc3              | NM_030254                       | chr8              | 40068442     | 40069503   | 53                           |
| Zfp202             | NM_030713                       | chr9              | 39999661     | 40000244   | 53                           |
| Trip13             | NM_027182                       | chr13             | 74074730     | 74075591   | 54                           |
| Pck2               | NM_028994                       | chr14             | 56158676     | 56159635   | 54                           |
| Ssr3               | NM_026155                       | chr3              | 65195907     | 65196934   | 54                           |
| Blm                | NM_001042527                    | chr7              | 87679656     | 87680245   | 54                           |
| Qrs1               | NM_001081054                    | chr10             | 43621095     | 43621879   | 54                           |
| 2210408I21Rik      | NM_001145676                    | chr13             | 77274526     | 77275174   | 54                           |
| Cyb5d2             | NM_001024926                    | chr11             | 72608740     | 72609831   | 55                           |
| Ncdn               | NM_011986                       | chr4              | 126430360    | 126430875  | 55                           |
| Tgfbr2             | NM_029575                       | chr9              | 116084229    | 116084622  | 55                           |
| Hn1l               | NM_198937                       | chr17             | 25097201     | 25097823   | 55                           |
| Sf3b4              | NM_153053                       | chr3              | 95976352     | 95976702   | 55                           |
| Pcgf2              | NM_009545                       | chr11             | 97561521     | 97561988   | 56                           |
| Birc5              | NM_001012273                    | chr11             | 117710348    | 117710863  | 56                           |
| Incenp             | NM_016692                       | chr19             | 9973404      | 9974529    | 56                           |
| Slc25a11           | NM_024211                       | chr11             | 70460260     | 70460707   | 57                           |
| Cdkn3              | NM_028222                       | chr14             | 47379847     | 47380696   | 57                           |
| Msh6               | NM_010830                       | chr17             | 88374029     | 88374863   | 57                           |
| Ppox               | NM_008911                       | chr1              | 173210852    | 173211665  | 58                           |
| Rad9a              | NM_011237                       | chr19             | 4201283      | 4201805    | 58                           |
| Fkbp2              | NM_008020                       | chr19             | 7054611      | 7055131    | 58                           |
| Dap                | NM_146057                       | chr15             | 31153785     | 31154610   | 59                           |
| Ranbp3             | NM_001252467                    | chr17             | 56812254     | 56813157   | 59                           |
| Toporsos           | NR_045265                       | chr4              | 40216273     | 40217066   | 59                           |
| Eapp               | NM_025456                       | chr12             | 55796505     | 55797079   | 59                           |
| Mapk8ip3           | NM_001163451                    | chr17             | 25073631     | 25074093   | 59                           |
| Pcdh18             | NM_130448                       | chr3              | 49560783     | 49561573   | 59                           |
| Insig1             | NM_153526                       | chr5              | 28397569     | 28398451   | 59                           |
| Nfya               | NM_001110832                    | chr17             | 48548198     | 48549970   | 60                           |
| Mphosph9           | NM_001081323                    | chr5              | 124777462    | 124778378  | 60                           |
| Mcm2               | NM_008564                       | chr6              | 88848506     | 88848920   | 60                           |
| Atp5g2             | NM_026468                       | chr15             | 102501048    | 102501785  | 61                           |
| Nup62              | NM_053074                       | chr7              | 52071430     | 52072269   | 61                           |
| Nav2               | NM_175272                       | chr7              | 56501330     | 56501907   | 61                           |
| Zfp90              | NM_011764                       | chr8              | 108938911    | 108939686  | 61                           |
| Ppil4              | NM_026141                       | chr10             | 7512428      | 7513076    | 61                           |
| Gabpb2             | NM_172512                       | chr3              | 95021367     | 95022237   | 61                           |
| Tm9sf2             | NM_080556                       | chr14             | 122506100    | 122506629  | 62                           |
| Prkag1             | NM_016781                       | chr15             | 98661514     | 98662239   | 62                           |



**Supplemental Table 2. Significant ChIP-seq E2F1 promoter peaks  
(+/- 2kb from the TSS)**

| <b>Gene Symbol</b> | <b>Refseq<br/>Transcript ID</b> | <b>Chromosome</b> | <b>Start</b> | <b>End</b> | <b>distance<br/>from TSS</b> |
|--------------------|---------------------------------|-------------------|--------------|------------|------------------------------|
| Mrpl43             | NM_053164                       | chr19             | 45080544     | 45081195   | 62                           |
| Ankle1             | NM_172756                       | chr8              | 73929731     | 73930212   | 62                           |
| Ap1s2              | NM_001290379                    | chrX              | 160346705    | 160347314  | 62                           |
| Gcc2               | NM_027375                       | chr10             | 57718025     | 57718646   | 63                           |
| Mis12              | NM_025993                       | chr11             | 70832786     | 70833563   | 63                           |
| Pitrm1             | NM_145131                       | chr13             | 6547126      | 6547803    | 63                           |
| Blvrb              | NM_144923                       | chr7              | 28232836     | 28233281   | 63                           |
| Eldr               | NR_110421                       | chr11             | 16850900     | 16851542   | 63                           |
| Ykt6               | NM_019661                       | chr11             | 5855464      | 5856183    | 64                           |
| Gm5464             | NM_001034881                    | chr14             | 67487302     | 67488197   | 64                           |
| Bckdk              | NM_009739                       | chr7              | 135047464    | 135047835  | 64                           |
| Gm2694             | NR_033430                       | chr8              | 89996383     | 89997164   | 64                           |
| Nono               | NM_023144                       | chrX              | 98624809     | 98625296   | 64                           |
| Gtf2a1             | NM_175335                       | chr12             | 92828574     | 92829150   | 64                           |
| Mmgt1              | NM_146234                       | chrX              | 53850717     | 53851345   | 64                           |
| Tob2               | NM_020507                       | chr15             | 81688365     | 81689016   | 65                           |
| Wdr25              | NM_177602                       | chr12             | 110132316    | 110132776  | 65                           |
| Endov              | NM_001164636                    | chr11             | 119352313    | 119353139  | 66                           |
| Chka               | NM_001271496                    | chr19             | 3851636      | 3852041    | 67                           |
| Trim28             | NM_011588                       | chr7              | 13609177     | 13609956   | 67                           |
| Loh12cr1           | NM_026371                       | chr6              | 134590749    | 134591299  | 67                           |
| Glt25d1            | NM_146211                       | chr8              | 74134809     | 74135169   | 67                           |
| Med23              | NM_027347                       | chr10             | 24589564     | 24590153   | 68                           |
| Hist1h4f           | NM_175655                       | chr13             | 23643097     | 23643790   | 68                           |
| Ikbip              | NM_027078                       | chr10             | 90545578     | 90546124   | 68                           |
| Secisbp2           | NM_029279                       | chr13             | 51746834     | 51747466   | 68                           |
| Rbm6               | NM_029169                       | chr9              | 107774816    | 107775346  | 68                           |
| Cd2ap              | NM_009847                       | chr17             | 43012742     | 43013865   | 69                           |
| Nfx1               | NM_023739                       | chr4              | 40917733     | 40918354   | 69                           |
| Osbp19             | NM_133885                       | chr4              | 108874385    | 108875230  | 69                           |
| Nuf2               | NM_023284                       | chr1              | 171461288    | 171461762  | 69                           |
| Gzf1               | NM_028986                       | chr2              | 148506482    | 148507366  | 69                           |
| Ccdc57             | NM_027745                       | chr11             | 120793780    | 120794451  | 70                           |
| Clpp               | NM_017393                       | chr17             | 57129384     | 57130128   | 70                           |
| Mtap               | NM_024433                       | chr4              | 88782928     | 88783758   | 70                           |
| Uba2               | NM_016682                       | chr7              | 34953074     | 34953880   | 70                           |
| Figl1              | NM_001163359                    | chr11             | 11708439     | 11709348   | 71                           |
| Slc20a1            | NM_015747                       | chr2              | 129024026    | 129025131  | 71                           |
| Naglu              | NM_013792                       | chr11             | 100931192    | 100931764  | 71                           |
| Cherp              | NM_138585                       | chr8              | 74998572     | 74999548   | 71                           |
| Frmd6              | NM_028127                       | chr12             | 71926375     | 71926768   | 72                           |
| Pdcd6              | NM_011051                       | chr13             | 74454448     | 74454955   | 72                           |
| Epg5               | NM_001195633                    | chr18             | 78134947     | 78135606   | 72                           |
| Agpat5             | NM_026792                       | chr8              | 18845973     | 18846726   | 72                           |
| Acad8              | NM_025862                       | chr9              | 26806726     | 26807396   | 72                           |
| Nfyc               | NM_001277095                    | chr4              | 120497885    | 120498659  | 73                           |
| Tsen54             | NM_029557                       | chr11             | 115675755    | 115676497  | 74                           |
| Hira               | NM_010435                       | chr16             | 18876350     | 18877482   | 74                           |

**Supplemental Table 2. Significant ChIP-seq E2F1 promoter peaks  
(+/- 2kb from the TSS)**

| <b>Gene Symbol</b> | <b>Refseq<br/>Transcript ID</b> | <b>Chromosome</b> | <b>Start</b> | <b>End</b> | <b>distance<br/>from TSS</b> |
|--------------------|---------------------------------|-------------------|--------------|------------|------------------------------|
| Haus4              | NM_145462                       | chr14             | 55172681     | 55173564   | 75                           |
| Cyb5r3             | NM_029787                       | chr15             | 83002208     | 83002917   | 75                           |
| Dars2              | NM_172644                       | chr1              | 163000256    | 163001118  | 75                           |
| Tubb5              | NM_011655                       | chr17             | 35974876     | 35975464   | 75                           |
| Lbh                | NM_029999                       | chr17             | 73267359     | 73268080   | 76                           |
| Saal1              | NM_030233                       | chr7              | 53965624     | 53966265   | 76                           |
| Wrap53             | NM_144824                       | chr11             | 69392470     | 69393028   | 76                           |
| Smek1              | NM_211355                       | chr12             | 102321490    | 102322180  | 76                           |
| Mrps27             | NM_173757                       | chr13             | 100114542    | 100115090  | 76                           |
| Slc25a32           | NM_172402                       | chr15             | 38943663     | 38944706   | 77                           |
| Sh3gl1             | NM_013664                       | chr17             | 56175530     | 56176435   | 77                           |
| Maml3              | NM_001004176                    | chr3              | 51908478     | 51909223   | 77                           |
| Pbdc1              | NM_001281871                    | chrX              | 102274802    | 102275539  | 77                           |
| Ipo9               | NM_153774                       | chr1              | 137326533    | 137327446  | 78                           |
| Spsb1              | NM_029035                       | chr4              | 149328720    | 149329353  | 78                           |
| Lfng               | NM_008494                       | chr5              | 141083129    | 141083614  | 78                           |
| Elmod2             | NM_178736                       | chr8              | 85855756     | 85856857   | 78                           |
| Ccdc15             | NM_001081429                    | chr9              | 37155642     | 37156155   | 78                           |
| Hexdc              | NM_001001333                    | chr11             | 121065514    | 121066134  | 78                           |
| Urgcp              | NM_001077661                    | chr11             | 5662009      | 5662590    | 79                           |
| Brca1              | NM_009764                       | chr11             | 101412875    | 101413503  | 79                           |
| Tecpr2             | NM_001289510                    | chr12             | 112127204    | 112127900  | 79                           |
| Poglut1            | NM_172380                       | chr16             | 38549837     | 38550535   | 79                           |
| Aldh18a1           | NM_019698                       | chr19             | 40662595     | 40663151   | 79                           |
| Slbp               | NM_001289724                    | chr5              | 33994787     | 33995499   | 79                           |
| Eny2               | NM_175009                       | chr15             | 44259097     | 44260374   | 80                           |
| Ipo8               | NM_001081113                    | chr6              | 148779360    | 148780457  | 80                           |
| Dna2               | NM_177372                       | chr10             | 62409438     | 62410274   | 80                           |
| Ift140             | NM_134126                       | chr17             | 25152532     | 25153688   | 80                           |
| Mat2b              | NM_134017                       | chr11             | 40505695     | 40506510   | 81                           |
| Msh2               | NM_008628                       | chr17             | 88071506     | 88072447   | 81                           |
| Prpf4              | NM_027297                       | chr4              | 62069469     | 62070324   | 81                           |
| Prim2              | NM_008922                       | chr1              | 33726214     | 33726900   | 81                           |
| Mfsd5              | NM_134100                       | chr15             | 102109614    | 102110320  | 81                           |
| Tubgcp3            | NM_198031                       | chr8              | 12671649     | 12672387   | 81                           |
| Aagab              | NM_025857                       | chr9              | 63450132     | 63450953   | 82                           |
| Nop58              | NM_018868                       | chr1              | 59741560     | 59742303   | 83                           |
| Slc25a10           | NM_013770                       | chr11             | 120352993    | 120353473  | 83                           |
| Zfp664             | NM_001081750                    | chr5              | 125342781    | 125343533  | 83                           |
| 2700094K13Rik      | NM_001033166                    | chr2              | 84510408     | 84511153   | 84                           |
| Lrrc40             | NM_024194                       | chr3              | 157699330    | 157700127  | 84                           |
| Snapc2             | NM_133968                       | chr8              | 4252862      | 4253507    | 84                           |
| Uchl5              | NM_001159866                    | chr1              | 145624183    | 145624799  | 84                           |
| Smarcd1            | NM_031842                       | chr15             | 99532362     | 99533241   | 85                           |
| Gins4              | NM_024240                       | chr8              | 24347706     | 24348403   | 85                           |
| Tmod3              | NM_016963                       | chr9              | 75406970     | 75407787   | 85                           |
| Dpp9               | NM_172624                       | chr17             | 56357942     | 56358510   | 85                           |
| Lrrcc1             | NM_028915                       | chr3              | 14533562     | 14534182   | 85                           |

**Supplemental Table 2. Significant ChIP-seq E2F1 promoter peaks  
(+/- 2kb from the TSS)**

| <b>Gene Symbol</b> | <b>Refseq<br/>Transcript ID</b> | <b>Chromosome</b> | <b>Start</b> | <b>End</b> | <b>distance<br/>from TSS</b> |
|--------------------|---------------------------------|-------------------|--------------|------------|------------------------------|
| Abcf2              | NM_001190443                    | chr5              | 24082918     | 24083480   | 85                           |
| Armc8              | NM_028768                       | chr9              | 99468840     | 99469624   | 85                           |
| Xrcc5              | NM_009533                       | chr1              | 72353846     | 72354313   | 86                           |
| Zswim7             | NM_027198                       | chr11             | 62094481     | 62095140   | 86                           |
| Rnaseh2b           | NM_026001                       | chr14             | 62950603     | 62951450   | 86                           |
| Appl2              | NM_145220                       | chr10             | 83110946     | 83111698   | 86                           |
| Adam17             | NM_001291871                    | chr12             | 21379067     | 21379745   | 86                           |
| Dek                | NM_025900                       | chr13             | 47201063     | 47201941   | 86                           |
| Pkmyt1             | NM_023058                       | chr17             | 23863094     | 23863682   | 86                           |
| 9430038I01Rik      | NM_029886                       | chr7              | 144602029    | 144602675  | 86                           |
| Ap1g1              | NM_009677                       | chr8              | 112302326    | 112302924  | 86                           |
| AA465934           | NR_028363                       | chr11             | 83104980     | 83105593   | 87                           |
| Chtop              | NM_001293780                    | chr3              | 90313031     | 90313632   | 88                           |
| Cltb               | NM_028870                       | chr13             | 54712283     | 54712805   | 88                           |
| Wasl               | NM_028459                       | chr6              | 24614557     | 24615255   | 88                           |
| Foxm1              | NM_008021                       | chr6              | 128312776    | 128313423  | 89                           |
| Nol9               | NM_028727                       | chr4              | 151413314    | 151413734  | 89                           |
| Polr2m             | NM_178602                       | chr9              | 71333239     | 71334161   | 89                           |
| Rangap1            | NM_001146174                    | chr15             | 81559699     | 81560818   | 90                           |
| Cdc7               | NM_001271568                    | chr5              | 107392883    | 107393976  | 90                           |
| Tbc1d22b           | NM_198647                       | chr17             | 29686491     | 29687181   | 90                           |
| Ddx39b             | NM_019693                       | chr17             | 35378271     | 35379289   | 90                           |
| 4930555B11Rik      | NR_040633                       | chr2              | 57034021     | 57034641   | 90                           |
| Snrpb              | NM_009225                       | chr2              | 130004704    | 130005314  | 90                           |
| Zbtb11             | NM_173026                       | chr16             | 55973687     | 55974326   | 91                           |
| Nhp2l1             | NM_011482                       | chr15             | 81877593     | 81878279   | 91                           |
| Rtn3               | NM_001003934                    | chr19             | 7557460      | 7557918    | 91                           |
| Mrpl46             | NM_023331                       | chr7              | 85927533     | 85928233   | 91                           |
| Cyb5b              | NM_025558                       | chr8              | 109674219    | 109675083  | 91                           |
| Tardbp             | NM_001008546                    | chr4              | 148000676    | 148001349  | 92                           |
| Zfp784             | NM_001039532                    | chr7              | 4989663      | 4990247    | 92                           |
| Tor1a              | NM_144884                       | chr2              | 30822815     | 30823874   | 93                           |
| Mtf2               | NM_013827                       | chr5              | 108494497    | 108495072  | 93                           |
| Serpinb6a          | NM_001243192                    | chr13             | 34094295     | 34094843   | 93                           |
| Zfp346             | NM_012017                       | chr13             | 55206414     | 55207111   | 94                           |
| Pigp               | NM_001159618                    | chr16             | 94591725     | 94592400   | 94                           |
| Ssna1              | NM_023464                       | chr2              | 25127570     | 25128117   | 94                           |
| Srrm1              | NM_001130477                    | chr4              | 134908732    | 134909336  | 94                           |
| Exo1               | NM_012012                       | chr1              | 177810636    | 177811369  | 95                           |
| Nup107             | NM_134010                       | chr10             | 117229280    | 117230050  | 95                           |
| Nin                | NM_008697                       | chr12             | 71212624     | 71213228   | 95                           |
| Cdca2              | NM_175384                       | chr14             | 68333030     | 68334574   | 95                           |
| Ddx23              | NM_001080981                    | chr15             | 98492836     | 98493612   | 95                           |
| Orc1               | NM_011015                       | chr4              | 108251824    | 108252482  | 95                           |
| Sars               | NM_011319                       | chr3              | 108247768    | 108248393  | 96                           |
| Mapk1              | NM_011949                       | chr16             | 16983206     | 16983934   | 96                           |
| Fancl              | NM_001277273                    | chr11             | 26286697     | 26287662   | 97                           |
| Hnrnpul2           | NM_001081196                    | chr19             | 8893115      | 8894858    | 97                           |

**Supplemental Table 2. Significant ChIP-seq E2F1 promoter peaks  
(+/- 2kb from the TSS)**

| <b>Gene Symbol</b> | <b>Refseq<br/>Transcript ID</b> | <b>Chromosome</b> | <b>Start</b> | <b>End</b> | <b>distance<br/>from TSS</b> |
|--------------------|---------------------------------|-------------------|--------------|------------|------------------------------|
| Psmg3              | NM_025604                       | chr5              | 140302379    | 140303020  | 97                           |
| Odf2l              | NM_025714                       | chr3              | 144781321    | 144781999  | 97                           |
| Mms22l             | NM_199467                       | chr4              | 24423366     | 24424044   | 97                           |
| Ptpru              | NM_001083119                    | chr4              | 131393839    | 131394350  | 98                           |
| Trnt1              | NM_001242358                    | chr6              | 106718898    | 106719559  | 98                           |
| Thoc3              | NM_028597                       | chr13             | 54569749     | 54570455   | 98                           |
| Puf60              | NM_001164600                    | chr15             | 75910887     | 75911515   | 98                           |
| Ubxn8              | NM_178648                       | chr8              | 34751954     | 34752744   | 98                           |
| Xrcc6              | NM_010247                       | chr15             | 81846575     | 81847218   | 99                           |
| Rabl3              | NM_001042499                    | chr16             | 37539737     | 37540418   | 99                           |
| Rab14              | NM_026697                       | chr2              | 35056266     | 35056815   | 99                           |
| Hexa               | NM_010421                       | chr9              | 59387177     | 59387967   | 99                           |
| Mns1               | NM_008613                       | chr9              | 72286106     | 72286762   | 99                           |
| Yars               | NM_134151                       | chr4              | 128866847    | 128867428  | 100                          |
| Chchd5             | NM_025395                       | chr2              | 128955171    | 128955901  | 101                          |
| Vkorc1             | NM_178600                       | chr7              | 135038752    | 135039306  | 101                          |
| Dnph1              | NM_207161                       | chr17             | 46633420     | 46634257   | 102                          |
| Tex10              | NM_172304                       | chr4              | 48485858     | 48486525   | 102                          |
| Med28              | NM_025895                       | chr5              | 45911300     | 45911837   | 102                          |
| Aimp2              | NM_001172146                    | chr5              | 144670163    | 144671048  | 102                          |
| Tbcd               | NM_029878                       | chr11             | 121313067    | 121313662  | 103                          |
| Slc29a1            | NM_001199116                    | chr17             | 45731982     | 45732853   | 103                          |
| Sars2              | NM_023637                       | chr7              | 29526764     | 29527413   | 103                          |
| Ddx19a             | NM_007916                       | chr8              | 113521176    | 113522063  | 103                          |
| Mir423             | NR_030756                       | chr11             | 76891272     | 76891868   | 103                          |
| Rhebl1             | NM_026967                       | chr15             | 98711228     | 98712254   | 103                          |
| Zfp414             | NM_026712                       | chr17             | 33765728     | 33766550   | 103                          |
| Cntrob             | NM_172560                       | chr11             | 69136862     | 69137679   | 104                          |
| C030039L03Rik      | NM_001112731                    | chr7              | 28474284     | 28474639   | 104                          |
| Cox7a2             | NM_009945                       | chr9              | 79607154     | 79607957   | 104                          |
| Gins3              | NM_030198                       | chr8              | 98157231     | 98157893   | 104                          |
| Pigg               | NM_001081234                    | chr5              | 108741654    | 108742441  | 105                          |
| Phf6               | NM_027642                       | chrX              | 50265244     | 50265745   | 105                          |
| Mdm2               | NM_001288586                    | chr10             | 117147377    | 117148039  | 105                          |
| Mrpl55             | NM_026035                       | chr11             | 59015790     | 59016456   | 105                          |
| Rpl10a             | NM_011287                       | chr17             | 28465335     | 28465705   | 105                          |
| Pms1               | NM_153556                       | chr1              | 53353275     | 53354192   | 106                          |
| Polr2e             | NM_025554                       | chr10             | 79501847     | 79502748   | 106                          |
| Dab2               | NM_001037905                    | chr15             | 6336407      | 6337298    | 106                          |
| Rbbp6              | NM_011247                       | chr7              | 130113970    | 130114395  | 106                          |
| Asb3               | NM_023906                       | chr11             | 30854292     | 30854714   | 106                          |
| Lmnb2              | NM_010722                       | chr10             | 80380557     | 80381208   | 107                          |
| Mut                | NM_008650                       | chr17             | 41071343     | 41072137   | 107                          |
| Mnd1               | NM_029797                       | chr3              | 83959351     | 83959849   | 107                          |
| Cdt1               | NM_026014                       | chr8              | 125091588    | 125092454  | 107                          |
| D10Wsu102e         | NM_026579                       | chr10             | 82822753     | 82823392   | 108                          |
| Wdr76              | NM_001290986                    | chr2              | 121332286    | 121332847  | 109                          |
| Tmem2              | NM_031997                       | chr19             | 21852657     | 21853219   | 109                          |

**Supplemental Table 2. Significant ChIP-seq E2F1 promoter peaks (+/- 2kb from the TSS)**

| <b>Gene Symbol</b> | <b>Refseq Transcript ID</b> | <b>Chromosome</b> | <b>Start</b> | <b>End</b> | <b>distance from TSS</b> |
|--------------------|-----------------------------|-------------------|--------------|------------|--------------------------|
| Oser1              | NM_025699                   | chr2              | 163244688    | 163245504  | 109                      |
| Wrnip1             | NM_030215                   | chr13             | 32893546     | 32894470   | 110                      |
| 9130011E15Rik      | NM_198296                   | chr19             | 46072610     | 46073124   | 110                      |
| Eefsec             | NM_023060                   | chr6              | 88396066     | 88396778   | 110                      |
| Cisd1              | NM_134007                   | chr10             | 70807050     | 70807920   | 111                      |
| Csrp2              | NM_007792                   | chr10             | 110356961    | 110357723  | 111                      |
| Pno1               | NM_025443                   | chr11             | 17111166     | 17111794   | 111                      |
| Smc6               | NM_025695                   | chr12             | 11272309     | 11273295   | 111                      |
| Cdc25b             | NM_023117                   | chr2              | 131012426    | 131013162  | 111                      |
| Actn4              | NM_021895                   | chr7              | 29746782     | 29747592   | 111                      |
| Hnrnp3             | NM_001079824                | chr10             | 62486013     | 62486956   | 112                      |
| Gtf3c2             | NM_027901                   | chr5              | 31481984     | 31482823   | 113                      |
| Zfp91Cntf          | NR_024093                   | chr19             | 12869996     | 12871000   | 114                      |
| Gne                | NM_001190414                | chr4              | 44085148     | 44085712   | 114                      |
| Phf20              | NM_172674                   | chr2              | 156021988    | 156023005  | 115                      |
| Irx5               | NM_018826                   | chr8              | 94881393     | 94882224   | 115                      |
| Slc1a5             | NM_009201                   | chr7              | 17366470     | 17367148   | 115                      |
| Pofut2             | NM_030262                   | chr10             | 76721849     | 76722470   | 116                      |
| Fam173b            | NM_026546                   | chr15             | 31531489     | 31532483   | 116                      |
| Idi1               | NM_145360                   | chr13             | 8884650      | 8885285    | 117                      |
| Cad                | NM_023525                   | chr5              | 31357016     | 31357522   | 117                      |
| Chrac1             | NM_053068                   | chr15             | 72920673     | 72921245   | 118                      |
| Polg2              | NR_027785                   | chr11             | 106640391    | 106641027  | 119                      |
| Nras               | NM_010937                   | chr3              | 102862065    | 102862587  | 119                      |
| Mrpl42             | NM_026065                   | chr10             | 94964054     | 94964827   | 120                      |
| Zgpat              | NM_001048148                | chr2              | 181099914    | 181100579  | 120                      |
| Ercc6              | NM_001081221                | chr14             | 33326500     | 33327152   | 120                      |
| Riok2              | NM_025934                   | chr17             | 17510914     | 17511917   | 121                      |
| Hirip3             | NM_172746                   | chr7              | 134005227    | 134005985  | 121                      |
| Gdi1               | NM_010273                   | chrX              | 71550172     | 71550770   | 121                      |
| Gemin4             | NM_177367                   | chr11             | 76030662     | 76031241   | 122                      |
| Acat2              | NM_009338                   | chr17             | 13153128     | 13153809   | 122                      |
| Fkbp3              | NM_013902                   | chr12             | 66174477     | 66175127   | 122                      |
| Ndufaf2            | NM_001127346                | chr13             | 108948344    | 108949048  | 122                      |
| Tmem186            | NM_025708                   | chr16             | 8637160      | 8638182    | 122                      |
| Nup35              | NM_027091                   | chr2              | 80478785     | 80479397   | 123                      |
| Cbx5               | NM_007626                   | chr15             | 103045288    | 103046029  | 124                      |
| Sfxn5              | NM_178639                   | chr6              | 85282942     | 85283641   | 124                      |
| Naaa               | NM_001163687                | chr5              | 92706707     | 92707457   | 124                      |
| Med12              | NM_021521                   | chrX              | 98469250     | 98469856   | 124                      |
| Scamp4             | NM_019575                   | chr10             | 80065498     | 80066003   | 125                      |
| Cox10              | NM_178379                   | chr11             | 63892525     | 63893172   | 125                      |
| Cipc               | NM_001289430                | chr12             | 88287829     | 88288400   | 125                      |
| Smc5               | NM_001252684                | chr19             | 23347979     | 23348544   | 125                      |
| 4930528A17Rik      | NR_028384                   | chr4              | 21775010     | 21775928   | 125                      |
| 2510003E04Rik      | NM_028197                   | chr10             | 62040812     | 62041345   | 126                      |
| Ajuba              | NM_010590                   | chr14             | 55196086     | 55196656   | 126                      |
| Mrto4              | NM_001290810                | chr4              | 138908044    | 138908684  | 126                      |

**Supplemental Table 2. Significant ChIP-seq E2F1 promoter peaks  
(+/- 2kb from the TSS)**

| <b>Gene Symbol</b> | <b>Refseq<br/>Transcript ID</b> | <b>Chromosome</b> | <b>Start</b> | <b>End</b> | <b>distance<br/>from TSS</b> |
|--------------------|---------------------------------|-------------------|--------------|------------|------------------------------|
| Vmn2r29            | NR_003555                       | chr7              | 7230508      | 7231238    | 126                          |
| Rad51c             | NM_053269                       | chr11             | 87217495     | 87218244   | 127                          |
| Man2c1             | NM_028636                       | chr9              | 56978406     | 56979014   | 127                          |
| Socs2              | NM_001168655                    | chr10             | 94878455     | 94878980   | 128                          |
| E2f6               | NM_033270                       | chr12             | 16817518     | 16818278   | 128                          |
| Trmt2b             | NM_172540                       | chrX              | 130811124    | 130811663  | 129                          |
| Fars2              | NM_024274                       | chr13             | 36209241     | 36210039   | 129                          |
| Nmral1             | NM_001290761                    | chr16             | 4718913      | 4719539    | 129                          |
| Rab31              | NM_133685                       | chr17             | 66121681     | 66122243   | 129                          |
| Papss1             | NM_011863                       | chr3              | 131227416    | 131228304  | 129                          |
| Rnps1              | NM_001080128                    | chr17             | 24551243     | 24552254   | 130                          |
| 2500004C02Rik      | NR_040318                       | chr2              | 153171026    | 153171805  | 130                          |
| Zfp81              | NM_207541                       | chr17             | 33495400     | 33495981   | 132                          |
| 5830415F09Rik      | NM_029086                       | chr4              | 46401835     | 46402490   | 132                          |
| Ckap2              | NM_001004140                    | chr8              | 23295881     | 23296436   | 132                          |
| Enkd1              | NM_198299                       | chr8              | 108231668    | 108232203  | 132                          |
| Erp29              | NM_026129                       | chr5              | 121902166    | 121902533  | 133                          |
| E2f7               | NM_178609                       | chr10             | 110182136    | 110183170  | 133                          |
| Hadhb              | NM_145558                       | chr5              | 30481563     | 30482287   | 133                          |
| Naa16              | NM_025832                       | chr14             | 79789904     | 79790776   | 134                          |
| Myg1               | NM_021713                       | chr15             | 102161948    | 102162598  | 134                          |
| Tfb1m              | NM_146074                       | chr17             | 3556979      | 3558177    | 134                          |
| Naa40              | NM_027643                       | chr19             | 7315254      | 7315900    | 134                          |
| Neu1               | NM_010893                       | chr17             | 35068062     | 35068601   | 135                          |
| Myh10              | NM_175260                       | chr11             | 68505295     | 68505809   | 136                          |
| Ing3               | NM_023626                       | chr6              | 21899434     | 21900066   | 136                          |
| Fancc              | NM_001042673                    | chr13             | 63532656     | 63533175   | 137                          |
| Phactr4            | NM_001161797                    | chr4              | 131977755    | 131978691  | 137                          |
| Exog               | NM_001172136                    | chr9              | 119353794    | 119354560  | 137                          |
| Nxt1               | NM_001110159                    | chr2              | 148498114    | 148498913  | 138                          |
| L3mbtl2            | NM_145993                       | chr15             | 81494100     | 81494812   | 138                          |
| Arpp19             | NM_021548                       | chr9              | 74885312     | 74886040   | 138                          |
| Eif4h              | NM_033561                       | chr5              | 135114827    | 135115290  | 139                          |
| Tmed3              | NM_025360                       | chr9              | 89599432     | 89600051   | 139                          |
| Kif15              | NM_010620                       | chr9              | 122859950    | 122860723  | 139                          |
| Trim16             | NM_053169                       | chr11             | 62633534     | 62634254   | 140                          |
| Gar1               | NM_026578                       | chr3              | 129533862    | 129534484  | 140                          |
| Nufip1             | NM_013745                       | chr14             | 76510546     | 76511129   | 141                          |
| Rad51              | NM_011234                       | chr2              | 118938382    | 118939003  | 141                          |
| Rabep2             | NM_030566                       | chr7              | 133572133    | 133572709  | 141                          |
| Cenpj              | NM_001014996                    | chr14             | 57190059     | 57191021   | 142                          |
| Dnajb12            | NM_019965                       | chr10             | 59341808     | 59343153   | 143                          |
| Mum1               | NM_023431                       | chr10             | 79689185     | 79689784   | 143                          |
| Inip               | NM_001013577                    | chr4              | 59796259     | 59796908   | 143                          |
| Tpx2               | NM_028109                       | chr2              | 152673545    | 152674139  | 143                          |
| Myc                | NM_001177353                    | chr15             | 61816671     | 61817407   | 144                          |
| Igf2bp1            | NM_009951                       | chr11             | 95866779     | 95867446   | 145                          |
| Emd                | NM_007927                       | chrX              | 71499905     | 71500434   | 145                          |

**Supplemental Table 2. Significant ChIP-seq E2F1 promoter peaks  
(+/- 2kb from the TSS)**

| <b>Gene Symbol</b> | <b>Refseq<br/>Transcript ID</b> | <b>Chromosome</b> | <b>Start</b> | <b>End</b> | <b>distance<br/>from TSS</b> |
|--------------------|---------------------------------|-------------------|--------------|------------|------------------------------|
| Cenpa              | NM_007681                       | chr5              | 30969081     | 30969757   | 145                          |
| Cep164             | NM_001081373                    | chr9              | 45636105     | 45637045   | 145                          |
| Cnot10             | NM_153585                       | chr9              | 114548863    | 114549480  | 146                          |
| Sept10             | NM_001024910                    | chr10             | 58683857     | 58685039   | 146                          |
| Thrap3             | NM_146153                       | chr4              | 125879371    | 125880243  | 146                          |
| Rtfdc1             | NM_025542                       | chr2              | 172265899    | 172266548  | 147                          |
| Sdha               | NM_023281                       | chr13             | 74487261     | 74487819   | 147                          |
| Cct6a              | NM_009838                       | chr5              | 130292967    | 130293789  | 147                          |
| Shcbp1             | NM_011369                       | chr8              | 4778974      | 4779798    | 147                          |
| Snrpe              | NM_009227                       | chr1              | 135506256    | 135507161  | 148                          |
| Trim37             | NM_197987                       | chr11             | 86940196     | 86941252   | 148                          |
| Fadd               | NM_010175                       | chr7              | 151767724    | 151768660  | 148                          |
| Usp38              | NM_027554                       | chr8              | 83538196     | 83539116   | 148                          |
| Snw1               | NM_025507                       | chr12             | 88812817     | 88813382   | 149                          |
| Tpst1              | NM_001130476                    | chr5              | 130554965    | 130555810  | 149                          |
| Tkt                | NM_009388                       | chr14             | 31362016     | 31362914   | 149                          |
| Pde4dip            | NM_178080                       | chr3              | 97571484     | 97572090   | 149                          |
| Sdf2l1             | NM_022324                       | chr16             | 17131951     | 17132700   | 150                          |
| Pla2g6             | NM_016915                       | chr15             | 79158410     | 79158888   | 151                          |
| Them6              | NM_198607                       | chr15             | 74551273     | 74552356   | 152                          |
| Umps               | NM_009471                       | chr16             | 33966612     | 33967261   | 152                          |
| Srsf7              | NM_146083                       | chr17             | 80605760     | 80607225   | 152                          |
| Vps16              | NM_030559                       | chr2              | 130249620    | 130250793  | 152                          |
| Haus8              | NM_029621                       | chr8              | 73795764     | 73796909   | 152                          |
| Fam204a            | NM_029648                       | chr19             | 60302169     | 60302725   | 152                          |
| Mars               | NM_001171582                    | chr10             | 126748337    | 126749040  | 153                          |
| Impa2              | NM_053261                       | chr18             | 67448586     | 67449471   | 153                          |
| Cul7               | NM_025611                       | chr17             | 46787041     | 46787837   | 153                          |
| 1700021K19Rik      | NM_172615                       | chr16             | 32867804     | 32868791   | 154                          |
| Mea1               | NM_001277310                    | chr17             | 46817278     | 46817831   | 154                          |
| 2310022A10Rik      | NM_175107                       | chr7              | 28338090     | 28338833   | 154                          |
| Eif3d              | NM_018749                       | chr15             | 77800408     | 77801790   | 154                          |
| Recql4             | NM_058214                       | chr15             | 76540524     | 76541143   | 155                          |
| Commd1             | NM_144514                       | chr11             | 22881822     | 22882433   | 156                          |
| Tmem11             | NM_001168507                    | chr11             | 60692048     | 60692719   | 156                          |
| Khynyn             | NM_027143                       | chr14             | 56503552     | 56504369   | 156                          |
| Rrp1b              | NM_028244                       | chr17             | 32172739     | 32173785   | 156                          |
| Ddx39              | NM_197982                       | chr8              | 86238768     | 86239694   | 156                          |
| Zfp560             | NM_001004190                    | chr9              | 20189058     | 20189832   | 156                          |
| Orc2               | NM_001271526                    | chr1              | 58561489     | 58562102   | 157                          |
| Med18              | NM_026039                       | chr4              | 132019298    | 132020059  | 157                          |
| Irak1bp1           | NM_001168240                    | chr9              | 82723395     | 82723742   | 157                          |
| Cactin             | NM_027381                       | chr10             | 80783592     | 80784416   | 157                          |
| lfrd1              | NM_013562                       | chr12             | 40949068     | 40950168   | 157                          |
| Rmrp               | NR_001460                       | chr4              | 43505577     | 43505969   | 157                          |
| 2310036O22Rik      | NM_026760                       | chr8              | 87550534     | 87551242   | 157                          |
| Rnf168             | NM_027355                       | chr16             | 32277317     | 32278091   | 158                          |
| Mcm7               | NM_008568                       | chr5              | 138612045    | 138613817  | 158                          |

**Supplemental Table 2. Significant ChIP-seq E2F1 promoter peaks  
(+/- 2kb from the TSS)**

| <b>Gene Symbol</b> | <b>Refseq<br/>Transcript ID</b> | <b>Chromosome</b> | <b>Start</b> | <b>End</b> | <b>distance<br/>from TSS</b> |
|--------------------|---------------------------------|-------------------|--------------|------------|------------------------------|
| Tex264             | NM_011573                       | chr9              | 106587627    | 106588349  | 158                          |
| Cuedc2             | NM_001164293                    | chr19             | 46412633     | 46413348   | 159                          |
| Ccdc34             | NM_026613                       | chr2              | 109857779    | 109858485  | 159                          |
| Gins1              | NM_027014                       | chr2              | 150735179    | 150735797  | 159                          |
| Tmem242            | NM_027457                       | chr17             | 5439819      | 5440379    | 160                          |
| Mtcp1              | NM_001294277                    | chrX              | 72661440     | 72662084   | 160                          |
| Grpel2             | NM_021296                       | chr18             | 61885516     | 61886131   | 161                          |
| Rbmxl1             | NM_009033                       | chr8              | 81032227     | 81033103   | 161                          |
| Gpx1               | NM_008160                       | chr9              | 108241123    | 108242020  | 162                          |
| Lonp1              | NM_028782                       | chr17             | 56765870     | 56766456   | 162                          |
| Fnbp4              | NM_018828                       | chr2              | 90585257     | 90586120   | 163                          |
| Tinf2              | NM_145705                       | chr14             | 56300027     | 56300952   | 164                          |
| Mtch1              | NM_019880                       | chr17             | 29484370     | 29484998   | 164                          |
| Tbc1d9             | NM_027758                       | chr8              | 85689041     | 85689787   | 164                          |
| Dnajc9             | NM_134081                       | chr14             | 21207609     | 21208324   | 165                          |
| E130307A14Rik      | NR_038037                       | chr10             | 39451163     | 39452130   | 166                          |
| Ttc33              | NM_026213                       | chr15             | 5135371      | 5136081    | 167                          |
| Rab36              | NM_029781                       | chr10             | 74499840     | 74500163   | 169                          |
| Mthfd2             | NM_008638                       | chr6              | 83267084     | 83267773   | 169                          |
| Foxc1              | NM_008592                       | chr13             | 31898452     | 31898914   | 169                          |
| Vars               | NM_011690                       | chr17             | 35137576     | 35138464   | 169                          |
| Mtbp               | NM_134092                       | chr15             | 55388715     | 55389548   | 170                          |
| Hnrnpm             | NM_029804                       | chr17             | 33821707     | 33822757   | 170                          |
| Snrpd1             | NM_009226                       | chr18             | 10617546     | 10618381   | 171                          |
| Gas1               | NM_008086                       | chr13             | 60278352     | 60279094   | 172                          |
| Zfp213             | NM_001033496                    | chr17             | 23700530     | 23701508   | 173                          |
| Tmem170            | NM_025781                       | chr8              | 114400067    | 114400735  | 173                          |
| 4930483J18Rik      | NR_015603                       | chr15             | 81021043     | 81021868   | 174                          |
| Smc1a              | NM_019710                       | chrX              | 148450674    | 148451615  | 175                          |
| Palm               | NM_001161747                    | chr10             | 79256101     | 79256881   | 175                          |
| Rrp36              | NM_144857                       | chr17             | 46810809     | 46811245   | 176                          |
| Bcl2l1             | NM_009743                       | chr2              | 152656921    | 152657653  | 176                          |
| Rfc1               | NM_011258                       | chr5              | 65726311     | 65727090   | 177                          |
| Rbl2               | NM_011250                       | chr8              | 93593925     | 93594338   | 177                          |
| Kxd1               | NM_029366                       | chr8              | 73046566     | 73047235   | 178                          |
| Bok                | NM_016778                       | chr1              | 95582008     | 95582888   | 178                          |
| Shq1               | NM_181590                       | chr6              | 100620600    | 100621344  | 178                          |
| 4931428F04Rik      | NM_001166394                    | chr8              | 107812848    | 107813648  | 179                          |
| Cops3              | NM_011991                       | chr11             | 59652723     | 59653453   | 180                          |
| Net1               | NM_019671                       | chr13             | 3916952      | 3917616    | 181                          |
| Dsn1               | NM_025853                       | chr2              | 156832270    | 156832988  | 181                          |
| Capza1             | NM_009797                       | chr3              | 104666911    | 104667571  | 181                          |
| Arf2               | NM_007477                       | chr11             | 103828032    | 103828699  | 182                          |
| Nol7               | NM_023554                       | chr13             | 43493572     | 43494280   | 182                          |
| Zfp868             | NM_172754                       | chr8              | 72148850     | 72149676   | 183                          |
| Dhx9               | NM_007842                       | chr1              | 155334151    | 155335060  | 184                          |
| Nkd2               | NM_028186                       | chr13             | 73984579     | 73985207   | 185                          |
| Ttc7               | NM_028639                       | chr17             | 87682010     | 87682811   | 186                          |



**Supplemental Table 2. Significant ChIP-seq E2F1 promoter peaks  
(+/- 2kb from the TSS)**

| <b>Gene Symbol</b> | <b>Refseq<br/>Transcript ID</b> | <b>Chromosome</b> | <b>Start</b> | <b>End</b> | <b>distance<br/>from TSS</b> |
|--------------------|---------------------------------|-------------------|--------------|------------|------------------------------|
| Gm5617             | NM_001004191                    | chr9              | 48303332     | 48303933   | 186                          |
| Tcp1               | NM_013686                       | chr17             | 13108951     | 13109809   | 186                          |
| Kiz                | NM_001033298                    | chr2              | 146681405    | 146682216  | 187                          |
| Med21              | NM_025315                       | chr6              | 146590931    | 146591642  | 187                          |
| Dck                | NM_007832                       | chr5              | 89193692     | 89194759   | 189                          |
| Zfp62              | NM_009562                       | chr11             | 49016823     | 49017558   | 190                          |
| Fen1               | NM_007999                       | chr19             | 10277849     | 10278635   | 190                          |
| Etaa1              | NM_026576                       | chr11             | 17853326     | 17854047   | 191                          |
| Unk                | NM_172569                       | chr11             | 115891459    | 115892180  | 191                          |
| Chek1              | NM_007691                       | chr9              | 36533666     | 36534431   | 194                          |
| Rab33b             | NM_016858                       | chr3              | 51287552     | 51288611   | 195                          |
| Aurkb              | NM_011496                       | chr11             | 68858987     | 68859692   | 196                          |
| Nup43              | NM_145706                       | chr10             | 7387135      | 7387859    | 196                          |
| Ptpn23             | NM_001081043                    | chr9              | 110310205    | 110310828  | 197                          |
| Dxo                | NM_001163770                    | chr17             | 34973798     | 34974524   | 198                          |
| Srsf11             | NM_001093753                    | chr3              | 157694208    | 157694830  | 198                          |
| Elp6               | NM_001081381                    | chr9              | 110207526    | 110208260  | 198                          |
| Acot13             | NM_025790                       | chr13             | 24922737     | 24923580   | 199                          |
| Anapc5             | NM_001042491                    | chr5              | 123270620    | 123271683  | 199                          |
| Dhps               | NM_001039514                    | chr8              | 87595456     | 87596257   | 202                          |
| Rsb1               | NM_172684                       | chr3              | 103717816    | 103718672  | 202                          |
| Dctn4              | NM_026302                       | chr18             | 60685888     | 60686266   | 203                          |
| Rasgef1b           | NM_145839                       | chr5              | 99681478     | 99682006   | 203                          |
| Gid4               | NM_025757                       | chr11             | 60230404     | 60231295   | 204                          |
| Sdf4               | NM_011341                       | chr4              | 155366957    | 155367494  | 204                          |
| Ggnbp2             | NM_153144                       | chr11             | 84683526     | 84684544   | 204                          |
| Emp2               | NM_007929                       | chr16             | 10313516     | 10314196   | 204                          |
| Zc3hav1            | NM_172467                       | chr6              | 38248770     | 38249337   | 205                          |
| Ints3              | NM_145540                       | chr3              | 90236978     | 90237726   | 205                          |
| Rrm1               | NM_009103                       | chr7              | 109589971    | 109590855  | 205                          |
| Wdyhv1             | NM_029734                       | chr15             | 57972917     | 57973478   | 208                          |
| Gapdh              | NM_008084                       | chr6              | 125115187    | 125115978  | 208                          |
| Ola1               | NM_025942                       | chr2              | 73052030     | 73052560   | 208                          |
| Xrn2               | NM_011917                       | chr2              | 146838614    | 146839392  | 208                          |
| 3110021A11Rik      | NR_030776                       | chr6              | 119798171    | 119798667  | 209                          |
| Cetn3              | NM_007684                       | chr13             | 81922088     | 81922911   | 210                          |
| Zfat               | NM_198644                       | chr15             | 68089465     | 68090948   | 211                          |
| Srsf1              | NM_001078167                    | chr11             | 87860530     | 87861640   | 211                          |
| Sp2                | NM_030220                       | chr11             | 96838344     | 96839235   | 212                          |
| Dusp1              | NM_013642                       | chr17             | 26644373     | 26646036   | 212                          |
| Cnot7              | NM_001271543                    | chr8              | 41596514     | 41597276   | 212                          |
| Nsmce2             | NM_026746                       | chr15             | 59205614     | 59206316   | 213                          |
| Kars               | NM_001130868                    | chr8              | 114534845    | 114535234  | 214                          |
| Plekhj1            | NM_023900                       | chr10             | 80260384     | 80261927   | 215                          |
| Mrm1               | NM_145433                       | chr11             | 84632388     | 84633215   | 215                          |
| Slc3a2             | NM_001161413                    | chr19             | 8797308      | 8797976    | 216                          |
| Pcnt               | NM_008787                       | chr10             | 75904868     | 75906011   | 217                          |
| Sppl2a             | NM_023220                       | chr2              | 126758521    | 126758984  | 218                          |

**Supplemental Table 2. Significant ChIP-seq E2F1 promoter peaks  
(+/- 2kb from the TSS)**

| <b>Gene Symbol</b> | <b>Refseq<br/>Transcript ID</b> | <b>Chromosome</b> | <b>Start</b> | <b>End</b> | <b>distance<br/>from TSS</b> |
|--------------------|---------------------------------|-------------------|--------------|------------|------------------------------|
| Raver1             | NM_027911                       | chr9              | 20895908     | 20896519   | 218                          |
| Atp5j              | NM_016755                       | chr16             | 84835366     | 84835834   | 218                          |
| Fam227a            | NM_029407                       | chr15             | 79488879     | 79489454   | 219                          |
| Msra               | NM_001253715                    | chr14             | 65058983     | 65060298   | 222                          |
| Ppp6r3             | NM_001164159                    | chr19             | 3575252      | 3575798    | 223                          |
| Pole2              | NM_011133                       | chr12             | 70328535     | 70329370   | 224                          |
| Ndufaf4            | NM_026742                       | chr4              | 24825248     | 24825658   | 224                          |
| Casp3              | NM_009810                       | chr8              | 47702250     | 47703487   | 225                          |
| Zdhhc6             | NM_025883                       | chr19             | 55389924     | 55390668   | 225                          |
| Znhit2             | NM_013859                       | chr19             | 6061080      | 6061783    | 226                          |
| Dlx1               | NM_010053                       | chr2              | 71367407     | 71368046   | 226                          |
| Amotl2             | NM_019764                       | chr9              | 102619574    | 102621147  | 228                          |
| Kif2c              | NM_134471                       | chr4              | 116854658    | 116855342  | 228                          |
| Kansl2             | NM_001289439                    | chr15             | 98363919     | 98365021   | 229                          |
| Pcolce2            | NM_029620                       | chr9              | 95537994     | 95538557   | 230                          |
| Pmf1               | NM_025928                       | chr3              | 88213590     | 88214424   | 230                          |
| Rab27b             | NM_030554                       | chr18             | 70212563     | 70213019   | 231                          |
| Poll               | NM_020032                       | chr19             | 45634541     | 45635060   | 232                          |
| Ccdc138            | NM_001162956                    | chr10             | 57960475     | 57961362   | 235                          |
| Siah2              | NM_009174                       | chr3              | 58495876     | 58496273   | 235                          |
| Ptbp1              | NM_008956                       | chr10             | 79316933     | 79317889   | 235                          |
| Gm6793             | NR_033513                       | chr2              | 75496805     | 75498357   | 235                          |
| Cbx1               | NM_007622                       | chr11             | 96650249     | 96651120   | 236                          |
| Arhgap31           | NM_020260                       | chr16             | 38712708     | 38713115   | 236                          |
| Pycl               | NM_025412                       | chr15             | 75751261     | 75752242   | 238                          |
| C330006A16Rik      | NM_001256521                    | chr2              | 25995391     | 25996184   | 238                          |
| Cep83os            | NR_015524                       | chr10             | 94150863     | 94151374   | 239                          |
| Etf1               | NM_144866                       | chr18             | 35090911     | 35091924   | 239                          |
| Taok2              | NM_001163774                    | chr7              | 134027796    | 134028687  | 239                          |
| Rbm14-rbm4         | NM_001290127                    | chr19             | 4810858      | 4811930    | 239                          |
| Ppapdc1b           | NM_001293703                    | chr8              | 26830382     | 26831134   | 239                          |
| Fuca2              | NM_025799                       | chr10             | 13220732     | 13221413   | 240                          |
| 2610015P09Rik      | NM_027801                       | chr16             | 43889884     | 43890626   | 241                          |
| Mrpl23             | NM_011288                       | chr7              | 149718931    | 149719593  | 241                          |
| Wbp1               | NM_016757                       | chr6              | 83070919     | 83071505   | 242                          |
| Eri1               | NM_026067                       | chr8              | 36557863     | 36558824   | 243                          |
| Snx1               | NM_019727                       | chr9              | 65972087     | 65972809   | 244                          |
| Kdelr3             | NM_134090                       | chr15             | 79346873     | 79347290   | 245                          |
| Snn                | NM_009223                       | chr16             | 11066054     | 11067215   | 245                          |
| Gm16576            | NR_045069                       | chr15             | 79572929     | 79573817   | 246                          |
| Naca               | NM_001282976                    | chr10             | 127472076    | 127473219  | 247                          |
| 1110038F14Rik      | NM_054099                       | chr15             | 76778750     | 76779691   | 248                          |
| Rpusd2             | NM_173450                       | chr2              | 118860386    | 118861159  | 248                          |
| Sumo3              | NM_019929                       | chr10             | 77068930     | 77069527   | 251                          |
| Helb               | NM_080446                       | chr10             | 119549345    | 119550194  | 251                          |
| Prr24              | NM_001136270                    | chr7              | 16858516     | 16859060   | 252                          |
| Tom11              | NM_028011                       | chr11             | 90548354     | 90548969   | 253                          |
| Cdipt              | NM_026638                       | chr7              | 134119441    | 134119923  | 255                          |

**Supplemental Table 2. Significant ChIP-seq E2F1 promoter peaks  
(+/- 2kb from the TSS)**

| <b>Gene Symbol</b> | <b>Refseq<br/>Transcript ID</b> | <b>Chromosome</b> | <b>Start</b> | <b>End</b> | <b>distance<br/>from TSS</b> |
|--------------------|---------------------------------|-------------------|--------------|------------|------------------------------|
| Tln1               | NM_011602                       | chr4              | 43574885     | 43575512   | 256                          |
| Triobp             | NM_001039156                    | chr15             | 78778018     | 78778802   | 257                          |
| Nudc               | NM_010948                       | chr4              | 133101249    | 133102119  | 257                          |
| Oxct1              | NM_024188                       | chr15             | 3976361      | 3977009    | 258                          |
| Mir7238            | NR_106097                       | chr8              | 11635079     | 11635869   | 261                          |
| Nudcd3             | NM_173748                       | chr11             | 6099896      | 6100483    | 264                          |
| Ensa               | NM_019561                       | chr3              | 95428688     | 95429641   | 264                          |
| Stk3               | NM_019635                       | chr15             | 35084886     | 35085706   | 264                          |
| Sfmbt1             | NM_001166532                    | chr14             | 31528590     | 31529540   | 265                          |
| Mtx1               | NM_001161824                    | chr3              | 89017617     | 89018365   | 265                          |
| Nhlrc2             | NM_025811                       | chr19             | 56622280     | 56623752   | 266                          |
| Fancb              | NM_001146081                    | chrX              | 161418438    | 161419143  | 268                          |
| Fn1                | NM_001276411                    | chr1              | 71699159     | 71699919   | 268                          |
| Gsk3a              | NM_001031667                    | chr7              | 26022357     | 26022841   | 270                          |
| E2f3               | NM_010093                       | chr13             | 30076821     | 30078497   | 272                          |
| Tsg101             | NM_021884                       | chr7              | 54174729     | 54175323   | 273                          |
| Nol12              | NM_133800                       | chr15             | 78765294     | 78765978   | 274                          |
| Exosc1             | NM_025644                       | chr19             | 42007346     | 42007711   | 275                          |
| Prnd               | NM_001278520                    | chr2              | 131776765    | 131777329  | 275                          |
| Stxbp3a            | NM_011504                       | chr3              | 108642834    | 108643454  | 275                          |
| Eif4b              | NM_145625                       | chr15             | 101903951    | 101905006  | 276                          |
| Cpsf1              | NM_001164173                    | chr15             | 76437304     | 76438183   | 277                          |
| Higd1a             | NM_019814                       | chr9              | 121766584    | 121767090  | 280                          |
| Zfp367             | NM_175494                       | chr13             | 64253447     | 64255003   | 281                          |
| Orc6               | NM_019716                       | chr8              | 87823305     | 87824320   | 283                          |
| Tm9sf1             | NM_028780                       | chr14             | 56261780     | 56262935   | 285                          |
| Rhof               | NM_175092                       | chr5              | 123581985    | 123582720  | 285                          |
| G3bp1              | NM_013716                       | chr11             | 55283181     | 55283899   | 287                          |
| Rcc1               | NM_001197082                    | chr4              | 131900964    | 131901781  | 292                          |
| Fam178a            | NM_001081225                    | chr19             | 45005425     | 45006375   | 292                          |
| Cops5              | NM_013715                       | chr1              | 10027588     | 10028303   | 294                          |
| Gtf2ird2           | NM_053266                       | chr5              | 134659731    | 134660670  | 294                          |
| Ywhaz              | NM_001253805                    | chr15             | 36723673     | 36724321   | 295                          |
| Ccdc91             | NM_025911                       | chr6              | 147424336    | 147425040  | 296                          |
| Rps15a             | NM_170669                       | chr7              | 125259143    | 125259584  | 297                          |
| Tgfbr3             | NM_011578                       | chr5              | 107717865    | 107718764  | 299                          |
| Cep78              | NM_198019                       | chr19             | 16058908     | 16059442   | 303                          |
| Tnrc6c             | NM_198022                       | chr11             | 117515662    | 117516149  | 304                          |
| Pnn                | NM_008891                       | chr12             | 60167762     | 60168655   | 304                          |
| Fbxo7              | NM_153195                       | chr10             | 85484447     | 85485507   | 304                          |
| Ubb                | NM_011664                       | chr11             | 62364911     | 62365708   | 305                          |
| Wdr4               | NM_021322                       | chr17             | 31648854     | 31649396   | 306                          |
| Gm2518             | NR_015538                       | chr19             | 8848849      | 8849711    | 306                          |
| Mtss1l             | NM_198625                       | chr8              | 113245512    | 113245866  | 306                          |
| Tspan4             | NM_053082                       | chr7              | 148661143    | 148661739  | 307                          |
| Rplp0              | NM_007475                       | chr5              | 116009526    | 116010043  | 310                          |
| Msl3               | NM_010832                       | chrX              | 165111201    | 165111844  | 311                          |
| Cep72              | NM_028959                       | chr13             | 74198939     | 74199903   | 311                          |

**Supplemental Table 2. Significant ChIP-seq E2F1 promoter peaks  
(+/- 2kb from the TSS)**

| <b>Gene Symbol</b> | <b>Refseq<br/>Transcript ID</b> | <b>Chromosome</b> | <b>Start</b> | <b>End</b> | <b>distance<br/>from TSS</b> |
|--------------------|---------------------------------|-------------------|--------------|------------|------------------------------|
| C2cd2              | NM_174847                       | chr16             | 98143531     | 98144330   | 312                          |
| Pnrc1              | NM_001033225                    | chr4              | 33335202     | 33335695   | 313                          |
| Nek2               | NM_010892                       | chr1              | 193645275    | 193646055  | 314                          |
| Mcm9               | NM_027830                       | chr10             | 53349648     | 53350203   | 319                          |
| Slc25a22           | NM_026646                       | chr7              | 148623181    | 148623721  | 321                          |
| Timeless           | NM_001136082                    | chr10             | 127668929    | 127669952  | 323                          |
| Exosc8             | NM_001163570                    | chr3              | 54538612     | 54539310   | 324                          |
| Senp1              | NM_144851                       | chr15             | 97923164     | 97924184   | 325                          |
| Klf11              | NM_178357                       | chr12             | 25336227     | 25336894   | 326                          |
| Matn2              | NM_016762                       | chr15             | 34236154     | 34237369   | 327                          |
| Ppp1r15b           | NM_133819                       | chr1              | 135027697    | 135028442  | 328                          |
| Dus3l              | NM_144858                       | chr17             | 56904067     | 56904936   | 329                          |
| Zfp53              | NM_013843                       | chr17             | 21625999     | 21626564   | 331                          |
| Ap2a2              | NM_007459                       | chr7              | 148748152    | 148748665  | 331                          |
| Gpank1             | NM_001128597                    | chr17             | 35258337     | 35259206   | 332                          |
| Dlgap5             | NM_144553                       | chr14             | 48037368     | 48038130   | 332                          |
| Ahctf1             | NM_026375                       | chr1              | 181733437    | 181734185  | 334                          |
| Clip2              | NM_009990                       | chr5              | 135027528    | 135028407  | 336                          |
| Ctps               | NM_016748                       | chr4              | 120242154    | 120242934  | 336                          |
| Ctdsp1             | NM_153088                       | chr1              | 74437947     | 74439094   | 339                          |
| Akap8              | NM_019774                       | chr17             | 32457325     | 32458187   | 341                          |
| Pcbp2              | NM_011042                       | chr15             | 102301163    | 102301646  | 343                          |
| 2810403A07Rik      | NM_028814                       | chr3              | 88489385     | 88490733   | 344                          |
| Alkbh5             | NM_172943                       | chr11             | 60351379     | 60351679   | 345                          |
| Gmfb               | NM_022023                       | chr14             | 47441280     | 47441861   | 346                          |
| Klf2               | NM_008452                       | chr8              | 74842939     | 74843675   | 347                          |
| Arsb               | NM_009712                       | chr13             | 94541771     | 94542192   | 349                          |
| Smarca4            | NM_001174079                    | chr9              | 21420654     | 21421269   | 350                          |
| Rccd1              | NM_173445                       | chr7              | 87468594     | 87469378   | 353                          |
| Dzip1l             | NM_028258                       | chr9              | 99530088     | 99530645   | 354                          |
| Rell1              | NM_145923                       | chr5              | 64359280     | 64360262   | 364                          |
| Tbc1d31            | NM_001081396                    | chr15             | 57743509     | 57744733   | 368                          |
| Phlda3             | NM_013750                       | chr1              | 137662738    | 137663323  | 370                          |
| Ptprm              | NM_008984                       | chr17             | 67703055     | 67703801   | 370                          |
| Carhsp1            | NM_025821                       | chr16             | 8671471      | 8672277    | 371                          |
| Gtf3c5             | NM_001290484                    | chr2              | 28438100     | 28438752   | 372                          |
| Gmnn               | NM_020567                       | chr13             | 24852969     | 24853896   | 373                          |
| Gm17762            | NR_028378                       | chr2              | 17948880     | 17949616   | 373                          |
| Brd2               | NR_037970                       | chr17             | 34256007     | 34256931   | 375                          |
| Higd2a             | NM_025933                       | chr13             | 54691704     | 54692234   | 378                          |
| Gm3230             | NR_033642                       | chr2              | 19578786     | 19579494   | 383                          |
| Mier1              | NM_001286222                    | chr4              | 102787139    | 102787617  | 384                          |
| Tspan4             | NM_001252588                    | chr7              | 148662422    | 148662908  | 387                          |
| HnrnpI             | NM_177301                       | chr7              | 29595903     | 29596688   | 388                          |
| Ahcy               | NM_016661                       | chr2              | 154899387    | 154900300  | 389                          |
| Bcl7b              | NM_009745                       | chr5              | 135644316    | 135644953  | 394                          |
| Tpm2               | NM_001277875                    | chr4              | 43535488     | 43536570   | 396                          |
| Tuba1b             | NM_011654                       | chr15             | 98763948     | 98764894   | 399                          |

**Supplemental Table 2. Significant ChIP-seq E2F1 promoter peaks  
(+/- 2kb from the TSS)**

| <b>Gene Symbol</b> | <b>Refseq<br/>Transcript ID</b> | <b>Chromosome</b> | <b>Start</b> | <b>End</b> | <b>distance<br/>from TSS</b> |
|--------------------|---------------------------------|-------------------|--------------|------------|------------------------------|
| Shmt2              | NM_001252316                    | chr10             | 126958574    | 126959616  | 404                          |
| Ddrk1              | NM_029832                       | chr2              | 130489688    | 130490251  | 411                          |
| Ipp                | NM_008389                       | chr4              | 116179785    | 116181342  | 411                          |
| Hook3              | NM_207659                       | chr8              | 27228947     | 27229620   | 412                          |
| 0610037L13Rik      | NM_028754                       | chr4              | 107562652    | 107563182  | 414                          |
| Uhrf1              | NM_001111079                    | chr17             | 56442385     | 56443975   | 421                          |
| Anapc15            | NM_001291348                    | chr7              | 109044748    | 109045787  | 424                          |
| Eif1               | NM_011508                       | chr11             | 100181473    | 100181998  | 427                          |
| Syne2              | NM_001005510                    | chr12             | 76919246     | 76920220   | 429                          |
| Lrrc14             | NM_145471                       | chr15             | 76541282     | 76541915   | 430                          |
| Snrnp35            | NM_029532                       | chr5              | 124933222    | 124933970  | 433                          |
| Nacad              | NM_001081652                    | chr11             | 6505383      | 6505861    | 434                          |
| Thada              | NM_183021                       | chr17             | 84864776     | 84865435   | 442                          |
| Tacc3              | NM_001040435                    | chr5              | 34000984     | 34001496   | 445                          |
| Fam134a            | NM_170755                       | chr1              | 75139531     | 75140093   | 453                          |
| Cand1              | NM_027994                       | chr10             | 118675885    | 118677425  | 455                          |
| A930005H10Rik      | NR_027894                       | chr3              | 115590038    | 115590989  | 463                          |
| Tax1bp3            | NM_029564                       | chr11             | 72990741     | 72991356   | 465                          |
| Cbfb               | NM_001161458                    | chr8              | 107694721    | 107695357  | 466                          |
| Zfp689             | NM_175163                       | chr7              | 134591905    | 134592495  | 471                          |
| Mb21d2             | NM_177718                       | chr16             | 28929082     | 28929540   | 472                          |
| Tagln2             | NM_178598                       | chr1              | 174430636    | 174431072  | 478                          |
| Pcif1              | NM_146129                       | chr2              | 164704771    | 164705923  | 480                          |
| Xiap               | NM_009688                       | chrX              | 39421112     | 39421872   | 480                          |
| 4932412D23Rik      | NR_040521                       | chr16             | 42874644     | 42875781   | 487                          |
| Zfp787             | NM_001013012                    | chr7              | 6106906      | 6107260    | 489                          |
| Actn1              | NM_134156                       | chr12             | 81360629     | 81361105   | 490                          |
| Rhbdl3             | NM_139228                       | chr11             | 80114455     | 80115380   | 505                          |
| Zmym4              | NM_001114399                    | chr4              | 126644384    | 126644939  | 505                          |
| Stub1              | NM_019719                       | chr17             | 25969412     | 25970181   | 509                          |
| Sin3a              | NM_001110350                    | chr9              | 56924355     | 56925037   | 514                          |
| Tapt1              | NM_173764                       | chr5              | 44617114     | 44617524   | 525                          |
| Mir6976            | NR_105942                       | chr17             | 46690139     | 46690478   | 529                          |
| Casc5              | NM_029617                       | chr2              | 118873083    | 118873685  | 530                          |
| Smrbc1             | NM_001161853                    | chr10             | 75383572     | 75384083   | 531                          |
| Get4               | NM_026269                       | chr5              | 139728482    | 139729137  | 533                          |
| Sumo2              | NM_133354                       | chr11             | 115396676    | 115397339  | 536                          |
| Ncapd3             | NM_178113                       | chr9              | 26837787     | 26838802   | 536                          |
| Mbd3               | NM_013595                       | chr10             | 79861264     | 79862105   | 539                          |
| Rtn4               | NM_194051                       | chr11             | 29594070     | 29594564   | 544                          |
| Maf1               | NM_001164608                    | chr15             | 76181829     | 76182709   | 546                          |
| 4930539J05Rik      | NR_030689                       | chr3              | 135100785    | 135101379  | 546                          |
| Prdm11             | NM_001177536                    | chr2              | 92885547     | 92885958   | 548                          |
| Dennd4a            | NM_001162917                    | chr9              | 64659063     | 64659672   | 551                          |
| Prkar2a            | NM_008924                       | chr9              | 108594725    | 108595322  | 551                          |
| Nrf1               | NM_001164226                    | chr6              | 29998264     | 29998821   | 556                          |
| Tpm4               | NM_001001491                    | chr8              | 74659255     | 74660242   | 559                          |
| Zcchc8             | NM_027494                       | chr5              | 124169960    | 124171014  | 565                          |

**Supplemental Table 2. Significant ChIP-seq E2F1 promoter peaks  
(+/- 2kb from the TSS)**

| <b>Gene Symbol</b> | <b>Refseq<br/>Transcript ID</b> | <b>Chromosome</b> | <b>Start</b> | <b>End</b> | <b>distance<br/>from TSS</b> |
|--------------------|---------------------------------|-------------------|--------------|------------|------------------------------|
| 1110007C09Rik      | NM_026738                       | chr13             | 49310494     | 49311161   | 567                          |
| Nr1d2              | NM_011584                       | chr14             | 19070108     | 19071982   | 574                          |
| Nasp               | NM_001081475                    | chr4              | 116299172    | 116299880  | 575                          |
| Rac1               | NM_009007                       | chr5              | 144287977    | 144288588  | 578                          |
| Ubr2               | NM_001177374                    | chr17             | 47146495     | 47147306   | 580                          |
| Tor1b              | NM_133673                       | chr2              | 30808873     | 30809338   | 586                          |
| Agpat1             | NM_001163379                    | chr17             | 34743173     | 34743612   | 588                          |
| 1810013L24Rik      | NM_001081400                    | chr16             | 8830558      | 8831022    | 598                          |
| Laptm4a            | NM_008640                       | chr12             | 8928325      | 8929101    | 601                          |
| Rbmx               | NR_029425                       | chrX              | 54645231     | 54645988   | 603                          |
| Srsf4              | NM_020587                       | chr4              | 131429914    | 131430401  | 605                          |
| Lancl2             | NM_133737                       | chr6              | 57652592     | 57653533   | 615                          |
| Map3k11            | NM_022012                       | chr19             | 5689452      | 5690061    | 627                          |
| Stk33              | NM_054103                       | chr7              | 116581786    | 116582091  | 628                          |
| Pvr                | NM_027514                       | chr7              | 20505608     | 20506108   | 633                          |
| Rpl36al            | NM_025589                       | chr12             | 70284134     | 70284700   | 636                          |
| Vps26a             | NM_001113355                    | chr10             | 61948469     | 61948930   | 646                          |
| Plrg1              | NM_016784                       | chr3              | 82859855     | 82860375   | 656                          |
| Mthfsd             | NM_172761                       | chr8              | 123631375    | 123631858  | 662                          |
| Tcf7l1             | NM_001079822                    | chr6              | 72738001     | 72738741   | 667                          |
| Got2               | NM_010325                       | chr8              | 98411229     | 98411955   | 672                          |
| Erp29              | NM_026129                       | chr5              | 121901529    | 121902072  | 682                          |
| Brpf3              | NM_001081315                    | chr17             | 28938436     | 28939078   | 687                          |
| B3gnt9             | NM_178879                       | chr8              | 107778030    | 107778699  | 688                          |
| Tyms               | NM_021288                       | chr5              | 30399100     | 30399829   | 700                          |
| Pptc7              | NM_177242                       | chr5              | 122734818    | 122735398  | 702                          |
| Phf19              | NM_028716                       | chr2              | 34768404     | 34769161   | 713                          |
| Cdh6               | NM_007666                       | chr15             | 13102061     | 13103298   | 714                          |
| Unc5b              | NM_029770                       | chr10             | 60293247     | 60293980   | 715                          |
| Hist1h2ag          | NM_178186                       | chr13             | 22133833     | 22134370   | 716                          |
| Scaf11             | NM_028148                       | chr15             | 96290276     | 96290833   | 719                          |
| Stmn1              | NM_019641                       | chr4              | 134024618    | 134025296  | 723                          |
| Mthfd1l            | NM_001170785                    | chr10             | 6372326      | 6373155    | 725                          |
| Zrsr2              | NM_009453                       | chrX              | 160395593    | 160396143  | 729                          |
| Ndrp1              | NM_008681                       | chr15             | 66800047     | 66800893   | 732                          |
| Sema4c             | NM_001126047                    | chr1              | 36614065     | 36614915   | 735                          |
| Smarce1            | NM_020618                       | chr11             | 99091234     | 99091956   | 735                          |
| Gab1               | NM_021356                       | chr8              | 83403150     | 83404128   | 738                          |
| Spsb2              | NM_013539                       | chr6              | 124759284    | 124760110  | 739                          |
| Slc7a1             | NM_007513                       | chr5              | 149210438    | 149211033  | 744                          |
| Hnrnpab            | NM_010448                       | chr11             | 51419326     | 51419939   | 750                          |
| Plcg1              | NM_021280                       | chr2              | 160557507    | 160558110  | 764                          |
| Snai1              | NM_011427                       | chr2              | 167364126    | 167364880  | 777                          |
| Gt(ROSA)26Sor      | NR_027010                       | chr6              | 113025929    | 113026991  | 777                          |
| Icam4              | NM_023892                       | chr9              | 20834351     | 20834841   | 780                          |
| Thap4              | NM_025920                       | chr1              | 95650373     | 95650889   | 783                          |
| Gtf2i              | NM_001080748                    | chr5              | 134789319    | 134790359  | 790                          |
| Ccdc170            | NM_001195672                    | chr10             | 5835586      | 5836167    | 792                          |

**Supplemental Table 2. Significant ChIP-seq E2F1 promoter peaks (+/- 2kb from the TSS)**

| <b>Gene Symbol</b> | <b>Refseq Transcript ID</b> | <b>Chromosome</b> | <b>Start</b> | <b>End</b> | <b>distance from TSS</b> |
|--------------------|-----------------------------|-------------------|--------------|------------|--------------------------|
| Hist1h2bn          | NM_178201                   | chr13             | 21846597     | 21847000   | 808                      |
| Dhx15              | NM_007839                   | chr5              | 52580634     | 52581316   | 809                      |
| Chmp2b             | NM_026879                   | chr16             | 65561932     | 65562308   | 821                      |
| Gsr                | NM_010344                   | chr8              | 34764230     | 34764835   | 824                      |
| Nmt2               | NM_001290370                | chr2              | 3202007      | 3202608    | 825                      |
| Wdr82              | NM_029896                   | chr9              | 106073674    | 106074494  | 825                      |
| Tat                | NM_146214                   | chr8              | 112514912    | 112515410  | 826                      |
| Pfn1               | NM_011072                   | chr11             | 70467051     | 70467591   | 830                      |
| Dleu2              | NR_028264                   | chr14             | 62299957     | 62300801   | 830                      |
| Pacs2              | NM_001081170                | chr12             | 114253288    | 114253868  | 860                      |
| Kitl               | NM_013598                   | chr10             | 99479034     | 99479601   | 861                      |
| Fus                | NM_139149                   | chr7              | 135111672    | 135112068  | 878                      |
| Zfp422             | NM_026057                   | chr6              | 116577908    | 116578315  | 883                      |
| Actb               | NM_007393                   | chr5              | 143667121    | 143667889  | 897                      |
| Copg2              | NM_017478                   | chr6              | 30845513     | 30846273   | 900                      |
| Eif4a1             | NM_144958                   | chr11             | 69484628     | 69485375   | 923                      |
| Zbtb7a             | NM_010731                   | chr10             | 80599325     | 80600553   | 924                      |
| Mcm9               | NM_027830                   | chr10             | 53349065     | 53349573   | 925                      |
| Cab39l             | NM_026908                   | chr14             | 60060485     | 60061005   | 928                      |
| Ska2               | NM_025377                   | chr11             | 86923370     | 86924036   | 941                      |
| Rrbp1              | NM_024281                   | chr2              | 143835668    | 143836444  | 942                      |
| Hist1h1d           | NM_145713                   | chr13             | 23647507     | 23648208   | 958                      |
| Lemd3              | NM_001081193                | chr10             | 120415052    | 120415794  | 962                      |
| Tmsb4x             | NM_021278                   | chrX              | 163645906    | 163646437  | 978                      |
| Ttc7               | NM_028639                   | chr17             | 87682975     | 87683431   | 978                      |
| Pkd1               | NM_013630                   | chr17             | 24687664     | 24688105   | 991                      |
| Pard3              | NM_033620                   | chr8              | 129588650    | 129589247  | 994                      |
| Tubb5              | NM_011655                   | chr17             | 35973866     | 35974615   | 1005                     |
| Ddx26b             | NM_172779                   | chrX              | 53708734     | 53709310   | 1007                     |
| Set                | NM_001204875                | chr2              | 29922651     | 29923388   | 1027                     |
| Sil1               | NM_030749                   | chr18             | 35657317     | 35657779   | 1030                     |
| Thoc7              | NM_001285780                | chr14             | 14792626     | 14792955   | 1036                     |
| C030034I22Rik      | NR_026848                   | chr17             | 69766493     | 69767162   | 1042                     |
| Sfpq               | NR_045010                   | chr4              | 126699356    | 126699822  | 1045                     |
| 5430416N02Rik      | NR_034038                   | chr5              | 100857169    | 100857837  | 1050                     |
| Nipbl              | NM_027707                   | chr15             | 8393210      | 8393610    | 1052                     |
| Scrt1              | NM_001081411                | chr3              | 41544959     | 41545806   | 1053                     |
| Dnmt1              | NM_001199433                | chr9              | 20755744     | 20756273   | 1058                     |
| Jund               | NM_010592                   | chr8              | 73222241     | 73223193   | 1080                     |
| Tubb6              | NM_026473                   | chr18             | 67551153     | 67551793   | 1089                     |
| Crabp1             | NM_013496                   | chr9              | 54613302     | 54614061   | 1128                     |
| Ltbp4              | NM_175641                   | chr7              | 28121196     | 28121808   | 1128                     |
| Lmnb1              | NM_010721                   | chr18             | 56868383     | 56868812   | 1132                     |
| Hist1h1c           | NM_015786                   | chr13             | 23831463     | 23832170   | 1142                     |
| Trp53              | NM_001127233                | chr11             | 69394412     | 69395598   | 1145                     |
| Spred2             | NM_033523                   | chr11             | 19825071     | 19826118   | 1151                     |
| Sin3a              | NM_001110351                | chr9              | 56920724     | 56921278   | 1155                     |
| Socs3              | NM_007707                   | chr11             | 117829300    | 117829743  | 1158                     |

**Supplemental Table 2. Significant ChIP-seq E2F1 promoter peaks  
(+/- 2kb from the TSS)**

| <b>Gene Symbol</b> | <b>Refseq<br/>Transcript ID</b> | <b>Chromosome</b> | <b>Start</b> | <b>End</b> | <b>distance<br/>from TSS</b> |
|--------------------|---------------------------------|-------------------|--------------|------------|------------------------------|
| 9130011E15Rik      | NM_198296                       | chr19             | 46071506     | 46072110   | 1169                         |
| Dlk2               | NM_001286013                    | chr17             | 46435843     | 46436280   | 1186                         |
| Bcar1              | NM_001198839                    | chr8              | 114254554    | 114255124  | 1196                         |
| Sema5a             | NM_009154                       | chr15             | 32175598     | 32176031   | 1248                         |
| Ftx                | NR_028381                       | chrX              | 100817673    | 100817989  | 1261                         |
| Senp5              | NM_177103                       | chr16             | 32001788     | 32002395   | 1281                         |
| Eml5               | NM_001081191                    | chr12             | 100138205    | 100138610  | 1286                         |
| Ube2g1             | NM_025985                       | chr11             | 72421786     | 72422320   | 1291                         |
| Hnrnpu             | NM_016805                       | chr1              | 180266403    | 180266801  | 1312                         |
| Shisa5             | NM_026381                       | chr9              | 108958517    | 108958883  | 1321                         |
| Clip2              | NM_009990                       | chr5              | 135026678    | 135027260  | 1334                         |
| Angptl6            | NM_145154                       | chr9              | 20682311     | 20683257   | 1369                         |
| Gadd45g            | NM_011817                       | chr13             | 51942955     | 51943870   | 1370                         |
| 0610009L18Rik      | NR_038126                       | chr11             | 120211023    | 120211724  | 1383                         |
| Cdkn1a             | NM_007669                       | chr17             | 29231157     | 29233061   | 1393                         |
| Sdc1               | NM_011519                       | chr12             | 8779385      | 8779809    | 1396                         |
| Gm17762            | NR_028378                       | chr2              | 17950019     | 17950584   | 1427                         |
| Lrp8               | NM_001080926                    | chr4              | 107475929    | 107476668  | 1436                         |
| Hnrnpa2b1          | NM_016806                       | chr6              | 51418124     | 51418757   | 1452                         |
| Ckap4              | NM_175451                       | chr10             | 83994760     | 83995405   | 1550                         |
| Nphp3              | NM_028721                       | chr9              | 103906189    | 103906700  | 1572                         |
| Etaa1              | NM_026576                       | chr11             | 17852022     | 17852428   | 1652                         |
| Galk1              | NM_016905                       | chr11             | 115872104    | 115872619  | 1671                         |
| Rasl10a            | NM_145216                       | chr11             | 4959603      | 4960039    | 1691                         |
| Wdr54              | NM_023790                       | chr6              | 83104486     | 83104869   | 1695                         |
| Hsd3b3             | NM_001161745                    | chr3              | 98564433     | 98564827   | 1702                         |
| Frdm6              | NM_028127                       | chr12             | 71927924     | 71928520   | 1722                         |
| Mss51              | NM_029104                       | chr14             | 21314066     | 21314697   | 1741                         |
| Ptma               | NM_008972                       | chr1              | 88424132     | 88425990   | 1751                         |
| Myc                | NM_001177353                    | chr15             | 61818333     | 61818982   | 1763                         |
| Sin3a              | NM_001110351                    | chr9              | 56921415     | 56921820   | 1772                         |
| Fam64a             | NM_144526                       | chr11             | 71857703     | 71858050   | 1874                         |
| Pou3f2             | NM_008899                       | chr4              | 22413304     | 22413965   | 1878                         |
| Ajuba              | NM_010590                       | chr14             | 55194314     | 55194891   | 1895                         |
| Gnai2              | NM_008138                       | chr9              | 107535449    | 107536089  | 1903                         |
| Ncam1              | NM_001113204                    | chr9              | 49604902     | 49605551   | 1947                         |
| Sowahc             | NM_172939                       | chr10             | 58686305     | 58686933   | 1950                         |
| Junb               | NM_008416                       | chr8              | 87499971     | 87501413   | 1954                         |
| 2810002D19Rik      | NR_027831                       | chr2              | 94248522     | 94249139   | 1968                         |
| Ing1               | NM_011919                       | chr8              | 11557747     | 11558377   | 1997                         |



**Supplemental Table 3. Significant ChIP-seq E2F3A promoter peaks  
(+/- 2kb from the TSS)**

| <b>Gene Symbol</b> | <b>Refseq<br/>Transcript ID</b> | <b>Chromosome</b> | <b>Start</b> | <b>End</b> | <b>distance<br/>from TSS</b> |
|--------------------|---------------------------------|-------------------|--------------|------------|------------------------------|
| Necab3             | NM_021546                       | chr2              | 154386383    | 154386737  | -1972                        |
| Plekha2            | NM_031257                       | chr8              | 26214051     | 26214424   | -1956                        |
| Ftl1               | NM_010240                       | chr7              | 52717009     | 52717381   | -1940                        |
| Tmem194            | NM_001113211                    | chr10             | 127112086    | 127112454  | -1850                        |
| Ywhaz              | NM_001253807                    | chr15             | 36722149     | 36722640   | -1709                        |
| Tomm22             | NM_172609                       | chr15             | 79499456     | 79499742   | -1698                        |
| Fis1               | NM_001163243                    | chr5              | 137427320    | 137427583  | -1693                        |
| Grm8               | NM_008174                       | chr6              | 28085873     | 28086225   | -1681                        |
| Olf16b             | NM_146550                       | chr10             | 129230095    | 129230459  | -1635                        |
| Kif16b             | NM_001081133                    | chr2              | 142728654    | 142728955  | -1606                        |
| Mmp8               | NM_008611                       | chr9              | 7556718      | 7556997    | -1571                        |
| Hcfc1              | NM_008224                       | chrX              | 71213016     | 71213510   | -1568                        |
| Scd2               | NM_009128                       | chr19             | 44366433     | 44366790   | -1554                        |
| Clmp               | NM_133733                       | chr9              | 40492372     | 40492713   | -1504                        |
| Nudt16             | NM_029385                       | chr9              | 105035507    | 105035738  | -1489                        |
| ErbB3              | NM_010153                       | chr10             | 128027853    | 128028208  | -1475                        |
| Ctdsp1             | NM_153088                       | chr1              | 74436664     | 74436862   | -1419                        |
| Rara               | NM_009024                       | chr11             | 98797364     | 98797843   | -1406                        |
| Nfatc4             | NM_001168346                    | chr14             | 56442043     | 56442539   | -1340                        |
| Camk2n2            | NM_028420                       | chr16             | 20622436     | 20622741   | -1239                        |
| Zfp866             | NM_177899                       | chr8              | 72299842     | 72300204   | -1214                        |
| Abcb1b             | NM_011075                       | chr5              | 8796754      | 8797217    | -1161                        |
| Ier2               | NM_010499                       | chr8              | 87187673     | 87188088   | -1131                        |
| Fosl2              | NM_008037                       | chr5              | 32437521     | 32437992   | -1088                        |
| Gm10440            | NR_038045                       | chr5              | 54740004     | 54740360   | -1048                        |
| Pkn3               | NM_153805                       | chr2              | 29933082     | 29933450   | -1019                        |
| Trib1              | NM_144549                       | chr15             | 59478979     | 59479433   | -1002                        |
| Acvr2b             | NM_007397                       | chr9              | 119310485    | 119310796  | -978                         |
| Pbx3               | NM_016768                       | chr2              | 34228224     | 34228843   | -970                         |
| Khdrbs1            | NR_045036                       | chr4              | 129420421    | 129420593  | -961                         |
| Maz                | NM_010772                       | chr7              | 134170755    | 134171105  | -938                         |
| Hivep2             | NM_010437                       | chr10             | 13685065     | 13685436   | -934                         |
| Fam222a            | NM_001004180                    | chr5              | 115017203    | 115017485  | -915                         |
| Spata20            | NM_144827                       | chr11             | 94347377     | 94347625   | -878                         |
| Kcnj16             | NM_010604                       | chr11             | 110828322    | 110828620  | -875                         |
| Mirlet7i           | NR_029527                       | chr10             | 122423498    | 122423695  | -818                         |
| Iqsec2             | NM_001005475                    | chrX              | 148612598    | 148612890  | -807                         |
| Arid1a             | NM_001080819                    | chr4              | 133310144    | 133310507  | -801                         |
| Sox12              | NM_011438                       | chr2              | 152224319    | 152224788  | -773                         |
| Irs2               | NM_001081212                    | chr8              | 11008985     | 11009402   | -765                         |
| Ppp1r9b            | NM_172261                       | chr11             | 94851628     | 94851938   | -742                         |
| Mir1191b           | NR_106141                       | chr10             | 80879519     | 80880035   | -736                         |
| Pds5a              | NM_001081321                    | chr5              | 66089597     | 66090035   | -722                         |
| Dennd4b            | NM_201407                       | chr3              | 90069551     | 90069905   | -707                         |
| Mall               | NM_145532                       | chr2              | 127556141    | 127556505  | -691                         |
| Eif3b              | NM_133916                       | chr5              | 140894416    | 140894729  | -686                         |
| Gng11              | NM_025331                       | chr6              | 3953143      | 3953461    | -684                         |

**Supplemental Table 3. Significant ChIP-seq E2F3A promoter peaks  
(+/- 2kb from the TSS)**

| <b>Gene Symbol</b> | <b>Refseq<br/>Transcript ID</b> | <b>Chromosome</b> | <b>Start</b> | <b>End</b> | <b>distance<br/>from TSS</b> |
|--------------------|---------------------------------|-------------------|--------------|------------|------------------------------|
| Map3k3             | NM_011947                       | chr11             | 105945346    | 105945731  | -677                         |
| Cnot1              | NM_001205226                    | chr8              | 98331895     | 98332144   | -659                         |
| 4930577N17Rik      | NR_073429                       | chr3              | 51079804     | 51080251   | -655                         |
| Khsrp              | NM_010613                       | chr17             | 57171323     | 57171833   | -649                         |
| Pfn1               | NM_011072                       | chr11             | 70468578     | 70468943   | -610                         |
| Baz1b              | NM_011714                       | chr5              | 135662408    | 135662764  | -606                         |
| Srsf3              | NM_013663                       | chr17             | 29168828     | 29169173   | -604                         |
| Pidd1              | NM_022654                       | chr7              | 148629650    | 148630024  | -584                         |
| Zfp64              | NM_009564                       | chr2              | 168781430    | 168781884  | -571                         |
| Lce3b              | NM_025501                       | chr3              | 92736194     | 92736483   | -562                         |
| Pop7               | NM_028753                       | chr5              | 137944026    | 137944389  | -552                         |
| Rnf26              | NM_153762                       | chr9              | 43921511     | 43921853   | -549                         |
| Pim1               | NM_008842                       | chr17             | 29627229     | 29627673   | -538                         |
| Gm53               | NR_037977                       | chr11             | 96112217     | 96112659   | -535                         |
| Sash1              | NM_175155                       | chr10             | 8606223      | 8606575    | -532                         |
| Lrif1              | NM_001039478                    | chr3              | 106487201    | 106487543  | -532                         |
| Fchsd2             | NM_001146010                    | chr7              | 108256592    | 108256930  | -527                         |
| Abhd13             | NM_026868                       | chr8              | 9977001      | 9977415    | -508                         |
| Ubp2               | NM_026872                       | chr4              | 41222431     | 41222888   | -493                         |
| Sertad2            | NM_001038625                    | chr11             | 20531334     | 20531646   | -489                         |
| Xpo1               | NM_001035226                    | chr11             | 23155393     | 23155714   | -487                         |
| Zfp36l2            | NM_001001806                    | chr17             | 84587369     | 84588153   | -475                         |
| Usp28              | NM_175482                       | chr9              | 48792870     | 48793176   | -466                         |
| Mir148a            | NR_029719                       | chr6              | 51220190     | 51220537   | -456                         |
| Gphn               | NM_145965                       | chr12             | 79327037     | 79327351   | -447                         |
| Cd3eap             | NM_145822                       | chr7              | 19945100     | 19945456   | -447                         |
| Afmid              | NM_027827                       | chr11             | 117686650    | 117686948  | -433                         |
| Hnrnpa0            | NM_029872                       | chr13             | 58230243     | 58230447   | -429                         |
| Rps19              | NM_023133                       | chr7              | 25669159     | 25669447   | -429                         |
| Stag1              | NM_009282                       | chr9              | 100543494    | 100543746  | -421                         |
| Ric8b              | NM_183172                       | chr10             | 84379755     | 84380136   | -412                         |
| Eef1a1             | NM_010106                       | chr9              | 78329742     | 78330077   | -380                         |
| Gls2               | NM_001033264                    | chr10             | 127631095    | 127631534  | -376                         |
| Raph1              | NM_001045513                    | chr1              | 60623805     | 60624157   | -373                         |
| Ccne1              | NM_007633                       | chr7              | 38892644     | 38893110   | -369                         |
| Slmo2              | NM_025531                       | chr2              | 174298619    | 174298999  | -368                         |
| Zfp219             | NM_001253694                    | chr14             | 52639376     | 52640124   | -363                         |
| Ciart              | NM_001033302                    | chr3              | 95686339     | 95686671   | -355                         |
| Osgepl1            | NM_001285839                    | chr1              | 53369952     | 53370275   | -354                         |
| Otud4              | NM_001256033                    | chr8              | 82162890     | 82163553   | -353                         |
| Mxd3               | NM_016662                       | chr13             | 55431175     | 55431695   | -345                         |
| Gm608              | NM_001029889                    | chr16             | 44173041     | 44173292   | -343                         |
| Fbxo5              | NM_025995                       | chr10             | 4540287      | 4541184    | -340                         |
| Ezh2               | NM_007971                       | chr6              | 47545037     | 47545698   | -340                         |
| Rev1               | NM_019570                       | chr1              | 38186657     | 38187027   | -336                         |
| Smc3               | NM_007790                       | chr19             | 53674353     | 53674750   | -334                         |
| Hmgb2              | NM_008252                       | chr8              | 59990088     | 59990539   | -326                         |

**Supplemental Table 3. Significant ChIP-seq E2F3A promoter peaks  
(+/- 2kb from the TSS)**

| <b>Gene Symbol</b> | <b>Refseq<br/>Transcript ID</b> | <b>Chromosome</b> | <b>Start</b> | <b>End</b> | <b>distance<br/>from TSS</b> |
|--------------------|---------------------------------|-------------------|--------------|------------|------------------------------|
| Klf10              | NM_001289471                    | chr15             | 38230585     | 38230994   | -325                         |
| Ipo5               | NM_023579                       | chr14             | 121309900    | 121310287  | -322                         |
| Rictor             | NM_030168                       | chr15             | 6657926      | 6658197    | -319                         |
| Ccng2              | NM_007635                       | chr5              | 93696141     | 93696421   | -317                         |
| Calm2              | NM_007589                       | chr17             | 87846482     | 87846697   | -316                         |
| Tbl2               | NM_013763                       | chr5              | 135625088    | 135625445  | -314                         |
| Supt16             | NM_033618                       | chr14             | 52817080     | 52817370   | -312                         |
| Zmym6              | NM_177462                       | chr4              | 126754134    | 126754499  | -310                         |
| Foxn2              | NM_180974                       | chr17             | 88839508     | 88839977   | -309                         |
| Ywhaq              | NM_011739                       | chr12             | 21423457     | 21423749   | -307                         |
| Ube2d2a            | NM_019912                       | chr18             | 35930710     | 35931112   | -301                         |
| 2310057M21Rik      | NM_026655                       | chr7              | 138506306    | 138506717  | -301                         |
| Zfp609             | NM_172536                       | chr9              | 65675546     | 65675788   | -297                         |
| Rbm33              | NM_028234                       | chr5              | 28643062     | 28643801   | -297                         |
| Hnrnpul1           | NM_144922                       | chr7              | 26539744     | 26540317   | -293                         |
| Lgals1             | NM_008495                       | chr15             | 78756625     | 78757103   | -290                         |
| Cenpb              | NM_007682                       | chr2              | 131005897    | 131006172  | -288                         |
| Lrwd1              | NM_027891                       | chr5              | 136612064    | 136612392  | -285                         |
| Btbd8              | NM_001255991                    | chr5              | 107866497    | 107866970  | -282                         |
| Ptma               | NM_008972                       | chr1              | 88422727     | 88423335   | -279                         |
| Mmp16              | NM_019724                       | chr4              | 17780217     | 17780484   | -278                         |
| Pars2              | NM_001285783                    | chr4              | 106323180    | 106323611  | -278                         |
| Azin1              | NM_018745                       | chr15             | 38449088     | 38449505   | -277                         |
| Lmnb1              | NM_010721                       | chr18             | 56867046     | 56867334   | -276                         |
| Mir199b            | NR_029811                       | chr2              | 32173509     | 32173904   | -273                         |
| Pabpc1             | NM_008774                       | chr15             | 36538720     | 36539273   | -270                         |
| Plekhh3            | NM_146030                       | chr11             | 101032700    | 101033058  | -264                         |
| Ptk7               | NM_175168                       | chr17             | 46766571     | 46766857   | -262                         |
| Hinfp              | NM_172162                       | chr9              | 44113886     | 44114139   | -260                         |
| Tmub2              | NM_028076                       | chr11             | 102145792    | 102146240  | -258                         |
| Aff1               | NM_133919                       | chr5              | 104182759    | 104183092  | -255                         |
| Celf6              | NM_175235                       | chr9              | 59425706     | 59426076   | -252                         |
| Uhrf1              | NM_001111080                    | chr17             | 56443159     | 56443812   | -250                         |
| Cirbp              | NM_007705                       | chr10             | 79630060     | 79630621   | -245                         |
| Psma1              | NM_011965                       | chr7              | 121419706    | 121420035  | -242                         |
| Vav3               | NM_146139                       | chr3              | 109376504    | 109376862  | -241                         |
| Acy1               | NM_001276442                    | chr9              | 106340631    | 106340983  | -241                         |
| Utp3               | NM_023054                       | chr5              | 88983033     | 88983501   | -240                         |
| Plec               | NM_201394                       | chr15             | 76026158     | 76026597   | -239                         |
| Plekha1            | NM_133942                       | chr7              | 138008989    | 138009382  | -238                         |
| Srsf10             | NM_001284196                    | chr4              | 135411442    | 135412054  | -237                         |
| Phf23              | NM_030064                       | chr11             | 69808753     | 69809320   | -231                         |
| Casp2              | NM_007610                       | chr6              | 42214668     | 42214947   | -230                         |
| Rab6a              | NM_001163663                    | chr7              | 107755723    | 107756018  | -229                         |
| E2f8               | NM_001013368                    | chr7              | 56136467     | 56136806   | -227                         |
| Pcbp2              | NM_011042                       | chr15             | 102300671    | 102301001  | -226                         |
| Kpna3              | NM_008466                       | chr14             | 62058735     | 62059277   | -223                         |

**Supplemental Table 3. Significant ChIP-seq E2F3A promoter peaks  
(+/- 2kb from the TSS)**

| <b>Gene Symbol</b> | <b>Refseq<br/>Transcript ID</b> | <b>Chromosome</b> | <b>Start</b> | <b>End</b> | <b>distance<br/>from TSS</b> |
|--------------------|---------------------------------|-------------------|--------------|------------|------------------------------|
| Klf5               | NM_009769                       | chr14             | 99697540     | 99697835   | -222                         |
| Nadk2              | NM_001286255                    | chr15             | 9000484      | 9001089    | -222                         |
| Zfp869             | NM_001039965                    | chr8              | 72240764     | 72241278   | -221                         |
| Maff               | NM_010755                       | chr15             | 79177692     | 79178081   | -221                         |
| Capn7              | NM_009796                       | chr14             | 32149479     | 32149903   | -218                         |
| Srsf4              | NM_020587                       | chr4              | 131429080    | 131429590  | -218                         |
| Dctn1              | NM_001198866                    | chr6              | 83115495     | 83115906   | -217                         |
| Herpud1            | NM_022331                       | chr8              | 96909969     | 96910398   | -216                         |
| Wdr1               | NM_011715                       | chr5              | 38952911     | 38953185   | -215                         |
| Zmynd19            | NM_026021                       | chr2              | 24804905     | 24805312   | -213                         |
| Gltf               | NM_019821                       | chr5              | 115141042    | 115141267  | -212                         |
| Nup50              | NM_016714                       | chr15             | 84753390     | 84753903   | -211                         |
| Gpatch8            | NM_001159492                    | chr11             | 102417392    | 102417970  | -210                         |
| Cdca7              | NM_025866                       | chr2              | 72313815     | 72314315   | -210                         |
| Hspa8              | NM_031165                       | chr9              | 40608934     | 40609357   | -210                         |
| Stt3b              | NM_024222                       | chr9              | 115219522    | 115219968  | -207                         |
| Fam76b             | NM_176836                       | chr9              | 13631802     | 13632125   | -207                         |
| Mllt1              | NM_022328                       | chr17             | 57074838     | 57075194   | -206                         |
| Dgcr8              | NM_033324                       | chr16             | 18289244     | 18289682   | -203                         |
| Myh9               | NM_022410                       | chr15             | 77672601     | 77673002   | -198                         |
| P4hb               | NM_011032                       | chr11             | 120434341    | 120434551  | -197                         |
| Nucks1             | NM_001145804                    | chr1              | 133806492    | 133807183  | -197                         |
| Micu1              | NM_001291442                    | chr10             | 59164909     | 59165319   | -196                         |
| Cstf3              | NM_145529                       | chr2              | 104430265    | 104430624  | -196                         |
| Hist1h4a           | NM_178192                       | chr13             | 23853025     | 23853599   | -195                         |
| Gan                | NM_001081151                    | chr8              | 119681690    | 119681988  | -195                         |
| lft140             | NM_134126                       | chr17             | 25152481     | 25153190   | -195                         |
| C330013E15Rik      | NR_045701                       | chr15             | 100445536    | 100445926  | -191                         |
| Cbx3               | NM_007624                       | chr6              | 51420290     | 51420559   | -190                         |
| Arid3a             | NM_007880                       | chr10             | 79389417     | 79389780   | -189                         |
| lft80              | NM_026641                       | chr3              | 68808288     | 68809071   | -189                         |
| Casp8ap2           | NM_001122978                    | chr4              | 32702085     | 32702436   | -187                         |
| Nudt18             | NM_153136                       | chr14             | 70977298     | 70977636   | -186                         |
| Gpr180             | NM_021434                       | chr14             | 118535990    | 118536334  | -186                         |
| Ran                | NM_009391                       | chr5              | 129525644    | 129526044  | -186                         |
| H2afx              | NM_010436                       | chr9              | 44142402     | 44142820   | -186                         |
| Atxn2l             | NM_183020                       | chr7              | 133646780    | 133647221  | -186                         |
| Ppil1              | NM_026845                       | chr17             | 29400769     | 29401431   | -185                         |
| Fam208a            | NM_028945                       | chr14             | 28241705     | 28241992   | -184                         |
| Rbl1               | NM_011249                       | chr2              | 157030131    | 157030771  | -182                         |
| Adss               | NM_007422                       | chr1              | 179726659    | 179726981  | -181                         |
| Birc6              | NM_007566                       | chr17             | 74927277     | 74927629   | -181                         |
| Cep152             | NM_001081091                    | chr2              | 125450932    | 125451126  | -181                         |
| Ap1ar              | NM_145964                       | chr3              | 127540474    | 127540706  | -181                         |
| Mapk1ip1l          | NM_178684                       | chr14             | 47917619     | 47917997   | -180                         |
| Ppp1cc             | NM_013636                       | chr5              | 122607885    | 122608336  | -177                         |
| Vmn2r108           | NM_001104570                    | chr17             | 20618190     | 20618559   | -176                         |

**Supplemental Table 3. Significant ChIP-seq E2F3A promoter peaks  
(+/- 2kb from the TSS)**

| <b>Gene Symbol</b> | <b>Refseq<br/>Transcript ID</b> | <b>Chromosome</b> | <b>Start</b> | <b>End</b> | <b>distance<br/>from TSS</b> |
|--------------------|---------------------------------|-------------------|--------------|------------|------------------------------|
| Dsc1               | NM_183089                       | chr15             | 54921995     | 54922416   | -174                         |
| Gtpbp2             | NM_019581                       | chr17             | 46297623     | 46297990   | -174                         |
| Rcl1               | NM_021525                       | chr19             | 29175452     | 29175930   | -173                         |
| Ndst3              | NR_121616                       | chr3              | 123393811    | 123394065  | -169                         |
| Arhgef40           | NM_001145921                    | chr14             | 52604185     | 52604493   | -168                         |
| Itpr1              | NM_010585                       | chr6              | 108162834    | 108163014  | -165                         |
| Cdc6               | NM_001025779                    | chr11             | 98768826     | 98769251   | -164                         |
| Rps20              | NM_026147                       | chr4              | 3762720      | 3763099    | -164                         |
| Fmnl3              | NM_011711                       | chr15             | 99200783     | 99201335   | -163                         |
| Tssc4              | NM_138631                       | chr7              | 150254843    | 150255375  | -163                         |
| Kif13b             | NM_001081177                    | chr14             | 65271040     | 65271371   | -162                         |
| Ddost              | NM_007838                       | chr4              | 137860350    | 137860631  | -162                         |
| C630043F03Rik      | NR_027923                       | chr4              | 71861909     | 71862323   | -161                         |
| Rfwd3              | NM_146218                       | chr8              | 113824095    | 113824469  | -161                         |
| Cobll1             | NM_027225                       | chr2              | 65076763     | 65076922   | -161                         |
| Ppwd1              | NM_172807                       | chr13             | 105018881    | 105019285  | -160                         |
| Cnot6              | NM_212484                       | chr11             | 49526200     | 49526565   | -160                         |
| Slc35e1            | NM_177766                       | chr8              | 75016532     | 75016809   | -159                         |
| Trappc10           | NM_001081055                    | chr10             | 77707375     | 77707712   | -158                         |
| Nutf2              | NM_026532                       | chr8              | 108384187    | 108384565  | -157                         |
| Chaf1b             | NM_028083                       | chr16             | 93883677     | 93884300   | -157                         |
| Fem1a              | NM_010192                       | chr17             | 56395896     | 56396223   | -156                         |
| Txndc17            | NM_026559                       | chr11             | 72020742     | 72021061   | -154                         |
| Xpot               | NM_001081056                    | chr10             | 121063383    | 121063665  | -153                         |
| Irf2bp1            | NM_178757                       | chr7              | 19589119     | 19589402   | -153                         |
| Hist1h4f           | NM_175655                       | chr13             | 23643465     | 23643861   | -152                         |
| Chaf1a             | NM_013733                       | chr17             | 56179534     | 56179838   | -152                         |
| Dnmt1              | NM_001199433                    | chr9              | 20756868     | 20757568   | -152                         |
| U2af1              | NM_024187                       | chr17             | 31795668     | 31796031   | -152                         |
| Wdr89              | NM_028203                       | chr12             | 76770491     | 76770855   | -150                         |
| Stard4             | NM_133774                       | chr18             | 33373454     | 33373784   | -150                         |
| 1810026B05Rik      | NR_037569                       | chr7              | 80703272     | 80703585   | -149                         |
| Slc39a1            | NM_013901                       | chr3              | 90051803     | 90052128   | -148                         |
| Nup85              | NM_001002929                    | chr11             | 115425287    | 115425934  | -147                         |
| Cyp39a1            | NM_001285948                    | chr17             | 43803966     | 43804381   | -147                         |
| Epb4.113           | NM_013813                       | chr17             | 69505815     | 69506194   | -145                         |
| Tra2b              | NM_009186                       | chr16             | 22265939     | 22266351   | -144                         |
| Ccnl1              | NM_019937                       | chr3              | 65762053     | 65762527   | -144                         |
| Tef                | NM_017376                       | chr15             | 81641570     | 81641829   | -144                         |
| Piezo1             | NM_001037298                    | chr8              | 125075196    | 125075547  | -144                         |
| Rbbp4              | NM_009030                       | chr4              | 129012505    | 129013006  | -143                         |
| Hist1h3g           | NM_145073                       | chr13             | 23626868     | 23627420   | -142                         |
| Akap11             | NM_001164503                    | chr14             | 78936623     | 78936992   | -142                         |
| Lamtor2            | NM_031248                       | chr3              | 88356822     | 88357157   | -142                         |
| Bard1              | NM_007525                       | chr1              | 71149520     | 71149851   | -141                         |
| Snx18              | NM_130796                       | chr13             | 114408769    | 114409054  | -141                         |
| Zfp706             | NM_026521                       | chr15             | 36937119     | 36937474   | -141                         |

**Supplemental Table 3. Significant ChIP-seq E2F3A promoter peaks  
(+/- 2kb from the TSS)**

| <b>Gene Symbol</b> | <b>Refseq<br/>Transcript ID</b> | <b>Chromosome</b> | <b>Start</b> | <b>End</b> | <b>distance<br/>from TSS</b> |
|--------------------|---------------------------------|-------------------|--------------|------------|------------------------------|
| Ubqln4             | NM_033526                       | chr3              | 88357366     | 88357627   | -141                         |
| Nop56              | NM_024193                       | chr2              | 130099663    | 130100351  | -140                         |
| Zfp382             | NM_001081007                    | chr7              | 30906657     | 30906996   | -140                         |
| Alg8               | NM_199035                       | chr7              | 104519788    | 104520185  | -140                         |
| Ugp2               | NM_001290634                    | chr11             | 21271282     | 21271533   | -139                         |
| Hist1h2af          | NM_175661                       | chr13             | 23625434     | 23625847   | -139                         |
| Trim59             | NM_025863                       | chr3              | 68848611     | 68848992   | -139                         |
| Tmpo               | NM_001080129                    | chr10             | 90634300     | 90634702   | -138                         |
| Ap5z1              | NM_172725                       | chr5              | 142939544    | 142939948  | -138                         |
| Pelp1              | NM_029231                       | chr11             | 70223529     | 70223808   | -137                         |
| Zw10               | NM_012039                       | chr9              | 48863329     | 48863768   | -137                         |
| Ccno               | NM_001081062                    | chr13             | 113777681    | 113778066  | -136                         |
| Dnajc14            | NM_028873                       | chr10             | 128242444    | 128242749  | -135                         |
| Vamp3              | NM_009498                       | chr4              | 150431993    | 150432398  | -135                         |
| Rpa2               | NM_011284                       | chr4              | 132323936    | 132324344  | -134                         |
| 3110082117Rik      | NM_028469                       | chr5              | 139936445    | 139936796  | -134                         |
| Rell1              | NM_145923                       | chr5              | 64360098     | 64360438   | -133                         |
| Mki67              | NM_001081117                    | chr7              | 142907917    | 142908470  | -133                         |
| Ptges3             | NM_019766                       | chr10             | 127495748    | 127496062  | -132                         |
| Tfap4              | NM_031182                       | chr16             | 4559679      | 4560023    | -132                         |
| Pisd-ps2           | NR_003519                       | chr17             | 3084083      | 3084545    | -132                         |
| A630066F11Rik      | NR_030698                       | chr10             | 7382746      | 7383330    | -130                         |
| Slc15a4            | NM_133895                       | chr5              | 128097751    | 128098030  | -130                         |
| Atl2               | NM_178050                       | chr17             | 80295419     | 80295761   | -128                         |
| Psmc4              | NM_011874                       | chr7              | 28835112     | 28835364   | -128                         |
| Map2k7             | NM_001164172                    | chr8              | 4238371      | 4238851    | -128                         |
| Fam111a            | NM_026640                       | chr19             | 12647694     | 12648079   | -128                         |
| Kdm3a              | NM_001038695                    | chr6              | 71582910     | 71583164   | -127                         |
| Smarcd1            | NM_031842                       | chr15             | 99532355     | 99532828   | -126                         |
| Rfc5               | NM_028128                       | chr5              | 117838944    | 117839368  | -125                         |
| Fhod1              | NM_177699                       | chr8              | 107871666    | 107872322  | -125                         |
| lpo11              | NM_029665                       | chr13             | 107726988    | 107727249  | -125                         |
| Kras               | NM_021284                       | chr6              | 145198789    | 145198960  | -125                         |
| Tor1aip2           | NM_172843                       | chr1              | 157882498    | 157882841  | -124                         |
| Arrb2              | NM_145429                       | chr11             | 70245815     | 70246100   | -124                         |
| Zfp280d            | NM_146224                       | chr9              | 72122376     | 72122788   | -123                         |
| Hist1h2ag          | NM_178186                       | chr13             | 22134772     | 22135106   | -122                         |
| Kif24              | NM_024241                       | chr4              | 41411817     | 41412187   | -122                         |
| Cenpp              | NM_025495                       | chr13             | 49748049     | 49748392   | -122                         |
| Skap2              | NM_018773                       | chr6              | 51962504     | 51962832   | -121                         |
| Msh2               | NM_008628                       | chr17             | 88071595     | 88071957   | -120                         |
| Atad2              | NM_027435                       | chr15             | 57966325     | 57967186   | -120                         |
| Apoo               | NM_026673                       | chrX              | 91612145     | 91612516   | -118                         |
| Commd9             | NM_029635                       | chr2              | 101726177    | 101726427  | -116                         |
| Tmtc4              | NM_028651                       | chr14             | 123382381    | 123382814  | -116                         |
| Nolc1              | NM_053086                       | chr19             | 46149969     | 46150472   | -116                         |
| Nupl1              | NM_170591                       | chr14             | 60870218     | 60870440   | -115                         |

**Supplemental Table 3. Significant ChIP-seq E2F3A promoter peaks  
(+/- 2kb from the TSS)**

| <b>Gene Symbol</b> | <b>Refseq<br/>Transcript ID</b> | <b>Chromosome</b> | <b>Start</b> | <b>End</b> | <b>distance<br/>from TSS</b> |
|--------------------|---------------------------------|-------------------|--------------|------------|------------------------------|
| Srsf3              | NM_013663                       | chr17             | 29169268     | 29169710   | -115                         |
| Smdt1              | NM_026914                       | chr15             | 82176206     | 82176520   | -112                         |
| Mid1ip1            | NM_026524                       | chrX              | 10294163     | 10294594   | -112                         |
| Ado                | NM_001005419                    | chr10             | 67011665     | 67011961   | -111                         |
| Iscu               | NM_025526                       | chr5              | 114222608    | 114222810  | -111                         |
| Brpf3              | NM_001081315                    | chr17             | 28937770     | 28938149   | -111                         |
| Nop58              | NM_018868                       | chr1              | 59741521     | 59741958   | -110                         |
| Ccnf               | NM_007634                       | chr17             | 24388205     | 24388720   | -110                         |
| Mcm6               | NM_008567                       | chr1              | 130256193    | 130256488  | -109                         |
| Larp4b             | NM_172585                       | chr13             | 9092904      | 9093180    | -108                         |
| Mrps17             | NM_025450                       | chr5              | 130221159    | 130221429  | -108                         |
| Wee1               | NM_009516                       | chr7              | 117265285    | 117265644  | -108                         |
| Srsf2              | NM_011358                       | chr11             | 116714190    | 116714838  | -107                         |
| Npat               | NM_001081152                    | chr9              | 53344851     | 53345237   | -107                         |
| Pa2g4              | NM_011119                       | chr10             | 128002961    | 128003228  | -106                         |
| Wwp2               | NM_025830                       | chr8              | 109960029    | 109960354  | -106                         |
| Nap1l1             | NM_015781                       | chr10             | 110909912    | 110910373  | -105                         |
| Msh5               | NM_001146215                    | chr17             | 35183401     | 35184142   | -105                         |
| Spr                | NM_011467                       | chr6              | 85087672     | 85088051   | -105                         |
| Cenpm              | NM_001080158                    | chr15             | 82074669     | 82075068   | -104                         |
| Btf3l4             | NM_027453                       | chr4              | 108506122    | 108506458  | -102                         |
| Sntb2              | NM_009229                       | chr8              | 109459369    | 109459725  | -102                         |
| Kpnb1              | NM_008379                       | chr11             | 97049155     | 97049458   | -102                         |
| Rmi2               | NM_001162932                    | chr16             | 10834788     | 10835313   | -101                         |
| Rrn3               | NM_001039521                    | chr16             | 13780478     | 13780904   | -100                         |
| Rps27l             | NM_026467                       | chr9              | 66793693     | 66793955   | -100                         |
| Ncln               | NM_134009                       | chr10             | 80959040     | 80959373   | -100                         |
| Tmx1               | NM_028339                       | chr12             | 71553893     | 71554188   | -100                         |
| Akip1              | NM_020616                       | chr7              | 116846997    | 116847304  | -100                         |
| Mis18bp1           | NM_172578                       | chr12             | 66273553     | 66273777   | -99                          |
| Khsrp              | NM_010613                       | chr17             | 57170772     | 57171284   | -99                          |
| Elmo2              | NM_207706                       | chr2              | 165151939    | 165152215  | -99                          |
| Zbtbd6             | NM_001034882                    | chr14             | 79851388     | 79851697   | -99                          |
| Rpl3               | NM_013762                       | chr15             | 79913734     | 79914132   | -98                          |
| Prpf19             | NM_134129                       | chr19             | 10969465     | 10969780   | -98                          |
| Megf9              | NM_172694                       | chr4              | 70195853     | 70196264   | -98                          |
| Pitpnb             | NM_019640                       | chr5              | 111759485    | 111759885  | -97                          |
| Suz12              | NM_001163018                    | chr11             | 79806323     | 79806699   | -96                          |
| Gcat               | NM_001161712                    | chr15             | 78861088     | 78861326   | -96                          |
| Hmgb1              | NM_010439                       | chr5              | 149864537    | 149864877  | -95                          |
| Zfp367             | NM_175494                       | chr13             | 64254412     | 64254789   | -95                          |
| Smchd1             | NM_028887                       | chr17             | 71824596     | 71824955   | -94                          |
| Pigm               | NM_026234                       | chr1              | 174306438    | 174306699  | -93                          |
| Naglu              | NM_013792                       | chr11             | 100931147    | 100931482  | -93                          |
| Echs1              | NM_053119                       | chr7              | 147302202    | 147302624  | -92                          |
| Msmo1              | NM_025436                       | chr8              | 67212234     | 67212698   | -92                          |
| Rasl11b            | NM_026878                       | chr5              | 74591082     | 74591435   | -92                          |

**Supplemental Table 3. Significant ChIP-seq E2F3A promoter peaks  
(+/- 2kb from the TSS)**

| <b>Gene Symbol</b> | <b>Refseq<br/>Transcript ID</b> | <b>Chromosome</b> | <b>Start</b> | <b>End</b> | <b>distance<br/>from TSS</b> |
|--------------------|---------------------------------|-------------------|--------------|------------|------------------------------|
| Ncapg2             | NM_133762                       | chr12             | 117643541    | 117644026  | -91                          |
| Gpr137c            | NM_027518                       | chr14             | 45839090     | 45839511   | -91                          |
| Naa16              | NM_025832                       | chr14             | 79790417     | 79790712   | -91                          |
| Crkl               | NM_001277231                    | chr16             | 17451846     | 17452127   | -91                          |
| BC003331           | NM_001077237                    | chr1              | 152239963    | 152240584  | -90                          |
| A430005L14Rik      | NM_175287                       | chr4              | 153331067    | 153331444  | -90                          |
| Brip1              | NM_178309                       | chr11             | 86014528     | 86015038   | -89                          |
| Mef2b              | NM_001045484                    | chr8              | 72676444     | 72676730   | -89                          |
| Nhp2l1             | NM_011482                       | chr15             | 81877951     | 81878280   | -89                          |
| Hnrnpa3            | NM_198090                       | chr2              | 75496975     | 75497478   | -89                          |
| Upf3b              | NM_026573                       | chrX              | 34650195     | 34650614   | -89                          |
| Tcf19              | NM_001163764                    | chr17             | 35653508     | 35654204   | -88                          |
| Ate1               | NM_001136054                    | chr7              | 137662975    | 137663386  | -88                          |
| Cenpi              | NM_145924                       | chrX              | 130842497    | 130842730  | -88                          |
| Ppp1r16a           | NM_033371                       | chr15             | 76501844     | 76502200   | -87                          |
| Fkbp2              | NM_001166368                    | chr19             | 7054912      | 7055159    | -86                          |
| Spc25              | NM_025565                       | chr2              | 69044107     | 69044555   | -85                          |
| 4930432K21Rik      | NM_001163752                    | chr8              | 86671634     | 86672069   | -85                          |
| Peak1              | NM_172924                       | chr9              | 56265843     | 56266038   | -85                          |
| Mybl2              | NM_008652                       | chr2              | 162880005    | 162880567  | -84                          |
| Osbp18             | NM_175489                       | chr10             | 110601590    | 110601958  | -83                          |
| Spg7               | NM_153176                       | chr8              | 125589168    | 125589480  | -83                          |
| Ttll5              | NM_001081423                    | chr12             | 87165654     | 87165979   | -83                          |
| Tex9               | NM_009359                       | chr9              | 72339581     | 72340113   | -82                          |
| Fkbp5              | NM_010220                       | chr17             | 28623055     | 28623294   | -82                          |
| Ufsp2              | NM_138668                       | chr8              | 47060616     | 47060983   | -82                          |
| Polr2m             | NM_178602                       | chr9              | 71333749     | 71333992   | -82                          |
| Aph1a              | NM_146104                       | chr3              | 95697598     | 95697927   | -81                          |
| Mcmbp              | NM_145955                       | chr7              | 135883927    | 135884117  | -80                          |
| Cdc25a             | NM_007658                       | chr9              | 109777682    | 109778323  | -80                          |
| Cdk1               | NM_007659                       | chr10             | 68815437     | 68816039   | -79                          |
| Serf1              | NM_011353                       | chr13             | 100877774    | 100878015  | -79                          |
| Zc3h6              | NM_178404                       | chr2              | 128792911    | 128793206  | -79                          |
| Pnkd               | NM_001039509                    | chr1              | 74331371     | 74331687   | -78                          |
| Cntrl              | NM_012018                       | chr2              | 34964741     | 34965125   | -78                          |
| Phactr4            | NM_001161797                    | chr4              | 131978307    | 131978569  | -78                          |
| Gm20604            | NM_001142939                    | chr12             | 103995957    | 103996234  | -77                          |
| Ost4               | NM_001134692                    | chr5              | 31210073     | 31210400   | -77                          |
| Nktr               | NM_010918                       | chr9              | 121627992    | 121628451  | -77                          |
| Tmem39b            | NM_199305                       | chr4              | 129374017    | 129374297  | -76                          |
| Slc25a25           | NM_146118                       | chr2              | 32306809     | 32307320   | -76                          |
| Mapk7              | NM_001291035                    | chr11             | 61307629     | 61308055   | -75                          |
| Tcp1               | NM_013686                       | chr17             | 13108858     | 13109380   | -75                          |
| Ap1s1              | NM_007457                       | chr5              | 137521853    | 137522155  | -75                          |
| Supt3              | NM_178652                       | chr17             | 44913891     | 44914198   | -75                          |
| Ranbp1             | NM_011239                       | chr16             | 18248650     | 18249070   | -74                          |
| Wwc2               | NM_133791                       | chr8              | 49075791     | 49076164   | -74                          |



**Supplemental Table 3. Significant ChIP-seq E2F3A promoter peaks  
(+/- 2kb from the TSS)**

| <b>Gene Symbol</b> | <b>Refseq<br/>Transcript ID</b> | <b>Chromosome</b> | <b>Start</b> | <b>End</b> | <b>distance<br/>from TSS</b> |
|--------------------|---------------------------------|-------------------|--------------|------------|------------------------------|
| Tmpo               | NM_001283048                    | chr10             | 90633133     | 90633601   | -73                          |
| Pcbd2              | NM_028281                       | chr13             | 55828534     | 55828776   | -73                          |
| Cdkal1             | NM_144536                       | chr13             | 29947389     | 29947668   | -73                          |
| Rbm39              | NM_001291114                    | chr2              | 156005848    | 156006243  | -73                          |
| Ctdspl2            | NM_212450                       | chr2              | 121781493    | 121781835  | -72                          |
| 4930427A07Rik      | NM_134041                       | chr12             | 114394392    | 114394727  | -72                          |
| Eif3d              | NM_018749                       | chr15             | 77801127     | 77801522   | -72                          |
| Tpp2               | NM_009418                       | chr1              | 43990601     | 43990959   | -71                          |
| B230219D22Rik      | NM_181278                       | chr13             | 55794267     | 55794559   | -71                          |
| Spdya              | NM_029254                       | chr17             | 71901235     | 71901423   | -71                          |
| Iqgap3             | NM_001033484                    | chr3              | 87885637     | 87886165   | -71                          |
| Tmem106c           | NM_201359                       | chr15             | 97794412     | 97794768   | -69                          |
| Mapk14             | NM_011951                       | chr17             | 28828005     | 28828429   | -69                          |
| Oip5               | NM_001042653                    | chr2              | 119444109    | 119444508  | -69                          |
| Timm50             | NM_025616                       | chr7              | 29096976     | 29097289   | -69                          |
| Snrpe              | NM_009227                       | chr1              | 135506820    | 135507028  | -68                          |
| Tagln2             | NM_178598                       | chr1              | 174430171    | 174430446  | -68                          |
| Pcgf6              | NM_027654                       | chr19             | 47125242     | 47125561   | -68                          |
| Clp1               | NM_133840                       | chr2              | 84567288     | 84567695   | -68                          |
| Hadhb              | NM_145558                       | chr5              | 30481554     | 30481897   | -67                          |
| Acer3              | NM_025408                       | chr7              | 105457971    | 105458234  | -67                          |
| Tnks               | NM_175091                       | chr8              | 36028619     | 36029000   | -67                          |
| 1700021F05Rik      | NM_026411                       | chr10             | 43260662     | 43261068   | -66                          |
| BC030867           | NM_153544                       | chr11             | 102109979    | 102110279  | -66                          |
| 2700099C18Rik      | NR_024720                       | chr17             | 95149241     | 95149505   | -66                          |
| Pcnt               | NM_008787                       | chr10             | 75905549     | 75905894   | -66                          |
| Ror2               | NM_013846                       | chr13             | 53381352     | 53381733   | -66                          |
| Eefsec             | NM_023060                       | chr6              | 88396441     | 88396753   | -65                          |
| Tbccd1             | NM_001081368                    | chr16             | 22857613     | 22857798   | -65                          |
| Dennd1a            | NM_146122                       | chr2              | 38142807     | 38143127   | -64                          |
| Psmb2              | NM_011970                       | chr4              | 126354703    | 126354941  | -64                          |
| Cdkn1a             | NM_007669                       | chr17             | 29230550     | 29230755   | -64                          |
| Snhg8              | NR_028574                       | chr3              | 123211011    | 123211621  | -63                          |
| Nop2               | NM_138747                       | chr6              | 125081633    | 125082041  | -63                          |
| Dnajb1             | NM_018808                       | chr8              | 86131783     | 86132237   | -63                          |
| Tmco1              | NM_001039483                    | chr1              | 169238557    | 169238918  | -63                          |
| Tsfm               | NM_025537                       | chr10             | 126467800    | 126468062  | -62                          |
| Psap               | NM_001146123                    | chr10             | 59740172     | 59740456   | -61                          |
| Gins3              | NM_030198                       | chr8              | 98157250     | 98157544   | -61                          |
| Zmiz1              | NM_183208                       | chr14             | 26278486     | 26278733   | -61                          |
| Mecp2              | NM_010788                       | chrX              | 71330931     | 71331245   | -60                          |
| Gm11974            | NR_045893                       | chr11             | 6428685      | 6428958    | -60                          |
| 1200014J11Rik      | NM_025818                       | chr11             | 72861139     | 72861478   | -60                          |
| Sp2                | NM_030220                       | chr11             | 96838962     | 96839159   | -60                          |
| Rab26os            | NR_045289                       | chr17             | 24664884     | 24665387   | -60                          |
| Dpm2               | NM_010073                       | chr2              | 32426043     | 32426592   | -60                          |
| Timm13             | NM_013895                       | chr10             | 80363579     | 80363965   | -59                          |

**Supplemental Table 3. Significant ChIP-seq E2F3A promoter peaks  
(+/- 2kb from the TSS)**

| <b>Gene Symbol</b> | <b>Refseq<br/>Transcript ID</b> | <b>Chromosome</b> | <b>Start</b> | <b>End</b> | <b>distance<br/>from TSS</b> |
|--------------------|---------------------------------|-------------------|--------------|------------|------------------------------|
| Mcm4               | NM_008565                       | chr16             | 15637320     | 15637782   | -59                          |
| Scaf1              | NM_001008422                    | chr7              | 52271467     | 52271887   | -59                          |
| Rps11              | NM_013725                       | chr7              | 52379641     | 52379993   | -59                          |
| Prim1              | NM_008921                       | chr10             | 127451966    | 127452458  | -58                          |
| Frg1               | NM_013522                       | chr8              | 42502430     | 42502628   | -58                          |
| Elmod2             | NM_178736                       | chr8              | 85856296     | 85856588   | -58                          |
| Cript              | NM_019936                       | chr17             | 87424646     | 87425039   | -58                          |
| Nfx1               | NM_001290449                    | chr4              | 40917697     | 40918065   | -57                          |
| Mmgt1              | NM_146234                       | chrX              | 53851022     | 53851280   | -56                          |
| Rbfox2             | NM_175387                       | chr15             | 77137313     | 77137762   | -56                          |
| Rer1               | NM_026395                       | chr4              | 154460283    | 154460637  | -55                          |
| Tubgcp3            | NM_198031                       | chr8              | 12672019     | 12672289   | -55                          |
| AI314180           | NM_172381                       | chr4              | 58925527     | 58925774   | -55                          |
| Tra2a              | NM_198102                       | chr6              | 49213989     | 49214220   | -55                          |
| Lin52              | NM_173756                       | chr12             | 85792288     | 85792518   | -54                          |
| Uba52              | NM_019883                       | chr8              | 73034074     | 73034563   | -54                          |
| Pigu               | NM_001004721                    | chr2              | 155183064    | 155183360  | -53                          |
| Nfyc               | NM_001277095                    | chr4              | 120498258    | 120498538  | -53                          |
| Hist2h4            | NM_033596                       | chr3              | 96067093     | 96067489   | -52                          |
| Dtl                | NM_029766                       | chr1              | 193399255    | 193399672  | -52                          |
| Msh6               | NM_010830                       | chr17             | 88374121     | 88374554   | -52                          |
| Wdhd1              | NM_172598                       | chr14             | 47896373     | 47896790   | -51                          |
| Ranbp3             | NM_001252467                    | chr17             | 56812314     | 56812879   | -51                          |
| Ppp1r8             | NM_146154                       | chr4              | 132398978    | 132399289  | -51                          |
| Fbxo48             | NM_176982                       | chr11             | 16851029     | 16851695   | -50                          |
| Mrpl12             | NM_027204                       | chr11             | 120345811    | 120346055  | -49                          |
| Prkab2             | NM_182997                       | chr3              | 97461946     | 97462224   | -49                          |
| Mthfd1             | NM_138745                       | chr12             | 77356063     | 77356276   | -49                          |
| Actl6b             | NM_031404                       | chr5              | 137994552    | 137994916  | -48                          |
| Anapc11            | NM_001038230                    | chr11             | 120459574    | 120460022  | -47                          |
| Lyst               | NM_010748                       | chr13             | 13682436     | 13682820   | -47                          |
| Ddx27              | NM_153065                       | chr2              | 166840582    | 166840948  | -47                          |
| Pask               | NM_080850                       | chr1              | 95239176     | 95239645   | -47                          |
| Cnot10             | NM_153585                       | chr9              | 114549113    | 114549614  | -47                          |
| AI413582           | NM_001002895                    | chr17             | 27702508     | 27702926   | -46                          |
| Ccp110             | NM_182995                       | chr7              | 125855917    | 125856240  | -46                          |
| Lsm10              | NM_138721                       | chr4              | 125773700    | 125774002  | -45                          |
| Rangap1            | NM_001146174                    | chr15             | 81560212     | 81560573   | -45                          |
| Dtymk              | NM_001105667                    | chr1              | 95698303     | 95698803   | -43                          |
| Nubp1              | NM_011955                       | chr16             | 10411767     | 10412207   | -43                          |
| Clcc1              | NM_145543                       | chr3              | 108456647    | 108456927  | -43                          |
| Cbx5               | NM_001076789                    | chr15             | 103070102    | 103070475  | -43                          |
| Atg4c              | NM_001145967                    | chr4              | 98860605     | 98860984   | -43                          |
| E2f3               | NM_010093                       | chr13             | 30077551     | 30078394   | -42                          |
| Topbp1             | NM_176979                       | chr9              | 103207404    | 103207825  | -42                          |
| BC049762           | NM_177567                       | chr11             | 51076361     | 51076625   | -41                          |
| Cpsf3l             | NM_028020                       | chr4              | 155243475    | 155243793  | -41                          |

**Supplemental Table 3. Significant ChIP-seq E2F3A promoter peaks  
(+/- 2kb from the TSS)**

| <b>Gene Symbol</b> | <b>Refseq<br/>Transcript ID</b> | <b>Chromosome</b> | <b>Start</b> | <b>End</b> | <b>distance<br/>from TSS</b> |
|--------------------|---------------------------------|-------------------|--------------|------------|------------------------------|
| 1190002N15Rik      | NM_001033145                    | chr9              | 94438395     | 94438685   | -41                          |
| Papd4              | NM_133905                       | chr13             | 93962089     | 93962466   | -41                          |
| Acin1              | NM_001085473                    | chr14             | 55305590     | 55306025   | -41                          |
| Smarcc1            | NM_009211                       | chr9              | 110034305    | 110034670  | -40                          |
| Smc2               | NM_008017                       | chr4              | 52451783     | 52452379   | -39                          |
| Mdm1               | NM_148922                       | chr10             | 117578611    | 117578996  | -39                          |
| Kcnab2             | NM_010598                       | chr4              | 151851548    | 151851841  | -38                          |
| Sh3gl1             | NM_013664                       | chr17             | 56175878     | 56176312   | -36                          |
| Prkci              | NM_008857                       | chr3              | 30894501     | 30894811   | -36                          |
| Mtmr3              | NM_028860                       | chr11             | 4494726      | 4494979    | -36                          |
| Rprd1b             | NM_001291135                    | chr2              | 157853838    | 157854555  | -36                          |
| Srsf1              | NM_001078167                    | chr11             | 87860629     | 87861049   | -35                          |
| Trub2              | NM_001290495                    | chr2              | 29643105     | 29643344   | -35                          |
| Mutyh              | NM_133250                       | chr4              | 116480159    | 116480448  | -35                          |
| Fanca              | NM_016925                       | chr8              | 125842411    | 125842607  | -34                          |
| 1700123M08Rik      | NR_040577                       | chr4              | 11893413     | 11893960   | -34                          |
| 2410006H16Rik      | NR_030738                       | chr11             | 62416044     | 62416648   | -32                          |
| Smek1              | NM_211355                       | chr12             | 102321824    | 102322062  | -32                          |
| Ltn1               | NM_001081068                    | chr16             | 87432708     | 87433056   | -32                          |
| Sgol1              | NM_028232                       | chr17             | 53828494     | 53828848   | -32                          |
| Bag4               | NM_026121                       | chr8              | 26895543     | 26895881   | -32                          |
| Ptrh2              | NM_001098810                    | chr11             | 86497265     | 86497836   | -32                          |
| Cops4              | NM_012001                       | chr5              | 100947107    | 100947484  | -32                          |
| Mns1               | NM_008613                       | chr9              | 72286012     | 72286595   | -32                          |
| Gadd45b            | NM_008655                       | chr10             | 80392566     | 80393042   | -31                          |
| Rif1               | NM_175238                       | chr2              | 51928205     | 51928445   | -31                          |
| Baz1b              | NM_011714                       | chr5              | 135662896    | 135663426  | -31                          |
| Zfp383             | NM_001243908                    | chr7              | 30693270     | 30693740   | -30                          |
| Crebzf             | NM_145151                       | chr7              | 97591119     | 97591401   | -30                          |
| Vars               | NM_011690                       | chr17             | 35137629     | 35138014   | -30                          |
| Rpusd2             | NM_173450                       | chr2              | 118860350    | 118860641  | -30                          |
| Isy1               | NM_133934                       | chr6              | 87788623     | 87788940   | -30                          |
| Limk2              | NM_010718                       | chr11             | 3309141      | 3309397    | -29                          |
| Acat1              | NM_144784                       | chr9              | 53418363     | 53418603   | -29                          |
| A630020A06         | NR_045740                       | chr15             | 3945718      | 3946302    | -28                          |
| AA465934           | NR_028363                       | chr11             | 83104984     | 83105361   | -28                          |
| Hist1h2ah          | NM_175659                       | chr13             | 22127443     | 22127634   | -28                          |
| Tradd              | NM_001033161                    | chr8              | 107788398    | 107788642  | -27                          |
| Apol7d             | NR_040308                       | chr1              | 71699664     | 71700099   | -27                          |
| Siva1              | NM_001161737                    | chr12             | 113882847    | 113883176  | -27                          |
| Gtse1              | NM_001168672                    | chr15             | 85689961     | 85690259   | -26                          |
| Fadd               | NM_010175                       | chr7              | 151768247    | 151768485  | -26                          |
| Osbp1a             | NM_207530                       | chr18             | 13100266     | 13100483   | -26                          |
| Gatc               | NM_029645                       | chr5              | 115791057    | 115791332  | -26                          |
| Arhgef1            | NM_001130152                    | chr7              | 25689194     | 25689483   | -26                          |
| Lipt2              | NM_026010                       | chr7              | 107307595    | 107307926  | -26                          |
| Zc3h18             | NM_001029994                    | chr8              | 124900380    | 124900599  | -26                          |

**Supplemental Table 3. Significant ChIP-seq E2F3A promoter peaks  
(+/- 2kb from the TSS)**

| <b>Gene Symbol</b> | <b>Refseq<br/>Transcript ID</b> | <b>Chromosome</b> | <b>Start</b> | <b>End</b> | <b>distance<br/>from TSS</b> |
|--------------------|---------------------------------|-------------------|--------------|------------|------------------------------|
| Mtch1              | NM_019880                       | chr17             | 29484648     | 29485097   | -25                          |
| Ssna1              | NM_023464                       | chr2              | 25127830     | 25128091   | -24                          |
| Med14              | NM_001048208                    | chrX              | 12338830     | 12339413   | -24                          |
| Spag5              | NM_017407                       | chr11             | 78114957     | 78115181   | -23                          |
| Rrm2               | NM_009104                       | chr12             | 25392881     | 25393309   | -23                          |
| Wrap53             | NM_144824                       | chr11             | 69392706     | 69392989   | -23                          |
| Zcwpw1             | NM_001005426                    | chr5              | 138228846    | 138229167  | -23                          |
| Rab11fip1          | NM_029423                       | chr8              | 28284980     | 28285298   | -22                          |
| Cpd                | NM_007754                       | chr11             | 76660327     | 76660734   | -22                          |
| Zfp689             | NM_175163                       | chr7              | 134592478    | 134592907  | -22                          |
| Eif4a2             | NM_001123038                    | chr16             | 23107354     | 23107684   | -21                          |
| Snx27              | NM_001082484                    | chr3              | 94386547     | 94386769   | -21                          |
| Ddx39b             | NM_019693                       | chr17             | 35378485     | 35378854   | -21                          |
| Rad54b             | NM_001039556                    | chr4              | 11485877     | 11486214   | -21                          |
| 1600002H07Rik      | NM_028056                       | chr17             | 24357549     | 24357916   | -20                          |
| Nrm                | NM_134122                       | chr17             | 35998144     | 35998341   | -20                          |
| Polg               | NM_017462                       | chr7              | 86611042     | 86611313   | -20                          |
| Rabl3              | NM_001042499                    | chr16             | 37539780     | 37540142   | -18                          |
| Trappc5            | NM_025701                       | chr8              | 3676301      | 3676615    | -18                          |
| Smim8              | NM_025471                       | chr4              | 34725412     | 34725793   | -18                          |
| Fhl2               | NM_010212                       | chr1              | 43220664     | 43220980   | -17                          |
| Cipc               | NM_001289432                    | chr12             | 88288135     | 88288415   | -17                          |
| Mms22l             | NM_199467                       | chr4              | 24423399     | 24423783   | -17                          |
| Ccdc15             | NM_001081429                    | chr9              | 37155713     | 37156273   | -17                          |
| Ankrd32            | NM_134071                       | chr13             | 77274646     | 77274843   | -17                          |
| Hat1               | NM_026115                       | chr2              | 71227106     | 71227493   | -17                          |
| Clspn              | NM_175554                       | chr4              | 126234017    | 126234396  | -17                          |
| Polh               | NM_030715                       | chr17             | 46339468     | 46339710   | -16                          |
| Csrp2              | NM_007792                       | chr10             | 110356949    | 110357482  | -16                          |
| Dnph1              | NM_207161                       | chr17             | 46633594     | 46633849   | -16                          |
| Zfp526             | NM_175436                       | chr7              | 26006270     | 26006638   | -15                          |
| Gins2              | NM_178856                       | chr8              | 123112909    | 123113069  | -15                          |
| Rpsa               | NM_011029                       | chr9              | 120036676    | 120037060  | -15                          |
| Smc6               | NM_025695                       | chr12             | 11272555     | 11272798   | -15                          |
| Tex261             | NM_009357                       | chr6              | 83725647     | 83725992   | -15                          |
| Drosha             | NM_026799                       | chr15             | 12754298     | 12754813   | -14                          |
| Nsl1               | NM_198654                       | chr1              | 192886740    | 192887032  | -13                          |
| Mtrr               | NM_172480                       | chr13             | 68720814     | 68721206   | -13                          |
| Rnf168             | NM_027355                       | chr16             | 32277188     | 32277878   | -13                          |
| Mbd4               | NM_010774                       | chr6              | 115803168    | 115803574  | -13                          |
| Rnf38              | NM_175201                       | chr4              | 44180235     | 44180608   | -13                          |
| Hn1l               | NM_198937                       | chr17             | 25097302     | 25097856   | -12                          |
| Calu               | NM_184053                       | chr6              | 29297868     | 29298319   | -12                          |
| Rad51              | NM_011234                       | chr2              | 118938327    | 118938755  | -11                          |
| Use1               | NM_001145780                    | chr8              | 73890586     | 73890884   | -11                          |
| Pola1              | NM_008892                       | chrX              | 90877214     | 90877793   | -11                          |
| Zfp41              | NM_001044718                    | chr15             | 75446920     | 75447286   | -10                          |

**Supplemental Table 3. Significant ChIP-seq E2F3A promoter peaks  
(+/- 2kb from the TSS)**

| <b>Gene Symbol</b> | <b>Refseq<br/>Transcript ID</b> | <b>Chromosome</b> | <b>Start</b> | <b>End</b> | <b>distance<br/>from TSS</b> |
|--------------------|---------------------------------|-------------------|--------------|------------|------------------------------|
| Tfeb               | NM_001161722                    | chr17             | 47873815     | 47874135   | -10                          |
| Ctnnb1             | NM_025680                       | chr2              | 157562982    | 157563270  | -10                          |
| 6330408A02Rik      | NM_177312                       | chr7              | 13863848     | 13864310   | -10                          |
| Tbc1d15            | NM_025706                       | chr10             | 114688394    | 114688719  | -9                           |
| Tmem194b           | NM_001142647                    | chr1              | 52687369     | 52687711   | -8                           |
| Birc5              | NM_001012273                    | chr11             | 117710408    | 117710676  | -8                           |
| Haus4              | NM_145462                       | chr14             | 55173076     | 55173334   | -8                           |
| Rrm1               | NM_009103                       | chr7              | 109589952    | 109590448  | -8                           |
| Top2a              | NM_011623                       | chr11             | 98885369     | 98885650   | -8                           |
| Hist1h2ad          | NM_178188                       | chr13             | 23666080     | 23666403   | -8                           |
| Usp1               | NM_146144                       | chr4              | 98590215     | 98590770   | -8                           |
| Polr2a             | NM_001291068                    | chr11             | 69571944     | 69572338   | -7                           |
| Adprhl2            | NM_133883                       | chr4              | 125998734    | 125999172  | -7                           |
| Ube2g2             | NM_019803                       | chr10             | 77084832     | 77085285   | -7                           |
| Cntln              | NM_175275                       | chr4              | 84530024     | 84530389   | -6                           |
| Haus6              | NM_173400                       | chr4              | 86257826     | 86258035   | -6                           |
| Cdt1               | NM_026014                       | chr8              | 125091558    | 125092259  | -6                           |
| Ppm1g              | NM_008014                       | chr5              | 31522644     | 31523200   | -5                           |
| Nav2               | NM_175272                       | chr7              | 56501400     | 56501706   | -5                           |
| Nsmce1             | NM_026330                       | chr7              | 132634950    | 132635170  | -5                           |
| Rad51c             | NM_053269                       | chr11             | 87217764     | 87218237   | -5                           |
| Dlgap4             | NM_001042488                    | chr2              | 156546543    | 156546848  | -5                           |
| Ap4m1              | NM_021392                       | chr5              | 138613061    | 138613426  | -5                           |
| Usp39              | NM_138592                       | chr6              | 72295065     | 72295280   | -5                           |
| Mcm3               | NM_008563                       | chr1              | 20810115     | 20810479   | -4                           |
| 1700001G17Rik      | NR_033199                       | chr1              | 33726557     | 33726771   | -4                           |
| 0610009B22Rik      | NM_025319                       | chr11             | 51501960     | 51502318   | -4                           |
| Nbn                | NM_013752                       | chr4              | 15884957     | 15885261   | -4                           |
| Dis3               | NM_028315                       | chr14             | 99498818     | 99499165   | -4                           |
| Arl6ip6            | NM_022989                       | chr2              | 53050748     | 53051481   | -3                           |
| Shcbp1             | NM_011369                       | chr8              | 4779405      | 4779666    | -3                           |
| Tfrc               | NM_011638                       | chr16             | 32608773     | 32609185   | -2                           |
| Mrpl49             | NM_026246                       | chr19             | 6057638      | 6057865    | -2                           |
| Saal1              | NM_030233                       | chr7              | 53965891     | 53966152   | -2                           |
| BC004004           | NM_030561                       | chr17             | 29405565     | 29405897   | -1                           |
| Mrps18c            | NM_026826                       | chr5              | 101227558    | 101227995  | -1                           |
| Gab1               | NM_021356                       | chr8              | 83403984     | 83404771   | -1                           |
| Dlc1               | NM_015802                       | chr8              | 37676731     | 37677258   | 2                            |
| Map1a              | NM_032393                       | chr2              | 121115136    | 121115542  | 2                            |
| Dhx9               | NM_007842                       | chr1              | 155334590    | 155334983  | 3                            |
| Ercc6l             | NM_146235                       | chrX              | 99352278     | 99352575   | 3                            |
| Atf3               | NM_146091                       | chr19             | 7568742      | 7569118    | 3                            |
| Rfc3               | NM_027009                       | chr5              | 152453639    | 152453919  | 3                            |
| Smpd4              | NM_001164610                    | chr16             | 17619355     | 17619544   | 4                            |
| Dnajc5             | NM_016775                       | chr2              | 181254976    | 181255409  | 4                            |
| Ppp1r18            | NM_175242                       | chr17             | 36003392     | 36003734   | 4                            |
| Txn1l              | NM_016792                       | chr18             | 63851834     | 63852182   | 4                            |

**Supplemental Table 3. Significant ChIP-seq E2F3A promoter peaks  
(+/- 2kb from the TSS)**

| <b>Gene Symbol</b> | <b>Refseq<br/>Transcript ID</b> | <b>Chromosome</b> | <b>Start</b> | <b>End</b> | <b>distance<br/>from TSS</b> |
|--------------------|---------------------------------|-------------------|--------------|------------|------------------------------|
| Fsd1l              | NM_001195284                    | chr4              | 53644218     | 53644474   | 4                            |
| Brca2              | NM_009765                       | chr5              | 151325066    | 151325332  | 4                            |
| Fen1               | NM_007999                       | chr19             | 10278277     | 10278578   | 5                            |
| Them4              | NM_029431                       | chr3              | 94113916     | 94114200   | 5                            |
| Rabl6              | NM_001024616                    | chr2              | 25463811     | 25464108   | 6                            |
| Cdk2               | NM_016756                       | chr10             | 128141829    | 128142371  | 6                            |
| Prdm4              | NM_181650                       | chr10             | 85379550     | 85379815   | 7                            |
| Ppif               | NM_134084                       | chr14             | 26513508     | 26513815   | 7                            |
| Med9               | NM_138675                       | chr11             | 59761530     | 59761915   | 8                            |
| Cdc42              | NM_009861                       | chr4              | 136913498    | 136913832  | 8                            |
| Lmf2               | NM_178919                       | chr15             | 89185881     | 89186280   | 9                            |
| Eif4b              | NM_145625                       | chr15             | 101904036    | 101904387  | 9                            |
| Ccdc167            | NM_001163741                    | chr17             | 29853772     | 29854133   | 9                            |
| Tubg1              | NM_134024                       | chr11             | 100981228    | 100981678  | 9                            |
| Magoh              | NM_001282737                    | chr4              | 107552223    | 107552514  | 10                           |
| Rab23              | NM_008999                       | chr1              | 33776583     | 33776918   | 11                           |
| Mcm5               | NM_008566                       | chr8              | 77633154     | 77633719   | 11                           |
| Cdk4               | NM_009870                       | chr10             | 126500442    | 126500896  | 11                           |
| Dxo                | NM_001163770                    | chr17             | 34973807     | 34974142   | 12                           |
| Pagr1a             | NM_030240                       | chr7              | 134160751    | 134160955  | 12                           |
| Haus8              | NM_029621                       | chr8              | 73796300     | 73796652   | 12                           |
| Rpa1               | NM_001164223                    | chr11             | 75161629     | 75162114   | 13                           |
| Smc1a              | NM_019710                       | chrX              | 148450866    | 148451099  | 13                           |
| Cops3              | NM_011991                       | chr11             | 59653076     | 59653434   | 13                           |
| Ppp1r18            | NM_001146710                    | chr17             | 36002827     | 36003343   | 13                           |
| Srsf7              | NM_146083                       | chr17             | 80606434     | 80606828   | 13                           |
| Cdca5              | NM_026410                       | chr19             | 6084992      | 6085226    | 13                           |
| Alms1              | NM_145223                       | chr6              | 85537300     | 85537777   | 15                           |
| Polr3c             | NM_028925                       | chr3              | 96531168     | 96531524   | 15                           |
| Cdca3              | NM_013538                       | chr6              | 124780071    | 124780346  | 16                           |
| Gnl2               | NM_145552                       | chr4              | 124707153    | 124707393  | 16                           |
| Inip               | NM_001013577                    | chr4              | 59796391     | 59797028   | 17                           |
| Cd2bp2             | NM_001285905                    | chr7              | 134339307    | 134339839  | 17                           |
| 5830418K08Rik      | NM_176976                       | chr9              | 15162126     | 15162302   | 17                           |
| Trip13             | NM_027182                       | chr13             | 74075092     | 74075301   | 18                           |
| Pbk                | NM_023209                       | chr14             | 66424556     | 66424973   | 18                           |
| Dscr3              | NM_007834                       | chr16             | 94747990     | 94748445   | 18                           |
| Depdc1b            | NM_178683                       | chr13             | 109106367    | 109106731  | 19                           |
| Commd10            | NM_178377                       | chr18             | 47118414     | 47118682   | 19                           |
| Zfp212             | NM_001145881                    | chr6              | 47870449     | 47870721   | 19                           |
| Pkm                | NM_001253883                    | chr9              | 59504055     | 59504333   | 20                           |
| Stag3              | NM_016964                       | chr5              | 138721586    | 138721927  | 21                           |
| 4930483J18Rik      | NR_015603                       | chr15             | 81021125     | 81021481   | 21                           |
| Cad                | NM_023525                       | chr5              | 31356990     | 31357356   | 21                           |
| Spc24              | NM_026282                       | chr9              | 21564498     | 21564918   | 21                           |
| Nuf2               | NM_023284                       | chr1              | 171461432    | 171461713  | 22                           |
| Shmt1              | NM_009171                       | chr11             | 60624519     | 60624968   | 23                           |

**Supplemental Table 3. Significant ChIP-seq E2F3A promoter peaks  
(+/- 2kb from the TSS)**

| <b>Gene Symbol</b> | <b>Refseq<br/>Transcript ID</b> | <b>Chromosome</b> | <b>Start</b> | <b>End</b> | <b>distance<br/>from TSS</b> |
|--------------------|---------------------------------|-------------------|--------------|------------|------------------------------|
| Polr1e             | NM_001285800                    | chr4              | 45031380     | 45031625   | 23                           |
| Snai2              | NM_011415                       | chr16             | 14705854     | 14706097   | 25                           |
| Ppip5k2            | NM_173760                       | chr1              | 99666479     | 99666807   | 25                           |
| Uba2               | NM_016682                       | chr7              | 34953250     | 34953794   | 25                           |
| Pafah1b2           | NM_008775                       | chr9              | 45792775     | 45793081   | 25                           |
| Recql4             | NM_058214                       | chr15             | 76540675     | 76541250   | 26                           |
| Nfxl1              | NM_133921                       | chr5              | 72950548     | 72951167   | 26                           |
| Rad51ap1           | NM_009013                       | chr6              | 126889362    | 126889731  | 26                           |
| 2700029M09Rik      | NM_028299                       | chr8              | 63369042     | 63369504   | 26                           |
| Skp2               | NM_013787                       | chr15             | 9069974      | 9070391    | 27                           |
| Cav2               | NM_016900                       | chr6              | 17231059     | 17231362   | 27                           |
| Mocs1              | NM_028464                       | chr17             | 49567614     | 49567816   | 27                           |
| C130036L24Rik      | NR_015507                       | chr1              | 88256017     | 88256334   | 28                           |
| Ccdc62             | NM_001134767                    | chr5              | 124380505    | 124380944  | 28                           |
| Med23              | NM_027347                       | chr10             | 24589564     | 24590074   | 28                           |
| Dnajc8             | NM_172400                       | chr4              | 132091303    | 132091699  | 28                           |
| Dbr1               | NM_031403                       | chr9              | 99476054     | 99476437   | 29                           |
| Anapc13            | NM_181394                       | chr9              | 102528469    | 102528838  | 29                           |
| Fkbp1a             | NM_008019                       | chr2              | 151368093    | 151368433  | 29                           |
| Esco2              | NM_028039                       | chr14             | 66452504     | 66453046   | 30                           |
| 2500004C02Rik      | NR_040318                       | chr2              | 153171304    | 153171726  | 30                           |
| Tpk1               | NM_013861                       | chr6              | 43615944     | 43616341   | 31                           |
| Gm17769            | NR_027377                       | chr10             | 76881048     | 76881254   | 31                           |
| Rbm6               | NM_029169                       | chr9              | 107774950    | 107775286  | 31                           |
| Kif15              | NM_010620                       | chr9              | 122860046    | 122860412  | 31                           |
| Szt2               | NM_198170                       | chr4              | 118081671    | 118082000  | 32                           |
| Uhrf1              | NM_001111079                    | chr17             | 56442617     | 56442965   | 32                           |
| Sfpq               | NR_045010                       | chr4              | 126698388    | 126698764  | 32                           |
| Ahi1               | NM_026203                       | chr10             | 20672161     | 20672608   | 33                           |
| L3mbtl2            | NM_145993                       | chr15             | 81494162     | 81494539   | 33                           |
| Zbtb11             | NM_173026                       | chr16             | 55973762     | 55974136   | 33                           |
| Rad21              | NM_009009                       | chr15             | 51823133     | 51823407   | 35                           |
| Mllt3              | NM_027326                       | chr4              | 87679106     | 87679442   | 36                           |
| Snrpb              | NM_009225                       | chr2              | 130004929    | 130005196  | 37                           |
| Tmem80             | NM_001141950                    | chr7              | 148513922    | 148514207  | 37                           |
| Slc2a1             | NM_011400                       | chr4              | 118781107    | 118781665  | 37                           |
| Spcs3              | NM_029701                       | chr8              | 55615148     | 55615477   | 38                           |
| Rqcd1              | NM_021383                       | chr1              | 74552271     | 74553073   | 39                           |
| Gabpb2             | NM_172512                       | chr3              | 95021625     | 95022023   | 39                           |
| 4933433G15Rik      | NR_040719                       | chr9              | 75257841     | 75258217   | 39                           |
| Rad54l             | NM_001122958                    | chr4              | 115796075    | 115796432  | 40                           |
| Mgme1              | NM_028984                       | chr2              | 144096509    | 144096850  | 41                           |
| Ehd4               | NM_133838                       | chr2              | 119980163    | 119980373  | 42                           |
| Nfkbiz             | NM_001159394                    | chr16             | 55822041     | 55822373   | 43                           |
| Slc29a1            | NM_001199116                    | chr17             | 45732376     | 45732577   | 44                           |
| H2afz              | NM_016750                       | chr3              | 137527356    | 137527631  | 44                           |
| Mis12              | NM_025993                       | chr11             | 70832946     | 70833369   | 46                           |

**Supplemental Table 3. Significant ChIP-seq E2F3A promoter peaks  
(+/- 2kb from the TSS)**

| <b>Gene Symbol</b> | <b>Refseq<br/>Transcript ID</b> | <b>Chromosome</b> | <b>Start</b> | <b>End</b> | <b>distance<br/>from TSS</b> |
|--------------------|---------------------------------|-------------------|--------------|------------|------------------------------|
| Nudc               | NM_010948                       | chr4              | 133101668    | 133102123  | 46                           |
| Hnrnpa2b1          | NM_016806                       | chr6              | 51419639     | 51420054   | 46                           |
| Gm4890             | NR_045823                       | chr8              | 81818627     | 81819417   | 46                           |
| Enkd1              | NM_198299                       | chr8              | 108231855    | 108232187  | 46                           |
| Dnajc9             | NM_134081                       | chr14             | 21207974     | 21208194   | 47                           |
| Mthfd2             | NM_008638                       | chr6              | 83267429     | 83267671   | 47                           |
| Dnase2a            | NM_010062                       | chr8              | 87432353     | 87432785   | 47                           |
| Tonsl              | NM_183091                       | chr15             | 76470128     | 76470492   | 48                           |
| Mdc1               | NM_001010833                    | chr17             | 35978012     | 35978968   | 48                           |
| Gpr19              | NM_001167700                    | chr6              | 134847755    | 134848032  | 49                           |
| Rfesd              | NM_001131069                    | chr13             | 76155963     | 76156256   | 50                           |
| Rpgrip1l           | NM_173431                       | chr8              | 93836863     | 93837278   | 50                           |
| Ddx20              | NM_017397                       | chr3              | 105490247    | 105490628  | 51                           |
| Ipo9               | NM_153774                       | chr1              | 137326834    | 137327198  | 51                           |
| Abcf2              | NM_001190443                    | chr5              | 24083023     | 24083443   | 51                           |
| Myg1               | NM_021713                       | chr15             | 102162033    | 102162348  | 52                           |
| Primpol            | NM_001001184                    | chr8              | 47702339     | 47702662   | 53                           |
| 2810417H13Rik      | NM_026515                       | chr9              | 65737984     | 65738379   | 53                           |
| Atad5              | NM_001029856                    | chr11             | 79902816     | 79903092   | 53                           |
| 2310036O22Rik      | NM_026760                       | chr8              | 87550573     | 87550995   | 53                           |
| Pde12              | NM_178668                       | chr14             | 27489142     | 27489412   | 54                           |
| Gm5617             | NM_001004191                    | chr9              | 48303393     | 48303609   | 54                           |
| Tipin              | NM_025372                       | chr9              | 64129194     | 64129741   | 55                           |
| Melk               | NM_010790                       | chr4              | 44313606     | 44314080   | 55                           |
| Pola2              | NM_008893                       | chr19             | 5963935      | 5964364    | 56                           |
| Cherp              | NM_138585                       | chr8              | 74998801     | 74999345   | 58                           |
| Brca1              | NM_009764                       | chr11             | 101413056    | 101413363  | 59                           |
| A730008H23Rik      | NM_172505                       | chr1              | 90173816     | 90174328   | 59                           |
| Nkap               | NM_025937                       | chrX              | 34666701     | 34666932   | 60                           |
| Cep250             | NM_001130000                    | chr2              | 155782134    | 155782573  | 61                           |
| Ankle1             | NM_172756                       | chr8              | 73929763     | 73930178   | 61                           |
| Naa40              | NM_027643                       | chr19             | 7315541      | 7315759    | 61                           |
| Med18              | NM_026039                       | chr4              | 132019534    | 132020014  | 61                           |
| Scpep1             | NM_029023                       | chr11             | 88816526     | 88816861   | 62                           |
| Kif2c              | NM_134471                       | chr4              | 116854988    | 116855344  | 62                           |
| Pomt2              | NM_153415                       | chr12             | 88488625     | 88488950   | 64                           |
| Ssbp1              | NM_001286664                    | chr6              | 40421331     | 40421735   | 67                           |
| Ssrp1              | NM_182990                       | chr2              | 84877200     | 84877488   | 68                           |
| Nup155             | NM_133227                       | chr15             | 8059242      | 8059519    | 69                           |
| Glt25d1            | NM_146211                       | chr8              | 74134889     | 74135094   | 70                           |
| Rnaseh2b           | NM_026001                       | chr14             | 62950717     | 62951305   | 70                           |
| E2f1               | NM_007891                       | chr2              | 154395306    | 154395808  | 70                           |
| Dek                | NM_025900                       | chr13             | 47201404     | 47201631   | 71                           |
| Rassf1             | NM_019713                       | chr9              | 107456806    | 107457161  | 71                           |
| Pold3              | NM_133692                       | chr7              | 107269602    | 107270274  | 71                           |
| Cox7a2             | NM_009945                       | chr9              | 79607485     | 79607686   | 74                           |
| Apitd1             | NM_027263                       | chr4              | 148511438    | 148511830  | 74                           |



**Supplemental Table 3. Significant ChIP-seq E2F3A promoter peaks  
(+/- 2kb from the TSS)**

| <b>Gene Symbol</b> | <b>Refseq<br/>Transcript ID</b> | <b>Chromosome</b> | <b>Start</b> | <b>End</b> | <b>distance<br/>from TSS</b> |
|--------------------|---------------------------------|-------------------|--------------|------------|------------------------------|
| Paics              | NM_025939                       | chr5              | 77380130     | 77380889   | 75                           |
| Spa17              | NM_011449                       | chr9              | 37421086     | 37421373   | 75                           |
| Nudt3              | NM_019837                       | chr17             | 27760152     | 27760486   | 77                           |
| Chek1              | NM_007691                       | chr9              | 36533885     | 36534442   | 79                           |
| E130307A14Rik      | NR_038037                       | chr10             | 39451627     | 39451838   | 80                           |
| Umps               | NM_009471                       | chr16             | 33966709     | 33967308   | 80                           |
| lpp                | NM_008389                       | chr4              | 116180006    | 116180461  | 81                           |
| Neil3              | NM_146208                       | chr8              | 54724183     | 54724489   | 82                           |
| Rnf219             | NM_026047                       | chr14             | 104921617    | 104921980  | 84                           |
| Cotl1              | NM_028071                       | chr8              | 122364251    | 122364537  | 84                           |
| Nxf1               | NM_001276704                    | chr19             | 8831516      | 8831867    | 86                           |
| Cdc7               | NM_001271568                    | chr5              | 107393203    | 107393648  | 86                           |
| Dlx1               | NM_010053                       | chr2              | 71367361     | 71367814   | 87                           |
| Sp4                | NM_009239                       | chr12             | 119539683    | 119539963  | 89                           |
| Mtbp               | NM_134092                       | chr15             | 55388703     | 55389399   | 89                           |
| Cmc1               | NM_026442                       | chr9              | 118058975    | 118059472  | 90                           |
| Rfc2               | NM_020022                       | chr5              | 135058513    | 135058790  | 93                           |
| Rmi1               | NM_028904                       | chr13             | 58503877     | 58504224   | 94                           |
| Gm20554            | NR_030701                       | chr13             | 72765762     | 72766071   | 95                           |
| Zfp62              | NM_009562                       | chr11             | 49016869     | 49017326   | 97                           |
| Xrcc6              | NM_010247                       | chr15             | 81846667     | 81847122   | 97                           |
| Sept10             | NM_001024910                    | chr10             | 58684205     | 58684786   | 99                           |
| Cactin             | NM_027381                       | chr10             | 80783711     | 80784180   | 99                           |
| Tmed3              | NM_025360                       | chr9              | 89599597     | 89599966   | 99                           |
| Tubb5              | NM_011655                       | chr17             | 35974971     | 35975320   | 100                          |
| Zdhhc1             | NM_175160                       | chr8              | 108020505    | 108020833  | 100                          |
| Cdc5l              | NM_152810                       | chr17             | 45570417     | 45570688   | 103                          |
| Ttc32              | NM_029321                       | chr12             | 9036709      | 9037101    | 103                          |
| Dlgap5             | NM_144553                       | chr14             | 48037810     | 48038146   | 103                          |
| Rfc4               | NM_145480                       | chr16             | 23127436     | 23127962   | 103                          |
| Wdr76              | NM_001290986                    | chr2              | 121332381    | 121332741  | 103                          |
| 5830415F09Rik      | NM_029086                       | chr4              | 46402001     | 46402374   | 107                          |
| Myl12a             | NM_026064                       | chr17             | 71351586     | 71351942   | 108                          |
| Pmf1               | NM_025928                       | chr3              | 88213983     | 88214271   | 110                          |
| Mnd1               | NM_029797                       | chr3              | 83959407     | 83959782   | 113                          |
| Tube1              | NM_028006                       | chr10             | 38853732     | 38854152   | 114                          |
| Ctc1               | NM_001143790                    | chr11             | 68829365     | 68829688   | 115                          |
| Rad54l2            | NM_030730                       | chr9              | 106691260    | 106691597  | 115                          |
| Wdyhv1             | NM_029734                       | chr15             | 57972870     | 57973342   | 116                          |
| Cdkl2              | NM_177270                       | chr5              | 92471703     | 92472198   | 117                          |
| Tmem209            | NM_178625                       | chr6              | 30459285     | 30459892   | 117                          |
| Mcm10              | NM_027290                       | chr2              | 4933529      | 4933905    | 119                          |
| Dut                | NM_023595                       | chr2              | 125073196    | 125073546  | 121                          |
| Mcm8               | NM_025676                       | chr2              | 132641863    | 132642134  | 123                          |
| Pim3               | NM_145478                       | chr15             | 88692497     | 88692995   | 123                          |
| Nsmce2             | NM_026746                       | chr15             | 59205696     | 59206056   | 124                          |
| Aaas               | NM_153416                       | chr15             | 102180868    | 102181262  | 124                          |

**Supplemental Table 3. Significant ChIP-seq E2F3A promoter peaks  
(+/- 2kb from the TSS)**

| <b>Gene Symbol</b> | <b>Refseq<br/>Transcript ID</b> | <b>Chromosome</b> | <b>Start</b> | <b>End</b> | <b>distance<br/>from TSS</b> |
|--------------------|---------------------------------|-------------------|--------------|------------|------------------------------|
| Nufip1             | NM_013745                       | chr14             | 76510624     | 76511022   | 126                          |
| Snrpc              | NM_011432                       | chr17             | 27976963     | 27977351   | 126                          |
| Tardbp             | NM_001008546                    | chr4              | 148000818    | 148001130  | 130                          |
| Xylb               | NM_001033209                    | chr9              | 119266434    | 119266830  | 134                          |
| Gfer               | NM_023040                       | chr17             | 24832793     | 24833130   | 139                          |
| U2surp             | NM_026476                       | chr9              | 95412059     | 95412491   | 139                          |
| Eri1               | NM_026067                       | chr8              | 36557999     | 36558884   | 145                          |
| Spn-ps             | NR_033583                       | chr15             | 90728611     | 90728902   | 150                          |
| Dck                | NM_007832                       | chr5              | 89194004     | 89194376   | 153                          |
| Mcm2               | NM_008564                       | chr6              | 88848417     | 88848823   | 153                          |
| Sec24b             | NM_207209                       | chr3              | 129763575    | 129763766  | 154                          |
| Kxd1               | NM_029366                       | chr8              | 73046670     | 73047168   | 159                          |
| Tmem30a            | NM_133718                       | chr9              | 79640905     | 79641242   | 163                          |
| Tfb1m              | NM_146074                       | chr17             | 3557329      | 3557769    | 163                          |
| Ccdc138            | NM_001162956                    | chr10             | 57960663     | 57961036   | 166                          |
| 1700028E10Rik      | NR_045700                       | chr5              | 152171113    | 152171716  | 166                          |
| lffg1              | NM_028007                       | chr8              | 88364482     | 88364879   | 167                          |
| Ints3              | NM_145540                       | chr3              | 90237197     | 90237581   | 168                          |
| ltpa               | NM_025922                       | chr2              | 130493624    | 130493869  | 171                          |
| Slbp               | NM_001289724                    | chr5              | 33994716     | 33995387   | 171                          |
| Senp1              | NM_144851                       | chr15             | 97923570     | 97924086   | 171                          |
| Paxip1             | NM_018878                       | chr5              | 28117713     | 28118122   | 172                          |
| Csrp2bp            | NM_181417                       | chr2              | 144194773    | 144195114  | 174                          |
| Myh9               | NM_022410                       | chr15             | 77672253     | 77672598   | 179                          |
| Cdipt              | NM_026638                       | chr7              | 134119507    | 134119708  | 181                          |
| Rsbn1              | NM_172684                       | chr3              | 103718043    | 103718404  | 182                          |
| Rtca               | NM_025517                       | chr3              | 116210729    | 116211091  | 182                          |
| Arhgap31           | NM_020260                       | chr16             | 38712785     | 38713126   | 192                          |
| Gucd1              | NM_175133                       | chr10             | 74979724     | 74980022   | 193                          |
| Trim27             | NM_009054                       | chr13             | 21271827     | 21272179   | 204                          |
| Acat2              | NM_009338                       | chr17             | 13153155     | 13153611   | 207                          |
| Rrp1b              | NM_028244                       | chr17             | 32173183     | 32173445   | 208                          |
| Siah2              | NM_009174                       | chr3              | 58495930     | 58496270   | 209                          |
| Myc                | NM_001177353                    | chr15             | 61816956     | 61817260   | 213                          |
| Mcm6               | NM_008567                       | chr1              | 130255842    | 130256190  | 216                          |
| 4930451G09Rik      | NR_073370                       | chr16             | 4964385      | 4964812    | 218                          |
| Mms19              | NM_028152                       | chr19             | 42055180     | 42055620   | 225                          |
| Rab33b             | NM_016858                       | chr3              | 51287926     | 51288301   | 227                          |
| Cdca2              | NM_001110162                    | chr14             | 68333316     | 68333558   | 229                          |
| Raf1               | NM_029780                       | chr6              | 115626259    | 115626585  | 230                          |
| Zscan21            | NM_011757                       | chr5              | 138558192    | 138558535  | 232                          |
| Chrac1             | NM_053068                       | chr15             | 72920903     | 72921243   | 232                          |
| Oard1              | NM_207219                       | chr17             | 48549400     | 48549719   | 236                          |
| Upp1               | NM_001159402                    | chr11             | 9018654      | 9018841    | 239                          |
| Lipg               | NM_010720                       | chr18             | 75120470     | 75120869   | 247                          |
| Tm9sf1             | NM_028780                       | chr14             | 56262232     | 56262551   | 251                          |
| Ptbp1              | NM_008956                       | chr10             | 79317224     | 79317630   | 251                          |

**Supplemental Table 3. Significant ChIP-seq E2F3A promoter peaks  
(+/- 2kb from the TSS)**

| <b>Gene Symbol</b> | <b>Refseq<br/>Transcript ID</b> | <b>Chromosome</b> | <b>Start</b> | <b>End</b> | <b>distance<br/>from TSS</b> |
|--------------------|---------------------------------|-------------------|--------------|------------|------------------------------|
| Tead4              | NM_011567                       | chr6              | 128250388    | 128250768  | 252                          |
| Timeless           | NM_001136082                    | chr10             | 127669188    | 127669568  | 260                          |
| Nol12              | NM_133800                       | chr15             | 78765399     | 78765847   | 261                          |
| Actb               | NM_007393                       | chr5              | 143667983    | 143668273  | 274                          |
| Get4               | NM_026269                       | chr5              | 139728430    | 139728673  | 275                          |
| Zfp628             | NM_170759                       | chr7              | 4866982      | 4867207    | 277                          |
| Gar1               | NM_026578                       | chr3              | 129533868    | 129534187  | 286                          |
| Bloc1s1            | NM_015740                       | chr10             | 128360083    | 128360503  | 286                          |
| Zfat               | NM_198644                       | chr15             | 68089885     | 68090372   | 289                          |
| Tcof1              | NM_011552                       | chr18             | 61008139     | 61008514   | 291                          |
| Orc6               | NM_019716                       | chr8              | 87823711     | 87823934   | 293                          |
| 2610015P09Rik      | NM_027801                       | chr16             | 43890131     | 43890484   | 294                          |
| Pycl1              | NM_025412                       | chr15             | 75751529     | 75751857   | 296                          |
| Unk                | NM_172569                       | chr11             | 115891686    | 115892165  | 297                          |
| Slc20a1            | NM_015747                       | chr2              | 129024636    | 129024990  | 305                          |
| Ints7              | NM_178632                       | chr1              | 193399760    | 193400080  | 308                          |
| Dusp1              | NM_013642                       | chr17             | 26644842     | 26645351   | 320                          |
| Plcb1              | NM_019677                       | chr2              | 134612072    | 134612369  | 322                          |
| Ibtk               | NM_001081282                    | chr9              | 85642461     | 85642774   | 323                          |
| Gtf3c5             | NM_001290484                    | chr2              | 28438223     | 28438716   | 329                          |
| Gmnn               | NM_020567                       | chr13             | 24853208     | 24853731   | 336                          |
| Anapc5             | NM_001042491                    | chr5              | 123270852    | 123271173  | 338                          |
| Pfkm               | NM_001163488                    | chr15             | 97923231     | 97923483   | 338                          |
| 1700021K19Rik      | NM_172615                       | chr16             | 32867965     | 32868258   | 340                          |
| Tuba1b             | NM_011654                       | chr15             | 98764287     | 98764670   | 342                          |
| Tacc3              | NM_001040435                    | chr5              | 34001011     | 34001275   | 348                          |
| Cln8               | NM_012000                       | chr8              | 14888749     | 14889035   | 357                          |
| Tfam               | NM_009360                       | chr10             | 70700251     | 70700594   | 369                          |
| Ahcy               | NM_016661                       | chr2              | 154899749    | 154899973  | 371                          |
| Lrrc8a             | NM_177725                       | chr2              | 30093491     | 30093828   | 372                          |
| Phf20              | NM_172674                       | chr2              | 156022595    | 156022922  | 377                          |
| G3bp1              | NM_013716                       | chr11             | 55283434     | 55283835   | 382                          |
| Hirip3             | NM_172746                       | chr7              | 134005682    | 134006051  | 382                          |
| Zdhhc6             | NM_025883                       | chr19             | 55390016     | 55390260   | 383                          |
| Pank2              | NM_153501                       | chr2              | 131088408    | 131088828  | 383                          |
| Vps72              | NM_009336                       | chr3              | 94915253     | 94915445   | 386                          |
| Ing5               | NM_025454                       | chr1              | 95700756     | 95701116   | 395                          |
| 1110007C09Rik      | NM_026738                       | chr13             | 49310843     | 49311145   | 400                          |
| Tmem17             | NM_153596                       | chr11             | 22412535     | 22412848   | 407                          |
| Gm14379            | NR_026741                       | chrX              | 6953363      | 6953560    | 412                          |
| Ginm1              | NM_145418                       | chr10             | 7500118      | 7500466    | 422                          |
| Tpm4               | NM_001001491                    | chr8              | 74659418     | 74659819   | 429                          |
| Brd2               | NR_037970                       | chr17             | 34256201     | 34256609   | 439                          |
| Sec62              | NM_027016                       | chr3              | 30692040     | 30692449   | 448                          |
| Ubr2               | NM_001177374                    | chr17             | 47146880     | 47147169   | 456                          |
| Dus3l              | NM_144858                       | chr17             | 56904297     | 56904960   | 456                          |
| Zfp651             | NM_001166644                    | chr9              | 121669439    | 121669781  | 460                          |

**Supplemental Table 3. Significant ChIP-seq E2F3A promoter peaks  
(+/- 2kb from the TSS)**

| <b>Gene Symbol</b> | <b>Refseq<br/>Transcript ID</b> | <b>Chromosome</b> | <b>Start</b> | <b>End</b> | <b>distance<br/>from TSS</b> |
|--------------------|---------------------------------|-------------------|--------------|------------|------------------------------|
| Elk4               | NM_007923                       | chr1              | 133904460    | 133904826  | 462                          |
| Bcl7b              | NM_009745                       | chr5              | 135644540    | 135644869  | 464                          |
| Ddrbk1             | NM_029832                       | chr2              | 130489723    | 130490099  | 469                          |
| Klf11              | NM_178357                       | chr12             | 25336508     | 25336912   | 475                          |
| Rrm2               | NM_009104                       | chr12             | 25393472     | 25393714   | 475                          |
| Cbx5               | NM_001076789                    | chr15             | 103069487    | 103070031  | 487                          |
| Gsn                | NM_001206368                    | chr2              | 35112174     | 35112557   | 488                          |
| Zfp1               | NM_011742                       | chr8              | 114167705    | 114167974  | 498                          |
| Pcna               | NM_011045                       | chr2              | 132078219    | 132078580  | 516                          |
| Trmt2a             | NM_001080999                    | chr16             | 18249351     | 18249709   | 555                          |
| Arsb               | NM_009712                       | chr13             | 94542024     | 94542427   | 593                          |
| Hnrnp1             | NM_177301                       | chr7              | 29596292     | 29596730   | 603                          |
| Pacrg              | NM_027032                       | chr17             | 11032300     | 11032573   | 620                          |
| Hmgn2              | NM_016957                       | chr4              | 133523096    | 133523454  | 630                          |
| Lancl2             | NM_133737                       | chr6              | 57652930     | 57653227   | 631                          |
| Tyms               | NM_021288                       | chr5              | 30399401     | 30399646   | 641                          |
| Ryr3               | NM_177652                       | chr2              | 112869637    | 112869960  | 689                          |
| Epb4.114a          | NM_013512                       | chr18             | 34165984     | 34166320   | 707                          |
| Gosr1              | NM_016810                       | chr11             | 76576154     | 76576515   | 722                          |
| Stmn1              | NM_019641                       | chr4              | 134024786    | 134025130  | 724                          |
| Fus                | NM_139149                       | chr7              | 135111590    | 135111846  | 726                          |
| Xyylt1             | NM_198626                       | chr16             | 31080621     | 31080960   | 727                          |
| Gjc3               | NM_080450                       | chr5              | 138403313    | 138403604  | 728                          |
| Mtnr1a             | NM_008639                       | chr8              | 46155186     | 46155441   | 751                          |
| Bok                | NM_016778                       | chr1              | 95582842     | 95583201   | 752                          |
| Fbxo5              | NM_025995                       | chr10             | 4541666      | 4542001    | 759                          |
| Matr3              | NM_010771                       | chr18             | 35722387     | 35722770   | 768                          |
| Pck2               | NM_028994                       | chr14             | 56159738     | 56160033   | 784                          |
| Dleu2              | NR_028264                       | chr14             | 62300225     | 62300588   | 803                          |
| Actb               | NM_007393                       | chr5              | 143667397    | 143667801  | 803                          |
| Zyx                | NM_001289617                    | chr6              | 42300490     | 42300786   | 812                          |
| Mthfd11            | NM_001170785                    | chr10             | 6372305      | 6372985    | 820                          |
| Vav2               | NM_009500                       | chr2              | 27281353     | 27281694   | 821                          |
| Nuak1              | NM_001004363                    | chr10             | 83902216     | 83902530   | 842                          |
| Gtf2i              | NM_001080748                    | chr5              | 134789621    | 134789883  | 877                          |
| Id3                | NM_008321                       | chr4              | 135700482    | 135700749  | 880                          |
| Meox1              | NM_010791                       | chr11             | 101754571    | 101754900  | 932                          |
| Mbtps1             | NM_019709                       | chr8              | 122081508    | 122081949  | 932                          |
| C030034I22Rik      | NR_026848                       | chr17             | 69766597     | 69766878   | 952                          |
| Sstr5              | NM_001191008                    | chr17             | 25633092     | 25633467   | 953                          |
| Gabbr1             | NM_019439                       | chr17             | 37183697     | 37184050   | 964                          |
| Mcm9               | NM_027830                       | chr10             | 53348976     | 53349480   | 1016                         |
| Tubb5              | NM_011655                       | chr17             | 35973977     | 35974370   | 1072                         |
| Pmp22              | NM_008885                       | chr11             | 62946014     | 62946204   | 1098                         |
| Map4               | NM_001205330                    | chr9              | 109835251    | 109835555  | 1126                         |
| Gpt                | NM_182805                       | chr15             | 76528192     | 76528523   | 1165                         |
| Trp53              | NM_001127233                    | chr11             | 69394873     | 69395205   | 1179                         |

**Supplemental Table 3. Significant ChIP-seq E2F3A promoter peaks  
(+/- 2kb from the TSS)**

| <b>Gene Symbol</b> | <b>Refseq<br/>Transcript ID</b> | <b>Chromosome</b> | <b>Start</b> | <b>End</b> | <b>distance<br/>from TSS</b> |
|--------------------|---------------------------------|-------------------|--------------|------------|------------------------------|
| Tlr7               | NM_001290756                    | chrX              | 163767152    | 163767476  | 1188                         |
| Ddx26b             | NM_172779                       | chrX              | 53709053     | 53709355   | 1189                         |
| Cnnm3              | NM_001039551                    | chr1              | 36569827     | 36570083   | 1235                         |
| Hnrnpu             | NM_016805                       | chr1              | 180266431    | 180266872  | 1263                         |
| Tmem253            | NM_001033805                    | chr14             | 52637675     | 52638010   | 1304                         |
| Abcc1              | NM_008576                       | chr16             | 14362859     | 14363159   | 1359                         |
| Pja1               | NM_008853                       | chrX              | 96664535     | 96664865   | 1373                         |
| Map1b              | NM_008634                       | chr13             | 100285016    | 100285329  | 1384                         |
| Ptma               | NM_008972                       | chr1              | 88424447     | 88425004   | 1416                         |
| Angptl6            | NM_145154                       | chr9              | 20682543     | 20682890   | 1437                         |
| 0610009L18Rik      | NR_038126                       | chr11             | 120211297    | 120211560  | 1438                         |
| Gm17762            | NR_028378                       | chr2              | 17950153     | 17950653   | 1528                         |
| Ccdc51             | NM_025689                       | chr9              | 108986445    | 108986744  | 1586                         |
| Gdf15              | NM_011819                       | chr8              | 73153717     | 73154058   | 1646                         |
| Klhdc10            | NM_029742                       | chr6              | 30353417     | 30353774   | 1688                         |
| Olf1410            | NM_146491                       | chr1              | 94506015     | 94506200   | 1693                         |
| 9130024F11Rik      | NR_024326                       | chr1              | 57029802     | 57030266   | 1722                         |
| Cdkn1a             | NM_007669                       | chr17             | 29232185     | 29232734   | 1744                         |
| Ncam1              | NM_001113204                    | chr9              | 49605194     | 49605424   | 1864                         |
| Nufip1             | NM_013745                       | chr14             | 76512436     | 76512714   | 1878                         |
| Gtpbp2             | NM_019581                       | chr17             | 46299794     | 46300104   | 1969                         |

**Supplemental Table 4. Significant ChIP-seq E2F3B promoter peaks  
(+/- 2kb from the TSS)**

| <b>Gene Symbol</b> | <b>Refseq<br/>Transcript ID</b> | <b>Chromosome</b> | <b>Start</b> | <b>End</b> | <b>distance<br/>from TSS</b> |
|--------------------|---------------------------------|-------------------|--------------|------------|------------------------------|
| Ccdc132            | NM_001167750                    | chr6              | 3446323      | 3446575    | -1943                        |
| Rs1                | NM_011302                       | chrX              | 157203826    | 157204193  | -1935                        |
| Smim4              | NR_024069                       | chr14             | 31943797     | 31944295   | -1931                        |
| Necab3             | NM_021546                       | chr2              | 154386348    | 154386645  | -1909                        |
| Arhgap5            | NM_009706                       | chr12             | 53615036     | 53615385   | -1853                        |
| Wispl              | NM_018865                       | chr15             | 66720969     | 66721279   | -1830                        |
| Slc35e1            | NM_177766                       | chr8              | 75018191     | 75018424   | -1796                        |
| Ywhaz              | NM_001253807                    | chr15             | 36722197     | 36722746   | -1786                        |
| Egr2               | NM_010118                       | chr10             | 66998663     | 66999014   | -1778                        |
| Grm8               | NM_008174                       | chr6              | 28085899     | 28086183   | -1673                        |
| Fam71f1            | NM_001289663                    | chr6              | 29267310     | 29267639   | -1665                        |
| Ccnd1              | NM_007631                       | chr7              | 152127348    | 152127639  | -1665                        |
| Kif14              | NM_001287179                    | chr1              | 138362628    | 138362997  | -1612                        |
| Ssbp4              | NM_133772                       | chr8              | 73133302     | 73134234   | -1556                        |
| Kif16b             | NM_001081133                    | chr2              | 142728579    | 142728907  | -1544                        |
| Cux1               | NM_198602                       | chr5              | 137044689    | 137045107  | -1539                        |
| Mir130a            | NR_029544                       | chr2              | 84582688     | 84583008   | -1514                        |
| Hcfc1              | NM_008224                       | chrX              | 71212907     | 71213363   | -1440                        |
| Cdkn2c             | NM_007671                       | chr4              | 109339221    | 109339553  | -1411                        |
| Igf2bp1            | NM_009951                       | chr11             | 95868485     | 95868828   | -1400                        |
| Wnt5a              | NM_001256224                    | chr14             | 29323037     | 29323354   | -1395                        |
| Rnase4             | NM_021472                       | chr14             | 51709186     | 51709532   | -1392                        |
| Irf2bp2            | NM_001164598                    | chr8              | 129118429    | 129118948  | -1354                        |
| Nfatc4             | NM_001168346                    | chr14             | 56442027     | 56442536   | -1350                        |
| Pde4a              | NM_183408                       | chr9              | 20968587     | 20969045   | -1341                        |
| Zbtb14             | NM_009547                       | chr17             | 69731863     | 69732102   | -1335                        |
| Ptma               | NM_008972                       | chr1              | 88421769     | 88422221   | -1315                        |
| Anks1b             | NM_001128086                    | chr10             | 89334757     | 89335119   | -1315                        |
| Camk2n2            | NM_028420                       | chr16             | 20622525     | 20622778   | -1302                        |
| Fbxw7              | NM_001177773                    | chr3              | 84618006     | 84618415   | -1288                        |
| Hnrnp1             | NM_177301                       | chr7              | 29594507     | 29594752   | -1279                        |
| Rrm2               | NM_009104                       | chr12             | 25391650     | 25392053   | -1267                        |
| Abca7              | NM_013850                       | chr10             | 79458860     | 79459326   | -1266                        |
| Ier2               | NM_010499                       | chr8              | 87187733     | 87188287   | -1260                        |
| Oxtr               | NM_001081147                    | chr6              | 112440972    | 112441137  | -1254                        |
| Wnk1               | NM_198703                       | chr6              | 119989776    | 119990022  | -1227                        |
| Tmem74             | NM_175502                       | chr15             | 43702564     | 43703030   | -1223                        |
| Hecw1              | NM_001081348                    | chr13             | 14616565     | 14616861   | -1221                        |
| Prdm6              | NM_001033281                    | chr18             | 53622828     | 53623134   | -1218                        |
| Scrt1              | NM_130893                       | chr15             | 76353556     | 76353989   | -1215                        |
| Pkn3               | NM_153805                       | chr2              | 29932899     | 29933313   | -1179                        |
| Hes1               | NM_008235                       | chr16             | 30063982     | 30064593   | -1155                        |
| Usp49              | NM_198421                       | chr17             | 47766363     | 47766669   | -1122                        |
| Zdhhc14            | NM_146073                       | chr17             | 5491300      | 5491655    | -1122                        |
| Helb               | NM_080446                       | chr10             | 119551030    | 119551251  | -1121                        |
| Zfp687             | NM_030074                       | chr3              | 94820053     | 94820497   | -1116                        |
| Maoa               | NM_173740                       | chrX              | 16195549     | 16195904   | -1097                        |
| Klhl17             | NM_198305                       | chr4              | 155609932    | 155610184  | -1093                        |

**Supplemental Table 4. Significant ChIP-seq E2F3B promoter peaks  
(+/- 2kb from the TSS)**

| Gene Symbol   | Refseq<br>Transcript ID | Chromosome | Start     | End       | distance<br>from TSS |
|---------------|-------------------------|------------|-----------|-----------|----------------------|
| Pdgfra        | NM_011058               | chr5       | 75547024  | 75547445  | -1081                |
| Zdhhc5        | NM_144887               | chr2       | 84556284  | 84556511  | -1078                |
| Actrt3        | NM_029690               | chr3       | 30499672  | 30500009  | -1050                |
| Zbtb14        | NM_009547               | chr17      | 69732176  | 69732369  | -1045                |
| Cnot6l        | NM_144910               | chr5       | 96591869  | 96592212  | -1033                |
| Rasgrf1       | NM_011245               | chr9       | 89803404  | 89803755  | -1033                |
| 9330111N05Rik | NR_015587               | chr13      | 81102133  | 81102496  | -1020                |
| Rusc1         | NM_001083808            | chr3       | 88894734  | 88895166  | -998                 |
| Trib1         | NM_144549               | chr15      | 59478929  | 59479508  | -990                 |
| Mir6976       | NR_105942               | chr17      | 46691635  | 46692015  | -988                 |
| Gm608         | NM_001029889            | chr16      | 44172417  | 44172627  | -987                 |
| Fam222a       | NM_001004180            | chr5       | 115017148 | 115017411 | -980                 |
| Ctdspl        | NM_133710               | chr9       | 118834471 | 118834879 | -978                 |
| Atp13a3       | NM_001128094            | chr16      | 30389411  | 30389768  | -975                 |
| Toporsos      | NR_045265               | chr4       | 40215523  | 40215777  | -961                 |
| Rbpj          | NM_009035               | chr5       | 53980259  | 53980987  | -961                 |
| Kmt2a         | NM_001081049            | chr9       | 44690188  | 44690419  | -948                 |
| Fndc3b        | NM_173182               | chr3       | 27610097  | 27610493  | -935                 |
| Mat2b         | NM_134017               | chr11      | 40506919  | 40507306  | -930                 |
| Khdrbs1       | NR_045036               | chr4       | 129420292 | 129420592 | -896                 |
| Maz           | NM_010772               | chr7       | 134170605 | 134171163 | -892                 |
| Capzb         | NM_001271406            | chr4       | 138788227 | 138788588 | -890                 |
| Itpril2       | NM_001033380            | chr7       | 125636183 | 125636567 | -887                 |
| Papd7         | NM_198600               | chr13      | 69673364  | 69673848  | -865                 |
| Scaf1         | NM_001008422            | chr7       | 52272375  | 52272588  | -864                 |
| Gmppa         | NM_133708               | chr1       | 75431552  | 75431765  | -859                 |
| Lphn3         | NM_198702               | chr5       | 81449628  | 81449894  | -856                 |
| Mir7655       | NR_106115               | chr2       | 17978461  | 17978779  | -852                 |
| Sox12         | NM_011438               | chr2       | 152224484 | 152224774 | -848                 |
| Ep300         | NM_177821               | chr15      | 81415584  | 81416011  | -846                 |
| Lamb2         | NM_008483               | chr9       | 108381187 | 108381508 | -845                 |
| Arid1a        | NM_001080819            | chr4       | 133310160 | 133310563 | -837                 |
| Ubtf          | NM_001044383            | chr11      | 102179299 | 102179566 | -833                 |
| Igfbp6        | NM_008344               | chr15      | 101973621 | 101973948 | -832                 |
| Pbx3          | NM_016768               | chr2       | 34228110  | 34228674  | -828                 |
| Gxylt1        | NM_001033275            | chr15      | 93106245  | 93106431  | -824                 |
| Sox2          | NM_011443               | chr3       | 34547862  | 34548357  | -817                 |
| Tbcc          | NM_178385               | chr17      | 47026561  | 47026953  | -812                 |
| Nfib          | NM_001113210            | chr4       | 82152313  | 82152673  | -811                 |
| Tle3          | NM_009389               | chr9       | 61219182  | 61219551  | -806                 |
| Fosl2         | NM_008037               | chr5       | 32437759  | 32438321  | -804                 |
| Camk2n2       | NM_028420               | chr16      | 20621805  | 20622486  | -796                 |
| Nova1         | NM_021361               | chr12      | 47920411  | 47920701  | -795                 |
| Usf2          | NM_011680               | chr7       | 31742350  | 31742882  | -795                 |
| Ccne2         | NM_001037134            | chr4       | 11117417  | 11117995  | -791                 |
| Ptprs         | NM_001252456            | chr17      | 56602273  | 56602575  | -781                 |
| Bcl3          | NM_033601               | chr7       | 20408719  | 20409044  | -779                 |
| Nuak1         | NM_001004363            | chr10      | 83903754  | 83904232  | -778                 |

**Supplemental Table 4. Significant ChIP-seq E2F3B promoter peaks (+/- 2kb from the TSS)**

| Gene Symbol   | Refseq Transcript ID | Chromosome | Start     | End       | distance from TSS |
|---------------|----------------------|------------|-----------|-----------|-------------------|
| Gse1          | NM_198671            | chr8       | 123011851 | 123012125 | -777              |
| Atp2b1        | NM_026482            | chr10      | 98376841  | 98377192  | -769              |
| Slk           | NM_009289            | chr19      | 47653577  | 47653905  | -767              |
| Slc25a25      | NM_146118            | chr2       | 32307614  | 32307890  | -763              |
| Tnfrsf10b     | NM_009397            | chr10      | 18735816  | 18736133  | -760              |
| Ptch1         | NM_008957            | chr13      | 63667420  | 63667752  | -759              |
| Pik3r3        | NM_181585            | chr4       | 115893577 | 115893942 | -759              |
| Pdzd7         | NM_001195265         | chr19      | 45120852  | 45121183  | -757              |
| Slc12a6       | NM_133649            | chr2       | 112105595 | 112105835 | -755              |
| Hmga1         | NM_001166535         | chr17      | 27692003  | 27693529  | -752              |
| Sp4           | NM_009239            | chr12      | 119540418 | 119540901 | -748              |
| Mpnd          | NM_026530            | chr17      | 56147686  | 56148070  | -745              |
| Map3k3        | NM_011947            | chr11      | 105945324 | 105945620 | -743              |
| Ing1          | NM_011919            | chr8       | 11555102  | 11555553  | -738              |
| Mir1191b      | NR_106141            | chr10      | 80879439  | 80880106  | -732              |
| Lasp1         | NM_010688            | chr11      | 97660090  | 97660427  | -727              |
| Efemp2        | NM_021474            | chr19      | 5473820   | 5474106   | -726              |
| Kif13a        | NM_010617            | chr13      | 47025612  | 47025993  | -717              |
| Zfpm1         | NM_009569            | chr8       | 124805175 | 124805490 | -708              |
| Dennd4b       | NM_201407            | chr3       | 90069372  | 90070085  | -707              |
| Mycn          | NM_008709            | chr12      | 12949226  | 12949461  | -703              |
| Irs2          | NM_001081212         | chr8       | 11008842  | 11009404  | -694              |
| Smarcd3       | NM_025891            | chr5       | 24108285  | 24108733  | -690              |
| Kctd20        | NM_025888            | chr17      | 29089289  | 29089663  | -684              |
| Smad7         | NM_001042660         | chr18      | 75526191  | 75526484  | -681              |
| Lgals1        | NM_008495            | chr15      | 78756342  | 78756606  | -680              |
| Tsc22d1       | NM_207652            | chr14      | 76814784  | 76815121  | -675              |
| Gpbp11        | NM_029868            | chr4       | 116229461 | 116229855 | -673              |
| 1190002F15Rik | NR_037956            | chr6       | 134878212 | 134878675 | -666              |
| Polr2a        | NM_001291068         | chr11      | 69572625  | 69572973  | -665              |
| Hdgfrp2       | NM_008233            | chr17      | 56218277  | 56218555  | -663              |
| Hist1h2be     | NM_001290530         | chr13      | 23678347  | 23678647  | -659              |
| Sipa11        | NM_001167983         | chr12      | 83270198  | 83270492  | -657              |
| Meis2         | NM_001159568         | chr2       | 115891172 | 115891728 | -657              |
| Pidd1         | NM_022654            | chr7       | 148629773 | 148630036 | -652              |
| Ndufa13       | NM_023312            | chr8       | 72426983  | 72427228  | -650              |
| Stk11         | NM_011492            | chr10      | 79578363  | 79578907  | -645              |
| Hmgb1         | NM_010439            | chr5       | 149865104 | 149865409 | -645              |
| Rnd2          | NM_009708            | chr11      | 101328801 | 101329222 | -640              |
| Memo1         | NM_133771            | chr17      | 74694717  | 74694966  | -640              |
| Slc12a2       | NM_009194            | chr18      | 58037534  | 58037853  | -638              |
| Mirlet7i      | NR_029527            | chr10      | 122423043 | 122423786 | -636              |
| Sppl3         | NM_029012            | chr5       | 115460623 | 115461171 | -635              |
| Pim1          | NM_008842            | chr17      | 29627089  | 29627624  | -633              |
| Csnk1g2       | NM_134002            | chr10      | 80084695  | 80085089  | -632              |
| Ciart         | NM_001033302         | chr3       | 95686546  | 95687017  | -632              |
| Sp1           | NM_013672            | chr15      | 102235691 | 102236539 | -631              |
| Dyrk1a        | NM_007890            | chr16      | 94790999  | 94791363  | -631              |



**Supplemental Table 4. Significant ChIP-seq E2F3B promoter peaks  
(+/- 2kb from the TSS)**

| Gene Symbol   | Refseq<br>Transcript ID | Chromosome | Start     | End       | distance<br>from TSS |
|---------------|-------------------------|------------|-----------|-----------|----------------------|
| Jag1          | NM_013822               | chr2       | 136942682 | 136943085 | -629                 |
| Ch25h         | NM_009890               | chr19      | 34550093  | 34550409  | -627                 |
| Tnrc6b        | NM_177124               | chr15      | 80628241  | 80628593  | -622                 |
| Mex3a         | NM_001029890            | chr3       | 88335460  | 88335937  | -618                 |
| Sdccag8       | NM_029756               | chr1       | 178744010 | 178744340 | -615                 |
| 4930577N17Rik | NR_073429               | chr3       | 51079860  | 51080277  | -614                 |
| Gm53          | NR_037977               | chr11      | 96112107  | 96112622  | -609                 |
| Ccdc88a       | NM_176841               | chr11      | 29273374  | 29273755  | -607                 |
| Ptpn4         | NM_019933               | chr1       | 121734084 | 121734419 | -605                 |
| Rpl7l1        | NM_025433               | chr17      | 46920079  | 46920337  | -604                 |
| Xpo1          | NM_001035226            | chr11      | 23155199  | 23155693  | -594                 |
| Rap2a         | NM_029519               | chr14      | 120876938 | 120877239 | -594                 |
| Pigg          | NM_001081234            | chr5       | 108741166 | 108741535 | -593                 |
| Smg7          | NM_001160256            | chr1       | 154750227 | 154750492 | -585                 |
| Rnf26         | NM_153762               | chr9       | 43921569  | 43921866  | -585                 |
| Rara          | NM_001176528            | chr11      | 98821095  | 98821308  | -583                 |
| Fzr1          | NM_019757               | chr10      | 80841485  | 80841901  | -579                 |
| Actn1         | NM_134156               | chr12      | 81361760  | 81362110  | -578                 |
| Tiparp        | NM_178892               | chr3       | 65331642  | 65331941  | -577                 |
| Cit           | NM_007708               | chr5       | 116294837 | 116295348 | -572                 |
| Spry2         | NM_011897               | chr14      | 106296483 | 106296729 | -571                 |
| Vgll3         | NM_028572               | chr16      | 65815122  | 65815493  | -570                 |
| Gli3          | NM_008130               | chr13      | 15554704  | 15555272  | -567                 |
| Ubp2          | NM_026872               | chr4       | 41222399  | 41223064  | -565                 |
| Spsb4         | NM_145134               | chr9       | 96919001  | 96919663  | -559                 |
| Stim1         | NM_009287               | chr7       | 109415632 | 109415934 | -554                 |
| Usp1          | NM_146144               | chr4       | 98589830  | 98590067  | -552                 |
| 1110038B12Rik | NR_015536               | chr17      | 35089787  | 35090139  | -548                 |
| Dixdc1        | NM_178118               | chr9       | 50536470  | 50536801  | -548                 |
| G3bp1         | NM_013716               | chr11      | 55282506  | 55282922  | -539                 |
| Tmem170b      | NM_001163572            | chr13      | 41700777  | 41701315  | -538                 |
| Enthd1        | NM_001163189            | chr15      | 80391281  | 80391590  | -537                 |
| Srsf3         | NM_013663               | chr17      | 29168929  | 29169207  | -536                 |
| Lphn1         | NM_181039               | chr8       | 86423337  | 86423596  | -530                 |
| Btbd10        | NM_133700               | chr7       | 120513245 | 120513514 | -528                 |
| 9130023H24Rik | NM_177001               | chr7       | 135381941 | 135382183 | -518                 |
| Cd3eap        | NM_145822               | chr7       | 19945181  | 19945505  | -512                 |
| Fnip2         | NM_001162999            | chr3       | 79371893  | 79372318  | -506                 |
| Cox20         | NM_025511               | chr1       | 180248532 | 180249027 | -504                 |
| H3f3a         | NM_008210               | chr1       | 182744078 | 182744391 | -502                 |
| Zfp219        | NM_001253694            | chr14      | 52639477  | 52640299  | -501                 |
| Zbed4         | NM_181412               | chr15      | 88581434  | 88581852  | -497                 |
| Rnf44         | NR_027396               | chr13      | 54795658  | 54795973  | -496                 |
| Brat1         | NM_181066               | chr5       | 141180192 | 141180745 | -496                 |
| E2f3          | NM_001289920            | chr13      | 30076548  | 30076956  | -493                 |
| Hnrnpa0       | NM_029872               | chr13      | 58230248  | 58230565  | -491                 |
| Fchsd2        | NM_001146010            | chr7       | 108256593 | 108257002 | -491                 |
| Klf10         | NM_001289471            | chr15      | 38230681  | 38231223  | -487                 |

**Supplemental Table 4. Significant ChIP-seq E2F3B promoter peaks  
(+/- 2kb from the TSS)**

| Gene Symbol   | Refseq<br>Transcript ID | Chromosome | Start     | End       | distance<br>from TSS |
|---------------|-------------------------|------------|-----------|-----------|----------------------|
| Mir130a       | NR_029544               | chr2       | 84581677  | 84581964  | -487                 |
| Agap3         | NM_139153               | chr5       | 23957340  | 23957679  | -485                 |
| Sh3bp1        | NM_009164               | chr15      | 78729593  | 78729874  | -482                 |
| Opn3          | NM_010098               | chr1       | 177623076 | 177623410 | -481                 |
| Mxd3          | NM_016662               | chr13      | 55431190  | 55431941  | -476                 |
| Phf13         | NM_172705               | chr4       | 151370589 | 151370931 | -473                 |
| Lrrfip1       | NM_008515               | chr1       | 92949354  | 92949741  | -473                 |
| Socs1         | NM_009896               | chr16      | 10785859  | 10786341  | -472                 |
| Cul1          | NM_012042               | chr6       | 47403683  | 47404025  | -468                 |
| D630045J12Rik | NM_194061               | chr6       | 38204285  | 38204664  | -467                 |
| Etv6          | NM_007961               | chr6       | 133984929 | 133985593 | -463                 |
| Ercc4         | NM_015769               | chr16      | 13109213  | 13109518  | -463                 |
| Gm14005       | NR_028589               | chr2       | 128255380 | 128255706 | -457                 |
| Rgl2          | NM_009059               | chr17      | 34066144  | 34066619  | -457                 |
| Dpagt1        | NM_007875               | chr9       | 44134246  | 44134698  | -455                 |
| Tle4          | NM_011600               | chr19      | 14672717  | 14673124  | -449                 |
| Mtrf1l        | NM_175374               | chr10      | 4521981   | 4522319   | -447                 |
| Tcf3          | NM_001164147            | chr10      | 79896531  | 79897157  | -447                 |
| Msl2          | NM_001100451            | chr9       | 100977801 | 100978275 | -447                 |
| Usp34         | NM_001190401            | chr11      | 23206262  | 23206637  | -445                 |
| Samd1         | NM_001081415            | chr8       | 86520940  | 86521312  | -444                 |
| Yars2         | NM_198246               | chr16      | 16302488  | 16302743  | -442                 |
| Emilin1       | NM_133918               | chr5       | 31215534  | 31215899  | -442                 |
| Sertad2       | NM_001038625            | chr11      | 20531349  | 20531730  | -440                 |
| Psen1         | NM_008943               | chr12      | 85028920  | 85029231  | -437                 |
| Hspa2         | NM_001002012            | chr12      | 77504495  | 77504965  | -432                 |
| Tbx15         | NM_009323               | chr3       | 99057090  | 99057419  | -428                 |
| Arih1         | NM_019927               | chr9       | 59334410  | 59334804  | -427                 |
| Msantd2       | NM_146222               | chr9       | 37296310  | 37296649  | -426                 |
| Ctdnep1       | NM_026017               | chr11      | 69794070  | 69794432  | -418                 |
| Cmip          | NM_001163262            | chr8       | 119780286 | 119780715 | -418                 |
| Ipo5          | NM_023579               | chr14      | 121309755 | 121310244 | -416                 |
| Zfp46         | NM_009557               | chr4       | 135841270 | 135841877 | -410                 |
| Pop7          | NM_028753               | chr5       | 137943696 | 137944434 | -409                 |
| Gtpbp1        | NM_013818               | chr15      | 79520577  | 79521258  | -408                 |
| Igf1r         | NM_010513               | chr7       | 75096611  | 75096863  | -405                 |
| Bicd2         | NM_001039179            | chr13      | 49436234  | 49436791  | -405                 |
| Zfp36l2       | NM_001001806            | chr17      | 84587069  | 84588308  | -403                 |
| Nfkbiz        | NM_001159394            | chr16      | 55822504  | 55822793  | -399                 |
| Rere          | NM_001085492            | chr4       | 149655431 | 149655821 | -398                 |
| Rps19         | NM_023133               | chr7       | 25669058  | 25669614  | -396                 |
| Khk           | NM_008439               | chr5       | 31223703  | 31224040  | -396                 |
| Ppp1r12a      | NM_027892               | chr10      | 107598828 | 107599294 | -394                 |
| Ubb           | NM_011664               | chr11      | 62364433  | 62364789  | -394                 |
| Ube2s         | NM_133777               | chr7       | 4764163   | 4764507   | -394                 |
| Alkbh5        | NM_172943               | chr11      | 60350641  | 60350945  | -391                 |
| Gls2          | NM_001033264            | chr10      | 127631060 | 127631539 | -391                 |
| Nfix          | NM_001081981            | chr8       | 87298519  | 87298793  | -389                 |

**Supplemental Table 4. Significant ChIP-seq E2F3B promoter peaks (+/- 2kb from the TSS)**

| Gene Symbol | Refseq Transcript ID | Chromosome | Start     | End       | distance from TSS |
|-------------|----------------------|------------|-----------|-----------|-------------------|
| Atn1        | NM_007881            | chr6       | 124706734 | 124707050 | -388              |
| Txndc12     | NM_025334            | chr4       | 108506768 | 108507026 | -385              |
| Kpnb1       | NM_008379            | chr11      | 97049102  | 97050077  | -385              |
| Sh3bp4      | NM_133816            | chr1       | 90966425  | 90966881  | -383              |
| Ppp2r5a     | NM_144880            | chr1       | 193221170 | 193221430 | -381              |
| Cdca7l      | NM_146040            | chr12      | 119081793 | 119082115 | -379              |
| Eya4        | NM_010167            | chr10      | 23069912  | 23070259  | -378              |
| Atp13a3     | NM_001128094         | chr16      | 30388873  | 30389109  | -376              |
| Vat1l       | NM_173016            | chr8       | 116728929 | 116729405 | -372              |
| Patz1       | NM_001253691         | chr11      | 3189920   | 3190260   | -369              |
| Sertad2     | NM_021372            | chr11      | 20442674  | 20443101  | -368              |
| Nrg2        | NM_001167891         | chr18      | 36357001  | 36357359  | -367              |
| Brd3        | NM_001113574         | chr2       | 27331387  | 27331729  | -366              |
| Zfp444      | NM_001146024         | chr7       | 6123506   | 6123990   | -366              |
| Phf21a      | NM_138755            | chr2       | 92023862  | 92024088  | -363              |
| Fam83d      | NM_027975            | chr2       | 158593290 | 158593652 | -363              |
| Otud4       | NM_001256033         | chr8       | 82162787  | 82163638  | -362              |
| Ran         | NM_009391            | chr5       | 129525477 | 129525861 | -361              |
| Rev1        | NM_019570            | chr1       | 38186656  | 38187075  | -360              |
| Fzd5        | NM_001042659         | chr1       | 64784481  | 64784884  | -360              |
| Timmcd1     | NM_024273            | chr16      | 38522979  | 38523232  | -360              |
| Raph1       | NM_001045513         | chr1       | 60623834  | 60624099  | -359              |
| Zfxh2       | NM_001039198         | chr14      | 55711132  | 55711352  | -358              |
| Clic4       | NM_013885            | chr4       | 134828872 | 134829190 | -357              |
| Neo1        | NM_001042752         | chr9       | 58884440  | 58884766  | -356              |
| Smc3        | NM_007790            | chr19      | 53674364  | 53674695  | -356              |
| Timm8a1     | NM_013898            | chrX       | 131076413 | 131076630 | -355              |
| Incenp      | NM_016692            | chr19      | 9974259   | 9974492   | -354              |
| Mef2a       | NM_001291196         | chr7       | 74517949  | 74518238  | -351              |
| Efnb2       | NM_010111            | chr8       | 8660883   | 8661359   | -349              |
| Wbscr17     | NM_145218            | chr5       | 131783513 | 131783966 | -349              |
| Ctnna3      | NM_177612            | chr10      | 62892313  | 62892684  | -347              |
| Amigo1      | NM_146137            | chr3       | 107988758 | 107988961 | -347              |
| Calm2       | NM_007589            | chr17      | 87846441  | 87846794  | -344              |
| Gpr124      | NM_054044            | chr8       | 28195825  | 28196112  | -344              |
| Eno1        | NM_023119            | chr4       | 149610763 | 149611163 | -342              |
| Klf7        | NM_033563            | chr1       | 64168094  | 64168511  | -341              |
| Nipbl       | NM_027707            | chr15      | 8394597   | 8395008   | -341              |
| Foxp4       | NM_001110825         | chr17      | 48061595  | 48062242  | -339              |
| Rreb1       | NR_033615            | chr13      | 37918305  | 37918579  | -338              |
| Cd164       | NM_016898            | chr10      | 41238788  | 41239147  | -338              |
| Fbxo5       | NM_025995            | chr10      | 4540224   | 4541253   | -337              |
| Ago2        | NM_153178            | chr15      | 73015479  | 73015946  | -337              |
| Hexim2      | NM_001130516         | chr11      | 102994099 | 102994534 | -336              |
| Atxn7l3     | NM_001098837         | chr11      | 102158163 | 102158389 | -334              |
| Rbm15b      | NM_175402            | chr9       | 106789500 | 106789828 | -334              |
| Vcl         | NM_009502            | chr14      | 21748132  | 21748510  | -333              |
| Lrp12       | NM_172814            | chr15      | 39775482  | 39775788  | -333              |

**Supplemental Table 4. Significant ChIP-seq E2F3B promoter peaks  
(+/- 2kb from the TSS)**

| Gene Symbol   | Refseq<br>Transcript ID | Chromosome | Start     | End       | distance<br>from TSS |
|---------------|-------------------------|------------|-----------|-----------|----------------------|
| Zfp946        | NM_198003               | chr17      | 22560794  | 22561009  | -333                 |
| Cdkn2a        | NM_009877               | chr4       | 88940451  | 88941256  | -332                 |
| Rfx2          | NM_009056               | chr17      | 56970511  | 56971011  | -331                 |
| Fam98b        | NM_026620               | chr2       | 117074987 | 117075299 | -331                 |
| Hdac2         | NM_008229               | chr10      | 36693878  | 36694159  | -331                 |
| Ilf3          | NM_001277322            | chr9       | 21172349  | 21172945  | -328                 |
| Set           | NM_001204875            | chr2       | 29921500  | 29921831  | -328                 |
| Slmo2         | NM_025531               | chr2       | 174298569 | 174298968 | -328                 |
| Rmi1          | NR_031761               | chr13      | 58503141  | 58503424  | -326                 |
| Cdk5rap2      | NM_145990               | chr4       | 70071623  | 70071827  | -325                 |
| Tram2         | NM_177409               | chr1       | 21069416  | 21069843  | -325                 |
| Vkorc111      | NM_001001327            | chr5       | 130417363 | 130417946 | -324                 |
| Ptp4a1        | NM_011200               | chr1       | 31006757  | 31007087  | -323                 |
| Suco          | NM_172645               | chr1       | 163806884 | 163807342 | -322                 |
| Spred1        | NM_033524               | chr2       | 116946352 | 116946618 | -321                 |
| Fbxo30        | NM_027968               | chr10      | 11000604  | 11001010  | -320                 |
| BC052040      | NM_001145898            | chr2       | 115407022 | 115407240 | -320                 |
| Mapkapk2      | NM_008551               | chr1       | 132994313 | 132994558 | -317                 |
| Rbbp5         | NM_172517               | chr1       | 134373493 | 134373760 | -317                 |
| Phip          | NM_001081216            | chr9       | 82869140  | 82869683  | -317                 |
| Tcf711        | NM_001079822            | chr6       | 72739176  | 72739531  | -316                 |
| Tmem55b       | NM_001033271            | chr14      | 51550653  | 51551023  | -315                 |
| Xpo4          | NM_020506               | chr14      | 58283938  | 58284276  | -315                 |
| Gphn          | NM_145965               | chr12      | 79327019  | 79327635  | -314                 |
| Sorbs3        | NM_001271408            | chr14      | 70604642  | 70604844  | -314                 |
| Rfx1          | NM_009055               | chr8       | 86590286  | 86590554  | -314                 |
| Rbm33         | NM_028234               | chr5       | 28643059  | 28643771  | -313                 |
| Yy1           | NM_009537               | chr12      | 110030951 | 110031465 | -312                 |
| Gm608         | NM_001029889            | chr16      | 44173062  | 44173336  | -310                 |
| Six5          | NM_011383               | chr7       | 19679437  | 19679727  | -310                 |
| Usp53         | NM_133857               | chr3       | 122687490 | 122687855 | -309                 |
| Gm13375       | NR_033225               | chr2       | 20890026  | 20890358  | -308                 |
| Gatad2a       | NM_001286450            | chr8       | 72520437  | 72520743  | -308                 |
| Afmid         | NM_027827               | chr11      | 117686553 | 117687296 | -308                 |
| Snrpd3        | NM_026095               | chr10      | 74980278  | 74980685  | -305                 |
| 2310057M21Rik | NM_026655               | chr7       | 138506342 | 138506689 | -305                 |
| Ubt1          | NM_145500               | chr19      | 42055779  | 42056118  | -304                 |
| Scaf11        | NM_028148               | chr15      | 96291353  | 96291798  | -303                 |
| Tead3         | NM_011566               | chr17      | 28487812  | 28488290  | -302                 |
| Ddx39b        | NM_019693               | chr17      | 35378226  | 35378552  | -301                 |
| Zfp609        | NM_172536               | chr9       | 65675529  | 65675813  | -301                 |
| Bcl9l         | NM_030256               | chr9       | 44306611  | 44307224  | -301                 |
| Slc16a6       | NM_001029842            | chr11      | 109335013 | 109335405 | -300                 |
| Rictor        | NM_030168               | chr15      | 6657908   | 6658252   | -300                 |
| Klf13         | NM_021366               | chr7       | 71083863  | 71084336  | -300                 |
| Abhd17c       | NM_133722               | chr7       | 91300566  | 91300837  | -300                 |
| D17Wsu92e     | NM_001271511            | chr17      | 27957610  | 27957960  | -299                 |
| Sap25         | NM_001081962            | chr5       | 138082250 | 138082552 | -299                 |

**Supplemental Table 4. Significant ChIP-seq E2F3B promoter peaks  
(+/- 2kb from the TSS)**

| Gene Symbol   | Refseq<br>Transcript ID | Chromosome | Start     | End       | distance<br>from TSS |
|---------------|-------------------------|------------|-----------|-----------|----------------------|
| Mlec          | NM_175403               | chr5       | 115608221 | 115608744 | -299                 |
| A230028O05Rik | NR_040374               | chr16      | 25059239  | 25059613  | -298                 |
| Aebp2         | NM_001005605            | chr6       | 140571649 | 140572174 | -298                 |
| Aff1          | NM_133919               | chr5       | 104182789 | 104182978 | -297                 |
| Cdk13         | NM_001081058            | chr13      | 17897111  | 17897341  | -296                 |
| Zfp760        | NM_001008501            | chr17      | 21844238  | 21844585  | -296                 |
| Rnf41         | NM_026259               | chr10      | 127848175 | 127848578 | -295                 |
| Nudt8         | NM_025529               | chr19      | 4000107   | 4000462   | -295                 |
| Nfe2l2        | NM_010902               | chr2       | 75542809  | 75543171  | -293                 |
| Ric8b         | NM_183172               | chr10      | 84379755  | 84380374  | -293                 |
| Mllt1         | NM_022328               | chr17      | 57074911  | 57075293  | -292                 |
| Raly          | NM_001139513            | chr2       | 154616331 | 154616775 | -292                 |
| Ints6         | NM_008715               | chr14      | 63380065  | 63380413  | -291                 |
| Lipt1         | NM_001037918            | chr1       | 37928602  | 37928918  | -290                 |
| Lcorl         | NM_178142               | chr5       | 46248766  | 46249366  | -288                 |
| Nupl1         | NM_170591               | chr14      | 60870186  | 60870817  | -288                 |
| Ezh2          | NM_007971               | chr6       | 47544995  | 47545636  | -288                 |
| Rock2         | NM_009072               | chr12      | 16901209  | 16901785  | -286                 |
| Commd3        | NM_147778               | chr2       | 18593630  | 18593974  | -286                 |
| Ccng2         | NM_007635               | chr5       | 93696072  | 93696553  | -286                 |
| Siah1b        | NM_009173               | chrX       | 160513985 | 160514545 | -285                 |
| Sik2          | NM_178710               | chr9       | 50817271  | 50817648  | -283                 |
| Lmnb1         | NM_010721               | chr18      | 56867027  | 56867341  | -282                 |
| Gm9958        | NR_045618               | chr5       | 90795585  | 90795895  | -282                 |
| Ctcf          | NM_181322               | chr8       | 108159862 | 108160450 | -281                 |
| Tsen34        | NM_024168               | chr7       | 3645494   | 3646163   | -281                 |
| Ptma          | NM_008972               | chr1       | 88422678  | 88423382  | -280                 |
| Snai2         | NM_011415               | chr16      | 14705390  | 14705952  | -280                 |
| Smg5          | NM_178246               | chr3       | 88139787  | 88140016  | -280                 |
| Dctn1         | NM_001198866            | chr6       | 83115400  | 83115876  | -279                 |
| Usp1          | NM_001013378            | chr5       | 149995736 | 149995978 | -278                 |
| Abcc10        | NM_170680               | chr17      | 46465031  | 46465464  | -277                 |
| Klf6          | NM_011803               | chr13      | 5860269   | 5860647   | -276                 |
| Nup153        | NM_175749               | chr13      | 46823271  | 46823714  | -276                 |
| Grpel1        | NM_024478               | chr5       | 36807374  | 36807741  | -276                 |
| Prkce         | NM_011104               | chr17      | 86566647  | 86567052  | -275                 |
| Gpc2          | NM_172412               | chr5       | 138721080 | 138721796 | -274                 |
| Fam214a       | NM_001113283            | chr9       | 74800290  | 74800880  | -274                 |
| Ube2n         | NM_080560               | chr10      | 94977235  | 94977809  | -273                 |
| Cd2ap         | NM_009847               | chr17      | 43013477  | 43013813  | -273                 |
| Hmgb2         | NM_008252               | chr8       | 59990056  | 59990678  | -272                 |
| Sh2b3         | NM_008507               | chr5       | 122286859 | 122287301 | -271                 |
| Kmt2b         | NM_029274               | chr7       | 31373879  | 31374147  | -269                 |
| Cdc34         | NM_177613               | chr10      | 79144474  | 79144867  | -269                 |
| Nr4a2         | NM_001139509            | chr2       | 56976551  | 56976812  | -269                 |
| Ube2q1        | NM_027315               | chr3       | 89577032  | 89577491  | -269                 |
| Mgat1         | NM_010794               | chr11      | 49057153  | 49057696  | -268                 |
| Phrf1         | NM_001081118            | chr7       | 148414266 | 148414571 | -268                 |

**Supplemental Table 4. Significant ChIP-seq E2F3B promoter peaks  
(+/- 2kb from the TSS)**

| Gene Symbol   | Refseq<br>Transcript ID | Chromosome | Start     | End       | distance<br>from TSS |
|---------------|-------------------------|------------|-----------|-----------|----------------------|
| Fads2         | NM_019699               | chr19      | 10175995  | 10176522  | -267                 |
| Ywhaq         | NM_011739               | chr12      | 21423247  | 21423876  | -266                 |
| Dicer1        | NM_148948               | chr12      | 105990256 | 105990596 | -265                 |
| Hspa4         | NM_008300               | chr11      | 53114118  | 53114371  | -265                 |
| Pdik1l        | NM_001163794            | chr4       | 133843265 | 133843598 | -265                 |
| 2410002F23Rik | NM_025880               | chr7       | 51501658  | 51501995  | -265                 |
| Sco2          | NM_001111288            | chr15      | 89204361  | 89204663  | -264                 |
| Nup50         | NM_016714               | chr15      | 84753220  | 84753967  | -264                 |
| Usp42         | NM_029749               | chr5       | 144493279 | 144493544 | -264                 |
| Brpf1         | NM_030178               | chr6       | 113256709 | 113257024 | -264                 |
| Zbtb25        | NM_028356               | chr12      | 77470514  | 77471104  | -263                 |
| Zbtb12        | NM_198886               | chr17      | 35030927  | 35031553  | -263                 |
| Pcbp2         | NM_011042               | chr15      | 102300591 | 102301009 | -262                 |
| B9d1          | NM_013717               | chr11      | 61318198  | 61318625  | -262                 |
| Rab5c         | NM_024456               | chr11      | 100599465 | 100599944 | -262                 |
| Cbx8          | NM_013926               | chr11      | 118902296 | 118902679 | -262                 |
| Dtnb          | NM_001162465            | chr12      | 3571904   | 3572353   | -262                 |
| Ccdc85c       | NM_001159910            | chr12      | 109513685 | 109514090 | -262                 |
| Usp32         | NM_001029934            | chr11      | 84953571  | 84953863  | -261                 |
| Scaf8         | NM_134123               | chr17      | 3114242   | 3115178   | -261                 |
| Sox4          | NM_009238               | chr13      | 29045569  | 29046051  | -260                 |
| Phf19         | NM_028716               | chr2       | 34769645  | 34769864  | -260                 |
| Ppig          | NM_001081086            | chr2       | 69560627  | 69561142  | -260                 |
| Kat6a         | NM_001081149            | chr8       | 23969598  | 23969903  | -260                 |
| Ybx2          | NM_016875               | chr11      | 69748910  | 69749372  | -259                 |
| Psmc1         | NM_027357               | chr1       | 87960836  | 87961035  | -258                 |
| Map4k4        | NM_001252202            | chr1       | 39957317  | 39957683  | -257                 |
| Morc2a        | NM_001159288            | chr11      | 3549057   | 3549421   | -257                 |
| Fam208b       | NM_134063               | chr13      | 3610422   | 3610793   | -255                 |
| Zmynd19       | NM_026021               | chr2       | 24804803  | 24805330  | -255                 |
| Amotl2        | NM_019764               | chr9       | 102619528 | 102620230 | -254                 |
| Nova1         | NM_021361               | chr12      | 47919874  | 47920154  | -253                 |
| Gxylt1        | NM_001033275            | chr15      | 93105596  | 93105938  | -253                 |
| Sema3c        | NM_013657               | chr5       | 17080180  | 17080580  | -253                 |
| Mat2a         | NM_145569               | chr6       | 72389518  | 72390088  | -252                 |
| Gtpbp3        | NM_032544               | chr8       | 74011582  | 74011916  | -252                 |
| Trim59        | NM_025863               | chr3       | 68848629  | 68849200  | -252                 |
| Apoo          | NM_026673               | chrX       | 91611934  | 91612459  | -252                 |
| Polr3h        | NM_030229               | chr15      | 81756749  | 81757036  | -251                 |
| Commd7        | NM_001195390            | chr2       | 153458666 | 153458867 | -251                 |
| Gnaz          | NM_010311               | chr10      | 74429586  | 74429864  | -250                 |
| Sdk1          | NM_177879               | chr5       | 141716834 | 141717640 | -250                 |
| lpo7          | NM_181517               | chr7       | 117161498 | 117161879 | -250                 |
| Arhgap20      | NM_175535               | chr9       | 51573095  | 51573320  | -249                 |
| Adam10        | NM_007399               | chr9       | 70526357  | 70526761  | -248                 |
| Hinfp         | NM_172162               | chr9       | 44113827  | 44114174  | -248                 |
| Snhg8         | NR_028574               | chr3       | 123211190 | 123211810 | -247                 |
| Galnt2        | NM_139272               | chr8       | 126754876 | 126755216 | -247                 |

**Supplemental Table 4. Significant ChIP-seq E2F3B promoter peaks (+/- 2kb from the TSS)**

| Gene Symbol | Refseq Transcript ID | Chromosome | Start     | End       | distance from TSS |
|-------------|----------------------|------------|-----------|-----------|-------------------|
| Syncrip     | NM_019796            | chr9       | 88377330  | 88377632  | -247              |
| Myo9a       | NM_173018            | chr9       | 59598503  | 59598964  | -247              |
| Ddit3       | NM_001290183         | chr10      | 126727363 | 126727841 | -246              |
| Lrrc58      | NM_177093            | chr16      | 37868061  | 37868417  | -246              |
| Smarcd1     | NM_031842            | chr15      | 99532283  | 99532660  | -246              |
| Lhx2        | NM_010710            | chr2       | 38206397  | 38206767  | -245              |
| Ypel5       | NM_027166            | chr17      | 73185635  | 73185962  | -245              |
| Dynll1      | NM_019682            | chr5       | 115751007 | 115751476 | -244              |
| Sec61a2     | NM_021305            | chr2       | 5816427   | 5816853   | -242              |
| Zmat1       | NM_175446            | chrX       | 131543873 | 131544105 | -242              |
| Tmub2       | NM_028076            | chr11      | 102145827 | 102146238 | -242              |
| Ndc80       | NM_023294            | chr17      | 71876082  | 71876793  | -242              |
| Fam20c      | NM_030565            | chr5       | 139230627 | 139230958 | -242              |
| Stag1       | NM_009282            | chr9       | 100543368 | 100544231 | -242              |
| Mex3c       | NM_001039214         | chr18      | 73731823  | 73732411  | -241              |
| Pds5b       | NM_175310            | chr5       | 151475845 | 151476475 | -241              |
| Ets1        | NM_001038642         | chr9       | 32503117  | 32503653  | -241              |
| Gps2        | NM_019726            | chr11      | 69727229  | 69727676  | -241              |
| Git1        | NM_001004144         | chr11      | 77306549  | 77306796  | -241              |
| Slc35b2     | NM_028662            | chr17      | 45700713  | 45701007  | -240              |
| Foxo3       | NM_019740            | chr10      | 41996648  | 41996923  | -239              |
| Baz1b       | NM_011714            | chr5       | 135662427 | 135663480 | -239              |
| Vps13a      | NM_173028            | chr19      | 16855530  | 16855790  | -238              |
| Pias3       | NM_001165949         | chr3       | 96500603  | 96500918  | -238              |
| Lgals1      | NM_008495            | chr15      | 78756669  | 78757166  | -237              |
| Tfcp2       | NM_001289603         | chr15      | 100382528 | 100382820 | -236              |
| Atxn1l      | NM_001080930         | chr8       | 112261683 | 112262063 | -235              |
| Sept7       | NM_009859            | chr9       | 25059577  | 25060031  | -235              |
| Bcl2l11     | NM_001284410         | chr2       | 127952899 | 127953252 | -235              |
| Tars        | NM_033074            | chr15      | 11329436  | 11329856  | -234              |
| Ing4        | NM_133345            | chr6       | 124989387 | 124989876 | -234              |
| Rnf19a      | NM_013923            | chr15      | 36212944  | 36213324  | -233              |
| Ssfa2       | NM_080558            | chr2       | 79475175  | 79475522  | -233              |
| Tspan17     | NM_028841            | chr13      | 54890356  | 54890710  | -232              |
| Pvrl3       | NM_021496            | chr16      | 46497044  | 46497578  | -232              |
| Hey2        | NM_013904            | chr10      | 30562563  | 30563075  | -231              |
| Tgfbr1      | NM_009370            | chr4       | 47365796  | 47366095  | -231              |
| Cstf3       | NM_145529            | chr2       | 104430117 | 104430703 | -230              |
| Gabpa       | NM_008065            | chr16      | 84834983  | 84835294  | -230              |
| Synj2       | NM_001113353         | chr17      | 5940867   | 5941232   | -230              |
| Hnrnp1      | NM_177301            | chr7       | 29595366  | 29595991  | -230              |
| Cdc20b      | NM_001281487         | chr13      | 113825183 | 113825531 | -229              |
| Arhgap35    | NM_172739            | chr7       | 17200283  | 17200856  | -229              |
| Ssbp2       | NM_024186            | chr13      | 91600245  | 91600701  | -228              |
| Hnrnpul1    | NM_144922            | chr7       | 26539638  | 26540293  | -228              |
| Rplp1       | NM_018853            | chr9       | 61762317  | 61762770  | -228              |
| Cbfa2t2     | NM_009823            | chr2       | 154261834 | 154262151 | -227              |
| Sh3rf1      | NM_021506            | chr8       | 63702475  | 63703006  | -227              |

**Supplemental Table 4. Significant ChIP-seq E2F3B promoter peaks  
(+/- 2kb from the TSS)**

| Gene Symbol   | Refseq<br>Transcript ID | Chromosome | Start     | End       | distance<br>from TSS |
|---------------|-------------------------|------------|-----------|-----------|----------------------|
| Ptk2          | NM_007982               | chr15      | 73253681  | 73254009  | -225                 |
| Cd47          | NM_010581               | chr16      | 49855330  | 49855753  | -225                 |
| Ddr1          | NM_001198833            | chr17      | 35837626  | 35837890  | -224                 |
| Scmh1         | NM_013883               | chr4       | 120077522 | 120077802 | -223                 |
| Ppp2r5e       | NM_012024               | chr12      | 76697191  | 76697626  | -223                 |
| Epb4.1        | NM_001128606            | chr4       | 131604942 | 131605487 | -223                 |
| Pgk1          | NM_008828               | chrX       | 103382099 | 103382332 | -223                 |
| Acp2          | NM_007387               | chr2       | 91042639  | 91043053  | -222                 |
| Mtf1          | NM_008636               | chr4       | 124479306 | 124479834 | -222                 |
| Capzb         | NM_001037761            | chr4       | 138748376 | 138748806 | -222                 |
| Hexim1        | NM_138753               | chr11      | 102977255 | 102977578 | -222                 |
| Naa10         | NM_019870               | chrX       | 71167285  | 71167722  | -222                 |
| Mir199b       | NR_029811               | chr2       | 32173506  | 32174011  | -221                 |
| Prkaca        | NM_008854               | chr8       | 86496545  | 86496766  | -221                 |
| Kmt2a         | NM_001081049            | chr9       | 44689278  | 44689875  | -221                 |
| Tex30         | NM_029368               | chr1       | 44159329  | 44159575  | -220                 |
| Spop          | NM_025287               | chr11      | 95274881  | 95275471  | -220                 |
| Ppp1r18       | NM_001146710            | chr17      | 36002564  | 36003140  | -220                 |
| Nadk2         | NM_001286255            | chr15      | 9000513   | 9001064   | -220                 |
| Atf2          | NM_001284374            | chr2       | 73730723  | 73731106  | -220                 |
| Mapk3         | NM_011952               | chr7       | 133902765 | 133903075 | -219                 |
| Srsf2         | NM_011358               | chr11      | 116714312 | 116714939 | -219                 |
| 1700113A16Rik | NR_045997               | chr3       | 87981802  | 87982047  | -219                 |
| Btbd7         | NM_172806               | chr12      | 104116670 | 104116994 | -217                 |
| Insig1        | NM_153526               | chr5       | 28397461  | 28398007  | -217                 |
| Fam60a        | NM_019643               | chr6       | 148895007 | 148895332 | -217                 |
| Tbl2          | NM_013763               | chr5       | 135625070 | 135625658 | -216                 |
| Sqle          | NM_009270               | chr15      | 59146222  | 59146639  | -216                 |
| Ubqln4        | NM_033526               | chr3       | 88357223  | 88357620  | -216                 |
| Cstf2t        | NM_031249               | chr19      | 31156896  | 31157334  | -215                 |
| Stt3a         | NM_008408               | chr9       | 36575142  | 36575610  | -214                 |
| Anp32e        | NM_001253758            | chr3       | 95732634  | 95733298  | -213                 |
| Tomm70a       | NM_138599               | chr16      | 57121427  | 57121800  | -213                 |
| Plec          | NM_201393               | chr15      | 76028649  | 76029051  | -212                 |
| Hist1h3g      | NM_145073               | chr13      | 23626846  | 23627303  | -212                 |
| Pabpc1        | NM_008774               | chr15      | 36538625  | 36539252  | -212                 |
| Azin1         | NM_018745               | chr15      | 38448851  | 38449612  | -212                 |
| Gclm          | NM_008129               | chr3       | 121948094 | 121948431 | -212                 |
| Wdr1          | NM_011715               | chr5       | 38952751  | 38953338  | -212                 |
| Mast4         | NM_175171               | chr13      | 104124507 | 104125057 | -211                 |
| Pisd-ps2      | NR_003519               | chr17      | 3084011   | 3084775   | -211                 |
| Tbx3          | NM_198052               | chr5       | 120120429 | 120120889 | -211                 |
| Meis1         | NM_010789               | chr11      | 18919024  | 18919339  | -211                 |
| Ado           | NM_001005419            | chr10      | 67011595  | 67012229  | -210                 |
| Ccne1         | NM_007633               | chr7       | 38892281  | 38893155  | -210                 |
| Cdc37         | NM_016742               | chr9       | 20954398  | 20954716  | -208                 |
| Bag6          | NM_057171               | chr17      | 35271652  | 35272177  | -208                 |
| Cenpb         | NM_007682               | chr2       | 131005857 | 131006052 | -208                 |



**Supplemental Table 4. Significant ChIP-seq E2F3B promoter peaks  
(+/- 2kb from the TSS)**

| Gene Symbol   | Refseq<br>Transcript ID | Chromosome | Start     | End       | distance<br>from TSS |
|---------------|-------------------------|------------|-----------|-----------|----------------------|
| Tmem65        | NM_175212               | chr15      | 58654963  | 58655412  | -207                 |
| Zdhhc12       | NM_025428               | chr2       | 29949079  | 29949641  | -206                 |
| G3bp2         | NM_011816               | chr5       | 92512789  | 92513142  | -206                 |
| Fam46b        | NM_175307               | chr4       | 133035588 | 133036096 | -205                 |
| Fam193a       | NM_001243123            | chr5       | 34712133  | 34712620  | -205                 |
| Cdkn3         | NM_028222               | chr14      | 47379833  | 47380189  | -204                 |
| Chaf1a        | NM_013733               | chr17      | 56179389  | 56179879  | -204                 |
| Tbc1d10a      | NM_134023               | chr11      | 4086482   | 4086781   | -204                 |
| Arf6          | NM_007481               | chr12      | 70472583  | 70473282  | -204                 |
| Ccnt1         | NM_009833               | chr15      | 98398112  | 98398427  | -204                 |
| Rab8a         | NM_023126               | chr8       | 74684649  | 74685140  | -204                 |
| Nup85         | NM_001002929            | chr11      | 115425211 | 115425897 | -203                 |
| Herpud1       | NM_022331               | chr8       | 96909966  | 96910427  | -203                 |
| Plxna3        | NM_008883               | chrX       | 71574043  | 71574360  | -203                 |
| Cep152        | NM_001081091            | chr2       | 125450796 | 125451304 | -202                 |
| Eil           | NM_007924               | chr8       | 73063102  | 73063640  | -202                 |
| Tmcc1         | NM_177412               | chr6       | 116143413 | 116143770 | -201                 |
| Caprin2       | NM_181541               | chr6       | 148844662 | 148845033 | -201                 |
| Rcl1          | NM_021525               | chr19      | 29175441  | 29175887  | -200                 |
| Hspa8         | NM_031165               | chr9       | 40608850  | 40609460  | -200                 |
| 4632415L05Rik | NR_027985               | chr3       | 19794540  | 19794801  | -200                 |
| Ncs1          | NM_019681               | chr2       | 31101007  | 31101479  | -199                 |
| Khsrp         | NM_010613               | chr17      | 57170793  | 57171460  | -198                 |
| Htatsf1       | NM_028242               | chrX       | 54306336  | 54306761  | -198                 |
| Eif4ebp2      | NM_010124               | chr10      | 60915483  | 60915742  | -197                 |
| Gm15941       | NR_045283               | chr15      | 37362364  | 37362865  | -197                 |
| Kank2         | NM_145611               | chr9       | 21602953  | 21603418  | -197                 |
| Troap         | NM_001162506            | chr15      | 98904885  | 98905530  | -196                 |
| Pias4         | NM_021501               | chr10      | 80630523  | 80630795  | -195                 |
| Mterfd1       | NM_025547               | chr13      | 67033985  | 67034419  | -195                 |
| Paqr4         | NM_023824               | chr17      | 23877251  | 23877731  | -195                 |
| Scamp3        | NM_011886               | chr3       | 88981071  | 88981352  | -195                 |
| Btbd8         | NM_001255991            | chr5       | 107866597 | 107867045 | -194                 |
| Irs1          | NM_010570               | chr1       | 82288039  | 82288372  | -193                 |
| Tmem109       | NM_134142               | chr19      | 10956181  | 10956666  | -192                 |
| Micu1         | NM_001291442            | chr10      | 59164878  | 59165360  | -191                 |
| Lrig2         | NM_001025067            | chr3       | 104315786 | 104316152 | -191                 |
| Larp4b        | NM_172585               | chr13      | 9092688   | 9093231   | -191                 |
| 2810408I11Rik | NR_038009               | chr1       | 64737311  | 64737533  | -190                 |
| Stx11         | NM_029075               | chr10      | 12684078  | 12684428  | -189                 |
| Amd1          | NM_009665               | chr10      | 40021976  | 40022388  | -189                 |
| Siva1         | NM_001161737            | chr12      | 113882453 | 113883245 | -189                 |
| lppk          | NM_199056               | chr13      | 49516126  | 49516678  | -189                 |
| Hbegf         | NM_010415               | chr18      | 36675458  | 36675836  | -189                 |
| H2afx         | NM_010436               | chr9       | 44142362  | 44142854  | -189                 |
| Ndufa6        | NM_025987               | chr15      | 82184760  | 82185057  | -189                 |
| Acn9          | NM_001077713            | chr6       | 6905628   | 6906029   | -189                 |
| Cep41         | NM_031998               | chr6       | 30643745  | 30643994  | -189                 |

**Supplemental Table 4. Significant ChIP-seq E2F3B promoter peaks  
(+/- 2kb from the TSS)**

| Gene Symbol   | Refseq<br>Transcript ID | Chromosome | Start     | End       | distance<br>from TSS |
|---------------|-------------------------|------------|-----------|-----------|----------------------|
| Mapk14        | NM_011951               | chr17      | 28827717  | 28828479  | -188                 |
| Zfp689        | NM_175163               | chr7       | 134592652 | 134593066 | -188                 |
| Cnot8         | NM_026949               | chr11      | 57917305  | 57917628  | -188                 |
| Canx          | NM_001110500            | chr11      | 50139086  | 50139636  | -187                 |
| Upf2          | NM_001081132            | chr2       | 5872146   | 5872508   | -187                 |
| Oaf           | NM_178644               | chr9       | 43047898  | 43048272  | -187                 |
| Uap1          | NM_133806               | chr1       | 172105039 | 172105486 | -187                 |
| Chchd7        | NR_104355               | chr4       | 3865668   | 3866028   | -186                 |
| Plekha1       | NM_133942               | chr7       | 138009078 | 138009396 | -186                 |
| Nop58         | NM_018868               | chr1       | 59741451  | 59741876  | -186                 |
| Rpl18a        | NM_029751               | chr8       | 73421427  | 73421626  | -186                 |
| Katnal1       | NM_153572               | chr5       | 149740141 | 149740673 | -185                 |
| Dpy19l1       | NM_172920               | chr9       | 24307672  | 24307864  | -185                 |
| Cggbp1        | NM_178647               | chr16      | 64851594  | 64851857  | -185                 |
| Stx4a         | NM_009294               | chr7       | 134984952 | 134985321 | -185                 |
| Tnrc6c        | NM_198022               | chr11      | 117515273 | 117515563 | -184                 |
| Ift27         | NM_025931               | chr15      | 78004421  | 78005021  | -184                 |
| Plcl2         | NM_013880               | chr17      | 50648526  | 50648848  | -184                 |
| Gna11         | NM_010301               | chr10      | 81007809  | 81008138  | -184                 |
| Fam208a       | NM_028945               | chr14      | 28241574  | 28242123  | -184                 |
| H2afv         | NM_029938               | chr11      | 6344175   | 6345081   | -183                 |
| Col5a1        | NM_015734               | chr2       | 27741511  | 27742011  | -183                 |
| Supt4a        | NM_009296               | chr11      | 87550659  | 87551108  | -183                 |
| Gpr116        | NM_001081178            | chr17      | 43526088  | 43526375  | -183                 |
| Dnajb4        | NM_027287               | chr3       | 151873036 | 151873421 | -183                 |
| Pσμα1         | NM_011965               | chr7       | 121419661 | 121419961 | -182                 |
| Tsc22d1       | NM_009366               | chr14      | 76903899  | 76904370  | -182                 |
| Cdca7         | NM_025866               | chr2       | 72313691  | 72314496  | -182                 |
| Ccnl1         | NM_019937               | chr3       | 65762101  | 65762554  | -182                 |
| Gltп          | NM_019821               | chr5       | 115141008 | 115141240 | -181                 |
| 1810043G02Rik | NM_026431               | chr10      | 77441015  | 77441413  | -180                 |
| Oip5          | NM_001042653            | chr2       | 119444080 | 119444760 | -180                 |
| Ficd          | NM_001010825            | chr5       | 114185507 | 114185713 | -180                 |
| Tshz3         | NM_172298               | chr7       | 37482725  | 37483188  | -180                 |
| Armc9         | NM_030184               | chr1       | 88050975  | 88051376  | -179                 |
| Fdft1         | NM_010191               | chr14      | 63796677  | 63796937  | -178                 |
| Alg10b        | NM_001033441            | chr15      | 90054387  | 90054739  | -178                 |
| Tfdp1         | NM_001291765            | chr8       | 13338387  | 13338757  | -178                 |
| Nucks1        | NM_001145804            | chr1       | 133806527 | 133807186 | -178                 |
| Khdrbs1       | NR_045036               | chr4       | 129419560 | 129419885 | -177                 |
| Srsf4         | NM_020587               | chr4       | 131429187 | 131429566 | -177                 |
| Depdc5        | NM_001025426            | chr5       | 33205952  | 33206435  | -176                 |
| Tab2          | NM_138667               | chr10      | 7675977   | 7676213   | -175                 |
| Sgcd          | NM_011891               | chr11      | 47192693  | 47193262  | -175                 |
| Stx12         | NM_133887               | chr4       | 132440283 | 132440810 | -175                 |
| Lysmd3        | NM_030257               | chr13      | 81796437  | 81796823  | -174                 |
| Cacnb2        | NM_023116               | chr2       | 14525490  | 14526027  | -174                 |
| Avpi1         | NM_027106               | chr19      | 42203376  | 42203934  | -173                 |

**Supplemental Table 4. Significant ChIP-seq E2F3B promoter peaks  
(+/- 2kb from the TSS)**

| Gene Symbol   | Refseq<br>Transcript ID | Chromosome | Start     | End       | distance<br>from TSS |
|---------------|-------------------------|------------|-----------|-----------|----------------------|
| Gbp111        | NM_029868               | chr4       | 116229966 | 116230350 | -173                 |
| Cnot6         | NM_212484               | chr11      | 49526170  | 49526621  | -173                 |
| Mir484        | NR_030252               | chr16      | 14159181  | 14159910  | -173                 |
| Ptpra         | NM_008980               | chr2       | 130275622 | 130276060 | -172                 |
| Hnrnpd        | NM_007516               | chr5       | 100407884 | 100408372 | -172                 |
| 1810026B05Rik | NR_037569               | chr7       | 80703275  | 80703629  | -172                 |
| Mprrip        | NM_012027               | chr11      | 59475622  | 59476027  | -172                 |
| Pebp1         | NM_018858               | chr5       | 117737602 | 117737885 | -172                 |
| 2210018M11Rik | NM_172280               | chr7       | 105805028 | 105805470 | -171                 |
| Nudt3         | NM_019837               | chr17      | 27760329  | 27760804  | -171                 |
| Gemin8        | NM_146238               | chrX       | 162608088 | 162608393 | -171                 |
| Slc25a27      | NM_028711               | chr17      | 43803918  | 43804348  | -170                 |
| Med6          | NM_027213               | chr12      | 82695871  | 82696356  | -170                 |
| Hist1h4a      | NM_178192               | chr13      | 23853016  | 23853557  | -170                 |
| Tor1aip2      | NM_172843               | chr1       | 157882401 | 157882847 | -169                 |
| Rnf126        | NM_144528               | chr10      | 79229663  | 79230067  | -169                 |
| Slc39a9       | NM_026244               | chr12      | 81744770  | 81745294  | -169                 |
| Rbm39         | NM_001291114            | chr2       | 156005844 | 156006440 | -169                 |
| Dhx34         | NM_027883               | chr7       | 16807382  | 16807716  | -169                 |
| Sgsm2         | NM_197943               | chr11      | 74710631  | 74710867  | -168                 |
| Nckap5l       | NM_001001884            | chr15      | 99288144  | 99288548  | -168                 |
| Fytd1         | NM_027226               | chr16      | 32877485  | 32877919  | -167                 |
| Polr2h        | NM_145632               | chr16      | 20717616  | 20717847  | -167                 |
| Slc35e3       | NM_029875               | chr10      | 117183416 | 117183742 | -166                 |
| Pank3         | NM_145962               | chr11      | 35582704  | 35582956  | -166                 |
| Ulk4          | NM_177589               | chr9       | 121186199 | 121186711 | -166                 |
| Ostm1         | NM_172416               | chr10      | 42398290  | 42398821  | -166                 |
| Isy1          | NM_133934               | chr6       | 87788564  | 87789269  | -165                 |
| Sertad3       | NM_133210               | chr7       | 28258558  | 28258829  | -165                 |
| Adipor1       | NM_028320               | chr1       | 136311688 | 136312070 | -164                 |
| Plekhh3       | NM_146030               | chr11      | 101032540 | 101033018 | -164                 |
| Prep          | NM_011156               | chr10      | 44786670  | 44787041  | -164                 |
| Safb2         | NM_001029979            | chr17      | 56723783  | 56724554  | -164                 |
| Dcaf4         | NM_030246               | chr12      | 84861079  | 84861425  | -163                 |
| Inf2          | NM_198411               | chr12      | 113826587 | 113827075 | -163                 |
| Nmt2          | NM_001290370            | chr2       | 3201118   | 3201523   | -163                 |
| Ift140        | NM_134126               | chr17      | 25152614  | 25153122  | -162                 |
| Megf9         | NM_172694               | chr4       | 70195892  | 70196354  | -162                 |
| Ubr4          | NM_001160319            | chr4       | 138936197 | 138936625 | -162                 |
| Nme2          | NM_001077529            | chr11      | 93817094  | 93817421  | -162                 |
| Actn1         | NM_134156               | chr12      | 81361294  | 81361741  | -161                 |
| Capn7         | NM_009796               | chr14      | 32149573  | 32149924  | -161                 |
| Sh3gl1        | NM_013664               | chr17      | 56175955  | 56176483  | -160                 |
| Adss          | NM_007422               | chr1       | 179726583 | 179727014 | -160                 |
| Prkca         | NM_011101               | chr11      | 108205200 | 108205521 | -160                 |
| Zfyve1        | NM_183154               | chr12      | 84938030  | 84938481  | -160                 |
| Mtx1          | NM_001161824            | chr3       | 89018200  | 89018631  | -160                 |
| Phactr4       | NM_001161797            | chr4       | 131978258 | 131978780 | -159                 |

**Supplemental Table 4. Significant ChIP-seq E2F3B promoter peaks  
(+/- 2kb from the TSS)**

| Gene Symbol   | Refseq<br>Transcript ID | Chromosome | Start     | End       | distance<br>from TSS |
|---------------|-------------------------|------------|-----------|-----------|----------------------|
| Csrp2         | NM_007792               | chr10      | 110356814 | 110357332 | -158                 |
| Ttll5         | NM_001081423            | chr12      | 87165501  | 87165981  | -158                 |
| Trerf1        | NM_001097623            | chr17      | 47277616  | 47277848  | -158                 |
| Hdac1         | NM_008228               | chr4       | 129219877 | 129220217 | -158                 |
| Nop56         | NM_024193               | chr2       | 130099649 | 130100330 | -158                 |
| Cltb          | NM_028870               | chr13      | 54712583  | 54712995  | -157                 |
| C330013E15Rik | NR_045701               | chr15      | 100445484 | 100445910 | -157                 |
| Yap1          | NM_001171147            | chr9       | 8004536   | 8004968   | -157                 |
| Uvssa         | NM_001081101            | chr5       | 33720969  | 33721406  | -157                 |
| Nfatc2ip      | NM_010900               | chr7       | 133540282 | 133540531 | -157                 |
| Cdc42bpb      | NM_183016               | chr12      | 112615918 | 112616250 | -156                 |
| Msh3          | NM_010829               | chr13      | 93124857  | 93125369  | -156                 |
| Sept11        | NM_001009818            | chr5       | 93522058  | 93522594  | -156                 |
| Wtap          | NM_175394               | chr17      | 13185374  | 13185745  | -156                 |
| Kcnab2        | NM_010598               | chr4       | 151851552 | 151852073 | -156                 |
| Utp3          | NM_023054               | chr5       | 88982971  | 88983732  | -156                 |
| Chsy1         | NM_001081163            | chr7       | 73254050  | 73254439  | -156                 |
| Pias1         | NM_019663               | chr9       | 62828631  | 62829050  | -156                 |
| Fam207a       | NM_133998               | chr10      | 76978545  | 76978879  | -155                 |
| 9130023H24Rik | NM_177001               | chr7       | 135381534 | 135381864 | -155                 |
| U2af1         | NM_024187               | chr17      | 31795484  | 31796221  | -155                 |
| Ncor2         | NM_001253904            | chr5       | 125659554 | 125659921 | -155                 |
| Prr14l        | NM_194340               | chr5       | 33196874  | 33197190  | -154                 |
| Kras          | NM_021284               | chr6       | 145198745 | 145199063 | -154                 |
| Edf1          | NM_021519               | chr2       | 25413078  | 25413453  | -154                 |
| Acsl1         | NM_007981               | chr8       | 47556039  | 47556444  | -154                 |
| Fam76b        | NM_176836               | chr9       | 13631736  | 13632297  | -154                 |
| Cdca4         | NM_028023               | chr12      | 114067546 | 114067958 | -153                 |
| Agpat4        | NM_026644               | chr17      | 12311858  | 12312134  | -153                 |
| Ube2k         | NM_016786               | chr5       | 65928161  | 65928531  | -153                 |
| Slc9a8        | NM_148929               | chr2       | 167246851 | 167247284 | -153                 |
| Npat          | NM_001081152            | chr9       | 53344602  | 53345395  | -153                 |
| Smad3         | NM_016769               | chr9       | 63605666  | 63606239  | -153                 |
| 1700012D14Rik | NR_015573               | chr7       | 118266230 | 118266450 | -152                 |
| Traf3ip1      | NM_028718               | chr1       | 93390860  | 93391325  | -152                 |
| Ust           | NM_177387               | chr10      | 8238593   | 8238954   | -152                 |
| Ptpn21        | NM_011877               | chr12      | 99972759  | 99973252  | -152                 |
| Dscr3         | NM_007834               | chr16      | 94747932  | 94748840  | -151                 |
| Scaf1         | NM_001008422            | chr7       | 52271573  | 52271965  | -151                 |
| Rhou          | NM_133955               | chr8       | 126177526 | 126177828 | -151                 |
| Gtpbp2        | NM_019581               | chr17      | 46297619  | 46298040  | -151                 |
| Cers6         | NM_172856               | chr2       | 68699317  | 68699609  | -150                 |
| 4831440E17Rik | NR_030700               | chr5       | 25005304  | 25005624  | -150                 |
| Letmd1        | NM_134093               | chr15      | 100299164 | 100299465 | -150                 |
| Brms1l        | NM_001037756            | chr12      | 56936864  | 56937542  | -149                 |
| Maml1d1       | NM_001256048            | chrX       | 68303153  | 68303410  | -149                 |
| Wdr19         | NM_153391               | chr5       | 65590605  | 65590967  | -148                 |
| Xpot          | NM_001081056            | chr10      | 121063345 | 121063691 | -147                 |

**Supplemental Table 4. Significant ChIP-seq E2F3B promoter peaks (+/- 2kb from the TSS)**

| Gene Symbol   | Refseq Transcript ID | Chromosome | Start     | End       | distance from TSS |
|---------------|----------------------|------------|-----------|-----------|-------------------|
| Pgp           | NM_025954            | chr17      | 24607111  | 24607429  | -147              |
| Dazap1        | NM_001122604         | chr10      | 79727331  | 79727846  | -147              |
| Phf12         | NM_174852            | chr11      | 77796059  | 77796282  | -147              |
| Rrs1          | NM_021511            | chr1       | 9535148   | 9535536   | -146              |
| Creb1         | NM_133828            | chr1       | 64579090  | 64579373  | -146              |
| Snx18         | NM_130796            | chr13      | 114408747 | 114409086 | -146              |
| Metrn         | NM_133719            | chr17      | 25934022  | 25934247  | -146              |
| Mmp17         | NM_011846            | chr5       | 130089785 | 130090100 | -146              |
| Pcna          | NM_011045            | chr2       | 132078831 | 132079288 | -145              |
| Tsn           | NM_011650            | chr1       | 120207759 | 120207945 | -144              |
| Slc35e1       | NM_177766            | chr8       | 75016479  | 75016833  | -144              |
| Foxn2         | NM_180974            | chr17      | 88839593  | 88840222  | -144              |
| Smc4          | NM_133786            | chr3       | 68808365  | 68809134  | -144              |
| Hist2h4       | NM_033596            | chr3       | 96067073  | 96067692  | -144              |
| Tmem120a      | NM_172541            | chr5       | 136220020 | 136220349 | -144              |
| Gm15545       | NR_045266            | chr7       | 52241973  | 52242278  | -144              |
| Hnrnpab       | NM_010448            | chr11      | 51420342  | 51420708  | -143              |
| Zc3h15        | NM_026934            | chr2       | 83484414  | 83484768  | -143              |
| Ehd4          | NM_133838            | chr2       | 119980250 | 119980656 | -143              |
| Tbc1d2        | NM_198664            | chr4       | 46663018  | 46663408  | -143              |
| Lrrc51        | NM_001162973         | chr7       | 109082258 | 109082768 | -143              |
| Ap2b1         | NM_001035854         | chr11      | 83115880  | 83116232  | -142              |
| Kif11         | NM_010615            | chr19      | 37450566  | 37450934  | -142              |
| Mrfap1        | NM_026242            | chr5       | 37187975  | 37188293  | -142              |
| Stard3nl      | NM_024270            | chr13      | 19487601  | 19487922  | -142              |
| Ddx23         | NM_001080981         | chr15      | 98493241  | 98493680  | -142              |
| Nmt1          | NM_008707            | chr11      | 102889555 | 102889913 | -141              |
| Ppwd1         | NM_172807            | chr13      | 105018892 | 105019236 | -141              |
| Pars2         | NM_001285783         | chr4       | 106323303 | 106323761 | -141              |
| D230025D16Rik | NM_145604            | chr8       | 107748776 | 107749116 | -141              |
| Epg5          | NM_001195633         | chr18      | 78134878  | 78135251  | -141              |
| Mtap          | NM_024433            | chr4       | 88782919  | 88783346  | -141              |
| Mycbp         | NM_019660            | chr4       | 123581935 | 123582294 | -141              |
| Atxn2l        | NM_183020            | chr7       | 133646667 | 133647244 | -141              |
| Idh3a         | NM_029573            | chr9       | 54433994  | 54434359  | -141              |
| C920006O11Rik | NR_040401            | chr9       | 78023403  | 78023756  | -141              |
| Phf23         | NM_030064            | chr11      | 69808939  | 69809315  | -140              |
| Nfyc          | NM_001277095         | chr4       | 120498274 | 120498696 | -140              |
| Hist1h2af     | NM_175661            | chr13      | 23625454  | 23625825  | -140              |
| Hnrnpa3       | NM_198090            | chr2       | 75496788  | 75497563  | -140              |
| Leprot        | NM_175036            | chr4       | 101320073 | 101320422 | -140              |
| Morn1         | NM_001081100         | chr4       | 154460242 | 154460849 | -140              |
| Gnb2          | NM_010312            | chr5       | 137974335 | 137974856 | -140              |
| Aamp          | NM_001190444         | chr1       | 74331183  | 74331717  | -139              |
| Klf16         | NM_078477            | chr10      | 80039989  | 80040368  | -139              |
| Parp11        | NM_181402            | chr6       | 127403387 | 127403816 | -139              |
| Abhd17a       | NM_145421            | chr10      | 80052980  | 80053465  | -138              |
| Zfp598        | NM_183149            | chr17      | 24806433  | 24806684  | -138              |

**Supplemental Table 4. Significant ChIP-seq E2F3B promoter peaks  
(+/- 2kb from the TSS)**

| Gene Symbol   | Refseq<br>Transcript ID | Chromosome | Start     | End       | distance<br>from TSS |
|---------------|-------------------------|------------|-----------|-----------|----------------------|
| Mir8112       | NR_106192               | chr6       | 71221413  | 71221640  | -138                 |
| Lemd3         | NM_001081193            | chr10      | 120416214 | 120416830 | -137                 |
| 2500004C02Rik | NR_040318               | chr2       | 153171523 | 153171841 | -137                 |
| Ppp1r16a      | NM_033371               | chr15      | 76501704  | 76502241  | -137                 |
| Runx1         | NM_001111023            | chr16      | 92697578  | 92697841  | -137                 |
| Arhgef7       | NM_017402               | chr8       | 11758013  | 11758372  | -137                 |
| Wwp2          | NM_025830               | chr8       | 109959988 | 109960333 | -137                 |
| 0610009B22Rik | NM_025319               | chr11      | 51502089  | 51502453  | -136                 |
| Pcnp          | NM_001024622            | chr16      | 56029777  | 56030153  | -136                 |
| Ubc           | NM_019639               | chr5       | 125870280 | 125870764 | -136                 |
| Tyw1          | NM_001015876            | chr5       | 130732591 | 130732949 | -136                 |
| Ints1         | NM_026748               | chr5       | 140251589 | 140251945 | -136                 |
| Phlpp1        | NM_133821               | chr1       | 108068135 | 108068484 | -136                 |
| Wdpcp         | NM_145425               | chr11      | 21471801  | 21472494  | -136                 |
| Hmgn1         | NM_008251               | chr16      | 96349199  | 96349734  | -136                 |
| Psmc4         | NM_011874               | chr7       | 28835051  | 28835439  | -135                 |
| Bard1         | NM_007525               | chr1       | 71149442  | 71149917  | -135                 |
| Tmpo          | NM_001080129            | chr10      | 90634244  | 90634751  | -135                 |
| Pa2g4         | NM_011119               | chr10      | 128002903 | 128003344 | -135                 |
| Gpr180        | NM_021434               | chr14      | 118536044 | 118536383 | -135                 |
| BC031361      | NR_033221               | chr16      | 38089242  | 38089717  | -135                 |
| Diap1         | NM_007858               | chr18      | 38095090  | 38095307  | -135                 |
| Bclaf1        | NM_153787               | chr10      | 20031914  | 20032366  | -134                 |
| Taok1         | NM_144825               | chr11      | 77421326  | 77421574  | -134                 |
| Obfc1         | NM_175360               | chr19      | 47611470  | 47611816  | -134                 |
| Mapk1ip1l     | NM_178684               | chr14      | 47917666  | 47918043  | -134                 |
| Fam111a       | NM_026640               | chr19      | 12647676  | 12648085  | -134                 |
| Mid1ip1       | NM_026524               | chrX       | 10294198  | 10294515  | -134                 |
| Sumo1         | NM_009460               | chr1       | 59727604  | 59728016  | -133                 |
| Gtf2a1        | NM_175335               | chr12      | 92828853  | 92829265  | -133                 |
| Ap5m1         | NM_144535               | chr14      | 49685802  | 49686270  | -133                 |
| Arc           | NM_018790               | chr15      | 74503001  | 74503263  | -133                 |
| Mir3960       | NR_039536               | chr2       | 32568451  | 32568797  | -133                 |
| Mmp16         | NM_019724               | chr4       | 17780328  | 17780662  | -133                 |
| Arl4a         | NM_007487               | chr12      | 40763878  | 40764311  | -133                 |
| Elmo2         | NM_207706               | chr2       | 165151884 | 165152337 | -133                 |
| E2f8          | NM_001013368            | chr7       | 56136267  | 56136818  | -133                 |
| BC003331      | NM_001077237            | chr1       | 152240109 | 152240523 | -132                 |
| Camk2n2       | NM_028420               | chr16      | 20621269  | 20621695  | -132                 |
| Ugp2          | NM_001290634            | chr11      | 21271251  | 21271549  | -131                 |
| Ptms          | NM_026988               | chr6       | 124867965 | 124868223 | -131                 |
| Cebpa         | NM_007678               | chr7       | 35904013  | 35904347  | -131                 |
| Hist1h4f      | NM_175655               | chr13      | 23643475  | 23643807  | -130                 |
| Lrr1          | NM_001081406            | chr12      | 70269365  | 70269976  | -130                 |
| Usp8          | NM_019729               | chr2       | 126532825 | 126533042 | -130                 |
| Cep250        | NM_001130000            | chr2       | 155781824 | 155782503 | -130                 |
| Ing1          | NM_011919               | chr8       | 11555760  | 11556111  | -130                 |
| Prkar2a       | NM_008924               | chr9       | 108594183 | 108594505 | -129                 |

**Supplemental Table 4. Significant ChIP-seq E2F3B promoter peaks  
(+/- 2kb from the TSS)**

| Gene Symbol   | Refseq<br>Transcript ID | Chromosome | Start     | End       | distance<br>from TSS |
|---------------|-------------------------|------------|-----------|-----------|----------------------|
| Fdps          | NM_134469               | chr3       | 88905690  | 88906343  | -129                 |
| Srsf10        | NM_001284196            | chr4       | 135411600 | 135412113 | -129                 |
| Lbr           | NM_133815               | chr1       | 183772418 | 183772900 | -128                 |
| Harbi1        | NM_178724               | chr2       | 91550799  | 91551157  | -128                 |
| Ogfr          | NM_031373               | chr2       | 180323798 | 180324168 | -128                 |
| Nfx1          | NM_001290449            | chr4       | 40917649  | 40917971  | -128                 |
| Mier2         | NM_027422               | chr10      | 79017781  | 79018144  | -128                 |
| Atf4          | NM_009716               | chr15      | 80085180  | 80085791  | -128                 |
| Atl2          | NM_178050               | chr17      | 80295297  | 80295882  | -128                 |
| Kdm3a         | NM_001038695            | chr6       | 71582610  | 71583465  | -128                 |
| Ing2          | NM_023503               | chr8       | 48760483  | 48760796  | -128                 |
| Pld2          | NM_008876               | chr11      | 70353397  | 70353679  | -127                 |
| Banp          | NM_016812               | chr8       | 124473984 | 124474544 | -127                 |
| Txn2          | NM_019913               | chr15      | 77759295  | 77759804  | -127                 |
| A430005L14Rik | NM_175287               | chr4       | 153330926 | 153331511 | -127                 |
| Polr2j        | NM_011293               | chr5       | 136592205 | 136592662 | -127                 |
| Eepd1         | NM_026189               | chr9       | 25288872  | 25289237  | -127                 |
| Dcp2          | NM_027490               | chr18      | 44539900  | 44540154  | -126                 |
| Ralgapb       | NM_001291138            | chr2       | 158235354 | 158235570 | -126                 |
| Lsm14b        | NM_177727               | chr2       | 179759317 | 179759813 | -126                 |
| Hipk1         | NM_010432               | chr3       | 103595135 | 103595511 | -126                 |
| Usp30         | NM_001033202            | chr5       | 114550051 | 114550379 | -126                 |
| Wapal         | NM_001004436            | chr14      | 35486757  | 35487218  | -126                 |
| Ltn1          | NM_001081068            | chr16      | 87432656  | 87433295  | -126                 |
| Spcs3         | NM_029701               | chr8       | 55615226  | 55615725  | -126                 |
| Gnb2l1        | NM_008143               | chr11      | 48613554  | 48613918  | -125                 |
| Rbm14-rbm4    | NM_001290127            | chr19      | 4811593   | 4811923   | -125                 |
| Fam129b       | NM_146119               | chr2       | 32731266  | 32731790  | -125                 |
| Map3k7        | NM_172688               | chr4       | 32050767  | 32051145  | -125                 |
| Gins2         | NM_178856               | chr8       | 123112874 | 123113324 | -125                 |
| Polr2m        | NM_178602               | chr9       | 71333655  | 71334173  | -125                 |
| Snopc2        | NM_133968               | chr8       | 4252775   | 4253178   | -125                 |
| Ywhae         | NM_009536               | chr11      | 75546097  | 75546431  | -124                 |
| Slc15a4       | NM_133895               | chr5       | 128097667 | 128098103 | -124                 |
| Crebzf        | NM_145151               | chr7       | 97590936  | 97591396  | -124                 |
| Atf6          | NM_001081304            | chr1       | 172797878 | 172798170 | -123                 |
| Pomt2         | NM_153415               | chr12      | 88488834  | 88489114  | -123                 |
| Ppp1cc        | NM_013636               | chr5       | 122607964 | 122608364 | -123                 |
| Hist1h2an     | NM_178184               | chr13      | 21879052  | 21879365  | -123                 |
| Nup214        | NM_172268               | chr2       | 31829524  | 31830169  | -123                 |
| Psip1         | NM_133948               | chr4       | 83132225  | 83132722  | -123                 |
| Mex3b         | NM_175366               | chr7       | 90015521  | 90015918  | -123                 |
| Mto1          | NM_026658               | chr9       | 78295689  | 78296098  | -123                 |
| Tbc1d8b       | NM_001081499            | chrX       | 136219169 | 136219654 | -123                 |
| Ascc2         | NM_029291               | chr11      | 4537507   | 4537840   | -122                 |
| Adam17        | NM_001291871            | chr12      | 21379461  | 21379766  | -122                 |
| Cenpj         | NM_001014996            | chr14      | 57190634  | 57190973  | -122                 |
| Dis3l         | NM_172519               | chr9       | 64188176  | 64188593  | -122                 |

**Supplemental Table 4. Significant ChIP-seq E2F3B promoter peaks (+/- 2kb from the TSS)**

| Gene Symbol   | Refseq Transcript ID | Chromosome | Start     | End       | distance from TSS |
|---------------|----------------------|------------|-----------|-----------|-------------------|
| Pcdh9         | NM_001271798         | chr14      | 94289853  | 94290163  | -121              |
| Tex9          | NM_009359            | chr9       | 72339619  | 72340153  | -121              |
| H3f3a         | NM_008210            | chr1       | 182743662 | 182744045 | -121              |
| Birc6         | NM_007566            | chr17      | 74927144  | 74927883  | -121              |
| Fndc3b        | NM_173182            | chr3       | 27609243  | 27609718  | -121              |
| Ankrd10       | NR_030781            | chr8       | 11634970  | 11635341  | -121              |
| Tmem164       | NM_001199357         | chrX       | 139115654 | 139115989 | -121              |
| Xpnpep3       | NM_177310            | chr15      | 81230328  | 81230666  | -120              |
| Pemt          | NM_001290012         | chr11      | 59859933  | 59860286  | -120              |
| Farp1         | NM_134082            | chr14      | 121434470 | 121434881 | -120              |
| Ppia          | NM_008907            | chr11      | 6315548   | 6315958   | -119              |
| Ccnj          | NM_172839            | chr19      | 40905514  | 40905785  | -119              |
| Wdr77         | NM_027432            | chr3       | 105762190 | 105762403 | -119              |
| Rgp1          | NM_172866            | chr4       | 43591349  | 43591626  | -119              |
| Srrm1         | NM_001130477         | chr4       | 134908907 | 134909586 | -119              |
| Relt          | NM_177073            | chr7       | 108011945 | 108012144 | -119              |
| Tcf12         | NM_001253865         | chr9       | 71959554  | 71959933  | -119              |
| Acy1          | NM_001276442         | chr9       | 106340492 | 106340877 | -119              |
| Slc16a10      | NM_001114332         | chr10      | 39862011  | 39862343  | -118              |
| Dnajc14       | NM_028873            | chr10      | 128242405 | 128242821 | -118              |
| Wdr20         | NM_027149            | chr12      | 111975896 | 111976184 | -118              |
| Rrp7a         | NM_029101            | chr15      | 82953158  | 82953538  | -118              |
| Slc30a9       | NM_178651            | chr5       | 67697906  | 67698248  | -118              |
| Zfp628        | NM_170759            | chr7       | 4866528   | 4866872   | -118              |
| Tmx1          | NM_028339            | chr12      | 71553842  | 71554203  | -118              |
| Wrb           | NM_207301            | chr16      | 96366636  | 96367179  | -118              |
| Dusp1         | NM_013642            | chr17      | 26645020  | 26646047  | -118              |
| Wwc2          | NM_133791            | chr8       | 49075878  | 49076165  | -118              |
| Fam203a       | NM_021555            | chr15      | 76199043  | 76199377  | -117              |
| Slc39a13      | NM_026721            | chr2       | 90910297  | 90910879  | -117              |
| Zw10          | NM_012039            | chr9       | 48863239  | 48863897  | -117              |
| Tfb2m         | NM_008249            | chr1       | 181476395 | 181476632 | -117              |
| Rmnd1         | NM_025343            | chr10      | 5913819   | 5914324   | -117              |
| Rbl1          | NM_011249            | chr2       | 157029967 | 157030804 | -117              |
| Rpgrip1l      | NM_173431            | chr8       | 93837073  | 93837400  | -117              |
| Dido1         | NM_175551            | chr2       | 180436634 | 180437210 | -116              |
| H2afz         | NM_016750            | chr3       | 137527089 | 137527579 | -116              |
| Rpl29         | NM_009082            | chr9       | 106331516 | 106331990 | -116              |
| Sptan1        | NM_001177667         | chr2       | 29820798  | 29821129  | -116              |
| Xylt1         | NM_175645            | chr7       | 124524205 | 124524548 | -116              |
| 2410006H16Rik | NR_030738            | chr11      | 62415898  | 62416628  | -115              |
| Sf1           | NM_001110791         | chr19      | 6363321   | 6363827   | -115              |
| Scaf4         | NM_178923            | chr16      | 90284570  | 90284997  | -115              |
| Txn1l         | NM_016792            | chr18      | 63851903  | 63852350  | -115              |
| Rad23b        | NM_009011            | chr4       | 55362430  | 55363167  | -115              |
| Arl4c         | NM_177305            | chr1       | 90598639  | 90599118  | -114              |
| Frk           | NM_010237            | chr10      | 34202912  | 34203271  | -114              |
| Map2k2        | NM_023138            | chr10      | 80568348  | 80568807  | -114              |



**Supplemental Table 4. Significant ChIP-seq E2F3B promoter peaks  
(+/- 2kb from the TSS)**

| Gene Symbol   | Refseq<br>Transcript ID | Chromosome | Start     | End       | distance<br>from TSS |
|---------------|-------------------------|------------|-----------|-----------|----------------------|
| Scrib         | NM_134089               | chr15      | 75900107  | 75900438  | -114                 |
| Zfp318        | NM_207671               | chr17      | 46520365  | 46520836  | -114                 |
| Cds2          | NM_138651               | chr2       | 132088642 | 132088897 | -114                 |
| Adrm1         | NM_019822               | chr2       | 179905974 | 179906383 | -114                 |
| Ost4          | NM_001134692            | chr5       | 31210030  | 31210517  | -114                 |
| Mboat1        | NM_153546               | chr13      | 30228088  | 30228402  | -113                 |
| Ddx56         | NM_026538               | chr11      | 6167728   | 6167958   | -112                 |
| Gemin7        | NM_027189               | chr7       | 20158702  | 20158904  | -112                 |
| Trib2         | NM_144551               | chr12      | 15823438  | 15823965  | -112                 |
| Tbc1d24       | NM_001163848            | chr17      | 24342394  | 24342841  | -112                 |
| Pkn2          | NM_178654               | chr3       | 142544890 | 142545267 | -112                 |
| Por           | NM_008898               | chr5       | 136164829 | 136165114 | -112                 |
| Zfp169        | NM_001164576            | chr13      | 48608698  | 48609132  | -111                 |
| Foxo1         | NM_019739               | chr3       | 52071977  | 52072317  | -111                 |
| Pitpnb        | NM_019640               | chr5       | 111759454 | 111759888 | -111                 |
| Casp2         | NM_007610               | chr6       | 42214577  | 42215275  | -111                 |
| C430049B03Rik | NR_038185               | chrX       | 50410324  | 50410630  | -111                 |
| Kdsr          | NM_027534               | chr1       | 108656215 | 108656642 | -111                 |
| Esyt1         | NM_011843               | chr10      | 127962846 | 127963203 | -111                 |
| Sept9         | NM_001113487            | chr11      | 117127332 | 117127565 | -111                 |
| Tnfaip8l1     | NM_025566               | chr17      | 56301636  | 56301969  | -111                 |
| Wdfy3         | NM_172882               | chr5       | 102498876 | 102499223 | -111                 |
| Chst2         | NM_018763               | chr9       | 95307537  | 95308060  | -111                 |
| Col6a3        | NM_001243009            | chr1       | 92740487  | 92740827  | -110                 |
| Snx3          | NM_017472               | chr10      | 42221573  | 42221925  | -110                 |
| Rabggtb       | NM_001163478            | chr3       | 153575834 | 153576244 | -110                 |
| Eya3          | NM_210071               | chr4       | 132194678 | 132195022 | -110                 |
| Etfa          | NM_145615               | chr9       | 55359943  | 55360375  | -110                 |
| Ctdsp1        | NM_153088               | chr1       | 74437861  | 74438284  | -110                 |
| Rangap1       | NM_001146174            | chr15      | 81560124  | 81560791  | -110                 |
| Cdip1         | NM_025670               | chr16      | 4789748   | 4790339   | -110                 |
| Atp7b         | NM_007511               | chr8       | 23170517  | 23170792  | -110                 |
| Figl1         | NM_001163359            | chr11      | 11708769  | 11709377  | -109                 |
| Baiap2        | NM_001037755            | chr11      | 119804070 | 119804522 | -109                 |
| Gstz1         | NM_001252555            | chr12      | 88487742  | 88488268  | -109                 |
| Ccno          | NM_001081062            | chr13      | 113777632 | 113778168 | -109                 |
| Kansl2        | NM_001289439            | chr15      | 98364585  | 98365031  | -109                 |
| Fra10ac1      | NM_001081075            | chr19      | 38298583  | 38298877  | -109                 |
| Ppm1g         | NM_008014               | chr5       | 31522746  | 31523306  | -109                 |
| Znrf2         | NM_199143               | chr6       | 54766693  | 54766907  | -109                 |
| Mcm3          | NM_008563               | chr1       | 20810205  | 20810598  | -109                 |
| Mapk7         | NM_001291035            | chr11      | 61307593  | 61308158  | -109                 |
| Cks2          | NM_025415               | chr13      | 51740304  | 51740679  | -109                 |
| Ldb1          | NM_001113408            | chr19      | 46119660  | 46119957  | -109                 |
| Hspb11        | NM_028394               | chr4       | 106926191 | 106926668 | -109                 |
| Slit2         | NM_001291227            | chr5       | 48374143  | 48374426  | -109                 |
| Luc7l2        | NM_001170848            | chr6       | 38501136  | 38501533  | -109                 |
| Mtmr14        | NM_026849               | chr6       | 113187572 | 113187883 | -109                 |

**Supplemental Table 4. Significant ChIP-seq E2F3B promoter peaks  
(+/- 2kb from the TSS)**

| <b>Gene Symbol</b> | <b>Refseq<br/>Transcript ID</b> | <b>Chromosome</b> | <b>Start</b> | <b>End</b> | <b>distance<br/>from TSS</b> |
|--------------------|---------------------------------|-------------------|--------------|------------|------------------------------|
| ErbB2              | NM_001003817                    | chr11             | 98273491     | 98273887   | -108                         |
| Arhgef40           | NM_001145921                    | chr14             | 52604278     | 52604520   | -108                         |
| Mapkapk5           | NM_010765                       | chr5              | 121995864    | 121996152  | -108                         |
| Athl1              | NM_145387                       | chr7              | 148127199    | 148127543  | -108                         |
| Irx5               | NM_018826                       | chr8              | 94881340     | 94881832   | -108                         |
| Mir1941            | NR_035462                       | chr15             | 101199538    | 101199811  | -108                         |
| Ppib               | NM_011149                       | chr9              | 65907689     | 65908046   | -108                         |
| Map2               | NM_008632                       | chr1              | 66221643     | 66221947   | -107                         |
| Zfp706             | NM_026521                       | chr15             | 36936936     | 36937590   | -107                         |
| Slc3a2             | NM_008577                       | chr19             | 8788316      | 8788670    | -107                         |
| Zfp868             | NM_001045553                    | chr8              | 72148922     | 72149438   | -107                         |
| Hist1h3c           | NM_175653                       | chr13             | 23837384     | 23837607   | -107                         |
| Tial1              | NM_009383                       | chr7              | 135604864    | 135605401  | -107                         |
| Cpne2              | NM_153507                       | chr8              | 97056692     | 97056949   | -107                         |
| Dock11             | NM_001009947                    | chrX              | 33428517     | 33428922   | -107                         |
| Zdhhc5             | NM_144887                       | chr2              | 84555287     | 84555565   | -106                         |
| Chac1              | NM_026929                       | chr2              | 119176683    | 119177059  | -106                         |
| Nelfa              | NM_011914                       | chr5              | 34278791     | 34279233   | -106                         |
| Mki67              | NM_001081117                    | chr7              | 142907880    | 142908454  | -106                         |
| Irf1               | NM_001159393                    | chr11             | 53583197     | 53583622   | -106                         |
| Samd4              | NM_001037221                    | chr14             | 47502326     | 47502741   | -106                         |
| Pdcd10             | NM_019745                       | chr3              | 75360676     | 75361081   | -106                         |
| Srm                | NM_009272                       | chr4              | 147965306    | 147965725  | -106                         |
| Mdm2               | NM_001288586                    | chr10             | 117147746    | 117148090  | -105                         |
| Dgkz               | NM_138306                       | chr2              | 91803676     | 91803972   | -105                         |
| Eri3               | NM_001285901                    | chr4              | 117222671    | 117222975  | -105                         |
| Rad9b              | NM_144912                       | chr5              | 122804086    | 122804530  | -105                         |
| Ints10             | NM_001293791                    | chr8              | 71317547     | 71317897   | -105                         |
| Serbp1             | NM_001113564                    | chr6              | 67216674     | 67217061   | -105                         |
| Sgk1               | NM_011361                       | chr10             | 21714021     | 21714713   | -104                         |
| Mtmr4              | NM_133215                       | chr11             | 87405347     | 87405881   | -104                         |
| Maml3              | NM_001004176                    | chr3              | 51908834     | 51909228   | -104                         |
| Ubqln2             | NM_018798                       | chrX              | 149932502    | 149932838  | -104                         |
| Kpna3              | NM_008466                       | chr14             | 62058558     | 62059215   | -104                         |
| Cobll1             | NM_027225                       | chr2              | 65076571     | 65077000   | -104                         |
| Ung                | NM_011677                       | chr5              | 114580576    | 114581545  | -104                         |
| Dnmt1              | NM_001199433                    | chr9              | 20756720     | 20757619   | -104                         |
| Gtf2b              | NM_145546                       | chr3              | 142427972    | 142428242  | -103                         |
| Cpe                | NM_013494                       | chr8              | 67171770     | 67172108   | -103                         |
| HnrnpII            | NM_144802                       | chr17             | 80461474     | 80461945   | -103                         |
| Orc4               | NR_033442                       | chr2              | 48804666     | 48805111   | -103                         |
| Ddost              | NM_007838                       | chr4              | 137860364    | 137860735  | -103                         |
| Fbxo21             | NM_145564                       | chr5              | 118426452    | 118426899  | -103                         |
| Msmo1              | NM_025436                       | chr8              | 67212307     | 67212646   | -103                         |
| Zc3h6              | NM_178404                       | chr2              | 128792716    | 128793354  | -102                         |
| Adora2b            | NM_007413                       | chr11             | 62062221     | 62062546   | -102                         |
| Prickle1           | NM_001033217                    | chr15             | 93426247     | 93426598   | -102                         |
| Fbxo45             | NM_173439                       | chr16             | 32247034     | 32247389   | -102                         |

**Supplemental Table 4. Significant ChIP-seq E2F3B promoter peaks  
(+/- 2kb from the TSS)**

| Gene Symbol   | Refseq<br>Transcript ID | Chromosome | Start     | End       | distance<br>from TSS |
|---------------|-------------------------|------------|-----------|-----------|----------------------|
| Ephb6         | NM_001146351            | chr6       | 41555117  | 41555640  | -102                 |
| Cenpt         | NM_177150               | chr8       | 108375852 | 108376165 | -102                 |
| Peak1         | NM_172924               | chr9       | 56265791  | 56266124  | -102                 |
| A830080D01Rik | NM_001033472            | chrX       | 155970307 | 155970688 | -102                 |
| Matr3         | NM_010771               | chr18      | 35721448  | 35721972  | -101                 |
| Gcn111        | NM_172719               | chr5       | 116015010 | 116015330 | -101                 |
| Snx8          | NM_172277               | chr5       | 140865075 | 140865527 | -101                 |
| Pcid2         | NM_178708               | chr8       | 13105205  | 13105681  | -101                 |
| Ap1g1         | NM_009677               | chr8       | 112302296 | 112302580 | -101                 |
| Asf1b         | NM_024184               | chr8       | 86479168  | 86479815  | -101                 |
| Fkbp5         | NM_010220               | chr17      | 28623049  | 28623337  | -100                 |
| Notch2        | NM_010928               | chr3       | 97817186  | 97817534  | -100                 |
| Stxbp3a       | NM_011504               | chr3       | 108643399 | 108643639 | -100                 |
| Pcbp1         | NM_011865               | chr6       | 86476110  | 86476406  | -100                 |
| Uba52         | NM_019883               | chr8       | 73034213  | 73034517  | -100                 |
| R3hcc1l       | NM_177464               | chr19      | 42593008  | 42593382  | -99                  |
| Slc25a5       | NM_007451               | chrX       | 34335406  | 34335688  | -99                  |
| Psap          | NM_001146123            | chr10      | 59740138  | 59740415  | -99                  |
| Nos1ap        | NM_001109985            | chr1       | 172519928 | 172520226 | -98                  |
| Ptrhd1        | NM_001204912            | chr12      | 4233774   | 4234082   | -98                  |
| Rrn3          | NM_001039521            | chr16      | 13780483  | 13780903  | -98                  |
| Vprbp         | NM_001015507            | chr9       | 106723901 | 106724515 | -98                  |
| Mroh1         | NM_175457               | chr15      | 76210696  | 76210993  | -98                  |
| Metap1        | NM_175224               | chr3       | 138152264 | 138152621 | -98                  |
| Snx14         | NM_172926               | chr9       | 88333705  | 88334066  | -98                  |
| Cdk1          | NM_007659               | chr10      | 68815479  | 68816033  | -97                  |
| Dtnbp1        | NM_025772               | chr13      | 45097418  | 45097704  | -97                  |
| Zfand2a       | NM_001159908            | chr5       | 139960269 | 139960813 | -97                  |
| Fam13b        | NM_146084               | chr18      | 34666387  | 34666758  | -97                  |
| Phf20         | NM_172674               | chr2       | 156022065 | 156022506 | -97                  |
| Calu          | NM_184053               | chr6       | 29297743  | 29298274  | -97                  |
| Ppp2cb        | NM_017374               | chr8       | 34709844  | 34710147  | -97                  |
| Fyn           | NM_008054               | chr10      | 39089286  | 39089730  | -96                  |
| Tfdp2         | NM_001184706            | chr9       | 96096449  | 96096745  | -96                  |
| Plec          | NM_201394               | chr15      | 76026008  | 76026461  | -96                  |
| Gpr3          | NM_008154               | chr4       | 132768406 | 132768685 | -96                  |
| Ccnc          | NM_001290420            | chr4       | 21654664  | 21654840  | -95                  |
| Fgfr3         | NM_001163215            | chr5       | 34064073  | 34064481  | -95                  |
| Pom121        | NM_148932               | chr5       | 135870352 | 135870668 | -95                  |
| Cops8         | NM_133805               | chr1       | 92499770  | 92500039  | -95                  |
| 4732491K20Rik | NR_045290               | chr17      | 12511449  | 12511798  | -95                  |
| Itgb3bp       | NM_026348               | chr4       | 99495601  | 99496204  | -95                  |
| Nsmce1        | NM_026330               | chr7       | 132634875 | 132635424 | -95                  |
| Cdk10         | NM_194446               | chr8       | 125748475 | 125748816 | -95                  |
| Mdm1          | NM_148922               | chr10      | 117578553 | 117578943 | -94                  |
| Mcm4          | NM_008565               | chr16      | 15637103  | 15638069  | -94                  |
| Uhrf2         | NM_144873               | chr19      | 30104687  | 30105129  | -94                  |
| Ccdc91        | NM_025911               | chr6       | 147424109 | 147424487 | -94                  |

**Supplemental Table 4. Significant ChIP-seq E2F3B promoter peaks  
(+/- 2kb from the TSS)**

| Gene Symbol   | Refseq<br>Transcript ID | Chromosome | Start     | End       | distance<br>from TSS |
|---------------|-------------------------|------------|-----------|-----------|----------------------|
| Whsc11        | NM_001001735            | chr8       | 26712538  | 26712828  | -94                  |
| Ddhd2         | NM_028102               | chr8       | 26864528  | 26865162  | -94                  |
| Uchl5         | NM_001159866            | chr1       | 145624104 | 145624523 | -94                  |
| Zc3h18        | NM_001029994            | chr8       | 124900174 | 124900669 | -94                  |
| Ldha          | NM_010699               | chr7       | 54100917  | 54101243  | -93                  |
| Fhod1         | NM_177699               | chr8       | 107871730 | 107872194 | -93                  |
| Ubap2l        | NM_001165984            | chr3       | 89856324  | 89856733  | -93                  |
| Fbxo10        | NM_001024142            | chr4       | 45097408  | 45097727  | -93                  |
| Mrps17        | NM_025450               | chr5       | 130221174 | 130221445 | -93                  |
| Trim24        | NM_001272064            | chr6       | 37820445  | 37820990  | -93                  |
| Zfp382        | NM_001081007            | chr7       | 30906612  | 30907135  | -93                  |
| Tssc4         | NM_138631               | chr7       | 150254897 | 150255462 | -93                  |
| Ash2l         | NM_011791               | chr8       | 26951122  | 26951579  | -93                  |
| Hmgxb4        | NM_178017               | chr8       | 77517358  | 77517659  | -93                  |
| Cox8a         | NM_007750               | chr19      | 7292018   | 7292376   | -92                  |
| Eprs          | NM_029735               | chr1       | 187186606 | 187187157 | -92                  |
| Mcm3ap        | NM_019434               | chr10      | 75931481  | 75931766  | -92                  |
| Prkci         | NM_008857               | chr3       | 30894310  | 30894891  | -92                  |
| Mad1l1        | NM_010752               | chr5       | 140797300 | 140797893 | -92                  |
| Hdgfrp3       | NM_013886               | chr7       | 89079208  | 89079663  | -92                  |
| Fasn          | NM_007988               | chr11      | 120685723 | 120686179 | -91                  |
| Epha7         | NM_001290434            | chr4       | 28739985  | 28740393  | -91                  |
| Nop2          | NM_138747               | chr6       | 125081678 | 125081940 | -91                  |
| Eif4a2        | NM_001123038            | chr16      | 23107238  | 23107661  | -91                  |
| Rps20         | NM_026147               | chr4       | 3762679   | 3762994   | -91                  |
| Capn2         | NM_009794               | chr1       | 184447385 | 184448021 | -90                  |
| Inpp5e        | NM_033134               | chr2       | 26264682  | 26264974  | -90                  |
| Gmeb2         | NM_198169               | chr2       | 181022614 | 181022906 | -90                  |
| Chd9          | NM_177224               | chr8       | 93352523  | 93352763  | -90                  |
| 4930581F22Rik | NR_029475               | chr9       | 34923972  | 34924472  | -90                  |
| Rbm3os        | NR_033561               | chrX       | 7722223   | 7722701   | -90                  |
| Nt5m          | NM_134029               | chr11      | 59661314  | 59661655  | -90                  |
| Mycn          | NM_008709               | chr12      | 12948529  | 12948932  | -90                  |
| Rfwd3         | NM_146218               | chr8       | 113823953 | 113824468 | -90                  |
| P4hb          | NM_011032               | chr11      | 120434119 | 120434557 | -89                  |
| Dnajb1        | NM_018808               | chr8       | 86131733  | 86132235  | -89                  |
| Hbp1          | NM_153198               | chr12      | 32635369  | 32635606  | -89                  |
| E2f3          | NM_010093               | chr13      | 30077768  | 30078271  | -89                  |
| Itpr1         | NM_010585               | chr6       | 108162821 | 108163180 | -89                  |
| Alg12         | NM_001142357            | chr15      | 88649493  | 88650177  | -88                  |
| 1110037F02Rik | NM_001081183            | chr4       | 11412700  | 11413332  | -88                  |
| Rassf1        | NM_001243748            | chr9       | 107453588 | 107454006 | -88                  |
| lpmk          | NM_027184               | chr10      | 70810308  | 70810597  | -88                  |
| Wdhd1         | NM_172598               | chr14      | 47896379  | 47896858  | -88                  |
| Cd2bp2        | NM_001285905            | chr7       | 134339567 | 134339788 | -88                  |
| Ttll4         | NM_001014974            | chr1       | 74708006  | 74708474  | -87                  |
| Slc25a29      | NM_181328               | chr12      | 110073974 | 110074370 | -87                  |
| Fam122a       | NM_026520               | chr19      | 24551895  | 24552205  | -87                  |

**Supplemental Table 4. Significant ChIP-seq E2F3B promoter peaks (+/- 2kb from the TSS)**

| Gene Symbol   | Refseq Transcript ID | Chromosome | Start     | End       | distance from TSS |
|---------------|----------------------|------------|-----------|-----------|-------------------|
| Mafb          | NM_010658            | chr2       | 160192727 | 160193047 | -87               |
| Rdx           | NM_009041            | chr9       | 51855803  | 51856113  | -87               |
| Sos1          | NM_009231            | chr17      | 80879660  | 80880097  | -87               |
| Mageb3        | NM_008545            | chr2       | 121781360 | 121782467 | -87               |
| Map1lc3a      | NM_025735            | chr2       | 155101727 | 155102298 | -87               |
| Wee1          | NM_009516            | chr7       | 117265258 | 117265713 | -87               |
| Dlc1          | NM_015802            | chr8       | 37676882  | 37677282  | -86               |
| Wdr48         | NM_026236            | chr9       | 119803795 | 119804057 | -86               |
| Snhg7         | NR_024068            | chr2       | 26495725  | 26495972  | -86               |
| Mrpl20        | NM_025570            | chr4       | 155177537 | 155177744 | -86               |
| Usp38         | NM_027554            | chr8       | 83538674  | 83539105  | -86               |
| Nfyb          | NM_010914            | chr10      | 82226750  | 82227190  | -85               |
| Rad50         | NM_009012            | chr11      | 53520715  | 53521095  | -85               |
| Top2a         | NM_011623            | chr11      | 98885395  | 98885779  | -85               |
| lfrd1         | NM_013562            | chr12      | 40949682  | 40950038  | -85               |
| Scfd1         | NM_029825            | chr12      | 52478350  | 52478612  | -85               |
| Ttf1          | NM_009442            | chr2       | 28915534  | 28915860  | -85               |
| Iqgap3        | NM_001033484         | chr3       | 87885644  | 87886130  | -85               |
| Phlda3        | NM_013750            | chr1       | 137662336 | 137662817 | -85               |
| Arl1          | NM_025859            | chr10      | 88193840  | 88194307  | -85               |
| Lrrc41        | NM_153521            | chr4       | 115747828 | 115748141 | -85               |
| Med23         | NM_027347            | chr10      | 24589530  | 24589884  | -84               |
| Cdc6          | NM_001025779         | chr11      | 98768833  | 98769403  | -84               |
| Tcf19         | NM_001163764         | chr17      | 35653432  | 35654272  | -84               |
| Cbx3          | NM_007624            | chr6       | 51420310  | 51420750  | -84               |
| Icosl         | NM_015790            | chr10      | 77531807  | 77532250  | -84               |
| Rrm2          | NM_009104            | chr12      | 25392816  | 25393253  | -84               |
| Akap11        | NM_001164503         | chr14      | 78936503  | 78936996  | -84               |
| Lrrk2         | NM_025730            | chr15      | 91503379  | 91503762  | -84               |
| Tctn3         | NM_026260            | chr19      | 40686565  | 40687010  | -84               |
| Dpy19l3       | NM_178704            | chr7       | 36539420  | 36539691  | -84               |
| Id1           | NM_010495            | chr2       | 152561743 | 152562063 | -83               |
| Diap2         | NM_172493            | chrX       | 126284073 | 126284315 | -83               |
| 1810062O18Rik | NR_033571            | chr14      | 21365259  | 21365604  | -83               |
| Zfp1          | NM_024231            | chr19      | 6084730   | 6085215   | -83               |
| Stard7        | NM_139308            | chr2       | 127095623 | 127096140 | -83               |
| Tmem201       | NM_001284270         | chr4       | 149111982 | 149112535 | -83               |
| lft46         | NM_023831            | chr9       | 44580864  | 44581153  | -83               |
| Cep131        | NM_009734            | chr11      | 119948088 | 119948356 | -82               |
| H2-DMa        | NM_010386            | chr17      | 34259462  | 34259926  | -82               |
| Ccna2         | NM_009828            | chr3       | 36470670  | 36471328  | -82               |
| Dancr         | NR_015531            | chr5       | 74488850  | 74489200  | -82               |
| Cltc          | NM_001003908         | chr11      | 86570868  | 86571281  | -82               |
| Igf2r         | NM_010515            | chr17      | 12962500  | 12962805  | -82               |
| Cebpg         | NM_009884            | chr7       | 35841476  | 35841855  | -82               |
| Mrc2          | NM_008626            | chr11      | 105153730 | 105154026 | -81               |
| Rps6ka5       | NM_153587            | chr12      | 101963121 | 101963515 | -81               |
| Haus4         | NM_145462            | chr14      | 55173082  | 55173474  | -81               |

**Supplemental Table 4. Significant ChIP-seq E2F3B promoter peaks  
(+/- 2kb from the TSS)**

| Gene Symbol   | Refseq<br>Transcript ID | Chromosome | Start     | End       | distance<br>from TSS |
|---------------|-------------------------|------------|-----------|-----------|----------------------|
| Pdcp          | NM_020271               | chr15      | 78744120  | 78744414  | -81                  |
| Rps10         | NM_025963               | chr17      | 27772049  | 27772485  | -81                  |
| Ttf2          | NM_001013026            | chr3       | 100773493 | 100773839 | -81                  |
| AI314180      | NM_172381               | chr4       | 58925515  | 58925839  | -81                  |
| Jrk           | NM_008415               | chr15      | 74539620  | 74540043  | -81                  |
| Psmc9         | NM_013585               | chr17      | 34324214  | 34324495  | -81                  |
| Sgms1         | NM_144792               | chr19      | 32462736  | 32463311  | -81                  |
| H6pd          | NM_173371               | chr4       | 149382983 | 149383440 | -81                  |
| Polr2e        | NM_025554               | chr10      | 79502196  | 79502770  | -80                  |
| 1810014B01Rik | NR_015572               | chr10      | 86148060  | 86148322  | -80                  |
| Neurl4        | NM_001291118            | chr11      | 69715012  | 69715462  | -80                  |
| 9130401M01Rik | NM_029418               | chr15      | 57865716  | 57866140  | -80                  |
| Pskh1         | NM_173432               | chr8       | 108424045 | 108424541 | -80                  |
| Sf3b3         | NM_133953               | chr8       | 113370498 | 113371066 | -80                  |
| Cirbp         | NM_007705               | chr10      | 79630204  | 79630807  | -80                  |
| Pqlc1         | NM_001164422            | chr18      | 80452749  | 80453020  | -80                  |
| Drap1         | NM_001291080            | chr19      | 5424890   | 5425225   | -80                  |
| Tra2a         | NM_198102               | chr6       | 49213963  | 49214296  | -80                  |
| Lsm11         | NM_028185               | chr11      | 45758360  | 45758670  | -79                  |
| Mir5627       | NR_049203               | chr12      | 45311037  | 45311403  | -79                  |
| Elf1          | NM_007920               | chr14      | 79880582  | 79881260  | -79                  |
| Zfp90         | NM_011764               | chr8       | 108938891 | 108939427 | -79                  |
| Akap1         | NM_001042541            | chr11      | 88725734  | 88726221  | -79                  |
| Tra2b         | NM_009186               | chr16      | 22265788  | 22266371  | -79                  |
| Adam9         | NM_007404               | chr8       | 26127250  | 26127693  | -79                  |
| Bcar1         | NM_001198839            | chr8       | 114255935 | 114256292 | -79                  |
| Tigd5         | NM_178646               | chr15      | 75739917  | 75740255  | -78                  |
| Naa15         | NM_053089               | chr3       | 51219730  | 51219988  | -78                  |
| Rps11         | NM_013725               | chr7       | 52379608  | 52380064  | -78                  |
| Mum1          | NM_023431               | chr10      | 79688912  | 79689617  | -78                  |
| Ncapg2        | NM_133762               | chr12      | 117643495 | 117644098 | -78                  |
| Alms1         | NM_145223               | chr6       | 85537219  | 85537674  | -78                  |
| Timm50        | NM_025616               | chr7       | 29096971  | 29097312  | -78                  |
| Lin52         | NM_173756               | chr12      | 85792164  | 85792596  | -77                  |
| Nr6a1         | NM_010264               | chr2       | 38781890  | 38782224  | -77                  |
| Zfp664        | NM_001081750            | chr5       | 125342739 | 125343255 | -77                  |
| Mrps12        | NM_011885               | chr7       | 29526686  | 29527066  | -77                  |
| Cnot1         | NM_001205226            | chr8       | 98331141  | 98331735  | -77                  |
| Zbtb24        | NM_001277229            | chr10      | 41169926  | 41170247  | -77                  |
| D10Wsu102e    | NM_026579               | chr10      | 82822647  | 82823130  | -77                  |
| Osbpl8        | NM_175489               | chr10      | 110601508 | 110602053 | -77                  |
| Armc7         | NM_177778               | chr11      | 115336780 | 115337047 | -77                  |
| Dscc1         | NM_183089               | chr15      | 54921770  | 54922447  | -77                  |
| Ccdc96        | NM_025725               | chr5       | 36826965  | 36827354  | -77                  |
| Med14         | NM_001048208            | chrX       | 12338760  | 12339589  | -77                  |
| Vamp4         | NM_016796               | chr1       | 164500712 | 164501052 | -76                  |
| Ranbp2        | NM_011240               | chr10      | 57909292  | 57909754  | -76                  |
| Cdk2          | NM_016756               | chr10      | 128141874 | 128142490 | -76                  |

**Supplemental Table 4. Significant ChIP-seq E2F3B promoter peaks (+/- 2kb from the TSS)**

| Gene Symbol   | Refseq Transcript ID | Chromosome | Start     | End       | distance from TSS |
|---------------|----------------------|------------|-----------|-----------|-------------------|
| Ccdc134       | NM_172428            | chr15      | 81958022  | 81958528  | -76               |
| Pelo          | NM_134058            | chr13      | 115880249 | 115880632 | -76               |
| Ahdc1         | NM_146155            | chr4       | 132567204 | 132567485 | -76               |
| B330016D10Rik | NR_030695            | chr4       | 141101835 | 141102166 | -76               |
| Fam109a       | NM_175474            | chr5       | 122298807 | 122299114 | -76               |
| Cops6         | NM_012002            | chr5       | 138602091 | 138602416 | -76               |
| Commd9        | NM_029635            | chr2       | 101726199 | 101726487 | -75               |
| Nat10         | NM_153126            | chr2       | 103601298 | 103601664 | -75               |
| Ccp110        | NM_182995            | chr7       | 125855879 | 125856219 | -75               |
| Nckipsd       | NM_030729            | chr9       | 108710407 | 108710863 | -75               |
| Ipo9          | NM_153774            | chr1       | 137326909 | 137327374 | -75               |
| Mrps10        | NM_001146212         | chr17      | 47505632  | 47505889  | -75               |
| 4930577N17Rik | NR_073429            | chr3       | 51080498  | 51080717  | -75               |
| Zfp280d       | NM_146224            | chr9       | 72122411  | 72122850  | -75               |
| Nfkbiz        | NM_001159394         | chr16      | 55822198  | 55822450  | -74               |
| Efna3         | NM_010108            | chr3       | 89126740  | 89127008  | -74               |
| Ap5z1         | NM_172725            | chr5       | 142939465 | 142940155 | -74               |
| Suz12         | NM_001163018         | chr11      | 79806220  | 79806847  | -74               |
| Ppp1r21       | NM_028658            | chr17      | 88929214  | 88929565  | -74               |
| Coro1b        | NM_011778            | chr19      | 4148464   | 4148713   | -74               |
| Mtf2          | NM_013827            | chr5       | 108494397 | 108494840 | -74               |
| Alg8          | NM_199035            | chr7       | 104519927 | 104520178 | -74               |
| Cnot11        | NM_028043            | chr1       | 39592395  | 39592751  | -73               |
| Nedd1         | NM_008682            | chr10      | 92184980  | 92185490  | -73               |
| Smarcd2       | NM_001130187         | chr11      | 106134106 | 106134610 | -73               |
| Eif4a3        | NM_138669            | chr11      | 119161251 | 119161607 | -73               |
| Zfyve21       | NM_026752            | chr12      | 113051863 | 113052751 | -73               |
| Parp2         | NM_009632            | chr14      | 51427385  | 51427709  | -73               |
| Zfp142        | NM_029888            | chr1       | 74634190  | 74635157  | -73               |
| Tmpo          | NM_001283048         | chr10      | 90633126  | 90633607  | -73               |
| Lrig3         | NM_177152            | chr10      | 125402974 | 125403429 | -73               |
| Smpd4         | NM_001164610         | chr16      | 17619147  | 17619600  | -73               |
| Frs2          | NM_177798            | chr10      | 116585487 | 116585715 | -72               |
| Hist1h3b      | NM_178203            | chr13      | 23844021  | 23844331  | -72               |
| Pgrmc2        | NM_027558            | chr3       | 40886834  | 40887244  | -72               |
| Dctpp1        | NM_023203            | chr7       | 134404113 | 134404391 | -72               |
| Stt3b         | NM_024222            | chr9       | 115219283 | 115219937 | -72               |
| Tor1aip1      | NM_001160018         | chr1       | 157883555 | 157883806 | -72               |
| Mob3a         | NM_172457            | chr10      | 80164341  | 80164930  | -72               |
| BC048403      | NM_173022            | chr10      | 121176744 | 121177097 | -72               |
| 4930427A07Rik | NM_134041            | chr12      | 114394241 | 114394878 | -72               |
| B4galt7       | NM_146045            | chr13      | 55701260  | 55701539  | -72               |
| Sod1          | NM_011434            | chr16      | 90220719  | 90221110  | -72               |
| Nelfe         | NM_001045864         | chr17      | 34987134  | 34987393  | -72               |
| Casp8ap2      | NM_001122978         | chr4       | 32702094  | 32702657  | -72               |
| Smc2          | NM_008017            | chr4       | 52451871  | 52452226  | -72               |
| Bod1l         | NM_001081422         | chr5       | 42235403  | 42235846  | -72               |
| Rasa3         | NM_009025            | chr8       | 13677403  | 13677912  | -72               |

**Supplemental Table 4. Significant ChIP-seq E2F3B promoter peaks  
(+/- 2kb from the TSS)**

| Gene Symbol   | Refseq<br>Transcript ID | Chromosome | Start     | End       | distance<br>from TSS |
|---------------|-------------------------|------------|-----------|-----------|----------------------|
| Rnf7          | NM_011279               | chr9       | 96378959  | 96379210  | -72                  |
| Atp6ap1       | NM_018794               | chrX       | 71542192  | 71542535  | -72                  |
| Ercc6l        | NM_146235               | chrX       | 99352285  | 99352716  | -72                  |
| Npcd          | NM_001013362            | chr15      | 79664500  | 79665166  | -71                  |
| A930024E05Rik | NR_045820               | chr5       | 123439145 | 123439437 | -71                  |
| Mbd4          | NM_010774               | chr6       | 115803254 | 115803604 | -71                  |
| Ankrd26       | NM_001081112            | chr6       | 118512180 | 118512508 | -71                  |
| Traip         | NM_011634               | chr9       | 107853088 | 107853356 | -71                  |
| Agap1         | NM_001037136            | chr1       | 91351123  | 91351506  | -71                  |
| Marveld1      | NM_183195               | chr19      | 42221675  | 42221940  | -71                  |
| Prpf3         | NM_027541               | chr3       | 95659459  | 95660032  | -71                  |
| Cep70         | NM_023873               | chr9       | 99143603  | 99144028  | -71                  |
| Mcu           | NM_001033259            | chr10      | 59079307  | 59079711  | -70                  |
| A630020A06    | NR_045740               | chr15      | 3945685   | 3946251   | -70                  |
| Rab12         | NM_024448               | chr17      | 66868994  | 66869164  | -70                  |
| Zdhhc24       | NM_027476               | chr19      | 4878334   | 4878860   | -70                  |
| Sart1         | NM_016882               | chr19      | 5388655   | 5388889   | -70                  |
| Tmem248       | NM_027854               | chr5       | 130697944 | 130698324 | -70                  |
| Mutyh         | NM_133250               | chr4       | 116480011 | 116480526 | -70                  |
| Mepce         | NM_144913               | chr5       | 138227825 | 138228170 | -70                  |
| Herc2         | NM_010418               | chr7       | 63305246  | 63305663  | -70                  |
| Dcaf15        | NM_172502               | chr8       | 86628564  | 86628895  | -70                  |
| Topbp1        | NM_176979               | chr9       | 103207320 | 103207853 | -70                  |
| Ubald1        | NM_145359               | chr16      | 4879784   | 4880054   | -69                  |
| Msh2          | NM_008628               | chr17      | 88071670  | 88071984  | -69                  |
| 8030462N17Rik | NM_178670               | chr18      | 77952610  | 77953024  | -69                  |
| Rps3a1        | NM_016959               | chr3       | 85946368  | 85946948  | -69                  |
| Ppp6r1        | NM_172894               | chr7       | 4610503   | 4610737   | -69                  |
| Nup93         | NM_172410               | chr8       | 96738199  | 96738663  | -69                  |
| Cenpf         | NM_001081363            | chr1       | 191511852 | 191512213 | -69                  |
| Pofut1        | NM_080463               | chr2       | 153067032 | 153067365 | -69                  |
| Cdk5rap2      | NM_145990               | chr4       | 70071324  | 70071613  | -69                  |
| Acot7         | NM_133348               | chr4       | 151551863 | 151552416 | -69                  |
| Gde1          | NM_019580               | chr7       | 125849197 | 125849442 | -69                  |
| Plat          | NM_008872               | chr8       | 23867905  | 23868388  | -69                  |
| Ttc13         | NM_145607               | chr8       | 127245811 | 127246074 | -69                  |
| Sbno2         | NM_183426               | chr10      | 79565336  | 79565692  | -68                  |
| Dis3          | NM_028315               | chr14      | 99498856  | 99499256  | -68                  |
| Mrpl41        | NM_001031808            | chr2       | 24830517  | 24830853  | -68                  |
| Zfp661        | NM_028141               | chr2       | 127410331 | 127410629 | -68                  |
| Dpy19l4       | NM_001081201            | chr4       | 11249176  | 11249514  | -68                  |
| Rpa2          | NM_011284               | chr4       | 132323853 | 132324559 | -68                  |
| Rpl13a        | NM_009438               | chr7       | 52383939  | 52384425  | -68                  |
| Mbd3          | NM_013595               | chr10      | 79862116  | 79862465  | -68                  |
| Gm11974       | NR_045893               | chr11      | 6428687   | 6428972   | -68                  |
| Pwwp2a        | NM_001164231            | chr11      | 43495262  | 43495601  | -68                  |
| Mis12         | NM_025993               | chr11      | 70832755  | 70833334  | -68                  |
| lpo11         | NM_029665               | chr13      | 107726915 | 107727208 | -68                  |



**Supplemental Table 4. Significant ChIP-seq E2F3B promoter peaks  
(+/- 2kb from the TSS)**

| Gene Symbol   | Refseq<br>Transcript ID | Chromosome | Start     | End       | distance<br>from TSS |
|---------------|-------------------------|------------|-----------|-----------|----------------------|
| Rab26os       | NR_045289               | chr17      | 24664970  | 24665285  | -68                  |
| Hells         | NM_008234               | chr19      | 39005256  | 39005567  | -68                  |
| Rps27l        | NM_026467               | chr9       | 66793656  | 66794057  | -68                  |
| Josd1         | NM_028792               | chr15      | 79518055  | 79518681  | -67                  |
| 1600023N17Rik | NR_073433               | chr5       | 46060669  | 46061357  | -67                  |
| Opn3          | NM_010098               | chr1       | 177622640 | 177623017 | -67                  |
| Gm5129        | NR_028426               | chr5       | 30062421  | 30062662  | -67                  |
| Ssbp1         | NM_212468               | chr6       | 40421215  | 40421478  | -67                  |
| Hist1h4d      | NM_175654               | chr13      | 23673239  | 23673569  | -66                  |
| Cdh24         | NM_199470               | chr14      | 55260177  | 55260355  | -66                  |
| Slc25a32      | NM_172402               | chr15      | 38944045  | 38944609  | -66                  |
| Msh6          | NM_010830               | chr17      | 88373942  | 88374705  | -66                  |
| Dpysl3        | NM_001291455            | chr18      | 43597808  | 43598201  | -66                  |
| Dnaja1        | NM_008298               | chr4       | 40669309  | 40669560  | -66                  |
| Rnf38         | NM_001038993            | chr4       | 44181046  | 44181393  | -66                  |
| Map4          | NM_001205330            | chr9       | 109833900 | 109834523 | -66                  |
| Sbf1          | NM_001081030            | chr15      | 89145614  | 89145998  | -65                  |
| Lmbr1l        | NM_029098               | chr15      | 98748196  | 98748990  | -65                  |
| Hsd3b7        | NM_133943               | chr7       | 134943936 | 134944178 | -65                  |
| Hprt          | NM_013556               | chrX       | 50341068  | 50341310  | -65                  |
| Rnf187        | NM_022423               | chr11      | 58752324  | 58752619  | -65                  |
| Hsp90aa1      | NM_010480               | chr12      | 111934437 | 111934900 | -65                  |
| Hist1h1c      | NM_015786               | chr13      | 23830375  | 23830846  | -65                  |
| Rab11fip2     | NM_001033172            | chr19      | 60019170  | 60019491  | -65                  |
| Zbtb43        | NM_001025594            | chr2       | 33323992  | 33324239  | -65                  |
| Hk2           | NM_013820               | chr6       | 82724327  | 82724696  | -65                  |
| Iqgap1        | NM_016721               | chr7       | 87948096  | 87948465  | -65                  |
| Cluh          | NM_001081158            | chr11      | 74462699  | 74463165  | -64                  |
| Sap30bp       | NM_020483               | chr11      | 115794739 | 115795077 | -64                  |
| Gpr137c       | NM_027518               | chr14      | 45839101  | 45839553  | -64                  |
| Hmgb1         | NM_010439               | chr5       | 149864453 | 149864899 | -64                  |
| Gins4         | NM_024240               | chr8       | 24347990  | 24348416  | -64                  |
| Zmiz1         | NM_183208               | chr14      | 26278383  | 26278830  | -64                  |
| Vps28         | NM_025842               | chr15      | 76456431  | 76456608  | -64                  |
| Fau           | NM_001160239            | chr19      | 6057636   | 6058011   | -64                  |
| Kif1b         | NM_001290995            | chr4       | 148681773 | 148682036 | -64                  |
| Cops7a        | NM_012003               | chr6       | 124915247 | 124915708 | -64                  |
| Pold1         | NM_011131               | chr7       | 51804045  | 51804450  | -64                  |
| Zdhhc7        | NM_133967               | chr8       | 122625305 | 122625564 | -64                  |
| Ppp1r7        | NM_023200               | chr1       | 95239996  | 95240320  | -63                  |
| Pafah1b1      | NM_013625               | chr11      | 74537800  | 74538096  | -63                  |
| Pum2          | NM_030723               | chr12      | 8681259   | 8681587   | -63                  |
| Naa16         | NM_025832               | chr14      | 79790181  | 79790893  | -63                  |
| Rad9a         | NM_011237               | chr19      | 4201527   | 4201803   | -63                  |
| Babam1        | NM_026636               | chr8       | 73920485  | 73920895  | -63                  |
| Hmgcr         | NM_008255               | chr13      | 97440643  | 97441262  | -63                  |
| Litaf         | NM_019980               | chr16      | 10993104  | 10993447  | -63                  |
| Prpf18        | NM_026045               | chr2       | 4573049   | 4573338   | -63                  |

**Supplemental Table 4. Significant ChIP-seq E2F3B promoter peaks  
(+/- 2kb from the TSS)**

| Gene Symbol | Refseq<br>Transcript ID | Chromosome | Start     | End       | distance<br>from TSS |
|-------------|-------------------------|------------|-----------|-----------|----------------------|
| Abl1        | NM_009594               | chr2       | 31615267  | 31615524  | -63                  |
| Erf         | NM_010155               | chr7       | 26035734  | 26035943  | -63                  |
| Ncoa7       | NM_172495               | chr10      | 30522814  | 30523134  | -62                  |
| Irf2bpl     | NM_145836               | chr12      | 88225543  | 88226107  | -62                  |
| Klf5        | NM_009769               | chr14      | 99697583  | 99698111  | -62                  |
| Mrpl39      | NM_017404               | chr16      | 84735418  | 84735798  | -62                  |
| Rbm18       | NM_026434               | chr2       | 35992114  | 35992456  | -62                  |
| Col16a1     | NM_028266               | chr4       | 129724785 | 129725257 | -62                  |
| Fbl         | NM_007991               | chr7       | 28954581  | 28954827  | -62                  |
| Ppap2a      | NM_008247               | chr13      | 113590700 | 113591145 | -62                  |
| Tigd3       | NM_198634               | chr19      | 5893964   | 5894371   | -62                  |
| Rchy1       | NR_073442               | chr5       | 92391302  | 92391983  | -62                  |
| Ate1        | NM_001136054            | chr7       | 137662879 | 137663430 | -62                  |
| St3gal1     | NM_009177               | chr15      | 67008269  | 67008739  | -61                  |
| Cntrl       | NM_012018               | chr2       | 34964729  | 34965171  | -61                  |
| Ireb2       | NM_022655               | chr9       | 54711352  | 54711648  | -61                  |
| Pitrm1      | NM_145131               | chr13      | 6547098   | 6547585   | -61                  |
| Spdya       | NM_029254               | chr17      | 71901179  | 71901500  | -61                  |
| Ube3c       | NM_133907               | chr5       | 29895466  | 29895975  | -61                  |
| Cand1       | NM_027994               | chr10      | 118677000 | 118677340 | -60                  |
| Stra13      | NM_016665               | chr11      | 120574842 | 120575438 | -60                  |
| Arpc5l      | NM_028809               | chr2       | 38863324  | 38863872  | -60                  |
| Rell1       | NM_145923               | chr5       | 64359911  | 64360479  | -60                  |
| Pot1a       | NM_133931               | chr6       | 25759041  | 25759529  | -60                  |
| Enpp4       | NM_199016               | chr17      | 44242585  | 44243046  | -60                  |
| Tcerg1      | NM_001289526            | chr18      | 42670938  | 42671223  | -60                  |
| Ncdn        | NM_011986               | chr4       | 126430573 | 126430890 | -60                  |
| Snx17       | NM_153680               | chr5       | 31495376  | 31495857  | -60                  |
| Rbpj        | NM_009035               | chr5       | 53981381  | 53981668  | -60                  |
| Btg2        | NM_007570               | chr1       | 135975603 | 135975977 | -59                  |
| Tubg1       | NM_134024               | chr11      | 100981201 | 100981569 | -59                  |
| Mafg        | NM_010756               | chr11      | 120494775 | 120495063 | -59                  |
| Gtpbp4      | NM_027000               | chr13      | 8995096   | 8995536   | -59                  |
| Plxnb2      | NM_138749               | chr15      | 89011086  | 89011466  | -59                  |
| Pex16       | NM_145122               | chr2       | 92215147  | 92215525  | -59                  |
| Serp1       | NM_030685               | chr3       | 58329627  | 58330101  | -59                  |
| Grsf1       | NM_178700               | chr5       | 89105125  | 89105383  | -59                  |
| Zfp383      | NM_001243908            | chr7       | 30693333  | 30693619  | -59                  |
| Nutf2       | NM_026532               | chr8       | 108384096 | 108384852 | -59                  |
| Gls         | NM_001081081            | chr1       | 52289925  | 52290342  | -59                  |
| Rpe         | NM_025683               | chr1       | 66747248  | 66747567  | -59                  |
| E2f6        | NM_033270               | chr12      | 16817563  | 16817860  | -59                  |
| Ptpdc1      | NM_207232               | chr13      | 48720830  | 48721169  | -59                  |
| Them6       | NM_198607               | chr15      | 74551396  | 74551813  | -59                  |
| Lmln        | NM_172823               | chr16      | 33062445  | 33062650  | -59                  |
| Srsf7       | NM_146083               | chr17      | 80606528  | 80606877  | -59                  |
| Bnip2       | NM_016787               | chr9       | 69837012  | 69837415  | -59                  |
| Tspan15     | NM_197996               | chr10      | 61693916  | 61694130  | -58                  |

**Supplemental Table 4. Significant ChIP-seq E2F3B promoter peaks  
(+/- 2kb from the TSS)**

| <b>Gene Symbol</b> | <b>Refseq<br/>Transcript ID</b> | <b>Chromosome</b> | <b>Start</b> | <b>End</b> | <b>distance<br/>from TSS</b> |
|--------------------|---------------------------------|-------------------|--------------|------------|------------------------------|
| Ncln               | NM_134009                       | chr10             | 80958968     | 80959362   | -58                          |
| 1810021B22Rik      | NR_040417                       | chr15             | 88906221     | 88906461   | -58                          |
| 4930549G23Rik      | NR_045376                       | chr18             | 67959495     | 67959813   | -58                          |
| Slc7a5             | NM_011404                       | chr8              | 124431466    | 124431820  | -58                          |
| Hiatl1             | NM_133680                       | chr13             | 65214128     | 65214565   | -58                          |
| Esco2              | NM_028039                       | chr14             | 66452636     | 66453089   | -58                          |
| Rxrb               | NM_001205214                    | chr17             | 34168556     | 34168841   | -58                          |
| Mgst3              | NM_025569                       | chr1              | 169323824    | 169324144  | -57                          |
| Gpx4               | NM_008162                       | chr10             | 79515888     | 79516462   | -57                          |
| Gpatch8            | NM_001159492                    | chr11             | 102417251    | 102417805  | -57                          |
| Snx27              | NM_001082484                    | chr3              | 94386438     | 94386950   | -57                          |
| Cdca7l             | NM_146040                       | chr12             | 119082156    | 119082397  | -57                          |
| Arl14ep            | NM_001025102                    | chr2              | 106814447    | 106814772  | -57                          |
| 1700020l14Rik      | NR_015473                       | chr2              | 119419809    | 119420140  | -57                          |
| Gm10069            | NR_028593                       | chr6              | 128388496    | 128388939  | -57                          |
| BC055324           | NM_201364                       | chr1              | 165924796    | 165925138  | -56                          |
| Zfp68              | NM_001044747                    | chr5              | 139060907    | 139061145  | -56                          |
| Ppif               | NM_134084                       | chr14             | 26513349     | 26513850   | -56                          |
| Pole4              | NM_025882                       | chr6              | 82602764     | 82603063   | -56                          |
| Snrnp40            | NM_025645                       | chr4              | 130037166    | 130037480  | -55                          |
| Gm16039            | NR_033518                       | chr6              | 8209088      | 8209376    | -55                          |
| Fam168a            | NM_178764                       | chr7              | 107854978    | 107855342  | -55                          |
| Sesn3              | NM_030261                       | chr9              | 14080539     | 14080839   | -55                          |
| Mbnl3              | NM_134163                       | chrX              | 48558916     | 48559210   | -55                          |
| Bmpr1a             | NM_009758                       | chr14             | 35315671     | 35315900   | -55                          |
| Plec               | NM_201389                       | chr15             | 76036704     | 76036905   | -55                          |
| Supt3              | NM_178652                       | chr17             | 44913735     | 44914394   | -55                          |
| Golga1             | NM_001290649                    | chr2              | 38920895     | 38921334   | -55                          |
| Sf3b4              | NM_153053                       | chr3              | 95976250     | 95976585   | -55                          |
| Asph               | NM_001177849                    | chr4              | 9596232      | 9596493    | -55                          |
| Fam53a             | NM_178390                       | chr5              | 33972101     | 33972574   | -55                          |
| Rps5               | NM_009095                       | chr7              | 13507438     | 13507771   | -55                          |
| Lrrc20             | NM_153542                       | chr10             | 60938307     | 60938745   | -54                          |
| Taf15              | NM_027427                       | chr11             | 83286309     | 83286801   | -54                          |
| Tmem242            | NM_027457                       | chr17             | 5440077      | 5440549    | -54                          |
| Macrod1            | NM_134147                       | chr19             | 7130979      | 7131427    | -54                          |
| Syng4              | NM_021482                       | chr7              | 53151993     | 53152275   | -54                          |
| Cenpu              | NM_027973                       | chr8              | 47637052     | 47637684   | -54                          |
| Nxt2               | NM_001290533                    | chrX              | 138663094    | 138663288  | -54                          |
| Arl15              | NM_172595                       | chr13             | 114584442    | 114584881  | -54                          |
| Abcf1              | NM_013854                       | chr17             | 36106629     | 36106866   | -54                          |
| Srsf9              | NM_025573                       | chr5              | 115777018    | 115777245  | -54                          |
| Lsm8               | NM_133939                       | chr6              | 18798402     | 18798759   | -54                          |
| Hdac10             | NM_199198                       | chr15             | 88958933     | 88959431   | -53                          |
| Gart               | NM_010256                       | chr16             | 91647058     | 91647480   | -53                          |
| Abcd3              | NM_008991                       | chr3              | 121518002    | 121518368  | -53                          |
| Prpf4              | NM_027297                       | chr4              | 62069524     | 62070002   | -53                          |
| Nap1l1             | NM_015781                       | chr10             | 110909905    | 110910484  | -53                          |

**Supplemental Table 4. Significant ChIP-seq E2F3B promoter peaks  
(+/- 2kb from the TSS)**

| Gene Symbol   | Refseq<br>Transcript ID | Chromosome | Start     | End       | distance<br>from TSS |
|---------------|-------------------------|------------|-----------|-----------|----------------------|
| Rnf144a       | NM_001081977            | chr12      | 27099940  | 27100417  | -53                  |
| Esco1         | NM_001081222            | chr18      | 10610207  | 10610596  | -53                  |
| Cnpy4         | NM_178612               | chr5       | 138628418 | 138629001 | -53                  |
| Xpo6          | NM_028816               | chr7       | 133343730 | 133344217 | -53                  |
| Cab39l        | NM_026908               | chr14      | 60059583  | 60059947  | -52                  |
| Cnpy3         | NM_028065               | chr17      | 46888977  | 46889447  | -52                  |
| Sorbs1        | NM_009166               | chr19      | 40588214  | 40588492  | -52                  |
| Tpk1          | NM_013861               | chr6       | 43615977  | 43616473  | -52                  |
| Mcmbp         | NM_145955               | chr7       | 135883750 | 135884238 | -52                  |
| S1pr2         | NM_010333               | chr9       | 20781007  | 20781569  | -52                  |
| 1190002N15Rik | NM_001033145            | chr9       | 94438399  | 94438703  | -52                  |
| Smek1         | NM_211355               | chr12      | 102321709 | 102322216 | -52                  |
| Zfp81         | NM_207541               | chr17      | 33495714  | 33496033  | -52                  |
| Spg20         | NM_001144988            | chr3       | 54915848  | 54916107  | -52                  |
| Larp7         | NM_138593               | chr3       | 127256069 | 127256566 | -52                  |
| Atrip         | NM_172774               | chr9       | 108976513 | 108976864 | -52                  |
| Dync1h1       | NM_030238               | chr12      | 111839359 | 111839747 | -51                  |
| Trpc4ap       | NM_001163452            | chr2       | 155518079 | 155518261 | -51                  |
| Map2k7        | NM_001164172            | chr8       | 4238427   | 4238949   | -51                  |
| Cdt1          | NM_026014               | chr8       | 125091476 | 125092250 | -51                  |
| Lats2         | NM_015771               | chr14      | 58364803  | 58365216  | -51                  |
| Racgap1       | NM_001253808            | chr15      | 99481963  | 99482310  | -51                  |
| Crkl          | NM_001277231            | chr16      | 17451784  | 17452269  | -51                  |
| Cwc22         | NM_030560               | chr2       | 77784355  | 77784570  | -51                  |
| Acad8         | NM_025862               | chr9       | 26807059  | 26807308  | -51                  |
| Sugt1         | NM_026474               | chr14      | 79987270  | 79987624  | -50                  |
| Eny2          | NM_175009               | chr15      | 44259243  | 44259969  | -50                  |
| Fmnl3         | NM_011711               | chr15      | 99200716  | 99201176  | -50                  |
| Polh          | NM_030715               | chr17      | 46339302  | 46339944  | -50                  |
| Zfp704        | NM_133218               | chr3       | 9610044   | 9610224   | -50                  |
| Smap2         | NM_133716               | chr4       | 120689704 | 120690098 | -50                  |
| Ccdc18        | NM_028481               | chr5       | 108561740 | 108562024 | -50                  |
| 2810428115Rik | NM_025577               | chr8       | 73030591  | 73030783  | -50                  |
| Zfp319        | NM_024467               | chr8       | 97855762  | 97856036  | -50                  |
| Rdh10         | NM_133832               | chr1       | 16095770  | 16096055  | -50                  |
| B230219D22Rik | NM_181278               | chr13      | 55794254  | 55794615  | -50                  |
| Tmem260       | NM_172600               | chr14      | 49065704  | 49066249  | -50                  |
| Atp6v1c1      | NM_025494               | chr15      | 38591371  | 38591846  | -50                  |
| Cpne8         | NM_025815               | chr15      | 90509702  | 90510033  | -50                  |
| 1110008F13Rik | NM_026124               | chr2       | 156688602 | 156689013 | -50                  |
| Sec61a1       | NM_016906               | chr6       | 88468656  | 88469029  | -50                  |
| Brip1         | NM_178309               | chr11      | 86014421  | 86015065  | -49                  |
| Diap3         | NM_019670               | chr14      | 87540748  | 87541190  | -49                  |
| Vps18         | NM_172269               | chr2       | 119114272 | 119114584 | -49                  |
| Actl6a        | NM_019673               | chr3       | 32607175  | 32607661  | -49                  |
| Ppil4         | NM_026141               | chr10      | 7512357   | 7512928   | -49                  |
| Atp5b         | NM_016774               | chr10      | 127520204 | 127520423 | -49                  |
| Cops3         | NM_011991               | chr11      | 59653145  | 59653488  | -49                  |

**Supplemental Table 4. Significant ChIP-seq E2F3B promoter peaks  
(+/- 2kb from the TSS)**

| Gene Symbol   | Refseq<br>Transcript ID | Chromosome | Start     | End       | distance<br>from TSS |
|---------------|-------------------------|------------|-----------|-----------|----------------------|
| Ylpm1         | NM_178363               | chr12      | 86337093  | 86337350  | -49                  |
| Naa60         | NM_029090               | chr16      | 3884407   | 3884732   | -49                  |
| Snrpd1        | NM_009226               | chr18      | 10617545  | 10617944  | -49                  |
| Iscu          | NM_025526               | chr5       | 114222528 | 114223015 | -49                  |
| Ncapd2        | NM_146171               | chr6       | 125141374 | 125141929 | -49                  |
| Synm          | NM_201639               | chr7       | 74904504  | 74904847  | -49                  |
| Pcdh18        | NM_130448               | chr3       | 49561047  | 49561523  | -48                  |
| Prpf38a       | NM_172697               | chr4       | 108251893 | 108252083 | -48                  |
| Lactb         | NM_030717               | chr9       | 66823176  | 66823500  | -48                  |
| Thap4         | NM_025920               | chr1       | 95651280  | 95651643  | -48                  |
| Tmem194       | NM_001113211            | chr10      | 127113834 | 127114311 | -48                  |
| Chaf1b        | NM_028083               | chr16      | 93883731  | 93884464  | -48                  |
| Nasp          | NM_001081475            | chr4       | 116299865 | 116300432 | -48                  |
| Dnajc8        | NM_172400               | chr4       | 132091336 | 132091515 | -48                  |
| 1700003G18Rik | NR_029433               | chr7       | 123236570 | 123236849 | -48                  |
| Dis3l         | NM_001001295            | chr9       | 64188910  | 64189311  | -48                  |
| Armc2         | NM_001034858            | chr10      | 41738029  | 41738439  | -47                  |
| Clptm1l       | NM_146047               | chr13      | 73741239  | 73741565  | -47                  |
| Phf13         | NM_172705               | chr4       | 151370127 | 151370541 | -47                  |
| Tmem38a       | NM_144534               | chr8       | 75095837  | 75096071  | -47                  |
| Piezo1        | NM_001037298            | chr8       | 125074984 | 125075566 | -47                  |
| Cpsf3l        | NM_028020               | chr4       | 155243476 | 155243781 | -47                  |
| Agpat5        | NM_026792               | chr8       | 18846034  | 18846429  | -47                  |
| Rora          | NM_001289916            | chr9       | 69137449  | 69137752  | -47                  |
| Mrpl3         | NM_053159               | chr9       | 104955325 | 104955776 | -47                  |
| Dpy30         | NM_001146223            | chr17      | 74715533  | 74716103  | -46                  |
| Stard6        | NM_029019               | chr18      | 70631917  | 70632205  | -46                  |
| Rpl11         | NM_025919               | chr4       | 135609196 | 135609466 | -46                  |
| Ncam1         | NM_001113204            | chr9       | 49607063  | 49607375  | -46                  |
| BC030867      | NM_153544               | chr11      | 102109978 | 102110321 | -46                  |
| Atad2         | NM_027435               | chr15      | 57966264  | 57967099  | -46                  |
| Myl12a        | NM_026064               | chr17      | 71351750  | 71352085  | -46                  |
| Hnrnpa2b1     | NM_016806               | chr6       | 51419660  | 51420215  | -46                  |
| Cnbp          | NM_001109746            | chr6       | 87800833  | 87801456  | -46                  |
| Ap1s2         | NM_001290379            | chrX       | 160346687 | 160347118 | -46                  |
| Pcbp3         | NM_021568               | chr10      | 76424576  | 76424896  | -45                  |
| Trim32        | NM_053084               | chr4       | 65265771  | 65266177  | -45                  |
| Btf3l4        | NM_027453               | chr4       | 108506007 | 108506459 | -45                  |
| Cdh11         | NM_009866               | chr8       | 105308913 | 105309197 | -45                  |
| E2f5          | NM_007892               | chr3       | 14578505  | 14578746  | -45                  |
| Pdgfra        | NM_008808               | chr5       | 139470772 | 139471129 | -45                  |
| Gars          | NM_180678               | chr6       | 54987821  | 54988078  | -45                  |
| Nt5c3         | NM_026004               | chr6       | 56873786  | 56874153  | -45                  |
| Arpp19        | NM_021548               | chr9       | 74885390  | 74885597  | -45                  |
| Ube2t         | NM_001278115            | chr1       | 136858883 | 136859311 | -44                  |
| Mrpl12        | NM_027204               | chr11      | 120345814 | 120346062 | -44                  |
| March2        | NM_145486               | chr17      | 33855535  | 33855795  | -44                  |
| Ndufv1        | NM_133666               | chr19      | 4012699   | 4012897   | -44                  |

**Supplemental Table 4. Significant ChIP-seq E2F3B promoter peaks  
(+/- 2kb from the TSS)**

| Gene Symbol   | Refseq<br>Transcript ID | Chromosome | Start     | End       | distance<br>from TSS |
|---------------|-------------------------|------------|-----------|-----------|----------------------|
| Peo1          | NM_153796               | chr19      | 45080913  | 45081093  | -44                  |
| Anapc11       | NM_001038230            | chr11      | 120459545 | 120460058 | -44                  |
| Donson        | NM_021720               | chr16      | 91688876  | 91689155  | -44                  |
| Atg2a         | NM_194348               | chr19      | 6241453   | 6241794   | -44                  |
| Fen1          | NM_007999               | chr19      | 10278297  | 10278654  | -44                  |
| Rexo4         | NM_207234               | chr2       | 26819813  | 26820084  | -44                  |
| Kntc1         | NM_001042421            | chr5       | 124199346 | 124200035 | -44                  |
| Ccnt2         | NM_028399               | chr1       | 129670503 | 129670891 | -43                  |
| Pigm          | NM_026234               | chr1       | 174306404 | 174306832 | -43                  |
| Eldr          | NR_110421               | chr11      | 16851091  | 16851563  | -43                  |
| 2410089E03Rik | NM_001162906            | chr15      | 8118909   | 8119215   | -43                  |
| Zfp41         | NM_001044718            | chr15      | 75446833  | 75447307  | -43                  |
| Nolc1         | NM_053086               | chr19      | 46150060  | 46150526  | -43                  |
| Tpm3          | NM_001271764            | chr3       | 89883181  | 89883617  | -43                  |
| Gtpbp10       | NM_153116               | chr5       | 5559422   | 5559664   | -43                  |
| Pml           | NM_008884               | chr9       | 58097432  | 58097838  | -43                  |
| Tle2          | NM_019725               | chr10      | 81037826  | 81038151  | -43                  |
| Txndc17       | NM_026559               | chr11      | 72020865  | 72021160  | -43                  |
| Gcat          | NM_001161712            | chr15      | 78860978  | 78861543  | -43                  |
| Ppp1r18       | NM_175242               | chr17      | 36003397  | 36003636  | -43                  |
| Mcp1          | NM_173189               | chr8       | 18594923  | 18595336  | -43                  |
| Tbk1          | NM_019786               | chr10      | 121023723 | 121024059 | -42                  |
| Pinx1         | NM_028228               | chr14      | 64478959  | 64479253  | -42                  |
| Slc39a14      | NM_001135151            | chr14      | 70751094  | 70751450  | -42                  |
| Rab11fip1     | NM_029423               | chr8       | 28284957  | 28285361  | -42                  |
| Flnb          | NM_134080               | chr14      | 8650304   | 8650553   | -42                  |
| Supt16        | NM_033618               | chr14      | 52816614  | 52817295  | -42                  |
| Rpl3          | NM_013762               | chr15      | 79913556  | 79914197  | -42                  |
| Ccnf          | NM_007634               | chr17      | 24388059  | 24388730  | -42                  |
| Me2           | NM_145494               | chr18      | 73974807  | 73975366  | -42                  |
| Nespas        | NR_002846               | chr2       | 174120792 | 174121163 | -42                  |
| Gtl3          | NM_008187               | chr8       | 97958486  | 97959133  | -42                  |
| Adk           | NM_001243041            | chr14      | 21895041  | 21895623  | -41                  |
| Cxcl10        | NM_021274               | chr5       | 92777831  | 92778079  | -41                  |
| Cox5a         | NM_007747               | chr9       | 57368877  | 57369117  | -41                  |
| Bop1          | NM_013481               | chr15      | 76307566  | 76307911  | -41                  |
| Stxbp1        | NM_001113569            | chr2       | 32702488  | 32703105  | -41                  |
| Soga1         | NM_001164663            | chr2       | 156904865 | 156905216 | -41                  |
| Ttc14         | NM_025978               | chr3       | 33698927  | 33699200  | -41                  |
| Srsf11        | NM_001093753            | chr3       | 157694659 | 157694856 | -41                  |
| Dcaf10        | NM_153167               | chr4       | 45354782  | 45355081  | -41                  |
| Ube2g2        | NM_019803               | chr10      | 77084867  | 77085183  | -40                  |
| Arrb2         | NM_145429               | chr11      | 70245730  | 70246352  | -40                  |
| Cep112        | NM_029606               | chr11      | 108286328 | 108286750 | -40                  |
| Prmt5         | NM_013768               | chr14      | 55136158  | 55136534  | -40                  |
| Zfp523        | NM_172617               | chr17      | 28314095  | 28314549  | -40                  |
| Blm           | NM_001042527            | chr7       | 87679838  | 87680250  | -40                  |
| Gnl3l         | NM_198110               | chrX       | 147451753 | 147452055 | -40                  |

**Supplemental Table 4. Significant ChIP-seq E2F3B promoter peaks (+/- 2kb from the TSS)**

| Gene Symbol   | Refseq Transcript ID | Chromosome | Start     | End       | distance from TSS |
|---------------|----------------------|------------|-----------|-----------|-------------------|
| Zfp672        | NM_001256520         | chr11      | 58143737  | 58144022  | -40               |
| Nxf1          | NM_016813            | chr19      | 8831424   | 8831681   | -40               |
| Mapk9         | NM_016961            | chr11      | 49660031  | 49660395  | -39               |
| Eif1ad        | NM_027236            | chr19      | 5366432   | 5367114   | -39               |
| Hdgf          | NM_008231            | chr3       | 87709840  | 87710566  | -39               |
| Ogfod2        | NM_025671            | chr5       | 124562120 | 124562494 | -39               |
| Irf2bp1       | NM_178757            | chr7       | 19589132  | 19589616  | -39               |
| Rrm1          | NM_009103            | chr7       | 109589879 | 109590459 | -39               |
| Cisd1         | NM_134007            | chr10      | 70807516  | 70807753  | -39               |
| Smdt1         | NM_026914            | chr15      | 82176275  | 82176598  | -39               |
| Lemd2         | NM_146075            | chr17      | 27341238  | 27341603  | -39               |
| Ccdc167       | NM_001163741         | chr17      | 29853782  | 29854217  | -39               |
| Mob1b         | NM_026735            | chr5       | 89149726  | 89149987  | -39               |
| Smg9          | NM_028047            | chr7       | 25184427  | 25184789  | -38               |
| A630066F11Rik | NR_030698            | chr10      | 7382973   | 7383288   | -38               |
| Cox7c         | NM_007749            | chr13      | 86186334  | 86186539  | -38               |
| Zfp91Cntf     | NR_024093            | chr19      | 12870527  | 12870772  | -38               |
| Tor1a         | NM_144884            | chr2       | 30823272  | 30823677  | -38               |
| Bag1          | NM_001171739         | chr4       | 40895226  | 40895501  | -38               |
| Ablim2        | NM_001177698         | chr5       | 36100314  | 36100667  | -38               |
| Sntb2         | NM_009229            | chr8       | 109459429 | 109459794 | -38               |
| Tmem158       | NM_001002267         | chr9       | 123169735 | 123170152 | -38               |
| Nde1          | NM_001285503         | chr16      | 14163117  | 14163543  | -37               |
| Dzip3         | NM_001110017         | chr16      | 48994094  | 48994428  | -37               |
| Gorasp2       | NM_027352            | chr2       | 70499342  | 70499714  | -37               |
| Dido1         | NM_177852            | chr2       | 180444550 | 180444930 | -37               |
| 1200014J11Rik | NM_025818            | chr11      | 72861115  | 72861548  | -37               |
| Ror2          | NM_013846            | chr13      | 53381273  | 53381754  | -37               |
| 1700037H04Rik | NM_026091            | chr2       | 130985665 | 130985918 | -37               |
| Lxn           | NM_016753            | chr3       | 67267784  | 67267945  | -37               |
| B3glct        | NM_001081204         | chr5       | 150480682 | 150480907 | -37               |
| Lsm5          | NM_025520            | chr6       | 56654637  | 56654820  | -37               |
| Usp47         | NM_133758            | chr7       | 119166817 | 119167148 | -37               |
| Lamp1         | NM_010684            | chr8       | 13158879  | 13159316  | -37               |
| Rab23         | NM_008999            | chr1       | 33776492  | 33776916  | -36               |
| Cnnm3         | NM_001039551         | chr1       | 36568494  | 36568874  | -36               |
| Actr2         | NM_146243            | chr11      | 20012856  | 20013122  | -36               |
| Flot2         | NM_001040403         | chr11      | 77851191  | 77851621  | -36               |
| Rpl23         | NM_022891            | chr11      | 97643651  | 97643925  | -36               |
| Nbn           | NM_013752            | chr4       | 15884827  | 15885327  | -36               |
| Inip          | NM_001013577         | chr4       | 59796587  | 59796937  | -36               |
| Rnf8          | NM_021419            | chr17      | 29751464  | 29752015  | -36               |
| Spink10       | NM_177829            | chr18      | 62708371  | 62708686  | -36               |
| Hnrnpr        | NM_001277121         | chr4       | 135866556 | 135867085 | -36               |
| Gpr19         | NM_001167696         | chr6       | 134847700 | 134848055 | -36               |
| Saal1         | NM_030233            | chr7       | 53965919  | 53966192  | -36               |
| Hspd1         | NM_010477            | chr1       | 55144578  | 55145042  | -35               |
| Gorab         | NM_178883            | chr1       | 165333564 | 165334048 | -35               |

**Supplemental Table 4. Significant ChIP-seq E2F3B promoter peaks  
(+/- 2kb from the TSS)**

| Gene Symbol   | Refseq<br>Transcript ID | Chromosome | Start     | End       | distance<br>from TSS |
|---------------|-------------------------|------------|-----------|-----------|----------------------|
| Cradd         | NM_009950               | chr10      | 94786545  | 94786985  | -35                  |
| Six1          | NM_009189               | chr12      | 74147541  | 74147925  | -35                  |
| Agpat1        | NM_001163379            | chr17      | 34742633  | 34742907  | -35                  |
| Znhit6        | NM_001081094            | chr3       | 145238870 | 145239402 | -35                  |
| Brd9          | NM_001024508            | chr13      | 74074998  | 74075503  | -35                  |
| Pbk           | NM_023209               | chr14      | 66424425  | 66425000  | -35                  |
| Tsfm          | NM_025537               | chr10      | 126467673 | 126468133 | -34                  |
| Wipf2         | NM_197940               | chr11      | 98724747  | 98725007  | -34                  |
| Gstz1         | NM_010363               | chr12      | 88488430  | 88488814  | -34                  |
| Mob1a         | NM_145571               | chr6       | 83275835  | 83276161  | -34                  |
| Mars2         | NM_175439               | chr1       | 55293780  | 55294193  | -34                  |
| 1700016L04Rik | NR_045824               | chr10      | 14425225  | 14425536  | -34                  |
| Hmmr          | NM_013552               | chr11      | 40546830  | 40547113  | -34                  |
| Mtdh          | NM_026002               | chr15      | 34012290  | 34012589  | -34                  |
| Rbbp4         | NM_009030               | chr4       | 129012249 | 129013044 | -34                  |
| Mlxip         | NM_133917               | chr5       | 123844657 | 123844888 | -34                  |
| Rnps1         | NM_001080128            | chr17      | 24551259  | 24551913  | -33                  |
| Ubr2          | NM_001177374            | chr17      | 47147302  | 47147724  | -33                  |
| Ddx51         | NM_027156               | chr5       | 111082210 | 111082662 | -33                  |
| Rhno1         | NR_027359               | chr6       | 128312858 | 128313036 | -33                  |
| Smim19        | NM_001146117            | chr8       | 23587220  | 23587546  | -33                  |
| Manf          | NM_029103               | chr9       | 106794126 | 106794476 | -33                  |
| Rps6ka3       | NM_148945               | chrX       | 155693519 | 155693841 | -33                  |
| Zswim8        | NM_001252081            | chr14      | 21526581  | 21526900  | -33                  |
| Cttnbl1       | NM_025680               | chr2       | 157562872 | 157563335 | -33                  |
| Dock7         | NM_026082               | chr4       | 98787471  | 98787804  | -33                  |
| Mafk          | NM_010757               | chr5       | 140267263 | 140267650 | -33                  |
| Acsl3         | NM_001033606            | chr1       | 78654093  | 78654641  | -32                  |
| Ptges3        | NM_019766               | chr10      | 127495740 | 127496270 | -32                  |
| Rcbtb1        | NM_027764               | chr14      | 59819753  | 59820311  | -32                  |
| Cebpz         | NM_001024806            | chr17      | 79336241  | 79336641  | -32                  |
| Ankrd10       | NM_001281974            | chr8       | 11635576  | 11636000  | -32                  |
| Ppp2r3a       | NM_001161362            | chr9       | 101153935 | 101154451 | -32                  |
| Extl3         | NM_018788               | chr14      | 65716789  | 65717158  | -32                  |
| Atp5o         | NM_138597               | chr16      | 91931742  | 91932069  | -32                  |
| Cdan1         | NM_026891               | chr2       | 120557078 | 120557489 | -32                  |
| Myef2         | NM_001162417            | chr2       | 124949288 | 124949565 | -32                  |
| Cc2d1b        | NM_177045               | chr4       | 108292242 | 108292815 | -32                  |
| Cdc16         | NM_027276               | chr8       | 13757479  | 13757836  | -32                  |
| Zcchc2        | NM_001122675            | chr1       | 107886680 | 107887223 | -31                  |
| Rif1          | NM_175238               | chr2       | 51928195  | 51928456  | -31                  |
| Tmem67        | NR_110955               | chr4       | 12014993  | 12015374  | -31                  |
| Eps15         | NM_007943               | chr4       | 108952635 | 108953062 | -31                  |
| Rad54l        | NM_001122959            | chr4       | 115796196 | 115796453 | -31                  |
| Rragb         | NM_001004154            | chrX       | 149574286 | 149574653 | -31                  |
| Nvl           | NM_026171               | chr1       | 183074039 | 183074595 | -30                  |
| Cdkl3         | NM_001166654            | chr11      | 51817533  | 51817851  | -30                  |
| Ankrd32       | NM_134071               | chr13      | 77274644  | 77274872  | -30                  |



**Supplemental Table 4. Significant ChIP-seq E2F3B promoter peaks  
(+/- 2kb from the TSS)**

| Gene Symbol   | Refseq<br>Transcript ID | Chromosome | Start     | End       | distance<br>from TSS |
|---------------|-------------------------|------------|-----------|-----------|----------------------|
| Alcam         | NM_009655               | chr16      | 52452833  | 52453445  | -30                  |
| Cdkn2a        | NM_001040654            | chr4       | 88927956  | 88928294  | -30                  |
| Prmt1         | NM_019830               | chr7       | 52241689  | 52241949  | -30                  |
| Tmem231       | NM_001033321            | chr8       | 114457600 | 114457840 | -30                  |
| Vars          | NM_011690               | chr17      | 35137631  | 35138012  | -30                  |
| Mcm8          | NM_025676               | chr2       | 132641623 | 132642070 | -30                  |
| Emg1          | NM_013536               | chr6       | 124662040 | 124662409 | -30                  |
| Plk1          | NM_011121               | chr7       | 129302788 | 129303053 | -30                  |
| Echs1         | NM_053119               | chr7       | 147302205 | 147302496 | -30                  |
| Rassf5        | NM_018750               | chr1       | 133141602 | 133141964 | -29                  |
| E130309D02Rik | NM_172726               | chr5       | 144076919 | 144077215 | -29                  |
| Lphn1         | NM_181039               | chr8       | 86423818  | 86424116  | -29                  |
| 5830418K08Rik | NM_176976               | chr9       | 15162087  | 15162433  | -29                  |
| Nuf2          | NM_023284               | chr1       | 171461417 | 171461828 | -29                  |
| Kif13b        | NM_001081177            | chr14      | 65271135  | 65271542  | -29                  |
| Strn          | NM_011500               | chr17      | 79135695  | 79136160  | -29                  |
| Emc7          | NM_133749               | chr2       | 112295017 | 112295288 | -29                  |
| Snrpb         | NM_009225               | chr2       | 130004866 | 130005389 | -29                  |
| Zranb2        | NM_017381               | chr3       | 157197017 | 157197646 | -29                  |
| Psemb2        | NM_011970               | chr4       | 126354683 | 126355032 | -29                  |
| Tmem222       | NM_025667               | chr4       | 132833515 | 132833950 | -29                  |
| Mcm7          | NM_008568               | chr5       | 138612869 | 138613366 | -29                  |
| Rad18         | NM_001167730            | chr6       | 112646506 | 112646877 | -29                  |
| Nfat5         | NM_018823               | chr8       | 109817141 | 109817540 | -29                  |
| Aurkb         | NM_011496               | chr11      | 68859021  | 68859211  | -28                  |
| 4930452B06Rik | NM_028934               | chr14      | 9498700   | 9498962   | -28                  |
| Sgol1         | NM_028232               | chr17      | 53828480  | 53828854  | -28                  |
| Smchd1        | NM_028887               | chr17      | 71824465  | 71824955  | -28                  |
| Exosc2        | NM_144886               | chr2       | 31526099  | 31526357  | -28                  |
| Snrpd2        | NM_026943               | chr7       | 19734981  | 19735335  | -28                  |
| Fam219b       | NM_175273               | chr9       | 57385177  | 57385435  | -28                  |
| Adam15        | NM_009614               | chr3       | 89153772  | 89154145  | -28                  |
| Brca2         | NM_009765               | chr5       | 151324920 | 151325415 | -28                  |
| Vma21         | NM_001081356            | chrX       | 69061955  | 69062182  | -28                  |
| Cep78         | NM_198019               | chr19      | 16059352  | 16059658  | -27                  |
| Kin           | NM_025280               | chr2       | 10001949  | 10002473  | -27                  |
| Nek6          | NM_001159631            | chr2       | 38367202  | 38367534  | -27                  |
| Ahcyl1        | NM_145542               | chr3       | 107499294 | 107499690 | -27                  |
| Rnf38         | NM_175201               | chr4       | 44180291  | 44180581  | -27                  |
| Cenpc1        | NM_007683               | chr5       | 86494520  | 86494748  | -27                  |
| Mlh1          | NM_026810               | chr9       | 111173970 | 111174306 | -27                  |
| Sept2         | NM_010891               | chr1       | 95375343  | 95375742  | -27                  |
| Ccdc71l       | NM_001162903            | chr12      | 33063445  | 33063808  | -27                  |
| Nr1d2         | NM_011584               | chr14      | 19071347  | 19071944  | -27                  |
| Dxo           | NM_001163770            | chr17      | 34973682  | 34974191  | -27                  |
| Bub1b         | NM_009773               | chr2       | 118423669 | 118424170 | -27                  |
| Slc20a1       | NM_015747               | chr2       | 129024285 | 129024678 | -27                  |
| 6330408A02Rik | NM_177312               | chr7       | 13863885  | 13864306  | -27                  |

**Supplemental Table 4. Significant ChIP-seq E2F3B promoter peaks  
(+/- 2kb from the TSS)**

| Gene Symbol   | Refseq<br>Transcript ID | Chromosome | Start     | End       | distance<br>from TSS |
|---------------|-------------------------|------------|-----------|-----------|----------------------|
| Lipt2         | NM_026010               | chr7       | 107307653 | 107307866 | -27                  |
| Taf1          | NM_001290729            | chrX       | 98727818  | 98728275  | -27                  |
| A230046K03Rik | NM_001033375            | chr10      | 83006515  | 83006803  | -26                  |
| 2310003H01Rik | NM_027980               | chr11      | 120239940 | 120240230 | -26                  |
| Aaas          | NM_153416               | chr15      | 102180971 | 102181459 | -26                  |
| Rbm4          | NM_001290125            | chr19      | 4793730   | 4794122   | -26                  |
| Adh5          | NM_007410               | chr3       | 138105814 | 138106246 | -26                  |
| Zcwpw1        | NM_001005426            | chr5       | 138228743 | 138229263 | -26                  |
| Lsm3          | NM_026309               | chr6       | 91465879  | 91466125  | -26                  |
| Spc24         | NM_026282               | chr9       | 21564617  | 21564893  | -26                  |
| Pola1         | NM_008892               | chrX       | 90877179  | 90877859  | -26                  |
| Tmem220       | NM_001291043            | chr11      | 66838465  | 66838794  | -26                  |
| Cinp          | NM_026048               | chr12      | 112127209 | 112127550 | -26                  |
| Ppm1f         | NM_176833               | chr16      | 16896378  | 16896693  | -26                  |
| Tubb5         | NM_011655               | chr17      | 35975119  | 35975422  | -26                  |
| Gnpda1        | NM_011937               | chr18      | 38498583  | 38498760  | -26                  |
| Smim8         | NM_025471               | chr4       | 34725405  | 34725816  | -26                  |
| Ap1s1         | NM_007457               | chr5       | 137521682 | 137522227 | -26                  |
| Osr2          | NM_054049               | chr15      | 35225663  | 35226019  | -25                  |
| Sdf2l1        | NM_022324               | chr16      | 17132208  | 17132792  | -25                  |
| Zc3h8         | NM_020594               | chr2       | 128769622 | 128769938 | -25                  |
| Msto1         | NM_144898               | chr3       | 88717694  | 88718098  | -25                  |
| Chd1l         | NM_026539               | chr3       | 97413838  | 97414436  | -25                  |
| Tspan3        | NM_019793               | chr9       | 56008790  | 56009012  | -25                  |
| Epb4.1l2      | NM_001199265            | chr10      | 25079370  | 25079787  | -25                  |
| Txlna         | NM_001005506            | chr4       | 129317830 | 129318315 | -25                  |
| Gm4532        | NR_030674               | chr7       | 134376483 | 134376852 | -25                  |
| Spg7          | NM_153176               | chr8       | 125589199 | 125589566 | -25                  |
| Rasal2        | NM_177644               | chr1       | 159342584 | 159342914 | -24                  |
| Tppp          | NM_182839               | chr13      | 74146716  | 74146968  | -24                  |
| Mrps27        | NM_173757               | chr13      | 100114603 | 100114829 | -24                  |
| Fam118a       | NM_133750               | chr15      | 84867277  | 84867657  | -24                  |
| Ubn1          | NM_026666               | chr16      | 5049883   | 5050389   | -24                  |
| Srsf3         | NM_013663               | chr17      | 29169345  | 29169815  | -24                  |
| Itgav         | NM_008402               | chr2       | 83564362  | 83564696  | -24                  |
| Rab2a         | NM_021518               | chr4       | 8462589   | 8462943   | -24                  |
| Srrd          | NM_027323               | chr5       | 112771982 | 112772184 | -24                  |
| Tfap4         | NM_031182               | chr16      | 4559502   | 4559983   | -24                  |
| Olfml3        | NM_133859               | chr3       | 103541759 | 103542134 | -24                  |
| Cntln         | NM_175275               | chr4       | 84529965  | 84530412  | -24                  |
| Eif3b         | NM_133916               | chr5       | 140895136 | 140895333 | -24                  |
| Plagl1        | NM_009538               | chr10      | 12810319  | 12810821  | -23                  |
| Myo1c         | NM_008659               | chr11      | 75464848  | 75465126  | -23                  |
| Rreb1         | NM_001039188            | chr13      | 37919123  | 37919353  | -23                  |
| Matn2         | NM_016762               | chr15      | 34236275  | 34236549  | -23                  |
| Ddx20         | NM_017397               | chr3       | 105490338 | 105490684 | -23                  |
| Tmem43        | NM_028766               | chr6       | 91423614  | 91423828  | -23                  |
| Tmtc3         | NM_001110013            | chr10      | 99949665  | 99950340  | -23                  |

**Supplemental Table 4. Significant ChIP-seq E2F3B promoter peaks  
(+/- 2kb from the TSS)**

| Gene Symbol   | Refseq<br>Transcript ID | Chromosome | Start     | End       | distance<br>from TSS |
|---------------|-------------------------|------------|-----------|-----------|----------------------|
| Rheb1         | NM_026967               | chr15      | 98711630  | 98712103  | -23                  |
| Tcp1          | NM_013686               | chr17      | 13108887  | 13109456  | -23                  |
| Ppp1cb        | NM_172707               | chr5       | 32760970  | 32761669  | -23                  |
| Nono          | NM_023144               | chrX       | 98624857  | 98625076  | -23                  |
| Mthfd1        | NM_138745               | chr12      | 77355871  | 77356521  | -22                  |
| Myh9          | NM_022410               | chr15      | 77672242  | 77673010  | -22                  |
| Lpar1         | NM_172989               | chr4       | 58566044  | 58566328  | -22                  |
| Add1          | NM_013457               | chr5       | 34916138  | 34916542  | -22                  |
| Coq2          | NM_027978               | chr5       | 101103165 | 101103427 | -22                  |
| Srpr          | NM_026130               | chr9       | 35018552  | 35018978  | -22                  |
| Fhl4          | NM_010214               | chr10      | 84565102  | 84565419  | -22                  |
| Mrpl14        | NM_026732               | chr17      | 45823171  | 45823426  | -22                  |
| Mrps18c       | NM_026826               | chr5       | 101227524 | 101227987 | -22                  |
| Eif3g         | NM_016876               | chr9       | 20702886  | 20703223  | -22                  |
| Hist1h2ag     | NM_178186               | chr13      | 22134704  | 22134972  | -21                  |
| Amdhd2        | NM_172935               | chr17      | 24300546  | 24300894  | -21                  |
| Gemin6        | NM_026053               | chr17      | 80623720  | 80623894  | -21                  |
| Rab33b        | NM_016858               | chr3       | 51287664  | 51288068  | -21                  |
| Ripk1         | NM_009068               | chr13      | 34094604  | 34094839  | -21                  |
| E2f1          | NM_007891               | chr2       | 154395424 | 154395871 | -21                  |
| Tfip11        | NM_018783               | chr5       | 112755212 | 112755523 | -21                  |
| Rad51ap1      | NM_009013               | chr6       | 126889451 | 126889734 | -21                  |
| Gemin2        | NM_025656               | chr12      | 60114189  | 60114529  | -20                  |
| Ifit2         | NM_008332               | chr19      | 34624989  | 34625337  | -20                  |
| Stk35         | NM_183262               | chr2       | 129626096 | 129626368 | -20                  |
| Prdx1         | NM_011034               | chr4       | 116358050 | 116358316 | -20                  |
| Taf12         | NM_025579               | chr4       | 131830160 | 131830378 | -20                  |
| Pdap1         | NM_001033313            | chr5       | 145900725 | 145901229 | -20                  |
| Polb          | NM_011130               | chr8       | 23763800  | 23764056  | -20                  |
| Cab39         | NM_133781               | chr1       | 87689838  | 87690165  | -20                  |
| Espl1         | NM_001014976            | chr15      | 102126510 | 102126897 | -20                  |
| Slc35a3       | NM_144902               | chr3       | 116415121 | 116415312 | -20                  |
| Cyr61         | NM_010516               | chr3       | 145312831 | 145313104 | -20                  |
| Tma16         | NM_025465               | chr8       | 69010234  | 69010615  | -20                  |
| Ccdc122       | NM_175369               | chr14      | 77436430  | 77436688  | -19                  |
| Toporsos      | NR_045265               | chr4       | 40216417  | 40216767  | -19                  |
| D830031N03Rik | NM_001167918            | chr4       | 123089012 | 123089332 | -19                  |
| Klhl17        | NM_198305               | chr4       | 155608817 | 155609151 | -19                  |
| Fscn1         | NM_007984               | chr5       | 143721809 | 143722219 | -19                  |
| Ticrr         | NM_029835               | chr7       | 86804755  | 86805369  | -19                  |
| Ranbp1        | NM_011239               | chr16      | 18248495  | 18249114  | -19                  |
| Pdia3         | NM_007952               | chr2       | 121239345 | 121239892 | -19                  |
| Plekhf2       | NM_175175               | chr4       | 10934551  | 10935016  | -19                  |
| Cdca3         | NM_013538               | chr6       | 124780011 | 124780338 | -19                  |
| Polr3e        | NM_025298               | chr7       | 128061130 | 128061347 | -19                  |
| Tceb1         | NM_026456               | chr1       | 16646752  | 16647174  | -18                  |
| Tanc1         | NM_198294               | chr2       | 59449884  | 59450276  | -18                  |
| Arl2          | NM_019722               | chr19      | 6141022   | 6141285   | -18                  |

**Supplemental Table 4. Significant ChIP-seq E2F3B promoter peaks  
(+/- 2kb from the TSS)**

| Gene Symbol   | Refseq<br>Transcript ID | Chromosome | Start     | End       | distance<br>from TSS |
|---------------|-------------------------|------------|-----------|-----------|----------------------|
| Nsl1          | NM_198654               | chr1       | 192886689 | 192887075 | -17                  |
| Hus1          | NM_008316               | chr11      | 8911009   | 8911303   | -17                  |
| 9330151L19Rik | NR_033222               | chr12      | 70297996  | 70298364  | -17                  |
| Mccc2         | NM_030026               | chr13      | 100785464 | 100785756 | -17                  |
| Smim4         | NR_024069               | chr14      | 31941859  | 31942405  | -17                  |
| Sema3g        | NM_001025379            | chr14      | 32030897  | 32031185  | -17                  |
| 2700094K13Rik | NM_001033166            | chr2       | 84510735  | 84511027  | -17                  |
| Exoc4         | NM_009148               | chr6       | 33198884  | 33199380  | -17                  |
| Zfp280b       | NM_177475               | chr10      | 75495197  | 75495482  | -17                  |
| Trim65        | NM_178802               | chr11      | 115992289 | 115992626 | -17                  |
| Get4          | NM_026269               | chr5       | 139728094 | 139728427 | -17                  |
| A130010J15Rik | NM_001160360            | chr1       | 194999372 | 194999920 | -16                  |
| Naa35         | NM_030153               | chr13      | 59686521  | 59686833  | -16                  |
| Pigt          | NM_133779               | chr2       | 164322870 | 164323146 | -16                  |
| Tmem60        | NM_177601               | chr5       | 20388130  | 20388378  | -16                  |
| Smarcc1       | NM_009211               | chr9       | 110034192 | 110034830 | -16                  |
| Ppil1         | NM_026845               | chr17      | 29400573  | 29401288  | -16                  |
| Slc31a2       | NM_025286               | chr4       | 61947270  | 61947623  | -16                  |
| Recql         | NM_001204907            | chr6       | 142335465 | 142335778 | -16                  |
| Ppm1m         | NM_026447               | chr9       | 106101450 | 106101707 | -16                  |
| Alas1         | NM_020559               | chr9       | 106150157 | 106150442 | -16                  |
| Ptpn23        | NM_001081043            | chr9       | 110310555 | 110310902 | -16                  |
| Tmco1         | NM_001039483            | chr1       | 169238639 | 169238931 | -15                  |
| Poc1b         | NM_027740               | chr10      | 98569608  | 98569970  | -15                  |
| Ghitm         | NM_078478               | chr14      | 37948348  | 37948696  | -15                  |
| Erp29         | NM_026129               | chr5       | 121902278 | 121902716 | -15                  |
| Fancb         | NM_001146081            | chrX       | 161418265 | 161418751 | -15                  |
| Abi2          | NM_198127               | chr1       | 60466247  | 60466648  | -15                  |
| Gsg2          | NM_010353               | chr11      | 72951681  | 72951938  | -15                  |
| Stil          | NM_009185               | chr4       | 114672346 | 114673069 | -15                  |
| Lrwd1         | NM_027891               | chr5       | 136611747 | 136612168 | -15                  |
| Naf1          | NM_001163564            | chr8       | 69383963  | 69384238  | -15                  |
| 4930432K21Rik | NM_001163752            | chr8       | 86671728  | 86672115  | -15                  |
| Prdx4         | NM_016764               | chrX       | 151772901 | 151773120 | -15                  |
| Tmem194b      | NM_001142647            | chr1       | 52687331  | 52687737  | -14                  |
| Ing3          | NM_023626               | chr6       | 21899482  | 21899718  | -14                  |
| Farsa         | NM_025648               | chr8       | 87380711  | 87381029  | -14                  |
| Ube2d1        | NM_145420               | chr10      | 70747762  | 70748283  | -14                  |
| AA465934      | NR_028363               | chr11      | 83105000  | 83105373  | -14                  |
| Xylt1         | NM_198626               | chr16      | 31081319  | 31081742  | -14                  |
| Bambi-ps1     | NR_027919               | chr2       | 122293367 | 122293724 | -14                  |
| Nans          | NM_053179               | chr4       | 46501968  | 46502405  | -14                  |
| Mapk6         | NM_015806               | chr9       | 75257605  | 75258066  | -14                  |
| Vamp3         | NM_009498               | chr4       | 150431876 | 150432272 | -13                  |
| Specc1l       | NM_153406               | chr10      | 74674670  | 74674939  | -13                  |
| Slc25a10      | NM_013770               | chr11      | 120353047 | 120353228 | -13                  |
| Tgfbrap1      | NM_001013025            | chr1       | 43155318  | 43155638  | -12                  |
| Arf1          | NM_001130408            | chr11      | 59041496  | 59041854  | -12                  |

**Supplemental Table 4. Significant ChIP-seq E2F3B promoter peaks  
(+/- 2kb from the TSS)**

| Gene Symbol   | Refseq<br>Transcript ID | Chromosome | Start     | End       | distance<br>from TSS |
|---------------|-------------------------|------------|-----------|-----------|----------------------|
| 0610010K14Rik | NM_001177603            | chr11      | 70051250  | 70051604  | -12                  |
| Zfp367        | NM_175494               | chr13      | 64254216  | 64254820  | -12                  |
| Cdc123        | NM_133837               | chr2       | 5765869   | 5766165   | -12                  |
| Efhd2         | NM_025994               | chr4       | 141430662 | 141431030 | -12                  |
| Sf3b2         | NM_030109               | chr19      | 5295251   | 5295680   | -12                  |
| Rap2b         | NM_028712               | chr3       | 61168272  | 61168561  | -12                  |
| Tob1          | NM_009427               | chr11      | 94072591  | 94072921  | -11                  |
| Appl1         | NM_145221               | chr14      | 27783544  | 27783950  | -11                  |
| Psmc2         | NM_134101               | chr16      | 20651504  | 20651922  | -11                  |
| Med20         | NM_020048               | chr17      | 47748306  | 47748760  | -11                  |
| Arhgap11a     | NM_181416               | chr2       | 113688663 | 113688993 | -11                  |
| 4930539J05Rik | NR_030689               | chr3       | 135101550 | 135101728 | -11                  |
| Cox18         | NM_001033310            | chr5       | 90652890  | 90653172  | -11                  |
| Wdr61         | NM_001025376            | chr9       | 54582263  | 54582469  | -11                  |
| Mcm6          | NM_008567               | chr1       | 130255917 | 130256568 | -11                  |
| Lin9          | NM_175186               | chr1       | 182571364 | 182571543 | -11                  |
| Adat3         | NM_001100606            | chr10      | 80065472  | 80065755  | -11                  |
| Gm12359       | NR_033551               | chr11      | 98671299  | 98671526  | -11                  |
| Sgms1         | NM_001168526            | chr19      | 32285254  | 32285771  | -11                  |
| Klhl26        | NM_178771               | chr8       | 73000726  | 73000977  | -11                  |
| Tfrc          | NM_011638               | chr16      | 32608767  | 32609175  | -10                  |
| Elac1         | NM_053255               | chr18      | 73913971  | 73914313  | -10                  |
| Haus6         | NM_173400               | chr4       | 86257830  | 86258040  | -10                  |
| Ppp1r8        | NM_146154               | chr4       | 132398959 | 132399227 | -10                  |
| Crtap         | NM_019922               | chr9       | 114299679 | 114299999 | -10                  |
| Dna2          | NM_177372               | chr10      | 62409591  | 62409942  | -10                  |
| Heatr5a       | NM_177171               | chr12      | 53072139  | 53072494  | -10                  |
| Pvt1          | NR_003368               | chr15      | 61869354  | 61869709  | -10                  |
| Tob2          | NM_020507               | chr15      | 81688599  | 81688930  | -10                  |
| Adprh         | NM_007414               | chr16      | 38452570  | 38452985  | -10                  |
| Cmtr1         | NM_028791               | chr17      | 29797397  | 29797674  | -10                  |
| Spry1         | NM_011896               | chr3       | 37538755  | 37538968  | -10                  |
| Zmym1         | NM_026670               | chr4       | 126738238 | 126738531 | -10                  |
| Snrpg         | NM_026506               | chr6       | 86321328  | 86321719  | -10                  |
| Aifm1         | NM_012019               | chrX       | 45866533  | 45866964  | -10                  |
| Spdl1         | NM_027411               | chr11      | 34646961  | 34647341  | -9                   |
| Mgat4b        | NM_145926               | chr11      | 50038697  | 50038957  | -9                   |
| Osbpl1a       | NM_207530               | chr18      | 13100232  | 13100484  | -9                   |
| Wdr89         | NM_028203               | chr12      | 76770239  | 76770824  | -9                   |
| Dab2          | NM_001037905            | chr15      | 6336536   | 6336941   | -9                   |
| Usp1          | NM_146144               | chr4       | 98590204  | 98590779  | -9                   |
| Ddx55         | NM_001190795            | chr5       | 125002620 | 125003107 | -9                   |
| 4933426M11Rik | NM_178682               | chr12      | 81891280  | 81891740  | -8                   |
| F2r           | NM_010169               | chr13      | 96388031  | 96388759  | -8                   |
| Metap1d       | NM_025633               | chr2       | 71291196  | 71291576  | -8                   |
| Ywhah         | NM_011738               | chr5       | 33361208  | 33361704  | -8                   |
| Slc7a1        | NM_007513               | chr5       | 149211257 | 149211717 | -8                   |
| Pih1d1        | NM_029406               | chr7       | 52409524  | 52409804  | -8                   |

**Supplemental Table 4. Significant ChIP-seq E2F3B promoter peaks (+/- 2kb from the TSS)**

| Gene Symbol   | Refseq Transcript ID | Chromosome | Start     | End       | distance from TSS |
|---------------|----------------------|------------|-----------|-----------|-------------------|
| 2300009A05Rik | NM_027090            | chr9       | 63246892  | 63247224  | -8                |
| Cenpi         | NM_145924            | chrX       | 130842489 | 130842897 | -8                |
| Cap1          | NM_007598            | chr4       | 122562940 | 122563321 | -8                |
| Qrs1          | NM_001081054         | chr10      | 43621337  | 43621759  | -7                |
| Nkapl         | NM_025719            | chr13      | 21560164  | 21560588  | -7                |
| Vgf           | NM_001039385         | chr5       | 137505974 | 137506340 | -7                |
| Pgls          | NM_025396            | chr8       | 74115765  | 74116385  | -7                |
| 6430548M08Rik | NM_001163761         | chr8       | 122637950 | 122638138 | -7                |
| Csrp1         | NM_007791            | chr1       | 137625636 | 137625897 | -7                |
| Lmnb2         | NM_010722            | chr10      | 80380762  | 80381229  | -7                |
| Ttll12        | NM_183017            | chr15      | 83425481  | 83425704  | -7                |
| Vps37c        | NM_181403            | chr19      | 10763116  | 10763479  | -7                |
| Epha2         | NM_010139            | chr4       | 140856947 | 140857310 | -7                |
| Nup62-il4i1   | NM_001171024         | chr7       | 52071521  | 52071944  | -7                |
| Natd1         | NM_025294            | chr11      | 60727159  | 60727439  | -6                |
| Fut8          | NM_001252614         | chr12      | 78338951  | 78339217  | -6                |
| Pqlc2         | NM_145384            | chr4       | 138866361 | 138866879 | -6                |
| Rpsa          | NM_011029            | chr9       | 120036662 | 120037092 | -6                |
| Trmt2b        | NM_172540            | chrX       | 130811357 | 130811699 | -6                |
| Pam           | NM_013626            | chr1       | 99992039  | 99992388  | -6                |
| Bsg           | NM_001077184         | chr10      | 79166928  | 79167265  | -6                |
| Igsf8         | NM_080419            | chr1       | 174242310 | 174242754 | -5                |
| Tube1         | NM_028006            | chr10      | 38853651  | 38853995  | -5                |
| Fam58b        | NM_197989            | chr11      | 78565090  | 78565380  | -5                |
| Tbccd1        | NM_001081368         | chr16      | 22857455  | 22857837  | -5                |
| Ctdp1         | NM_026295            | chr18      | 80666321  | 80666499  | -5                |
| Psmc3         | NM_008948            | chr2       | 90893995  | 90894339  | -5                |
| Msantd3       | NM_001145924         | chr4       | 48552765  | 48553129  | -5                |
| Picalm        | NM_001252523         | chr7       | 97278598  | 97278874  | -5                |
| Prkcdbp       | NM_028444            | chr7       | 112630510 | 112630920 | -5                |
| Abtb2         | NM_178890            | chr2       | 103406338 | 103406585 | -5                |
| Exog          | NM_001172136         | chr9       | 119353873 | 119354198 | -5                |
| Pan2          | NM_001252327         | chr10      | 127740186 | 127740586 | -4                |
| Npm1          | NM_001252260         | chr11      | 33063004  | 33063414  | -4                |
| Pfkp          | NM_019703            | chr13      | 6647905   | 6648135   | -4                |
| Cbx5          | NM_007626            | chr15      | 103045659 | 103045913 | -4                |
| Vti1a         | NM_001293686         | chr19      | 55390363  | 55390721  | -4                |
| Polr3k        | NM_025901            | chr2       | 181598947 | 181599173 | -4                |
| Zfp111        | NM_019940            | chr7       | 24993068  | 24993274  | -4                |
| Zdhhc3        | NM_026917            | chr9       | 123022161 | 123022491 | -4                |
| Asnsd1        | NM_133728            | chr1       | 53409469  | 53409728  | -4                |
| A730008H23Rik | NM_172505            | chr1       | 90173841  | 90174428  | -4                |
| Psmd6         | NM_025550            | chr14      | 14953262  | 14953579  | -4                |
| Tfb1m         | NM_146074            | chr17      | 3557305   | 3558126   | -4                |
| Gmps          | NM_001033300         | chr3       | 63779918  | 63780203  | -4                |
| Agbl3         | NM_001289656         | chr6       | 34730203  | 34730652  | -4                |
| Zbtbd6        | NM_001034882         | chr14      | 79851432  | 79851844  | -3                |
| Eif2ak2       | NM_011163            | chr17      | 79281667  | 79282161  | -3                |

**Supplemental Table 4. Significant ChIP-seq E2F3B promoter peaks  
(+/- 2kb from the TSS)**

| Gene Symbol   | Refseq<br>Transcript ID | Chromosome | Start     | End       | distance<br>from TSS |
|---------------|-------------------------|------------|-----------|-----------|----------------------|
| Lrrc57        | NM_025657               | chr2       | 120434829 | 120435277 | -3                   |
| Gtse1         | NM_001168672            | chr15      | 85689976  | 85690291  | -3                   |
| Mybl2         | NM_008652               | chr2       | 162880010 | 162880725 | -3                   |
| C2cd3         | NM_001017985            | chr7       | 107520487 | 107520992 | -3                   |
| Shcbp1        | NM_011369               | chr8       | 4779383   | 4779688   | -3                   |
| Gm2a          | NM_010299               | chr11      | 54911317  | 54911651  | -2                   |
| Klhdc2        | NM_027117               | chr12      | 70397490  | 70397840  | -2                   |
| Rpl36         | NM_018730               | chr17      | 56752677  | 56752953  | -2                   |
| Commd10       | NM_178377               | chr18      | 47118349  | 47118705  | -2                   |
| Map1a         | NM_032393               | chr2       | 121115152 | 121115518 | -2                   |
| Fam192a       | NM_028221               | chr8       | 97125328  | 97125926  | -2                   |
| Slc7a6        | NM_178798               | chr8       | 108692613 | 108692931 | -2                   |
| Pde6d         | NM_008801               | chr1       | 88478907  | 88479246  | -2                   |
| Cyb561a3      | NM_201351               | chr19      | 10651404  | 10651885  | -2                   |
| Cept1         | NM_133869               | chr3       | 106350573 | 106350868 | -2                   |
| Ptpn13        | NM_011204               | chr5       | 103854022 | 103854395 | -2                   |
| Vrk3          | NM_133945               | chr7       | 52003761  | 52004232  | -2                   |
| Timp1         | NM_011593               | chrX       | 20447120  | 20447459  | -2                   |
| E2f7          | NM_178609               | chr10      | 110182254 | 110182784 | -1                   |
| Wrap53        | NM_144824               | chr11      | 69392652  | 69393000  | -1                   |
| Crlf3         | NM_018776               | chr11      | 79894237  | 79894749  | -1                   |
| Zfp622        | NM_144523               | chr15      | 25913935  | 25914303  | -1                   |
| B230319C09Rik | NR_028382               | chr6       | 83391456  | 83392038  | -1                   |
| Fadd          | NM_010175               | chr7       | 151768187 | 151768495 | -1                   |
| Gadd45g       | NM_011817               | chr13      | 51941841  | 51942244  | -1                   |
| Shhg9         | NR_027900               | chr17      | 24856646  | 24857173  | -1                   |
| Cav2          | NM_016900               | chr6       | 17231019  | 17231348  | -1                   |
| Gins3         | NM_030198               | chr8       | 98157251  | 98157664  | -1                   |
| Sh3bp1        | NM_009164               | chr15      | 78730033  | 78730397  | 0                    |
| Prim2         | NM_008922               | chr1       | 33726378  | 33726897  | 1                    |
| Cep83os       | NR_015524               | chr10      | 94151274  | 94151439  | 1                    |
| Cntrob        | NM_172560               | chr11      | 69137145  | 69137602  | 1                    |
| Wdr45b        | NM_025793               | chr11      | 121215571 | 121215948 | 1                    |
| Pigp          | NM_001159620            | chr16      | 94591778  | 94592093  | 1                    |
| Stom          | NM_013515               | chr2       | 35192401  | 35192654  | 1                    |
| Alg14         | NM_024178               | chr3       | 120994605 | 120994864 | 1                    |
| C2cd5         | NM_001286578            | chr6       | 143048571 | 143048770 | 1                    |
| Actn4         | NM_021895               | chr7       | 29747107  | 29747488  | 1                    |
| Plekhh2       | NM_177606               | chr17      | 84911081  | 84911389  | 1                    |
| Pmpca         | NM_173180               | chr2       | 26244750  | 26244986  | 1                    |
| 2810403A07Rik | NM_028814               | chr3       | 88489589  | 88489843  | 1                    |
| Clcc1         | NM_145543               | chr3       | 108456561 | 108457101 | 1                    |
| Pus1          | NM_001025562            | chr5       | 111209495 | 111209769 | 1                    |
| Mns1          | NM_008613               | chr9       | 72286127  | 72286545  | 1                    |
| Eif4e2        | NM_023314               | chr1       | 89110359  | 89110620  | 2                    |
| Hist1h2ah     | NM_175659               | chr13      | 22127399  | 22127620  | 2                    |
| Tarbp2        | NM_009319               | chr15      | 102348286 | 102348961 | 2                    |
| Mapk1         | NM_011949               | chr16      | 16983223  | 16983728  | 2                    |

**Supplemental Table 4. Significant ChIP-seq E2F3B promoter peaks  
(+/- 2kb from the TSS)**

| Gene Symbol | Refseq<br>Transcript ID | Chromosome | Start     | End       | distance<br>from TSS |
|-------------|-------------------------|------------|-----------|-----------|----------------------|
| Rcan1       | NM_001081549            | chr16      | 92466198  | 92466625  | 2                    |
| Ranbp3      | NM_001252467            | chr17      | 56812291  | 56813006  | 2                    |
| Pigf        | NM_008838               | chr17      | 87424515  | 87424962  | 2                    |
| Kiz         | NM_001033298            | chr2       | 146681514 | 146681737 | 2                    |
| Intu        | NM_175515               | chr3       | 40439569  | 40439810  | 2                    |
| Asxl2       | NM_001270988            | chr12      | 3426563   | 3427153   | 2                    |
| Gm9776      | NR_045619               | chr13      | 95128679  | 95129071  | 2                    |
| Pde12       | NM_178668               | chr14      | 27489073  | 27489585  | 2                    |
| Map7d1      | NM_001145970            | chr4       | 125933399 | 125933721 | 2                    |
| Taf10       | NM_020024               | chr7       | 112892701 | 112892997 | 2                    |
| Blmh        | NM_178645               | chr11      | 76758974  | 76759345  | 3                    |
| Slc25a1     | NM_153150               | chr16      | 17928073  | 17928544  | 3                    |
| Chtf18      | NM_145409               | chr17      | 25864037  | 25864676  | 3                    |
| Ints3       | NM_145540               | chr3       | 90237320  | 90237789  | 3                    |
| Abcf2       | NM_001190443            | chr5       | 24083083  | 24083480  | 3                    |
| Rfc5        | NM_028128               | chr5       | 117838766 | 117839291 | 3                    |
| Herc1       | NM_145617               | chr9       | 66198040  | 66198477  | 3                    |
| Smad5       | NM_008541               | chr13      | 56804168  | 56804578  | 3                    |
| Brd3        | NM_001113574            | chr2       | 27331084  | 27331294  | 3                    |
| Psmb7       | NM_011187               | chr2       | 38499206  | 38499638  | 3                    |
| Kbtbd8      | NM_001008785            | chr6       | 95067562  | 95068190  | 3                    |
| Ankle1      | NM_172756               | chr8       | 73929705  | 73930121  | 3                    |
| Nkap        | NM_025937               | chrX       | 34666650  | 34666870  | 3                    |
| Med12       | NM_021521               | chrX       | 98469272  | 98469592  | 3                    |
| Abl2        | NM_009595               | chr1       | 158488787 | 158489054 | 4                    |
| Shmt1       | NM_009171               | chr11      | 60624517  | 60625008  | 4                    |
| Rabl6       | NM_001024616            | chr2       | 25463792  | 25464131  | 4                    |
| Cd99l2      | NM_138309               | chrX       | 68745801  | 68746238  | 4                    |
| Ecd         | NM_027475               | chr14      | 21167181  | 21167495  | 4                    |
| Ssna1       | NM_023464               | chr2       | 25127681  | 25128185  | 4                    |
| Abca2       | NM_007379               | chr2       | 25284017  | 25284377  | 4                    |
| Ampd2       | NM_028779               | chr3       | 107889486 | 107889672 | 4                    |
| Rnaseh2a    | NM_027187               | chr8       | 87489712  | 87490098  | 4                    |
| Hmg20b      | NM_001163165            | chr10      | 80812888  | 80813443  | 5                    |
| Prps1l3     | NM_001037746            | chr12      | 58331193  | 58331612  | 5                    |
| Fancm       | NM_178912               | chr12      | 66176450  | 66176743  | 5                    |
| Nfkbil1     | NM_010909               | chr17      | 35372495  | 35373014  | 5                    |
| Grem1       | NM_011824               | chr2       | 113598643 | 113598956 | 5                    |
| Fsd1l       | NM_001195284            | chr4       | 53644198  | 53644495  | 5                    |
| Ormdl1      | NM_145517               | chr1       | 53353722  | 53354164  | 5                    |
| Kctd5       | NM_027008               | chr17      | 24210146  | 24210746  | 5                    |
| Naa40       | NM_027643               | chr19      | 7315399   | 7316013   | 5                    |
| Fam69b      | NM_019833               | chr2       | 26483887  | 26484075  | 5                    |
| Ythdf3      | NM_001145919            | chr3       | 16083000  | 16083374  | 5                    |
| Mphosph8    | NM_023773               | chr14      | 57286888  | 57287291  | 6                    |
| Csnk2b      | NM_009975               | chr17      | 35258184  | 35258587  | 6                    |
| Cep76       | NM_001081073            | chr18      | 67800860  | 67801107  | 6                    |
| Camk2d      | NM_001025438            | chr3       | 126299732 | 126300015 | 6                    |



**Supplemental Table 4. Significant ChIP-seq E2F3B promoter peaks  
(+/- 2kb from the TSS)**

| Gene Symbol   | Refseq<br>Transcript ID | Chromosome | Start     | End       | distance<br>from TSS |
|---------------|-------------------------|------------|-----------|-----------|----------------------|
| Rps16         | NM_013647               | chr7       | 29135546  | 29135879  | 6                    |
| Mir6236       | NR_105744               | chr9       | 110183645 | 110183946 | 6                    |
| 1700021F05Rik | NM_026411               | chr10      | 43260478  | 43261108  | 6                    |
| D15Ert621e    | NM_145959               | chr15      | 58246807  | 58247249  | 6                    |
| Aldh7a1       | NM_001127338            | chr18      | 56732409  | 56732763  | 6                    |
| Med9os        | NR_045273               | chr11      | 59761484  | 59761799  | 7                    |
| Atpaf2        | NM_145427               | chr11      | 60230307  | 60230880  | 7                    |
| Atad2b        | NM_001099628            | chr12      | 4923966   | 4924363   | 7                    |
| Secisbp2      | NM_029279               | chr13      | 51746894  | 51747283  | 7                    |
| Terf2         | NM_009353               | chr8       | 109620274 | 109620601 | 7                    |
| Dbr1          | NM_031403               | chr9       | 99476061  | 99476386  | 7                    |
| Smc6          | NM_025695               | chr12      | 11272509  | 11272887  | 7                    |
| Xrcc5         | NM_009533               | chr1       | 72353873  | 72354130  | 8                    |
| Rhoj          | NM_023275               | chr12      | 76409168  | 76409445  | 8                    |
| Flywch1       | NM_153791               | chr17      | 23908364  | 23908735  | 8                    |
| Osbp16        | NM_001290733            | chr2       | 76244378  | 76244765  | 8                    |
| Ppip5k2       | NM_173760               | chr1       | 99666533  | 99666787  | 8                    |
| Itsn2         | NM_001198968            | chr12      | 4599656   | 4599986   | 8                    |
| B3galnt2      | NM_178640               | chr13      | 14046699  | 14047197  | 8                    |
| Tubgcp6       | NM_001163319            | chr15      | 88953437  | 88953705  | 8                    |
| 1700123M08Rik | NR_040577               | chr4       | 11893399  | 11894057  | 8                    |
| Ano6          | NM_001253813            | chr15      | 95621132  | 95621431  | 9                    |
| Cks1b         | NM_016904               | chr3       | 89222049  | 89222358  | 9                    |
| Alg6          | NM_001081264            | chr4       | 99382120  | 99382537  | 9                    |
| Faf1          | NM_007983               | chr4       | 109349014 | 109349465 | 9                    |
| Hsph1         | NM_013559               | chr5       | 150438668 | 150439093 | 9                    |
| Apol7d        | NR_040308               | chr1       | 71699578  | 71700256  | 9                    |
| 4930563E22Rik | NM_001163728            | chr11      | 72028524  | 72028772  | 9                    |
| Gpaa1         | NM_010331               | chr15      | 76161362  | 76162102  | 9                    |
| Clpp          | NM_017393               | chr17      | 57129502  | 57129888  | 9                    |
| Tnfaip8       | NM_001177759            | chr18      | 50138908  | 50139270  | 9                    |
| Qsox2         | NM_153559               | chr2       | 26092638  | 26093222  | 9                    |
| Rpl35         | NM_025592               | chr2       | 38860472  | 38860810  | 9                    |
| Phtf1os       | NR_030676               | chr3       | 103771971 | 103772487 | 9                    |
| Pradc1        | NR_028081               | chr6       | 85401710  | 85402198  | 9                    |
| Fut10         | NM_001286425            | chr8       | 32297608  | 32298014  | 9                    |
| Sppl2b        | NM_175195               | chr10      | 80317849  | 80318208  | 10                   |
| Vrk1          | NM_011705               | chr12      | 107248308 | 107248655 | 10                   |
| Dnph1         | NM_207161               | chr17      | 46633551  | 46633942  | 10                   |
| Itrip1        | NM_001001738            | chr19      | 47993504  | 47994053  | 10                   |
| Gab1          | NM_021356               | chr8       | 83404178  | 83404557  | 10                   |
| Prim1         | NM_008921               | chr10      | 127452032 | 127452528 | 10                   |
| Npc2          | NM_023409               | chr12      | 86113763  | 86114339  | 10                   |
| Ap5s1         | NM_001291031            | chr2       | 131035945 | 131036265 | 10                   |
| Zfp821        | NM_001167946            | chr8       | 112229311 | 112229599 | 10                   |
| Vash2         | NR_027352               | chr1       | 192802978 | 192803349 | 11                   |
| Hnrnpm        | NM_029804               | chr17      | 33822188  | 33822595  | 11                   |
| Rusc2         | NM_001037709            | chr4       | 43394697  | 43395030  | 11                   |

**Supplemental Table 4. Significant ChIP-seq E2F3B promoter peaks  
(+/- 2kb from the TSS)**

| Gene Symbol   | Refseq<br>Transcript ID | Chromosome | Start     | End       | distance<br>from TSS |
|---------------|-------------------------|------------|-----------|-----------|----------------------|
| Tyms          | NM_021288               | chr5       | 30400025  | 30400282  | 11                   |
| Fam188b       | NM_001142781            | chr6       | 55153256  | 55153517  | 11                   |
| Ddx50         | NM_053183               | chr10      | 62113742  | 62114126  | 11                   |
| Mcm10         | NM_027290               | chr2       | 4933518   | 4934132   | 11                   |
| Rprd1b        | NM_001291135            | chr2       | 157853956 | 157854530 | 11                   |
| Nav2          | NM_175272               | chr7       | 56501323  | 56501815  | 11                   |
| Palb2         | NM_001081238            | chr7       | 129276336 | 129276560 | 11                   |
| Zfp560        | NM_001004190            | chr9       | 20189384  | 20189796  | 11                   |
| Msantd2       | NM_146222               | chr9       | 37296775  | 37297057  | 11                   |
| Faim          | NM_001122851            | chr9       | 98886611  | 98886993  | 11                   |
| Nme6          | NM_018757               | chr9       | 109735072 | 109735564 | 11                   |
| Ccdc57        | NM_027745               | chr11      | 120793935 | 120794412 | 12                   |
| Tango2        | NM_138583               | chr16      | 18343798  | 18344227  | 12                   |
| Slc6a17       | NM_172271               | chr3       | 107320841 | 107321006 | 12                   |
| Pms2          | NM_008886               | chr5       | 144670599 | 144671162 | 12                   |
| Prdx2         | NM_011563               | chr8       | 87493429  | 87493686  | 12                   |
| Cenpn         | NM_028131               | chr8       | 119445315 | 119445986 | 12                   |
| Gtf2f2        | NM_026816               | chr14      | 76410476  | 76410842  | 12                   |
| Dgcr8         | NM_033324               | chr16      | 18288819  | 18289677  | 12                   |
| Loh12cr1      | NM_026371               | chr6       | 134590845 | 134591093 | 12                   |
| Mcm5          | NM_008566               | chr8       | 77633121  | 77633755  | 12                   |
| Rfesd         | NM_001131069            | chr13      | 76156013  | 76156280  | 13                   |
| Smc3          | NM_007790               | chr19      | 53674809  | 53674987  | 13                   |
| Zbtb49        | NM_029162               | chr5       | 38611525  | 38611781  | 13                   |
| Polg          | NM_017462               | chr7       | 86610901  | 86611389  | 13                   |
| Frg1          | NM_013522               | chr8       | 42502280  | 42502636  | 13                   |
| Fanca         | NM_016925               | chr8       | 125842299 | 125842625 | 13                   |
| Slc12a7       | NM_011390               | chr13      | 73900995  | 73901320  | 14                   |
| Slc35a5       | NM_028756               | chr16      | 45158606  | 45158937  | 14                   |
| Rfc3          | NM_027009               | chr5       | 152453612 | 152453925 | 14                   |
| 9430015G10Rik | NM_145557               | chr4       | 155483818 | 155484422 | 14                   |
| Msn           | NM_010833               | chrX       | 93291223  | 93291571  | 14                   |
| Endov         | NM_001164636            | chr11      | 119352464 | 119352885 | 15                   |
| Pcbd2         | NM_028281               | chr13      | 55828566  | 55828919  | 15                   |
| Nrm           | NM_134122               | chr17      | 35997998  | 35998555  | 15                   |
| Tdp1          | NM_028354               | chr12      | 101122601 | 101122877 | 15                   |
| Kif20b        | NM_183046               | chr19      | 34996736  | 34996988  | 15                   |
| Yif1b         | NM_001110201            | chr7       | 30023178  | 30023534  | 15                   |
| Tomm20        | NM_024214               | chr8       | 129469662 | 129469948 | 15                   |
| Rbfox2        | NM_175387               | chr15      | 77137134  | 77137799  | 16                   |
| Mrpl40        | NM_010922               | chr16      | 18876308  | 18877119  | 16                   |
| Polq          | NM_029977               | chr16      | 37011663  | 37012110  | 16                   |
| Trappc5       | NM_025701               | chr8       | 3676317   | 3676666   | 16                   |
| Zfp62         | NM_009562               | chr11      | 49016831  | 49017203  | 16                   |
| Bora          | NM_175265               | chr14      | 99445423  | 99445799  | 16                   |
| Zfp568        | NM_001167872            | chr7       | 30768885  | 30769093  | 16                   |
| Tubgcp2       | NM_001286011            | chr7       | 147222100 | 147222364 | 16                   |
| Bok           | NM_016778               | chr1       | 95582111  | 95582462  | 17                   |

**Supplemental Table 4. Significant ChIP-seq E2F3B promoter peaks  
(+/- 2kb from the TSS)**

| Gene Symbol   | Refseq<br>Transcript ID | Chromosome | Start     | End       | distance<br>from TSS |
|---------------|-------------------------|------------|-----------|-----------|----------------------|
| Rnf217        | NM_001146349            | chr10      | 31329366  | 31329661  | 17                   |
| Aars2         | NM_198608               | chr17      | 45643653  | 45643958  | 17                   |
| Trpt1         | NM_153597               | chr19      | 7070516   | 7070757   | 17                   |
| Mir5122       | NR_039582               | chr4       | 132925497 | 132925916 | 17                   |
| Arpc1b        | NM_023142               | chr5       | 145875024 | 145875257 | 17                   |
| Sertad1       | NM_018820               | chr7       | 28271826  | 28272149  | 17                   |
| Smad6         | NM_008542               | chr9       | 63869617  | 63870080  | 17                   |
| Tmem64        | NM_181401               | chr4       | 15192811  | 15193155  | 17                   |
| Plekhg2       | NM_001290542            | chr7       | 29157340  | 29157986  | 17                   |
| Coq10b        | NM_001039710            | chr1       | 55109472  | 55109789  | 18                   |
| Tmem107       | NM_028336               | chr11      | 68884025  | 68884630  | 18                   |
| Cpd           | NM_007754               | chr11      | 76660352  | 76660631  | 18                   |
| Puf60         | NM_133691               | chr15      | 75911041  | 75911674  | 18                   |
| 4930483J18Rik | NR_015603               | chr15      | 81021152  | 81021447  | 18                   |
| Mesdc1        | NM_030705               | chr7       | 91032628  | 91033037  | 18                   |
| Mrm1          | NM_145433               | chr11      | 84632775  | 84633221  | 18                   |
| Fkbp3         | NM_013902               | chr12      | 66174568  | 66175244  | 18                   |
| Spata13       | NM_001033272            | chr14      | 61253344  | 61253822  | 18                   |
| Itsn1         | NM_010587               | chr16      | 91729397  | 91729869  | 18                   |
| Atg16l1       | NM_029846               | chr1       | 89652434  | 89652773  | 19                   |
| Pask          | NM_080850               | chr1       | 95239018  | 95239673  | 19                   |
| Rad51c        | NM_053269               | chr11      | 87217671  | 87218284  | 19                   |
| Cbwd1         | NM_146097               | chr19      | 25035895  | 25036278  | 19                   |
| Kirrel        | NM_001170985            | chr3       | 86978515  | 86978784  | 19                   |
| 4833439L19Rik | NM_001252648            | chr13      | 54666594  | 54666852  | 19                   |
| Fbxo42        | NM_172518               | chr4       | 140703662 | 140704048 | 19                   |
| Eif4g1        | NM_145941               | chr16      | 20672664  | 20673017  | 20                   |
| Tbc1d5        | NM_028162               | chr17      | 51318363  | 51318950  | 20                   |
| Psmf1         | NM_212446               | chr2       | 151566871 | 151567146 | 20                   |
| Mmab          | NM_029956               | chr5       | 114893717 | 114894314 | 20                   |
| Mitf          | NM_001113198            | chr6       | 97756892  | 97757249  | 20                   |
| Dhx9          | NM_007842               | chr1       | 155334557 | 155334981 | 20                   |
| 1810032O08Rik | NR_027821               | chr11      | 116532836 | 116533150 | 20                   |
| Itpr3         | NM_080553               | chr17      | 27194094  | 27194442  | 20                   |
| Kif23         | NM_024245               | chr9       | 61794360  | 61794810  | 20                   |
| Nup155        | NM_133227               | chr15      | 8059005   | 8059660   | 21                   |
| 1700007L15Rik | NR_045709               | chr16      | 33380666  | 33380935  | 21                   |
| Map6          | NM_001043355            | chr7       | 106416627 | 106417124 | 21                   |
| 2700029M09Rik | NM_028299               | chr8       | 63368945  | 63369590  | 21                   |
| Ppp3r1        | NM_024459               | chr11      | 17059201  | 17059441  | 21                   |
| Srsf1         | NM_001078167            | chr11      | 87860666  | 87861124  | 21                   |
| Spsb3         | NM_001163750            | chr17      | 25023440  | 25023838  | 21                   |
| Gt(ROSA)26Sor | NR_027010               | chr6       | 113027023 | 113027409 | 21                   |
| Ccnb2         | NM_007630               | chr9       | 70269174  | 70269504  | 21                   |
| 4930429F24Rik | NR_040734               | chr9       | 79641295  | 79641641  | 21                   |
| Ttc21a        | NM_028735               | chr9       | 119846551 | 119846937 | 21                   |
| Kif15         | NM_010620               | chr9       | 122859995 | 122860443 | 21                   |
| Kif2c         | NM_134471               | chr4       | 116855045 | 116855368 | 22                   |

**Supplemental Table 4. Significant ChIP-seq E2F3B promoter peaks  
(+/- 2kb from the TSS)**

| Gene Symbol   | Refseq<br>Transcript ID | Chromosome | Start     | End       | distance<br>from TSS |
|---------------|-------------------------|------------|-----------|-----------|----------------------|
| Slc25a40      | NM_178766               | chr5       | 8422623   | 8423094   | 22                   |
| Gfod2         | NM_027469               | chr8       | 108282315 | 108282654 | 22                   |
| Rpl19         | NM_009078               | chr11      | 97888090  | 97888428  | 22                   |
| Pex12         | NM_134025               | chr11      | 83112314  | 83112597  | 23                   |
| Dync1li2      | NM_001013380            | chr8       | 106966802 | 106967045 | 23                   |
| Exosc6        | NM_028274               | chr8       | 113580042 | 113580479 | 23                   |
| Pold2         | NM_008894               | chr11      | 5777998   | 5778472   | 23                   |
| Hint1         | NM_008248               | chr11      | 54679782  | 54680142  | 23                   |
| Pfas          | NM_001159519            | chr11      | 68821747  | 68822129  | 23                   |
| Cpsf1         | NM_001164173            | chr15      | 76437737  | 76438257  | 23                   |
| Mrpl17        | NM_025301               | chr7       | 112959344 | 112959810 | 23                   |
| Abce1         | NM_015751               | chr8       | 82235461  | 82235769  | 23                   |
| Cct2          | NM_007636               | chr10      | 116500557 | 116501134 | 24                   |
| Ect2          | NM_001177625            | chr3       | 27052632  | 27052871  | 24                   |
| Rfc1          | NM_011258               | chr5       | 65726650  | 65727057  | 24                   |
| Esyt2         | NM_028731               | chr12      | 117519172 | 117520264 | 24                   |
| Nhp2l1        | NM_011482               | chr15      | 81877824  | 81878182  | 24                   |
| 5430402O13Rik | NR_015581               | chr6       | 50516463  | 50516867  | 24                   |
| Als2          | NM_028717               | chr1       | 59293900  | 59294199  | 25                   |
| Tdp2          | NM_019551               | chr13      | 24923424  | 24923679  | 25                   |
| AI413582      | NM_001002895            | chr17      | 27702407  | 27702886  | 25                   |
| Psmc5         | NM_080554               | chr2       | 34726232  | 34726681  | 25                   |
| Alad          | NM_001276446            | chr4       | 62180742  | 62181093  | 25                   |
| Nup205        | NM_027513               | chr6       | 35127512  | 35127767  | 25                   |
| Man2c1        | NM_028636               | chr9       | 56978453  | 56978762  | 25                   |
| Depdc1a       | NM_001172092            | chr3       | 159158216 | 159158626 | 25                   |
| Chka          | NM_001271496            | chr19      | 3851531   | 3852064   | 26                   |
| Cactin        | NM_027381               | chr10      | 80783658  | 80784088  | 26                   |
| Wasl          | NM_028459               | chr6       | 24614791  | 24615145  | 26                   |
| Dguok         | NM_013764               | chr6       | 83456783  | 83457089  | 26                   |
| 2310036O22Rik | NM_026760               | chr8       | 87550613  | 87550901  | 26                   |
| Wasf1         | NM_031877               | chr10      | 40603194  | 40603537  | 27                   |
| Bbip1         | NM_001195348            | chr19      | 54018911  | 54019268  | 27                   |
| Eif2b1        | NM_145371               | chr5       | 125028868 | 125029209 | 27                   |
| Zfp414        | NM_026712               | chr17      | 33765777  | 33766349  | 27                   |
| Ncaph         | NM_144818               | chr2       | 126959348 | 126959976 | 27                   |
| Itpril1       | NM_001163527            | chr2       | 126969081 | 126969249 | 27                   |
| Atg16l2       | NM_001111111            | chr7       | 108450406 | 108450742 | 27                   |
| Rrp8          | NM_025897               | chr7       | 112884844 | 112885296 | 27                   |
| Bckdk         | NM_009739               | chr7       | 135047422 | 135047804 | 27                   |
| 1700030K09Rik | NM_028170               | chr8       | 74967634  | 74967976  | 27                   |
| Cep57         | NM_026665               | chr9       | 13631383  | 13631663  | 27                   |
| Ascc3         | NM_198007               | chr10      | 50312226  | 50312777  | 28                   |
| Atad5         | NM_001029856            | chr11      | 79902789  | 79903068  | 28                   |
| Ube2z         | NM_172300               | chr11      | 95926449  | 95926850  | 28                   |
| 6030458C11Rik | NM_029998               | chr15      | 12754144  | 12754623  | 28                   |
| C030006K11Rik | NM_145472               | chr15      | 76554069  | 76554424  | 28                   |
| Sac3d1        | NM_133678               | chr19      | 6118413   | 6118702   | 28                   |

**Supplemental Table 4. Significant ChIP-seq E2F3B promoter peaks  
(+/- 2kb from the TSS)**

| Gene Symbol   | Refseq<br>Transcript ID | Chromosome | Start     | End       | distance<br>from TSS |
|---------------|-------------------------|------------|-----------|-----------|----------------------|
| Paxip1        | NM_018878               | chr5       | 28117907  | 28118216  | 28                   |
| Nup133        | NM_172288               | chr8       | 126472977 | 126473296 | 28                   |
| Birc5         | NM_001012273            | chr11      | 117710453 | 117710703 | 28                   |
| Stxbp6        | NM_144552               | chr12      | 46175264  | 46175618  | 28                   |
| Tipin         | NM_025372               | chr9       | 64129238  | 64129644  | 28                   |
| Mon2          | NM_001163025            | chr10      | 122513367 | 122513696 | 29                   |
| C1d           | NM_020558               | chr11      | 17157452  | 17157845  | 29                   |
| Myo19         | NM_025414               | chr11      | 84693561  | 84693938  | 29                   |
| Map4k5        | NM_201519               | chr12      | 70993977  | 70994264  | 29                   |
| March5        | NM_027314               | chr19      | 37281929  | 37282196  | 29                   |
| Slc35c1       | NM_211358               | chr2       | 92299808  | 92300035  | 29                   |
| Fkbp1a        | NM_008019               | chr2       | 151368025 | 151368500 | 29                   |
| Smpdl3b       | NM_133888               | chr4       | 132312911 | 132313202 | 29                   |
| Cbln1         | NM_019626               | chr8       | 89996193  | 89996730  | 29                   |
| Ubxn4         | NM_026390               | chr1       | 130140530 | 130141042 | 29                   |
| Ndufaf2       | NM_001127346            | chr13      | 108948587 | 108948991 | 29                   |
| Use1          | NM_001145780            | chr8       | 73890679  | 73890871  | 29                   |
| 4931428F04Rik | NM_001166394            | chr8       | 107813163 | 107813633 | 29                   |
| Ahi1          | NM_026203               | chr10      | 20672161  | 20672602  | 30                   |
| Tbpl1         | NM_011603               | chr10      | 22451047  | 22451398  | 30                   |
| Rab10         | NM_016676               | chr12      | 3309728   | 3310149   | 30                   |
| Gm20604       | NM_001142939            | chr12      | 103995642 | 103996337 | 30                   |
| Cenpe         | NM_173762               | chr3       | 134875427 | 134875684 | 30                   |
| Tubgcp3       | NM_198031               | chr8       | 12671814  | 12672325  | 30                   |
| Zfp39         | NM_011758               | chr11      | 58717541  | 58717851  | 30                   |
| Micall1       | NM_177461               | chr15      | 78939221  | 78939663  | 30                   |
| Tab1          | NM_025609               | chr15      | 79963381  | 79963845  | 30                   |
| Rad51         | NM_011234               | chr2       | 118938441 | 118938723 | 30                   |
| Impa1         | NM_018864               | chr3       | 10331277  | 10331539  | 30                   |
| Cyp51         | NM_020010               | chr5       | 4104314   | 4105018   | 30                   |
| Prpf4b        | NM_013830               | chr13      | 34967216  | 34967569  | 31                   |
| Ythdf2        | NM_145393               | chr4       | 131767919 | 131768360 | 31                   |
| Klhl21        | NM_001033352            | chr4       | 151382780 | 151383279 | 31                   |
| Ahsa1         | NM_146036               | chr12      | 88607563  | 88607853  | 31                   |
| Morc3         | NM_001045529            | chr16      | 93832217  | 93832575  | 31                   |
| Atp10a        | NM_009728               | chr7       | 65913376  | 65913828  | 31                   |
| Ptxdc1        | NM_001163608            | chr11      | 97847499  | 97847956  | 32                   |
| Dusp11        | NM_028099               | chr6       | 85911478  | 85911779  | 32                   |
| Ttk           | NM_009445               | chr9       | 83728163  | 83728490  | 32                   |
| Zc3h12c       | NM_001162921            | chr9       | 51975904  | 51976462  | 32                   |
| Cyb5r3        | NM_029787               | chr15      | 83002371  | 83002838  | 33                   |
| Pigu          | NM_001004721            | chr2       | 155182936 | 155183317 | 33                   |
| BC029722      | NR_015528               | chr2       | 155644711 | 155645100 | 33                   |
| Usp19         | NM_001168373            | chr9       | 108392854 | 108393223 | 33                   |
| Polr2a        | NM_001291068            | chr11      | 69571882  | 69572320  | 33                   |
| Wsb1          | NM_019653               | chr11      | 79067930  | 79068396  | 33                   |
| Stambpl1      | NM_029682               | chr19      | 34266650  | 34266934  | 33                   |
| Bcl2l1        | NM_009743               | chr2       | 152657300 | 152657560 | 33                   |

**Supplemental Table 4. Significant ChIP-seq E2F3B promoter peaks  
(+/- 2kb from the TSS)**

| Gene Symbol | Refseq<br>Transcript ID | Chromosome | Start     | End       | distance<br>from TSS |
|-------------|-------------------------|------------|-----------|-----------|----------------------|
| Ehd2        | NM_153068               | chr7       | 16552691  | 16553009  | 33                   |
| Vps4a       | NM_126165               | chr8       | 109555074 | 109555442 | 33                   |
| Sp2         | NM_030220               | chr11      | 96838573  | 96839362  | 34                   |
| Slc29a1     | NM_001199116            | chr17      | 45732267  | 45732706  | 34                   |
| Atf3        | NM_146091               | chr19      | 7568793   | 7569128   | 34                   |
| Hk1         | NM_001146100            | chr10      | 61802850  | 61803418  | 34                   |
| Sart3       | NM_016926               | chr5       | 114221459 | 114221787 | 34                   |
| Gapdh       | NM_008084               | chr6       | 125115608 | 125115904 | 34                   |
| Fhl2        | NM_010212               | chr1       | 43220565  | 43220976  | 35                   |
| Frmd6       | NM_028127               | chr12      | 71926373  | 71926696  | 35                   |
| Fam173b     | NM_026546               | chr15      | 31531710  | 31532099  | 35                   |
| Rfc4        | NM_145480               | chr16      | 23127502  | 23128033  | 35                   |
| Ntng1       | NM_030699               | chr3       | 109946215 | 109946494 | 35                   |
| Kif24       | NM_024241               | chr4       | 41411630  | 41412061  | 35                   |
| Snrnp48     | NM_026382               | chr13      | 38296643  | 38297041  | 35                   |
| Thoc3       | NM_028597               | chr13      | 54570002  | 54570328  | 35                   |
| Pigq        | NM_011822               | chr17      | 26078687  | 26079109  | 35                   |
| Scfd2       | NM_001114660            | chr5       | 74927538  | 74927924  | 35                   |
| Nagk        | NM_019542               | chr6       | 83744843  | 83745327  | 35                   |
| Hist1h2ad   | NM_178188               | chr13      | 23666139  | 23666430  | 36                   |
| Pgs1        | NM_133757               | chr11      | 117848046 | 117848366 | 36                   |
| Eif4b       | NM_145625               | chr15      | 101903955 | 101904523 | 36                   |
| Arhgap31    | NM_020260               | chr16      | 38712823  | 38713399  | 36                   |
| Kif18a      | NM_139303               | chr2       | 109120688 | 109121172 | 36                   |
| Gtf3c2      | NM_027901               | chr5       | 31482223  | 31482737  | 36                   |
| Mad2l1      | NM_019499               | chr6       | 66485272  | 66485722  | 36                   |
| Slc7a6os    | NM_001007567            | chr8       | 108734595 | 108734997 | 36                   |
| Eif3a       | NM_010123               | chr19      | 60866276  | 60866841  | 37                   |
| Nelfcd      | NM_020580               | chr2       | 174241182 | 174241499 | 37                   |
| Adprhl2     | NM_133883               | chr4       | 125998630 | 125999189 | 37                   |
| Pafah1b2    | NM_008775               | chr9       | 45792698  | 45793135  | 37                   |
| Med22       | NM_001033908            | chr2       | 26765945  | 26766303  | 37                   |
| Ada         | NM_001272052            | chr2       | 163575716 | 163576158 | 37                   |
| Cdc42       | NM_009861               | chr4       | 136913464 | 136913808 | 37                   |
| Med28       | NM_025895               | chr5       | 45911345  | 45911663  | 37                   |
| Agfg2       | NM_178162               | chr5       | 138125622 | 138125992 | 37                   |
| Hccs        | NM_008222               | chrX       | 165758015 | 165758459 | 37                   |
| Mitd1       | NM_026913               | chr1       | 37947053  | 37947382  | 38                   |
| Tm9sf2      | NM_080556               | chr14      | 122506071 | 122506610 | 38                   |
| Msh5        | NM_001146215            | chr17      | 35183266  | 35183993  | 38                   |
| Mdc1        | NM_001010833            | chr17      | 35978029  | 35978930  | 38                   |
| Sipa1       | NM_001164568            | chr19      | 5663474   | 5663863   | 38                   |
| Tpd52l2     | NM_001291204            | chr2       | 181231678 | 181232089 | 38                   |
| Gpsm2       | NM_029522               | chr3       | 108524961 | 108525396 | 38                   |
| Stmn1       | NM_019641               | chr4       | 134024134 | 134024409 | 38                   |
| Gm20554     | NR_030701               | chr13      | 72765823  | 72766123  | 38                   |
| Mnd1        | NM_029797               | chr3       | 83959536  | 83959802  | 38                   |
| Ndufa5      | NM_026614               | chr6       | 24477544  | 24477752  | 38                   |

**Supplemental Table 4. Significant ChIP-seq E2F3B promoter peaks  
(+/- 2kb from the TSS)**

| Gene Symbol   | Refseq<br>Transcript ID | Chromosome | Start     | End       | distance<br>from TSS |
|---------------|-------------------------|------------|-----------|-----------|----------------------|
| Csgalnact1    | NM_172753               | chr8       | 71258783  | 71259229  | 38                   |
| Cyp20a1       | NM_030013               | chr1       | 60400043  | 60400464  | 39                   |
| Xrcc4         | NM_028012               | chr13      | 90228948  | 90229399  | 39                   |
| Atp5g3        | NM_175015               | chr2       | 73749135  | 73749488  | 39                   |
| Kansl3        | NM_172652               | chr1       | 36425829  | 36426143  | 39                   |
| Dnajc9        | NM_134081               | chr14      | 21207898  | 21208285  | 40                   |
| Tef           | NM_153484               | chr15      | 81632958  | 81633325  | 40                   |
| Lonp1         | NM_028782               | chr17      | 56766095  | 56766476  | 40                   |
| Gabpb1        | NM_001271469            | chr2       | 126501138 | 126501437 | 40                   |
| Zfp11         | NM_172462               | chr5       | 130175755 | 130176090 | 40                   |
| Rnf121        | NM_029211               | chr7       | 109213407 | 109213804 | 40                   |
| Tfg           | NM_019678               | chr16      | 56717346  | 56717698  | 40                   |
| Atp2c1        | NM_001253834            | chr9       | 105397235 | 105397609 | 40                   |
| Psmc3         | NM_009439               | chr11      | 98543729  | 98544086  | 41                   |
| 5830415F09Rik | NM_029086               | chr4       | 46401928  | 46402579  | 41                   |
| Iqck          | NM_001081446            | chr7       | 125999150 | 125999507 | 41                   |
| Adpgk         | NM_028121               | chr9       | 59139206  | 59139631  | 41                   |
| Gm10474       | NR_033481               | chrX       | 65931367  | 65931698  | 41                   |
| Pdia6         | NM_027959               | chr12      | 17273261  | 17273621  | 41                   |
| Copg2         | NM_017478               | chr6       | 30846525  | 30846979  | 41                   |
| Zfp9          | NM_011763               | chr6       | 118429116 | 118429382 | 41                   |
| Pxylp1        | NM_153420               | chr9       | 96789680  | 96790022  | 41                   |
| Rpl14         | NM_025974               | chr9       | 120480439 | 120480909 | 41                   |
| Wdr6          | NM_031392               | chr9       | 108480568 | 108481349 | 42                   |
| Sh3pxd2a      | NM_008018               | chr19      | 47538705  | 47539011  | 42                   |
| Mtrr          | NM_172480               | chr13      | 68720611  | 68721298  | 43                   |
| Mrpl28        | NM_024227               | chr17      | 26260198  | 26260781  | 43                   |
| Emc8          | NM_010926               | chr8       | 123191714 | 123192223 | 43                   |
| Kiss1r        | NM_053244               | chr10      | 79379599  | 79379917  | 43                   |
| Ttbk2         | NM_080788               | chr2       | 120676095 | 120676456 | 44                   |
| Mcm2          | NM_008564               | chr6       | 88848490  | 88848969  | 44                   |
| Slc41a3       | NM_027868               | chr6       | 90554788  | 90555045  | 44                   |
| Uba2          | NM_016682               | chr7       | 34953308  | 34953699  | 44                   |
| Ddx28         | NM_028038               | chr8       | 108535182 | 108535501 | 44                   |
| Mrps9         | NM_023514               | chr1       | 42908037  | 42908205  | 44                   |
| Cherp         | NM_138585               | chr8       | 74998660  | 74999514  | 44                   |
| Cnot10        | NM_153585               | chr9       | 114548985 | 114549561 | 44                   |
| Gabpb2        | NM_172512               | chr3       | 95021460  | 95022177  | 45                   |
| Steap2        | NM_001285471            | chr5       | 5693859   | 5694228   | 45                   |
| Serhl         | NM_023475               | chr15      | 82930454  | 82930904  | 45                   |
| Znhit2        | NM_013859               | chr19      | 6061097   | 6061405   | 45                   |
| Htra2         | NM_019752               | chr6       | 83004264  | 83004774  | 45                   |
| Bhlhe40       | NM_011498               | chr6       | 108610580 | 108610754 | 45                   |
| Palld         | NM_001293774            | chr8       | 64069745  | 64070095  | 45                   |
| Neo1          | NM_001042752            | chr9       | 58883997  | 58884407  | 45                   |
| Srxn1         | NM_029688               | chr2       | 151931026 | 151931583 | 46                   |
| Acat1         | NM_144784               | chr9       | 53418186  | 53418631  | 46                   |
| Nup107        | NM_134010               | chr10      | 117229541 | 117229887 | 46                   |

**Supplemental Table 4. Significant ChIP-seq E2F3B promoter peaks  
(+/- 2kb from the TSS)**

| Gene Symbol   | Refseq<br>Transcript ID | Chromosome | Start     | End       | distance<br>from TSS |
|---------------|-------------------------|------------|-----------|-----------|----------------------|
| Etaa1         | NM_026576               | chr11      | 17853633  | 17854029  | 46                   |
| Kif20a        | NM_009004               | chr18      | 34784397  | 34784873  | 46                   |
| Rfc2          | NM_020022               | chr5       | 135058456 | 135058754 | 46                   |
| Fancd2        | NM_001033244            | chr6       | 113481513 | 113481929 | 46                   |
| Psen2         | NM_001128605            | chr1       | 182186180 | 182186587 | 47                   |
| Wdr81         | NM_138950               | chr11      | 75268033  | 75268310  | 47                   |
| Zfat          | NM_198644               | chr15      | 68089934  | 68090807  | 47                   |
| Golim4        | NM_001291069            | chr3       | 75760664  | 75760983  | 47                   |
| Aagab         | NM_025857               | chr9       | 63450272  | 63450743  | 47                   |
| Sptssa        | NM_134054               | chr12      | 55757264  | 55757758  | 47                   |
| Phf1          | NM_009343               | chr17      | 27069886  | 27070350  | 47                   |
| Rce1          | NM_023131               | chr19      | 4625349   | 4625789   | 47                   |
| Dclre1a       | NM_018831               | chr19      | 56622458  | 56622870  | 47                   |
| Lnp           | NM_027133               | chr2       | 74416741  | 74417173  | 47                   |
| Usp10         | NM_009462               | chr8       | 122434580 | 122435016 | 47                   |
| Lrch1         | NM_001033439            | chr14      | 75347447  | 75347824  | 48                   |
| Ptprs         | NM_001252456            | chr17      | 56601348  | 56601843  | 48                   |
| Ganab         | NM_001293621            | chr19      | 8972379   | 8972808   | 48                   |
| Eef1g         | NM_026007               | chr19      | 9041343   | 9041812   | 48                   |
| Arap1         | NM_001040111            | chr7       | 108496467 | 108496792 | 48                   |
| Cnksr3        | NM_172546               | chr10      | 3134085   | 3134617   | 48                   |
| Wdr90         | NM_001163766            | chr17      | 25998243  | 25998579  | 48                   |
| Dym           | NM_027727               | chr18      | 75178299  | 75178647  | 48                   |
| Apbb1ip       | NM_019456               | chr2       | 22629752  | 22630036  | 48                   |
| Tmem165       | NM_011626               | chr5       | 76612786  | 76613118  | 48                   |
| Rmnd5a        | NM_024288               | chr6       | 71390446  | 71390718  | 48                   |
| Pkmyt1        | NM_023058               | chr17      | 23863114  | 23863587  | 49                   |
| 5730508B09Rik | NM_027482               | chr3       | 127599063 | 127599320 | 49                   |
| Mms22l        | NM_199467               | chr4       | 24423448  | 24423865  | 49                   |
| Rps15         | NM_009091               | chr10      | 79754967  | 79755481  | 49                   |
| Tbp           | NM_013684               | chr17      | 15636703  | 15637097  | 49                   |
| Hps5          | NM_001167864            | chr7       | 54050908  | 54051494  | 49                   |
| Mtmr2         | NM_023858               | chr9       | 13553498  | 13553848  | 49                   |
| Polr1b        | NM_009086               | chr2       | 128926636 | 128926925 | 50                   |
| Haus5         | NM_027999               | chr7       | 31449765  | 31450160  | 50                   |
| Ulk2          | NM_013881               | chr11      | 61668341  | 61668745  | 50                   |
| Dcakd         | NM_026551               | chr11      | 102878266 | 102878554 | 50                   |
| Erlin2        | NM_153592               | chr8       | 28134119  | 28134521  | 50                   |
| 2010320M18Rik | NR_029440               | chr8       | 73300675  | 73300945  | 50                   |
| Guk1          | NM_008193               | chr11      | 59005222  | 59005583  | 51                   |
| Ccdc34        | NM_026613               | chr2       | 109857828 | 109858219 | 51                   |
| Atf6b         | NM_017406               | chr17      | 34784017  | 34784266  | 52                   |
| Rpia          | NM_009075               | chr6       | 70741773  | 70742459  | 52                   |
| Rps3          | NM_012052               | chr7       | 106632051 | 106632281 | 52                   |
| Eral1         | NM_022313               | chr11      | 77893699  | 77893964  | 53                   |
| Taf3          | NM_027748               | chr2       | 9970020   | 9970345   | 53                   |
| Cad           | NM_023525               | chr5       | 31357079  | 31357330  | 53                   |
| Timm17a       | NM_011590               | chr1       | 137210098 | 137210422 | 53                   |



**Supplemental Table 4. Significant ChIP-seq E2F3B promoter peaks  
(+/- 2kb from the TSS)**

| Gene Symbol   | Refseq<br>Transcript ID | Chromosome | Start     | End       | distance<br>from TSS |
|---------------|-------------------------|------------|-----------|-----------|----------------------|
| Sipa11        | NM_001167983            | chr12      | 83270876  | 83271234  | 53                   |
| Ppp2r5c       | NM_012023               | chr12      | 111723872 | 111724130 | 53                   |
| Mut           | NM_008650               | chr17      | 41071301  | 41072071  | 53                   |
| Zwilch        | NM_026507               | chr9       | 64020464  | 64020903  | 54                   |
| Cldn25        | NM_001252451            | chr16      | 58727933  | 58728219  | 54                   |
| Pcgf1         | NM_197992               | chr6       | 83028254  | 83028620  | 54                   |
| Nipa2         | NM_001256133            | chr7       | 63217624  | 63217992  | 54                   |
| Sec63         | NM_153055               | chr10      | 42481119  | 42481592  | 55                   |
| Mettl25       | NM_207522               | chr10      | 105278107 | 105278654 | 55                   |
| Casp7         | NM_007611               | chr19      | 56471486  | 56471859  | 55                   |
| Prkab1        | NM_031869               | chr5       | 116474116 | 116474647 | 55                   |
| Incenp        | NM_016692               | chr19      | 9973763   | 9974171   | 55                   |
| Fzd1          | NM_021457               | chr5       | 4757964   | 4758356   | 55                   |
| Fancl         | NM_001277273            | chr11      | 26286955  | 26287322  | 56                   |
| Mpdu1         | NM_011900               | chr11      | 69475832  | 69476343  | 56                   |
| Spag5         | NM_017407               | chr11      | 78114938  | 78115357  | 56                   |
| Atg10         | NM_025770               | chr13      | 91363359  | 91363712  | 56                   |
| Wdr34         | NM_001008498            | chr2       | 29904084  | 29904601  | 56                   |
| Rad23a        | NM_001297606            | chr8       | 87364313  | 87364702  | 56                   |
| Pkm           | NM_001253883            | chr9       | 59504062  | 59504397  | 56                   |
| Abrac1        | NM_028440               | chr10      | 17742638  | 17743364  | 56                   |
| 2700046G09Rik | NR_033198               | chr19      | 32463609  | 32463913  | 56                   |
| Usp39         | NM_138592               | chr6       | 72294906  | 72295318  | 56                   |
| Scap          | NM_001001144            | chr9       | 110235733 | 110236097 | 56                   |
| Nab2          | NM_008668               | chr10      | 127103508 | 127103895 | 57                   |
| Ep400         | NM_029337               | chr5       | 111199432 | 111199925 | 57                   |
| Appl2         | NM_145220               | chr10      | 83111198  | 83111503  | 58                   |
| Timp2         | NM_011594               | chr11      | 118216426 | 118216907 | 58                   |
| Rnaseh1       | NM_011275               | chr12      | 29334421  | 29334626  | 58                   |
| Ddx46         | NM_001282055            | chr13      | 55736193  | 55736640  | 58                   |
| Zfp451        | NM_001290699            | chr1       | 33871212  | 33871550  | 58                   |
| Ciz1          | NM_001252536            | chr2       | 32218399  | 32218775  | 58                   |
| 2610002J02Rik | NM_001190445            | chr4       | 154623895 | 154624369 | 58                   |
| Zscan22       | NM_001290440            | chr7       | 13483029  | 13483401  | 58                   |
| Mfhas1        | NM_001081279            | chr8       | 36650676  | 36651142  | 58                   |
| Rbm6          | NM_029169               | chr9       | 107774819 | 107775363 | 58                   |
| Ttc32         | NM_029321               | chr12      | 9036663   | 9037058   | 59                   |
| 2610020C07Rik | NR_038156               | chr16      | 11203356  | 11203711  | 59                   |
| Ptpm          | NM_008984               | chr17      | 67703589  | 67703890  | 59                   |
| Kdelr2        | NM_025841               | chr5       | 144165317 | 144165796 | 59                   |
| Mthfd2        | NM_008638               | chr6       | 83267372  | 83267705  | 59                   |
| Gemin4        | NM_177367               | chr11      | 76030743  | 76031285  | 59                   |
| Fgfr1         | NM_001079908            | chr8       | 26629124  | 26629454  | 59                   |
| Atxn7l3b      | NM_001033474            | chr10      | 112365749 | 112366294 | 60                   |
| Ankrd54       | NM_144849               | chr15      | 78892917  | 78893540  | 60                   |
| Cenpw         | NM_001109747            | chr10      | 29920042  | 29920528  | 60                   |
| Tmem206       | NM_025864               | chr1       | 193149771 | 193150036 | 61                   |
| Ctgf          | NM_010217               | chr10      | 24315082  | 24315533  | 61                   |

**Supplemental Table 4. Significant ChIP-seq E2F3B promoter peaks  
(+/- 2kb from the TSS)**

| Gene Symbol   | Refseq<br>Transcript ID | Chromosome | Start     | End       | distance<br>from TSS |
|---------------|-------------------------|------------|-----------|-----------|----------------------|
| Scarb2        | NM_007644               | chr5       | 92934385  | 92934760  | 61                   |
| Mtch1         | NM_019880               | chr17      | 29484618  | 29484956  | 61                   |
| Tle1          | NM_011599               | chr4       | 71861706  | 71862024  | 61                   |
| Atp5j2        | NM_020582               | chr5       | 145952202 | 145952596 | 61                   |
| Hmbs          | NM_013551               | chr9       | 44152027  | 44152471  | 61                   |
| Cstf2         | NM_133196               | chrX       | 130593615 | 130593935 | 61                   |
| Zfp275        | NM_001160229            | chrX       | 70587833  | 70588208  | 62                   |
| Kif5b         | NM_008448               | chr18      | 6241252   | 6241666   | 62                   |
| Spc25         | NM_025565               | chr2       | 69043887  | 69044481  | 62                   |
| Apitd1        | NM_027263               | chr4       | 148511349 | 148511943 | 62                   |
| 1700028E10Rik | NR_045700               | chr5       | 152170856 | 152171766 | 62                   |
| Ccdc15        | NM_001081429            | chr9       | 37155707  | 37156121  | 62                   |
| Hace1         | NM_172473               | chr10      | 45297545  | 45297848  | 63                   |
| Atr           | NM_019864               | chr9       | 95757828  | 95758327  | 63                   |
| Rpa1          | NM_001164223            | chr11      | 75161453  | 75162189  | 63                   |
| Glod4         | NM_026029               | chr11      | 76056902  | 76057372  | 63                   |
| 1700086O06Rik | NR_027904               | chr18      | 38410002  | 38410308  | 63                   |
| Xrcc6         | NM_010247               | chr15      | 81846619  | 81847104  | 64                   |
| Prpf19        | NM_134129               | chr19      | 10969500  | 10970067  | 64                   |
| D3Ertd751e    | NM_027271               | chr3       | 41546313  | 41546892  | 64                   |
| Unc5b         | NM_029770               | chr10      | 60294104  | 60294424  | 64                   |
| Stat6         | NM_009284               | chr10      | 127079969 | 127080241 | 64                   |
| Polr3h        | NM_030229               | chr15      | 81756451  | 81756705  | 64                   |
| Kdm4c         | NM_144787               | chr4       | 73897649  | 73898043  | 64                   |
| Ak2           | NM_016895               | chr4       | 128670187 | 128670875 | 64                   |
| Spg21         | NM_138584               | chr9       | 65308667  | 65308947  | 64                   |
| Ctnna3        | NM_177612               | chr10      | 62892773  | 62893046  | 65                   |
| Asb3          | NM_023906               | chr11      | 30854271  | 30854652  | 65                   |
| Ppp6r3        | NM_001164159            | chr19      | 3575391   | 3575976   | 65                   |
| Pcif1         | NM_146129               | chr2       | 164704748 | 164705115 | 65                   |
| Vwa1          | NM_147776               | chr4       | 155148434 | 155148775 | 65                   |
| Rplp0         | NM_007475               | chr5       | 116009346 | 116009733 | 65                   |
| Arl2bp        | NM_024191               | chr8       | 97190386  | 97190741  | 65                   |
| 1600002H07Rik | NM_028056               | chr17      | 24357365  | 24357931  | 65                   |
| Fam83d        | NM_027975               | chr2       | 158593762 | 158594036 | 65                   |
| Gnb1l         | NM_001081682            | chr16      | 18498681  | 18499060  | 66                   |
| Lsm10         | NM_138721               | chr4       | 125773733 | 125774190 | 66                   |
| Cbfb          | NM_001161458            | chr8       | 107694454 | 107694823 | 66                   |
| Elmsan1       | NM_001163502            | chr12      | 85534736  | 85535060  | 66                   |
| Gm12942       | NM_001099319            | chr4       | 126803205 | 126803500 | 67                   |
| Zfp574        | NM_175477               | chr7       | 25862097  | 25862565  | 67                   |
| Med26         | NM_027485               | chr8       | 75071916  | 75072366  | 67                   |
| Pole          | NM_011132               | chr5       | 110715096 | 110715713 | 68                   |
| Ccdc124       | NM_026964               | chr8       | 73397015  | 73397626  | 68                   |
| Agpat6        | NM_018743               | chr8       | 24318744  | 24318968  | 68                   |
| Trip4         | NM_001170907            | chr9       | 65732734  | 65733088  | 68                   |
| Eaf1          | NM_028932               | chr14      | 32308164  | 32308501  | 69                   |
| Fbln1         | NM_010180               | chr15      | 85036315  | 85036696  | 69                   |

**Supplemental Table 4. Significant ChIP-seq E2F3B promoter peaks (+/- 2kb from the TSS)**

| Gene Symbol | Refseq Transcript ID | Chromosome | Start     | End       | distance from TSS |
|-------------|----------------------|------------|-----------|-----------|-------------------|
| Chp1        | NM_019769            | chr2       | 119373316 | 119373705 | 69                |
| Eefsec      | NM_023060            | chr6       | 88396139  | 88396788  | 69                |
| Rtcb        | NM_145422            | chr10      | 85420290  | 85420646  | 69                |
| Urgcp       | NM_178623            | chr11      | 5640934   | 5641284   | 69                |
| Hdac2       | NM_008229            | chr10      | 36694238  | 36694599  | 70                |
| Ndufaf5     | NM_027093            | chr2       | 139996222 | 139996679 | 70                |
| Eef2        | NM_007907            | chr10      | 80639199  | 80639691  | 70                |
| Spag7       | NM_172561            | chr11      | 70482733  | 70482961  | 70                |
| Rmi1        | NM_028904            | chr13      | 58503683  | 58504371  | 70                |
| Tonsl       | NM_183091            | chr15      | 76470011  | 76470565  | 70                |
| Pknox1      | NM_016670            | chr17      | 31701614  | 31701961  | 71                |
| Slc29a2     | NM_007854            | chr19      | 5023970   | 5024181   | 71                |
| Snx5        | NM_001199188         | chr2       | 144096281 | 144096852 | 71                |
| Enkd1       | NM_198299            | chr8       | 108231794 | 108232199 | 71                |
| Nedd4       | NM_010890            | chr9       | 72509998  | 72510449  | 71                |
| Mtag2       | NR_027802            | chr7       | 52622472  | 52622874  | 71                |
| Ppcdc       | NM_176831            | chr9       | 57287700  | 57287998  | 71                |
| Ska1        | NM_001164355         | chr18      | 74367295  | 74367504  | 72                |
| Gm5617      | NM_001004191         | chr9       | 48303269  | 48303768  | 72                |
| Mrpl42      | NM_026065            | chr10      | 94964245  | 94964731  | 72                |
| Brca1       | NM_009764            | chr11      | 101413061 | 101413331 | 72                |
| Khynyn      | NM_027143            | chr14      | 56503701  | 56504053  | 72                |
| Gins1       | NM_027014            | chr2       | 150735174 | 150735628 | 72                |
| Myc         | NM_001177353         | chr15      | 61816774  | 61817161  | 73                |
| Tbcc        | NM_178385            | chr17      | 47027431  | 47027852  | 73                |
| Apip        | NM_019735            | chr2       | 102913546 | 102914261 | 73                |
| Thrap3      | NM_146153            | chr4       | 125879453 | 125880308 | 73                |
| Pdp2        | NM_001024606         | chr8       | 107115139 | 107115740 | 73                |
| Dars2       | NM_172644            | chr1       | 163000520 | 163000858 | 73                |
| Galc        | NM_008079            | chr12      | 99497314  | 99497632  | 73                |
| Tcof1       | NM_011552            | chr18      | 61008340  | 61008748  | 73                |
| Mastl       | NM_025979            | chr2       | 23011263  | 23011677  | 73                |
| Col4a1      | NM_009931            | chr8       | 11312497  | 11313007  | 73                |
| H2afy       | NM_001159515         | chr13      | 56236673  | 56237000  | 74                |
| Gm5464      | NM_001034881         | chr14      | 67487401  | 67488118  | 74                |
| Scarb1      | NM_001205082         | chr5       | 125821185 | 125821594 | 74                |
| Xrcc1       | NM_009532            | chr7       | 25331977  | 25332506  | 74                |
| Tnpol       | NM_178716            | chr13      | 99696096  | 99696432  | 74                |
| Skp2        | NM_013787            | chr15      | 9069798   | 9070472   | 74                |
| Gm1673      | NM_001033458         | chr5       | 34326025  | 34326367  | 74                |
| Ruvbl2      | NM_011304            | chr7       | 52689457  | 52690061  | 74                |
| Rad51b      | NM_001252562         | chr12      | 80398221  | 80398602  | 75                |
| Ighmbp2     | NM_009212            | chr19      | 3282792   | 3283077   | 75                |
| Dstn        | NM_019771            | chr2       | 143740958 | 143741324 | 75                |
| Ift74       | NM_026319            | chr4       | 94281101  | 94281411  | 75                |
| Pbdc1       | NM_001281871         | chrX       | 102274847 | 102275491 | 75                |
| Mmaa        | NM_133823            | chr8       | 81818309  | 81819248  | 76                |
| Ddx19a      | NM_007916            | chr8       | 113521436 | 113521857 | 76                |

**Supplemental Table 4. Significant ChIP-seq E2F3B promoter peaks  
(+/- 2kb from the TSS)**

| Gene Symbol   | Refseq<br>Transcript ID | Chromosome | Start     | End       | distance<br>from TSS |
|---------------|-------------------------|------------|-----------|-----------|----------------------|
| Net1          | NM_019671               | chr13      | 3917156   | 3917622   | 76                   |
| Nudc          | NM_010948               | chr4       | 133101551 | 133102179 | 76                   |
| Paics         | NM_025939               | chr5       | 77380068  | 77380954  | 76                   |
| 2810417H13Rik | NM_026515               | chr9       | 65737971  | 65738439  | 76                   |
| Rnaseh2b      | NM_026001               | chr14      | 62950686  | 62951349  | 77                   |
| Zfp213        | NM_001033496            | chr17      | 23700973  | 23701258  | 77                   |
| Vdac1         | NM_011694               | chr11      | 52174576  | 52174811  | 78                   |
| Pcyox1l       | NM_172832               | chr18      | 61867038  | 61867383  | 78                   |
| Pcnxl3        | NM_144868               | chr19      | 5688476   | 5689183   | 78                   |
| Anxa11        | NM_013469               | chr14      | 26661573  | 26661863  | 78                   |
| Dpm3          | NM_026767               | chr3       | 89070259  | 89070661  | 78                   |
| Msl2          | NM_001100451            | chr9       | 100978379 | 100978747 | 78                   |
| Myg1          | NM_021713               | chr15      | 102161914 | 102162522 | 79                   |
| Capza1        | NM_009797               | chr3       | 104667145 | 104667541 | 79                   |
| Cdc25a        | NM_007658               | chr9       | 109777709 | 109778613 | 79                   |
| Agps          | NM_172666               | chr2       | 75670126  | 75670499  | 80                   |
| Melk          | NM_010790               | chr4       | 44313648  | 44314087  | 80                   |
| Tmem80        | NM_001141950            | chr7       | 148513979 | 148514237 | 80                   |
| Cotl1         | NM_028071               | chr8       | 122364199 | 122364597 | 80                   |
| Msra          | NM_001253715            | chr14      | 65059639  | 65059924  | 81                   |
| Cdc7          | NM_001271568            | chr5       | 107393179 | 107393662 | 81                   |
| Ptbp1         | NM_008956               | chr10      | 79316918  | 79317596  | 81                   |
| Rprd2         | NM_001081293            | chr3       | 95622602  | 95622986  | 81                   |
| Gtf2e2        | NM_026584               | chr8       | 34842404  | 34842834  | 81                   |
| Dlgap5        | NM_144553               | chr14      | 48037716  | 48038282  | 82                   |
| Kat5          | NM_001199247            | chr19      | 5609834   | 5610188   | 82                   |
| Pdk1          | NM_172665               | chr2       | 71711020  | 71711704  | 82                   |
| Rab11a        | NM_017382               | chr9       | 64585328  | 64585632  | 82                   |
| Foxo3         | NM_019740               | chr10      | 41996315  | 41996614  | 83                   |
| Odf2l         | NM_025714               | chr3       | 144781345 | 144781946 | 83                   |
| E130307A14Rik | NR_038037               | chr10      | 39451485  | 39451973  | 83                   |
| Cenph         | NM_021886               | chr13      | 101545616 | 101545924 | 83                   |
| Rpl10a        | NM_011287               | chr17      | 28465279  | 28465717  | 83                   |
| Tmem209       | NM_178625               | chr6       | 30459357  | 30459887  | 83                   |
| Psmc3ip       | NM_008949               | chr11      | 100956527 | 100956802 | 84                   |
| 5430416N02Rik | NR_034038               | chr5       | 100858142 | 100858797 | 84                   |
| Cmc1          | NM_026442               | chr9       | 118059052 | 118059407 | 84                   |
| 1700056E22Rik | NM_028516               | chr1       | 185857695 | 185857889 | 84                   |
| Lcmt2         | NM_177846               | chr2       | 120966026 | 120966672 | 84                   |
| Mccc1         | NM_023644               | chr3       | 35899343  | 35899686  | 85                   |
| Atg5          | NM_053069               | chr10      | 43988111  | 43988385  | 85                   |
| Rmi2          | NM_001162932            | chr16      | 10835010  | 10835462  | 85                   |
| Morf4l1       | NM_001039147            | chr9       | 90009468  | 90009676  | 85                   |
| Wdfy1         | NM_001111279            | chr1       | 79758113  | 79758401  | 86                   |
| 4930467K11Rik | NR_045353               | chr10      | 57205876  | 57206268  | 86                   |
| Nsmce2        | NM_026746               | chr15      | 59205568  | 59206108  | 86                   |
| Prkag1        | NM_016781               | chr15      | 98661623  | 98662081  | 86                   |
| Rabepk        | NM_145522               | chr2       | 34655134  | 34655556  | 86                   |

**Supplemental Table 4. Significant ChIP-seq E2F3B promoter peaks  
(+/- 2kb from the TSS)**

| Gene Symbol   | Refseq<br>Transcript ID | Chromosome | Start     | End       | distance<br>from TSS |
|---------------|-------------------------|------------|-----------|-----------|----------------------|
| Rbm15         | NM_001045807            | chr3       | 107135936 | 107136304 | 86                   |
| Cyld          | NM_001276279            | chr8       | 91220815  | 91221209  | 86                   |
| Pola2         | NM_008893               | chr19      | 5963877   | 5964360   | 87                   |
| Eef1a1        | NM_010106               | chr9       | 78329279  | 78329608  | 87                   |
| Sgol2         | NM_199007               | chr1       | 58052701  | 58053107  | 87                   |
| Slc38a10      | NM_001164800            | chr11      | 120012412 | 120012742 | 87                   |
| Cbx5          | NM_001076789            | chr15      | 103069578 | 103070740 | 87                   |
| Etohd2        | NR_015349               | chr13      | 59871241  | 59871586  | 88                   |
| Rnf219        | NM_026047               | chr14      | 104921553 | 104922036 | 88                   |
| Pfdn5         | NM_027044               | chr15      | 102156439 | 102156828 | 88                   |
| Man1a2        | NM_010763               | chr3       | 100489177 | 100489438 | 88                   |
| Rmrp          | NR_001460               | chr4       | 43505588  | 43506096  | 88                   |
| Lyplal1       | NM_146106               | chr1       | 187940924 | 187941275 | 89                   |
| Nxt1          | NM_001110159            | chr2       | 148498213 | 148498716 | 89                   |
| Zcchc6        | NM_153538               | chr13      | 59924225  | 59924611  | 89                   |
| Ncaph2        | NM_001271600            | chr15      | 89186073  | 89186403  | 89                   |
| Anapc15       | NM_001291348            | chr7       | 109044511 | 109045355 | 89                   |
| Ckap2         | NM_001004140            | chr8       | 23295984  | 23296418  | 89                   |
| Gnpat         | NM_010322               | chr8       | 127386783 | 127387259 | 89                   |
| Cpm           | NM_027468               | chr10      | 117066451 | 117066838 | 90                   |
| Lars          | NM_134137               | chr18      | 42421485  | 42421784  | 90                   |
| Vps16         | NM_030559               | chr2       | 130249944 | 130250345 | 90                   |
| Kxd1          | NM_029366               | chr8       | 73046642  | 73047334  | 90                   |
| Pir           | NM_027153               | chrX       | 160707322 | 160707582 | 90                   |
| Tusc3         | NM_030254               | chr8       | 40068803  | 40069218  | 91                   |
| Tmem11        | NM_001168507            | chr11      | 60692214  | 60692682  | 91                   |
| Pole2         | NM_011133               | chr12      | 70328866  | 70329304  | 91                   |
| Cdkn2aipnl    | NM_029976               | chr11      | 51781043  | 51781404  | 92                   |
| Gnl3          | NM_153547               | chr14      | 31832023  | 31832426  | 92                   |
| Clhc1         | NM_001081099            | chr4       | 134066811 | 134067198 | 92                   |
| Tmed3         | NM_025360               | chr9       | 89599557  | 89600020  | 92                   |
| Gyk           | NM_212444               | chrX       | 83021857  | 83022274  | 92                   |
| 4833418N02Rik | NR_015506               | chr17      | 87681862  | 87682260  | 92                   |
| Vdac3         | NM_011696               | chr8       | 23703959  | 23704425  | 92                   |
| Raver1        | NM_027911               | chr9       | 20896043  | 20896635  | 92                   |
| Sin3a         | NM_001110350            | chr9       | 56924094  | 56924454  | 92                   |
| Pex2          | NM_001163305            | chr3       | 5575864   | 5576445   | 93                   |
| Minpp1        | NM_010799               | chr19      | 32560268  | 32560434  | 93                   |
| Mtx2          | NM_016804               | chr2       | 74663757  | 74664165  | 93                   |
| Abhd13        | NM_026868               | chr8       | 9977643   | 9977975   | 93                   |
| Recql4        | NM_058214               | chr15      | 76540594  | 76541195  | 94                   |
| Smc5          | NM_001252684            | chr19      | 23348086  | 23348499  | 94                   |
| Rasl11a       | NM_026864               | chr5       | 147656523 | 147656956 | 94                   |
| Rbm4b         | NM_025717               | chr19      | 4756397   | 4756839   | 94                   |
| U2surp        | NM_026476               | chr9       | 95412035  | 95412605  | 94                   |
| Socs3         | NM_007707               | chr11      | 117830386 | 117830782 | 95                   |
| Tm9sf1        | NM_028780               | chr14      | 56262280  | 56262814  | 95                   |
| Kmt2c         | NM_001081383            | chr5       | 25004397  | 25004612  | 96                   |

**Supplemental Table 4. Significant ChIP-seq E2F3B promoter peaks  
(+/- 2kb from the TSS)**

| Gene Symbol   | Refseq<br>Transcript ID | Chromosome | Start     | End       | distance<br>from TSS |
|---------------|-------------------------|------------|-----------|-----------|----------------------|
| Zfp507        | NM_177739               | chr7       | 36587729  | 36588094  | 96                   |
| Pagr1a        | NM_030240               | chr7       | 134160573 | 134160966 | 96                   |
| C130036L24Rik | NR_015507               | chr1       | 88255988  | 88256500  | 96                   |
| Rtel1         | NM_001166665            | chr2       | 181054359 | 181054689 | 96                   |
| Arfrp1        | NM_001165995            | chr2       | 181099809 | 181100215 | 96                   |
| Slc2a1        | NM_011400               | chr4       | 118781279 | 118781611 | 96                   |
| Fam212a       | NM_026597               | chr9       | 107887959 | 107888341 | 96                   |
| Cnih1         | NM_009919               | chr14      | 47407724  | 47408145  | 97                   |
| Cdipt         | NM_026638               | chr7       | 134119360 | 134119687 | 97                   |
| Sdha          | NM_023281               | chr13      | 74487404  | 74487776  | 97                   |
| Elmod2        | NM_178736               | chr8       | 85855934  | 85856640  | 97                   |
| Asf1a         | NM_025541               | chr10      | 53316692  | 53317035  | 98                   |
| Tmod3         | NM_016963               | chr9       | 75407146  | 75407584  | 98                   |
| 2410002F23Rik | NM_025880               | chr7       | 51502056  | 51502323  | 99                   |
| 4930405A21Rik | NR_040505               | chr2       | 156546415 | 156546675 | 99                   |
| Dars          | NM_177445               | chr1       | 130313694 | 130314091 | 100                  |
| Katnbl1       | NM_024254               | chr2       | 112219267 | 112219666 | 100                  |
| Zdhhc1        | NM_175160               | chr8       | 108020437 | 108020902 | 100                  |
| Smc1a         | NM_019710               | chrX       | 148450782 | 148451357 | 100                  |
| BC004004      | NM_030561               | chr17      | 29405663  | 29406001  | 100                  |
| Spty2d1       | NM_175318               | chr7       | 54263551  | 54263814  | 101                  |
| Tex264        | NM_011573               | chr9       | 106587889 | 106588202 | 101                  |
| Arl6ip6       | NM_022989               | chr2       | 53050950  | 53051486  | 101                  |
| Haus8         | NM_029621               | chr8       | 73796075  | 73796699  | 101                  |
| B930003M22Rik | NR_037588               | chr17      | 10512633  | 10513137  | 102                  |
| Gm10941       | NR_026944               | chr10      | 76721693  | 76722036  | 103                  |
| Txnrd1        | NM_001042514            | chr10      | 82322991  | 82323384  | 103                  |
| Chrac1        | NM_053068               | chr15      | 72920621  | 72921266  | 103                  |
| Dut           | NM_023595               | chr2       | 125072954 | 125073752 | 103                  |
| Ddi2          | NM_001017966            | chr4       | 141278955 | 141279505 | 103                  |
| Orc5          | NM_011959               | chr5       | 22055869  | 22056221  | 103                  |
| Scaf11        | NM_028148               | chr15      | 96291000  | 96291339  | 104                  |
| Hn1l          | NM_198937               | chr17      | 25097172  | 25097755  | 104                  |
| Pim3          | NM_145478               | chr15      | 88692446  | 88693008  | 104                  |
| Gne           | NM_001190414            | chr4       | 44085215  | 44085665  | 104                  |
| Vps37b        | NM_177876               | chr5       | 124481905 | 124482423 | 104                  |
| Primpol       | NM_001001184            | chr8       | 47702211  | 47702687  | 104                  |
| Bend6         | NM_177235               | chr1       | 33964181  | 33964540  | 105                  |
| Zfp524        | NM_025324               | chr7       | 4967014   | 4967413   | 105                  |
| Zfp354a       | NM_009329               | chr11      | 50872712  | 50873014  | 105                  |
| Rcn1          | NM_009037               | chr2       | 105239265 | 105239475 | 105                  |
| Rpl31         | NM_001252219            | chr1       | 39424651  | 39424951  | 106                  |
| Dtymk         | NM_001105667            | chr1       | 95698127  | 95698681  | 106                  |
| Tgs1          | NM_054089               | chr4       | 3501971   | 3502291   | 106                  |
| Ddx39b        | NM_019693               | chr17      | 35378568  | 35379025  | 107                  |
| Rmdn3         | NM_001033136            | chr2       | 118982380 | 118982945 | 107                  |
| Sord          | NM_146126               | chr2       | 122060511 | 122060851 | 107                  |
| Dlc1          | NM_001194941            | chr8       | 37795852  | 37796148  | 107                  |

**Supplemental Table 4. Significant ChIP-seq E2F3B promoter peaks (+/- 2kb from the TSS)**

| Gene Symbol | Refseq Transcript ID | Chromosome | Start     | End       | distance from TSS |
|-------------|----------------------|------------|-----------|-----------|-------------------|
| Panx1       | NM_019482            | chr9       | 14849632  | 14849996  | 107               |
| Tmem14c     | NM_025387            | chr13      | 41111574  | 41111878  | 108               |
| Gm5475      | NR_040351            | chr15      | 100253576 | 100253886 | 108               |
| Dtl         | NM_029766            | chr1       | 193398867 | 193399740 | 109               |
| Mettl1      | NM_010792            | chr10      | 126478872 | 126479319 | 109               |
| Spice1      | NM_144550            | chr16      | 44347273  | 44347970  | 109               |
| Elmo1       | NM_080288            | chr13      | 20182330  | 20182638  | 109               |
| Dap3        | NM_001164533         | chr3       | 88753875  | 88754313  | 109               |
| Mars        | NM_001171582         | chr10      | 126748566 | 126748897 | 110               |
| Tfeb        | NM_001161722         | chr17      | 47873928  | 47874261  | 110               |
| Dis3l2      | NM_153530            | chr1       | 88600190  | 88600786  | 110               |
| Bag5        | NM_027404            | chr12      | 112951202 | 112951510 | 110               |
| Tgfbr2      | NM_029575            | chr9       | 116084057 | 116084683 | 110               |
| Tex30       | NM_029368            | chr1       | 44158942  | 44159301  | 111               |
| Fam172a     | NM_138312            | chr13      | 77847847  | 77848274  | 111               |
| Ppfibp1     | NM_026221            | chr6       | 146836932 | 146837319 | 111               |
| Tnp2        | NM_001122843         | chr8       | 87560986  | 87561367  | 111               |
| Ccne2       | NM_009830            | chr4       | 11118842  | 11119090  | 111               |
| Rragc       | NM_017475            | chr4       | 123594542 | 123595030 | 111               |
| Tsen15      | NM_025677            | chr1       | 154233494 | 154233905 | 112               |
| Nmral1      | NM_001290761         | chr16      | 4718994   | 4719493   | 112               |
| Wdr76       | NM_001290986         | chr2       | 121332324 | 121332815 | 112               |
| Cox7a2      | NM_009945            | chr9       | 79607361  | 79607734  | 112               |
| Rbm3        | NM_016809            | chrX       | 7722728   | 7723059   | 112               |
| Daxx        | NM_001199733         | chr17      | 34046387  | 34046928  | 113               |
| Gm3230      | NR_033642            | chr2       | 19579178  | 19579643  | 113               |
| Aarsd1      | NM_144829            | chr11      | 101278415 | 101278851 | 113               |
| Dek         | NM_025900            | chr13      | 47201067  | 47201882  | 114               |
| Atpaf1      | NM_181040            | chr4       | 115457327 | 115457738 | 115               |
| Slbp        | NM_001289724         | chr5       | 33994698  | 33995517  | 115               |
| Wdr47       | NM_181400            | chr3       | 108394122 | 108394498 | 115               |
| Fus         | NM_139149            | chr7       | 135110886 | 135111329 | 116               |
| Rbmxl1      | NM_009033            | chr8       | 81032465  | 81032956  | 116               |
| Triobp      | NM_001039156         | chr15      | 78778026  | 78778514  | 117               |
| Zbtb5       | NM_173399            | chr4       | 45025019  | 45025313  | 117               |
| Zwint       | NM_001293683         | chr10      | 72117498  | 72117923  | 118               |
| Gspt1       | NM_001130008         | chr16      | 11253911  | 11254687  | 118               |
| Ssrp1       | NM_182990            | chr2       | 84877146  | 84877642  | 118               |
| Ipp         | NM_008389            | chr4       | 116180103 | 116180440 | 119               |
| Zfp398      | NM_027477            | chr6       | 47785543  | 47786012  | 119               |
| Exo1        | NM_012012            | chr1       | 177810821 | 177811233 | 119               |
| Frmd4a      | NM_001177844         | chr2       | 4480809   | 4481027   | 119               |
| Lrrfip1     | NM_008515            | chr1       | 92949920  | 92950359  | 120               |
| Rrp1        | NM_010925            | chr10      | 77875511  | 77875824  | 120               |
| Cgnl1       | NM_026599            | chr9       | 71619052  | 71619524  | 120               |
| Rpl22       | NM_001277114         | chr4       | 151699694 | 151700216 | 121               |
| Raf1        | NM_029780            | chr6       | 115626351 | 115626709 | 122               |
| Afg3l1      | NM_054070            | chr8       | 126001685 | 126002081 | 122               |

**Supplemental Table 4. Significant ChIP-seq E2F3B promoter peaks  
(+/- 2kb from the TSS)**

| Gene Symbol | Refseq<br>Transcript ID | Chromosome | Start     | End       | distance<br>from TSS |
|-------------|-------------------------|------------|-----------|-----------|----------------------|
| Lims1       | NM_026148               | chr10      | 57786116  | 57786555  | 123                  |
| Nup188      | NM_198304               | chr2       | 30141831  | 30142318  | 123                  |
| Slc3a2      | NM_001161413            | chr19      | 8797463   | 8798007   | 123                  |
| Irs2        | NM_001081212            | chr8       | 11008108  | 11008503  | 124                  |
| Timm13      | NM_013895               | chr10      | 80363208  | 80363970  | 124                  |
| Cul7        | NM_025611               | chr17      | 46787266  | 46787554  | 124                  |
| Dctn4       | NM_026302               | chr18      | 60685776  | 60686220  | 124                  |
| Umps        | NM_009471               | chr16      | 33966715  | 33967212  | 125                  |
| Lsm2        | NM_001110101            | chr17      | 35118686  | 35119159  | 125                  |
| Ccdc85b     | NM_198616               | chr19      | 5457287   | 5457588   | 125                  |
| Gmfb        | NM_022023               | chr14      | 47441611  | 47441971  | 125                  |
| Zfp869      | NM_001039965            | chr8       | 72240265  | 72241085  | 125                  |
| Impa2       | NM_053261               | chr18      | 67448785  | 67449218  | 126                  |
| Fads1       | NM_146094               | chr19      | 10257290  | 10257716  | 126                  |
| Tnfrsf12a   | NM_013749               | chr17      | 23814012  | 23814565  | 127                  |
| Setx        | NM_198033               | chr2       | 28980413  | 28980862  | 127                  |
| F3          | NM_010171               | chr3       | 121426425 | 121426736 | 127                  |
| Rad21       | NM_009009               | chr15      | 51822977  | 51823379  | 127                  |
| Ets2        | NM_011809               | chr16      | 95923904  | 95924377  | 128                  |
| Rab1b       | NM_029576               | chr19      | 5106717   | 5107018   | 128                  |
| Rabep2      | NM_030566               | chr7       | 133572174 | 133572643 | 129                  |
| Sass6       | NM_028349               | chr3       | 116297740 | 116298268 | 129                  |
| Ano8        | NM_001164679            | chr8       | 74009614  | 74010058  | 129                  |
| Dhps        | NM_001039514            | chr8       | 87595386  | 87596182  | 129                  |
| Fam178a     | NM_001081225            | chr19      | 45005314  | 45006161  | 130                  |
| Mrp14       | NM_023167               | chr9       | 20807128  | 20807491  | 130                  |
| Rsb1        | NM_172684               | chr3       | 103718058 | 103718286 | 130                  |
| Mir1938     | NR_035459               | chr12      | 40949036  | 40949497  | 131                  |
| Bid         | NM_007544               | chr6       | 120866530 | 120866883 | 131                  |
| Zfp644      | NM_026856               | chr5       | 107125417 | 107126017 | 131                  |
| Snrpe       | NM_009227               | chr1       | 135506397 | 135507051 | 132                  |
| Tmx4        | NM_029148               | chr2       | 134469439 | 134470009 | 132                  |
| Arnt        | NM_009709               | chr3       | 95238225  | 95238661  | 132                  |
| Anapc5      | NM_001042491            | chr5       | 123270790 | 123271646 | 132                  |
| Crem        | NM_001110851            | chr18      | 3337309   | 3337598   | 133                  |
| Ctc1        | NM_001143790            | chr11      | 68829390  | 68829700  | 133                  |
| Immt        | NM_001253689            | chr6       | 71781112  | 71781780  | 133                  |
| Alx1        | NM_172553               | chr10      | 102491072 | 102491477 | 136                  |
| Tax1bp3     | NM_029564               | chr11      | 72990547  | 72990892  | 136                  |
| Bub1        | NM_009772               | chr2       | 127657219 | 127657698 | 136                  |
| Noxo1       | NM_027988               | chr17      | 24833198  | 24833430  | 136                  |
| Tardbp      | NM_001008546            | chr4       | 148000662 | 148001274 | 136                  |
| Tpst1       | NM_001130476            | chr5       | 130554998 | 130555753 | 137                  |
| Zfx         | NM_011768               | chrX       | 91368462  | 91368753  | 138                  |
| Specc1      | NM_001281818            | chr11      | 61770217  | 61770590  | 140                  |
| Zfp521      | NM_145492               | chr18      | 14130895  | 14131308  | 140                  |
| Rnf4        | NM_011278               | chr5       | 34678760  | 34679598  | 141                  |
| Fancc       | NM_001042673            | chr13      | 63532715  | 63533106  | 142                  |



**Supplemental Table 4. Significant ChIP-seq E2F3B promoter peaks  
(+/- 2kb from the TSS)**

| Gene Symbol | Refseq<br>Transcript ID | Chromosome | Start     | End       | distance<br>from TSS |
|-------------|-------------------------|------------|-----------|-----------|----------------------|
| Prkab2      | NM_182997               | chr3       | 97462096  | 97462455  | 142                  |
| Wrnip1      | NM_030215               | chr13      | 32893783  | 32894299  | 143                  |
| Mark2       | NM_001080389            | chr19      | 7416030   | 7416382   | 143                  |
| Zfp748      | NM_001035231            | chr13      | 67653687  | 67654200  | 144                  |
| Chek1       | NM_007691               | chr9       | 36533867  | 36534330  | 144                  |
| Bcl7a       | NM_029850               | chr5       | 123794392 | 123794810 | 145                  |
| Lsm4        | NM_015816               | chr8       | 73196932  | 73197617  | 146                  |
| Ewsr1       | NM_007968               | chr11      | 4998736   | 4999151   | 147                  |
| H1f0        | NM_008197               | chr15      | 78858502  | 78859073  | 147                  |
| Siah2       | NM_009174               | chr3       | 58495952  | 58496371  | 148                  |
| Chd3os      | NR_027827               | chr11      | 69154243  | 69154593  | 148                  |
| Ubxn8       | NM_178648               | chr8       | 34752075  | 34752522  | 149                  |
| Lyst        | NM_010748               | chr13      | 13682730  | 13682919  | 150                  |
| Pak1ip1     | NM_026550               | chr13      | 41096349  | 41096706  | 150                  |
| Pdlim1      | NM_016861               | chr19      | 40345790  | 40346121  | 150                  |
| NoI7        | NM_023554               | chr13      | 43493603  | 43494185  | 150                  |
| Oard1       | NM_207219               | chr17      | 48548852  | 48550096  | 150                  |
| Yars        | NM_134151               | chr4       | 128866890 | 128867487 | 151                  |
| Cipc        | NM_001289430            | chr12      | 88287888  | 88288395  | 152                  |
| Mtbp        | NM_134092               | chr15      | 55388791  | 55389439  | 153                  |
| Poldip3     | NM_178627               | chr15      | 82979360  | 82979864  | 153                  |
| Senp1       | NM_144851               | chr15      | 97923589  | 97924103  | 153                  |
| Ndufa11     | NM_027244               | chr17      | 56857133  | 56857543  | 154                  |
| Prr5l       | NM_001083810            | chr2       | 101637502 | 101637916 | 154                  |
| Dhodh       | NM_020046               | chr8       | 112132137 | 112132699 | 154                  |
| Slc25a25    | NM_146118               | chr2       | 32306653  | 32307011  | 157                  |
| Gpd1l       | NM_175380               | chr9       | 114842695 | 114843196 | 159                  |
| Gtf2ird2    | NM_053266               | chr5       | 134659698 | 134660436 | 160                  |
| Sae1        | NM_001285892            | chr7       | 16972827  | 16973340  | 161                  |
| Gsr         | NM_010344               | chr8       | 34763697  | 34764043  | 161                  |
| Xylb        | NM_001033209            | chr9       | 119266466 | 119266852 | 161                  |
| Dlx1        | NM_010053               | chr2       | 71367543  | 71367782  | 162                  |
| Bcas2       | NM_026602               | chr3       | 102975589 | 102976000 | 162                  |
| Galnt9      | NM_198306               | chr5       | 110973382 | 110973688 | 162                  |
| Wdr4        | NM_021322               | chr17      | 31648977  | 31649560  | 163                  |
| Phlda1      | NM_009344               | chr10      | 110943241 | 110943767 | 163                  |
| Actb        | NM_007393               | chr5       | 143668017 | 143668461 | 163                  |
| Zc3h7b      | NM_001081016            | chr15      | 81575281  | 81575600  | 164                  |
| Rnf168      | NM_027355               | chr16      | 32277373  | 32278047  | 164                  |
| Evc         | NM_021292               | chr5       | 37727759  | 37728151  | 164                  |
| Zbtb45      | NM_001024699            | chr7       | 13594852  | 13595116  | 164                  |
| Pkd1        | NM_013630               | chr17      | 24686848  | 24687271  | 166                  |
| Trim39      | NM_178281               | chr17      | 36407834  | 36408589  | 166                  |
| Erlin1      | NM_145502               | chr19      | 44143867  | 44144152  | 166                  |
| Ankrd42     | NM_028665               | chr7       | 99785323  | 99785648  | 166                  |
| Ilkap       | NM_023343               | chr1       | 93295013  | 93295373  | 166                  |
| Slc22a15    | NM_001039371            | chr3       | 101727970 | 101728447 | 167                  |
| Zfp948      | NM_001002008            | chr17      | 21704021  | 21704331  | 167                  |

**Supplemental Table 4. Significant ChIP-seq E2F3B promoter peaks  
(+/- 2kb from the TSS)**

| Gene Symbol   | Refseq<br>Transcript ID | Chromosome | Start     | End       | distance<br>from TSS |
|---------------|-------------------------|------------|-----------|-----------|----------------------|
| Luzp1         | NM_024452               | chr4       | 136025596 | 136026088 | 167                  |
| Aco1          | NM_007386               | chr4       | 40090354  | 40090575  | 168                  |
| Hexb          | NM_010422               | chr13      | 97967913  | 97968372  | 169                  |
| Daglb         | NM_144915               | chr5       | 144225299 | 144225758 | 169                  |
| Timeless      | NM_001136082            | chr10      | 127669116 | 127669458 | 169                  |
| Cenpm         | NM_178269               | chr15      | 82074761  | 82075253  | 169                  |
| Ankrd46       | NM_175134               | chr15      | 36426008  | 36426743  | 170                  |
| Tnfaip8       | NM_134131               | chr18      | 50212966  | 50213243  | 170                  |
| Hnrnpdl       | NM_016690               | chr5       | 100467886 | 100468253 | 171                  |
| Cbx1          | NM_007622               | chr11      | 96650251  | 96650989  | 171                  |
| Kpna1         | NM_008465               | chr16      | 35983418  | 35983821  | 172                  |
| Cdk4          | NM_009870               | chr10      | 126500513 | 126501147 | 172                  |
| Rpl22l1       | NM_026517               | chr3       | 28704397  | 28704811  | 172                  |
| Suv39h1       | NM_011514               | chrX       | 7651508   | 7651918   | 172                  |
| Ddx11         | NM_001003919            | chr17      | 66472859  | 66473204  | 173                  |
| Uap1l1        | NM_001033293            | chr2       | 25220871  | 25221072  | 174                  |
| Pank2         | NM_153501               | chr2       | 131087988 | 131088830 | 174                  |
| Prex2         | NM_029525               | chr1       | 10983532  | 10983907  | 175                  |
| Zbtb44        | NM_172765               | chr9       | 30838173  | 30838632  | 175                  |
| Ube2i         | NM_001177609            | chr17      | 25410271  | 25411094  | 176                  |
| Neil3         | NM_146208               | chr8       | 54723986  | 54724499  | 176                  |
| Hint2         | NM_026871               | chr4       | 43668960  | 43669320  | 176                  |
| Ran           | NM_009391               | chr5       | 129525986 | 129526426 | 176                  |
| Atf7          | NM_146065               | chr15      | 102455300 | 102456049 | 177                  |
| Plekhg5       | NR_104381               | chr4       | 151460934 | 151461361 | 177                  |
| Srrt          | NM_031405               | chr5       | 137748463 | 137748986 | 177                  |
| Eri1          | NM_026067               | chr8       | 36558065  | 36558751  | 178                  |
| lqce          | NM_028833               | chr5       | 141177956 | 141178347 | 180                  |
| Tmem186       | NM_025708               | chr16      | 8637381   | 8637842   | 182                  |
| Invs          | NM_010569               | chr4       | 48292515  | 48293112  | 183                  |
| Lrrfip1       | NM_001111312            | chr1       | 92895336  | 92895636  | 183                  |
| Srebf2        | NM_033218               | chr15      | 81977680  | 81978082  | 183                  |
| Tbl1x         | NM_020601               | chrX       | 74756572  | 74756924  | 183                  |
| 4930529M08Rik | NM_175280               | chr2       | 145760531 | 145760875 | 184                  |
| Atp5g2        | NM_026468               | chr15      | 102500965 | 102501620 | 185                  |
| Mrpl23        | NM_011288               | chr7       | 149719087 | 149719324 | 185                  |
| Rqcd1         | NM_021383               | chr1       | 74552042  | 74553594  | 185                  |
| Pank4         | NM_172990               | chr4       | 154338262 | 154338591 | 186                  |
| LOC101056149  | NR_105041               | chr13      | 34744806  | 34745155  | 190                  |
| Eif4h         | NM_033561               | chr5       | 135114685 | 135115330 | 190                  |
| Rhbdd3        | NM_001290491            | chr11      | 4999194   | 4999736   | 190                  |
| Ppp1r15b      | NM_133819               | chr1       | 135027775 | 135028090 | 191                  |
| Wdyhv1        | NM_029734               | chr15      | 57973073  | 57973288  | 191                  |
| Mir1199       | NR_035431               | chr8       | 86535172  | 86535506  | 192                  |
| Pold3         | NM_133692               | chr7       | 107269491 | 107270142 | 193                  |
| Bak1          | NM_007523               | chr17      | 27165196  | 27165553  | 196                  |
| Kdelr3        | NM_134090               | chr15      | 79346891  | 79347176  | 197                  |
| Med18         | NM_026039               | chr4       | 132019311 | 132019966 | 197                  |

**Supplemental Table 4. Significant ChIP-seq E2F3B promoter peaks (+/- 2kb from the TSS)**

| Gene Symbol | Refseq Transcript ID | Chromosome | Start     | End       | distance from TSS |
|-------------|----------------------|------------|-----------|-----------|-------------------|
| Rpain       | NM_001252415         | chr11      | 70783715  | 70784081  | 197               |
| Poc1a       | NM_027354            | chr9       | 106183415 | 106183764 | 199               |
| Hat1        | NM_026115            | chr2       | 71227189  | 71227843  | 200               |
| Irak1bp1    | NM_001168240         | chr9       | 82723347  | 82723877  | 200               |
| Cdc5l       | NM_152810            | chr17      | 45570189  | 45570718  | 202               |
| Smarcad1    | NM_007958            | chr6       | 64992687  | 64993037  | 202               |
| Clspn       | NM_175554            | chr4       | 126234050 | 126234801 | 203               |
| Trim27      | NM_009054            | chr13      | 21271711  | 21272296  | 205               |
| Ccdc101     | NM_029339            | chr7       | 133792805 | 133793248 | 205               |
| Chmp6       | NM_001085498         | chr11      | 119775168 | 119775489 | 206               |
| Jkamp       | NM_024205            | chr12      | 73186891  | 73187170  | 206               |
| Yod1        | NM_178691            | chr1       | 132613895 | 132614323 | 206               |
| Vps52       | NM_172620            | chr17      | 34092897  | 34093168  | 207               |
| Sfmbt1      | NM_001166532         | chr14      | 31528771  | 31529247  | 209               |
| Slc44a2     | NM_001199186         | chr9       | 21125163  | 21125579  | 209               |
| Sept10      | NM_001024910         | chr10      | 58684085  | 58684684  | 210               |
| Fam84b      | NM_001162926         | chr15      | 60656187  | 60656662  | 210               |
| Ska2        | NM_025377            | chr11      | 86922858  | 86923086  | 210               |
| Scyl3       | NM_028776            | chr1       | 165860011 | 165860200 | 211               |
| Csf1        | NM_007778            | chr3       | 107562990 | 107563360 | 211               |
| Eif3d       | NM_018749            | chr15      | 77800823  | 77801260  | 212               |
| Exosc10     | NM_016699            | chr4       | 147932472 | 147933021 | 212               |
| Ercc6l2     | NM_023507            | chr13      | 63916669  | 63917039  | 213               |
| Fntb        | NM_145927            | chr12      | 77938457  | 77938876  | 214               |
| Cpox        | NM_007757            | chr16      | 58670321  | 58670749  | 215               |
| Dck         | NM_007832            | chr5       | 89193958  | 89194547  | 216               |
| Glit25d1    | NM_146211            | chr8       | 74134953  | 74135323  | 216               |
| Nup153      | NM_175749            | chr13      | 46822748  | 46823250  | 218               |
| Endod1      | NM_028013            | chr9       | 14185304  | 14185630  | 218               |
| Gnb5        | NM_138719            | chr9       | 75161909  | 75162276  | 219               |
| lars2       | NM_198653            | chr1       | 187152912 | 187153208 | 219               |
| Csrp2bp     | NM_181417            | chr2       | 144194846 | 144195133 | 220               |
| Retsat      | NM_026159            | chr6       | 72548665  | 72549016  | 220               |
| Pgap2       | NM_001291358         | chr7       | 109358914 | 109359222 | 220               |
| Dvl2        | NM_007888            | chr11      | 69814159  | 69814536  | 221               |
| Cep162      | NM_199316            | chr9       | 87149996  | 87150295  | 221               |
| Ccdc138     | NM_001162956         | chr10      | 57960744  | 57961066  | 221               |
| Zcchc3      | NM_175126            | chr2       | 152240274 | 152240839 | 223               |
| Gpbp1       | NM_001122963         | chr13      | 112279845 | 112280205 | 223               |
| Lrrc8a      | NM_177725            | chr2       | 30093347  | 30093676  | 224               |
| Mina        | NM_025910            | chr16      | 59471536  | 59472114  | 225               |
| Trim33      | NM_001079830         | chr3       | 103083277 | 103083605 | 226               |
| Pmf1        | NM_025928            | chr3       | 88213715  | 88214304  | 228               |
| Zfp184      | NM_183014            | chr13      | 22037039  | 22037341  | 228               |
| Ppia        | NM_008907            | chr11      | 6315974   | 6316228   | 229               |
| Cutc        | NM_001113562         | chr19      | 43827517  | 43827965  | 229               |
| Xntrpc      | NR_104582            | chr7       | 109213958 | 109214509 | 230               |
| Sumo3       | NM_019929            | chr10      | 77069002  | 77069416  | 231               |

**Supplemental Table 4. Significant ChIP-seq E2F3B promoter peaks (+/- 2kb from the TSS)**

| Gene Symbol   | Refseq Transcript ID | Chromosome | Start     | End       | distance from TSS |
|---------------|----------------------|------------|-----------|-----------|-------------------|
| Unk           | NM_172569            | chr11      | 115891592 | 115892131 | 233               |
| Rassf1        | NM_019713            | chr9       | 107456967 | 107457325 | 233               |
| Eif2s1        | NM_026114            | chr12      | 79963099  | 79963487  | 235               |
| Cdca2         | NM_001110162         | chr14      | 68333328  | 68333534  | 235               |
| Snrpa1        | NM_021336            | chr7       | 73205294  | 73205618  | 235               |
| Slc25a38      | NM_144793            | chr9       | 120019591 | 120019912 | 236               |
| Pcnt          | NM_008787            | chr10      | 75904987  | 75905852  | 237               |
| Cops5         | NM_013715            | chr1       | 10027800  | 10028201  | 239               |
| Pdss1         | NM_019501            | chr2       | 22751146  | 22751413  | 239               |
| Yeats4        | NM_026570            | chr10      | 116661061 | 116661585 | 239               |
| Arf2          | NM_007477            | chr11      | 103828255 | 103828595 | 241               |
| Dnajc10       | NM_024181            | chr2       | 80155727  | 80155999  | 241               |
| 4930509E16Rik | NR_045735            | chr9       | 72379296  | 72379548  | 242               |
| Cdca4         | NM_028023            | chr12      | 114067170 | 114067542 | 243               |
| Epdr1         | NM_134065            | chr13      | 19711323  | 19711585  | 244               |
| Papd4         | NM_133905            | chr13      | 93961672  | 93962314  | 244               |
| Akap8         | NM_019774            | chr17      | 32457578  | 32458125  | 246               |
| Sppl2a        | NM_023220            | chr2       | 126758594 | 126758854 | 246               |
| Gla1          | NM_020492            | chr11      | 55421324  | 55421579  | 248               |
| Mir7672       | NR_106132            | chr14      | 27488654  | 27489037  | 248               |
| Pycl          | NM_025412            | chr15      | 75751567  | 75751913  | 249               |
| Fam98b        | NM_026620            | chr2       | 117075611 | 117075835 | 249               |
| Nup54         | NM_183392            | chr5       | 92863649  | 92864301  | 249               |
| Rccd1         | NM_173445            | chr7       | 87468902  | 87469275  | 251               |
| Slc25a22      | NM_026646            | chr7       | 148623348 | 148623695 | 251               |
| Rrp1b         | NM_028244            | chr17      | 32173091  | 32173624  | 252               |
| Anapc13       | NM_181394            | chr9       | 102528504 | 102529249 | 252               |
| Gar1          | NM_026578            | chr3       | 129533847 | 129534275 | 252               |
| Fam92a        | NM_026558            | chr4       | 12098675  | 12099142  | 253               |
| Satb1         | NM_001163632         | chr17      | 51972234  | 51972485  | 255               |
| Gm17762       | NR_028378            | chr2       | 17948980  | 17949279  | 255               |
| Wbscr17       | NM_145218            | chr5       | 131782835 | 131783435 | 256               |
| Rhot2         | NM_145999            | chr17      | 25981410  | 25981665  | 258               |
| Clasp1        | NM_029709            | chr1       | 120285759 | 120286025 | 258               |
| Zfp598        | NM_183149            | chr17      | 24806796  | 24807113  | 259               |
| Myo9a         | NM_173018            | chr9       | 59599030  | 59599448  | 259               |
| Ccdc155       | NM_201374            | chr7       | 52459826  | 52460176  | 260               |
| Zc3hav1       | NM_028421            | chr6       | 38304114  | 38304566  | 262               |
| Hmgxb4        | NM_178017            | chr8       | 77517776  | 77517951  | 263               |
| Lmna          | NM_019390            | chr3       | 88296686  | 88297253  | 264               |
| H3f3b         | NM_008211            | chr11      | 115885416 | 115885688 | 265               |
| Rint1         | NM_177323            | chr5       | 23293712  | 23293940  | 265               |
| Zfp319        | NM_024467            | chr8       | 97855408  | 97855760  | 265               |
| Ttll9         | NM_001083618         | chr2       | 152788365 | 152788609 | 267               |
| Tmem74b       | NM_001160363         | chr2       | 151527830 | 151528192 | 268               |
| Fastk         | NM_023229            | chr5       | 23950619  | 23950949  | 268               |
| Gtf2a2        | NM_001039519         | chr9       | 69860331  | 69860914  | 269               |
| Eif6          | NM_010579            | chr2       | 155652274 | 155652508 | 269               |

**Supplemental Table 4. Significant ChIP-seq E2F3B promoter peaks  
(+/- 2kb from the TSS)**

| Gene Symbol   | Refseq<br>Transcript ID | Chromosome | Start     | End       | distance<br>from TSS |
|---------------|-------------------------|------------|-----------|-----------|----------------------|
| Tmem243       | NM_001081029            | chr5       | 9100849   | 9101167   | 272                  |
| Gm17296       | NM_001159907            | chr8       | 128998577 | 128998802 | 275                  |
| Naca          | NM_001282976            | chr10      | 127472447 | 127472906 | 276                  |
| Plekhj1       | NM_023900               | chr10      | 80260562  | 80261626  | 276                  |
| Gstt4         | NM_029472               | chr10      | 75284829  | 75285190  | 278                  |
| Srsf9         | NM_025573               | chr5       | 115777344 | 115777583 | 279                  |
| Txn1          | NM_011660               | chr4       | 57968729  | 57969272  | 282                  |
| Gmnn          | NM_020567               | chr13      | 24853147  | 24853898  | 283                  |
| Ptpn2         | NM_008977               | chr18      | 67883872  | 67884111  | 283                  |
| Orc6          | NM_019716               | chr8       | 87823642  | 87823984  | 283                  |
| Ccar2         | NM_146055               | chr14      | 70553133  | 70553493  | 284                  |
| Ss18l1        | NM_178750               | chr2       | 179777288 | 179777654 | 284                  |
| Ndc1          | NM_028355               | chr4       | 107040563 | 107040786 | 287                  |
| Atp1a1        | NM_144900               | chr3       | 101408182 | 101408500 | 288                  |
| Fam134a       | NM_170755               | chr1       | 75139414  | 75139884  | 290                  |
| Tpm2          | NM_001277875            | chr4       | 43535650  | 43536619  | 291                  |
| Fdxacb1       | NM_198675               | chr9       | 50576498  | 50576769  | 292                  |
| 2500004C02Rik | NR_040318               | chr2       | 153171043 | 153171458 | 295                  |
| Alkbh5        | NM_172943               | chr11      | 60351310  | 60351650  | 296                  |
| Serpinb6a     | NM_001243192            | chr13      | 34094208  | 34094524  | 296                  |
| Slc36a4       | NM_172289               | chr9       | 15514255  | 15514764  | 298                  |
| Cmtm3         | NM_024217               | chr8       | 106864562 | 106865020 | 298                  |
| Lysmd2        | NM_027309               | chr9       | 75473672  | 75474002  | 299                  |
| Hivep2        | NM_010437               | chr10      | 13686301  | 13686667  | 300                  |
| Rab33b        | NM_016858               | chr3       | 51288084  | 51288290  | 300                  |
| Ing5          | NM_025454               | chr1       | 95700647  | 95701039  | 302                  |
| Clk2          | NM_007712               | chr3       | 88968866  | 88969190  | 302                  |
| Bola1         | NM_026975               | chr3       | 96001008  | 96001404  | 302                  |
| Grk5          | NM_018869               | chr19      | 60965733  | 60966178  | 305                  |
| Wdr63         | NM_172864               | chr3       | 145770505 | 145770883 | 305                  |
| Fxn           | NM_008044               | chr19      | 24354530  | 24355009  | 306                  |
| Polr1c        | NM_009085               | chr17      | 46384547  | 46384817  | 311                  |
| Fbxl4         | NM_172988               | chr4       | 22284844  | 22285159  | 313                  |
| Csnk1d        | NM_139059               | chr11      | 120852167 | 120852491 | 317                  |
| Camk1d        | NM_177343               | chr2       | 5635254   | 5635726   | 317                  |
| Tbc1d4        | NM_001081278            | chr14      | 102007869 | 102008308 | 319                  |
| Ints7         | NM_178632               | chr1       | 193399800 | 193400062 | 319                  |
| Vps72         | NM_009336               | chr3       | 94915169  | 94915397  | 320                  |
| Cep83os       | NR_015524               | chr10      | 94150869  | 94151203  | 321                  |
| Tln1          | NM_011602               | chr4       | 43574993  | 43575273  | 321                  |
| Zfp248        | NM_028335               | chr6       | 118405038 | 118405362 | 323                  |
| Zhx3          | NM_177263               | chr2       | 160698308 | 160698495 | 324                  |
| Ahctf1        | NM_026375               | chr1       | 181733596 | 181734046 | 324                  |
| Lbr           | NM_133815               | chr1       | 183772022 | 183772384 | 328                  |
| Ahcy          | NM_016661               | chr2       | 154899754 | 154900052 | 329                  |
| Gcfc2         | NM_177884               | chr6       | 81873813  | 81874170  | 330                  |
| Plod3         | NM_011962               | chr5       | 137463030 | 137463408 | 331                  |
| Pomgnt2       | NM_153540               | chr9       | 121904571 | 121905053 | 331                  |

**Supplemental Table 4. Significant ChIP-seq E2F3B promoter peaks  
(+/- 2kb from the TSS)**

| Gene Symbol | Refseq<br>Transcript ID | Chromosome | Start     | End       | distance<br>from TSS |
|-------------|-------------------------|------------|-----------|-----------|----------------------|
| Gtf3c5      | NM_001290484            | chr2       | 28438177  | 28438756  | 332                  |
| Tpm4        | NM_001001491            | chr8       | 74659248  | 74659795  | 332                  |
| Brd2        | NR_037970               | chr17      | 34256042  | 34256982  | 332                  |
| Ing3        | NM_023626               | chr6       | 21899813  | 21900079  | 332                  |
| Sec62       | NM_027016               | chr3       | 30691977  | 30692283  | 333                  |
| Pgm2        | NM_028132               | chr4       | 99602196  | 99602582  | 334                  |
| Chpf        | NM_001001565            | chr1       | 75475465  | 75475956  | 335                  |
| Nudt5       | NM_016918               | chr2       | 5766257   | 5766574   | 337                  |
| Sys1        | NM_025575               | chr2       | 164286581 | 164287033 | 337                  |
| Chst3       | NM_016803               | chr10      | 59681421  | 59681918  | 338                  |
| Raly        | NM_001139513            | chr2       | 154617006 | 154617360 | 338                  |
| Fasn        | NM_007988               | chr11      | 120685339 | 120685704 | 339                  |
| Foxm1       | NM_008021               | chr6       | 128313221 | 128313479 | 339                  |
| Ngf         | NM_013609               | chr3       | 102274002 | 102274360 | 340                  |
| Gm8773      | NR_033499               | chr5       | 5573949   | 5574332   | 343                  |
| Nme2        | NM_001077529            | chr11      | 93816627  | 93816877  | 344                  |
| Tenc1       | NM_153533               | chr15      | 101933622 | 101933903 | 345                  |
| Cops4       | NM_012001               | chr5       | 100947544 | 100947801 | 346                  |
| Sec24a      | NM_175255               | chr11      | 51569869  | 51570108  | 347                  |
| Tubb4b      | NM_146116               | chr2       | 25079701  | 25080044  | 349                  |
| Adar        | NM_001146296            | chr3       | 89534816  | 89535161  | 350                  |
| B3glct      | NM_001081204            | chr5       | 150481035 | 150481326 | 350                  |
| Exosc8      | NM_001163570            | chr3       | 54538615  | 54539250  | 353                  |
| Pyurf       | NM_025574               | chr6       | 57641589  | 57641848  | 353                  |
| Poc1b       | NM_027740               | chr10      | 98570006  | 98570311  | 355                  |
| Rcc1        | NM_001197082            | chr4       | 131901200 | 131901418 | 355                  |
| Cep97       | NM_028815               | chr16      | 55934486  | 55934723  | 356                  |
| Ube4b       | NM_022022               | chr4       | 148800224 | 148800543 | 356                  |
| Ctps        | NM_016748               | chr4       | 120242215 | 120242833 | 356                  |
| Get4        | NM_026269               | chr5       | 139728467 | 139728803 | 358                  |
| Zfp191      | NM_021559               | chr18      | 24178751  | 24179074  | 359                  |
| Rhbdf1      | NM_001291818            | chr11      | 32121739  | 32122127  | 359                  |
| Hdlbp       | NM_133808               | chr1       | 95374872  | 95375177  | 360                  |
| Cfl1        | NM_007687               | chr19      | 5490639   | 5490990   | 361                  |
| Spidr       | NM_146068               | chr16      | 16146408  | 16146753  | 363                  |
| Sapcd2      | NM_001081085            | chr2       | 25227816  | 25228017  | 363                  |
| Lrrc75b     | NM_198860               | chr10      | 75022452  | 75022969  | 364                  |
| Matn2       | NM_016762               | chr15      | 34236648  | 34236949  | 364                  |
| Klhdc2      | NM_027117               | chr12      | 70397849  | 70398215  | 365                  |
| Stip1       | NM_016737               | chr19      | 7113955   | 7114345   | 365                  |
| Tacc3       | NM_001040435            | chr5       | 34000982  | 34001342  | 367                  |
| Klf11       | NM_178357               | chr12      | 25336400  | 25336806  | 368                  |
| Zfp91Cntf   | NR_024093               | chr19      | 12870006  | 12870482  | 368                  |
| Mcm9        | NM_027830               | chr10      | 53349630  | 53350116  | 371                  |
| Nsmce4a     | NM_001162855            | chr7       | 137690311 | 137690735 | 371                  |
| Cers6       | NM_172856               | chr2       | 68699817  | 68700152  | 372                  |
| Pfkm        | NM_001163488            | chr15      | 97923274  | 97923508  | 372                  |
| Lhfpl2      | NM_172589               | chr13      | 94827939  | 94828310  | 375                  |

**Supplemental Table 4. Significant ChIP-seq E2F3B promoter peaks  
(+/- 2kb from the TSS)**

| Gene Symbol   | Refseq<br>Transcript ID | Chromosome | Start     | End       | distance<br>from TSS |
|---------------|-------------------------|------------|-----------|-----------|----------------------|
| Tead4         | NM_011567               | chr6       | 128250257 | 128250650 | 377                  |
| Nhlrc2        | NM_025811               | chr19      | 56622893  | 56623363  | 378                  |
| Eif4e2        | NM_001039169            | chr1       | 89110796  | 89110990  | 380                  |
| Tfam          | NM_009360               | chr10      | 70700269  | 70700552  | 381                  |
| Mier1         | NM_001286222            | chr4       | 102787177 | 102787574 | 382                  |
| Gas2          | NM_008087               | chr7       | 59134706  | 59135085  | 382                  |
| Tuba1b        | NM_011654               | chr15      | 98764196  | 98764674  | 385                  |
| Fbxo9         | NM_023605               | chr9       | 77955875  | 77956278  | 386                  |
| Bnip1         | NM_172149               | chr17      | 26918250  | 26918575  | 390                  |
| Mrpl34        | NM_053162               | chr8       | 73988993  | 73989434  | 390                  |
| Trmt10a       | NM_175389               | chr3       | 137806744 | 137807043 | 393                  |
| Prmt3         | NM_133740               | chr7       | 57033965  | 57034276  | 394                  |
| E2f3          | NM_010093               | chr13      | 30077319  | 30077752  | 396                  |
| Mepce         | NM_144913               | chr5       | 138227357 | 138227708 | 396                  |
| Seh1l         | NM_001039088            | chr18      | 67934737  | 67935116  | 398                  |
| Msl3          | NM_010832               | chrX       | 165111217 | 165111654 | 398                  |
| Ncl           | NM_010880               | chr1       | 88255423  | 88255832  | 402                  |
| Zfp787        | NM_001013012            | chr7       | 6106990   | 6107351   | 402                  |
| Shmt2         | NM_001252316            | chr10      | 126958788 | 126959405 | 403                  |
| 1200014J11Rik | NM_025818               | chr11      | 72861568  | 72861974  | 403                  |
| Oxsr1         | NM_133985               | chr9       | 119230947 | 119231328 | 407                  |
| Zfp180        | NM_001045486            | chr7       | 24867111  | 24867533  | 407                  |
| Brd2          | NM_001204973            | chr17      | 34258852  | 34259435  | 408                  |
| Vamp3         | NM_009498               | chr4       | 150431555 | 150431752 | 408                  |
| Ibtk          | NM_001081282            | chr9       | 85642408  | 85642657  | 408                  |
| Zmym4         | NM_001114399            | chr4       | 126644586 | 126644927 | 410                  |
| Mettl9        | NM_021554               | chr7       | 128178142 | 128178597 | 412                  |
| Actr1a        | NM_016860               | chr19      | 46469644  | 46469975  | 415                  |
| Pbx3          | NM_016768               | chr2       | 34226965  | 34227334  | 415                  |
| Fbxo7         | NM_153195               | chr10      | 85484855  | 85485321  | 415                  |
| Pxdn          | NM_181395               | chr12      | 30623136  | 30623494  | 415                  |
| Fam19a2       | NM_182807               | chr10      | 122701410 | 122701683 | 416                  |
| Ddrk1         | NM_029832               | chr2       | 130489776 | 130490153 | 416                  |
| Ift81         | NM_009879               | chr5       | 123063930 | 123064290 | 416                  |
| Pla2g4a       | NM_008869               | chr1       | 151807853 | 151808132 | 421                  |
| Cep78         | NM_198019               | chr19      | 16058828  | 16059287  | 421                  |
| Bloc1s1       | NM_015740               | chr10      | 128360055 | 128360254 | 425                  |
| Sephs1        | NM_175400               | chr2       | 4802733   | 4803334   | 425                  |
| Pbrm1         | NM_001081251            | chr14      | 31832641  | 31832855  | 425                  |
| Bcl7b         | NM_009745               | chr5       | 135644472 | 135644862 | 426                  |
| Aspscr1       | NM_026877               | chr11      | 120534561 | 120534864 | 427                  |
| Smarbcb1      | NM_001161853            | chr10      | 75383671  | 75384185  | 430                  |
| Rac1          | NM_009007               | chr5       | 144288297 | 144288563 | 430                  |
| Ubtf          | NM_001044383            | chr11      | 102177937 | 102178401 | 431                  |
| Hmga2         | NM_010441               | chr10      | 119913384 | 119913730 | 433                  |
| Ndufaf3       | NM_023247               | chr9       | 108469092 | 108469385 | 434                  |
| Dock1         | NM_001033420            | chr7       | 141862577 | 141863029 | 434                  |
| Rbbp8         | NM_001081223            | chr18      | 11816135  | 11816449  | 435                  |

**Supplemental Table 4. Significant ChIP-seq E2F3B promoter peaks (+/- 2kb from the TSS)**

| Gene Symbol   | Refseq Transcript ID | Chromosome | Start     | End       | distance from TSS |
|---------------|----------------------|------------|-----------|-----------|-------------------|
| Slc25a4       | NM_007450            | chr8       | 47295746  | 47296104  | 437               |
| Zkscan17      | NM_001291014         | chr11      | 59319448  | 59319958  | 438               |
| 4632428C04Rik | NR_033631            | chr16      | 30008916  | 30009464  | 438               |
| G730013B05Rik | NR_040379            | chr16      | 50528938  | 50529166  | 438               |
| Srsf7         | NM_146083            | chr17      | 80605998  | 80606414  | 438               |
| Hira          | NM_010435            | chr16      | 18877163  | 18877398  | 439               |
| 2700081O15Rik | NM_175381            | chr19      | 7492451   | 7492654   | 439               |
| Sdc1          | NM_011519            | chr12      | 8778357   | 8778926   | 441               |
| Snopc2        | NM_133968            | chr8       | 4253310   | 4253773   | 441               |
| Dazap2        | NM_011873            | chr15      | 100446343 | 100446727 | 443               |
| Homer3        | NM_001146153         | chr8       | 72807178  | 72807504  | 444               |
| Pik3c2b       | NM_001099276         | chr1       | 134942865 | 134943203 | 446               |
| Hirip3        | NM_172746            | chr7       | 134005774 | 134006088 | 446               |
| Bcar1         | NM_001198839         | chr8       | 114255421 | 114255757 | 446               |
| Sp3os         | NR_045269            | chr2       | 72817802  | 72818079  | 453               |
| Tor1b         | NM_133673            | chr2       | 30808804  | 30809143  | 454               |
| Rrm2          | NM_009104            | chr12      | 25393387  | 25393760  | 456               |
| Uhrf1         | NM_001111079         | chr17      | 56442502  | 56443931  | 458               |
| Gm15417       | NR_040404            | chr3       | 89198468  | 89198869  | 458               |
| Sap130        | NM_172965            | chr18      | 31794334  | 31794658  | 460               |
| Carhsp1       | NM_025821            | chr16      | 8671600   | 8671968   | 461               |
| Bcl2l1        | NM_009743            | chr2       | 152656870 | 152657132 | 462               |
| Supt16        | NM_033618            | chr14      | 52816276  | 52816613  | 469               |
| Brpf3         | NM_001081315         | chr17      | 28938361  | 28938722  | 472               |
| Zfp651        | NM_001166644         | chr9       | 121669428 | 121669818 | 473               |
| B230208H11Rik | NR_038028            | chr10      | 12642131  | 12642767  | 475               |
| Cirbp         | NM_007705            | chr10      | 79630877  | 79631246  | 477               |
| Rell1         | NM_145923            | chr5       | 64359490  | 64359827  | 477               |
| Eif1          | NM_011508            | chr11      | 100181596 | 100181977 | 478               |
| Ctdspl        | NM_133710            | chr9       | 118835956 | 118836305 | 478               |
| Pcif1         | NM_146129            | chr2       | 164705129 | 164705562 | 479               |
| Lzts2         | NM_001130526         | chr19      | 45092939  | 45093271  | 481               |
| Calm2         | NM_007589            | chr17      | 87845657  | 87845928  | 482               |
| ChkbCpt1b     | NR_004843            | chr15      | 89259786  | 89259955  | 487               |
| Etv4          | NM_008815            | chr11      | 101646024 | 101646248 | 487               |
| Elavl4        | NM_001163397         | chr4       | 110023872 | 110024184 | 487               |
| Phf20         | NM_172674            | chr2       | 156022724 | 156023017 | 489               |
| Pmm1          | NM_001282040         | chr15      | 81790738  | 81790999  | 491               |
| Bcdin3d       | NM_029236            | chr15      | 99304495  | 99304839  | 493               |
| Stub1         | NM_019719            | chr17      | 25969511  | 25970113  | 493               |
| Mcm7          | NM_008568            | chr5       | 138612460 | 138612731 | 494               |
| Med16         | NM_001163276         | chr10      | 79371017  | 79371355  | 496               |
| Cdkn2aip      | NM_172407            | chr8       | 48798538  | 48799038  | 496               |
| Gm6793        | NR_033513            | chr2       | 75497633  | 75498067  | 504               |
| Pcbp2         | NM_011042            | chr15      | 102301409 | 102301724 | 505               |
| Kansl3        | NM_172652            | chr1       | 36425304  | 36425734  | 506               |
| Eef1b2        | NM_018796            | chr1       | 63223771  | 63224049  | 506               |
| Rnf149        | NM_001033135         | chr1       | 39633544  | 39633819  | 510               |



**Supplemental Table 4. Significant ChIP-seq E2F3B promoter peaks  
(+/- 2kb from the TSS)**

| Gene Symbol   | Refseq<br>Transcript ID | Chromosome | Start     | End       | distance<br>from TSS |
|---------------|-------------------------|------------|-----------|-----------|----------------------|
| 4930539J05Rik | NR_030689               | chr3       | 135100882 | 135101354 | 510                  |
| Plec          | NM_201392               | chr15      | 76029136  | 76029512  | 511                  |
| Espn          | NM_019585               | chr4       | 151502416 | 151502619 | 516                  |
| Cnih4         | NM_030131               | chr1       | 183081408 | 183081746 | 516                  |
| Tra2b         | NM_009186               | chr16      | 22265242  | 22265728  | 516                  |
| Psip1         | NM_133948               | chr4       | 83131642  | 83132026  | 517                  |
| BC051226      | NR_045146               | chr17      | 34045471  | 34045733  | 520                  |
| Rrm1          | NM_009103               | chr7       | 109590588 | 109590870 | 521                  |
| B3gnt9        | NM_178879               | chr8       | 107778399 | 107778659 | 523                  |
| Srsf4         | NM_020587               | chr4       | 131429871 | 131430283 | 524                  |
| Eed           | NM_021876               | chr7       | 97128785  | 97129135  | 525                  |
| Ino80         | NM_026574               | chr2       | 119302657 | 119303018 | 527                  |
| Meaf6         | NM_001290701            | chr4       | 124762763 | 124763050 | 530                  |
| Midn          | NM_021565               | chr10      | 79611416  | 79611713  | 531                  |
| Pnn           | NM_008891               | chr12      | 60168251  | 60168620  | 531                  |
| Tmem165       | NM_011626               | chr5       | 76613219  | 76613654  | 533                  |
| Fkbp5         | NM_010220               | chr17      | 28622374  | 28622736  | 538                  |
| Ubr5          | NM_001081359            | chr15      | 38007890  | 38008248  | 539                  |
| B3galnt1      | NM_020026               | chr3       | 69402190  | 69402492  | 540                  |
| Eea1          | NM_001001932            | chr10      | 95403713  | 95403961  | 541                  |
| Rbl1          | NM_011249               | chr2       | 157029547 | 157029906 | 543                  |
| Id4           | NM_031166               | chr13      | 48357164  | 48357512  | 543                  |
| A930005H10Rik | NR_027894               | chr3       | 115590309 | 115590548 | 548                  |
| Hmgn2         | NM_016957               | chr4       | 133522964 | 133523746 | 550                  |
| Rangap1       | NM_001146174            | chr15      | 81559672  | 81559922  | 551                  |
| Smc1a         | NM_019710               | chrX       | 148451376 | 148451668 | 552                  |
| Ktn1          | NM_001293635            | chr14      | 48269335  | 48269740  | 553                  |
| Epc2          | NM_172663               | chr2       | 49307406  | 49307717  | 557                  |
| Suv420h1      | NM_001167886            | chr19      | 3767781   | 3768178   | 560                  |
| Scaf4         | NM_178923               | chr16      | 90283943  | 90284274  | 561                  |
| Hist2h4       | NM_033596               | chr3       | 96066494  | 96066860  | 562                  |
| Wnk1          | NM_198703               | chr6       | 119987909 | 119988311 | 562                  |
| Pcna          | NM_011045               | chr2       | 132078051 | 132078648 | 566                  |
| Ncapd3        | NM_178113               | chr9       | 26838155  | 26838502  | 570                  |
| Pkd1          | NM_013630               | chr17      | 24687314  | 24687615  | 571                  |
| Ctdsp1        | NM_153088               | chr1       | 74438429  | 74439085  | 575                  |
| Gm13375       | NR_033225               | chr2       | 20890932  | 20891219  | 576                  |
| Ggnbp2        | NM_153144               | chr11      | 84683377  | 84683946  | 578                  |
| MsrA          | NM_001253715            | chr14      | 65059082  | 65059474  | 584                  |
| Nfx1          | NM_023739               | chr4       | 40918418  | 40918700  | 584                  |
| Ttc39b        | NM_027238               | chr4       | 82969356  | 82969660  | 584                  |
| Ccne2         | NM_009830               | chr4       | 11119252  | 11119627  | 585                  |
| Phf19         | NM_028716               | chr2       | 34768778  | 34769036  | 588                  |
| Mir6976       | NR_105942               | chr17      | 46690157  | 46690339  | 589                  |
| Syne2         | NM_001005510            | chr12      | 76919660  | 76920129  | 591                  |
| Gpank1        | NM_001128597            | chr17      | 35258871  | 35259192  | 592                  |
| Lancl2        | NM_133737               | chr6       | 57652937  | 57653151  | 596                  |
| Pdzrn3        | NM_018884               | chr6       | 101327181 | 101327406 | 597                  |

**Supplemental Table 4. Significant ChIP-seq E2F3B promoter peaks  
(+/- 2kb from the TSS)**

| <b>Gene Symbol</b> | <b>Refseq<br/>Transcript ID</b> | <b>Chromosome</b> | <b>Start</b> | <b>End</b> | <b>distance<br/>from TSS</b> |
|--------------------|---------------------------------|-------------------|--------------|------------|------------------------------|
| Smc3               | NM_007790                       | chr19             | 53675197     | 53675767   | 597                          |
| Ttc7               | NM_028639                       | chr17             | 87682649     | 87682997   | 598                          |
| Slc7a1             | NM_007513                       | chr5              | 149210736    | 149211022  | 600                          |
| Hnrnp1             | NM_177301                       | chr7              | 29596296     | 29596722   | 601                          |
| Camkk1             | NM_018883                       | chr11             | 72832937     | 72833284   | 602                          |
| Mbd3               | NM_013595                       | chr10             | 79861458     | 79861783   | 603                          |
| Tgif2              | NM_173396                       | chr2              | 156666195    | 156666494  | 603                          |
| Jade1              | NM_001130186                    | chr3              | 41369228     | 41369580   | 603                          |
| Gmps               | NM_001033300                    | chr3              | 63780533     | 63780805   | 605                          |
| Tpm3               | NM_001271764                    | chr3              | 89883873     | 89884222   | 606                          |
| Top3b              | NM_011624                       | chr16             | 16871418     | 16871769   | 611                          |
| Map1s              | NM_173013                       | chr8              | 73430312     | 73430656   | 612                          |
| Kat6b              | NM_017479                       | chr14             | 22319312     | 22319926   | 613                          |
| Rock2              | NM_009072                       | chr12             | 16902220     | 16902582   | 618                          |
| Sbf2               | NM_177324                       | chr7              | 117757683    | 117757943  | 620                          |
| Gpc6               | NM_001079844                    | chr14             | 117324964    | 117325313  | 621                          |
| Rhoa               | NM_016802                       | chr9              | 108209059    | 108209268  | 629                          |
| Smарce1            | NM_020618                       | chr11             | 99091506     | 99091871   | 642                          |
| Ap3m1              | NM_018829                       | chr14             | 21870858     | 21871184   | 642                          |
| Stim2              | NM_001081103                    | chr5              | 54390230     | 54390587   | 648                          |
| Mafg               | NM_010756                       | chr11             | 120494036    | 120494386  | 649                          |
| Cnn3               | NM_028044                       | chr3              | 121129824    | 121130392  | 650                          |
| Srrm1              | NM_001130477                    | chr4              | 134908269    | 134908677  | 655                          |
| Zc3h7a             | NM_145931                       | chr16             | 11175658     | 11176001   | 656                          |
| Xiap               | NM_009688                       | chrX              | 39421177     | 39422158   | 656                          |
| Spsb2              | NM_013539                       | chr6              | 124759458    | 124759771  | 657                          |
| Tmem74b            | NM_001160363                    | chr2              | 151528226    | 151528575  | 658                          |
| Dhx15              | NM_007839                       | chr5              | 52580936     | 52581315   | 659                          |
| Morf411            | NM_001039147                    | chr9              | 90008793     | 90009188   | 667                          |
| Laptm4a            | NM_008640                       | chr12             | 8928637      | 8928924    | 669                          |
| Ccna2              | NM_009828                       | chr3              | 36470034     | 36470458   | 671                          |
| Rrp7a              | NM_029101                       | chr15             | 82952454     | 82952663   | 672                          |
| Kitl               | NM_013598                       | chr10             | 99478953     | 99479305   | 672                          |
| Stag1              | NM_009282                       | chr9              | 100544481    | 100544950  | 675                          |
| Fzd5               | NM_001042659                    | chr1              | 64783483     | 64783800   | 682                          |
| Rabl6              | NM_001024616                    | chr2              | 25463069     | 25463495   | 683                          |
| B4galt1            | NM_022305                       | chr4              | 40800647     | 40801125   | 683                          |
| Snn                | NM_009223                       | chr16             | 11066904     | 11067249   | 687                          |
| Luc7l2             | NM_001170848                    | chr6              | 38501916     | 38502344   | 687                          |
| Stmn1              | NM_019641                       | chr4              | 134024732    | 134025125  | 695                          |
| Mthfd1l            | NM_001170785                    | chr10             | 6372421      | 6373117    | 696                          |
| Ankrd12            | NM_001025572                    | chr17             | 66425554     | 66425821   | 698                          |
| Pomt1              | NM_145145                       | chr2              | 32092765     | 32093042   | 702                          |
| Vav2               | NM_009500                       | chr2              | 27281487     | 27281797   | 702                          |
| Ep400              | NM_029337                       | chr5              | 111198863    | 111199195  | 706                          |
| Kat2b              | NM_020005                       | chr17             | 53706889     | 53707123   | 711                          |
| Tnfrsf12a          | NM_013749                       | chr17             | 23813474     | 23813916   | 720                          |
| Tmem245            | NM_175518                       | chr4              | 56959314     | 56959840   | 723                          |

**Supplemental Table 4. Significant ChIP-seq E2F3B promoter peaks  
(+/- 2kb from the TSS)**

| Gene Symbol   | Refseq<br>Transcript ID | Chromosome | Start     | End       | distance<br>from TSS |
|---------------|-------------------------|------------|-----------|-----------|----------------------|
| Pogz          | NM_001165948            | chr3       | 94642101  | 94642324  | 725                  |
| Ubc           | NM_019639               | chr5       | 125869454 | 125869863 | 728                  |
| Hnrnpa2b1     | NM_016806               | chr6       | 51418951  | 51419372  | 731                  |
| Celsr3        | NM_080437               | chr9       | 108729231 | 108729536 | 734                  |
| Cebpd         | NM_007679               | chr16      | 15887950  | 15888279  | 737                  |
| Tyms          | NM_021288               | chr5       | 30399173  | 30399677  | 739                  |
| Slc38a1       | NM_134086               | chr15      | 96471500  | 96471803  | 741                  |
| Pprc1         | NM_001081214            | chr19      | 46131671  | 46131878  | 747                  |
| Spred1        | NM_033524               | chr2       | 116947417 | 116947695 | 750                  |
| Pan3          | NM_028291               | chr5       | 148242762 | 148243052 | 752                  |
| Helt          | NM_173789               | chr8       | 47379098  | 47379434  | 758                  |
| Slc6a9        | NM_008135               | chr4       | 117508483 | 117508759 | 759                  |
| Nasp          | NM_001081475            | chr4       | 116299020 | 116299651 | 766                  |
| Fus           | NM_139149               | chr7       | 135111632 | 135111886 | 767                  |
| Fbxo5         | NM_025995               | chr10      | 4541582   | 4542114   | 773                  |
| 9930021J03Rik | NM_172836               | chr19      | 29879552  | 29879890  | 777                  |
| Actb          | NM_007393               | chr5       | 143667354 | 143667890 | 780                  |
| Hnrnpab       | NM_010448               | chr11      | 51419432  | 51419762  | 785                  |
| Zfp623        | NM_030199               | chr15      | 75772001  | 75772336  | 788                  |
| Myo10         | NM_019472               | chr15      | 25552991  | 25553197  | 790                  |
| Phldb2        | NM_001252442            | chr16      | 45843528  | 45843861  | 796                  |
| Rcbtb2        | NR_033185               | chr14      | 73543254  | 73543520  | 796                  |
| Gatad1        | NM_026033               | chr5       | 3646960   | 3647318   | 796                  |
| Fam195b       | NM_001033231            | chr11      | 120410088 | 120410394 | 799                  |
| Atp2a2        | NM_009722               | chr5       | 122951203 | 122951657 | 803                  |
| Lpp           | NM_001145952            | chr16      | 24448765  | 24449200  | 807                  |
| Gapdh         | NM_008084               | chr6       | 125114903 | 125115063 | 807                  |
| Ivns1abp      | NM_001039512            | chr1       | 153192315 | 153192577 | 819                  |
| Zbtb7a        | NM_010731               | chr10      | 80599670  | 80600004  | 822                  |
| Tbc1d9        | NM_027758               | chr8       | 85689949  | 85690203  | 826                  |
| Mir3109       | NR_037296               | chr9       | 69305407  | 69305768  | 838                  |
| Ska2          | NM_025377               | chr11      | 86923481  | 86923729  | 843                  |
| Gt(ROSA)26Sor | NR_027010               | chr6       | 113025897 | 113026882 | 848                  |
| Azin1         | NM_018745               | chr15      | 38448007  | 38448335  | 849                  |
| 4930579G18Rik | NR_038053               | chr14      | 55270059  | 55270344  | 855                  |
| Ndrp1         | NM_008681               | chr15      | 66800066  | 66800629  | 855                  |
| Kpnb1         | NM_008379               | chr11      | 97048174  | 97048525  | 856                  |
| Mcm7          | NM_008568               | chr5       | 138612115 | 138612350 | 857                  |
| Hist1h2bn     | NM_178201               | chr13      | 21846655  | 21847042  | 858                  |
| Pnrc1         | NM_001033225            | chr4       | 33334729  | 33335075  | 859                  |
| Hnrnpd        | NM_007516               | chr5       | 100406910 | 100407281 | 861                  |
| Dusp22        | NM_001037955            | chr13      | 30752624  | 30752954  | 862                  |
| Acly          | NM_001199296            | chr11      | 100388219 | 100388672 | 868                  |
| Anp32b        | NM_130889               | chr4       | 46464757  | 46464961  | 871                  |
| B3gnt9        | NM_178879               | chr8       | 107778034 | 107778315 | 878                  |
| Phldb1        | NM_153537               | chr9       | 44542113  | 44542692  | 878                  |
| Dennd4a       | NM_001162917            | chr9       | 64659530  | 64659861  | 879                  |
| Lancl2        | NM_133737               | chr6       | 57653198  | 57653458  | 880                  |

**Supplemental Table 4. Significant ChIP-seq E2F3B promoter peaks  
(+/- 2kb from the TSS)**

| Gene Symbol   | Refseq<br>Transcript ID | Chromosome | Start     | End       | distance<br>from TSS |
|---------------|-------------------------|------------|-----------|-----------|----------------------|
| Id3           | NM_008321               | chr4       | 135700398 | 135700836 | 881                  |
| Fam19a2       | NM_182807               | chr10      | 122701831 | 122702194 | 882                  |
| Chd3os        | NR_027827               | chr11      | 69155035  | 69155269  | 882                  |
| Dleu2         | NR_028264               | chr14      | 62300074  | 62300558  | 893                  |
| Pkd2          | NM_008861               | chr5       | 104889141 | 104889602 | 897                  |
| Rrbp1         | NM_024281               | chr2       | 143835785 | 143836417 | 897                  |
| Dnm1          | NM_010065               | chr2       | 32207697  | 32208153  | 898                  |
| Hist1h1c      | NM_015786               | chr13      | 23831396  | 23831762  | 904                  |
| Tubb6         | NM_026473               | chr18      | 67551128  | 67551469  | 915                  |
| Inpp1         | NM_001122739            | chr7       | 108985247 | 108985597 | 915                  |
| 2310045N01Rik | NM_001145552            | chr8       | 72664410  | 72664644  | 916                  |
| Fstl3         | NM_031380               | chr10      | 79240731  | 79241163  | 929                  |
| Wee1          | NM_009516               | chr7       | 117266276 | 117266745 | 939                  |
| Dnmt1         | NM_001199433            | chr9       | 20756013  | 20756231  | 944                  |
| Kdm3b         | NM_001081256            | chr18      | 34937524  | 34937712  | 957                  |
| Lrrc29        | NM_177449               | chr8       | 107849027 | 107849402 | 961                  |
| Ltbp4         | NM_175641               | chr7       | 28121558  | 28121775  | 964                  |
| Mcm9          | NM_027830               | chr10      | 53349151  | 53349409  | 964                  |
| Cand1         | NM_027994               | chr10      | 118675899 | 118676380 | 971                  |
| Eif4ebp1      | NM_007918               | chr8       | 28371558  | 28371984  | 973                  |
| Gsr           | NM_010344               | chr8       | 34764460  | 34764906  | 974                  |
| Tfap4         | NM_031182               | chr16      | 4558549   | 4558927   | 981                  |
| Gtf2i         | NM_001080748            | chr5       | 134789456 | 134789810 | 996                  |
| Myo1d         | NM_177390               | chr11      | 80592371  | 80592675  | 1003                 |
| Eif4a1        | NM_144958               | chr11      | 69484655  | 69485172  | 1011                 |
| Sec31b        | NM_001033343            | chr19      | 44619165  | 44619483  | 1013                 |
| Zbtb2         | NM_001033466            | chr10      | 5959325   | 5959569   | 1015                 |
| Ahnak         | NM_001286518            | chr19      | 9064623   | 9064954   | 1016                 |
| Spry1         | NM_011896               | chr3       | 37539765  | 37540008  | 1016                 |
| Lrch1         | NM_001033439            | chr14      | 75346497  | 75346825  | 1022                 |
| Nuak1         | NM_001004363            | chr10      | 83902025  | 83902357  | 1024                 |
| Ltbp3         | NM_008520               | chr19      | 5741705   | 5742186   | 1043                 |
| Zfpm2         | NM_011766               | chr15      | 40487511  | 40487751  | 1044                 |
| Mnt           | NM_010813               | chr11      | 74645340  | 74645632  | 1061                 |
| Sin3a         | NM_001110351            | chr9       | 56920705  | 56921131  | 1072                 |
| 1700123M08Rik | NR_040577               | chr4       | 11894653  | 11894941  | 1077                 |
| Sft2d3        | NM_026006               | chr18      | 32070322  | 32070635  | 1078                 |
| Arhgef25      | NM_001166413            | chr10      | 126625556 | 126626043 | 1079                 |
| Tubb5         | NM_011655               | chr17      | 35973955  | 35974345  | 1095                 |
| Pde5a         | NM_153422               | chr3       | 122432927 | 122433413 | 1095                 |
| Pmp22         | NM_008885               | chr11      | 62945852  | 62946384  | 1107                 |
| Ttc7          | NM_028639               | chr17      | 87683106  | 87683564  | 1110                 |
| Gas1          | NM_008086               | chr13      | 60277635  | 60277924  | 1116                 |
| Coq10a        | NM_001081040            | chr10      | 127805700 | 127806247 | 1119                 |
| Sfpq          | NR_045010               | chr4       | 126699581 | 126699747 | 1120                 |
| Map1lc3b      | NM_026160               | chr8       | 124115376 | 124115605 | 1124                 |
| Mettl24       | NM_177793               | chr10      | 40404077  | 40404345  | 1124                 |
| Hist1h4h      | NM_153173               | chr13      | 23623844  | 23624236  | 1128                 |

**Supplemental Table 4. Significant ChIP-seq E2F3B promoter peaks  
(+/- 2kb from the TSS)**

| Gene Symbol   | Refseq<br>Transcript ID | Chromosome | Start     | End       | distance<br>from TSS |
|---------------|-------------------------|------------|-----------|-----------|----------------------|
| Aim1          | NM_172393               | chr10      | 43723396  | 43723601  | 1153                 |
| Jund          | NM_010592               | chr8       | 73222544  | 73223036  | 1153                 |
| Lmnb1         | NM_010721               | chr18      | 56868504  | 56868763  | 1168                 |
| Hmgb1         | NM_010439               | chr5       | 149863273 | 149863607 | 1172                 |
| Trp53         | NM_001127233            | chr11      | 69394913  | 69395159  | 1176                 |
| Set           | NM_023871               | chr2       | 29918520  | 29918882  | 1186                 |
| Ncoa2         | NM_008678               | chr1       | 13362766  | 13363184  | 1188                 |
| Ddx26b        | NM_172779               | chrX       | 53708984  | 53709423  | 1189                 |
| Slc1a5        | NM_009201               | chr7       | 17367707  | 17368071  | 1195                 |
| Rai1          | NM_009021               | chr11      | 59919550  | 59919887  | 1205                 |
| Hmga1-rs1     | NM_001166477            | chr17      | 27694686  | 27694923  | 1208                 |
| Hoxb9         | NM_008270               | chr11      | 96133623  | 96134098  | 1218                 |
| Ptn           | NM_008973               | chr6       | 36759946  | 36760338  | 1218                 |
| Wnt5a         | NM_009524               | chr14      | 29319763  | 29320017  | 1232                 |
| Gpc6          | NM_001079844            | chr14      | 117325521 | 117325989 | 1237                 |
| Hnrnpu        | NM_016805               | chr1       | 180266495 | 180266847 | 1243                 |
| Foxh1         | NM_007989               | chr15      | 76498991  | 76499271  | 1246                 |
| Ptprg         | NM_008981               | chr14      | 12387127  | 12387519  | 1257                 |
| Cnppd1        | NM_026977               | chr1       | 75137544  | 75137816  | 1261                 |
| Vcan          | NM_001081249            | chr13      | 89880714  | 89880983  | 1268                 |
| Ftx           | NR_028381               | chrX       | 100817704 | 100817935 | 1273                 |
| Scarf2        | NM_153790               | chr16      | 17798477  | 17798819  | 1274                 |
| Vegfa         | NM_001287057            | chr17      | 46167878  | 46168173  | 1300                 |
| Ckap4         | NM_175451               | chr10      | 83995067  | 83995552  | 1323                 |
| Klf1          | NM_010635               | chr8       | 87426996  | 87427305  | 1325                 |
| Hnrnpd        | NM_007516               | chr5       | 100406422 | 100406836 | 1327                 |
| Prrx1         | NM_011127               | chr1       | 165242283 | 165242600 | 1339                 |
| Pim1          | NM_008842               | chr17      | 29629246  | 29629447  | 1358                 |
| Angptl6       | NM_145154               | chr9       | 20682519  | 20683066  | 1361                 |
| Metap2        | NM_019648               | chr10      | 93352465  | 93352697  | 1365                 |
| Lrp8          | NM_001080926            | chr4       | 107476092 | 107476370 | 1368                 |
| Ptma          | NM_008972               | chr1       | 88424235  | 88425141  | 1378                 |
| Zbtb7a        | NM_010731               | chr10      | 80600273  | 80600556  | 1400                 |
| Mrgbp         | NM_028479               | chr2       | 180317280 | 180317612 | 1438                 |
| Sdc1          | NM_011519               | chr12      | 8779445   | 8779852   | 1448                 |
| 9130024F11Rik | NR_024326               | chr1       | 57029492  | 57030064  | 1466                 |
| 5031425E22Rik | NR_040469               | chr5       | 22938515  | 22938875  | 1475                 |
| Rnf122        | NM_175136               | chr8       | 32223627  | 32223985  | 1489                 |
| Loxl1         | NM_010729               | chr9       | 58159358  | 58159684  | 1497                 |
| Csrnp1        | NM_153287               | chr9       | 119892044 | 119892511 | 1498                 |
| Rnd1          | NM_172612               | chr15      | 98506204  | 98506568  | 1505                 |
| 1110001J03Rik | NM_025363               | chr6       | 38486247  | 38486566  | 1547                 |
| Stk25         | NM_021537               | chr1       | 95530631  | 95530849  | 1563                 |
| Elov6         | NM_130450               | chr3       | 129236686 | 129237063 | 1572                 |
| 0610009L18Rik | NR_038126               | chr11      | 120211335 | 120211816 | 1585                 |
| Afap1         | NM_027373               | chr5       | 36237455  | 36237686  | 1604                 |
| Cdkn1a        | NM_007669               | chr17      | 29232028  | 29232670  | 1633                 |
| Gm17762       | NR_028378               | chr2       | 17950315  | 17950773  | 1669                 |

**Supplemental Table 4. Significant ChIP-seq E2F3B promoter peaks  
(+/- 2kb from the TSS)**

| <b>Gene Symbol</b> | <b>Refseq<br/>Transcript ID</b> | <b>Chromosome</b> | <b>Start</b> | <b>End</b> | <b>distance<br/>from TSS</b> |
|--------------------|---------------------------------|-------------------|--------------|------------|------------------------------|
| Mrgbp              | NM_028479                       | chr2              | 180317614    | 180317818  | 1708                         |
| Sin3a              | NM_001110351                    | chr9              | 56921329     | 56921782   | 1710                         |
| Myc                | NM_001177353                    | chr15             | 61818456     | 61818803   | 1735                         |
| Marcks             | NM_008538                       | chr10             | 36856704     | 36857135   | 1812                         |
| Hspg2              | NM_008305                       | chr4              | 137026426    | 137026672  | 1832                         |
| Rab17              | NM_001159725                    | chr1              | 92862229     | 92862582   | 1838                         |
| 2810049E08Rik      | NR_036594                       | chr13             | 84032498     | 84032809   | 1842                         |
| Amd2               | NM_007444                       | chr10             | 40019982     | 40020283   | 1859                         |
| Ncam1              | NM_001113204                    | chr9              | 49605136     | 49605486   | 1862                         |
| Crlf2              | NM_001164735                    | chr5              | 109985937    | 109986337  | 1874                         |
| Hes1               | NM_008235                       | chr16             | 30067251     | 30067463   | 1915                         |
| Myo1c              | NM_001080774                    | chr11             | 75467410     | 75467725   | 1917                         |
| Gnai2              | NM_008138                       | chr9              | 107535584    | 107535926  | 1917                         |
| Ppp2cb             | NM_017374                       | chr8              | 34711806     | 34712230   | 1926                         |
| Tcf7l2             | NM_001142918                    | chr19             | 55818054     | 55818417   | 1937                         |
| Hipk2              | NM_010433                       | chr6              | 38824154     | 38824343   | 1940                         |
| Gdnf               | NM_010275                       | chr15             | 7762819      | 7763100    | 1950                         |
| Adrb3              | NM_013462                       | chr8              | 28337936     | 28338227   | 1978                         |

**Supplemental Table 5. Motifs identified by HOMER (de novo) from E2F1, E2F3A and E2F3B ChIP-seq**

| Best Match/Details |                                                         | % of<br>Targets | % of<br>Backgro<br>und | % of<br>Targets -<br>% of | P-value  | Motif |
|--------------------|---------------------------------------------------------|-----------------|------------------------|---------------------------|----------|-------|
| E2F1<br>promoter   | E2F1(E2F)/Hela-E2F1-ChIP-<br>Seq(GSE22478)/Homer(0.901) | 40.13%          | 24.16%                 | <b>15.97%</b>             | 1.00E-66 |       |
|                    | MF0009.1_TRP(MYB)_class/Jaspar(<br>0.715)               | 35.49%          | 24.47%                 | <b>11.02%</b>             | 1.00E-32 |       |
|                    | E2F4(E2F)/K562-E2F4-ChIP-<br>Seq(GSE31477)/Homer(0.676) | 25.75%          | 15.74%                 | <b>10.01%</b>             | 1.00E-35 |       |
|                    | NFY(CCAAT)/Promoter/Homer(0.9<br>63)                    | 11.37%          | 3.12%                  | <b>8.25%</b>              | 1.00E-72 |       |
|                    | POL003.1_GC-box/Jaspar(0.872)                           | 15.72%          | 7.55%                  | <b>8.17%</b>              | 1.00E-40 |       |
|                    | PB0008.1_E2F2_1/Jaspar(0.854)                           | 14.01%          | 8.10%                  | <b>5.91%</b>              | 1.00E-21 |       |
|                    | ETS(ETS)/Promoter/Homer(0.970)                          | 10.12%          | 4.62%                  | <b>5.50%</b>              | 1.00E-28 |       |
|                    | NRF1/Promoter/Homer(0.925)                              | 7.78%           | 3.48%                  | <b>4.30%</b>              | 1.00E-22 |       |
|                    | GFY(?)/Promoter/Homer(0.941)                            | 2.59%           | 0.29%                  | <b>2.30%</b>              | 1.00E-36 |       |
|                    | MA0093.2_USF1/Jaspar(0.949)                             | 3.05%           | 1.09%                  | <b>1.96%</b>              | 1.00E-13 |       |

**Supplemental Table 5. Motifs identified by HOMER (de novo) from E2F1, E2F3A and E2F3B ChIP-seq**

|                   |                                                           |                     |                     |                       |                |                                                                                       |
|-------------------|-----------------------------------------------------------|---------------------|---------------------|-----------------------|----------------|---------------------------------------------------------------------------------------|
|                   | ZBTB33(Zf)/GM12878-ZBTB33-ChIP-Seq(GSE32465)/Homer(0.941) | 1.76%               | 0.40%               | <b>1.36%</b>          | 1.00E-14       |    |
|                   | PB0199.1_Zfp161_2/Jaspar(0.617)                           | 0.29%               | 0.00%               | <b>0.29%</b>          | 1.00E-12       |    |
| E2F1 non-promoter | PH0111.1_Nkx2-2/Jaspar(0.635)                             | 11.55%              | 2.61%               | <b>8.94%</b>          | 1.00E-15       |    |
|                   | <b>Best Match/Details</b>                                 | <b>% of Targets</b> | <b>% of Backgro</b> | <b>% of Targets -</b> | <b>P-value</b> | <b>Motif</b>                                                                          |
| E2F3A Promoter    | E2F7(E2F)/Hela-E2F7-ChIP-Seq(GSE32673)/Homer(0.969)       | 20.81%              | 3.07%               | <b>17.74%</b>         | #####          |    |
|                   | E2F(E2F)/Cell-Cycle-Exp/Homer(0.612)                      | 37.04%              | 21.76%              | <b>15.28%</b>         | 1.00E-26       |    |
|                   | NFY(CCAAT)/Promoter/Homer(0.957)                          | 17.07%              | 4.25%               | <b>12.82%</b>         | 1.00E-50       |    |
|                   | MA0527.1_ZBTB33/Jaspar(0.725)                             | 23.00%              | 10.19%              | <b>12.81%</b>         | 1.00E-29       |  |
|                   | Sp1(Zf)/Promoter/Homer(0.941)                             | 18.73%              | 7.98%               | <b>10.75%</b>         | 1.00E-25       |  |
|                   | NRF1/Promoter/Homer(0.928)                                | 8.43%               | 3.13%               | <b>5.30%</b>          | 1.00E-14       |  |
|                   | MA0062.2_GABPA/Jaspar(0.883)                              | 6.66%               | 1.79%               | <b>4.87%</b>          | 1.00E-17       |  |



**Supplemental Table 5. Motifs identified by HOMER (de novo) from E2F1, E2F3A and E2F3B ChIP-seq**

|                    | PB0008.1_E2F2_1/Jaspar(0.765)                       | 6.97%        | 2.56%           | <b>4.41%</b>              | 1.00E-12 |       |
|--------------------|-----------------------------------------------------|--------------|-----------------|---------------------------|----------|-------|
|                    | MA0018.2_CREB1/Jaspar(0.932)                        | 6.35%        | 1.99%           | <b>4.36%</b>              | 1.00E-14 |       |
|                    | GFY(?)/Promoter/Homer(0.977)                        | 4.16%        | 0.31%           | <b>3.85%</b>              | 1.00E-30 |       |
|                    | MA0527.1_ZBTB33/Jaspar(0.593)                       | 0.83%        | 0.01%           | <b>0.82%</b>              | 1.00E-13 |       |
| E2F3A non-promoter | PB0203.1_Zfp691_2/Jaspar(0.772)                     | 4.26%        | 0.15%           | <b>4.11%</b>              | 1.00E-12 |       |
| Best Match/Details |                                                     | % of Targets | % of Background | Targets - % of Background | P-value  | Motif |
| E2F3B promoter     | E2F1(E2F)/Hela-E2F1-ChIP-Seq(GSE22478)/Homer(0.950) | 21.93%       | 7.29%           | <b>14.64%</b>             | #####    |       |
|                    | PB0008.1_E2F2_1/Jaspar(0.779)                       | 33.94%       | 23.00%          | <b>10.94%</b>             | 1.00E-47 |       |
|                    | NFY(CCAAT)/Promoter/Homer(0.949)                    | 12.35%       | 3.48%           | <b>8.87%</b>              | #####    |       |
|                    | Elk1(ETS)/Hela-Elk1-ChIP-Seq(GSE31477)/Homer(0.936) | 12.81%       | 6.30%           | <b>6.51%</b>              | 1.00E-43 |       |

**Supplemental Table 5. Motifs identified by HOMER (de novo) from E2F1, E2F3A and E2F3B ChIP-seq**

|                                                         |        |       |               |          |                                                                                       |
|---------------------------------------------------------|--------|-------|---------------|----------|---------------------------------------------------------------------------------------|
| MF0002.1_bZIP_CREB/G-box-like_subclass/Jaspar(0.890)    | 12.06% | 6.11% | <b>5.95%</b>  | 1.00E-38 |    |
| NRF1(NRF)/MCF7-NRF1-ChIP-Seq(Unpublished)/Homer(0.967)  | 6.97%  | 3.06% | <b>3.91%</b>  | 1.00E-30 |    |
| Sp1(Zf)/Promoter/Homer(0.834)                           | 5.93%  | 3.29% | <b>2.64%</b>  | 1.00E-14 |    |
| GFY(?)/Promoter/Homer(0.982)                            | 2.36%  | 0.32% | <b>2.04%</b>  | 1.00E-41 |    |
| Usf2(HLH)/C2C12-Usf2-ChIP-Seq(GSE36030)/Homer(0.784)    | 2.99%  | 1.08% | <b>1.91%</b>  | 1.00E-18 |    |
| GFX(?)/Promoter/Homer(0.951)                            | 1.24%  | 0.25% | <b>0.99%</b>  | 1.00E-16 |    |
| MA0503.1_Nkx2-5_(var.2)/Jaspar(0.647)                   | 0.89%  | 0.14% | <b>0.75%</b>  | 1.00E-14 |    |
| E2F3B non-promoter MA0470.1_E2F4/Jaspar(0.930)          | 16.62% | 5.08% | <b>11.54%</b> | 1.00E-14 |  |
| MA0470.1_E2F4/Jaspar(0.962)                             | 11.71% | 1.71% | <b>10.00%</b> | 1.00E-20 |  |
| Jun-AP1(bZIP)/K562-cJun-ChIP-Seq(GSE31477)/Homer(0.910) | 9.54%  | 1.47% | <b>8.07%</b>  | 1.00E-17 |  |
| AP-1(bZIP)/ThioMac-PU.1-ChIP-Seq(GSE21512)/Homer(0.941) | 8.02%  | 1.43% | <b>6.59%</b>  | 1.00E-12 |  |
| MA0490.1_JUNB/Jaspar(0.960)                             | 6.57%  | 0.76% | <b>5.81%</b>  | 1.00E-14 |  |

## Supplemental Table 6. Liver related IPA functions for E2F1, E2F3A and E2F3B promoter targets

| ChIP-se Category              | B-H p-value | Genes                                                                                                                                                                                                                                                                                                                                                                                                                                                                                                                                                                                                                                                                                                                                                                                                                                                                                                                                                                                                                                                                                                                                                                                                                                                                                                                                                                                                                                                                                                                                                                                                                                                                                                                                                                                                                                                                                                                                                                                                                                                                                                                                                                                                                                                                                                                                                                                                                                                                                                                                                                                                                                                                                                                                                                                                                                                                                                                                                                                                                                                                                                                                                                                                                                                                                                                                                                                                                                                                                                                                                                                                                                                                                                                                                                                                                                                                                                                                                                                                                                                                                                                                                                                                                                                                                                                                                                                                                                                                                                                                                                                                                                    |
|-------------------------------|-------------|------------------------------------------------------------------------------------------------------------------------------------------------------------------------------------------------------------------------------------------------------------------------------------------------------------------------------------------------------------------------------------------------------------------------------------------------------------------------------------------------------------------------------------------------------------------------------------------------------------------------------------------------------------------------------------------------------------------------------------------------------------------------------------------------------------------------------------------------------------------------------------------------------------------------------------------------------------------------------------------------------------------------------------------------------------------------------------------------------------------------------------------------------------------------------------------------------------------------------------------------------------------------------------------------------------------------------------------------------------------------------------------------------------------------------------------------------------------------------------------------------------------------------------------------------------------------------------------------------------------------------------------------------------------------------------------------------------------------------------------------------------------------------------------------------------------------------------------------------------------------------------------------------------------------------------------------------------------------------------------------------------------------------------------------------------------------------------------------------------------------------------------------------------------------------------------------------------------------------------------------------------------------------------------------------------------------------------------------------------------------------------------------------------------------------------------------------------------------------------------------------------------------------------------------------------------------------------------------------------------------------------------------------------------------------------------------------------------------------------------------------------------------------------------------------------------------------------------------------------------------------------------------------------------------------------------------------------------------------------------------------------------------------------------------------------------------------------------------------------------------------------------------------------------------------------------------------------------------------------------------------------------------------------------------------------------------------------------------------------------------------------------------------------------------------------------------------------------------------------------------------------------------------------------------------------------------------------------------------------------------------------------------------------------------------------------------------------------------------------------------------------------------------------------------------------------------------------------------------------------------------------------------------------------------------------------------------------------------------------------------------------------------------------------------------------------------------------------------------------------------------------------------------------------------------------------------------------------------------------------------------------------------------------------------------------------------------------------------------------------------------------------------------------------------------------------------------------------------------------------------------------------------------------------------------------------------------------------------------------------------------------------|
| E2F1 Hepatocellular Carcinoma | 9.60E-03    | NPM1,AXIN1,POLA1,FRMD6,POR,GLB1,ZCCHC8,TSC2,MAP1A,SAFB,HCFC1,ZBTB5,TCF3,RGP1,OGG1,SP4,CNTRL,DAXX,MB21D2,HIST1H2BM,EYA3,ALCAM,ELMO2,ECT2,CCDC138,NDST1,SLC1A5,BAG6,GAK,SMARCA4,FXR2,UGT2A1,TIPARP,KDM6A,PIK3C3,RBMX,VPS13B,C2CD5,ATN1,ZKSCAN5,MTSS1L,SDHA,VPS16,TUBB4B,DHX36,NCBP1,SPSB4,IGF2R,KPNB1,MCM3,BUB1,MTHFD1L,RPL37,TOE1,TFB1M,AP1G1,KANSL2,CDKN2A,KIF23,SOCS3,RAB14,NAV2,MPRIP,YWHAH,PCDH18,TROAP,NUP58,RPGRIP1L,ZC3H14,CTSD,UFSP2,MPHOSPH9,SETD8,COL19A1,STXB1,SMG6,WEE1,ASNA1,DNA2,AURKA,PHRF1,OSBPL8,KIAA0907,BCL2L1,KIAA0895L,H3F3A/H3F3B,ANKRA2,mir-210,POLL,SF3B4,NAGLU,MAST3,ABCD1,HPS5,STK33,KLF10,RAB23,CLUAP1,DDX27,TEX10,IQGAP1,LSM2,TBC1D1,STPG2,WDTG1,FRA10AC1,NDUFV1,TECP R2,IPO4,HERPUD1,STK3,ALS2,UMPS,MTO1,PPM1G,HTATSF1,CENPI,CKS1B,CAMTA1,ING1,ZDHHC6,MCM6,CCP110,MTBP,CEP120,UBR2,TAPT1,mir-148,MDH1,WBSCR17,GKAP1,HOOK3,PRIM2,SPECC1L,SLC39A13,UBXN6,CNOT1,DNAJB12,HIRA,TIMM17B,MON1A,MBD2,MON2,AP5Z1,MED12,MEX3A,RNF168,SUCO,AAAS,GAMT,EML5,MYO9A,NCLN,RTN4,DNAJC14,ARHGAP35,TMEM50B,NEK2,CANT1,IPO8,SNAI2,CEP78,NCAPD3,SLC4A1AP,GPX1,TRIO,NRF1,AAMP,P,PITRM1,KANSL3,CORO2B,ATAD5,TYW1,NEIL3,ZBTB3,HK2,RINT1,TICRR,CETN3,RAB33B,CC2D1A,CREB1,RFC2,NUP205,TXNL1,VCL,TCTN3,ZNF25,RGMB,NAP1L4,MCMBP,CEP164,NUP85,CEP152,PDE4DIP,BANP,C2orf44,TIAL1,PLCG1,PLK1,MDM2,CNKSR3,F3,SCAF11,C1orf159,RHOBTB1,NCAPG2,ZNF519,RRM1,GLTP,ZNF546,ATL2,MMS19,DUS3L,CEP192,EML6,WDR25,RBBP6,ZFYVE19,NCAM1,FMNL3,PFN1,FARP1,ARF1,CNNM2,UNC5B,FBXW7,RELL1,FAM208A,KHNYN,TMEM230,FASN,HEXDC,RPRD2,HIST1H3F,C7orf50,P4HB,GJA1,STIL,DCTN4,TRIOBP,USP38,MTA2,BIRC6,ATP10A,MUT,MAPK8IP3,HERC2,NIN,NASP,WHSC1L1,BRAT1,HNRNPUL2,C15orf41,TSNAXIP1,SBNO2,KBTBD8,UVRAG,CDK2,FADS1,KDM3A,BRD2,PA2G4,MRPS30,KIAA0825,ZMIZ1,TRIM24,GTF2B,IFRD1,IP O5,YLPM1,RASSF1,NRAS,TRA2B,COTL1,PANK2,DOCK7,TCF7L1,C19orf68,ZNF382,PIAS3,FAF1,TMEM2,PTPRU,U2SURP,HIVEP1,ZDHHC12,MTRF1L,CBFA2T2,CASP8AP2,C17orf80,MYH10,PRR12,DSN1,PCIF1,FAM208B,CABIN1,ADH5,PAN2,SNRNP48,RCL1,MGAT1,RNGTT,IQGAP3,TP53,ATP5J,TYMS,GNE,ASF1B,ESPL1,PAPD4,APPL2,BLVRA,RRM2,ANO6,SMG5,MDM1,MYO1C,KLF13,TBC1D14,SKP2,HSPA8,FBXW8,ATE1,MORC2,PPOX,TMEM55A,ST3GAL1,MIDN,GTSE1,ANAPC5,PCYOX1L,LTN1,PARD3,NUP188,FKBP2,FBXO10,HNRNPA2B1,ODF2L,CDK4,THOC3,MKRN2,DNAJC13,PRPF4,KIAA0754,RNF130,GAS2L3,LRRFIP1,SLC35B2,THUMPD2,MMS22L,LBR,CDKN3,TMEM209,OGT,TMEM260,TRIM27,FAM227A,ALG8,BTAF1,ZBTB45,NFE2L2,DIS3,RAD21,CCDC57,PRKDC,N4BP2L2,MAPRE1,GNA12,CDH6,LARP4B,MLF1,NCAPD2,SLC29A1,RUBCN,DDX39B,RIC8B,ABCF2,DOPEY2,MBD3,EIF4A1,CDKN1A,VMP1,ZCWPW1,SPICE1,CEP112,PPIL1,W RAP53,FOXRED1,ILF3,MAP3K11,MEGF9,MSH3,GNB2L1,TSFM,AP2A2,KIF16B,NSUN6,MYC,TGFB2,LEMD3,TNRC6C,AHDC1,PHF20,PACS2,FAM83B,CACTIN,CHTF18,E4F1,PPP1R15B,CLASP1,EIF4B,TXNDC16,HUWE1,NBEAL2,USP28,TEX264,SYNE2,MYEF2,KANK2,KIF4A,ORC6,ENKD1,BRD8,TUSC3,BUB1B,ATAD2,KMT2A,CBLB,PIAS4,TAF1,HNRNPAB,UGP2,MLXIP,XRCC6,SEPT10,SMCHD1,LMNB2,HSP90AA1,MAD1L1,NCKAP5L,FAM83D,PTPN21,RBBP4,B2M,DCBLD2,UBXN1,NMT1,ARID1A,QRICH1,SEC31A,TBC1D8B,UBE2N,FASTKD3,NEURL4,C14orf80,HNRNPK,RAD50,IGF2BP1,MIER1,CDC25B,CCNA2,SHC1,SP3,FANCD2,WD FY3,NET1,DNAJC4,NOP58,CABLES2,ENPP4,MEX3B,MCM9,VAR5,LONP1,ARC,POMT2,RFX1,HAUS8,NOP56,AP1S2,XRN2,RALY,CHERP,NMT2,MTHFD1,NFKBIL1,FOXMI1,GAN,ATL3,PSME3,HNRNPM,NBN,FAM98B,PSKH1,WDR54,RIOK2,KIF5B,PHF19,ZNF622,EHD4,SMG7,THAP4,MSH6,WNK1,GZF1,FANCI,CENPF,MZF1,GTF3C2,ARV1,GOLIM4,SFPQ,ZNF451,RICTOR,RUSC1,NCOA7,INTS7,MXD3,TTF2,THRAP3,HNRNPUL1,IRS2,OSMR,CEP250,PITPNB,TIMP2,PAPOLA,UPF2,MEX3C,TMEM55B,TOBP1,COPS5,NUFIP1,SERINC1,FANCC,UBE2S,WDR89,FNBP4,CTPS1,UBQLN4,PLA2G6,NSMCE2,NR1D1,BSG,ZNF202,YARS,E2F1,FBXL6,AHCTF1,RGL2,LRP8,HELB,CYR61,L3MBTL2,CD2BP2,VASH2,ADAM17,FN1,SUV39H2,ALKBH7,CTNNA3,NUP214,RTKN2,TRIB1,YY1,MTOR,POLR2M,PTS,DGCR8,TOP2A,DAP3,EIF3A,E2F5,MCPH1,CFAP77,KIAA0391,PCBP2,SARS,KHSRP,RXR, POT1,FAM109A,NUP35,AIFM1,SAMD14,FMN1,DCK,CCDC130,ACTB,CENPU,ICAM4,RQCD1,ATXN2L,PCDH9,SIN3A,RAD54B,KIF15,SF3B2,mir-30,RBM6,KIF20B,DENND1A,CENPA,RBPJ,ZFP36L2,USP49,MBD5,ZMYM4,BIRC2,FZR1,SND1,ERCC6,TFG,INSIG1,DIAPH3,MMP16,NR2F2,CDH24,FNIP2,AURKB,UBA2,CCNL1,ROCK2,SRSF1,CPSF6,DPY19L4,SPATA5,NCOA5,POLD3,PMS1,EZH2,PRND,HTRA2,NIPBL,PUF60,BRCA1,RAD51C,ARHGAP24,MRPL43,FARP2,KIF14,RBL2,PDE10A,STK11,ZC3H6,TBP,CTT6A,MARS,TPX2,EPRS,DPP9,GSR,SEL1L,CASC5,ARRB2,TOB2,ZFR,CASP2,PTPRS,GNL3,LTV1,BAZ1B,AK2,PFAS,RFC3,OBFC1,ZBTB7A,TNRC6B,MED23,NFIX,CHD4,GTF3C5,PKM,CUTA,SLC7A1,RAPGEF6,POLI,SIL1,DARS2,STXB4,GANAB,BCAR1,CENPP,LCA5,NKD2,NFX1,NLK,PCK2,SP1,ADAL,CIT,OXCT1,LTBP4,ZNHIT2,ARSB,BLM,STK40,ACTN1,E2F8,IDH3B,TM9SF1,NACA,BICD2,DCTPP1,MDGA1,FCHSD2,MAPK9,RPS6KA5,USP1,PSMA1,GCC2,HIVEP2,AFF1,ZBTB48,KIF24,PPP6R1,LPAR1,PAQR4,CAD,HMGR,RTN3,MCM7 |

## Supplemental Table 6. Liver related IPA functions for E2F1, E2F3A and E2F3B promoter targets

| ChIP-se Category                          | B-H p-value | Genes                                                                                                                                                                                                                                                                                                                                                                                                                                                                                                                                                                                                                                                                                                                                                                                                                                                                                                                                                                                                                                                                                                                                                                                                                                                                                                                                                                                                                                                                                                                                                                                                                                                                                                                                                                                                                                                                                                                                                                                                                                                                                                                                                                                                                                                                                                                                                                                                                                                                                                                                                                                                                                                                                                                                                                                                                                                                                                                                                                                                                                                                                                                                                                                                                                                                                                                                                                                                                                                                                                                                                                                                                                                                                                                                                                                                                                                                                                                                                                                                                                                                                                                                                                                                                                                                                                                                                                                                                                                                                                                                                                                                                                                                                                                                                                    |
|-------------------------------------------|-------------|--------------------------------------------------------------------------------------------------------------------------------------------------------------------------------------------------------------------------------------------------------------------------------------------------------------------------------------------------------------------------------------------------------------------------------------------------------------------------------------------------------------------------------------------------------------------------------------------------------------------------------------------------------------------------------------------------------------------------------------------------------------------------------------------------------------------------------------------------------------------------------------------------------------------------------------------------------------------------------------------------------------------------------------------------------------------------------------------------------------------------------------------------------------------------------------------------------------------------------------------------------------------------------------------------------------------------------------------------------------------------------------------------------------------------------------------------------------------------------------------------------------------------------------------------------------------------------------------------------------------------------------------------------------------------------------------------------------------------------------------------------------------------------------------------------------------------------------------------------------------------------------------------------------------------------------------------------------------------------------------------------------------------------------------------------------------------------------------------------------------------------------------------------------------------------------------------------------------------------------------------------------------------------------------------------------------------------------------------------------------------------------------------------------------------------------------------------------------------------------------------------------------------------------------------------------------------------------------------------------------------------------------------------------------------------------------------------------------------------------------------------------------------------------------------------------------------------------------------------------------------------------------------------------------------------------------------------------------------------------------------------------------------------------------------------------------------------------------------------------------------------------------------------------------------------------------------------------------------------------------------------------------------------------------------------------------------------------------------------------------------------------------------------------------------------------------------------------------------------------------------------------------------------------------------------------------------------------------------------------------------------------------------------------------------------------------------------------------------------------------------------------------------------------------------------------------------------------------------------------------------------------------------------------------------------------------------------------------------------------------------------------------------------------------------------------------------------------------------------------------------------------------------------------------------------------------------------------------------------------------------------------------------------------------------------------------------------------------------------------------------------------------------------------------------------------------------------------------------------------------------------------------------------------------------------------------------------------------------------------------------------------------------------------------------------------------------------------------------------------------------------------------------|
| E2F1 Liver Hyperplasia/Hyperproliferation | 9.60E-03    | NPM1,AXIN1,POLA1,FRMD6,POR,GLB1,TSC2,ZCCHC8,MAP1A,SAFB,HCFC1,ZBTB5,TCF3,RGP1,OGG1,SP4,DAXX,CNTRL,MB21D2,HIST1H2BM,EYA3,ALCAM,ELMO2,CCDC138,ECT2,NDST1,SLC1A5,mir-331,BAG6,GAK,SMARCA4,FXR2,TIPARP,UGT2A1,KDM6A,PNRC1,RBMX,PIK3C3,VPS13B,C2CD5,ATN1,ZKSCAN5,MTSS1L,SDHA,VPS16,TUBB4B,DHX36,NCBP1,SPSB4,IGF2R,KPNB1,MCM3,BUB1,MTHFD1L,MSH2,RPL37,TOE1,TFB1M,AP1G1,KANSL2,KIF23,CDKN2A,SOCS3,RAB14,NAV2,MPRIP,YWHAH,PCDH18,TROAP,NUP58,RPGRIP1L,ZC3H14,CTSD,UFSP2,MPHOSPH9,SEC63,SETD8,COL19A1,STXBP1,SMG6,WEE1,ASNA1,DNA2,AURKA,PHRF1,OSBPL8,KIAA0907,BCL2L1,H3F3A/H3F3B,KIAA0895L,ANKRA2,mir-210,POLL,SF3B4,NAGLU,MAST3,ABCD1,HPS5,STK33,KLF10,RAB23,CLUAP1,DDX27,IQGAP1,TEX10,LSM2,TBC1D1,STPG2,WDTCT1,FRA10AC1,NDUFV1,TECP R2,IPO4,HERPUD1,STK3,ALS2,UMPS,BIRC5,MTO1,PPM1G,HTATSF1,CENPI,CKS1B,CAMTA1,ING1,ZDHH6,MCM6,CCP110,MTBP,CEP120,UBR2,TAPT1,RAN,mir-148,MDH1,WBSCR17,GKAP1,HOOK3,PRIM2,SPECC1L,SLC39A13,UBXN6,CNOT1,DNAJB2,HIRA,TIMM17B,MON1A,MBD2,MON2,AP5Z1,MED12,MEX3A,RNF168,SUCO,AAAS,GAMT,EML5,MYO9A,NCLN,RTN4,DNAJC14,ARHGAP35,TMEM50B,NEK2,CANT1,IPO8,SNAI2,CEP78,NCAPD3,SLC4A1AP,GPX1,TRIO,NRF1,AAMP,PITRM1,KANSL3,CORO2B,TYW1,ATAD5,ZBTB3,NEIL3,HK2,RINT1,TICRR,CETN3,CC2D1A,RAB33B,CREB1,RFC2,NUP205,TXNL1,VCL,TCTN3,ZNF25,RGMB,NAP1L4,MCMBP,CEP164,NUP85,CEP152,PDE4DIP,BANP,TRIM28,C2orf44,TIAL1,PLCG1,PLK1,MDM2,CNKSR3,F3,SCAF11,C1orf159,RHOBTB1,NCAPG2,ZNF519,RRM1,GLTP,ZNF546,ATL2,MMS19,DUS3L,CEP192,EML6,WDR25,RBBP6,ZFYVE19,NCAM1,FMNL3,PFN1,FARP1,ARF1,CNNM2,UNC5B,FBXW7,RELL1,FAM208A,KHNYN,TMEM230,STAG1,FASN,HEXDC,RPRD2,HIST1H3F,C7orf50,P4HB,GJA1,STIL,DCTN4,TRIOBP,USP38,MTA2,BIRC6,ATP10A,MUT,MAPK8IP3,HERC2,NIN,NASP,WHSC1L1,BRAT1,HNRNPUL2,C15orf41,TSNAXIP1,SBNO2,KBTD8,UVRAG,CDK2,FADS1,KDM3A,BRD2,PA2G4,MRPS30,MRE11A,KIAA0825,ZMIZ1,TRIM24,GTF2B,PHGDH,IFRD1,IPO5,YLPM1,RASSF1,NRAS,TRA2B,COTL1,PANK2,DOCK7,TCF7L1,C19orf68,ZNF382,PIAS3,FAF1,RPS4Y1,TMEM2,PTPRU,U2SURP,HIVEP1,ZDHH12,MTRF1L,CBFA2T2,CASP8AP2,C17orf80,MYH10,PRR12,DSN1,PCIF1,FAM208B,ODC1,CABIN1,ADH5,PAN2,SNRNP48,RCL1,MGAT1,RNGTT,IQGAP3,TP53,ATP5J,TYMS,GNE,ASF1B,ESPL1,PAPD4,APPL2,BLVRA,RRM2,ANO6,SMG5,MDM1,MYO1C,KLF13,TBC1D14,SKP2,HSPA8,FBXW8,ATE1,MO RC2,PPOX,TMEM55A,ST3GAL1,MIDN,GTSE1,ANAPC5,PCYOX1L,LTN1,PARD3,NUP188,FKBP2,FANCM,FBXO10,HNRNPA2B1,ODF2L,CDK4,THOC3,MKRN2,DNAJC13,PRPF4,KIAA0754,RNF130,GAS2L3,LRRFIP1,SLC35B2,THUMP2,MMS22L,LBR,CDKN3,TMEM209,OGT,TMEM260,TRIM27,FAM227A,ALG8,BTAF1,ZBTB45,NFE2L2,DIS3,RAD21,CCDC57,PRKDC,N4BP2L2,MAPRE1,GNA12,POLG,CDH6,MLF1,LARP4B,NCAPD2,SLC29A1,RUBCN,CCNE1,DDX39B,ABCF2,RIC8B,EIF4A1,CDKN1A,MBD3,DOPEY2,ZCWPW1,VMP1,SPICE1,CEP112,PPIL1,WRAP53,FOXRED1,ILF3,MAP3K11,MEGF9,MSH3,GNB2L1,TSFM,AP2A2,KIF16B,NSUN6,MYC,TGFB2,LEMD3,TNRC6C,AHDC1,PHF20,PACS2,FAM83B,CACTIN,CHTF18,E4F1,PPP1R15B,CLASP1,EIF4B,TXNDC16,HUWE1,NBEAL2,USP28,TEX264,SYNE2,MYEF2,KANK2,KIF4A,ORC6,ENKD1,BUB1B,BRD8,TUSC3,ATAD2,KMT2A,CBLB,HNRNPAB,PIAS4,TAI1,UGP2,MLXIP,XRCC6,SEPT10,SMCHD1,MAD1L1,L MNB2,HSP90AA1,NCKAP5L,FAM83D,PTPN21,RBBP4,B2M,DCBLD2,UBXN1,NMT1,ARID1A,QRICH1,SEC31A,TBC1D8B,UBE2N,FASTKD3,NEURL4,C14orf80,HNRNPK,RAD50,IGF2BP1,MIER1,CDC25B,CCNA2,SHC1,SP3,FANCD2,WDFY3,NET1,DNAJC4,NOP58,CABLES2,ENPP4,MEX3B,MCM9,VARS,LONP1,ARC,POMT2,RFX1,HAUS8,NOP56,AP1S2,XRN2,RALY,CHERP,NMT2,MTHFD1,NFKBIL1,FOXM1,GAN,ATL3,PSME3,NBN,HNRNPM,FAM98B,PSKH1,MAPK14,WDR54,RIOK2,KIF5B,PHF19,ZNF622,EHD4,SMG7,THAP4,MSH6,WNK1,GZF1,FANCI,CENPF,MZF1,GTF3C2,ARV1,GOLIM4,SFPQ,ZNF451,RICTOR,RUSC1,NCOA7,INTS7,MXD3,TTF2,THRAP3,HNRNPUL1,IRS2,OSMR,CEP250,PITPNB,TIMP2,PAPOLA,UFP2,NDRG1,MEX3C,TMEM55B,TOBP1,COPS5,NUFIP1,SERINC1,FANCC,UBE2S,WDR89,FNBP4,CTPS1,UBQLN4,PLA2G6,NSMCE2,NR1D1,BSG,ZNF202,YARS,E2F1,FBXL6,AHCTF1,RGL2,LRP8,HELB,CYR61,L3MBTL2,CD2BP2,VASH2,ADAM17,FN1,SUV39H2,ALKBH7,CTNNA3,NUP214,RTKN2,TRIB1,YY1,MTOR,POLR2M,PTS,DGCR8,CEBPA,TOP2A,DAP3,EIF3A,E2F5,MCPH1,CFAP77,KIAA0391,PCBP2,SARS,KHSRP,RXR,B,POT1,FAM109A,NUP35,AIFM1,SAMD14,FMN1,LETM1,DCK,CCDC130,ACTB,CENPU,ICAM4,RQCD1,ATXN2L,PCDH9,SIN3A,KITLG,RAD54B,KIF15,SF3B2,mir-30,RBM6,KIF20B,DENND1A,CENPA,RBPJ,ZFP36L2,USP49,MBD5,BIRC2,ZMYM4,FZD7,FZR1,SND1,ERCC6,TFG,INSIG1,DIAPH3,MMP16,NR2F2,CDH24,FNIP2,AURKB,UBA2,CCNL1,FGFR3,ROCK2,NCOA5,SRSF1,CPSF6,DPY19L4,SPATA5,POLD3,PMS1,EZH2,PRND,HTRA2,NIPBL,PUF60,BRCA1,RAD51C,ARHGAP24,MRPL43,FARP2,KIF14,RBL2,PDE10A,STK11,ZC3H6,TBP,CCT6A,MARS,TPX2,EPRS,DPP9,GSR,SEL1L,CASC5,ARRB2,TOB2,ZFR,CASP2,PTPRS,GNL3,LTV1,BAZ1B,AK2,PFAS,RFC3,OBFC1,ZBTB7A,TNRC6B,MED23,NFIX,CHD4,GTF3C5,PKM,CUTA,SLC7A1,RAPGEF6,POLI,SIL1,DARS2,STXBP4,GANAB,BCAR1,CENPP,LC A5,NKD2,NFX1,NLK,PCK2,SP1,ADAL,CIT,OXCT1,LTBP4,ZNHIT2,ARSB,BLM,STK40,ACTN1,E2F8,IDH3B,TM9SF1,NACA,BICD2,DCTPP1,MDGA1,MAPK9,FCHSD2,RPS6KA5,USP1,PSMA1,GCC2,HIVEP2,AFF1,ZBTB48,KIF24,PPP6R1,LPAR1,PAQR4,CAD,HMGC,RTN3,MCM7 |
| E2F1 Liver Proliferation                  | 2.25E-01    | SOCS3,MAPK1,ODC1,MYC,TGFB2,NCOA5,TRIM24,CIT,SMARCB1,CEBPA,ATF4,JUND,OSMR,DLC1,NFE2L2,TIMP2,TP53,SLC20A1,S1PR2,BIRC6,MAPK9,STK3,FOXM1,SKP2,FADD,KITLG,CCNE1,MAPK14,E2F1,CDKN1A,CDK2,LGALS1                                                                                                                                                                                                                                                                                                                                                                                                                                                                                                                                                                                                                                                                                                                                                                                                                                                                                                                                                                                                                                                                                                                                                                                                                                                                                                                                                                                                                                                                                                                                                                                                                                                                                                                                                                                                                                                                                                                                                                                                                                                                                                                                                                                                                                                                                                                                                                                                                                                                                                                                                                                                                                                                                                                                                                                                                                                                                                                                                                                                                                                                                                                                                                                                                                                                                                                                                                                                                                                                                                                                                                                                                                                                                                                                                                                                                                                                                                                                                                                                                                                                                                                                                                                                                                                                                                                                                                                                                                                                                                                                                                                |
| E2F1 Liver Hypoplasia                     | 2.43E-01    | SLC20A1,TACC3,ARF6,TCEA1,LHX2,TSC2,CDK4,ATF4,CDK2,ARID3A                                                                                                                                                                                                                                                                                                                                                                                                                                                                                                                                                                                                                                                                                                                                                                                                                                                                                                                                                                                                                                                                                                                                                                                                                                                                                                                                                                                                                                                                                                                                                                                                                                                                                                                                                                                                                                                                                                                                                                                                                                                                                                                                                                                                                                                                                                                                                                                                                                                                                                                                                                                                                                                                                                                                                                                                                                                                                                                                                                                                                                                                                                                                                                                                                                                                                                                                                                                                                                                                                                                                                                                                                                                                                                                                                                                                                                                                                                                                                                                                                                                                                                                                                                                                                                                                                                                                                                                                                                                                                                                                                                                                                                                                                                                 |

## Supplemental Table 6. Liver related IPA functions for E2F1, E2F3A and E2F3B promoter targets

| ChIP-se Category                             | B-H p-value | Genes                                                                                                                                                                                                         |
|----------------------------------------------|-------------|---------------------------------------------------------------------------------------------------------------------------------------------------------------------------------------------------------------|
| E2F1 Liver Necrosis/Cell Death               | 3.29E-01    | SOCS3,GADD45B,ATF7,TMBIM6,MYC,STK4,SHC1,NCOA5,MTOR,ARF6,TRIM27,MTF1,CIT,JUND,NFE2L2,TP53,SLC20A1,PAFAH2,CASP3,MAPK9,PLK1,STK3,F3,XIAP,BUB1,FADD,DAXX,BCL2L1,MAPK14,E2F1,CDKN1A,SLC25A5,CASP7,BIRC2            |
| E2F1 Glutathione Depletion In Liver          | 3.59E-01    | GPX1                                                                                                                                                                                                          |
| E2F1 Liver Cirrhosis                         | 3.59E-01    | TP53,B2M,ADAM17,FN1,PDE10A,TBC1D9,TXLNA,TUBB,HNRNP,K,LBR,FGFR3,mir-30,BSG,VKORC1,mir-210,ADK,FBLN1, TOP2A,HMGCR,NFE2L2,RASSF1,WNT5A                                                                           |
| E2F1 Liver Damage                            | 3.59E-01    | POLA1,TNFAIP3,TGFBR2,POR,MTOR,TIPARP,STUB1,PPP3R1,ADK,JUND,ARHGAP24,NFE2L2,RASSF1,TP53,PAFAH2,MAPK9,POLD1,CBLB,BCL2L1,mir-30,PPOX,MAPK14,BSG,DUSP1,mir-210,CDKN1A,HPRT1,HMGCR                                 |
| E2F1 Liver Hematopoiesis                     | 4.02E-01    | SOCS3,CBFB,FEN1,TMOD3                                                                                                                                                                                         |
| E2F1 Liver Inflammation/Hepatitis            | 4.02E-01    | POLA1,PPIA,TNFAIP3,POR,NCOA5,MTOR,WRN,STUB1,PPP3R1,ADK,CEBPA,NFE2L2,RASSF1,TP53,CASP3,MTA2,MAPK9,FANCC,POLD1,XIAP,BCL2L1,mir-30,mir-210,HPRT1,NAGLU,CYR61,HMGCR,CASP7,BIRC2                                   |
| E2F1 Biliary Hyperplasia                     | 4.74E-01    | MYC                                                                                                                                                                                                           |
| E2F1 Liver Congestion                        | 4.74E-01    | HEY2                                                                                                                                                                                                          |
| E2F1 Liver Degeneration                      | 4.74E-01    | XRCC5                                                                                                                                                                                                         |
| E2F1 Liver Failure                           | 4.74E-01    | TP53,ADAM17,DUSP1, TOP2A,CEBPA,MARS                                                                                                                                                                           |
| E2F1 Hepatocellular Peroxisome Proliferation | 4.74E-01    | ABCD1,PEX3,PEX11B                                                                                                                                                                                             |
| E2F1 Liver Fibrosis                          | 5.01E-01    | TP53,MYH10,SOCS3,FN1,S1PR2,MAPK1,LHX2,POLA1,GNB2L1,BAMBI,RPGRIP1L,POLD1,HDGF,TGFBR2,NCOA5,MAPK14,SP1,ADK,CEBPA,NAGLU,NFE2L2,WNT5A,TIMP2,LGALS1                                                                |
| E2F1 Liver Cholestasis                       | 5.57E-01    | GJA1,NFE2L2                                                                                                                                                                                                   |
| E2F1 Liver Dysfunction                       | 6.37E-01    | FDFT1                                                                                                                                                                                                         |
| E2F1 Liver Steatosis                         | 6.37E-01    | KDM3A,ERCC6,INSIG1,POLA1,GNA11,BAG3,FBXW7,POU3F2,RBL1,POR,ID1,NCOA5,MAN2C1,TIPARP,FASN,ADK,FAM73B,ATF4,OSMR,IRS2,KLF2,TP53,MAF1,GPS2,ACOT13,ANGPTL6,MUT,FANCC,POLD1,PSME3,PANK1,DUSP1,CDKN1A,RBPJ,HMGCR,NPHP3 |
| E2F1 Liver Dysplasia                         | 7.50E-01    | E2F1                                                                                                                                                                                                          |

## Supplemental Table 6. Liver related IPA functions for E2F1, E2F3A and E2F3B promoter targets

| ChIP-se Category                | B-H p-value | Genes                                                                                                                                                                                                                                                                                                                                                                                                                                                                                                                                                                                                                                                                                                                                                                                                                                                                                                                                                                                                                                                                                                                                                                                                                                                                                                                                                                                                                                                                                                                                                                                                                                                                                                                                                                                                                                                            |
|---------------------------------|-------------|------------------------------------------------------------------------------------------------------------------------------------------------------------------------------------------------------------------------------------------------------------------------------------------------------------------------------------------------------------------------------------------------------------------------------------------------------------------------------------------------------------------------------------------------------------------------------------------------------------------------------------------------------------------------------------------------------------------------------------------------------------------------------------------------------------------------------------------------------------------------------------------------------------------------------------------------------------------------------------------------------------------------------------------------------------------------------------------------------------------------------------------------------------------------------------------------------------------------------------------------------------------------------------------------------------------------------------------------------------------------------------------------------------------------------------------------------------------------------------------------------------------------------------------------------------------------------------------------------------------------------------------------------------------------------------------------------------------------------------------------------------------------------------------------------------------------------------------------------------------|
| E2F1 Liver Enlargement          | 1.00E+00    | FDFT1,STK11,FADS2,STK3,IGF2R,WNT5A                                                                                                                                                                                                                                                                                                                                                                                                                                                                                                                                                                                                                                                                                                                                                                                                                                                                                                                                                                                                                                                                                                                                                                                                                                                                                                                                                                                                                                                                                                                                                                                                                                                                                                                                                                                                                               |
| E2F1 Liver Hepatomegaly         | 1.00E+00    | FDFT1,STK11,FADS2,STK3,IGF2R,WNT5A                                                                                                                                                                                                                                                                                                                                                                                                                                                                                                                                                                                                                                                                                                                                                                                                                                                                                                                                                                                                                                                                                                                                                                                                                                                                                                                                                                                                                                                                                                                                                                                                                                                                                                                                                                                                                               |
| E2F3A Liver Hypoplasia          | 2.44E-02    | SLC20A1,RAF1,TACC3,CDK4,KRAS,MAFF,CDK2,ARID3A                                                                                                                                                                                                                                                                                                                                                                                                                                                                                                                                                                                                                                                                                                                                                                                                                                                                                                                                                                                                                                                                                                                                                                                                                                                                                                                                                                                                                                                                                                                                                                                                                                                                                                                                                                                                                    |
| E2F3A Liver Necrosis/Cell Death | 6.53E-02    | SLC20A1,TP53,RAF1,GADD45B,FKBP1A,FADD,MYC,TRADD,MAPK14,TRIM27,E2F1,CDKN1A,TLR7                                                                                                                                                                                                                                                                                                                                                                                                                                                                                                                                                                                                                                                                                                                                                                                                                                                                                                                                                                                                                                                                                                                                                                                                                                                                                                                                                                                                                                                                                                                                                                                                                                                                                                                                                                                   |
| E2F3A Hepatocellular Carcinoma  | 9.79E-02    | RAF1,PRKAB2,POLA1,KRAS,IFT80,SKAP2,RCL1,MAP1A,IQGAP3,TYMS,TP53,HCFC1,PAPD4,NPAT,GRM8,UPF3B,RRM2,MDM1,SPATA20,SKP2,SP4,ATE1,HSPA8,CNTRL,GTSE1,PDS5A,ANAPC5,LTN1,ELMO2,CCDC138,TRAPPC5,FKBP2,HNRNPA2B1,CDK4,MMS22L,TMEM209,TRIM27,SSTR5,IBTK,TLR7,ALG8,DIS3,RAD21,MTMR3,DROSHA,LARP4B,ING5,SLC29A1,ID3,RUBCN,KPNB1,MCM3,MTHFD1L,DDX39B,ABCF2,RIC8B,CDKN1A,ZCWPW1,PSAP,PPIL1,TFB1M,WRAP53,EF1A1,NAV2,MEGF9,NUP58,TFSM,RPGRIP1L,PIEZO1,KIF16B,MYC,UFS2,SMPD4,PHF20,GATC,CACTIN,C17orf53,EIF4B,OSBPL1A,USP28,C3orf58,WEE1,ORC6,ENKD1,ATAD2,OSBPL8,MEF2B,UGP2,XRCC6,SEPT10,SMCHD1,NAGLU,CBX3,RBBP4,ARID1A,VPS72,RAB23,KLF10,DDX27,C14orf80,CSRP2BP,LYST,NOP58,C16orf59,MCM9,VARS,LRRC8A,VAV2,POMT2,HAUS8,ZNF280D,NOP56,CHERP,Scd2,HERPUD1,SNX27,MTHFD1,UMPS,GAN,ATL3,TPP2,PPM1G,NBN,CENPI,VAV3,EHD4,MSH6,ZDHHC6,RER1,MCM6,CCP110,MTBP,UBR2,ZNF628,mir-148,SFPQ,MKI67,RICTOR,RNF38,INTS7,MXD3,RARA,ABCC1,HNRNPUL1,PLCB1,IRS2,CEP250,PITPNB,CNOT1,TOPBP1,NUFIP1,PLEC,MDC1,ITPR1,WDR89,AP5Z1,UBQLN4,MIS18BP1,RNF168,NSMCE2,AAAS,AHI1,E2F1,ACY1,NCLN,DNAJC14,KIAA0368,TBC1D15,CLCC1,L3MBTL2,CD2BP2,SNAI2,MGME1,FKBP1A,ATAD5,XLYB,TRIB1,NEIL3,POLR2M,TCOF1,DGCR8,RAB33B, TOP2A,RFC2, TXNL1,PCBP2,KHSRP,MCMBP,NUP85,CEP152,mir-199,AP4M1,DCK,SEC24B,ACTB,PAICS,RQCD1,IQSEC2,ATXN2L,NCAPG2,RRM1,GLTP,RAD54B,FTL,KIF15,ATL2,RBM6,REV1,MMS19,DENND1A,DUS3L,SEC62,ZFP36L2,COBLL1,NCAM1,OSGEPL1,FMNL3,PFN1,LAMTOR2,MMP16,MAP1B,ZNF609,ZNF91,UBA2,RELL1,CCNL1,FAM208A,USF3,ATG4C,ARHGEF40,SRSF1,POLD3,PTRH2,EZH2,RYR3,CDCA3,BRCA1,RAD51C,C7orf50,P4HB,ZNF212,ZC3H6,BIRC6,MED14,ARRB2,CASP2,MBTSP1,NUAK1,BAZ1B,CDK2,TEX261,RFC3,KDM3A,TEAD4,BRD2,MED23,PA2G4,GTF3C5,PKM,WDHD1,CENPP,ZMIZ1,MCM4,NFX1,PCK2,RRN3,ARSB,IPO5,TM9SF1,E2F8,RASSF1,MAP2K7,MTRR,TRA2B,PANK2,COTL1,let-7,GABBR1,FCHSD2,ERBB3,USP1,PSMA1,HIVEP2,AFF1,C19orf68,ZNF382,CIART,KIF24,U2SURP,SPR,CAD,TONSL,CASP8AP2 |

## Supplemental Table 6. Liver related IPA functions for E2F1, E2F3A and E2F3B promoter targets

| ChIP-se Category                           | B-H p-value | Genes                                                                                                                                                                                                                                                                                                                                                                                                                                                                                                                                                                                                                                                                                                                                                                                                                                                                                                                                                                                                                                                                                                                                                                                                                                                                                                                                                                                                                                                                                                                                                                                                                                                                                                                                                                                                                                                                                                             |
|--------------------------------------------|-------------|-------------------------------------------------------------------------------------------------------------------------------------------------------------------------------------------------------------------------------------------------------------------------------------------------------------------------------------------------------------------------------------------------------------------------------------------------------------------------------------------------------------------------------------------------------------------------------------------------------------------------------------------------------------------------------------------------------------------------------------------------------------------------------------------------------------------------------------------------------------------------------------------------------------------------------------------------------------------------------------------------------------------------------------------------------------------------------------------------------------------------------------------------------------------------------------------------------------------------------------------------------------------------------------------------------------------------------------------------------------------------------------------------------------------------------------------------------------------------------------------------------------------------------------------------------------------------------------------------------------------------------------------------------------------------------------------------------------------------------------------------------------------------------------------------------------------------------------------------------------------------------------------------------------------|
| E2F3A Liver Hyperplasia/Hyperproliferation | 9.79E-02    | RAF1,PRKAB2,POLA1,KRAS,IFT80,SKAP2,RCL1,MAP1A,IQGAP3,TYMS,TP53,HCFC1,PAPD4,SLC2A1,NPAT,GRM8,UPF3B,RRM2,MDM1,SKP2,SPATA20,SP4,ATE1,HSPA8,CNTRL,GTSE1,PDS5A,ANAPC5,LTN1,ELMO2,CCDC138,TRAPPC5,FKBP2,HNRNPA2B1,CDK4,MMS22L,TMEM209,TRIM27,SSTR5,IBTK,TLR7,ALG8,DIS3,RAD21,MTMR3,DROSHA,POLG,LARP4B,ING5,SLC29A1,ID3,RUBCN,KPNB1,MCM3,CCNE1,MTHFD1L,DDX39B,MSH2,ABCF2,RIC8B,CDKN1A,ZCWPW1,PSAP,PPIL1,TFB1M,WRAP53,EEF1A1,NAV2,MEGF9,NUP58,TSFM,RPGRIP1L,PIEZO1,KIF16B,MYC,UFGSP2,SMPD4,PHF20,GATC,CACTIN,C17orf53,EIF4B,OSBP,L1A,USP28,C3orf58,WEE1,ORC6,ENKD1,ATAD2,OSBPL8,MEF2B,UGP2,XRCC6,SEPT10,SMCHD1,NAGLU,CBX3,RBBP4,ARID1A,VPS72,RAB23,KLF10,DDX27,C14orf80,CSRP2BP,LYST,NOP58,C16orf59,MCM9,VARS,LRRRC8A,VAV2,POMT2,HAUS8,ZNF280D,NOP56,CHERP,Scd2,HERPUD1,SNX27,MTHFD1,UMPS,BIRC5,GAN,ATL3,TPP2,PPM1G,NBN,MAPK14,CENPI,VAV3,EHD4,MSH6,ZDHHC6,RER1,MCM6,CCP110,MTBP,UBR2,ZNF628,RAN,mir-148,SFPQ,MKI67,RICTOR,RNF38,INTS7,MXD3,RARA,ABCC1,HNRNPUL1,PLCB1,IRS2,CEP250,PITPNB,CNOT1,TOPBP1,NUFIP1,PLEC,MDC1,ITPR1,WDR89,AP5Z1,UBQLN4,MIS18BP1,RNF168,NSMCE2,AAAS,AHI1,E2F1,ACY1,NCLN,DNAJC14,KIAA0368,TBC1D15,CLCC1,L3MBTL2,CD2BP2,SNAI2,MGME1,FKBP1A,ATAD5,XYLB,TRIB1,NEIL3,POLR2M,TCOF1,DGCR8,RAB33B,TOP2A,RFC2,TXNL1,KHSRP,PCBP2,MCMBP,NUP85,CEP152,mir-199,AP4M1,DCK,SEC24B,ACTB,PAICS,RQCD1,IQSEC2,ATXN2L,NCAPG2,RRM1,GLTP,RAD54B,FTL,KIF15,ATL2,RBM6,REV1,MMS19,DENND1A,DUS3L,SEC62,ZFP36L2,COBLL1,NCAM1,OSGEPL1,FMNL3,PFN1,LAMTOR2,MMP16,MAP1B,ZNF609,ZNF91,UBA2,RELL1,CCNL1,FAM208A,USF3,ATG4C,ARHGEF40,SRSF1,POLD3,PTRH2,STAG1,EZH2,RYR3,CDCA3,BRCA1,RAD51C,C7orf50,P4HB,ZNF212,ZC3H6,BIRC6,MED14,ARRB2,CASP2,MBTPS1,NUAK1,BAZ1B,CDK2,TEX261,RFC3,KDM3A,TEAD4,BRD2,MED23,PA2G4,GTF3C5,PKM,WDHD1,CENPP,ZMIZ1,MCM4,NFX1,PCK2,RRN3,ARSB,IPO5,TM9SF1,E2F8,RASSF1,MAP2K7,MTRR,TRA2B,PANK2,COTL1,let-7,GABBR1,FCHSD2,ERBB3,USP1,PSMA1,HIVEP2,AFF1,C19orf68,ZNF382,CIART,KIF24,U2SURP,SPR,CAD,TONSL,CASP8AP2 |
| E2F3A Liver Proliferation                  | 9.79E-02    | TP53,SLC20A1,RAF1,MAP2K7,BIRC6,GFER,SKP2,MYC,FADD,CCNE1,MAPK14,RARA,E2F1,CDKN1A,DLC1,CDK2,LGALS1                                                                                                                                                                                                                                                                                                                                                                                                                                                                                                                                                                                                                                                                                                                                                                                                                                                                                                                                                                                                                                                                                                                                                                                                                                                                                                                                                                                                                                                                                                                                                                                                                                                                                                                                                                                                                  |
| E2F3A Liver Damage                         | 1.88E-01    | TP53,mir-199,Gm21596/Hmgb1,MAPK14,DUSP1,POLA1,CDKN1A,GFER,GABBR1,FKBP1A,RASSF1                                                                                                                                                                                                                                                                                                                                                                                                                                                                                                                                                                                                                                                                                                                                                                                                                                                                                                                                                                                                                                                                                                                                                                                                                                                                                                                                                                                                                                                                                                                                                                                                                                                                                                                                                                                                                                    |
| E2F3A Liver Dysplasia                      | 1.88E-01    | RARA,E2F1                                                                                                                                                                                                                                                                                                                                                                                                                                                                                                                                                                                                                                                                                                                                                                                                                                                                                                                                                                                                                                                                                                                                                                                                                                                                                                                                                                                                                                                                                                                                                                                                                                                                                                                                                                                                                                                                                                         |
| E2F3A Biliary Hyperplasia                  | 2.84E-01    | MYC                                                                                                                                                                                                                                                                                                                                                                                                                                                                                                                                                                                                                                                                                                                                                                                                                                                                                                                                                                                                                                                                                                                                                                                                                                                                                                                                                                                                                                                                                                                                                                                                                                                                                                                                                                                                                                                                                                               |
| E2F3A Liver Fibrosis                       | 3.32E-01    | TP53,MAPK14,MMP8,POLA1,NAGLU,RPGRIP1L,LGALS1                                                                                                                                                                                                                                                                                                                                                                                                                                                                                                                                                                                                                                                                                                                                                                                                                                                                                                                                                                                                                                                                                                                                                                                                                                                                                                                                                                                                                                                                                                                                                                                                                                                                                                                                                                                                                                                                      |
| E2F3A Liver Steatosis                      | 3.84E-01    | UPP1                                                                                                                                                                                                                                                                                                                                                                                                                                                                                                                                                                                                                                                                                                                                                                                                                                                                                                                                                                                                                                                                                                                                                                                                                                                                                                                                                                                                                                                                                                                                                                                                                                                                                                                                                                                                                                                                                                              |
| E2F3A Liver Hematopoiesis                  | 4.36E-01    | KRAS,FEN1                                                                                                                                                                                                                                                                                                                                                                                                                                                                                                                                                                                                                                                                                                                                                                                                                                                                                                                                                                                                                                                                                                                                                                                                                                                                                                                                                                                                                                                                                                                                                                                                                                                                                                                                                                                                                                                                                                         |
| E2F3A Liver Regeneration                   | 4.87E-01    | CCNE1,MAP2K7,GFER,BIRC5,CDK2                                                                                                                                                                                                                                                                                                                                                                                                                                                                                                                                                                                                                                                                                                                                                                                                                                                                                                                                                                                                                                                                                                                                                                                                                                                                                                                                                                                                                                                                                                                                                                                                                                                                                                                                                                                                                                                                                      |
| E2F3A Liver Inflammation/Hepatitis         | 5.52E-01    | TP53,mir-199,POLA1,TLR7,GABBR1,NAGLU,FKBP1A,GPT,RASSF1                                                                                                                                                                                                                                                                                                                                                                                                                                                                                                                                                                                                                                                                                                                                                                                                                                                                                                                                                                                                                                                                                                                                                                                                                                                                                                                                                                                                                                                                                                                                                                                                                                                                                                                                                                                                                                                            |
| E2F3A Liver Hemorrhaging                   | 5.74E-01    | DGCR8,FKBP1A                                                                                                                                                                                                                                                                                                                                                                                                                                                                                                                                                                                                                                                                                                                                                                                                                                                                                                                                                                                                                                                                                                                                                                                                                                                                                                                                                                                                                                                                                                                                                                                                                                                                                                                                                                                                                                                                                                      |
| E2F3A Liver Failure                        | 6.09E-01    | TP53,DUSP1,TOP2A                                                                                                                                                                                                                                                                                                                                                                                                                                                                                                                                                                                                                                                                                                                                                                                                                                                                                                                                                                                                                                                                                                                                                                                                                                                                                                                                                                                                                                                                                                                                                                                                                                                                                                                                                                                                                                                                                                  |
| E2F3A Liver Cirrhosis                      | 1.00E+00    | TP53,mir-199,ABCC1,RASSF1                                                                                                                                                                                                                                                                                                                                                                                                                                                                                                                                                                                                                                                                                                                                                                                                                                                                                                                                                                                                                                                                                                                                                                                                                                                                                                                                                                                                                                                                                                                                                                                                                                                                                                                                                                                                                                                                                         |

## Supplemental Table 6. Liver related IPA functions for E2F1, E2F3A and E2F3B promoter targets

| ChIP-se | Category                  | B-H p-value | Genes |
|---------|---------------------------|-------------|-------|
| E2F3A   | Liver<br>Enlargement      | 1.00E+00    | SSTR5 |
| E2F3A   | Liver<br>Hepatomegal<br>y | 1.00E+00    | SSTR5 |



## Supplemental Table 6. Liver related IPA functions for E2F1, E2F3A and E2F3B promoter targets

| ChIP-se Category               | B-H p-value | Genes                                                                                                                                                                                                                                                                                                                                                                                                                                                                                                                                                                                                                                                                                                                                                                                                                                                                                                                                                                                                                                                                                                                                                                                                                                                                                                                                                                                                                                                                                                                                                                                                                                                                                                                                                                                                                                                                                                                                                                                                                                                                                                                                                                                                                                                                                                                                                                                                                                                                                                                                                                                                                                                                                                                                                                                                                                                                                                                                                                                                                                                                                                                                                                                                                                                                                                                                                                                                                                                                                                                                                                                                                                                                                                                                                                                                                                                                                                                                                                                                                                                                                                                                                                                                                                                                                                                                                                                                                                                                                                                                                                                                                                                                                                                                                                                                                                                                                                                                                                                                                                                                                                                                                                                                                                                                                                                                                                                                                                                                                                                                                                                                                                                                                                                                                                                                                                                                                                                                                                                                                                                       |
|--------------------------------|-------------|-------------------------------------------------------------------------------------------------------------------------------------------------------------------------------------------------------------------------------------------------------------------------------------------------------------------------------------------------------------------------------------------------------------------------------------------------------------------------------------------------------------------------------------------------------------------------------------------------------------------------------------------------------------------------------------------------------------------------------------------------------------------------------------------------------------------------------------------------------------------------------------------------------------------------------------------------------------------------------------------------------------------------------------------------------------------------------------------------------------------------------------------------------------------------------------------------------------------------------------------------------------------------------------------------------------------------------------------------------------------------------------------------------------------------------------------------------------------------------------------------------------------------------------------------------------------------------------------------------------------------------------------------------------------------------------------------------------------------------------------------------------------------------------------------------------------------------------------------------------------------------------------------------------------------------------------------------------------------------------------------------------------------------------------------------------------------------------------------------------------------------------------------------------------------------------------------------------------------------------------------------------------------------------------------------------------------------------------------------------------------------------------------------------------------------------------------------------------------------------------------------------------------------------------------------------------------------------------------------------------------------------------------------------------------------------------------------------------------------------------------------------------------------------------------------------------------------------------------------------------------------------------------------------------------------------------------------------------------------------------------------------------------------------------------------------------------------------------------------------------------------------------------------------------------------------------------------------------------------------------------------------------------------------------------------------------------------------------------------------------------------------------------------------------------------------------------------------------------------------------------------------------------------------------------------------------------------------------------------------------------------------------------------------------------------------------------------------------------------------------------------------------------------------------------------------------------------------------------------------------------------------------------------------------------------------------------------------------------------------------------------------------------------------------------------------------------------------------------------------------------------------------------------------------------------------------------------------------------------------------------------------------------------------------------------------------------------------------------------------------------------------------------------------------------------------------------------------------------------------------------------------------------------------------------------------------------------------------------------------------------------------------------------------------------------------------------------------------------------------------------------------------------------------------------------------------------------------------------------------------------------------------------------------------------------------------------------------------------------------------------------------------------------------------------------------------------------------------------------------------------------------------------------------------------------------------------------------------------------------------------------------------------------------------------------------------------------------------------------------------------------------------------------------------------------------------------------------------------------------------------------------------------------------------------------------------------------------------------------------------------------------------------------------------------------------------------------------------------------------------------------------------------------------------------------------------------------------------------------------------------------------------------------------------------------------------------------------------------------------------------------------------------------------------------------------|
| E2F3B Hepatocellular Carcinoma | 1.65E-09    | GARS, TLE1, FRMD6, TMEM231, POR, TRIM32, GORASP2, PPRC1, ADA, SART3, RELT, TMEM67, ZBTB5, TANC1, DVL2, HIST1H2BM, EYA3, ALCAM, ELMO2, DDIT3, SLC1A5, CDK10, TIPARP, IBTK, RNF19A, ATN1, UBE3C, SLC12A6, SDHA, VPS16, IPO7, ID3, BUB1, KPNB1, MTHFD1L, AP1G1, CDKN2A, EEF1A1, TROAP, INTS1, LHFPL2, MTMR2, PGM1, PTPDC1, PHRF1, DYNC1H1, BCL2L1, KIAA0895L, H3F3A/H3F3B, SEC61A2, CBX3, MCCC2, ZC3H7B, HPS5, RAB23, KLF10, ZBTB2, LSM2, C16orf59, NCS1, ILKAP, IGSF8, FRA10AC1, GALNT9, MEF2A, HERPUD1, FRMD4A, SOD1, SNX27, PPM1G, HTATS1, CENPI, TFCP2, ING1, MAP4K4, MCM6, ASPSCR1, ZNF628, FAM20C, UBR2, FNDC3B, WBSCR17, RRAGB, PPP1R21, ADIPOR1, RNF38, RASGRF1, TDP2, RAB17, UAP1, CCNT2, PRIM2, SPECC1L, NOVA1, HIRA, PLEC, AGFG2, AP5Z1, TTL9, MEX3A, SUCO, RNF168, PHLDB1, C11orf30, NCLN, RCBTB1, KIAA0368, ARHGAP35, SNAI2, GALC, NCAPD3, PTPN13, PLAGL1, SPATA13, FKBP1A, DNAJA1, TOR1AIP1, TYW1, NEIL3, HK2, RINT1, TICRR, RFC2, IGF1R, TXNL1, TCTN3, VCL, ZNF25, PSMB9, MCMBP, NUP85, CEP152, STAMBPL1, BANP, PLK1, ACRYL, F3, NCAPG2, RRM1, NUDT5, ZNF546, SBF1, ZNF507, TRERF1, COBLL1, NCAM1, FMNL3, ATRIP, FBXW7, DHODH, ZNF91, FAM208A, TBC1D4, ESPN, KHNYN, DZIP3, ZNF717, TFDP2, RPRD2, PANK4, FAM193A, STIL, COL4A1, CLTC, BIRC6, DTNB, ALAD, ATP10A, WHSC1L1, BRAT1, COL6A3, IFT81, SCRIB, C15orf41, RCE1, KBTBD8, FADS1, LRIG3, ZMIZ1, TRIM24, USP47, RPAIN, TMEM220, LRRK2, TCF7L1, PFKP, TSHZ3, ZNF382, FAF1, KIAA1033, TSEN34, PAN3, ZDHHC12, MTRF1L, USP34, RAF1, IQCK, HMMR, RALGAPB, ASCC2, FAM208B, ATP2A2, RNASE4, ADH5, DOCK11, RCL1, CCDC122, CENPE, WDR47, MGAT1, SGSM2, GNE, TYMS, CBX8, ASF1B, PHIP, PAPD4, ESPL1, APPL2, PAM, EEF2, ZBTB43, MDM1, WDR81, ZNF496, ATE1, AGPAT4, PLEKHG2, MORC2, ATXN7L3, MIDN, ST3GAL1, GTSE1, ANAPC5, VPS37B, ZNF644, CENPT, CHD1L, PTPRA, TRAPPC5, INF2, HACE1, FAM188B, ERCC4, FBXO10, PTPN2, ODF2L, HNRNPA2B1, CDK4, KIAA0754, PRPF4, PGS1, LRRFIP1, SDK1, CDKN3, TMEM209, NAA15, TMEM260, ALG8, ASPH, NFE2L2, RAD21, CYP51A1, ESCO1, FBXO21, SLC35A5, CCDC57, ZMYM1, KLHDC2, WIPF2, TUBGCP6, ING5, LARP4B, NCAPD2, SLC29A1, IGHMBP2, ZFPM2, UBR4, DDX39B, ABCF2, EIF4A1, CDKN1A, ZFH2, PSAP, CEP112, LDHA, PPIL1, ID4, TCF7L2, PSEN1, LRIG2, MEGF9, CAMK1D, MSH3, KIF1B, TSFM, ABCC10, PIEZO1, TGFB2, MYC, SMPD4, AHDC1, GDE1, SUGT1, CACTIN, EIF4B, CLASP1, SPECC1, TEX264, CCDC18, C3orf58, FSTL3, KANK2, ENDOD1, PSMD6, B3GALNT1, TUSC3, TBL1X, ARIH1, CDC42BPB, TAF1, HNRNPAB, UGP2, XRCC6, SEPT10, SMCHD1, RUSC2, HSP90AA1, MAD1L1, NCKAP5L, SSFA2, FAM83D, RBBP4, DPYSL3, UBE2N, RPS6KA3, DNAJC10, NEURL4, WDR6, VPS4A, IGF2BP1, RAD50, STIM2, CCNA2, LYST, AHNAC, NOP58, MEX3B, ACO1, VARS, CIZ1, LRRC8A, POMT2, HAUS8, RFX1, AP1S2, CHERP, RALY, ZFPL1, NMT2, HSPD1, NFKBIL1, MTHFD1, FAIM, SH3PD2A, SLK, PHF19, LSM11, PSMD2, C5orf22, SGK1, APIP, ZNF451, SFPQ, KPNA1, RICTOR, RECQL, CHST2, DYNLL1, NCOA7, TTF2, HNRNPUL1, SEC24A, TMEM55B, NAT10, RCBTB2, ITPR1, PLCL2, FANCC, UBQLN4, TERF2, DOCK1, YARS, YTHDF3, CPNE8, IRS1, BHLHE40, E2F1, RGL2, LRP8, HELB, CD2BP2, VASH2, PKD2, SASS6, VCAN, XYLB, BCDIN3D, TRIB1, WDFY1, NCOA2, POLR2M, SLC6A17, DAP3, E2F5, MAP1LC3B, LPP, NCKIPSD, PLOD3, BRMS1L, RAD51B, ATXN2L, PCDH9, SIN3A, KIF15, ABL2, RBM6, HEATR5A, NCOR2, ZFP36L2, USP49, FZR1, ANKS1B, INSIG1, DIAPH3, FNIP2, CCNL1, USF3, DPY19L4, MBNL3, LARS, UBXN4, EZH2, ALG6, DARS, NIPBL, HTRA2, MYO10, PMPCA, RASAL2, FGFR1, LMNA, MARS, GSR, ARRB2, PLEKHH2, ITPRIPL1, PTPRS, PML, PFAS, BCL9L, RFC3, KDM3B, TEAD4, TNRC6B, ZBTB7A, MED23, GTF2F2, MARK2, GANAB, SP1, CIT, RABGGTB, LTBP4, ATG16L2, ZNHIT2, TM9SF1, MAP2K7, CKS2, MRC2, DCTPP1, let-7, RPS6KA5, KIAA2026, KIF24, PPP6R1, PANK3, WRB, PAQR4, TONSL, HMGC, SLC9A8, DPY19L3, BCL2L11, MCM7, NPM1, mir-130, RPE, POLA1, TAB2, CCNB2, GPSM2, MAP1A, DUSP11, HCF1, NPAT, TCF3, RGP1, ABCA7, SP4, DAXX, CNTRL, ITPR3, C3orf67, ECT2, CCDC138, FLNB, NRG2, PRDX1, BAG6, CEBPZ, TTK, CDC20B, HEXB, C2CD5, SCFD1, TUBB4B, ZNF521, MAPK6, GREM1, SPSB4, KAT5, IGF2R, MCM3, CSF1, TFB1M, KANSL2, KIF23, SOCS3, NAV2, MPRIIP, YWHAH, PCDH18, GNPAT, NUP58, ZFPM1, RPRG1, ECD, PPFIBP1, SOX2, TSEN15, ARHGAP20, EPHA7, OSBPL1A, STXBP1, SESN3, POLR1B, IARS2, WEE1, IFT74, DNA2, H6PD, TXNRD1, OSBPL8, KIAA0907, SF3B4, PBRM1, PVRL3, MCM3AP, RBBP5, IQGAP1, NFAT5, ERBB2, VAV2, NDUFV1, ADAM15, PSMC3IP, TSN, ALS2, UMP, S, MTO1, SLC36A4, CKS1B, ZDHHC3, CCP110, RTCB, MTBP, GHITM, MKI67, ARNT, ATP1A1, RARA, MED16, SLC39A13, BAG5, RTEL1, CNOT1, PTPRG, MMAB, MDC1, MON2, ADAR, MED12, ANKRD26, FARSA, ARHGAP5, FUT10, AAAS, MYO9A, AHI1, DNAJC14, ME2, CLCC1, PRICKLE1, SQLE, RREB1, MAP2, CEP78, ARHGFE7, POLQ, TRPT1, PITRM1, AAMP, KANSL3, ANKRD12, EAF1, ATAD5, CDH11, TIGD5, DIS3L2, RAB33B, CREB1, NUP205, ZCCHC6, POLE, PAICS, TIAL1, MDM2, SLIT2, SCM1, CNKSR3, C1orf159, SCAF11, GLTP, SPIDR, INTS6, GMPS, ATL2, GTPBP3, REV1, H2AFY, UBN1, BTBD7, FARP1, ARF1, PRMT3, GXYLT1, UNC5B, ZNF609, DICER1, RELL1, CAMK2D, ZNF318, SCARB1, FASN, ABLIM2, CDCA3, STX11, HK1, SOX4, P4HB, TRIOBP, DTNBP1, DCTN4, USP38, PREX2, MUT, HERC2, ANKRD10, NASP, CTDP1, LUC7L2, LOXL1, NUA1, SBNO2, JAG1, CDK2, ARL2, KDM3A, BRD2, SRM, C5orf42, PA2G4, AGAP1, SRRT, WDHD1, KMT2C, GTF2B, FAM13B, IFRD1, NCL, YLPM1, IPO5, ATG16L1, RHBDD3, RASSF1, UBR5, HSPG2, MTRR, TTC13, TRA2B, PANK2, POC1B, COTL1, HSPH1, METTL1, SAP25, DOCK7, C19orf68, CIART, PIAS3, MAP7D1, U2SURP, PLEKHG5, IQCE, NFIB, ADAM9, GRPEL1, CBFA2T2, CENPH, CASP8AP2, PRKAB2, KRAS, PCIF1, TOMM70A, CCND1, PKN2, SNRNP48, PAN2, NEK6, ZNF687, HIPK2, MSTO1, IQGAP3, ALDH7A1, TP53, FBXO9, ZDHHC5, GRM8, TMEM201, RRM2, USP19, ANO6, SMG5, TBK1, MYO1C, KLF13, RBM4, SKP2, ATF2, HSPA8, SCAF8, CLK2, PCYOX1L, KIAA1429, LTN1, SAMD4A, NUP188, TRIM33, GCFC2, PRPF3, THOC3, KIAA1549, GPC2, SLC35B2, MMS22L, HARBI1, LBR, COL16A1, CD47, TRIM27, SORBS1, C1orf112, CSNK2B, ZBTB45, DIS3, TOB1, FRK, PLA2G4A, RIC8B, MBD3, ZCWPW1, SPICE1, SEMA3C, WRAP53, ILF3, RASA3, GNB2L1, PINX1, KNTC1, TBC1D2, KIF16B, LEMD3, TNRC6C, PHF20. |

## Supplemental Table 6. Liver related IPA functions for E2F1, E2F3A and E2F3B promoter targets

| ChIP-se Category                              | B-H p-value | Genes                                                                                                                                                                                                                                                                                                                                                                                                                                                                                                                                                                                                                                                                                                                                                                                                                                                                                                                                                                                                                                                                                                                                                                                                                                                                                                                                                                                                                                                                                                                                                                                                                                                                                                                                                                                                                                                                                                                                                                                                                                                                                                                                                                                                                                                                                                                                                                                                                                                                                                                                                                                                                                                                                                                                                                                                                                                                                                                                                                                                                                                                                                                                                                                                                                                                                                                                                                                                                                                                                                                                                                                                                                                                                                                                                                                                                                                                                                                                                                                                                                                                                                                                                                                                                                                                                                                                                                                                                                                                                                                                                                                                                                                                                                                                                                                                                                                                                                                                                                                                                                                                                                                                                                                                                                                                                                                                                                                                                                                                                                                                                                                                                                                                                                                                                                                                                                                                                                                                                                                                                                                                                                       |
|-----------------------------------------------|-------------|-------------------------------------------------------------------------------------------------------------------------------------------------------------------------------------------------------------------------------------------------------------------------------------------------------------------------------------------------------------------------------------------------------------------------------------------------------------------------------------------------------------------------------------------------------------------------------------------------------------------------------------------------------------------------------------------------------------------------------------------------------------------------------------------------------------------------------------------------------------------------------------------------------------------------------------------------------------------------------------------------------------------------------------------------------------------------------------------------------------------------------------------------------------------------------------------------------------------------------------------------------------------------------------------------------------------------------------------------------------------------------------------------------------------------------------------------------------------------------------------------------------------------------------------------------------------------------------------------------------------------------------------------------------------------------------------------------------------------------------------------------------------------------------------------------------------------------------------------------------------------------------------------------------------------------------------------------------------------------------------------------------------------------------------------------------------------------------------------------------------------------------------------------------------------------------------------------------------------------------------------------------------------------------------------------------------------------------------------------------------------------------------------------------------------------------------------------------------------------------------------------------------------------------------------------------------------------------------------------------------------------------------------------------------------------------------------------------------------------------------------------------------------------------------------------------------------------------------------------------------------------------------------------------------------------------------------------------------------------------------------------------------------------------------------------------------------------------------------------------------------------------------------------------------------------------------------------------------------------------------------------------------------------------------------------------------------------------------------------------------------------------------------------------------------------------------------------------------------------------------------------------------------------------------------------------------------------------------------------------------------------------------------------------------------------------------------------------------------------------------------------------------------------------------------------------------------------------------------------------------------------------------------------------------------------------------------------------------------------------------------------------------------------------------------------------------------------------------------------------------------------------------------------------------------------------------------------------------------------------------------------------------------------------------------------------------------------------------------------------------------------------------------------------------------------------------------------------------------------------------------------------------------------------------------------------------------------------------------------------------------------------------------------------------------------------------------------------------------------------------------------------------------------------------------------------------------------------------------------------------------------------------------------------------------------------------------------------------------------------------------------------------------------------------------------------------------------------------------------------------------------------------------------------------------------------------------------------------------------------------------------------------------------------------------------------------------------------------------------------------------------------------------------------------------------------------------------------------------------------------------------------------------------------------------------------------------------------------------------------------------------------------------------------------------------------------------------------------------------------------------------------------------------------------------------------------------------------------------------------------------------------------------------------------------------------------------------------------------------------------------------------------------------------------------------------------------------------------------------------|
| E2F3B Liver<br>Hyperplasia/Hyperproliferation | 1.65E-09    | GARS, TLE1, FRMD6, TMEM231, TRIM32, POR, PPRC1, GORASP2, ADA, SART3, RELT, TMEM67, ZBTB5, TANC1, DVL2, HIST1H2BM, EYA3, ALCAM, ELMO2, DDIT3, SLC1A5, CDK10, TIPARP, IBTK, RNF19A, ATN1, UBE3C, SLC12A6, SDHA, VPS16, IPO7, ID3, BUB1, KPNB1, MTHFD1L, AP1G1, CDKN2A, EEF1A1, TROAP, INTS1, LHFPL2, MTMR2, PGM1, PTPDC1, PHRF1, DYNC1H1, BCL2L1, H3F3A/H3F3B, KIAA0895L, SEC61A2, CBX3, MCCC2, ZC3H7B, HPS5, RAB23, KLF10, ZBTB2, LSM2, C16orf59, NCS1, ILKAP, IGSF8, FRA10AC1, GALNT9, MEF2A, HERPUD1, SOD1, SNX27, FRMD4A, PPM1G, HTATS1, CENPI, TFCP2, ING1, MAP4K4, MCM6, ASPSCR1, ZNF628, FAM20C, UBR2, FNDC3B, WBSR17, RRAGB, PPP1R21, ADIPOR1, RNF38, RASGRF1, TDP2, RAB17, SPECC1L, UAP1, CCNT2, PRIM2, NOVA1, HIRA, PLEC, AGFG2, AP5Z1, TTL9, MEX3A, SUCO, RNF168, PHLDB1, C11orf30, NCLN, RCBTB1, KIAA0368, ARHGAP35, SNAI2, GALC, NCAPD3, PTPN13, PLAGL1, SPATA13, FKBP1A, DNAJA1, TOR1AIP1, TYW1, NEIL3, HK2, RINT1, TICRR, RFC2, IGF1R, TXNL1, TCTN3, VCL, ZNF25, PSMB9, MCMBP, NUP85, CEP152, STAMBPL1, BANP, PLK1, ACRYL, F3, NCAPG2, RRM1, NUDT5, ZNF546, SBF1, ZNF507, TRERF1, COBLL1, NCAM1, FMNL3, ATRIP, FBXW7, DHODH, ZNF91, FAM208A, TBC1D4, ESPN, KHNYN, DZIP3, ZNF717, TFDP2, RPRD2, PANK4, FAM193A, STIL, COL4A1, CLTC, BIRC6, DTNB, ALAD, ATP10A, WHSC1L1, BRAT1, COL6A3, IFT81, SCRIB, C15orf41, RCE1, KBTBD8, FADS1, LRIG3, ZMIZ1, TRIM24, USP47, RPAIN, TMEM220, LRRK2, TCF7L1, PFKP, TSHZ3, ZNF382, FAF1, KIAA1033, TSEN34, PAN3, ZDHHC12, MTRF1L, USP34, RAF1, IQCK, HMMR, RALGAPB, ASCC2, SLC35C1, FAM208B, ATP2A2, RNASE4, ADH5, DOCK11, RCL1, CCDC122, CENPE, WDR47, MGAT1, SGSM2, GNE, TYMS, CBX8, ASF1B, PHIP, PAPD4, ESPL1, YAP1, APPL2, PAM, EEF2, ZBTB43, MDM1, WDR81, ZNF496, ATE1, AGPAT4, PLEKHG2, MORC2, ATXN7L3, MIDN, ST3GAL1, GTSE1, ANAPC5, VPS37B, ZNF644, CENPT, CHD1L, PTPRA, TRAPPC5, INF2, FANCM, HACE1, FAM188B, ERCC4, FBXO10, PTPN22, HNRNPA2B1, ODF2L, CDK4, KIAA0754, PRPF4, PGS1, LRRFIP1, SDK1, CDKN3, TMEM209, NAA15, TMEM260, ALG8, ASPH, NFE2L2, RAD21, CYP51A1, ESCO1, FBXO21, SLC35A5, CCDC57, ZMYM1, KLHDC2, WIPF2, TUBGCP6, LZTS2, ING5, LARP4B, NCAPD2, SLC29A1, CCNE1, IGHMBP2, ZFPM2, UBR4, DDX39B, ABCF2, EIF4A1, CDKN1A, ZFH2, PSAP, CEP112, LDHA, PPIL1, ID4, TCF7L2, PSEN1, LRIG2, MEGF9, CAMK1D, MSH3, KIF1B, TSFM, ABCC10, PIEZO1, TGFB2, MYC, SMPD4, AHDC1, GDE1, SUGT1, CACTIN, EIF4B, CLASP1, SPECC1, TEX264, CCDC18, FSTL3, C3orf58, KANK2, ENDOD1, PSMC6, B3GALNT1, TUSC3, TBL1X, ARIH1, CDC42BPB, HNRNPAB, TAF1, UGP2, XRCC6, ETV4, SEPT10, SMCHD1, MAD1L1, RUSC2, HSP90AA1, NCKAP5L, SSFA2, FAM83D, RBBP4, DPYSL3, UBE2N, RPS6KA3, DNAJC10, NEURL4, WDR6, VPS4A, IGF2BP1, RAD50, STIM2, CCNA2, LYST, AHNK, TIMP1, NOP58, MEX3B, ACO1, VARS, CIZ1, LRRRC8A, POMT2, HAUS8, RFX1, AP1S2, CHERP, RALY, NMT2, ZFPL1, HSPD1, MTHFD1, NFKBIL1, SH3PXD2A, FAIM, SLK, MAPK14, PHF19, LSM11, PSM2, C5orf22, SGK1, APIP, ZNF451, SFPQ, KPNA1, RICTOR, RECQL, CHST2, VEGFA, NCOA7, DYNLL1, TTF2, HNRNPUL1, SEC24A, TMEM55B, NAT10, RCBTB2, ITPR1, PLCL2, FANCC, UBLN4, TERF2, DOCK1, YARS, YTHDF3, CPNE8, IRS1, BHLHE40, E2F1, RGL2, LRP8, HELB, CD2BP2, VASH2, PKD2, SASS6, VCAN, XYLB, BCDIN3D, TRIB1, WDFY1, NCOA2, POLR2M, SLC6A17, DAP3, E2F5, MAP1LC3B, LPP, NCKIPSD, PLOD3, BRMS1L, RAD51B, HNRNPDL, ATXN2L, PCDH9, SIN3A, KIF15, ABL2, RBM6, HEATR5A, NCOR2, ZFP36L2, USP49, FZR1, ANKS1B, INSIG1, DIAPH3, FNIP2, CCNL1, USF3, DPY19L4, MBNL3, LARS, UBXN4, EZH2, ALG6, DARS, NIPBL, HTRA2, MYO10, PMPCA, RASAL2, FGFR1, LMNA, MARS, GSR, ARRB2, PLEKHH2, ITPRIPL1, PTPRS, PML, PFAS, BCL9L, RFC3, KDM3B, TEAD4, TNRC6B, ZBTB7A, MED23, GTF2F2, MARK2, ING4, GANAB, SP1, CIT, RABGGTB, LTBP4, ATG16L2, ZNHIT2, TM9SF1, MAP2K7, CKS2, MRC2, DCTPP1, let-7, RPS6KA5, KIAA2026, KIF24, PPP6R1, B4GALT1, PANK3, WRB, PAQR4, TONSL, HMGCR, SLC9A8, DPY19L3, BCL2L11, MCM7, NPM1, mir-130, RPE, POLA1, TAB2, CCNB2, GPSM2, MAP1A, DUSP11, HCFC1, SLC2A1, NPAT, TCF3, RGP1, ABCA7, SP4, DAXX, CNTRL, ITPR3, C3orf67, ECT2, CCDC138, FLNB, NRG2, PRDX1, BAG6, CEBPZ, TTK, PNRC1, CDC20B, HEXB, C2CD5, SCFD1, TUBB4B, ZNF521, MAPK6, GREM1, SPSB4, KAT5, IGF2R, MCM3, MSH2, CSF1, TFB1M, KANSL2, KIF23, SOCS3, NAV2, MPRIP, YWHAH, PCDH18, GNPAT, NUP58, ZFPM1, RPGRIP1L, ECD, PPFIBP1, SOX2, TSEN15, ARHGAP20, SEC63, EPHA7, OSBPL1A, STXBP1, SESN3, HDAC2, POLR1B, IARS2, WEE1, IFT74, DNA2, H6PD, TXNRD1, OSBPL8, KIAA0907, SF3B4, PBRM1, PVRL3, MCM3AP, RBBP5, IQGAP1, NFAT5, ERBB2, VAV2, NDUFV1, ADAM15, PSMC3IP, TSN, ALS2, UMPS, BIRC5, MTO1, SLC36A4, CKS1B, ZDHHC3, CCP110, RTCB, MTBP, RAN, GHITM, MKI67, ARNT, ATP1A1, RARA, MED16, SLC39A13, BAG5, RTEL1, CNOT1, PTPRG, MMAB, MDC1, MON2, ADAR, MED12, ANKRD26, FARSA, ARHGAP5, FUT10, AAAS, MYO9A, AHI1, DNAJC14, ME2, CLCC1, PRICKLE1, SQLE, RREB1, MAP2, CEP78, ARHGEF7, POLQ, TRPT1, PITRM1, AAMP, KANSL3, ANKRD12, EAF1, ATAD5, CDH11, TIGD5, DIS3L2, RAB33B, CREB1, NUP205, ZCCHC6, POLE, PAICS, TIAL1, MDM2, SLIT2, SCM1, CNKSR3, C1orf159, SCAF11, GLTP, SPDR, INTS6, GMPS, ATL2, GTPBP3, REV1, H2AFY, UBN1, BTBD7, FARP1, ARF1, PRMT3, GXYLT1, UNC5B, ZNF609, DICER1, RELL1, CAMK2D, ZNF318, SCARB1, STAG1, FASN, ABLIM2, CDCA3, STX11, HK1, SOX4, P4HB, TRIOBP, DTNBP1, DCTN4, USP38, POREX2, MUT, GPAA1, HERC2, ANKRD10, NASP, CTD1P1, LUC7L2, LOXL1, NUA1, SBNO2, JAG1, CDK2, ARL2, KDM3A, BRD2, SRM, C5orf42, PA2G4, AGAP1, SRRT, WDHD1, KMT2C, GTF2B, FAM13B, IFRD1, NCL, YLPM1, IPO5, ATG16L1, RHBDD3, RASSF1, UBR5, HSPG2, MTRR, TTC13, TRA2B, PANK2, POC1B, COTL1, HSPH1, METTL1, SAP25, DOCK7, C19orf68, CIART, PIAS3, MAP7D1, U2SURP, PLEKHG5, IQCE, NFIB, ADAM9, GRPEL1, CBFA2T2, CENPH, CASP8AP2, PRKAB2, KRAS, PCIF1, TOMM70A, CCND1, PKN2, SNRNP48, PAN2, NEK6, ZNF687, HIPK2, MSTO1, ALDH7A1, IQGAP3, FBXO9, TP53, ZDHHC5, GRM8, TMEM201, RRM2, USP19, ANO6, SMG5, TBK1, MYO1C, KL F13, RBM4, ATF2, SKP2, HSPA8, SCAF8, CLK2, PCYQX1L, KIAA1429, LTN1, SAMD4A, NUP188, TRIM33, GCFC2, PRPF3, THOC3, KIAA1549, GPC2, SLC35B2, MMS22L, HASLC20A1, MYCN, RAF1, TACC3, LHX2, RDH10, SMAD3, CDK4, KRAS, EIF6, MAFK, MAFG, ARF6, BAG1, KAT6A, ATF4, CDK2 |
| E2F3B Liver<br>Hypoplasia                     | 2.10E-03    |                                                                                                                                                                                                                                                                                                                                                                                                                                                                                                                                                                                                                                                                                                                                                                                                                                                                                                                                                                                                                                                                                                                                                                                                                                                                                                                                                                                                                                                                                                                                                                                                                                                                                                                                                                                                                                                                                                                                                                                                                                                                                                                                                                                                                                                                                                                                                                                                                                                                                                                                                                                                                                                                                                                                                                                                                                                                                                                                                                                                                                                                                                                                                                                                                                                                                                                                                                                                                                                                                                                                                                                                                                                                                                                                                                                                                                                                                                                                                                                                                                                                                                                                                                                                                                                                                                                                                                                                                                                                                                                                                                                                                                                                                                                                                                                                                                                                                                                                                                                                                                                                                                                                                                                                                                                                                                                                                                                                                                                                                                                                                                                                                                                                                                                                                                                                                                                                                                                                                                                                                                                                                                             |

## Supplemental Table 6. Liver related IPA functions for E2F1, E2F3A and E2F3B promoter targets

| ChIP-se Category                   | B-H p-value | Genes                                                                                                                                                                                                                                                                                                                                                |
|------------------------------------|-------------|------------------------------------------------------------------------------------------------------------------------------------------------------------------------------------------------------------------------------------------------------------------------------------------------------------------------------------------------------|
| E2F3B Liver Necrosis/Cell Death    | 1.47E-02    | RAF1,SOCS3,SOCS1,SMAD3,TAF10,DICER1,CCND1,ARNT,GSTZ1,MYC,CXCL10,MTF1,MAPK3,ITGAV,ADA,JUND,TP53,STAT6,HBEGF,TBK1,ADAR,IRF1,ATF2,MNT,DAXX,BCL2L1,E2F1,DDIT3,ATF7,ABL1,FKBP1A,NGF,ARF6,TRIM27,TIMP1,CIT,FOXO3,BID,NCL,NFE2L2,RHBDD3,SLC20A1,MYCN,SLC25A4,MAPK9,PLK1,SOD1,HSPD1,F3,XIAP,BAK1,FAIM,FADD,BUB1,MAPK14,ABL2,CDKN1A,ATR,SLC25A5,BCL2L11,CASP7 |
| E2F3B Liver Proliferation          | 2.48E-02    | RAF1,SOCS3,CTGF,MAPK1,SMAD3,DICER1,CCND1,ARNT,VEGFA,TGFBR2,MYC,RARA,SMARCB1,ITGAV,ADA,ATF4,SLC7A5,JUND,DLC1,TIMP2,TP53,BIRC6,HBEGF,SKP2,E2F1,PML,CDK2,PTN,TNFRSF12A,TRIM24,TIMP1,CIT,IGF1R,CEBPA,BID,NFE2L2,SLC20A1,MAP2K7,S1PR2,HDAC1,SMAD7,TOB1,MAPK9,FOXO1,KITLG,FADD,CCNE1,MAPK14,CDKN1A,LGALS1                                                  |
| E2F3B Liver Dysplasia              | 7.29E-02    | RARA,E2F1,PML,CCND1                                                                                                                                                                                                                                                                                                                                  |
| E2F3B Liver Hematopoiesis          | 3.24E-01    | SOCS1,SOCS3,KRAS,CBFB,FEN1,TMOD3                                                                                                                                                                                                                                                                                                                     |
| E2F3B Liver Degeneration           | 3.43E-01    | SOCS1,TAB2,TBK1,XRCC5,SRSF10                                                                                                                                                                                                                                                                                                                         |
| E2F3B Liver Fibrosis               | 3.43E-01    | SOCS3,SOCS1,CTGF,DDIT3,LHX2,F2R,MAPK1,SMAD3,POLA1,GNB2L1,RPGRIP1L,POLB,HDGF,CXCL10,VEGFA,TGFBR2,TIMP1,RORA,ADK,CEBPA,ADORA2B,NFE2L2,TIMP2,TP53,S1PR2,FGFR1,SMAD7,TMEM67,POLD1,MAPK14,LGALS1                                                                                                                                                          |
| E2F3B Liver Cirrhosis              | 3.91E-01    | mir-130,ADAM17,CTGF,F2R,TXLNA,PDE4A,TUBB,ADRB3,LBR,FGFR3,NOTCH2,TIMP1,FBLN1,ADK,ADA,TOP2A,GCLM,NFE2L2,RASSF1,TP53,ATP7B,mir-199,TBC1D9,FGFR1,PTCH1,PCNA,BSG,CSF1,SREBF2,PDE5A,JAG1,HMGCR,WNT5A                                                                                                                                                       |
| E2F3B Liver Damage                 | 3.91E-01    | mir-130,SOCS1,DDIT3,POLA1,TNFAIP3,FKBP1A,DICER1,POLB,POR,CXCL10,TGFBR2,GSTZ1,Gm21596/Hmgb1,SCARB1,TIMP1,STUB1,PPP3R1,ADK,IGF1R,JUND,GPX4,NFE2L2,RASSF1,TP53,STAT6,ATG5,mir-199,RDX,MAPK9,SOD1,POLD1,IRF1,BAK1,BCL2L1,MAPK14,BSG,DUSP1,CSF1,CDKN1A,HPRT1,HMGCR                                                                                        |
| E2F3B Liver Inflammation/Hepatitis | 3.91E-01    | mir-130,SOCS1,DDIT3,POLA1,PDE4A,PPIA,FKBP1A,TNFAIP3,POLB,GSTZ1,POR,CXCL10,STUB1,TIMP1,PPP3R1,ADK,CEBPA,IGF1R,BID,PEMT,NFE2L2,RASSF1,RHBDD3,TP53,STAT6,mir-199,MAPK9,SOD1,FANCC,POLD1,XIAP,FAIM,BCL2L1,RIPK1,CSF1,PDE5A,HPRT1,CYR61,HMGCR,CASP7                                                                                                       |
| E2F3B Liver Failure                | 3.91E-01    | TP53,VEGFA,USP8,LARS,ADAM17,TIMP1,DUSP1,TOP2A,CEBPA,MARS,ADRB3,FAIM                                                                                                                                                                                                                                                                                  |
| E2F3B Liver Dysfunction            | 3.91E-01    | FDFT1,ATF6                                                                                                                                                                                                                                                                                                                                           |
| E2F3B Liver Degradation            | 3.91E-01    | ADAR                                                                                                                                                                                                                                                                                                                                                 |
| E2F3B Biliary Hyperplasia          | 5.20E-01    | MYC                                                                                                                                                                                                                                                                                                                                                  |
| E2F3B Liver Congestion             | 5.20E-01    | HEY2                                                                                                                                                                                                                                                                                                                                                 |
| E2F3B Liver Adhesion               | 5.20E-01    | CTGF,SMAD3                                                                                                                                                                                                                                                                                                                                           |
| E2F3B Liver Edema                  | 5.20E-01    | VEGFA                                                                                                                                                                                                                                                                                                                                                |
| E2F3B Liver Hemorrhaging           | 5.38E-01    | TAB2,DGCR8,BID,FKBP1A,TBK1,FAIM                                                                                                                                                                                                                                                                                                                      |

## Supplemental Table 6. Liver related IPA functions for E2F1, E2F3A and E2F3B promoter targets

| ChIP-se Category                                    | B-H p-value | Genes                                                                                                                                                                                                                                                                                     |
|-----------------------------------------------------|-------------|-------------------------------------------------------------------------------------------------------------------------------------------------------------------------------------------------------------------------------------------------------------------------------------------|
| E2F3B Liver<br>Regeneration                         | 5.92E-01    | SOCS3,CCNE1,MAP2K7,CREM,TOB1,BIRC5,NFE2L2,CDK2,ATF2                                                                                                                                                                                                                                       |
| E2F3B Liver<br>Cholestasis                          | 6.11E-01    | NFE2L2                                                                                                                                                                                                                                                                                    |
| E2F3B Liver<br>Steatosis                            | 6.12E-01    | PRKAB1,INSIG1,POLA1,FBXW7,RBL1,CCND1,ARNT,POLB,POR,GSTZ1,RORA,FASN,PRKCDBP,ATF4,IRS2,TP53,GPS2,FSTL3,ANGPTL6,LMNA,HBEGF,FANCC,MUT,PEX2,DUSP1,BHLHE40,IRS1,SSFA2,KDM3A,DDIT3,MARK2,GNA11,PDE4A,ATF6,ID1,MAN2C1,TIPARP,STEAP2,FOXO3,ADK,PEMT,SOD1,POLD1,FOXO1,H2AFY,CDKN1A,PDE5A,RBPJ,HMGCR |
| E2F3B Hepatocellular<br>Peroxisome<br>Proliferation | 6.69E-01    | ABCD3,PEX16                                                                                                                                                                                                                                                                               |
| E2F3B Glutathione<br>Depletion In<br>Liver          | 7.27E-01    | SMAD3                                                                                                                                                                                                                                                                                     |

## Supplemental Table 7. General IPA functions for E2F1, E2F3A and E2F3B promoter targets

| ChIP-seq | Category   | B-H p-value | Genes                                                                                                                                                                                                                                                                                                                                                                                                                                                                                                                                                                                                                                                                                                                                                                                                                                                                                                                                                                                                                                                                                                                                                                                                                                                                                                                                                                                                                                                                                                                                                                                                                                                                                                                                                                                                                                                                                                                                                                                                                                                                                                                                                                                                                                                                                                                                                                                                                                                                                                                                                                                                                                                                                                                                                                                                                                                                                                                                                                                                                                                                                                                                                                                                                                                                                                                                                  |
|----------|------------|-------------|--------------------------------------------------------------------------------------------------------------------------------------------------------------------------------------------------------------------------------------------------------------------------------------------------------------------------------------------------------------------------------------------------------------------------------------------------------------------------------------------------------------------------------------------------------------------------------------------------------------------------------------------------------------------------------------------------------------------------------------------------------------------------------------------------------------------------------------------------------------------------------------------------------------------------------------------------------------------------------------------------------------------------------------------------------------------------------------------------------------------------------------------------------------------------------------------------------------------------------------------------------------------------------------------------------------------------------------------------------------------------------------------------------------------------------------------------------------------------------------------------------------------------------------------------------------------------------------------------------------------------------------------------------------------------------------------------------------------------------------------------------------------------------------------------------------------------------------------------------------------------------------------------------------------------------------------------------------------------------------------------------------------------------------------------------------------------------------------------------------------------------------------------------------------------------------------------------------------------------------------------------------------------------------------------------------------------------------------------------------------------------------------------------------------------------------------------------------------------------------------------------------------------------------------------------------------------------------------------------------------------------------------------------------------------------------------------------------------------------------------------------------------------------------------------------------------------------------------------------------------------------------------------------------------------------------------------------------------------------------------------------------------------------------------------------------------------------------------------------------------------------------------------------------------------------------------------------------------------------------------------------------------------------------------------------------------------------------------------------|
| E2F1     | Cell Cycle | 6.69E-32    | NPM1,POLA1,FRMD6,XRCC2,Ewsr1,AJUBA,SMARCB1,WWOX,TSC2,SENP5,TCERG1,SAFB,AHCY,ETS1,GRK4,HCFC1,CCNE2,RFC1,TCF3,ZBTB5,RAD1,DA<br>XX,RAD18,TINF2,ECT2,FANCA,PIM3,GADD45B,Calm1 (includes<br>others),SMARCA4,DIABLO,RABL6,PELO,RBMX,PIK3C3,ARHGAP19,EXO1,KHDRBS1,GAS1,ARID3A,MCM3,BUB1,KPNB1,ARPP19,MSH2,FBXO5,ACTL6A,CD<br>KN2A,KIF23,SOCS3,YWHAH,RGPD4 (includes<br>others),SMC1A,INTS3,E2F6,AK1,CHMP2A,JUND,ESCO2,SETD8,WEE1,DNA2,RAD54L,AURKA,CDCA2,BCL2L1,DDA1,H3F3A/H3F3B,mir-<br>210,SF3B4,CEP76,RMI2,STK33,KIAA0101,SKA2,BARD1,PIAS1,RNASEH2B,NEDD1,ZNF219,E2F3,PTGES3,LSM2,STUB1,TRIP13,TACC3,LRRC40,RACGAP1,<br>SMARCE1,BIRC5,FANCL,PPM1G,CENPI,E2F7,KLF5,CKS1B,BRCA2,ING1,TUBA1B,CCP110,CEP120,MTBP,PLRG1,DSTN,UBR2,mir-<br>148,RAN,RBL1,XRCC1,CD2AP,CHMP2B,TAOK2,DNMT1,PABPC1,PRR11,HIRA,SEPT7,MTF2,CKAP2,HMGA1,JUNB,CDAN1,CDK19,SGOL1,NEK2,HAUS6,FYN<br>,NCAPD3,CDT1,BTG3,CUL1,GPX1,TRIO,HMGB2,CNTROB,SF3B3,GPR3,RINT1,CETN3,CREB1,RFC2,CEP152,PPIF,BANP,OSBPL9,SPC25,TIAL1,SMC6,PLC<br>G1,MDM2,PLK1,TSG101,CDK1,NCAPG2,RRM1,MUM1,CIRBP,MMS19,CEP192,RBBP6,PRPF19,PFN1,ARF1,VPRBP,FBXW7,YWHAQ,GSPT1,PPP1R7,STAG1,<br>NCAPH,FASN,SNU13,FOSL2,STIL,GJA1,CASP3,NUBP1,BIRC6,RAC1,CDC123,HERC2,PALB2,NASP,Cdc42,SMC2,RPS15A,LFNG,UVRAG,CDK5RAP2,CDK2,<br>PA2G4,GADD45G,SETDB2,MRE11A,DTYMK,UHRF2,TRIM24,POLR2A,NFYA,GMNN,SIPA1,Pvr,CDCA5,IPO5,RASSF1,CALR,NRAS,UHRF1,SNRPB,HAT1,UBE<br>3A,PRMT1,NCAPH2,NR1H2,HMG20B,RPS27L,MIS12,CASP8AP2,MYH10,MAGED1,MYH9,DSN1,SMC5,Ubb,HAUS4,ODC1,C6orf89,STAG3,RUVBL2,IQGAP3,T<br>P53,TYMS,ESPL1,SKP2,HSPA8,ATE1,CCNF,GTSE1,BTG2,NEK4,TFRC,INVS,XRCC5,FANCM,DEK,AKAP8,CDK4,PRPF4,NUF2,MMS22L,KSR1,SPAG5,CDKN<br>3,ARF6,MAP4,DAB2,HJURP,KIF2C,NFE2L2,CDC5L,RAD21,DHX9,PRKDC,PHF6,MAPRE1,GNA12,CUL7,HNRNPD,TDRKH,MLF1,NCAPD2,PES1,CCNE1,TUBA<br>1A,CDKN1A,SPICE1,RAD51AP1,AKAP1,DLGAP5,MAP3K11,MSH3,GNB2L1,RFWD3,BAG3,SMC4,AP2A2,RARG,TGFBR2,MYC,LEMD3,RHOB,RCC1,PIM1,XPO<br>1,FIGNL1,PDCD6,CEP131,MYBL2,CHTF18,E4F1,TAB1,NUCKS1,CLASP1,USP28,NBEAL2,SMC3,PELP1,KANK2,PNN,KIF4A,ORC6,HELLS,BUB1B,KMT2A,CB<br>X1,PIAS4,TAF1,GIPC1,DUSP1,RECQL4,XRCC6,MAD1L1,NDC80,PKMYT1,KLHL21,ACTN4,ARID1A,UTF2,RAD50,RAD51,CDC25B,CCNA2,SHC1,FANCD2,NE<br>T1,RAD17,OPA1,NAMPT,MCM9,RPS3,SUDS3,PRKCA,HAUS8,SLC9A3R1,TUBG1,PRDM4,FOXM1,PSME3,RPA2,NBN,MAPK14,PRKCI,CACUL1,KIF5B,RAD9A<br>,MSH6,ZNF346,CDC34,WNK1,KIF18A,CENPF,PCGF2,CDC7,SFPQ,CDKN2C,HES1,PHACTR4,CHAF1A,INTS7,MXD3,EZR,TARDBP,IRS2,CEP250,ANAPC11,C<br>ENPJ,TIMP2,TIPIN,NDRG1,TOPBP1,FANCG,COPS5,SNAI1,RPA1,FANCC,UBE2S,RAD51D,CCNO,NSMCE2,GAB1,H2AFX,E2F1,MBD4,CHKA,AHCTF1,RGL2,<br>MSH5,CLSPN,HELB,MAPK7,CYR61,YEATS4,AZI2,VASH2,FN1,WWTR1,HMGN1,NUP214,CAMK2N2,CHEK1,ID1,YY1,MTOR,BANF1,DAP3,CEBPA,TOP2A,E2F<br>5,PRKCE,STIM1,MCPH1,HEXIM1,POT1,ZWILCH,NUDCD3,LETM1,DCK,CDC6,POLD1,FADD,KITLG,CHCHD3,RAD54B,KIF15,mir-<br>30,SF3B2,NUP153,SPDYA,MCM2,PDXP,KIF20B,CENPA,FEN1,ZFP36L2,HINFP,SEPT2,FZD7,POLH,BIRC2,FZR1,ORC2,MCM8,ERCC6,MAPK1,DIAPH3,AURK<br>B,TUBB,LMNB1,ROCK2,STMN1,SRSF1,WRN,EZH2,HTRA2,BRCA1,RAD51C,CDC25A,KIF14,Ftx,CDC37,RBL2,GPS2,SNRNP27,STK11,RANBP1,TMOD3,SSRP<br>1,FOXC1,TPX2,SRSF3,SEL1L,CASC5,TOB2,CCNG2,RNF4,PKD1,ZFR,CASP2,GNL3,TMPO,Paxip1,JTJ,CEP55,RFC3,INCENP,XRCC3,CHD4,MEIS2,NUMB,TA<br>OK1,BCAR1,Tpm2,Ppp1cc,SP1,PMF1/PMF1-<br>BGLAP,CIT,TCP1,ARSB,BLM,E2F8,TAF6,ATG10,PRKAR2A,MAPK9,ING3,USP1,XIAP,GNAI2,NUP62,LGALS1,MCM7 |

## Supplemental Table 7. General IPA functions for E2F1, E2F3A and E2F3B promoter targets

| ChIP-seq | Category                                   | B-H p-value | Genes                                                                                                                                                                                                                                                                                                                                                                                                                                                                                                                                                                                                                                                                                                                                                                                                                                                                                                                                                                                                                                                                                                                                                                                                                                                                                                                                                                                                                                                                                                                                                                                                                                                                                                                                                                                                                                                                                                                                                                                                                                                                                                                                                                                                                                                                                                                                                                                                                                                                                                                                                                                                                                                                                                                                                                  |
|----------|--------------------------------------------|-------------|------------------------------------------------------------------------------------------------------------------------------------------------------------------------------------------------------------------------------------------------------------------------------------------------------------------------------------------------------------------------------------------------------------------------------------------------------------------------------------------------------------------------------------------------------------------------------------------------------------------------------------------------------------------------------------------------------------------------------------------------------------------------------------------------------------------------------------------------------------------------------------------------------------------------------------------------------------------------------------------------------------------------------------------------------------------------------------------------------------------------------------------------------------------------------------------------------------------------------------------------------------------------------------------------------------------------------------------------------------------------------------------------------------------------------------------------------------------------------------------------------------------------------------------------------------------------------------------------------------------------------------------------------------------------------------------------------------------------------------------------------------------------------------------------------------------------------------------------------------------------------------------------------------------------------------------------------------------------------------------------------------------------------------------------------------------------------------------------------------------------------------------------------------------------------------------------------------------------------------------------------------------------------------------------------------------------------------------------------------------------------------------------------------------------------------------------------------------------------------------------------------------------------------------------------------------------------------------------------------------------------------------------------------------------------------------------------------------------------------------------------------------------|
| E2F1     | DNA Replication, Recombination, and Repair | 2.10E-26    | NPM1,POLA1,XRCC2,Ewsr1,SMARCB1,TSC2,SAFB,CCNE2,HCFC1,RFC1,TCF3,OGG1,RAD1,DAXX,EYA3,RAD18,TRIAP1,ECT2,FANCA,BAG6,PPIA,MTCH1,WRNIP1,SMARCA4,DIABLO,PELO,RBMX,ARHGAP19,ATN1,EXO1,HIST2H3D,POLG2,ENDOV,BUB1,MCM3,MSH2,MAZ,FBXO5,CDKN2A,KIF23,SOCS3,SMC1A,INTS3,E2F6,CHMP2A,ESCO2,SETD8,WEE1,DNA2,RAD54L,AURKA,CDCA2,OLA1,BCL2L1,DDA1,H3F3A/H3F3B,GINS1,POLL,CEP76,SF3B4,HIRIP3,POLD2,PPAT,KIAA0101,SKA2,BARD1,RNASEH2B,NEDD1,ZNF219,IQGAP1,E2F3,LSM2,HDGF,TRIP13,TACC3,LRRC40,RACGAP1,SMARCD1,BIRC5,PPM1G,FANCL,CENPI,CKS1B,BRCA2,ING1,MCM6,CCP110,CEP120,MTBP,PLRG1,RAN,mir-148,RBL1,FAN1,XRCC1,CHMP2B,TAOK2,DNMT1,PABPC1,HIRA,HMGA1,RNF168,CDAN1,SGOL1,NEK2,FYN,NCAPD3,CDT1,UVSSA,GPX1,CUL1,NRF1,STRA13,TRIO,HMGB2,CNTROB,EIF4G1,SF3B3,NEIL3,RINT1,CREB1,RFC2,ORC1,DUT,CEP152,TRIM28,SPC25,TIAL1,SMC6,PLCG1,PLK1,MDM2,NAP1L1,TSG101,NCAPG2,CDK1,RRM1,SENP1,MUM1,MMS19,CEP192,RBBP6,WDR48,PFN1,PRPF19,VPRBP,FBXW7,PBK,HIST1H4F,HIST1H4A,HIST1H4C,PPP1R7,STAG1,NCAPH,HIST1H4J,HIST1H3J,AAGAB,SNU13,HIST1H3F,STIL,GJA1,CASP3,POLE2,HIST1H3H,NUBP1,MTA2,RAC1,HERC2,PALB2,NASP,Cdc42,BRAT1,TIMEL,ESS,SMC2,UVRAG,CDK5RAP2,CDK2,BRD2,EXO2,GADD45G,SETDB2,MRE11A,SET,GMNN,CDCA5,IPO5,RASSF1,DNASE1L1,CALR,NRAS,UHRF1,SNRNPB,HAT1,PHLDA3,NCAPH2,PRMT1,DSCC1,RPS27L,MIS12,MYH10,RNF8,DSN1,SMC5,SLX1A/SLX1B,ODC1,STAG3,RUVBL2,UNG,TP53,TYMS,ASF1B,ESPL1,PCGF6,RRM2,CDCA4,SKP2,ATE1,HSPA8,SUPT16H,CCNF,BTG2,NEK4,XRCC5,FANCM,DEK,AKAP8,CDK4,SPRTN,PRPF4,BCL11B,NUF2,MMS22L,SPAG5,KSR1,CDKN3,HJURP,KIF2C,RAD21,DHX9,PRKDC,HNRNPU,GNA12,POLG,NCAPD2,SLC29A1,CCNE1,MEF2D,CDKN1A,VMP1,SPICE1,POLA2,UBTF,RAD51AP1,CASP7,DLGAP5,HELQ,MSH3,SLF2,RFWD3,SMC4,MYC,TGFBR2,RCC1,PIM1,FIGNL1,XPO1,CEP131,MYBL2,BRIP1,E4F1,HUWE1,SMC3,USP28,KANK2,KIF4A,ORC6,HELLS,BUB1B,PIAS4,TFAM,DUSP1,RECQL4,XRCC6,NDC80,MAD1L1,PIDD1,ARID1A,UBE2N,HIST2H4B,GTF3A,RAD50,RAD51,CDC25B,CCNA2,SHC1,FANCD2,NET1,RAD17,DNAJB1,MCM9,RPS3,SUDS3,LONP1,C10orf88,PRKCA,XRN2,TUBG1,FOXO1,PSME3,NBN,RPA2,FAM111A,MAPK14,KIF5B,RAD9A,MSH6,KIF18A,FANCI,CENPF,TGFBR3,CDC7,SFPQ,CDKN2C,CHAF1A,INTS7,TARDBP,IRS2,CENPJ,TIMP2,TIPIN,TOPBP1,FANCG,COPS5,SNAI1,RPA1,FANCC,RAD51D,CCNO,PTBP1,NSMCE2,BSG,GAB1,H2AFX,E2F1,MBD4,MSH5,CLSPN,HELB,MAPK7,CYR61,FN1,TCEA1,SUV39H2,ALKBH7,HMG1,CHEK1,ID1,YY1,MTOR,BANF1,ADK,TOP2A,EIF3A,CEBPA,E2F5,NAA60,MCPH1,POT1,ZWILCH,AIFM1,NUDCD3,DCK,CDC6,POLD1,SIN3A,FADD,KITLG,RAD54B,CHCHD3,SPDYA,SF3B2,mir-30,MCM2,CENPA,ASCC3,FEN1,RBPJ,HINFP,POLH,FZR1,ORC2,MCM8,ERCC6,MAPK1,AURKB,ROCK2,POLD3,WRN,PMS1,EZH2,PRND,NIPBL,INIP,RAD51C,BRCA1,KLF2,CDC25A,Ftx,KIF14,RBL2,STK11,MACROD1,SNRNP27,TBP,SSRP1,TPX2,CCNG2,RNF4,ARRB2,CASP2,BAZ1B,TMPO,Paxip1,INCENP,RFC3,OBFC1,XRCC3,ZBTB7A,CHD4,POLI,STXBP4,TAOK1,BCAR1,Ppp1cc,SP1,PMF1/PMF1-BGLAP,CIT,BLM,S1PR2,MAPK9,USP1,GNAI2,SMARCC1,LGALS1,MCM7 |

## Supplemental Table 7. General IPA functions for E2F1, E2F3A and E2F3B promoter targets

| ChIP-seq | Category                           | B-H p-value | Genes                                                                                                                                                                                                                                                                                                                                                                                                                                                                                                                                                                                                                                                                                                                                                                                                                                                                                                                                                                                                                                                                                                                                                                                                                                                                                                                                                                                                                                                                                                                                                                                                                                                                                                                                                                                                                                                                                                                                                                                                                                                                                                                                                                                                                                                                                                                                                                                                                                                                                                                                                                                                                                                                                                                                                                                                                                                                                                                                                                                                                                                                                                                                                                                                                                                                                                                     |
|----------|------------------------------------|-------------|---------------------------------------------------------------------------------------------------------------------------------------------------------------------------------------------------------------------------------------------------------------------------------------------------------------------------------------------------------------------------------------------------------------------------------------------------------------------------------------------------------------------------------------------------------------------------------------------------------------------------------------------------------------------------------------------------------------------------------------------------------------------------------------------------------------------------------------------------------------------------------------------------------------------------------------------------------------------------------------------------------------------------------------------------------------------------------------------------------------------------------------------------------------------------------------------------------------------------------------------------------------------------------------------------------------------------------------------------------------------------------------------------------------------------------------------------------------------------------------------------------------------------------------------------------------------------------------------------------------------------------------------------------------------------------------------------------------------------------------------------------------------------------------------------------------------------------------------------------------------------------------------------------------------------------------------------------------------------------------------------------------------------------------------------------------------------------------------------------------------------------------------------------------------------------------------------------------------------------------------------------------------------------------------------------------------------------------------------------------------------------------------------------------------------------------------------------------------------------------------------------------------------------------------------------------------------------------------------------------------------------------------------------------------------------------------------------------------------------------------------------------------------------------------------------------------------------------------------------------------------------------------------------------------------------------------------------------------------------------------------------------------------------------------------------------------------------------------------------------------------------------------------------------------------------------------------------------------------------------------------------------------------------------------------------------------------|
| E2F1     | Cellular Assembly and Organization | 9.12E-22    | NPM1,KIF13B,AXIN1,POLA1,NUP133,PALM,XRCC2,GLB1,AJUBA,SMARCB1,TSC2,MAP1A,SAFB,ETS1,GRK4,HCFC1,CRKL,NUP107,SP4,DAXX,RAD18,TINF2,NPHP3,ECT2,BAG6,GNA11,GAK,HEXA,NUAK2,SMARCA4,PELO,PIK3C3,ARHGAP19,ATN1,EXO1,HIST2H3D,POLG2,BBIP1,BUB1,KPNB1,TMEM107,FBXO5,AP1G1,CDKN2A,KIF23,MPRIIP,LHX2,YWHAH,MICALL2,RPGRIP1L,SMC1A,INTS3,CTSD,CHMP2A,ESCO2,SMG6,WEE1,DNA2,CEP68,RAD54L,AURKA,CDCA2,PTPRM,OLA1,BCL2L1,H3F3A/H3F3B,CEP76,COMMD1,NAGLU,HIRIP3,MAST3,ABCD1,DZIP1L,HPS5,RND1,KIZ,KIAA0101,RAB23,SKA2,BARD1,NEDD1,CSR1,CLUAP1,IQGAP1,PTGES3,HDGF,TRIP13,TACC3,IPO4,RACGAP1,SMARCE1,NFATC4,BIRC5,ALS2,KLF5,BRCA2,ING1,CCP110,RAB5C,CEP120,MTBP,DSTN,RAN,PCDHGC3,POU3F2,Cyb5r3,RBL1,HOOK3,CD2AP,CHMP2B,CBFB,SPECC1L,TAOK2,RFX3,DNMT1,SEPT7,YWHAZ,SLC17A5,CKAP2,JUNB,ZMYM6,RAB31,DCTN6,RNF168,CDAN1,RTN4,SGOL1,NEK2,HAUS6,FYN,NCAPD3,CDT1,BTG3,LEMD2,CUL1,TMEM11,EMP2,TSGA10,NRF1,TRIO,HMGB2,CNTR0B,AKAP11,RINT1,CC2D1A,CREB1,VCL,TCTN3,RGMB,NUP85,CEP164,MCMBP,CEP152,PDE4DIP,SPC25,SMC6,PLK1,MDM2,F3,TSG101,NCAPG2,CDK1,SENP1,CEP72,ATL2,MUM1,MMS19,CEP192,NCAM1,CLUH,FMNL3,PFN1,FARP1,ARF1,WasI,UNC5B,MNS1,FBXW7,HIST1H4F,HIST1H4A,HIST1H4C,PPP1R7,STAG1,FASN,NCAPH,MID1IP1,HIST1H3J,HIST1H4J,HIST1H3F,Nolc1,GJA1,STIL,CASP3,HIST1H3H,NUBP1,MTA2,RAC1,MAPK8IP3,RALBP1,PALB2,NASP,Cdc42,ERP29,SMC2,UVRAG,CDK5RAP2,CDK2,KDM3A,BRD2,SETDB2,TMEM216,MRE11A,IPO9,GMNN,PHGDH,CDCA5,SORBS3,IFRD1,RASSF1,CALR,PAK4,NRAS,UHRF1,PANK2,SURF6,DOCK7,UBE3A,PRMT1,NCAPH2,SYNE3,MIS12,MYH10,RNF8,MYH9,SCLT1,DSN1,SMC5,Ubb,HAUS4,C21orf2,STK35,SLC9A1,Tmsb4x (includes others),Diap2,MRPL10,STAG3,RUVBL2,TP53,ASF1B,TUBGCP3,ESPL1,PCGF6,APPL2,SEMA5A,TPM3,MDM1,SKP2,HSPA8,FBXW8,CCNF,FSCN1,BTG2,GAPDH,PARD3,XRCC5,STRIP2,FANCM,DEK,PEX3,PLXNA3,CDK4,DNAJC13,CKAP4,BCL11B,NUF2,GAS2L3,MMS22L,LBR,KSR1,SPAG5,B4GALT7,ARF6,MAP4,TIM27,TP53INP2,ALMS1,DAB2,HJURP,KIF2C,RAD21,DHX9,PRKDC,MAPRE1,GNA12,CUL7,TDRKH,NCAPD2,LAMB2,PES1,CCNE1,CDKN1A,DOPEY2,SH2B2,SPICE1,PLEKHA1,CEP41,AKAP1,MAOA,DLGAP5,NCDN,RFWD3,SMC4,TIMM50,PEX11B,BAG3,TLN1,TGFBR2,MYC,IFT140,STK4,LEMD3,RHOB,RCC1,PIM1,PACS2,XPO1,CEP131,CLASP1,SMC3,SYNE2,KANK2,KIF4A,ORC6,HELLS,RBFOX2,BUB1B,SLC3A2,PIP5K1A,RFX4,CBX1,TFAM,PIAS4,MATN2,XRCC6,MAD1L1,NDC80,LMNB2,HSP90AA1,Gm15807/Hmgn5,INPP5K,ACTN4,RBBP4,TMEM138,ARID1A,UBE2N,HIST2H4B,RAD50,HNRNPK,CDC25B,RAD51,CCNA2,SHC1,FANCD2,NET1,OPA1,TOR1B,RPS3,SUDS3,MCM9,LONP1,ARC,PRKCA,ARHGAP33,CAPZB,HAUS8,SLC9A3R1,TUBG1,EMD,CANX,FOXO1,ATL3,GAN,RPA2,NBN,PRKCI,MAPK14,RAD9A,KIF5B,EHD4,CEP70,KIF18A,CENPF,TOR1A,CDC7,SFPQ,PHACTR4,RICTOR,CHAF1A,EZR,TARDBP,CEP250,CENPJ,MEX3C,NDRG1,FANCG,RPA1,FANCC,RAD51D,CCNO,NR1D1,GAB1,BSG,H2AFX,E2F1,HPRT1,LRP8,CYR61,FN1,SUV39H2,WWTR1,HMGN1,CHEK1,ID1,YY1,MTOR,ACAP2,CEBPA,TOP2A,NAA60,PRKCE,MAP1LC3A,MCPH1,TBCD,FAM109A,POT1,AIFM1,RPS19,FMN1,NUDCD3,LETM1,ACTB,CDC6,TOR1AIP2,KITLG,CHCHD3,ZNF516,MCM2,KIF20B,CENPA,ADAM10,SEPT2,ZMYM4,FZR1,MCM8,ERCC6,PTPN23,MAPK1,DIAPH3,TUBB,AURKB,LMNB1,STMN1,ROCK2,WRN,LPAR2,NIPBL,HTRA2,INIP,BRCA1,ARHGAP24,DLG1,KLF2,FARP2,SSNA1,Ftx,KIF14,RBL2,NUP155,ULK4,STK11,RAB8A,RANBP1,TMOD3,SSRP1,FOXC1,BAG4,TPX2,RNF4,CCNG2,PKD1,CORO1B,SNX1,BAZ1B,KATNB1,INCENP,OBFC1,GDI1,XRCC3,NFIX,CHD4,Pcnt,COX10,PKM,NUMB,RAPGEF6,TAOK1,BCAR1,ROR2,SP1,PMF1/PMF1-BGLAP,CIT,ARSB,RHOF,BLM,ACTN1,S1PR2,MAPK9,GCC2,XIAP,GNAI2,KIF24,LPAR1,DYM,PJA2,NUP62,RTN3,WNT5A |

## Supplemental Table 7. General IPA functions for E2F1, E2F3A and E2F3B promoter targets

| ChIP-seq | Category        | B-H p-value | Genes                                                                                                                                                                                                                                                                                                                                                                                                                                                                                                                                                                                                                                                                                                                                                                                                                                                                                                                                                                                                                                                                                                                                                                                                                                                                                                                                                                                                                                                                                                                                                                                                                                                                                                                                                                                                                                                                                                                                                                                                                                                                                                                                                                                                                                                                                                                                                                                                                                                                                                                                                                                                                                                                                                                                                                                                                                                                                                                                                                                                                                                                                                                                                                                                                                                                                                                                                                                                                                                                                                                    |
|----------|-----------------|-------------|--------------------------------------------------------------------------------------------------------------------------------------------------------------------------------------------------------------------------------------------------------------------------------------------------------------------------------------------------------------------------------------------------------------------------------------------------------------------------------------------------------------------------------------------------------------------------------------------------------------------------------------------------------------------------------------------------------------------------------------------------------------------------------------------------------------------------------------------------------------------------------------------------------------------------------------------------------------------------------------------------------------------------------------------------------------------------------------------------------------------------------------------------------------------------------------------------------------------------------------------------------------------------------------------------------------------------------------------------------------------------------------------------------------------------------------------------------------------------------------------------------------------------------------------------------------------------------------------------------------------------------------------------------------------------------------------------------------------------------------------------------------------------------------------------------------------------------------------------------------------------------------------------------------------------------------------------------------------------------------------------------------------------------------------------------------------------------------------------------------------------------------------------------------------------------------------------------------------------------------------------------------------------------------------------------------------------------------------------------------------------------------------------------------------------------------------------------------------------------------------------------------------------------------------------------------------------------------------------------------------------------------------------------------------------------------------------------------------------------------------------------------------------------------------------------------------------------------------------------------------------------------------------------------------------------------------------------------------------------------------------------------------------------------------------------------------------------------------------------------------------------------------------------------------------------------------------------------------------------------------------------------------------------------------------------------------------------------------------------------------------------------------------------------------------------------------------------------------------------------------------------------------------|
| E2F1     | Gene Expression | 1.13E-21    | RNF139,NPM1,AXIN1,POLA1,GSK3A,POR,EIF3B,AJUBA,TSC2,SMARCB1,WWOX,TCERG1,SAFB,SARNP,ETS1,HCFC1,NKIRAS2,RANBP3,RFC1,ZBTB5,TCF3,OGG1,SP4,DAXX,TRIP1,ECT2,EIF3K,PRDX4,PPIA,SMARCA4,TIPARP,KDM6A,RBMX,ATN1,GTF2H3,KHDRBS1,DHX36,NCBP1,ARID3A,NR1D2,MSH2,MAZ,WBP2,RPL37,TFB1M,CDKN2A,SOCS3,LHX2,YWHAH,SFMBT1,ZFP36L1,CBX5,E2F6,MATR3,JUND,SETD8,RAD54L,BAMBI,LZTR1,PHRF1,CAND1,H3F3A/H3F3B,POLR2E,FOXP4,LITAF,KLF10,PIAS1,RNASEH2B,ZNF219,ZNF226,E2F3,IQGAP1,PDCD10,PTGES3,HGDF,TOM1L1,STUB1,WDTA1,TRIP13,GTF3C4,SMARCE1,NFATC4,BIRC5,HTATS1,E2F7,KLF5,BRCA2,BRPF1,ING1,UBR2,GTF2E2,POU3F2,RBL1,EEF1D,CTDSP1,SNIP1,CBFB,RFX3,DNMT1,CNOT1,HIRA,YWHAZ,MTF2,CKAP2,JUNB,MBD2,HMGA1,MED12,EAPP,ARHGAP35,FYN,SNAI2,GSTM5,BTG3,CUL1,GPX1,POLR2J,STRA13,NRF1,HMGB2,EIF4G1,H2AFZ,RNPS1,CC2D1A,CREB1,TRIM16,HMG20A,PSPC1,RGMB,BANP,SUZ12,TRIM28,PLCG1,TIAL1,PLK1,MDM2,NAP1L1,TRIM37,TSG101,CDK1,SENP1,MORF4L2,CDC85B,MMS19,RBBP6,NCAM1,PFN1,Klf16,VPRBP,FBXW7,YWHAQ,MID1IP1,FOSL2,MCM5,GJA1,HSPA9,MTA2,RAC1,RALBP1,Cdc42,WHSC1L1,ERP29,TI MELESS,SBNO2,CDK2,CDK5RAP2,CREBL2,KDM3A,BRD2,PA2G4,GADD45G,MRE11A,ZMIZ1,SET,ZFP90,GTF2B,TRIM24,POLR2A,NFYA,GMNN,PHGDH,SO RBS3,IFRD1,YLPM1,DHX15,RASSF1,CALR,DAP,MYCBP,NRAS,Bhlhe41,UHRF1,TCF7L1,UBE3A,ZNF382,PIAS3,FAF1,RPS4Y1,PTPRU,NR1H2,HIVEP1,RPS27L,CBFA2T2,EIF3L,LANCL2,RNF8,MAGED1,SLC9A1,ODC1,CABIN1,Tmsb4x (includes others),EGR2,Diap2,MPHOSPH8,FBLN1,ETF1,ATF4,RUVBL2,TARBP2,IQGAP3,MAP3K2,TP53,APPL2,PCGF6,KLF13,CDCA4,NDNL2,HSPA8,EIF4H,CNOT7,SUPT16H,MRPL17,BTG2,BBS7,NEK4,GAPDH,SUMO2,HIST1H1D,PARD3,Zfp568,RBM39,XRCC5,DEK,HNRNPA2B1,CTDSPL,BCL11B,MED28,HOXC9,LRRFIP1,RITA1,OGT,IRF2BP1,TRIM27,TP53INP2,SOS1,DAB2,JADE1,BTAF1,CDC5L,NFE2L2,RAD21,DHX9,PRKDC,HNRNPU,N4BP2L2,PPP2R5D,GNA12,MRPL12,PO LG,MLF1,HNRNPD,ST3GAL3,Zfp53,CCNE1,GTF2H4,MEF2D,MBD3,CDKN1A,TCF19,LBH,UBTF,MAP3K3,ILF3,MAP3K11,GNB2L1,NFATC2IP,RARG,AP2A2,MY C,TGFBR2,LEMD3,STK4,ZHX1,RHOB,PIM1,EIF3D,PPP3R1,XPO1,MYBL2,BRIP1,E4F1,KLF11,TAB1,ITGB3BP,EIF4B,SMC3,NBEAL2,PELP1,GABPB2,KANK2,ZNF706,HELLS,RBFOX2,BRD8,ATAD2,KMT2A,RFX4,GMEB2,HNRNPAB,TAF1,CBX1,PIAS4,TFAM,MLXIP,DUSP1,XRCC6,MAD1L1,Gm15807/Hmgn5,FZD5,AC TN4,INPP5K,ZGPAT,ARID1A,UBE2N,GTF2I,ABCF1,TAF7,GTF3A,GTF2A1,IGF2BP1,HNRNPK,MIER1,CDC25B,CCNA2,SHC1,SP3,NAMPT,DNAJB1,SUDS3,RP S3,PRKCA,TAF12,SLC20A1,ENY2,RFX1,RPRD1B,DRG1,TUBG1,PRDM4,SENP2,FOXO1,PSME3,NBN,PRKCI,MAPK14,PHF19,RAD9A,SNAPC2,SLC19A2,WF S1,GZF1,CENPF,MZF1,PCGF2,GTF3C2,TGFBR3,SOX12,CDKN2C,SFPQ,HES1,RICTOR,CHAF1A,NCOA7,MXD3,ZNF367,THRAP3,MTF1,EZR,TARDBP,MED21,Zfp748,HEY2,CENPJ,TOBP1,COPS5,SNAI1,NUFIP1,RPA1,PTBP1,GAB1,NR1D1,ZNF202,H2AFX,E2F1,GNB2,AHCTF1,LRP8,HELB,MAPK7,CYR61,L3MBTL2,HIST1H1C,AZI2,FN1,TCEA1,ATF7,WWTR1,SUV39H2,HMGN1,ZNF143,SP2,SGMS1,SLBP,WTAP,ID1,MTOR,YY1,DHPS,DAP3,TOP2A,E2F5,CEBPA,SOCS2,PRKCE,HEXIM1,RXR, SARS, GLMN, RQCD1, DLX1, SIN3A, KITLG, FADD, CHCHD3, ZNF516, mir-30, LIMS1, NOP2, Rbmxl1, RBPJ, SUPT3H, ZFP36L2, HINFP, FZD7, TAF15, BIRC2, SND1, ORC2, ERCC6, MAPK1, TFG, NR2F2, FNIP2, AURKB, LOC102724828/MRPL23, ROCK2, FGFR3, NCOA5, WRN, LPAR2, ASXL2, EZH2, UCHL5, SIAH2, NIPBL, PUF60, BRCA1, CIPC, KLF2, SFR1, RBL2, NONO, GPS2, STK11, TBP, EIF2S3, SNW1, FOX C1, SSRP1, Scaf1, EPRS, RNF4, ARRB2, PKD1, LCORL, EIF4A3, NFYC, TMPO, TAGLN2, ZBTB7A, NFIX, MED23, CHD4, PKM, MEIS2, TNFAIP3, PRKAG1, ROR2, NFX1, NLK, ZBED3, SP1, PMF1/PMF1-BGLAP, MAML3, ATF6B, RBM15, BLM, NFYB, E2F8, NACA, TAF6, RPL30, MAPK9, RPS6KA5, NFKBIZ, XIAP, HIVEP2, AFF1, ZBTB48, PBX3, LPAR1, NUP62, SMARCC1, WNT5A, LGALS1, MCM7 |



## Supplemental Table 7. General IPA functions for E2F1, E2F3A and E2F3B promoter targets

| ChIP-seq | Category                          | B-H p-value | Genes                                                                                                                                                                                                                                                                                                                                                                                                                                                                                                                                                                                                                                                                                                                                                                                                                                                                                                                                                                                                                                                                                                                                                                                                                                                                                                                                                                                                                                                                                                                                                                                                                                                                                                                                                                                                                                                                                                                                                                                                                                                                                                                                                                                                                                                                                                                                                                                                                                                                                                                                                                                                                                                                                                                                                                                                                                                                                                                                                                                                                                                                                                                                                                                                                                                                                                                                                                                                                                                                                                                                                                                                                                                                                                                                                                                                                                                                                                                                                                                                                                                                                                                                                                                                                                                                                                                                                                                                                                                                                                                                                                                                                                                                             |
|----------|-----------------------------------|-------------|-----------------------------------------------------------------------------------------------------------------------------------------------------------------------------------------------------------------------------------------------------------------------------------------------------------------------------------------------------------------------------------------------------------------------------------------------------------------------------------------------------------------------------------------------------------------------------------------------------------------------------------------------------------------------------------------------------------------------------------------------------------------------------------------------------------------------------------------------------------------------------------------------------------------------------------------------------------------------------------------------------------------------------------------------------------------------------------------------------------------------------------------------------------------------------------------------------------------------------------------------------------------------------------------------------------------------------------------------------------------------------------------------------------------------------------------------------------------------------------------------------------------------------------------------------------------------------------------------------------------------------------------------------------------------------------------------------------------------------------------------------------------------------------------------------------------------------------------------------------------------------------------------------------------------------------------------------------------------------------------------------------------------------------------------------------------------------------------------------------------------------------------------------------------------------------------------------------------------------------------------------------------------------------------------------------------------------------------------------------------------------------------------------------------------------------------------------------------------------------------------------------------------------------------------------------------------------------------------------------------------------------------------------------------------------------------------------------------------------------------------------------------------------------------------------------------------------------------------------------------------------------------------------------------------------------------------------------------------------------------------------------------------------------------------------------------------------------------------------------------------------------------------------------------------------------------------------------------------------------------------------------------------------------------------------------------------------------------------------------------------------------------------------------------------------------------------------------------------------------------------------------------------------------------------------------------------------------------------------------------------------------------------------------------------------------------------------------------------------------------------------------------------------------------------------------------------------------------------------------------------------------------------------------------------------------------------------------------------------------------------------------------------------------------------------------------------------------------------------------------------------------------------------------------------------------------------------------------------------------------------------------------------------------------------------------------------------------------------------------------------------------------------------------------------------------------------------------------------------------------------------------------------------------------------------------------------------------------------------------------------------------------------------------------------------------|
| E2F1     | Cellular Growth and Proliferation | 7.40E-21    | RNF139,NPM1,AXIN1,POLA1,PALM,FRMD6,GSK3A,POR,XRCC2,EIF3B,GLB1,AJUBA,TSC2,SMARCB1,WWOX,SAFB,AHCY,ETS1,RGS19,CCNE2,PEAK1,NKI RAS2,CRKL,RFC1,ZBTB5,TCF3,OGG1,DAXX,RAD18,ALCAM,TINF2,ELMO2,ECT2,FANCA,PIM3,GADD45B,mir-331,BAG6,PRDX4,GNA11,GAK,PPIA,MTCH1,SMARCA4,FXR2,DIABLO,RABL6,PELO,KDM6A,PIK3C3,KHDRBS1,GAS1,TUBB4B,IGF2R,ARID3A,MCM3,BUB1,MSH2,MAZ,WBP2,TOE1,ACTL6A,KIF23,CDKN2A,SOCS3,MPRIIP,MICALL2,ZFP36L1,RSL1D1,RPGRIP1L,RGPD4 (includes others),SMC1A,CD164,E2F6,CTSD,JUND,SETD8,WEE1,BAMBI,AURKA,PTPRM,CDCA2,BCL2L1,H3F3A/H3F3B,mir-210,POLL,PPAT,ALG14,SUMO3,LITAF,RND1,KIAA0101,KLF10,PIAS1,BARD1,RNASEH2B,CSR1,GPHN,IQGAP1,E2F3,PDCD10,SEMA4C,PTGES3,TOM1L1,HDGF,STUB1,NDUFV1,TACC3,RACGAP1,SMARCE1,NFATC4,G3BP1,STK3,ALS2,BIRC5,PPM1G,FANCL,E2F7,KLF5,CKS1B,BRCA2,BRPF1,ING1,SLC25A5,E FEMP2,HNRNPL,CEP120,MTBP,mir-148,RAN,POU3F2,RBL1,EEF1D,HIST1H2AB,XRCC1,CD2AP,PTP4A2,URGCP,SNIP1,CBFB,DNMT1,GET4,Irx5,ANGPTL6,YWHAZ,MTF2,MBD2,HMGA1,JUNB,S SR1,SH3GL1,EAPP,RTN4,CDK19,NEK2,FYN,SNAI2,BTG3,CDT1,B3GNT2,LEMD2,EMP2,CUL1,GPX1,POLR2J,STRA13,NRF1,TRIO,HMGB2,EIF4G1,SF3B3,H2 AFZ,GPR3,NEIL3,HK2,CREB1,TXNL1,VCL,FKBP5,ORC1,WSB1,PPIF,SUZ12,HDGFRP2,TRIM28,USPL1,TIAL1,PLCG1,MDM2,PLK1,NAP1L1,SCAF11,COPS3,T SG101,F3,DUSP14,CDK1,RRM1,SENP1,CCDC85B,CIRBP,GCAT,RBBP6,NCAM1,WDR48,PRPF19,PFN1,VPRBP,ARF1,Wasl,UNC5B,FBXW7,AMD1,PBK,YWH AQ,STAG1,FASN,AAGAB,FOSL2,MCM5,STIL,GJA1,CASP3,HSPA9,NUBP1,MTA2,RAC1,BIRC6,CDC123,NDUFAF2,MAT2B,RALBP1,CMC2,HERC2,Cdc42,NAS P,BRAT1,TIMELESS,RPS15A,UVRAG,CDK2,FADS1,KDM3A,SH3BP4,SPRED1,PA2G4,GADD45G,TXLNA,MRE11A,DTYMK,ZMIZ1,SET,UHRF2,GTF2B,TRIM24 ,NFYA,GMNN,SIPA1,OAZ1,Pvr,CDCA5,GTPBP1,DHX15,RASSF1,EXOSC2,CALR,DAP,PAK4,MYCBP,NRAS,Bhlhe41,UHRF1,HAT1,SURF6,DOCK7,UBE3A,MT AP,PRMT1,PIAS3,TMEM2,NR1H2,PTPRU,Sf1,MYH10,MAGED1,MYH9,SCLT1,RASL10A,DNAJC3,SLC9A1,ODC1,C6orf89,RCL1,Tmsb4x (includes others),EGR2,FBLN1,COPS6,ATF4,RUVBL2,MGAT1,MAP3K2,GNE,TYMS,TP53,PDIA5,ESPL1,APPL2,SEMA5A,RRM2,TPM3,SCAMP4,KLF13,CDCA4,SKP2,HS PA8,NDNL2,FBXW8,MICU1,EIF4H,CNOT7,CCNF,FSCN1,BTG2,FADS2,ANAPC5,GAPDH,HIST1H1D,TFRC,SUMO2,ATP6V0E1,XRCC5,PRDX2,PLXNA3,HNRN PA2B1,CDK4,CTDSPL,BCL11B,HOXC9,MED28,LRRFIP1,LBR,KSR1,CDKN3,OGT,B4GALT7,ARF6,TRIM27,ALMS1,SOS1,DAB2,KIF2C,NFE2L2,RAD21,DHX9,P RKDC,PHF6,MEMO1,HNRNPU,GNA12,MAPRE1,CUL7,POLG,HNRNPD,SLC29A1,LAMB2,PES1,CCNE1,TUBA1A,AIMP2,MEF2D,SH2B2,MBD3,EIF4A1,CDKN1 A,CCT7,VMP1,SHMT1,TCF19,PLEKHA1,MSRA,UBTF,MAP3K3,PPIL1,CASP7,MAOA,DLGAP5,ILF3,NCDN,MAP3K11,MSH3,GNB2L1,TLN1,NUDC,RARG,MYC, TGFBR2,LEMD3,STK4,FDFT1,SAE1,RHOB,PIM1,PPP3R1,FAM83B,FIGNL1,PDCD6,CEP131,MYBL2,CNOT6,BRIP1,E4F1,KLF11,EIF4B,HUWE1,PGK1,HNRNP F,USP28,SMC3,PELP1,GABPB2,KANK2,PNN,RBFOX2,HELLS,BUB1B,SNX3,TUSC3,ATAD2,KMT2A,SLC3A2,CBLB,PIP5K1A,HNRNPAB,TFAM,CBX1,GCNT1, GIPC1,DUSP1,RC3H1,RECQL4,CDCA7L,XRCC6,LMNB2,HSP90AA1,MAD1L1,FZD5,SYN3,INPP5K,FAM83D,ACTN4,PIDD1,RBBP4,RPSA,B2M,DCBLD2,ZGPA T,ARID1A,UBE2N,GTF2I,MCFD2,TAF7,RAD50,IGF2BP1,HNRNPK,MIER1,CDCA7,CDC25B,TRA2A,RAD51,CCNA2,SHC1,SP3,FANCD2,NET1,NOP58,RAD17,O PA1,NAMPT,STX4,DNAJB1,MCM9,LONP1,PRKCA,ARHGAP33,SLC20A1,NDUFAF4,SDC1,RFX1,SLC9A3R1,RPRD1B,XRN2,CHERP,PRDM4,EMD,SENP2,CN OT8,MTHFD1,FOXO1,PSME3,HNRNPM,NBN,PDAP1,CISD1,MAPK14,PRKCI,CACUL1,RAD9A,EHD4,WNK1,KIF18A,CENPF,MZF1,PCGF2,ARV1,TGFBR3,CDC 7,SFPQ,CDKN2C,ZNF451,ERI1,HES1,RICTOR,NEU1,RUSC1,MXD3,THRAP3,EZR,TARDBP,HADHB,KARS,OSMR,IRS2,HEY2,APEX2,CENPJ,THEM4,TIMP2,H NRNPA0,TIPIN,NDRG1,TOBP1,COPS5,SNAI1,RPA1,FANCC,CTPS1,C9orf69,CCNO,PLA2G6,PTBP1,NR1D1,VKORC1,RFC4,GAB1,BSG,YARS,H2AFX,E2F1, CHKA,HPRT1,RGL2,CLSPN,MAPK7,CYR61,YEATS4,CAPZA1,VASH2,ADAM17,FN1,DUSP6,WVTR1,ZNF143,HMGN1,NUP214,RTKN2,CAMK2N2,SP2,TAX1B P3,SGMS1,CHEK1,WTAP,TRIB1,ID1,YY1,MTOR,DHPS,ADK,DGCR8,TOP2A,DAP3,E2F5,EIF3A,CEBPA,NAA60,PRKCE,SOCS2,STIM1,MCPH1,HNRNPH2,HE XIM1,RXR2,POT1,GLMN,AIFM1,RPS19,NUDCD3,DCK,ACTB,CDC6,SIN3A,FADD,KITLG,KIF15,SF3B2,SPDYA,mir-30,MCM2,RBM6,LIMS1,KIF20B,NOP2,ASCC3,CENPA,ADAM10,RBPJ,FEN1,DNPH1,ZFP36L2,SCAMP3,FZD7,POLH,BIRC2,FZR1,SND1,MCM8,OSTF1,ERCC6, TFG,MAPK1,INSIG1,NR2F2,TUBB,AURKB,LMNB1,ROCK2,FGFR3,STMN1,NCOA5,SRSF1,SIVA1,WRN,LPAR2,EZH2,DLST,BRCA1,ARHGAP24,KLF2,DLC1,Fu s, CDC25A,ATP5G2,KIF14,CDC37,RBL2,GPS2,CCDC134,STK11,TBP,PSMC4,RAB8A,RANBP1,SNW1,FOXC1,BAG4,TPX2,SRSF3,SEL1L,TOP1MT,ARRB2,TO B2,RNF4,CCNG2,CORO1B,PKD1,CASP2,SNX1,PTPRS,EXTL3,GNL3,AK2,TMPO,Paxip1,JTB,YTHDF2,CMC4,TAGLN2,RFC3,XRCC3,ZBTB7A,NFIX,CHD4,PKM ,NUMB,PPP1CB,TNFAIP3,STXB4,NAA10,Tpm2,BCAR1,ROR2,HSP90B1,HNRNPR,SP1,PCK2,MANF,MAML3,TCP1,LTBP4,RBM15,BLM,ACTN1,E2F8,NACA,N DUFAF3,TAF6,S1PR2,ATG10,PRKAR2A,MAPK9,RPS6KA5,USP1,FDXR,XIAP,AFF1,ZBTB48,GNAI2,EXOC4,PBX3,LPAR1,PJA2,NUP62,PAQR4,HMGCR,SHMT 2,MCM7,LGALS1,WNT5A |

## Supplemental Table 7. General IPA functions for E2F1, E2F3A and E2F3B promoter targets

| ChIP-seq | Category                | B-H p-value | Genes                                                                                                                                                                                                                                                                                                                                                                                                                                                                                                                                                                                                                                                                                                                                                                                                                                                                                                                                                                                                                                                                                                                                                                                                                                                                                                                                                                                                                                                                                                                                                                                                                                                                                                                                                                                                                                                                                                                                                                                                                                                                                                                                                                                                                                                                                                                                                                                                                                                                                                                                                                                                                                                                                                                                                                                                                                                                                                                                                                                                                                                                                                                                                                                                                                                                                                                                                                                                                                                                                                                                                                                                                                                                                                                                                                                                                                                                                                                                                                                                                                                                                                                                                                                                                                                                                                                                                                                                                                                          |
|----------|-------------------------|-------------|----------------------------------------------------------------------------------------------------------------------------------------------------------------------------------------------------------------------------------------------------------------------------------------------------------------------------------------------------------------------------------------------------------------------------------------------------------------------------------------------------------------------------------------------------------------------------------------------------------------------------------------------------------------------------------------------------------------------------------------------------------------------------------------------------------------------------------------------------------------------------------------------------------------------------------------------------------------------------------------------------------------------------------------------------------------------------------------------------------------------------------------------------------------------------------------------------------------------------------------------------------------------------------------------------------------------------------------------------------------------------------------------------------------------------------------------------------------------------------------------------------------------------------------------------------------------------------------------------------------------------------------------------------------------------------------------------------------------------------------------------------------------------------------------------------------------------------------------------------------------------------------------------------------------------------------------------------------------------------------------------------------------------------------------------------------------------------------------------------------------------------------------------------------------------------------------------------------------------------------------------------------------------------------------------------------------------------------------------------------------------------------------------------------------------------------------------------------------------------------------------------------------------------------------------------------------------------------------------------------------------------------------------------------------------------------------------------------------------------------------------------------------------------------------------------------------------------------------------------------------------------------------------------------------------------------------------------------------------------------------------------------------------------------------------------------------------------------------------------------------------------------------------------------------------------------------------------------------------------------------------------------------------------------------------------------------------------------------------------------------------------------------------------------------------------------------------------------------------------------------------------------------------------------------------------------------------------------------------------------------------------------------------------------------------------------------------------------------------------------------------------------------------------------------------------------------------------------------------------------------------------------------------------------------------------------------------------------------------------------------------------------------------------------------------------------------------------------------------------------------------------------------------------------------------------------------------------------------------------------------------------------------------------------------------------------------------------------------------------------------------------------------------------------------------------------------------------------|
| E2F1     | Cell Death and Survival | 8.21E-21    | NPM1,AXIN1,GSK3A,FRMD6,POR,XRCC2,Ewsr1,EIF3B,TSC2,SMARCB1,WWOX,VAMP3,TCERG1,SAFB,ETS1,GRK4,CRKL,RFC1,TCF3,OGG1,RAD1,DAXX,EYA3,RAD18,ALCAM,TRIAP1,ECT2,NDST1,FANCA,PIM3,Calm1 (includes others),GADD45B,mir-331,PRDX4,BAG6,GNA11,PPIA,MTCH1,NUAK2,SMARCA4,DIABLO,RABL6,PIK3C3,EXO1,ATN1,SDHA,KHDRBS1,GAS1,IGF2R,BUB1,KPNB1,TMEM107,MSH2,FBXO5,RPL37,TFB1M,AP1G1,ACTL6A,CDKN2A,SOCS3,MPRIP,PCDH18,YWHAH,LHX2,ZFP36L1,NUP58,RSL1D1,CBX5,SMC1A,RGPD4 (includes others),INTS3,CTSD,CD164,E2F6,AK1,CHMP2A,MPHOSPH9,COQ6,SNRPD1,SNN,JUND,WDR4,SETD8,STXBP1,WEE1,ASNA1,BAMBI,RAD54L,AURKA,PTPRM,CDCA2,BCL2L1,GINS1,POLL,mir-210,NAGLU,SLC25A10,PPAT,ABCD1,KIAA0101,KLF10,BARD1,PIAS1,GPHN,IQGAP1,TEX10,E2F3,PDCD10,PTGES3,HDGF,STUB1,WBP1,TACC3,RACGAP1,ALKBH5,SMARCE1,HERPUD1,SMARCD1,NFATC4,STK3,ALS2,BIRC5,PPM1G,FANCL,TMEM109,TUBB6,CENPI,E2F7,KLF5,BRCA2,ING1,SLC25A5,RPLP0,CCP110,MTBP,PLRG1,UBR2,RAN,mir-148,PCDHGC3,MDH1,Cyb5r3,RBL1,EEF1D,XRCC1,CD2AP,PTP4A2,CBFB,TAOK2,DNMT1,YWHAZ,SLC17A5,CKAP2,HMGA1,JUNB,RTN4,ARHGAP35,CDK19,NEK2,FYN,SNAI2,GSTM5,BTG3,CDT1,GPX1,EMP2,CUL1,BOK,NRF1,HMGB2,EIF4G1,SF3B3,MCOLN1,STOM,HK2,RNPS1,RINT1,CC2D1A,CREB1,NUP205,VCL,FKBP5,NSMCE1,WSB1,RGMB,DUT,SUZ12,PPIF,TRIM28,SPC25,TIAL1,PLCG1,MDM2,PLK1,F3,C1orf159,TSG101,DUSP14,NCAPG2,CDK1,RRM1,SEN1,CTNBNB1,CIRBP,GPR180,RBBP6,NCAM1,WDR48,PFN1,PRPF19,VPRBP,UNC5B,FBXW7,PBK,YWHAQ,STAG1,FASN,ITPRIP,SLC25A23,FOSL2,BCKDK,P4HB,STIL,GJA1,CASP3,DDX19A,HSPA9,BIRC6,RAC1,MTA2,RALBP1,PALB2,Cdc42,BRAT1,HNRNPUL2,TBCCD1,CDK2,CREBL2,KDM3A,BRD2,EXO2,PA2G4,GADD45G,HIGD1A,MRE11A,MRPS30,DTYMK,SET,TRIM24,MAN2C1,UHRF2,POLR2A,NFYA,GMNN,ZNF280B,OAZ1,Pvr,IFRD1,RASSF1,DNASE1L1,CALR,PAK4,DAP,NRAS,UHRF1,HAT1,PHLDA3,AVP1,TCF7L1,UBE3A,PRMT1,FAF1,PIAS3,NR1H2,CASP8AP2,LANCL2,RNF8,MAGED1,MYH9,RASL10A,DNAJC3,TMBIM6,SLC9A1,ODC1,SLX1A/SLX1B,CABIN1,ADH5,EGR2,HIGD2A,CERS5,FBLN1,ATF4,RUVBL2,UNG,MAP3K2,GNE,SHISA5,TYMS,TP53,ESPL1,BLVRA,RRM2,OPN3,TPM3,ANO6,KLF13,SKP2,NDNL2,HSPA8,ST3GAL1,BTG2,NEK4,INVS,TFRC,GAPDH,RPL10,PARD3,XRCC5,PRDX2,FANCM,DEK,FBXO10,AKAP8,Dieu2,CDK4,CTDSPL,TMEM214,TNFAIP8L1,RNF130,BCL11B,MED28,NUF2,MMS22L,THUMP2,KSR1,SPAG5,CDKN3,OGT,ARF6,MAP4,TRIM27,ALMS1,ZFAND5,DAB2,DIS3,NFE2L2,RAD21,DHX9,PRKDC,DENND4A,HNRNPU,GNA12,CUL7,CDH6,TPK1,ST3GAL3,SLC29A1,LAMB2,SDF2L1,CCNE1,TUBA1A,MEF2D,EIF4A1,CDKN1A,CCT7,UBTF,MAP3K3,SGCD,CASP7,MAOA,AKAP1,ILF3,MAP3K11,MSH3,GNB2L1,TIMM50,PEX11B,BAG3,RARG,AP2A2,TGFBR2,MYC,FDFT1,STK4,RHOB,PIM1,PPP3R1,PACS2,FIGNL1,XPO1,PDCD6,MYBL2,CHTF18,BRIP1,E4F1,PPP1R15B,KLF11,ITGB3BP,CLASP1,EIF4B,HUWE1,SMC3,EBAG9,PELP1,KANK2,SAP30BP,HELLS,C9orf114,BUB1B,ATAD2,KMT2A,SLC3A2,CBLB,PIAS4,TFAM,DUSP1,GCNT1,CDCA7L,XRCC6,SORCS2,MAD1L1,PKMYT1,NDC80,HSP90AA1,INPP5K,ACTN4,PIDD1,RBBP4,RPSA,B2M,MOB3A,ARID1A,UBE2N,MCFD2,RAD50,HNRNPK,IGF2BP1,CDC25B,RAD51,SHC1,CCNA2,SP3,FANCD2,NET1,NOP58,RAD17,CABLES2,OPA1,NAMPT,DNAJB1,SUDS3,MCM9,RPS3,LONP1,GMFB,C10orf88,PRKCA,ARC,NDUFAF4,SLC20A1,SDC1,HAUS8,EMD,CANX,SENP2,FOXM1,PSME3,NBN,MAPK14,PRKCI,IRF2BP2,RAD9A,SLC33A1,ZNF622,EHD4,COX5A,MSH6,ZNF346,CDC34,SLC19A2,WFS1,KIF18A,CENPF,MZF1,PCGF2,TGFBR3,COX8A,CDC7,SFPQ,CDKN2C,HES1,RICTOR,FANCB,MXD3,MTF1,EZR,MED21,SHQ1,TARDBP,HNRNPUL1,IRS2,KMT2B,CENPJ,TIMP2,UPF2,NDRG1,TOBP1,FANCG,COPS5,SNAI1,PDRG1,RPA1,FANCC,UBE2S,RAD51D,PLA2G6,PI4K2A,VKORC1,NR1D1,GAB1,BSG,YARS,H2AFX,E2F1,MBD4,TMX1,GNB2,AHCTF1,CHKA,MSH5,HPRT1,CLSPN,LRP8,HELB,MAPK7,FH,CYR61,YEATS4,AZI2,HIST1H1C,VASH2,ADAM17,FN1,ATF7,DUSP6,HMGN1,CAMK2N2,SGMS1,CHEK1,WTAP,ID1,TRIB1,MTOR,YY1,BANF1,DCAF7,ADK,DGCR8,EIF3A,TOP2A,DAP3,CEBPA,PRKCE,SOCS2,MAP1LC3A,MCPH1,STIM1,HEXIM1,RXRβ,PCBP2,POT1,AIFM1,EPG5,RPS19,NUDCD3,LETM1,DCK,TBC1D9,ACTB,CDC6,DLX1,MCU,SIN3A,FADD,KITLG,RAD54B,SPDYA,mir-30,MCM2,LIMS1,ASCC3,CENPA,FEN1,RBPJ,ZFP36L2,GLS2,BIRC2,POLH,FZR1,SND1,ORC2,MCM8,ERCC6,PTPN23,MAPK1,INSIG1,FNIP2,TUBB,AURKB,LMNB1,VDAC2,STMN1,ROCK2,FGFR3,SRSF1,NCOA5,SIVA1,WRN,LPAR2,EZH2,DLST,PRND,HTRA2,SIAH2,NAA16,INIP,PUF60,BRCA1,RAD51C,KLF2,DLC1,SFR1,CDC25A,KIF14,RBL2,CDC37,PAFAH2,GPS2,STK11,TBP,PSMC4,SNW1,CCT6A,RANBP1,TMOD3,SSRP1,BAG4,TPX2,DPP9,GSR,SEL1L,CASC5,RNF4,ARRB2,PKD1,ZFR,EIF4A3,CASP2,GNL3,Paxip1,KATNB1,INCENP,TAGLN2,XRCC3,ZBTB7A,NFIX,CHD4,Pcnt,PKM,NUMB,SLC7A1,PPP1CB,TNFAIP3,POLI,TAOK1,BCAR1,PRKAG1,ROR2,HSP90B1,NLK,Ppp1cc,SP1,PCK2,MANF,CIT,TCP1,C11orf31,ARSB,BLM,STK40,E2F8,TAF6,S1PR2,ATG10,MAPK9,RPS6KA5,ING3,PSMA1,NFKBIZ,XIAP,FXR,FAU,AFF1,FDPS,GNAI2,PBX3,LPAR1,NUP62,SMARCC1,HMGCR,SHMT2,MCM7,LGALS1,WNT5A |

## Supplemental Table 7. General IPA functions for E2F1, E2F3A and E2F3B promoter targets

| ChIP-seq | Category                              | B-H p-value | Genes                                                                                                                                                                                                                                                                                                                                                                                                                                                                                                                                                                                                                                                          |
|----------|---------------------------------------|-------------|----------------------------------------------------------------------------------------------------------------------------------------------------------------------------------------------------------------------------------------------------------------------------------------------------------------------------------------------------------------------------------------------------------------------------------------------------------------------------------------------------------------------------------------------------------------------------------------------------------------------------------------------------------------|
| E2F1     | RNA Post-Transcriptional Modification | 1.06E-18    | HNRNPL,NPM1,PCBP1,AHCYL1,PLRG1,SFPQ,RPL35A,RCL1,INTS7,THRAP3,TARDBP,HNRNPUL1,TCERG1,SAFB,RNGTT,PABPC1,HNRNPA0,PAPOLA,HCFC1,NUFIP1,Srrm1,PTBP1,WDR83,CPSF3L,SRSF4,RBM39,HNRNPA2B1,PRPF4,SF3B3,SRSF10,WTAP,ZRSR2,SCAF4,RNPS1,RBMX,KHSRP,SARS,CDC5L,DIS3,SNRNP40,RPS19,HNRNPU,KHDRBS1,NCBP1,SRSF11,HNRNPD,MAGOH,SCAF11,PES1,CLK4,SF3B2,RPS16,DDX39B,RBM6,Rbmx1,USP49,CSTF3,INTS8,CDKN2A,PRPF19,INTS3,SRSF1,CPSF6,TSEN54,SNRPD1,HNRNPF,NONO,PPIG,PNN,SNRPF,TBP,SNW1,RBFOX2,PHRF1,Scaf1,SRSF3,SRSF7,SF3B4,DDX39A,IWS1,BARD1,CPSF1,RRP36,HNRNPK,TRA2A,POLR2A,CSTF2T,FARS2,NOP58,GEMIN4,TRNT1,DBR1,EXOSC2,TRA2B,NOP56,XRN2,ALKBH5,HNRNPM,RPS15,NUDT21,SNRNP70,HNRNPH3 |

## Supplemental Table 7. General IPA functions for E2F1, E2F3A and E2F3B promoter targets

| ChIP-seq | Category | B-H p-value | Genes                                                                                                                                                                                                                                                                                                                                                                                                                                                                                                                                                                                                                                                                                                                                                                                                                                                                                                                                                                                                                                                                                                                                                                                                                                                                                                                                                                                                                                                                                                                                                                                                                                                                                                                                                                                                                                                                                                                                                                                                                                                                                                                                                                                                                                                                                                                                                                                                                                                                                                                                                                                                                                                                                                                                                                                                                                                                                                                                                                                                                                                                                                                                                                                                                                                                                                                                                                                                                                                                                                                                                                                                                                                                                                                                                                                                                                                                                                                                                                                                                                                                                                                                                                                                                                                                                                                                                                                                                                                                                                                                                                                                                                                                                                                                                                                                                                                                                                                                    |
|----------|----------|-------------|------------------------------------------------------------------------------------------------------------------------------------------------------------------------------------------------------------------------------------------------------------------------------------------------------------------------------------------------------------------------------------------------------------------------------------------------------------------------------------------------------------------------------------------------------------------------------------------------------------------------------------------------------------------------------------------------------------------------------------------------------------------------------------------------------------------------------------------------------------------------------------------------------------------------------------------------------------------------------------------------------------------------------------------------------------------------------------------------------------------------------------------------------------------------------------------------------------------------------------------------------------------------------------------------------------------------------------------------------------------------------------------------------------------------------------------------------------------------------------------------------------------------------------------------------------------------------------------------------------------------------------------------------------------------------------------------------------------------------------------------------------------------------------------------------------------------------------------------------------------------------------------------------------------------------------------------------------------------------------------------------------------------------------------------------------------------------------------------------------------------------------------------------------------------------------------------------------------------------------------------------------------------------------------------------------------------------------------------------------------------------------------------------------------------------------------------------------------------------------------------------------------------------------------------------------------------------------------------------------------------------------------------------------------------------------------------------------------------------------------------------------------------------------------------------------------------------------------------------------------------------------------------------------------------------------------------------------------------------------------------------------------------------------------------------------------------------------------------------------------------------------------------------------------------------------------------------------------------------------------------------------------------------------------------------------------------------------------------------------------------------------------------------------------------------------------------------------------------------------------------------------------------------------------------------------------------------------------------------------------------------------------------------------------------------------------------------------------------------------------------------------------------------------------------------------------------------------------------------------------------------------------------------------------------------------------------------------------------------------------------------------------------------------------------------------------------------------------------------------------------------------------------------------------------------------------------------------------------------------------------------------------------------------------------------------------------------------------------------------------------------------------------------------------------------------------------------------------------------------------------------------------------------------------------------------------------------------------------------------------------------------------------------------------------------------------------------------------------------------------------------------------------------------------------------------------------------------------------------------------------------------------------------------------------------------------|
| E2F1     | Cancer   | 1.28E-18    | RNF139,C1orf52,AJUBA,GLB1,WWOX,ZCCHC8,SMARCB1,SENP5,ETS1,RFC1,HIST1H2BM,EYA3,ALCAM,TMEM43,ELMO2,RTFDC1,PIM3,SLC1A5,RABL6,RBMX,PCNXL3,EXO1,ZKSCAN5,MTSS1L,CDS2,KPNB1,WBP2,TOE1,AP1G1,PIGU,IDI1,FBXO25,ZFP36L1,E2F6,SNRPD1,SMG6,CEP68,KCNAB2,PHRF1,NAGLU,ALDH18A1,POLD2,FAM134A,DZIP1L,STK33,NEDD1,CLUAP1,DENND6B,DDX27,GPHN,SEC14L1,HDBG,TBC1D1,STPG2,WDTCC1,WBP1,FRA10AC1,TRIP13,TACC3,HERPUD1,TUBB6,CAMTA1,ING1,BRPF1,HNRNPL,MCM6,ZFP62,TAPT1,UBR2,ZNF436,POU3F2,PCDHGC3,GKAP1,XRCC1,ZFP41,ZNF395,HIST1H2AJ,CBFB,TTL5,DNMT1,PABPC1,GET4,TMEM39B,HIRA,CNOT10,AP5Z1,MEX3A,RNF168,NCLN,ABHD8,SGOL1,HAUS6,CANT1,CPSF2,NCAPD3,CDT1,LEMD2,EMP2,GPX1,CUL1,TSGA10,TRIO,GPR3,HK2,RINT1,RNPS1,TICRR,RFC2,TXNL1,VCL,TCTN3,NCBP3,FKBP5,ORC1,ZNF526,CEP152,BANP,USPL1,SMC6,TSG101,COPS3,TRIM37,RHOBTB1,NCAPG2,RRM1,ZNF546,SENP1,CEP72,C8orf33,MUM1,NIPSNAP3A,KDEL3,DUS3L,NCAM1,PNO1,RPUSD2,FAM208A,YWHAQ,SSR3,TMEM230,KHNYN,PPP1R7,SLC25A23,RPRD2,GOLGA1,BIRC6,ATP10A,CDC123,MAT2B,NDUFAF2,NIN,BRAT1,C15orf41,KBTD8,FADS1,IWS1,MRE11A,MAN2C1,POLR2A,DSCR3,FBXL19,SURF6,TCF7L1,FAF1,PTPRU,HMG20B,THOC7,SYNE3,TTC7A,MTRF1L,H2AFV,TEX9,C17orf80,DDHD2,WDR90,PCBP1,WDR20,DLK2,ZFYVE1,SKIV2L,ZC3H12C,ZNF689,COPS6,TUBGCP3,APPL2,FAM118A,SCAMP4,ATE1,MORC2,PPOX,GTSE1,ANAPC5,RPL10,CEP95,FRG1,ANKLE1,STRIP2,FKBP2,FANCM,DEK,AP2A1,FBXO7,ARL4C,HNRNPA2B1,ODF2L,CDK4,CTDSPL,SPRTN,KIAA0754,MED28,BCL11B,NUF2,THUMP2,TMEM209,CDKN3,ZRSR2,OGT,GINS2,MAP4,PRR14L,DCUN1D4,FAM227A,TP53INP2,FAM73B,SOS1,ALG8,CDC5L,RAD21,DENND4A,N4BP2L2,YKT6,NOL9,CDH6,LARP4B,RCCD1,LAMB2,ABC2,GTF2H4,MEF2D,EIF4A1,C6orf62,MSRA,UBTF,PPIL1,FOXN2,MEGF9,HELX,RARG,TGFB2,MYC,AHDC1,RHOB,PPP3R1,AMOTL2,PACS2,FIGL1,CNOT6,KLF11,EIF4B,USP28,TEX264,KANK2,SAP30BP,FAM64A,BLVRB,DDOST,RBFOX2,CMSS1,BTBD8,BRD8,WDYHV1,RFX4,PIP5K1A,GMEB2,USP32,GIPC1,XRCC6,RAB26,CDCA7L,SEPT10,SORCS2,NDC80,HSP90AA1,MAD1L1,NCKAP5L,SYN3,FZD5,ACTN4,RBBP4,QRICH1,NEURL4,SPTS SA,TRA2A,DNAJC4,FYTTD1,NOP58,MEX3B,ACAD8,STX4,RPS3,VAR5,BTBD10,ARHGAP33,POMT2,RFX1,HAUS8,MORN1,DRG1,CANX,NMT2,NFKBIL1,PSME3,SPINK13,CCDC34,FAM111A,MAPK14,RIOK2,RAD9A,RAB36,ARPP21,HNRNPH3,ZNF451,CDKN2C,ERI1,PHACTR4,FANCB,ZNF367,MTF1,HNRNPUL1,EEFSEC,HEY2,KMT2B,TMEM55B,FANCG,GPATCH8,PDGR1,FANCC,ZNF414,RFC4,PI4K2A,ZNF202,E2F1,MSH5,HELB,YEATS4,AZI2,RTKN2,SGMS1,TRIB1,IFRD2,POLR2M,E2F5,ABHD2,PRKCE,NAA60,TBCD,ZWILCH,SAMD14,EPG5,TOR1AIP2,ATXN2L,PCDH9,RPIA,POLD1,WDR76,KIF15,mir-30,RBM6,FEN1,DNPH1,USP49,POLH,OSTF1,INSIG1,DYPY19L4,EZH2,PRND,CPNE2,RBL2,PSMC4,RANBP1,TMOD3,DPP9,GSR,ABHD17C,PTPRS,C1orf27,PFAS,TMPO,GDI1,MEIS2,NUP50,TAOK1,GANAB,RSRP1,CENPP,ADAL,PMF1/PMF1-BGLAP,CIT,OXCT1,LTBP4,ARSB,RHOF,S1PR2,ATG10,MDGA1,ANAPC13,GNAI2,KIF24,GFOD1,DYM,SNRNP70,PAQR4,SMARCC1,LRR1,ACAT2,POLA1,NUP133,SMARCD2,EIF4A2,GSK3A,SECISBP2,EWSR1,EIF3B,MAP1A,SAFB,FAM172A,AHCY,SARNP,GRK4,HCFC1,RGS19,NKTR,MMSO1,TAT,RGP1,GART,RAD1,DAXX,CNTRL,MB21D2,COX18,ECT2,NDST1,CCDC138,FANCA,HERPUD2,EIF3K,IRAK1BP1,BAG6,GNA11,SERHL2,MTCH1,SMARCA4,FXR2,C16orf72,PNRC1,C2CD5,HIST2H3D,FKBP3,KPNA3,GAS1,POLG2,DHX36,NCBP1,VPS26A,IGF2R,RPS16,CHAC1,COX7A2,FBXO5,TFB1M,RAB14,NAV2,MPRIP,YWHAH,LHX2,MICALL2,NUP58,RGPD4 (includes others),SMC1A,CTSD,CHMP2A,SETD8,COL19A1,STXBP1,WEE1,ASNA1,BAMBI,AURKA,HEATR3,CDCA2,PTPRM,DYNLRB1,OSBPL8,KIAA0907,CAND1,HIRIP3,SLC25A10,FOXP4,ABCD1,ALG14,LITAF,RND1,DDX26B,KIAA0101,BARD1,ZNF219,SPSB3,IQGAP1,SEMA4C,ZFAND2A,BCL7B,NAA40,NDUFBV1,GTF3C4,RACGAP1,SMARCD1,NFATC4,BIRC5,MTO1,UMPS,ALS2,FANCL,KLF5,C19orf47,ZDHHHC6,CERCAM,DEPDC1B,MTBP,PLRG1,DSTN,RAN,GTF2E2,Cyb5r3,RBL1,RPS11,EEF1D,HIST1H2AB,PLPP5,CD2AP,MPV17L2,SNIP1,CNOT1,DNAJB12,SNX13,ANGPTL6,SEPT7,YWHAZ,CKAP2,MTF2,MON2,MBD2,JUNB,MED12,RAB31,LARGE,UBE2G2,AAAS,MYO9A,CDAN1,DNAJC14,RTN4,CPSF3L,CDK19,NEK2,FYN,PRRC2A,KLHL18,CEP78,GSTM5,BTG3,B3GNT2,NRF1,STRA13,HMGB2,KANSL3,AAMP,C9orf89,EIF4G1,CORO2B,SF3B3,ATAD5,AKAP11,STOM,CETN3,RAB33B,CC2D1A,CREB1,HMG20A,NUP205,GNB1L,DTWD2,SUZ12,OSBP L9,SPC25,C2orf44,TIAL1,PLCG1,MDM2,MAGEB1,SCAF11,CDK1,NHLRC2,GLTP,CCDC85B,ATL2,CTNBL1,CHRAC1,SLC25A11,CIRBP,MMS19,SAAL1,WDR48,FARP1,ARF1,VPRBP,UNC5B,CNNM2,SPRED2,TLL12,FASN,HEXDC,TMUB2,HIST1H3J,FOSL2,TSPAN4,HIST1H3F,MCM5,GJA1,P4HB,TRIOBP,CASP3,ACOT13,POLE2,HIST1H3H,NUBP1,MUT,HYLS1,STARD4,Cdc42,TIMELESS,RFX2,TSNAXIP1,CDK2,CREBL2,BRD2,SH3BP4,EXOG,PA2G4,GADD45G,TMEM216,SET,IPO9,CSTF2T,GMNN,TTC16,PHGDH,TRNT1,OAZ1,CDCA5,SORBS3,GTPBP1,IFRD1,GOT2,IPO5,DHX15,EXOSC2,DNASE1L1,PAK4,MYCBP,SNRPB,TRA2B,UHRF1,PANK2,COTL1,DOCK7,RFC5,MTAP,PPP1R16A,SAMD4B,NR1H2,U2SURP,Sf1,RAVER1,CBFA2T2,HIST1H2AM,LANCL2,CASP8AP2,PRR12,CAB39L,SMC5,STK35,SNRNP48,MMGT1,MTHFD2,TARBP2,IQGAP3,SERBP1,C10orf76,ANO6,TPM3,GINS3,TBC1D14,HSPA8,TPST1,GALK1,BTG2,PCYOX1L,SRSF4,TSSC4,NUP188,PRDX2,CYP39A1,THADA,RNF130,HOXC9,GAS2L3,IRF2BP1,SLC16A10,RHBDL3,PRDM11,ST3GAL3,PES1,CLK4,TUBA1A,RIC8B,DOPEY2,VMP1,ZCWPW1,TCF19,SHMT1,SGCD,NUTF2,AKAP1,WRAP53,FOXRED1,DLGAP5,ILF3,CCDC15,PRELID3B,SLF2,STARD7,AP2A2,CLPP,KIF16B,BPGM,RFT |

## Supplemental Table 7. General IPA functions for E2F1, E2F3A and E2F3B promoter targets

| ChIP-seq | Category                            | B-H p-value | Genes                                                                                                                                                                                                                                                                                                                                                                                                                                                                                                                                                                                                                                                                                                                                                                                                                                                                                                                                                                                                                                                                                                                                                                                                                                                                                                                                                                                                                                                                                                                                                                                                                                                                                                                                                                                                                                                                                                                                                                                                                                                                                                                                                                                                                                                                                                                                                                                                                                                                                                                                                                                                                                                                                                                                                                                                                                                                                                                                                                                                                                                                                                                                                                                                                                                                                                                                                                                                                                                                                                                                                                                                                                                                                                                                                                                                                                                                                                                                                                                                                                                                                                                                                                                                                                                                                                                                                                                                                                                                                                                                                                                                                                                                                                                                                                                                                                                                                                                                                 |
|----------|-------------------------------------|-------------|-------------------------------------------------------------------------------------------------------------------------------------------------------------------------------------------------------------------------------------------------------------------------------------------------------------------------------------------------------------------------------------------------------------------------------------------------------------------------------------------------------------------------------------------------------------------------------------------------------------------------------------------------------------------------------------------------------------------------------------------------------------------------------------------------------------------------------------------------------------------------------------------------------------------------------------------------------------------------------------------------------------------------------------------------------------------------------------------------------------------------------------------------------------------------------------------------------------------------------------------------------------------------------------------------------------------------------------------------------------------------------------------------------------------------------------------------------------------------------------------------------------------------------------------------------------------------------------------------------------------------------------------------------------------------------------------------------------------------------------------------------------------------------------------------------------------------------------------------------------------------------------------------------------------------------------------------------------------------------------------------------------------------------------------------------------------------------------------------------------------------------------------------------------------------------------------------------------------------------------------------------------------------------------------------------------------------------------------------------------------------------------------------------------------------------------------------------------------------------------------------------------------------------------------------------------------------------------------------------------------------------------------------------------------------------------------------------------------------------------------------------------------------------------------------------------------------------------------------------------------------------------------------------------------------------------------------------------------------------------------------------------------------------------------------------------------------------------------------------------------------------------------------------------------------------------------------------------------------------------------------------------------------------------------------------------------------------------------------------------------------------------------------------------------------------------------------------------------------------------------------------------------------------------------------------------------------------------------------------------------------------------------------------------------------------------------------------------------------------------------------------------------------------------------------------------------------------------------------------------------------------------------------------------------------------------------------------------------------------------------------------------------------------------------------------------------------------------------------------------------------------------------------------------------------------------------------------------------------------------------------------------------------------------------------------------------------------------------------------------------------------------------------------------------------------------------------------------------------------------------------------------------------------------------------------------------------------------------------------------------------------------------------------------------------------------------------------------------------------------------------------------------------------------------------------------------------------------------------------------------------------------------------------------------------------------------------------|
| E2F1     | Organismal Injury and Abnormalities | 1.28E-18    | RNF139,C1orf52,AJUBA,GLB1,WWOX,ZCCHC8,SMARCB1,SENP5,ETS1,RFC1,HIST1H2BM,EYA3,ALCAM,TMEM43,ELMO2,RTFDC1,PIM3,SLC1A5,RABL6,RBMX,PCNXL3,EXO1,ZKSCAN5,MTSS1L,CDS2,KPNB1,WBP2,TOE1,AP1G1,PIGU,IDI1,FBXO25,ZFP36L1,E2F6,SNRPD1,SMG6,CEP68,KCNAB2,PHRF1,NAGLU,ALDH18A1,POLD2,FAM134A,DZIP1L,STK33,NEDD1,CLUAP1,DENND6B,DDX27,GPHN,SEC14L1,HDBG,TBC1D1,STPG2,WDTCC1,WBP1,FRA10AC1,TRIP13,TACC3,HERPUD1,TUBB6,CAMTA1,ING1,BRPF1,HNRNPL,MCM6,ZFP62,TAPT1,UBR2,ZNF436,POU3F2,PCDHGC3,GKAP1,XRCC1,ZFP41,ZNF395,HIST1H2AJ,CBFB,TTL5,DNMT1,PABPC1,GET4,TMEM39B,HIRA,CNOT10,AP5Z1,MEX3A,RNF168,NCLN,ABHD8,SGOL1,HAUS6,CANT1,CPSF2,NCAPD3,CDT1,LEMD2,EMP2,GPX1,CUL1,POLR2J,TSGA10,TRIO,GPR3,HK2,RINT1,RNPS1,TICRR,RFC2,TXNL1,VCL,TCTN3,NCBP3,FKBP5,ORC1,ZNF526,CEP152,BANP,USPL1,SMC6,TSG101,COPS3,TRIM37,RHOBTB1,NCAPG2,RRM1,ZNF546,SENP1,CEP72,C8orf33,MUM1,NIPSNAP3A,KDEL3,DUS3L,NCAM1,PNO1,RPUSD2,FAM208A,YWHAQ,SSR3,TMEM230,KHNYN,PPP1R7,SLC25A23,RPRD2,GOLGA1,BIRC6,ATP10A,CDC123,MAT2B,NDUFAF2,NIN,BRAT1,C15orf41,KBTD8,FADS1,IWS1,MRE11A,MAN2C1,POLR2A,DSCR3,FBXL19,SURF6,TCF7L1,FAF1,PTPRU,HMG20B,THOC7,SYNE3,TTC7A,MTRF1L,H2AFV,TEX9,C17orf80,DDHD2,WD R90,PCBP1,WDR20,DLK2,ZFYVE1,SKIV2L,ZC3H12C,ZNF689,COPS6,TUBGCP3,APPL2,FAM118A,SCAMP4,ATE1,MORC2,PPOX,GTSE1,ANAPC5,RPL10,CEP95,FRG1,ANKLE1,STRIP2,FKBP2,FANCM,DEK,AP2A1,FBXO7,ARL4C,HNRNPA2B1,ODF2L,CDK4,CTDSPL,SPRTN,KIAA0754,MED28,BCL11B,NUF2,THUMPD2,TMEM209,CDKN3,ZRSR2,OGT,GINS2,MAP4,PRR14L,DCUN1D4,FAM227A,TP53INP2,FAM73B,SOS1,ALG8,CDC5L,RAD21,DENND4A,N4BP2L2,YKT6,NOL9,CDH6,LARP4B,RCCD1,LAMB2,ABC2,ETF2H4,MEF2D,EIF4A1,C6orf62,MSRA,UBTF,PPIL1,FOXN2,MEGF9,HELQ,KXD1,RARG,TGFBR2,MYC,AHDC1,RHOB,PPP3R1,AMOTL2,PACS2,FIGNL1,CNOT6,KLF11,EIF4B,USP28,TEX264,KANK2,SAP30BP,FAM64A,BLVRB,DDOST,RBFOX2,CMSS1,BTBD8,BRD8,WDYHV1,RFX4,PIP5K1A,GMEB2,USP32,GIPC1,XRCC6,RAB26,CDCA7L,SEPT10,SORCS2,NDC80,HSP90AA1,MAD1L1,NCKAP5L,SYN3,FZD5,ACTN4,RBBP4,QRICH1,NEURL4,SPTSSA,TRA2A,DNAJC4,FYTTD1,NOP58,MEX3B,ACAD8,STX4,RPS3,VAR5,BTBD10,ARHGAP33,POMT2,RFX1,HAUS8,MORN1,DRG1,CANX,NMT2,NFKBIL1,PSME3,SPINK13,CCDC34,FAM111A,MAPK14,RIOK2,RAD9A,RAB36,ARPP21,HNRNPH3,ZNF451,CDKN2C,ERI1,PHACTR4,FANCB,ZNF367,MTF1,HNRNPU1,EEFSEC,HEY2,KMT2B,TMEM55B,FANCG,GPATCH8,PDRG1,FANCC,ZNF414,RFC4,PI4K2A,ZNF202,E2F1,MSH5,HELB,YEATS4,AZI2,RTKN2,SGMS1,TRIB1,IFRD2,POLR2M,E2F5,ABHD2,PRKCE,NAA60,TBCD,ZWILCH,SAMD14,EPG5,TOR1AIP2,ATXN2L,PCDH9,RPIA,POLD1,WDR76,KIF15,mir-30,RBM6,FEN1,DNPH1,USP49,POLH,OSTF1,INSIG1,DPY19L4,EZH2,PRND,CPNE2,RBL2,PSMC4,RANBP1,TMOD3,DPP9,GSR,ABHD17C,PTPRS,C1orf27,PFAS,TMPO,GDI1,MEIS2,NUP50,TAOK1,GANAB,RSRP1,CENPP,ADAL,PMF1/PMF1-BGLAP,CIT,OXCT1,LTBP4,ARSB,RHOF,S1PR2,ATG10,MDGA1,ANAPC13,GNAI2,KIF24,GFOD1,DYM,SNRNP70,PAQR4,SMARCC1,LRR1,ACAT2,POLA1,NUP133,SMARCD2,EIF4A2,GSK3A,SECISBP2,EWSR1,EIF3B,MAP1A,SAFB,FAM172A,AHCY,SARNP,GRK4,HCFC1,RGS19,NKTR,MSMO1,TAT,RGP1,GART,RAD1,DAXX,CNTRL,MB21D2,COX18,ECT2,NDST1,CCDC138,FANCA,HERPUD2,EIF3K,IRAK1BP1,BAG6,GNA11,SERHL2,MTCH1,SMARCA4,FXR2,C16orf72,PNRC1,C2CD5,HIST2H3D,FKBP3,KPNA3,GAS1,POLG2,DHX36,NCBP1,VPS26A,IGF2R,RPS16,CHAC1,COX7A2,FBXO5,TFB1M,ACTL6A,RAB14,NAV2,MPRIP,YWHAH,LHX2,MICALL2,NUP58,RGPD4 (includes others),SMC1A,CD164,CTSD,CHMP2A,SETD8,COL19A1,STXBP1,WEE1,ASNA1,BAMBI,AURKA,HEATR3,CDCA2,PTPRM,DYNLRB1,OSBPL8,KIAA0907,CAND1,HIRIP3,SLC25A10,FOXP4,ABCD1,ALG14,LITAF,RND1,DDX26B,KIAA0101,BARD1,ZNF219,SPSB3,IQGAP1,SEMA4C,ZFAND2A,BCL7B,NAA40,NDUFV1,GTF3C4,RACGAP1,SMARCD1,NFATC4,BIRC5,MTO1,UMPS,ALS2,FANCL,KLF5,C19orf47,ZDHHC6,CERCAM,DEPDC1B,MTBP,PLRG1,DSTN,RAN,GTF2E2,Cyb5r3,RBL1,RPS11,EEF1D,HIST1H2AB,PLPP5,CD2AP,MPV17L2,SNIP1,CNOT1,DNAJB12,SNX13,ANGPTL6,SEPT7,YWHAZ,CKAP2,MTF2,EXOSC8,MON2,MBD2,JUNB,MED12,RAB31,LARGE,UBE2G2,AAAS,MYO9A,CDAN1,DNAJC14,RTN4,CPSF3L,CDK19,NEK2,FYN,PRRC2A,KLHL18,CEP78,GSTM5,BTG3,B3GNT2,NRF1,STRA13,HMGB2,KANSL3,AAMP,C9orf89,EIF4G1,CORO2B,SF3B3,ATAD5,AKAP11,STOM,CETN3,RAB33B,CC2D1A,CREB1,HMG20A,NUP205,GNB1L,DTWD2,SUZ12,OSBPL9,SPC25,C2orf44,TIAL1,PLCG1,MDM2,MAGEB1,SCAF11,CDK1,NHLRC2,GLTP,CCDC85B,ATL2,CTNBL1,CHRAC1,SLC25A11,CIRBP,MS19,SAAL1,WDR48,FARP1,ARF1,VPRBP,MNS1,UNC5B,CNNM2,SPRED2,TTL12,FASN,HEXDC,TMUB2,HIST1H3J,FOSL2,TSPAN4,HIST1H3F,MCM5,GJA1,P4HB,TRIOBP,CASP3,ACOT13,POLE2,HIST1H3H,NUPB1,MUT,HYLS1,STARD4,Cdc42,TIMELESS,RFX2,TSNAXIP1,CDK2,CREBL2,BRD2,SH3BP4,EXO2,PA2G4,GADD45G,TMEM216,SET,IPO9,CSTF2T,GMNN,TTC16,PHGDH,TRNT1,OAZ1,CDCA5,SORBS3,GTPBP1,IFRD1,GOT2,IPO5,DHX15,EXOSC2,DNASE1L1,PAK4,MYCBP,SNRPB,TRA2B,UHRF1,PANK2,COTL1,DOCK7,RFC5,MTAP,PPP1R16A,SAMD4B,NR1H2,U2SURP,S1,RAVER1,CBFA2T2,HIST1H2AM,LANCL2,CASP8AP2,PRR12,CAB39L,SMC5,STK35,SNRNP48,MMGT1,MTHFD2,TARBP2,IQGAP3,SERBP1,C10orf76,ANO6,TPM3,GINS3,TBC1D14,HSPA8,TPST1,GALK1,BTG2,PCYOX1L,SRSF4,TSSC4,NUP188,PRDX2,CYP39A1,THADA,RNF130,HOXC9,GAS2L3,IRF2BP1,SLC16A10,RHBDL3,PRDM11,ST3GAL3,PES1,CLK4,TUBA1A,RIC8B,DOPEY2,VMP1,ZCWPW1,TCF19,SHMT1,SGCD,NUTF2,AKAP1,WRAP53,FOXRED1,DLGAP5,ILF3,CCDC15,PRELID3B,SLF2,STARD7,AP2A2. |

## Supplemental Table 7. General IPA functions for E2F1, E2F3A and E2F3B promoter targets

| ChIP-seq | Category                 | B-H p-value | Genes                                                                                                                                                                                                                                                                                                                                                                                                                                                                                                                                                                                                                                                                                                                                                                                                                                                                                                                                                                                                                                                                                                                                                                                                                                                                                                                                                                                                                                                                                                                                                                                                                                                                                                                                                                                                                                                                                                                                                                                                                                                                                                                                                                                                                                                                                                                                                                                                                                                                                                                                                                                                                                                                                                                                                                                                                                                                                                                                                                                                                                                                                                                                                                                                                                                                                                                                                                                                                                                                                                                                                                                                                                                                                                                                                                                                                                                                                                                                                                                                                                                                                                                                                                                                                                                                                                                                                                                                                                                                                                                                                                                                                                                                                                                                                                                                                                                                                                                                                                                    |
|----------|--------------------------|-------------|------------------------------------------------------------------------------------------------------------------------------------------------------------------------------------------------------------------------------------------------------------------------------------------------------------------------------------------------------------------------------------------------------------------------------------------------------------------------------------------------------------------------------------------------------------------------------------------------------------------------------------------------------------------------------------------------------------------------------------------------------------------------------------------------------------------------------------------------------------------------------------------------------------------------------------------------------------------------------------------------------------------------------------------------------------------------------------------------------------------------------------------------------------------------------------------------------------------------------------------------------------------------------------------------------------------------------------------------------------------------------------------------------------------------------------------------------------------------------------------------------------------------------------------------------------------------------------------------------------------------------------------------------------------------------------------------------------------------------------------------------------------------------------------------------------------------------------------------------------------------------------------------------------------------------------------------------------------------------------------------------------------------------------------------------------------------------------------------------------------------------------------------------------------------------------------------------------------------------------------------------------------------------------------------------------------------------------------------------------------------------------------------------------------------------------------------------------------------------------------------------------------------------------------------------------------------------------------------------------------------------------------------------------------------------------------------------------------------------------------------------------------------------------------------------------------------------------------------------------------------------------------------------------------------------------------------------------------------------------------------------------------------------------------------------------------------------------------------------------------------------------------------------------------------------------------------------------------------------------------------------------------------------------------------------------------------------------------------------------------------------------------------------------------------------------------------------------------------------------------------------------------------------------------------------------------------------------------------------------------------------------------------------------------------------------------------------------------------------------------------------------------------------------------------------------------------------------------------------------------------------------------------------------------------------------------------------------------------------------------------------------------------------------------------------------------------------------------------------------------------------------------------------------------------------------------------------------------------------------------------------------------------------------------------------------------------------------------------------------------------------------------------------------------------------------------------------------------------------------------------------------------------------------------------------------------------------------------------------------------------------------------------------------------------------------------------------------------------------------------------------------------------------------------------------------------------------------------------------------------------------------------------------------------------------------------------------------------------------------------|
| E2F1     | Gastrointestinal Disease | 2.85E-15    | RNF139,C1orf52,AJUBA,GLB1,SMARCB1,WWOX,ZCCHC8,ETS1,RFC1,HIST1H2BM,EYA3,ALCAM,ELMO2,RTFDC1,PIM3,SLC1A5,RABL6,RBMX,PCNXL3,EXO1,ZKSCAN5,MTSS1L,CDS2,KPNB1,TOE1,AP1G1,PIGU,IDI1,FBXO25,ZFP36L1,E2F6,SNRPD1,SMG6,CEP68,PHRF1,NAGLU,ALDH18A1,FAM134A,POLD2,ZIP1L,STK33,NEDD1,CLUAP1,DENND6B,DDX27,SEC14L1,HDGF,TBC1D1,STPG2,WBTC1,WBP1,TRIP13,FRA10AC1,TACC3,HERPUD1,TUBB6,CAMTA1,ING1,BRPF1,HNRNPL,MCM6,ZFP62,TAPT1,UBR2,POU3F2,PCDHGC3,GKAP1,XRCC1,ZNF395,CBFB,TLL5,DNMT1,GET4,PABPC1,TMEM39B,HIRA,CNOT10,AP5Z1,MEX3A,RNF168,NCLN,ABHD8,SGOL1,HAUS6,CANT1,CPSF2,NCAPD3,LEMD2,GPX1,CUL1,TSGA10,TRIO,GPR3,HK2,RINT1,TICRR,RFC2,TXNL1,VCL,CTN3,FKBP5,ORC1,CEP152,BANP,USPL1,SMC6,TRIM37,COPS3,TSG101,NCAPG2,RHOBTB1,RRM1,ZNF546,SENP1,CEP72,C8orf33,MUM1,KDEL3,DUS3L,NCAM1,RPUSD2,FAM208A,PPP1R7,TMEM230,KHNYN,SLC25A23,RPRD2,GOLGA1,BIRC6,ATP10A,CDC123,NIN,BRAT1,C15orf41,KBTD8,FADS1,MRE11A,MAN2C1,FBXL19,TCF7L1,FAF1,PTPRU,HMG20B,THOC7,SYNE3,MTRF1L,H2AFV,C17orf80,WDR90,PCBP1,WDR20,SKIV2L,DLK2,ZC3H12C,TUBGCP3,APPL2,SCAMP4,ATE1,MORC2,PPOX,GTSE1,ANAPC5,RPL10,CEP95,ANKLE1,FRG1,STRIP2,FKBP2,FANCM,DEK,AP2A1,FBXO7,ODF2L,HNRNPA2B1,CDK4,SPRTN,KIAA0754,BCL11B,NUF2,THUMP2,TMEM209,CDKN3,GINS2,OGT,MAP4,DCUN1D4,PRR14L,FAM227A,TP53INP2,FAM73B,SOS1,ALG8,CDC5L,RAD21,DENND4A,YKT6,N4BP2L2,NOL9,CDH6,LARP4B,RCCD1,LAMB2,ABCF2,MEF2D,EIF4A1,MSRA,UBTF,PPIL1,MEGF9,HELQ,RARG,MYC,TGFBR2,RHOB,AHDC1,AOTL2,PACS2,FIGNL1,KLF11,EIF4B,USP28,TEX264,KANK2,SAP30BP,FAM64A,BLVRB,DDOST,CMSS1,BTBD8,BRD8,RFX4,PIP5K1A,GMEB2,GIPC1,RAB26,CDCA7L,XRCC6,SEPT10,MAD1L1,HSP90AA1,NCKAP5L,SYN3,FZD5,RBBP4,QRICH1,NEURL4,TRA2A,FYTTD1,DNAJC4,NOP58,MEX3B,ACAD8,VARS,BTBD10,ARHGAP33,POMT2,MORN1,HAUS8,RFX1,DRG1,CANX,NMT2,NFKBIL1,PSME3,CCDC34,FAM111A,MAPK14,RIOK2,RAD9A,ARPP21,HNRNPH3,ZNF451,CN2C,ERI1,PHACTR4,FANCB,ZNF367,MTF1,EEFSEC,HNRNPUL1,KMT2B,TMEM55B,FANCG,GPATCH8,PDRG1,ZNF414,FANCC,PI4K2A,RFC4,ZNF202,E2F1,MSH5,HELB,YEATS4,AZI2,RTKN2,SGMS1,TRIB1,IFRD2,POLR2M,E2F5,ABHD2,PRKCE,NAA60,TBCD,ZWILCH,EPG5,SAMD14,TOR1AIP2,ATXN2L,PCDH9,POLD1,WDR76,KIF15,mir-30,RBM6,FEN1,USP49,POLH,OSTF1,INSIG1,DPY19L4,EZH2,PRND,CPNE2,RBL2,RANBP1,TM03,DPP9,ABHD17C,GSR,PTPRS,C1orf27,PFAS,TMPO,GDI1,MEIS2,TAOK1,GANAB,RSRP1,CENPP,ADAL,CIT,OXCT1,LTBP4,ARSB,RHOF,S1PR2,ATG10,MDGA1,GNAI2,KIF24,GFOD1,DYM,SNRNP70,PAQR4,SMARCC1,LRR1,ACAT2,POLA1,NUP133,GSK3A,EIF4A2,SECISBP2,EIF3B,MAP1A,SAFB,FAM172A,SARNP,AHCY,GRK4,HCFC1,RGS19,NKTR,TAT,RGP1,GART,RAD1,CNTRL,DAXX,MB21D2,COX18,NDST1,CCDC138,ECT2,FANCA,HERPUD2,EIF3K,IRAK1BP1,BAG6,GNA11,MTCH1,SMARCA4,FXR2,C16orf72,PNRC1,C2CD5,KPNA3,DHX36,NCBP1,VPS26A,IGF2R,CHAC1,COX7A2,FBXO5,TFB1M,NAV2,RAB14,MPRIP,LHX2,YWHAH,MICALL2,NUP58,SMC1A,RGPD4 (includes others),CTSD,SETD8,COL19A1,STXBP1,WEE1,ASNA1,AURKA,HEATR3,PTPRM,CDCA2,OSBPL8,KIAA0907,HIRIP3,SLC25A10,FOXP4,ABCD1,DDX26B,KIAA0101,BARD1,ZNF219,IQGAP1,SEMA4C,ZFAND2A,BCL7B,NAA40,NDUFV1,GTF3C4,NFATC4,MTO1,BIRC5,UMPS,ALS2,FANCL,KLF5,C19orf47,ZDHHC6,MTBP,PLRG1,DSTN,RAN,GTF2E2,RBL1,EEF1D,CD2AP,MPV17L2,SNIP1,CNOT1,DNAJB12,SNX13,ANGPTL6,YWHAZ,CKAP2,MTF2,JUNB,MON2,MBD2,MED12,RAB31,UBE2G2,LARGE,AAAS,MYO9A,CDAN1,DNAJC14,CPSF3L,RTN4,CDK19,NEK2,PRRC2A,FYN,CEP78,GSTM5,BTG3,B3GNT2,NRF1,STRA13,HMGB2,KANSL3,AAMP,C9orf89,EIF4G1,CORO2B,SF3B3,ATAD5,AKAP11,STOM,CETN3,RAB33B,CC2D1A,CREB1,HMG20A,NUP205,GNB1L,SUZ12,OSBPL9,SFC25,C2orf44,PLCG1,TIAL1,MDM2,MAGEB1,SCAF11,CDK1,NHLRC2,GLTP,CHRAC1,CTNBL1,ATL2,CIRBP,MMS19,SAAL1,WDR48,FARP1,VPRBP,ARF1,UNC5B,CNNM2,SPRED2,TLL12,FASN,HEXDC,HIST1H3J,TMUB2,FOSL2,TSPAN4,HIST1H3F,MCM5,GJA1,P4HB,TRIOBP,CASP3,ACOT13,POLE2,NUBP1,HYLS1,MUT,TIMELESS,RFX2,TSNAXIP1,CDK2,BRD2,SH3BP4,EXO2,PA2G4,SET,IPO9,CSTF2T,GMNN,TRNT1,PHGDH,TTC16,OAZ1,CDCA5,SORBS3,GTPBP1,IFRD1,IPO5,PAK4,MYCBP,TRA2B,SNRPB,UHRF1,PANK2,COTL1,DOCK7,RFC5,MTAP,PPP1R16A,U2SURP,RAVER1,CBFA2T2,HIST1H2AM,CASP8AP2,PRR12,CAB39L,SMC5,STK35,SNRNP48,MMGT1,TARBP2,IQGAP3,SERBP1,C10orf76,ANO6,GINS3,TBC1D14,HSPA8,TPST1,PCYOX1L,TSSC4,NUP188,THADA,RNF130,HOXC9,GAS2L3,IRF2BP1,SLC16A10,RHBDL3,ST3GAL3,PES1,CLK4,TUBA1A,RIC8B,DOPEY2,VMP1,ZCWPW1,TCF19,SHMT1,AKAP1,WRAP53,DLGAP5,FOXRED1,ILF3,CCDC15,SLF2,STARD7,CLPP,AP2A2,KIF16B,NSUN6,IFT140,LEMD3,FDFT1,TNRC6C,PHF20,MITD1,MRPL46,NUCKS1,LACTB,TXND16,PGK1,NBEAL2,SYNE2,MYEF2,ZNF706,CLIP2,C9orf114,CBLB,CBX1,MLXIP,SRSF7,RNF219,SP9,PTPN21,DCBLD2,UBXN1,ZGPAT,SEC31A,ARID1A,TBC1D8B,TMEM60,ABCF1,FASTKD3,C14orf80,HNRNPK,MIER1,CDCA7,CDC25B,SHC1,POLR1C,FAM110A,WDFY3,RAD17,ENPP4,CABLES2,NAMPT,DNAJB1,MCM9,ARC,CAPZB,NMRAL1,PRDM4,ATL3,HNRNPM,WDR91,PSKH1,IRF2BP2,C2CD2,KIF5B,EHD4,ZNF622,THAP4,MSH6,QRSL1,CEP70,WNK1,GZF1,CENPF,MZF1,ARV1,TGFBR3,PCOLCE,CHAF1A,ZNF7,NEU1,RUSC1,EZR,TARDBP,KARS,CEP250,ANAPC11,TIMP2,CENPJ,PAPOLA,ARL6IP6,NDRG1,TOBP1,RABL3,COPS5,NUFI1,SNAI1,FNBP4,CTPS1,CRABP1,PTBP1,CCDC170,NSMCE2,TMX1,MBD4,AHCTF1,CHKA,HPRT1,CLSPN,MAPK7,SRD5A1,ALKBH7,CTNNA3,NUP214,XPO1,YY1.SLC2A6,DGCR8,CEBPA,MCPH1,MAP1LC3A,KIAA0391,HNRNPH2,KHSRP,RXR,PCBP2,FAM109A,AIFM1,FMN1,DCK,DDX50,TBC1D9,ACTB,GINS4. |

## Supplemental Table 7. General IPA functions for E2F1, E2F3A and E2F3B promoter targets

| ChIP-seq | Category              | B-H p-value | Genes                                                                                                                                                                                                                                                                                                                                                                                                                                                                                                                                                                                                                                                                                                                                                                                                                                                                                                                                                                                                                                                                                                                                                                                                                                                                                                                                                                                                                                                                                                                                                                                                                                                                                                                                                                                                                                                                                                                                                                                                                                                                                                                                                                                                                                                                                                                                                                                                                                                                                                                                                                                                                                                                                                                                                                                                                                                                                                                                                                                                                                                                                      |
|----------|-----------------------|-------------|--------------------------------------------------------------------------------------------------------------------------------------------------------------------------------------------------------------------------------------------------------------------------------------------------------------------------------------------------------------------------------------------------------------------------------------------------------------------------------------------------------------------------------------------------------------------------------------------------------------------------------------------------------------------------------------------------------------------------------------------------------------------------------------------------------------------------------------------------------------------------------------------------------------------------------------------------------------------------------------------------------------------------------------------------------------------------------------------------------------------------------------------------------------------------------------------------------------------------------------------------------------------------------------------------------------------------------------------------------------------------------------------------------------------------------------------------------------------------------------------------------------------------------------------------------------------------------------------------------------------------------------------------------------------------------------------------------------------------------------------------------------------------------------------------------------------------------------------------------------------------------------------------------------------------------------------------------------------------------------------------------------------------------------------------------------------------------------------------------------------------------------------------------------------------------------------------------------------------------------------------------------------------------------------------------------------------------------------------------------------------------------------------------------------------------------------------------------------------------------------------------------------------------------------------------------------------------------------------------------------------------------------------------------------------------------------------------------------------------------------------------------------------------------------------------------------------------------------------------------------------------------------------------------------------------------------------------------------------------------------------------------------------------------------------------------------------------------------|
| E2F1     | Organismal Survival   | 7.20E-15    | NPM1,AXIN1,SECISBP2,POR,XRCC2,WWOX,SMARCB1,TSC2,SAFB,ETS1,AFMID,CCNE2,CRKL,TCF3,OGG1,SP4,DAXX,TINF2,RMRP,NDST1,ECT2,BAG6,NA11,GAK,PPIA,HEXA,NUAK2,SMARCA4,PELO,TIPARP,KDM6A,ATN1,EXO1,KHDRBS1,POLG2,BBIP1,GAS1,DHX36,VPS26A,IGF2R,ARID3A,BUB1,TMEM107,MSH2,FBXO5,TFB1M,AP1G1,ACTL6A,CDKN2A,SOCS3,LHX2,ZFP36L1,RPGRIP1L,SC5D,RGPD4 (includes others),CTSD,E2F6,ESCO2,SETD8,COL19A1,STXBP1,ASNA1,DNA2,RAD54L,GNAZ,KCNAB2,AURKA,BCL2L1,H3F3A/H3F3B,GINS1,POLL,COMMD1,NAGLU,FOXP4,PIAS1,BARD1,CLUAP1,GPHN,PDCD10,E2F3,PTGES3,STUB1,TACC3,NFATC4,STK3,BIRC5,FANCL,KLF5,E2F7,CKS1B,BRCA2,ING1,EFEMP2,PLRG1,UBR2,RAN,POU3F2,PCDHGC3,RBL1,XRCC1,CD2AP,CBFB,RFX3,DNMT1,HMBS,SNX13,ANGPTL6,HIRA,MTF2,MED12,RAB31,SH3GL1,GAMT,RTN4,ARHGA P35,CDK19,FYN,SNAI2,GPX1,CUL1,NRF1,TRIO,H2AFX,MCOLN1,HK2,RINT1,CC2D1A,CREB1,VCL,PDE4DIP,SUZ12,PPIF,TRIM28,PLCG1,TIAL1,MDM2,COP S3,F3,TSG101,CDK1,NCAPG2,SEN1,MORF4L2,RBBP6,NCAM1,PNO1,PRPF19,PFN1,VPRBP,Was1,MNS1,FBXW7,AMD1,SPRED2,FASN,FOSL2,STIL,GJA1,CASP3,PPIG,NUBP1,MTA2,RHEBL1,BIRC6,RAC1,SLC25A37,MUT,MAPK8IP3,PALB2,Cdc42,NASP,TIMELESS,LFNG,SBNO2,CDK2,ZFAT,BRD2,SPRED1,ZMIZ1,POLR2A,NFYA,GMNN,PHGDH,RASSF1,CALR,PAK4,NRAS,UHRF1,TRA2B,HAT1,TCF7L1,MTAP,UBE3A,PRMT1,NR1H2,CBFA2T2,MYH10,MYH9,DNAJC3,SLC9A1,CABIN1,ADH5,EGR2,Tmsb4x (includes others),FBLN1,MTHFD2,ATF4,MGAT1,TARBP2,UNG,TP53,GNE,ESPL1,SEMA5A,TPM3,ATE1,FBXW8,CCNF,FSCN1,FADS2,TFRC,HIST1H1D,PARD3,XRCC5,FANCM,CDK4,BCL11B,CDKN3,ARF6,TRIM27,SOS1,DAB2,NFE2L2,DHX9,PRKDC,GNA12,CUL7,POLG,HNRNPD,LAMB2,PES1,CCNE1,MEF2D,EIF4A1,MBD3,CDKN1A,MSRA,SGCD,MAP3K3,CASP7,ILF3,MSH3,PEX11B,BAG3,TLN1,RARG,MYC,TGFBR2,FDFT1,STK4,LEMD3,EIF3D,PPP3R1,MYBL2,CHTF18,BRIP1,E4F1,PPP1R15B,TAB1,HUWE1,SYNE2,PNN,HELLS,C9orf114,BUB1B,KMT2A,SLC3A2,CBLB,RFX4,PIP5K1A,HNRNPAB,PIAS4,TFAM,DUSP1,RC3H1,XRCC6,RE CQL4,MAD1L1,LMNB2,HSP90AA1,NDC80,FZD5,ACTN4,RPSA,B2M,ARID1A,UBE2N,GTTF2,TAF7,HNRNPK,IGF2BP1,RAD50,RAD51,CCNA2,SHC1,FANCD2,RAD17,DNAJB1,STX4,SUDS3,PRKCA,ARC,SLC20A1,POMT2,SDC1,CAPZB,SLC9A3R1,TUBG1,CANX,FOXO1,GAN,NBN,MAPK14,PRKCI,KIF5B,RAD9A,EHD4,MSH6,SLC19A2,MZF1,PCGF2,TGFBR3,TOR1A,CDC7,CDKN2C,ERI1,HES1,RICTOR,CHAF1A,MTF1,MED21,TARDBP,IRS2,HEY2,CENPJ,KMT2B,PITPNB,THE M4,TIMP2,UPF2,NDRG1,TOBP1,FANCG,TKT,COPS5,SNAI1,RAD51D,CRABP1,PTBP1,PLA2G6,BSG,GAB1,VKORC1,H2AFX,E2F1,CHKA,AHCTF1,HPRT1,L RP8,MAPK7,CYR61,FH,HIST1H1C,ADAM17,FN1,TCEA1,ATF7,CTNNA3,HMG1N,SP2,SGMS1,SRSF10,CHEK1,ID1,MTOR,YY1,PTS,ADK,DGCR8,PTP2A,CEBP A,E2F5,MCPH1,STIM1,HEXIM1,KHSRP,RXR,ROT1,AIFM1,RPS19,Ahp32e,ACTB,CENPU,DLX1,GINS4,POLD1,SIN3A,FADD,KITLG,RAD54B,MCM2,LIMS1,ADAM10,FEN1,RBPJ,ZFP36L2,MBD5,BIRC2,FZR1,ERCC6,MAPK1,INSIG1,MMP16,DIAPH3,NR2F2,AURKB,LMNB1,FGFR3,ROCK2,SRSF1,NCOA5,SIVA1,WRN,EZH2,SIAH2,HTRA2,RAD51C,BRCA1,DLC1,KLF2,Fus,CDC25A,RBL2,ULK4,STK11,PSMC4,TBP,RAB8A,TMOD3,SSRP1,SRSF3,PANK1,ARRB2,ZFR,PKD1,CASP2,SNX1,CNPY3,PTPRS,GNL3,EXTL3,Paxip1,INCENP,ZBTB7A,NFIX,MED23,PKM,NUMB,SLC7A1,TNFAIP3,BCAR1,ROR2,HSP90B1,SP1,CIT,MAML3,ATF6B,RBM15,DPH3,BLM,STK40,E2F8,SLC25A25,S1PR2,MAPK9,RPS6KA5,USP1,NFKBIZ,XIAP,AFF1,GNAI2,PBX3,LPAR1,NUP62,SMARCC1,HMGR,SHMT2,WNT5A |
| E2F1     | Embryonic Development | 1.38E-14    | NPM1,AXIN1,XRCC2,GLB1,AJUBA,SMARCB1,TSC2,MTHFD2,MGAT1,TP53,ETS1,CCNE2,ESPL1,TPM3,ATE1,DAXX,CCNF,BTG2,RAD18,TFRC,HIST1H1D,ECT2,XRCC5,CDK4,SMARCA4,KSR1,OGT,PELO,KDM6A,PIK3C3,ARHGAP19,SOS1,DAB2,NFE2L2,GAS1,POLG2,GNA12,CUL7,POLG,IGF2R,ARID3A,PES1,CCNE1,MTHFD1L,MSH2,CDKN1A,SHMT1,FBXO5,TFB1M,AP1G1,CDKN2A,SOCS3,LHX2,ZFP36L1,TLN1,RPGRIP1L,RARG,MYC,TGFBR2,STK4,TNRC6C,PIM1,PPP3R1,MYBL2,E4F1,PPP1R15B,ESCO2,SETD8,PNN,RAD54L,AURKA,C9orf114,KMT2A,BCL2L1,PIP5K1A,GINS1,RC3H1,COMMD1,LMNB2,FZD5,RPSA,NMT1,ARID1A,RAB23,CLUAP1,PDCD10,RAD50,SEMA4C,TOM1L1,RAD51,SHC1,SP3,RAD17,OPA1,DNAJB1,ARC,POMT2,TACC3,TUBG1,NFATC4,STK3,FOXO1,MT HFD1,BIRC5,NBN,MAPK14,SLC33A1,RAD9A,KIF5B,E2F7,KLF5,BRCA2,BRPF1,MZF1,PCGF2,PLRG1,UBR2,CDC7,CDKN2C,PHACTR4,HES1,RBL1,RICTOR,XRCC1,CHAF1A,MXD3,PTP4A2,MED21,IRS2,CBFB,HEY2,DNMT1,TIMP2,CENPJ,CNOT1,Irx5,NDRG1,TOBP1,SNX13,ANGPTL6,TKT,COPS5,SNAI1,HIRA,MTF2,JUNB,HMGA1,MED12,GAB1,BSG,H2AFX,ARHGAP35,MAPK7,FYN,HIST1H1C,FN1,ATF7,TCEA1,WWTR1,SUV39H2,CUL1,HMG1N,NRF1,SP2,CHEK1,ID1,N EIL3,YY1,MTOR,HK2,RINT1,TRIM16,MCPH1,VCL,AIFM1,GLMN,RPS19,SUZ12,CENPU,PLCG1,TIAL1,MDM2,PLK1,F3,TSG101,COPS3,CDK1,KITLG,FADD,mir-30,MORF4L2,LIMS1,KIF20B,ADAM10,RBPJ,FEN1,ZFP36L2,RBBP6,NCAM1,PNO1,PFN1,PRPF19,MAPK1,DIAPH3,Was1,FBXW7,AURKB,AMD1,LMNB1,FGFR3,ROCK2,WRN,EZH2,FASN,BRCA1,KLF2,DLC1,CDC25A,GJA1,RBL2,STIL,CASP3,STK11,TBP,BIRC6,PSMC4,RAC1,MAPK8IP3,FOXC1,SEL1L,SRSF3,PALB2,Cdc42,NASP,TIMELESS,PKD1,SNX1,LFNG,GNL3,Paxip1,CDK2,ZFAT,NUMB,ZMIZ1,ROR2,TRIM24,HSP90B1,NFYA,SP1,GMNN,PHGDH,MAML3,DPH3,BLM,E2F8,PAK4,S1PR2,NRAS,TRA2B,UHRF1,MAPK9,USP1,TCF7L1,LPAR1,LGALS1,WNT5A                                                                                                                                                                                                                                                                                                                                                                                                                                                                                                                                                                                                                                                                                                                                                                                                                                                                                                                                                                                                                                                                                                                                                                                                                                                                                                                                                                                                                                                                        |

## Supplemental Table 7. General IPA functions for E2F1, E2F3A and E2F3B promoter targets

| ChIP-seq | Category               | B-H p-value | Genes                                                                                                                                                                                                                                                                                                                                                                                                                                                                                                                                                                                                                                                                                                                                                                                                                                                                                                                                                                                                                                                                                                                                                                                                                                                                                                                                                                                                                                                                                                                                                                                                                                                                                                                                                                                                                                                                                                                                                      |
|----------|------------------------|-------------|------------------------------------------------------------------------------------------------------------------------------------------------------------------------------------------------------------------------------------------------------------------------------------------------------------------------------------------------------------------------------------------------------------------------------------------------------------------------------------------------------------------------------------------------------------------------------------------------------------------------------------------------------------------------------------------------------------------------------------------------------------------------------------------------------------------------------------------------------------------------------------------------------------------------------------------------------------------------------------------------------------------------------------------------------------------------------------------------------------------------------------------------------------------------------------------------------------------------------------------------------------------------------------------------------------------------------------------------------------------------------------------------------------------------------------------------------------------------------------------------------------------------------------------------------------------------------------------------------------------------------------------------------------------------------------------------------------------------------------------------------------------------------------------------------------------------------------------------------------------------------------------------------------------------------------------------------------|
| E2F1     | Developmental Disorder | 2.07E-13    | RPL35A,POR,SKIV2L,XRCC2,EGR2,FBLN1,TSC2,WWOX,ATF4,MGAT1,TP53,GNE,TYMS,ETS1,CCNE2,ESPL1,CRKL,TPM3,TCF3,FBXW8,DAXX,CCNF,TFRC,HIST1H1D,TMEM43,RMRP,PARD3,ECT2,NDST1,FANCA,XRCC5,PIM3,AKAP8,mir-331,BAG6,CDK4,HEXA,HOXC9,NUAK2,SMARCA4,LBR,B4GALT7,PELO,KDM6A,PIK3C3,SOS1,DAB2,B3GALNT2,NFE2L2,RAD21,PHF6,HNRNPU,POLG2,GAS1,CUL7,POLG,HNRNPD,VPS26A,IGF2R,LAMB2,PES1,CCNE1,MTHFD1L,TUBA1A,TMEM107,CDKN1A,FBXO5,MSRA,POC1A,SGCD,AP1G1,CASP7,LHX2,ZFP36L1,RPGRIP1L,RARG,SC5D,SMC1A,MYC,TGFBR2,IFT140,FDFT1,E2F6,STK4,LEMD3,UFSP2,PIM1,MATR3,BRIP1,PPP1R15B,CLASP1,ESCO2,SETD8,HUWE1,SMC3,SYNE2,PNN,ORC6,DNA2,LZTR1,C9orf114,AURKA,KMT2A,BCL2L1,RFX4,H3F3A/H3F3B,RC3H1,RECQL4,mir-210,SMCHD1,COMMD1,SF3B4,LMNB2,ACTN4,RPSA,RAB23,E2F3,IGF2BP1,PTGES3,RAD51,POLR1C,FANCD2,DNAJB1,LONP1,ARC,SLC20A1,POMT2,TACC3,TUBG1,CANX,EMD,NFATC4,STK3,MTHFD1,BIRC5,PSME3,ALS2,FANCL,NBN,MAPK14,PRKCI,FAM111A,KIF5B,SLC33A1,KLF5,E2F7,BRCA2,FANCI,PLRG1,CEP120,PCGF2,TGFBR3,UBR2,mir-148,POU3F2,HES1,RBL1,CHAF1A,XRCC1,FANCB,CD2AP,MED21,SNIP1,CBFB,SPECC1L,SLC39A13,HEY2,RFX3,APEX2,CENPJ,KMT2B,CSRP2,FANCG,TKT,COPS5,SNAI1,HIRA,EXOSC8,FANCC,RAD51D,MED12,CRABP1,LARGE,SH3GL1,BSG,H2AFX,ARHGAP35,MAPK7,CANT1,HIST1H1C,SNAI2,FN1,ATF7,CDT1,GPX1,SP2,TAX1BP3,CHEK1,SRSF10,TRIB1,MCOLN1,IDI1,MTOR,YY1,HK2,PTS,RAB33B,E2F5,CEBPA,MCPH1,STIM1,VCL,TCTN3,TBCD,RXR,ORC1,EPG5,RPS19,FMN1,CEP152,SUZ12,ACTB,CDC6,CENPU,TIAL1,PLCG1,DLX1,MDM2,F3,COPS3,POLD1,FADD,mir-30,LIMS1,ADAM10,FEN1,RBPJ,RBBP6,MBD5,FZR1,PFN1,PRPF19,ERCC6,MAPK1,INSIG1,Wasl,MMP16,TMCO1,NR2F2,FBXW7,TUBB,LMNB1,FGFR3,TSEN54,FASN,EZH2,NIPBL,FOSL2,RAD51C,BRCA1,KLF2,CDC25A,RBL2,P4HB,STIL,GJA1,WDR34,CASP3,STK11,RAC1,PSMC4,BIRC6,RANBP1,MUT,FOXC1,SRSF3,PALB2,CASC5,NIN,NASP,PKD1,EIF4A3,CNPY3,PTPRS,SNX1,GNL3,LFNG,Paxip1,KATNB1,CDK5RAP2,MED23,NFIX,NUMB,PIGV,BCAR1,ROR2,HSP90B1,POLR2A,GMNN,PHGDH,DPH3,BLM,E2F8,RASSF1,CALR,PAK4,NRAS,TAF6,UHRF1,SNRNPB,MAPK9,UBE3A,MTAP,GNAI2,PBX3,LPAR1,DYM,SMARCC1,WNT5A |



## Supplemental Table 7. General IPA functions for E2F1, E2F3A and E2F3B promoter targets

| ChIP-seq | Category             | B-H p-value | Genes                                                                                                                                                                                                                                                                                                                                                                                                                                                                                                                                                                                                                                                                                                                                                                                                                                                                                                                                                                                                                                                                                                                                                                                                                                                                                                                                                                                                                                                                                                                                                                                                                                                                                                                                                                                                                                                                                                                                                                                                                                                                                                                                                                                                                                                                                                                                                                                                                                                                                                                                                                                                                                                                                                                                                                                                                                                                                                                                                                                                                                                                                                                                                                                                                                                                                                                                                                                                                                                                                                                                                                                                                                                                                                                                                                                                                                                                                          |
|----------|----------------------|-------------|------------------------------------------------------------------------------------------------------------------------------------------------------------------------------------------------------------------------------------------------------------------------------------------------------------------------------------------------------------------------------------------------------------------------------------------------------------------------------------------------------------------------------------------------------------------------------------------------------------------------------------------------------------------------------------------------------------------------------------------------------------------------------------------------------------------------------------------------------------------------------------------------------------------------------------------------------------------------------------------------------------------------------------------------------------------------------------------------------------------------------------------------------------------------------------------------------------------------------------------------------------------------------------------------------------------------------------------------------------------------------------------------------------------------------------------------------------------------------------------------------------------------------------------------------------------------------------------------------------------------------------------------------------------------------------------------------------------------------------------------------------------------------------------------------------------------------------------------------------------------------------------------------------------------------------------------------------------------------------------------------------------------------------------------------------------------------------------------------------------------------------------------------------------------------------------------------------------------------------------------------------------------------------------------------------------------------------------------------------------------------------------------------------------------------------------------------------------------------------------------------------------------------------------------------------------------------------------------------------------------------------------------------------------------------------------------------------------------------------------------------------------------------------------------------------------------------------------------------------------------------------------------------------------------------------------------------------------------------------------------------------------------------------------------------------------------------------------------------------------------------------------------------------------------------------------------------------------------------------------------------------------------------------------------------------------------------------------------------------------------------------------------------------------------------------------------------------------------------------------------------------------------------------------------------------------------------------------------------------------------------------------------------------------------------------------------------------------------------------------------------------------------------------------------------------------------------------------------------------------------------------------------|
| E2F1     | Cellular Development | 9.94E-13    | NPM1,AXIN1,PALM,FRMD6,GSK3A,POR,XRCC2,Ewsr1,EIF3B,AJUBA,TSC2,SMARCB1,WWOX,SAFB,AHCY,RRAGC,ETS1,NKTR,RGS19,CCNE2,PEAK1,CRK L,RFC1,TCF3,SP4,DAXX,ALCAM,NDST1,ECT2,FANCA,PIM3,GADD45B,SLC1A5,mir-331,BAG6,PRDX4,GNA11,GAK,PPIA,SMARCA4,FXR2,DIABLO,RABL6,TIPARP,KDM6A,RBMX,PIK3C3,ARHGAP19,ATN1,KHDRBS1,GAS1,IGF2R,ARID3A,BUB1,AGPAT5,MSH2,WBP2,CDKN2A,SOCS3,LHX2,ZFP36L1,RSL1D1,CBX5,SMC1A,CD164,CTSD,JUND,ESCO2,GNAZ,KCNAB2,AURKA,PTPRM,CDCA2,OSBPL8,CAND1,BCL2L1,H3F3A/H3F3B,mir-210,POLL,SF3B4,PPAT,SUMO3,RND1,KIAA0101,RAB23,KLF10,PIAS1,BARD1,RNASEH2B,CSR1,NUDT7,IQGAP1,E2F3,PDCD10,ZBTB24,SEMA4C,PTGES3,TOM1L1,HDGF,STUB1,TACC3,RACGAP1,SMARCE1,NFATC4,STK3,BIRC5,RPS15,E2F7,KLF5,CKS1B,BRCA2,BRPF1,ING1,HNRNPL,ZNF784,MTBP,UBR2,mir-148,RAN,POU3F2,RBL1,RPS11,EEF1D,CTDSP1,CHMP2B,SNIP1,CBFB,DNMT1,GET4,CNOT1,HIRA,YWHAZ,MTF2,MBD2,HMGA1,JUNB,MED12,SH3GL1,SUCO,RTN4,NEK2,FYN,SNAI2,CDT1,BTG3,LEMD2,GPX1,CUL1,STRA13,TRIO,HMGB2,EIF4G1,H2AFZ,NEIL3,HK2,CREB1,TRIM16,HMG20A,VCL,FKBP5,WSB1,PIF,SUZ12,OSBPL9,HDGFRP2,TRIM28,PLCG1,MDM2,PLK1,NAP1L1,COPS3,TSG101,F3,CDK1,RRM1,SENP1,CCDC85B,CIRBP,GCAT,RBBP6,NCAM1,WDR48,PRPF19,PFN1,FARP1,VPRBP,ARF1,WasI,UNC5B,FBXW7,SPRED2,AMD1,PBK,YWHAQ,HIST1H4F,HIST1H4A,HIST1H4C,STAG1,FASN,HIST1H4J,AAGAB,FOSL2,CYB5D2,GJA1,CASP3,NUBP1,MTA2,RAC1,BIRC6,NDUFAF2,MAT2B,MAPK8IP3,CMC2,OSTM1,HERC2,Cdc42,NASP,LFNG,SBNO2,CDK5RAP2,CDK2,CREBL2,ZFAT,SPRED1,DDX39A,PA2G4,GADD45G,ZMIZ1,SET,UHRF2,TRIM24,NFYA,SETD6,GMNN,SIPA1,PHGDH,OAZ1,Pvr,CDCA5,IFRD1,RASSF1,CALR,PAK4,MYCBP,NRAS,Bhlhe41,UHRF1,HAT1,DOCK7,TCF7L1,UBE3A,MTAP,NCAPH2,C19orf68,PRMT1,FAF1,PIAS3,TMEM2,NR1H2,PTPRU,HMG20B,TTCT7A,CBFA2T2,MAGED1,RASL10A,SLC9A1,ODC1,ADH5,DLK2,Tmsb4x (includes others),EGR2,FBLN1,COPS6,ATF4,GNE,TYMS,TP53,PAPD4,ESPL1,SEMA5A,RRM2,TPM3,KLF13,CDCA4,SKP2,NDNL2,FBXW8,MICU1,EIF4H,CCNF,FSCN1,BTG2,GAPDH,HIST1H1D,TFRC,SUMO2,SRSF4,SPPL2A,XRCC5,PRDX2,DEK,HNRNPA2B1,CDK4,CTDSPL,DNAJC13,BCL11B,MED28,KSR1,CDKN3,OGT,B4GALT7,ARF6,TRIM27,ALMS1,TP53INP2,SOS1,DAB2,KIF2C,NFE2L2,RAD21,DHX9,PRKDC,PHF6,MEMO1,HNRNPU,N4BP2L2,GNA12,MAPRE1,CUL7,MLF1,LAMB2,CCNE1,TUBA1A,MEF2D,SH2B2,EIF4A1,CDKN1A,VMP1,SHMT1,LBH,UBTF,PPIL1,CASP7,DLGAP5,ILF3,MAP3K11,MSH3,GNB2L1,PEX11B,TLN1,RARG,MYC,TGFBR2,LEMD3,STK4,FDFT1,TNRC6C,RHOB,PIM1,AMOTL2,XPO1,FIGNL1,MYBL2,E4F1,TAB1,EIF4B,HUWE1,PGK1,USP28,SMC3,PELP1,IER2,HELLS,BRD8,ATAD2,KMT2A,SLC3A2,CBLB,PIP5K1A,TFAM,CBX1,GCNT1,DUSP1,RC3H1,RECQL4,XRCC6,LMNB2,HSP90AA1,MAD1L1,FZD5,INPP5K,ACTN4,B2M,DCBLD2,NMT1,ZGPAT,ARID1A,GTF2I,HIST2H4B,TAF7,IGF2BP1,HNRNPK,CDCA7,CDC25B,TRA2A,RAD51,CCNA2,SHC1,SP3,FANCD2,NET1,NOP58,OPA1,NAMPT,MCM9,LONP1,PRKCA,ARHGAP33,NDUFAF4,SDC1,CAPZB,RFX1,SLC9A3R1,RPRD1B,AP1S2,EMD,SENP2,FOXO1,PSME3,NBN,CISD1,MAPK14,PRKCI,PHF19,KIF5B,RAD9A,ARPP21,WNK1,CENPF,MZF1,PCGF2,TGFBR3,SFPQ,CDKN2C,ZNF451,HES1,RICTOR,MXD3,THRAP3,EZR,TARDBP,IRS2,HEY2,KMT2B,THEM4,TIMP2,MEX3C,NDRG1,TOBP1,COPS5,SNAI1,RPA1,FANCC,PLA2G6,PTBP1,NR1D1,VKORC1,RFC4,GAB1,BSG,E2F1,AHCTF1,CHKA,RLG2,LRP8,MAPK7,CYR61,YEATS4,AZI2,VASH2,ADAM17,FN1,TCEA1,SUV39H2,DUSP6,WWTR1,HMGN1,RTKN2,CAMK2N2,SP2,SGMS1,CHEK1,TRIB1,ID1,YY1,MTOR,ADK,DGCR8,TOP2A,E2F5,EIF3A,CEBPA,SOCS2,PRKCE,MCPH1,STIM1,HNRNPH2,HEXIM1,SARS,RXR,PTP1A1,AIFM1,GLMN,RPS19,NUDCD3,DCK,ACTB,CDC6,RQCD1,DLX1,SIN3A,FADD,KITLG,ZNF516,mir-30,MCM2,LIMS1,KIF20B,ASCC3,CENPA,ADAM10,RBPJ,FEN1,ZFP36L2,HINFP,FZD7,POLH,BIRC2,FZR1,SND1,MCM8,ERCC6,TFG,MAPK1,INSIG1,TUBB,AURKB,LMNB1,ROCK2,FGFR3,STMN1,SRSF1,WRN,LPAR2,ASXL2,EZH2,NIPBL,SIAT2,BRCA1,KLF2,DLC1,FARP2,CDC25A,CDC37,RBL2,GPS2,STK11,ERH,RA B8A,SNW1,KIAA1715,FOXC1,TPX2,SRSF3,SEL1L,TOP1MT,TOB2,RNF4,CCNG2,PKD1,CASP2,EXTL3,GNL3,TAGLN2,RFC3,ZBTB7A,NFIX,PKM,MEIS2,NUMB,TNFAIP3,NAA10,BCAR1,ROR2,HSP90B1,NLK,Ppp1cc,SP1,PCK2,CIT,TCP1,RBM15,LTBP4,BLM,E2F8,NDUFAF3,TAF6,S1PR2,ATG10,MDGA1,MAPK9,RPS6K A5,USP1,RRS1,FDXR,XIAP,HIVEP2,AFF1,GNAI2,EXOC4,PBX3,LPAR1,PAQR4,HMGCR,MCM7,LGALS1,WNT5A |

**Supplemental Table 7. General IPA functions for E2F1, E2F3A and E2F3B promoter targets**

| ChIP-seq | Category                                   | B-H p-value | Genes                                                                                                                                                                                                                                                                                                                                                                                                                                                                                                                                                                                                                                                                                                                                                                                                                                                                                                                                                                                                                                                                                                                                                                                                                                                                                                                                                                                                                                                                                                                                                                                                                                                                                                                                                                                                                                                                                                                                                                                                                                                                                                                                                                                                                                                                                                                                                                                                                                                                                                                                                                                                                                                                                                                                              |
|----------|--------------------------------------------|-------------|----------------------------------------------------------------------------------------------------------------------------------------------------------------------------------------------------------------------------------------------------------------------------------------------------------------------------------------------------------------------------------------------------------------------------------------------------------------------------------------------------------------------------------------------------------------------------------------------------------------------------------------------------------------------------------------------------------------------------------------------------------------------------------------------------------------------------------------------------------------------------------------------------------------------------------------------------------------------------------------------------------------------------------------------------------------------------------------------------------------------------------------------------------------------------------------------------------------------------------------------------------------------------------------------------------------------------------------------------------------------------------------------------------------------------------------------------------------------------------------------------------------------------------------------------------------------------------------------------------------------------------------------------------------------------------------------------------------------------------------------------------------------------------------------------------------------------------------------------------------------------------------------------------------------------------------------------------------------------------------------------------------------------------------------------------------------------------------------------------------------------------------------------------------------------------------------------------------------------------------------------------------------------------------------------------------------------------------------------------------------------------------------------------------------------------------------------------------------------------------------------------------------------------------------------------------------------------------------------------------------------------------------------------------------------------------------------------------------------------------------------|
| E2F1     | Connective Tissue Development and Function | 1.16E-12    | NPM1, AXIN1, FRMD6, ODC1, XRCC2, Ewsr1, EGR2, EIF3B, SMARCB1, FBLN1, TSC2, ATF4, SAFB, UNG, AHCY, TP53, CCNE2, ESPL1, TPM3, RFC1, KLF13, TCF3, OGG1, SKP2, CNOT7, CCNF, BTG2, RAD18, TFRC, FANCA, XRCC5, PRDX2, PIM3, GADD45B, PRDX4, GAK, CDK4, SMARCA4, KSR1, OGT, B4GALT7, MAP4, PIK3C3, SOS1, NFE2L2, EXO1, DHX9, PRKDC, KHDRBS1, GAS1, GNA12, CUL7, IGF2R, ARID3A, BUB1, CCNE1, MSH2, CDKN1A, SH2B2, SHMT1, UBTF, PPI1, CASP7, ACTL6A, CDKN2A, SOCS3, MAP3K11, LHX2, GNB2L1, MYC, TGFB2, E2F6, CTSD, AK1, RHOB, PIM1, JUND, MYBL2, E4F1, PPP1R15B, TAB1, PGK1, SMC3, PELP1, HELLS, AURKA, BUB1B, KMT2A, SLC3A2, BCL2L1, DUSP1, RECQL4, XRCC6, POLL, MAD1L1, Gm15807/Hmgn5, PPAT, ARID1A, KIAA0101, GTF2I, PIAS1, RNASEH2B, E2F3, PTGES3, RAD50, HDGF, SHC1, CCNA2, FANCD2, STUB1, NOP58, MCM9, PRKCA, SLC20A1, EMD, FOXM1, BIRC5, PSME3, NBN, MAPK14, RAD9A, E2F7, KLF5, CKS1B, ZNF346, BRCA2, SLC19A2, BRPF1, ING1, WNK1, PCGF2, MTBP, PLRG1, CDC7, CDKN2C, SFPQ, RBL1, RICTOR, EEF1D, CBF3, IRS2, APEX2, NDRG1, COPS5, FANCG, CKAP2, HMGA1, JUNB, FANCC, SH3GL1, GAB1, E2F1, MBD4, FYN, FN1, BTG3, HMGN1, CUL1, SP2, CHEK1, ID1, YY1, CREB1, E2F5, EIF3A, CEBPA, PRKCE, VCL, POT1, RPS19, DCK, PPIF, SUZ12, ACTB, HDGFRP2, CDC6, PLCG1, MDM2, TSG101, SIN3A, RRM1, KITLG, FADD, SENP1, CIRBP, KIF20B, CENPA, FEN1, ZFP36L2, POLH, FZR1, MCM8, ERCC6, PRPF19, MAPK1, TFG, VPRBP, DIAPH3, Wasl, FBXW7, LMNB1, AMD1, STMN1, FGFR3, SRSF1, WRN, LPAR2, STAG1, FASN, EZH2, BRCA1, FOSL2, KLF2, CDC25A, GJA1, RBL2, PAFAH2, CASP3, STK11, RAC1, TMOD3, SSRP1, FOXC1, TOP1MT, TOB2, Cdc42, PKD1, GNL3, TMPO, CDK2, PA2G4, GADD45G, SLC7A1, BCAR1, PRKAG1, ZMIZ1, TRIM24, NFYA, SIPA1, Pvr, CDCA5, BLM, RASSF1, PAK4, S1PR2, NRAS, TAF6, HAT1, MAPK9, PRMT1, GNAI2, LPAR1, SHMT2, WNT5A                                                                                                                                                                                                                                                                                                                                                                                                                                                                                                                                                                                                                                                                                                                                                                                                                                                                                                                                                             |
| E2F1     | Cellular Movement                          | 5.81E-11    | MYH10, NPM1, CCP110, MYH9, DSTN, TGFB3, mir-148, SLC9A1, CD2AP, EZR, IRS2, CENPJ, ETS1, TP53, SNAI1, SEPT7, CKAP2, MBD2, PTBP1, BSG, FSCN1, AHCTF1, NEK2, ECT2, SNAI2, FN1, DUSP6, WWTR1, TRIO, CNTROB, ID1, ARF6, MTOR, YY1, PIK3C3, EIF3A, TOP2A, PRKCE, HEXIM1, MAPRE1, CDC6, PLCG1, PLK1, MDM2, FADD, PDXP, KIF20B, CDKN1A, WBP2, SEPT2, KIF23, ILF3, PFN1, MAPK1, DIAPH3, CBX5, AURKB, TGFB2, MYC, STMN1, RHOB, PIM1, EZH2, BRCA1, ARHGAP24, TAB1, SETD8, KIF14, CASP3, STK11, KIF4A, RAC1, BIRC6, RBFOX2, AURKA, FOXC1, SSRP1, BCL2L1, Cdc42, GIPC1, HSP90AA1, ACTN4, KLHL21, JTB, UVRAG, CEP55, INCENP, IQGAP1, PTGES3, CDC25B, CCNA2, NET1, CIT, NAMPT, STX4, SUDS3, RASSF1, PRKCA, CALR, PAK4, SLC9A3R1, RACGAP1, BIRC5, XIAP, PRMT1, GNAI2, FAF1, BRCA2                                                                                                                                                                                                                                                                                                                                                                                                                                                                                                                                                                                                                                                                                                                                                                                                                                                                                                                                                                                                                                                                                                                                                                                                                                                                                                                                                                                                                                                                                                                                                                                                                                                                                                                                                                                                                                                                                                                                                                                  |
| E2F1     | Cellular Function and Maintenance          | 6.93E-11    | NPM1, MYH10, RNF8, KIF13B, MYH9, SCLT1, AXIN1, POLA1, NUP133, Ubb, HAUS4, PALM, C21orf2, STK35, SLC9A1, XRCC2, Diap2, Tmsb4x (includes others), GLB1, AJUBA, MAP1A, SAFB, TP53, ETS1, GRK4, TUBGCP3, ESPL1, APPL2, CRKL, SEMA5A, TPM3, OGG1, SP4, FBXW8, DAXX, CCNF, FSCN1, BTG2, RAD18, GAPDH, TIN2, PARD3, NPHP3, ECT2, XRCC5, STRIP2, FANCM, DEK, PEX3, PLXNA3, GAK, CDK4, HEXA, DNAJC13, CKAP4, BCL11B, NUA2, GAS2L3, SPAG5, ARF6, MAP4, TRIM27, PELO, ALMS1, PIK3C3, KIF2C, RAD21, PRKDC, BBIP1, GNA12, MAPRE1, CUL7, KPNB1, LAMB2, PES1, TMEM107, CDKN1A, SH2B2, DOPEY2, FBXO5, CEP41, AP1G1, MAOA, KIF23, CDKN2A, DLGAP5, MPRIP, NCDN, YWHAH, LHX2, MICALL2, SMC4, BAG3, PEX11B, TIMM50, RPRG1, TLN1, SMC1A, MYC, IFT140, LE MD3, RHOB, RCC1, CHMP2A, XPO1, CEP131, CLASP1, SMG6, SYNE2, WEE1, KIF4A, DNA2, CEP68, RAD54L, RBFOX2, AURKA, PTPRM, SLC3A2, PIP5K1A, RFX4, H3F3A/H3F3B, MATN2, XRCC6, NAGLU, LMNB2, NDC80, HSP90AA1, ACTN4, MAST3, RBBP4, ABCD1, DZIP1L, TMEM138, ARID1A, RND1, KIZ, KIAA0101, UBE2N, RAB23, NEDD1, CSRP1, CLUAP1, IQGAP1, PTGES3, RAD50, HNRNP, HDGF, RAD51, CDC25B, SHC1, NET1, OPA1, TOR1B, RPS3, LONP1, ARC, PRKCA, ARHGAP33, TACC3, HAUS8, CAPZB, SLC9A3R1, RACGAP1, TUBG1, SMARCE1, EMD, CANX, NFATC4, FOXM1, ATL3, ALS2, GAN, BIRC5, NBN, RPA2, MAPK14, PRKCI, RAD9A, KIF5B, KLF5, BRCA2, CEP70, KIF18A, CENPF, CCP110, RAB5C, CEP120, MTBP, TOR1A, RAN, SFPQ, POU3F2, PHACTR4, RBL1, RICTOR, CHAF1A, HOOK3, CD2AP, CHMP2B, EZR, SPECC1L, CEP250, TAOK2, RFX3, CENPJ, NDRG1, FANCG, SEPT7, SLC17A5, RPA1, CKAP2, FANCC, RAD51D, ZMYM6, RAB31, DCTN6, CCNO, RNF168, BSG, GAB1, H2AFX, CDAN1, RTN4, HPRT1, LRP8, CYR61, NEK2, HAUS6, FYN, FN1, TCEA1, BTG3, SUV39H2, WWTR1, LEMD2, HMGN1, EMP2, TMEM11, TSGA10, TRIO, NRF1, HMB2, AKAP11, CHEK1, ID1, MTOR, YY1, CREB1, CC2D1A, ACAP2, CEBPA, PRKCE, TBCD, VCL, TCTN3, POT1, FAM109A, RGMB, FMN1, RPS19, CEP152, NUP85, CEP164, PDE4DIP, ACTB, SPC25, TOR1AIP2, PLK1, TSG101, F3, CDK1, KITLG, CHCHD3, CEP72, ATL2, MUM1, KIF20B, ADAM10, CEP192, SEPT2, NCAM1, ZMYM4, CLUH, FMNL3, MCM8, PRPF19, ERCC6, PFN1, MAPK1, PTPN23, FARP1, ARF1, DIAPH3, Wasl, MNS1, UNC5B, TUBB, ROCK2, STMN1, WRN, EZH2, FASN, MID1IP1, HTRA2, BRCA1, KLF2, ARHGAP24, Nolc1, DLC1, SFR1, FARP2, Ftx, RBL2, GJA1, STIL, NUP155, CASP3, STK11, ULK4, NUBP1, RAC1, RAB8A, RANBP1, TMOD3, MAPK8IP3, SSRP1, RALBP1, BAG4, TPX2, PALB2, RNF4, Cdc42, PKD1, SMC2, CORO1B, SNX1, UVRAG, CDK2, KATNB1, CDK5RAP2, KDM3A, OBFC1, GDI1, XRCC3, NFIX, CHD4, Pcnt, COX10, PKM, NUMB, RAPGEF6, TMEM216, MRE11A, TAOK1, BCAR1, ROR2, SP1, CIT, PHGDH, ARSB, RHOF, IFRD1, BLM, ACTN1, RASSF1, CALR, PAK4, S1PR2, MAPK9, DOCK7, GCC2, UBE3A, PRMT1, KIF24, LPAR1, SYNE3, DYM, PJA2, RTN3, WNT5A |
| E2F1     | Cellular Compromise                        | 1.42E-10    | NPM1, MCM8, ARID1A, SMARCD2, SMARCA4, SLX1A/SLX1B, MYC, SET, PIM1, SMARCB1, MCPH1, BRCA1, BLM, MCM9, RAD51C, BRIP1, POT1, CDC25A, TP53, PRKDC, NRAS, COPS5, FANCG, TUBG1, SMARCE1, SMARCD1, MDM2, HMGA1, FANCC, USP1, NBN, PALB2, MSH2, SUPT16H, RECQL4, H2AFX, CDKN1A, SMARCC1, FANCA, XRCC5, POLH                                                                                                                                                                                                                                                                                                                                                                                                                                                                                                                                                                                                                                                                                                                                                                                                                                                                                                                                                                                                                                                                                                                                                                                                                                                                                                                                                                                                                                                                                                                                                                                                                                                                                                                                                                                                                                                                                                                                                                                                                                                                                                                                                                                                                                                                                                                                                                                                                                                |

## Supplemental Table 7. General IPA functions for E2F1, E2F3A and E2F3B promoter targets

| ChIP-seq | Category                        | B-H p-value | Genes                                                                                                                                                                                                                                                                                                                                                                                                                                                                                                                                                                                                                                                                                                                                                                                                                                              |
|----------|---------------------------------|-------------|----------------------------------------------------------------------------------------------------------------------------------------------------------------------------------------------------------------------------------------------------------------------------------------------------------------------------------------------------------------------------------------------------------------------------------------------------------------------------------------------------------------------------------------------------------------------------------------------------------------------------------------------------------------------------------------------------------------------------------------------------------------------------------------------------------------------------------------------------|
| E2F1     | Post-Translational Modification | 3.46E-10    | RNF139,RNF8,GCHFR,AXIN1,UBR2,TGFBR3,HES1,CHAF1A,SCO2,RUSC1,CD2AP,AJUBA,MED21,VAMP3,CBFB,ANAPC11,TP53,HCFC1,NUP107,FANCC,HMGA1,MED12,SKP2,NDNL2,FBXW8,DAXX,RNF168,CCNF,NCLN,AHCTF1,COX18,FBXL6,PHF23,SUMO2,HPRT1,LTN1,PARD3,FANCA,CAPZA1,FYN,FBXO7,WWTR1,UVSSA,CUL1,STRA13,SPRTN,SF3B3,OGT,MTOR,TRIM27,CHAF1B,PRKCE,HJURP,NUP205,HEXIM1,NSMCE1,PCBP2,NFE2L2,AIFM1,GLMN,KPNA3,FMN1,TRIM28,CUL7,PLK1,MDM2,TRIM37,TSG101,CDK1,NUP153,AIMP2,NCAM1,BIRC2,CDKN2A,FOXRED1,PRPF19,FBXO25,SLF2,Wasl,RFWD3,FNIP2,FBXW7,FGFR3,FBXW2,SAE1,SIAH2,TSPAN4,BRCA1,HUWE1,BIRC6,PSMC4,KMT2A,EPRS,HERC2,CAND1,PIP5K1A,RNF4,ARRB2,UBE2G1,RC3H1,COMMD1,KLHL21,Paxip1,UBXN1,MED23,UBE2N,COX10,PIAS1,TNFAIP3,UHRF2,TRIM24,STUB1,GMNN,STX4,RPS3,NDUFAF3,RASSF1,NDUFAF4,MED18,CAPZB,SLC9A3R1,UHRF1,MAPK9,HERPUD1,SENP2,UBE3A,GAN,FANCL,XIAP,FAF1,PJA2,CDC34,WFS1,FANCI,TRIM59 |

## Supplemental Table 7. General IPA functions for E2F1, E2F3A and E2F3B promoter targets

| ChIP-seq | Category                    | B-H p-value | Genes                                                                                                                                                                                                                                                                                                                                                                                                                                                                                                                                                                                                                                                                                                                                                                                                                                                                                                                                                                                                                                                                                                                                                                                                                                                                                                                                                                                                                                                                                                                                                                                                                                                                                                                                                                                                                                                                                                                                                                                                                                                                                                                                                                                                                                                                                                                                                                                                                                                                                                                                                                                                                                                                                                                                                                                                                                                                                                                                                                                                                                                                                                                                                                                                                                                                                                                                                                                                                                                                                                                                                                                                                                                                                                                                                                                                                                                                                                                                                                                                                                                                                                                                                                                                                                                                                                                                                                                                                                                                                                                                                                                                                                                                                                                                                                                                                                                                                                                        |
|----------|-----------------------------|-------------|------------------------------------------------------------------------------------------------------------------------------------------------------------------------------------------------------------------------------------------------------------------------------------------------------------------------------------------------------------------------------------------------------------------------------------------------------------------------------------------------------------------------------------------------------------------------------------------------------------------------------------------------------------------------------------------------------------------------------------------------------------------------------------------------------------------------------------------------------------------------------------------------------------------------------------------------------------------------------------------------------------------------------------------------------------------------------------------------------------------------------------------------------------------------------------------------------------------------------------------------------------------------------------------------------------------------------------------------------------------------------------------------------------------------------------------------------------------------------------------------------------------------------------------------------------------------------------------------------------------------------------------------------------------------------------------------------------------------------------------------------------------------------------------------------------------------------------------------------------------------------------------------------------------------------------------------------------------------------------------------------------------------------------------------------------------------------------------------------------------------------------------------------------------------------------------------------------------------------------------------------------------------------------------------------------------------------------------------------------------------------------------------------------------------------------------------------------------------------------------------------------------------------------------------------------------------------------------------------------------------------------------------------------------------------------------------------------------------------------------------------------------------------------------------------------------------------------------------------------------------------------------------------------------------------------------------------------------------------------------------------------------------------------------------------------------------------------------------------------------------------------------------------------------------------------------------------------------------------------------------------------------------------------------------------------------------------------------------------------------------------------------------------------------------------------------------------------------------------------------------------------------------------------------------------------------------------------------------------------------------------------------------------------------------------------------------------------------------------------------------------------------------------------------------------------------------------------------------------------------------------------------------------------------------------------------------------------------------------------------------------------------------------------------------------------------------------------------------------------------------------------------------------------------------------------------------------------------------------------------------------------------------------------------------------------------------------------------------------------------------------------------------------------------------------------------------------------------------------------------------------------------------------------------------------------------------------------------------------------------------------------------------------------------------------------------------------------------------------------------------------------------------------------------------------------------------------------------------------------------------------------------------------------------------------|
| E2F1     | Reproductive System Disease | 7.82E-10    | RNF139,PPWD1,FRMD6,POR,XRCC2,AJUBA,TSC2,ZCCHC8,WWOX,SENP5,ETS1,CCNE2,PEAK1,NUP107,RANBP3,HIST1H2BM,ALCAM,NPHP3,ELMO2,PRDX4,DIABLO,RABL6,TIPARP,KDM6A,RBMX,ARHGAP19,VPS13B,ATN1,EXO1,SDHA,VPS16,CDS2,BUB1,WBP2,AP1G1,CDKN2A,HSD3B1,RSL1D1,E2F6,JUND,SMG6,CEP68,RAD54L,KCNAB2,PHRF1,BCL2L1,H3F3A/H3F3B,DZIP1L,ETAA1,KLF10,RAB23,PIAS1,RNASEH2B,CLUAP1,GPHN,SEC14L1,STPG2,TRIP13,TECPR2,LRRC40,ALKBH5,STK3,HTATSF1,RPS15,TUBB6,CENPI,E2F7,CAMTA1,ING1,SLC25A5,RPLP0,HNRNPL,MCM6,TUBA1B,CEP120,UBR2,TAPT1,PCDHGC3,ZNF436,XRCC1,HOOK3,HIST1H2AJ,ZGRF1,CBFB,SPECC1L,PRIM2,DNMT1,PABPC1,HMGA1,ZMYM6,SH3GL1,SUCO,EML5,NCLN,ARHGAP35,HAUS6,CANT1,CPSF2,SNAI2,CDT1,GPX1,TRIO,TYW1,GPR3,NEIL3,SCAF4,RINT1,TICRR,TXNL1,VCL,FKBP5,ZNF25,NSMCE1,NAP1L4,DUT,CEP152,PDE4DIP,USPL1,PLK1,TRIM37,TSG101,F3,RRM1,SENP1,ZNF546,MUM1,WDR25,ZFYVE19,NCAM1,CLUH,TMCO1,PYROXD1,FBXW7,TIGD3,TMEM242,FAM208A,YWHAQ,TMEM230,PPP1R7,PGP,MSL2,GOLGA1,STIL,BIRC6,ATP10A,MAT2B,RALBP1,NIN,PALB2,WHSC1L1,BRAT1,KBTBD8,UVRAG,CDK5RAP2,HIGD1A,SETDB2,IVS1,MRE11A,ZMIZ1,KIAA0825,MRPS27,ZFP90,TRIM24,POLR2A,ZNF664,UBE3A,C1orf174,NCAPH2,ZNF382,PTPRU,DSCC1,HIVEP1,ZDHH12,SLC25A32,TRIM59,TEX9,DDHD2,SCFD2,MYH9,WDR90,PCBP1,PPIL4,FAM208B,ODC1,ZFYVE1,ZC3H12C,MPHOSPH8,HIGD2A,FBLN1,GNE,TYMS,ASF1B,TUBGCP3,ESPL1,FAM118A,APPL2,BLVRA,MORC2,AACS,TFRC,ANKLE1,FRG1,RBM39,NOL7,FBXO10,PLXNA3,PEX3,ARL4C,HN1,HNRNPA2B1,ODF2L,CDK4,CTDSPL,DNAJC13,KIAA0754,TECR,NUF2,CDKN3,ZRSR2,OGT,MAP4,PRR14L,SOS1,LAPTM4A,DAB2,CD5L,NFE2L2,RAD21,RSBN1,DHX9,PHF6,DENND4A,HNRNPU,N4BP2L2,YKT6,MAPRE1,FUCA2,GNA12,RUBCN,LAMB2,CCNE1,ABCF2,GTF2H4,EIF4A1,CDKN1A,FOXN2,MAOA,HELQ,MEGF9,MSH3,TSFM,TLN1,RARG,MYC,TGFB2,STK4,RHOB,AMOTL2,FAM83B,XPO1,FIGLN1,PDCC6,CNOT6,TMCO3,KLF11,CLASP1,EIF4B,SMC3,USP28,DDX23,PNN,KIF4A,RBFOX2,TUSC3,BRD8,WDYHV1,PIP5K1A,TAF1,UGP2,USP32,GIPC1,MATN2,SEPT10,SORCS2,HSP90AA1,MAD1L1,NCKAP5L,SYN3,FAM83D,ACTN4,RBBP4,B2M,UBE2N,DENND4B,CFAP100,IGF2BP1,RAD50,RAD51,TRA2A,CCNA2,AKR1A1,SP3,DNAJC4,FYTTD1,ACAD8,NDUFS2,RPS3,VAR5,PRKCA,SLC20A1,POMT2,SDC1,HAUS8,AP1S2,XRN2,RALY,GAN,PSME3,RPA2,PRKCI,RIOK2,PHF19,SLC33A1,SPATS2,ZNF451,SFPQ,CDKN2C,RICTOR,FANCB,NCOA7,ZNF367,MTF1,HNRNPUL1,HAHDB,HEY2,THEM4,KMT2B,OTUD4,TMEM55B,FANCG,PSMD5,FANCC,RAD51D,RFC4,PI4K2A,E2F1,MSH5,LRP8,HELB,YEATS4,SUV39H2,WWTR1,RTKN2,CAMK2N2,TAX1BP3,CHEK1,TRIB1,MTOR,ADK,PRKCE,SOCS2,TBCD,ZWILCH,EPG5,RPS19,ICAM4,POLD1,PCDH9,RPIA,SIN3A,KIF15,mir-30,SPDYA,MCM2,CENPA,ADAM10,FEN1,ZFP36L2,SCAMP3,USP49,FZD7,FZR1,DIAPH3,FNIP2,CCNL1,STMN1,C19orf43,EZH2,PRND,SHAH2,HTRA2,NIPBL,RBL2,WDR34,PSMC4,RANBP1,MARS,DPP9,GSR,PANK1,TOP1MT,ARRB2,LCORL,mir-423,C1orf27,NFYC,PFAS,TMPO,RFC3,TAGLN2,TNRC6B,ZBTB7A,MED23,NUMB,MEIS2,RAPGEF6,NUP50,TAOK1,Ppp1cc,ENSA,CIT,OXCT1,LTBP4,RBM15,ARSB,S1PR2,RPS6KA5,ANAPC13,GNAI2,PPP6R1,DYM,SNRNP70,NUP62,PAQR4,HMGCR,SHMT2,MCM7,WNT5A,LGALS1,NPM1,AXIN1,POLA1,NUP133,SMA RCD2,EIF4A2,GSK3A,Ewsr1,EIF3B,MAP1A,TCERG1,SAFB,GRK4,HCFC1,NKTR,RGS19,RGP1,OGG1,GART,RAD1,DAXX,CNTRL,MB21D2,ECT2,CCDC138,NDST1,FANCA,EIF3K,GADD45B,BAG6,GNA11,SERHL2,SMARCA4,UGT2A1,PNRC1,C2CD5,KPNA3,TUBB4B,GAS1,IGF2R,ARID3A,MSH2,MAZ,FBXO5,KANSL2,KIF23,NAV2,SOCS3,MPRIP,YWHAH,PCDH18,MICALL2,RPGRIP1L,SMC1A,ZC3H14,RGPD4 (includes others),INTS3,CTSD,UFPS2,CHMP2A,SETD8,COL19A1,POLE4,STXBP1,MAN1C1,WEE1,BAMBI,AURKA,PTPRM,DYNLRB1,OSBPL8,OLA1,CAND1,GIN51,mir-210,CEP76,PPAT,ABCD1,LITAF,KIAA0101,BARD1,E2F3,IQGAP1,SEMA4C,GTPBP2,FARS2,RACGAP1,NFATC4,ALS2,BIRC5,MTO1,FANCL,C19orf47,CKS1B,BRCA2,CERCAM,CCP110,DEPDC1B,PLRG1,DSTN,mir-148,Cyb5r3,RBL1,MDH1,HIST1H2AB,EEF1D,PLPP5,SLC39A13,TAOK2,PYCR1,CNOT1,YWHAZ,HINT3,MTF2,JUNB,MON2,MED12,RAB31,UBE2G2,GAMT,AAAS,MYO9A,RTN4,CDK19,NEK2,BRPF3,FYN,GSTM5,BTG3,TMEM11,NRF1,PITRM1,EIF4G1,SF3B3,CORO2B,AKAP11,MCOLN1,STOM,CETN3,TRIM16,NUP205,CEP164,SUZ12,PPIF,SPC25,PLCG1,MDM2,SCAF11,CDK1,NHLRC2,GLTP,CIRBP,EML6,RBBP6,LRFN4,PFN1,FARP1,VPRBP,MNS1,SPRED2,AMD1,GSPT1,STAG1,TTLL12,FASN,HEXDC,TMUB2,FOSL2,TSPAN4,HIST1H3F,MCM5,GJA1,P4HB,ACSL3,TRIOBP,CASP3,ACOT13,POLE2,PPIG,USP38,NUBP1,HYLS1,MA PK8IP3,HERC2,Cdc42,NASP,SBNO2,TSNAXIP1,CDK2,LRRC14,KDM3A,ZFAT,SH3BP4,DDX39A,MRPS30,TMEM216,ANAPC1,SPSB1,IPO9,PRIM1,NFYA,CST F2T,GMNN,ZNF280B,TRNT1,OAZ1,GOT2,IFRD1,YLPM1,IPO5,RASSF1,EXOSC2,DNASE1L1,NRAS,UHRF1,TRA2B,PHLDA3,AVPI1,DOCK7,RFC5,PRMT1,PIA S3,NR1H2,Sf1,HIST1H2AM,MYH10,MAGED1,CAB39L,SCLT1,SMC5,HAUS4,CABIN1,EGR2,MTHFD2,ATF4,TARBP2,MAP3K2,TP53,SEMA5A,RRM2,TPM3,SM G5,ANO6,IKBIP,MYO1C,TBC1D14,SKP2,CNOT7,FSCN1,SUPT16H,CCNF,BTG2,NEK4,GAPDH,LTN1,ZNF780A,PARD3,XRCC5,NUP188,THADA,RNF130,KSR1,NOL12,KIF2C,DIS3,Rrbp1,PRKDC,CUL7,POLG,TDRKH,TUBA1A,RIC8B,DOPEY2,MBD3,VMP1,WRAP53,ILF3,MAP3K11,CCDC15,SMC4,STARD7,KIF16B,IFT1 40,LEMD3,FDFT1,TNRC6C,FBXW2,PIM1,MYBL2,CHTF18,BRIP1,MRPL34,LACTB,HUWE1,TXNDC16,PGK1,NBEAL2,HNRNPF,PELP1,SYNE2,IER2,GM2A,IPO 11,BUB1B,ATAD2,SLC3A2,CBX1,DUSP1,LMNB2,ARID1A,TBC1D8B,GTF2I,ABCF1,FASTKD3,GTF3A,GTF2A1,MIER1,CDCA7,CDC25B,POLR1C,FANCD2,WDF |

## Supplemental Table 7. General IPA functions for E2F1, E2F3A and E2F3B promoter targets

| ChIP-seq | Category              | B-H p-value | Genes                                                                                                                                                                                                                                                                                                                                                                                                                                                                                                                                                                                                                                                                                                                                                                                                                                                                                                                                                                                                                                                                                                                                                                                                                                                                                                                                                                                                                                                                                                                                                                                                                                                                                                                                                                                                                                                                                                                                                                                                                                                                                                                                                                                                                                                                                                                                                                                                                                                                                                                                                                                                                                                                                                                                                                                                                                                                                                                                                                                                                                                                         |
|----------|-----------------------|-------------|-------------------------------------------------------------------------------------------------------------------------------------------------------------------------------------------------------------------------------------------------------------------------------------------------------------------------------------------------------------------------------------------------------------------------------------------------------------------------------------------------------------------------------------------------------------------------------------------------------------------------------------------------------------------------------------------------------------------------------------------------------------------------------------------------------------------------------------------------------------------------------------------------------------------------------------------------------------------------------------------------------------------------------------------------------------------------------------------------------------------------------------------------------------------------------------------------------------------------------------------------------------------------------------------------------------------------------------------------------------------------------------------------------------------------------------------------------------------------------------------------------------------------------------------------------------------------------------------------------------------------------------------------------------------------------------------------------------------------------------------------------------------------------------------------------------------------------------------------------------------------------------------------------------------------------------------------------------------------------------------------------------------------------------------------------------------------------------------------------------------------------------------------------------------------------------------------------------------------------------------------------------------------------------------------------------------------------------------------------------------------------------------------------------------------------------------------------------------------------------------------------------------------------------------------------------------------------------------------------------------------------------------------------------------------------------------------------------------------------------------------------------------------------------------------------------------------------------------------------------------------------------------------------------------------------------------------------------------------------------------------------------------------------------------------------------------------------|
| E2F1     | Cell Morphology       | 7.82E-10    | NPM1,MYH10,RNF8,MCM8,PRPF19,MYH9,MNS1,TOR1A,RAN,LMNB1,CHAF1A,Tmsb4x (includes others),RCC1,CHMP2A,EZH2,EZR,TAOK2,BRCA1,SFR1,DNMT1,ETS1,TP53,SYNE2,ESPL1,SEPT7,DNA2,YWHAZ,RAC1,ORC6,RAD54L,RPA1,HELLS,TMOD3,AURKA,OGG1,PALB2,RNF4,RNF168,H3F3A/H3F3B,SMC2,XRCC6,H2AFX,RAD18,ECT2,XRCC5,FANCM,DEK,FN1,TCEA1,CHD4,UBE2N,HMG1,NEEDD1,TAOK1,IQGAP1,RAD50,CHEK1,RAD51,MAP4,NET1,GMNN,SIPA1,CEBPA,MCPH1,TOR1B,BLM,MCM9,EXO1,RASSF1,AIFM1,PRKDC,NUDCD3,TACC3,NRAS,GNA12,RACGAP1,CUL7,TUBG1,EMD,PLK1,TDRKH,FOXM1,BIRC5,TSG101,CDK1,NCAPG2,NBN,BUB1,RAD9A,CDKN1A,FBXO5,BRCA2                                                                                                                                                                                                                                                                                                                                                                                                                                                                                                                                                                                                                                                                                                                                                                                                                                                                                                                                                                                                                                                                                                                                                                                                                                                                                                                                                                                                                                                                                                                                                                                                                                                                                                                                                                                                                                                                                                                                                                                                                                                                                                                                                                                                                                                                                                                                                                                                                                                                                                            |
| E2F1     | Hematological Disease | 8.51E-10    | NPM1,PPWD1,POLA1,NUP133,POR,XRCC2,GLB1,TSC2,SMARCB1,WWOX,MAP1A,ETS1,NKTR,RANBP3,MSMO1,TCF3,OGG1,GART,TINF2,PSMD1,FANCA,HERPUD2,GADD45B,mir-331,CPD,PPIA,NUAK2,SMARCA4,DIABLO,KDM6A,PIK3C3,RBMX,PNRC1,PCNXL3,VPS13B,EXO1,ATN1,FKBP3,VPS16,TUBB4B,BUB1,KPNB1,MTHFD1L,RPS16,MSH2,RPL37,ACTL6A,CDKN2A,NAV2,MPRIP,LHX2,ZFP36L1,SMC1A,RGPD4 (includes others),E2F6,AK1,COQ6,POLE4,WEE1,CEP68,DNA2,RAD54L,AURKA,PTPRM,CDCA2,BCL2L1,KIAA0895L,mir-210,PPAT,HPS5,PIAS1,BARD1,DDX27,GPHN,PDCD10,IQGAP1,E2F3,LSM2,TBC1D1,STUB1,STPG2,NFATC4,G3BP1,ALS2,BIRC5,FANCL,TMEM109,BRCA2,CAMTA1,ING1,RPLP0,MCM6,TUBA1B,GLRX5,mir-148,RAN,ZNF436,RPS11,XRCC1,ZNF395,MPV17L2,ZGRF1,CBFB,PRIM2,TAOK2,DNMT1,PABPC1,PYCRL,UBXN6,YWHAZ,JUNB,HMGA1,MED12,SH3GL1,MTMR4,GAMT,CDAN1,ARHGAP35,FYN,SNAI2,UVSSA,GPX1,EMP2,CUL1,NRF1,PITRM1,EIF4G1,STOM,HK2,RINT1,VCL,NCBP3,ZNF526,CEP164,PDE4DIP,SUZ12,TRIM28,USPL1,PLCG1,MDM2,PLK1,NAP1L1,F3,CDK1,RHOBTB1,RRM1,SENP1,MUM1,NIPSNAP3A,KDELRL3,GPR180,CEP192,NCAM1,WDR48,PFN1,CNNM2,FBXW7,FAM208A,STAG1,FASN,GOLGA1,MCM5,CASP3,POLE2,RAC1,BIRC6,SLC25A37,CDC123,ATP10A,MUT,PALB2,WHSC1L1,Cdc42,C15orf41,RPS15A,LFNG,CDK5RAP2,CDK2,BRD2,GADD45G,TXLNA,MRE11A,ANAPC1,ZMIZ1,GTF2B,PRIM1,SIPA1,TRNT1,IPO5,DHX15,RASSF1,CNTLN,CALR,NRAS,SNRPB,TPST2,HAT1,SURF6,TCF7L1,UBE3A,ALG12,HIVEP1,PAPSS1,SLC25A32,LANCL2,MYH10,SCFD2,MAGED1,MYH9,WDR90,SMC5,RPL35A,FAM208B,ODC1,EGR2,ZC3H12C,ATF4,MGAT1,TARBP2,UNG,MAP3K2,TP53,TYMS,ESPL1,SEMA5A,RRM2,PPTC7,MDM1,KLF13,ZNF169,SKP2,CCNF,BTG2,NEK4,INVS,TFRC,GAPDH,RPL10,SRSF4,PARD3,FRG1,XRCC5,PRDX2,DEK,AKAP8,CCDC97,CDK4,BCL11B,MMS22L,KSR1,ZRSR2,ARF6,TMEM260,HJURP,SNRPD3,KIF2C,NFE2L2,DIS3,RAD21,PRKDC,PHF6,CUL7,MLF1,TUBA1A,CDKN1A,SH2B2,CCT7,SHMT1,CEP112,CSTF3,CASP7,NUTF2,FOXRED1,MSH3,GNB2L1,BAG3,RARG,AP2A2,KIF16B,MYC,TGFBR2,FDFT1,TNRC6C,RHOB,EIF3D,RCC1,PIM1,PPP3R1,FAM83B,XPO1,CACTIN,BRIP1,E4F1,HUWE1,SMC3,NBEAL2,SYNE2,DDX23,PNN,SH3BP1,HELLS,BUB1B,KMT2A,CBLB,TAF1,XRCC6,RECQL4,CDCA7L,MAD1L1,NDC80,RPSA,RBBP4,B2M,ARID1A,DENND4B,GTF2I,RAD50,RAD51,CCNA2,SHC1,POLR1C,FANCD2,LONP1,PRKCA,SLC20A1,SDC1,NMRAL1,TUBG1,FAR1,MTHFD1,FOXM1,PSME3,NBN,WDR91,MAPK14,PRKCI,RIOK2,C2CD2,SLC33A1,RAD9A,MSH6,SLC19A2,CDC34,FANCI,KIF18A,CEP85,CENPF,MZF1,TGFBR3,CDKN2C,HES1,ABHD11,CHAF1A,FANCB,MXD3,THRAP3,EZR,HADHB,EEFSEC,OSMR,HEY2,SARS2,TIMP2,CENPJ,UFP2,NDRG1,FANCG,NUFIP1,RPA1,FANCC,CTPS1,H2AFX,E2F1,AHCTF1,HPRT1,LRP8,HELB,CYR61,L3MBTL2,HIST1H1C,ADAM17,FN1,TCEA1,ATF7,CTNNA3,NUP214,CHEK1,ID1,TRIB1,MTOR,ADK,TOP2A,CEBPA,HSD17B12,STIM1,HEXIM1,RXR,PTEN,POT1,RPS19,FMN1,DCK,ACTB,PCDH9,POLD1,KITLG,FADD,RAD54B,mir-30,KIF20B,ADAM10,FEN1,ZFP36L2,FZD7,CLTB,AURKB,TUBB,VDAC2,STMN1,ROCK2,FGFR3,SRSF1,WRN,RPS20,EZH2,NIPBL,RAD51C,PPP6R3,BRCA1,KLF2,DLC1,ARHGAP24,CDC25A,RBL2,NONO,RPL3,STK11,ULK4,TBP,CCT6A,RANBP1,TMOD3,MARS,TPX2,GSR,ANAPC4,CASP2,SNX1,GNL3,CEP55,GDI1,XRCC3,NFIX,CHD4,COX10,NUMB,SLC7A1,POLI,TNFAIP3,RAPGEF6,TAOK1,PRKAG1,LCA5,ROR2,SP1,PMF1/PMF1-BGLAP,MAML3,ATF6B,RBM15,BLM,ANKLE2,E2F8,S1PR2,MAPK9,USP1,GCC2,XIAP,FDPS,EXOC4,PBX3,SNRNP70,ARHGAP31,CAD,SMARCC1,HMGCR,SHMT2,WNT5A,LGALS1 |

## Supplemental Table 7. General IPA functions for E2F1, E2F3A and E2F3B promoter targets

| ChIP-seq | Category              | B-H p-value | Genes                                                                                                                                                                                                                                                                                                                                                                                                                                                                                                                                                                                                                                                                                                                                                                                                                                                                                                                                                                                                                                                                                                                                                                                                                                                                                                                                                                                                                                                        |
|----------|-----------------------|-------------|--------------------------------------------------------------------------------------------------------------------------------------------------------------------------------------------------------------------------------------------------------------------------------------------------------------------------------------------------------------------------------------------------------------------------------------------------------------------------------------------------------------------------------------------------------------------------------------------------------------------------------------------------------------------------------------------------------------------------------------------------------------------------------------------------------------------------------------------------------------------------------------------------------------------------------------------------------------------------------------------------------------------------------------------------------------------------------------------------------------------------------------------------------------------------------------------------------------------------------------------------------------------------------------------------------------------------------------------------------------------------------------------------------------------------------------------------------------|
| E2F1     | Immunological Disease | 8.51E-10    | NPM1,MAGED1,PPWD1,POLA1,ODC1,POR,XRCC2,EGR2,SMARCB1,WWOX,TSC2,TARBP2,UNG,MAP3K2,TYMS,ETS1,TP53,ESPL1,SEMA5A,RRM2,RANBP3,KLF13,TCF3,OGG1,SKP2,GART,CCNF,BTG2,NEK4,GAPDH,PSMD1,FRG1,XRCC5,GADD45B,AKAP8,mir-331,CCDC97,CDK4,BCL11B,NUAK2,SMARCA4,KSR1,DIABLO,PNRC1,PCNXL3,KIF2C,DIS3,NFE2L2,EXO1,ATN1,FKBP3,PRKDC,KHDRBS1,TUBB4B,KPNB1,MTHFD1L,TUBA1A,MSH2,CDKN1A,CCT7,CEP112,CSTF3,NUTF2,CASP7,CDKN2A,FOXRED1,MSH3,RARG,MYC,FDFT1,RCC1,PIM1,PPP3R1,XPO1,POLE4,DNA2,RAD54L,AURKA,BUB1B,CDCA2,BCL2L1,TAF1,XRCC6,RECQL4,CDCA7L,mir-210,HSP90AA1,NDC80,MAD1L1,PPAT,B2M,ARID1A,GTF2,IQGAP1,RAD50,LSM2,POLR1C,CCNA2,STUB1,LONP1,PRKCA,SDC1,TUBG1,G3BP1,PSME3,BIRC5,NBN,TMEM109,PRKCI,RIOK2,SLC33A1,RAD9A,MSH6,BRCA2,CDC34,ING1,MZF1,mir-148,RAN,CDKN2C,CHAF1A,MXD3,OSMR,PRIM2,SARS2,TIMP2,PABPC1,PYCRL,YWHAZ,RPA1,JUNB,HMGA1,MED12,H2AFX,E2F1,HPRT1,HELB,CYR61,HIST1H1C,FYN,FN1,CUL1,EMP2,CHEK1,ID1,MTOR,RINT1,CEBPA,TOP2A,STIM1,RXR, POT1,DCK,PLCG1,MDM2,NAP1L1,POLD1,CDK1,RRM1,FADD,RAD54B,mir-30,MUM1,FEN1,NCAM1,FBXW7,AURKB,TUBB,VDAC2,FGFR3,ROCK2,STMN1,FASN,EZH2,NIPBL,BRCA1,PPP6R3,MCM5,RBL2,NONO,CASP3,POLE2,STK11,RAC1,BIRC6,CDC123,RANBP1,TPX2,GSR,Cdc42,CASP2,SNX1,LFNG,CDK2,BRD2,GADD45G,TXLNA,TNFAIP3,POLI,MRE11A,TAOK1,ROR2,HSP90B1,GTF2B,PRIM1,PMF1/PMF1-BGLAP,BLM,IPO5,ANKLE2,RASSF1,S1PR2,NRAS,TPST2,SNRPB,HAT1,MAPK9,TCF7L1,UBE3A,XIAP,FDPS,EXOC4,CAD,SMARCC1,HMGCR,SHMT2,LANCL2,LGALS1,WNT5A                                                     |
| E2F1     | Tissue Morphology     | 1.23E-09    | NPM1,MYH9,AXIN1,ODC1,POR,XRCC2,TSC2,TP53,CCNE2,KLF13,DAXX,CCNF,TFRC,HIST1H1D,NDST1,ECT2,PRDX2,PIM3,BAG6,GNA11,CDK4,HOXC9,SMARCA4,PELO,KDM6A,PIK3C3,SOS1,DAB2,NFE2L2,DHX9,GAS1,IGF2R,ARID3A,PES1,CCNE1,MTHFD1L,MSH2,CDKN1A,FBXO5,SHMT1,CDKN2A,SOCS3,LHX2,ZFP36L1,KXD1,TLN1,RPGRIP1L,RARG,MYC,TGFBR2,STK4,PIM1,PPP3R1,MYBL2,PPP1R15B,NBEAL2,AURKA,BCL2L1,GINS1,RC3H1,COMMD1,NAGLU,FZD5,Gm15807/Hmgn5,ARID1A,RAB23,CLUAP1,SEMA4C,RAD51,SHC1,FANCD2,RAD17,OPA1,ARC,SLC20A1,POMT2,NFATC4,FOXO1,STK3,MTHFD1,BIRC5,NBN,PRKCI,MAPK14,RAD9A,E2F7,KLF5,BRCA2,SLC19A2,BRPF1,PCGF2,UBR2,SOX12,CDKN2C,POU3F2,HES1,PHACTR4,RBL1,XRCC1,CBFB,HEY2,APEX2,DNMT1,CENPJ,KMT2B,TIMP2,Irx5,SNX13,COPS5,ANGPTL6,SNAI1,HIRA,FANCC,RAD51D,MED12,GAB1,E2F1,AHCTF1,ARHGAP35,LRP8,MAPK7,HIST1H1C,ADAM17,FN1,H2AFZ,ID1,MTOR,CEBPA,PRKCE,MCPH1,VCL,RXR,GLMN,RPS19,DCK,SUZ12,TRIM28,CENPU,PLCG1,MDM2,COPS3,F3,TSG101,KITLG,SENP1,LIMS1,KIF20B,ADAM10,FEN1,ZFP36L2,FZR1,PFN1,MAPK1,WasI,MMP16,DIAPH3,NR2F2,FBXW7,ROCK2,WRN,EZH2,BRCA1,KLF2,DLC1,CDC25A,RBL2,STIL,CASP3,STK11,RAC1,BIRC6,TMOD3,MAPK8IP3,PALB2,ARRB2,Cdc42,SNX1,LFNG,TMPO,Paxip1,CDK2,INCENP,ZFAT,RAB27B,NUMB,SLC7A1,ZMIZ1,PRKAG1,ROR2,HSP90B1,GMNN,SIPA1,MAML3,RBM15,BLM,E2F8,PAK4,NRAS,S1PR2,TRA2B,UHRF1,HAT1,MAPK9,TCF7L1,NR1H2,SMARCC1,WNT5A                                                                                                                                                                               |
| E2F1     | Tissue Development    | 1.79E-09    | NPM1,MYH10,MYH9,FRMD6,SLC9A1,XRCC2,Diap2,Tmsb4x (includes others),GLB1,SMARCB1,FBLN1,TSC2,MAP1A,ATF4,SAFB,TP53,ESPL1,TPM3,MDM1,SKP2,CNOT7,CCNF,PRDX4,GNA11,HNRNPA2B1,CDK4,BCL11B,SMARCA4,KSR1,OGT,B4GALT7,ARF6,KDM6A,ALMS1,PIK3C3,SOS1,ARHGAP19,DAB2,KIF2C,NFE2L2,PRKDC,KHDRBS1,MAPRE1,GNA12,ARID3A,BUB1,CCNE1,MTHFD1L,CDKN1A,FBXO5,SHMT1,AKAP1,CDKN2A,SOCS3,DLGAP5,MPRIIP,LHX2,MICALL2,RPGRIP1L,RARG,MYC,TGFBR2,CTSD,STK4,RHOB,FIGNL1,JUND,MYBL2,CLASP1,PGK1,HUWE1,SMC3,KANK2,WEE1,AURKA,KMT2A,SLC3A2,BCL2L1,PIP5K1A,DUSP1,RC3H1,POLL,INPP5K,PPAT,RBBP4,RND1,ARID1A,KLF10,RAB23,RNASEH2B,CLUAP1,PTGES3,SEMA4C,HDGF,TOM1L1,CDC25B,CCNA2,FANCD2,NET1,OPA1,RPS3,MCM9,PRKCA,TACC3,CAPZB,SMARCE1,EMD,FOXO1,MTHFD1,PSME3,BIRC5,PPM1G,NBN,PRKCI,MAPK14,KLF5,BRCA2,BRPF1,CENPF,PCGF2,DSTN,CDKN2C,PHACTR4,Cyb5r3,RICTOR,RBL1,SNIP1,CBFB,CENPJ,TIMP2,Irx5,NDRG1,JUNB,FANCC,HMGA1,MED12,PLA2G6,GAB1,E2F1,ARHGAP35,CYR61,FYN,FN1,SNAI2,SUV39H2,HMGN1,SP2,AKAP11,ID1,MTOR,YY1,CREB1,CEBPA,TRIM16,PRKCE,TBCD,VCL,GLMN,FMN1,ACTB,HDGFRP2,CDC6,MDM2,PLK1,TSG101,SIN3A,CDK1,RRM1,FADD,KITLG,CIRBP,KIF20B,FEN1,RBPJ,FZR1,MCM8,ERCC6,PFN1,TFG,MAPK1,ARF1,WasI,DIAPH3,FBXW7,TUBB,AURKB,LMNB1,STMN1,FGFR3,ROCK2,WRN,LPAR2,STAG1,EZH2,FASN,BRCA1,FOSL2,KLF2,DLC1,SSNA1,GJA1,RBL2,STIL,CASP3,STK11,RAC1,TMOD3,FOXC1,BAG4,TOP1MT,Cdc42,CCNG2,GNL3,CDK2,PA2G4,GADD45G,STXB4,BCAR1,ZMIZ1,TRIM24,NFYA,GMNN,SORBS3,BLM,RASSF1,PAK4,S1PR2,NRAS,UHRF1,HAT1,MAPK9,GNAI2,LPAR1,WNT5A,LGALS1 |

## Supplemental Table 7. General IPA functions for E2F1, E2F3A and E2F3B promoter targets

| ChIP-seq | Category                          | B-H p-value | Genes                                                                                                                                                                                                                                                                                                                                                                                                                                                                                                                                                                                                                                                                                                                                                                                                                                                                                                                                                                                                                                                                                                                                                                                                                                                                                                                                                                                                                                                                                                                                                                                                                                                                                                                                                                                                                                                                                                                                               |
|----------|-----------------------------------|-------------|-----------------------------------------------------------------------------------------------------------------------------------------------------------------------------------------------------------------------------------------------------------------------------------------------------------------------------------------------------------------------------------------------------------------------------------------------------------------------------------------------------------------------------------------------------------------------------------------------------------------------------------------------------------------------------------------------------------------------------------------------------------------------------------------------------------------------------------------------------------------------------------------------------------------------------------------------------------------------------------------------------------------------------------------------------------------------------------------------------------------------------------------------------------------------------------------------------------------------------------------------------------------------------------------------------------------------------------------------------------------------------------------------------------------------------------------------------------------------------------------------------------------------------------------------------------------------------------------------------------------------------------------------------------------------------------------------------------------------------------------------------------------------------------------------------------------------------------------------------------------------------------------------------------------------------------------------------|
| E2F1     | Organismal Development            | 7.87E-09    | MYH10,NPM1,DNAJC3,ODC1,ADH5,POR,XRCC2,RCL1,Tmsb4x (includes others),GLB1,AJUBA,SMARCB1,TSC2,MGAT1,TARBP2,TP53,CCNE2,ESPL1,KLF13,ATE1,DAXX,CCNF,SUMO2,TFRC,ECT2,XRCC5,PRDX2,NOL7,PIM3,CDK4,SMARCA4,KSR1,PELO,KDM6A,PIK3C3,ARHGAP19,SOS1,DAB2,NFE2L2,PRKDC,GAS1,GNA12,MAPRE1,CUL7,IGF2R,ARID3A,LAMB2,PES1,CCNE1,MTHFD1L,MSH2,EIF4A1,CDKN1A,FBXO5,SHMT1,PLEKHA1,MAOA,CDKN2A,SOCS3,LHX2,GNB2L1,ZFP36L1,KXD1,TLN1,RPGRIP1L,RARG,RGPD4 (includes others),TGFB2,MYC,FDFT1,CTSD,STK4,TNRC6C,PIM1,JUND,MYBL2,TAB1,PPP1R15B,NBEAL2,AURKA,KMT2A,BCL2L1,PIP5K1A,GINS1,RC3H1,LMNB2,HS P90AA1,Gm15807/Hmgn5,ALG14,NMT1,ARID1A,IDH3G,RAB23,CLUAP1,E2F3,PDCC10,RAD50,IGF2BP1,SEMA4C,TOM1L1,RAD51,SHC1,SP3,FANCD2,OPA1,ARC,PRKCA,WDR4,SLC20A1,POMT2,CAPZB,TUBG1,EMD,NFATC4,STK3,FOXO1,MTHFD1,PSME3,BIRC5,NBN,MAPK14,RAD9A,KIF5B,SLC33A1,KLF5,E2F7,BRCA2,BRPF1,SLC19A2,SLC25A5,MZF1,PCGF2,ARV1,UBR2,TGFB3,CDC7,RAN,mir-148,CDKN2C,HES1,PHACTR4,RBL1,XRCC1,CHAF1A,MXD3,PTP4A2,TARDBP,KARS,IRS2,CBFB,HEY2,APEX2,DNMT1,CENPJ,TIMP2,CNOT1,Irx5,TOBP1,SNX13,CSR2,COPS5,TKT,HIRA,SNAI1,MTF2,JUNB,HMGA1,FANCC,MED12,GAB1,YARS,E2F1,AHCTF1,ARHGAP35,MAPK7,FYN,ADAM17,FN1,ATF7,SUV39H2,WWTR1,CUL1,CTNNA3,HMGN1,NRF1,SP2,H2AFZ,SRSF10,CHEK1,ID1,NEIL3,MTOR,YY1,RINT1,PTS,CREB1,TRIM16,SOCS2,PRKCE,MCPH1,STIM1,HEX1M1,VCL,PCBP2,AIFM1,GLMN,RPS19,SUZ12,DCK,TIAL1,PLCG1,MDM2,PLK1,F3,COPS3,TSG101,CDK1,FADD,KITLG,SENP1,mir-30,LIMS1,KIF20B,FEN1,RBPJ,ZFP36L2,RBBP6,NCAM1,WDR48,FZR1,PNO1,PRPF19,ERCC6,PFN1,MAPK1,Wasl,DIAPH3,FBXW7,AURKB,LMNB1,AMD1,FGFR3,ROCK2,WRN,EZH2,MID1IP1,FOSL2,BRCA1,DLC1,KLF2,CDC25A,GJA1,RBL2,STIL,CASP3,STK11,TBP,PSMC4,RAC1,BIRC6,RANBP1,TMOD3,MAPK8IP3,FOXC1,SEL1L,PALB2,NASP,Cdc42,TIMELESS,CASP2,SNX1,LFNG,GNL3,TMPO,Paxip1,CDK2,INCENP,ZFAT,Pcnt,RAB27B,NUMB,PPP1CB,SLC7A1,BCAR1,PRKAG1,TRIM24,HSP90B1,SP1,NFYA,GMNN,CIT,SIPA1,RBM15,BLM,STK40,DHX15,E2F8,SLC25A25,CALR,PAK4,S1PR2,NRAS,TPST2,UHRF1,MAPK9,USP1,TCF7L1,LPAR1,SMARCC1,LGALS1,WNT5A |
| E2F1     | Connective Tissue Disorders       | 1.19E-08    | AXIN1,SLC9A1,CABIN1,SKIV2L,POR,XRCC2,EGR2,EIF3B,WWOX,SMARCB1,TSC2,ATF4,UNG,TYMS,ETS1,TP53,CRKL,SKP2,DAXX,RPL10,NDST1,GADD45B,AKAP8,BAG6,CDK4,TNFAIP8L1,HOXC9,NUAK2,SMARCA4,KSR1,DIABLO,MAP4,KDM6A,SOS1,NFE2L2,ATN1,PRKDC,DENND4A,KHDRBS1,GAS1,CUL7,VPS26A,IGF2R,BUB1,MTHFD1L,CCNE1,TMEM107,MSH2,CDKN1A,RPL37,POC1A,CASP7,CDKN2A,RPGRIP1L,RARG,SC5D,RGPD4 (includes others),MYC,TGFB2,CTSD,STK4,RHOB,PIM1,SNN,JUND,MYBL2,CLASP1,ESCO2,SMC3,ORC6,DNA2,LZTR1,KMT2A,BCL2L1,TFAM,DUSP1,XRCC6,RECQL4,MAD1L1,LMNB2,SF3B4,PIDD1,ARID1A,RAB23,PIAS1,POLR1C,FANCD2,STUB1,CABLES2,OPA1,GMFB,PRKCA,TACC3,EMD,SENP2,NFATC4,MTHFD1,BIRC5,NBN,FAM111A,MAPK14,COX5A,BRCA2,ZNF346,PCGF2,PLRG1,TGFB3,CDKN2C,HES1,RBL1,MTF1,SNIP1,SPECC1L,DNMT1,CENPJ,FANCG,COPS5,SNAI1,YWHAZ,RAD51D,MED12,GAB1,MBD4,E2F1,GNB2,RTN4,ARHGAP35,CYR61,FYN,SNAI2,FN1,GSTM5,CDT1,GPX1,EMP2,BOK,CHEK1,ID1,MTOR,YY1,CREB1,TOP2A,MCPH1,TCTN3,NSMCE1,AIFM1,ORC1,EPG5,CEP152,ACTB,CDC6,DLX1,PLCG1,MDM2,POLD1,C1orf159,TSG101,CDK1,FADD,SENP1,RBPJ,BIRC2,ERCC6,MAPK1,VPRBP,INSIG1,TMCO1,MMP16,UNC5B,LMNB1,STMN1,FGFR3,SIVA1,WRN,LPAR2,ITPRIP,HTRA2,BRCA1,KLF2,P4HB,RBL2,STIL,CASP3,BIRC6,RAC1,RALBP1,CASC5,PALB2,NIN,ARRB2,PKD1,CASP2,EIF4A3,SNX1,PTPRS,LFNG,GNL3,CDK5RAP2,CREBL2,TNFAIP3,ROR2,PHGDH,OAZ1,Pvr,BLM,CALR,NRAS,SNRPB,MAPK9,RPS6KA5,GNAI2,FAF1,NR1H2,PBX3,LPAR1,SMARCC1,WNT5A,CASP8AP2                                                                                                                                                                                                                                                                                                                                                                                                                                                                                                                                                                                                |
| E2F1     | Molecular Transport               | 1.75E-08    | CDKN2A,NPM1,AHCYL1,DDX39A,NUP133,HNRNPA2B1,RAN,THOC3,XPOT,NUP214,SLBP,RGPD4 (includes others),RITA1,EGR2,FYTTD1,XPO1,SARNP,UPF2,CALR,SMG6,NUP155,KHDRBS1,HSPA9,NCBP1,ALKBH5,NUP107,SMG5,NXT1,SRSF3,PKD1,DDX39B,THOC7,SRSF7,SMG7,NUTF2,XPO6                                                                                                                                                                                                                                                                                                                                                                                                                                                                                                                                                                                                                                                                                                                                                                                                                                                                                                                                                                                                                                                                                                                                                                                                                                                                                                                                                                                                                                                                                                                                                                                                                                                                                                          |
| E2F1     | RNA Trafficking                   | 4.21E-08    | DDX39A,NUP133,HNRNPA2B1,RAN,THOC3,XPOT,NUP214,SLBP,RGPD4 (includes others),FYTTD1,XPO1,SARNP,UPF2,SMG6,NUP155,KHDRBS1,NCBP1,ALKBH5,NUP107,SMG5,NXT1,SRSF3,DDX39B,THOC7,SRSF7,SMG7                                                                                                                                                                                                                                                                                                                                                                                                                                                                                                                                                                                                                                                                                                                                                                                                                                                                                                                                                                                                                                                                                                                                                                                                                                                                                                                                                                                                                                                                                                                                                                                                                                                                                                                                                                   |
| E2F1     | Cellular Response to Therapeutics | 1.22E-07    | CDKN2A,HIST1H1C,MCM8,ERCC6,GPX1,HMGN1,RAD50,RAD51,SHC1,XRCC2,MXD3,WRN,MTF1,CC2D1A,MCPH1,MYBL2,STIM1,BRCA1,MCM9,APEX2,NFE2L2,UNG,TP53,PRKDC,PAFAH2,PPIF,CASP3,RAD54L,HELLS,FANCC,RAD51D,XIAP,NBN,RAD54B,MSH2,XRCC6,CDKN1A,BRCA2,FEN1,SLC25A10,ING1,Paxip1,XRCC5,PRDX2,POLH                                                                                                                                                                                                                                                                                                                                                                                                                                                                                                                                                                                                                                                                                                                                                                                                                                                                                                                                                                                                                                                                                                                                                                                                                                                                                                                                                                                                                                                                                                                                                                                                                                                                           |

**Supplemental Table 7. General IPA functions for E2F1, E2F3A and E2F3B promoter targets**

| ChIP-seq | Category                     | B-H p-value | Genes                                                                                                                                                                                                                                                                                                                                                                                                                                                                                                                                                                                                                                                                                                                                                                                                                                                                                                                                                                                                                                                                                                                                                                                                                                                                                                                                                                                                                                                                                                                                                                                                                                                                                                                                                                                                                                             |
|----------|------------------------------|-------------|---------------------------------------------------------------------------------------------------------------------------------------------------------------------------------------------------------------------------------------------------------------------------------------------------------------------------------------------------------------------------------------------------------------------------------------------------------------------------------------------------------------------------------------------------------------------------------------------------------------------------------------------------------------------------------------------------------------------------------------------------------------------------------------------------------------------------------------------------------------------------------------------------------------------------------------------------------------------------------------------------------------------------------------------------------------------------------------------------------------------------------------------------------------------------------------------------------------------------------------------------------------------------------------------------------------------------------------------------------------------------------------------------------------------------------------------------------------------------------------------------------------------------------------------------------------------------------------------------------------------------------------------------------------------------------------------------------------------------------------------------------------------------------------------------------------------------------------------------|
| E2F1     | Renal and Urological Disease | 1.50E-07    | RNF139,RNF8,PCBP1,SMARCD2,EIF4A2,FAM208B,SECISBP2,ODC1,POR,SNRNP48,MPHOSPH8,GLB1,AJUBA,SMARCB1,TSC2,TCERG1,SARNP,TP53,GN E,TYMS,PAPD4,SEMA5A,RRM2,RANBP3,ZBTB5,OGG1,ZC3H18,GART,SP4,BTG2,HIST1H1D,PSMD1,ZNF780A,FRG1,STRIP2,PRDX2,SSSCA1,FBXO7,AKAP 8,BAG6,GNA11,ESYT1,CDK4,CTDSPL,MFSD5,SMARCA4,TMEM209,UGT2A1,PELO,POFUT2,KDM6A,BTAF1,NFE2L2,RAD21,HIST2H3D,PHF6,POLG2,TUBB4 B,CDH6,POLG,SLC29A1,TUBA1A,DOPEY2,MBD3,CDKN1A,C6orf62,CDKN2A,KIF23,DLGAP5,NAV2,ILF3,CCDC15,PCDH18,HELQ,TROAP,ZFP36L1,TSMF,TL N1,RARG,BPGM,RGPD4 (includes others),SMC1A,MYC,TGFBR2,FDFT1,RHOB,UFSP2,CACTIN,SMC3,POLE4,SYNE2,ZNF706,BLVRB,RBFOX2,AURKA,BUB1B,KMT2A,KIAA0907,BCL2L1,TAF1, UGP2,mir-210,CEP76,HSP90AA1,SYN3,ABCD1,B2M,ARID1A,TBC1D8B,FASTKD3,GPHN,SPSB3,E2F3,HNRNPK,POLR1C,WDFY3,FANCD2,TBC1D1,TUBG1,PRDM4,SM ARCD1,NMT2,BIRC5,MAPK14,KLF5,SMG7,BRCA2,CDC34,SLC25A5,CENPF,PLRG1,GTFC3,TOR1A,CDKN2C,RBL1,ABHD11,THRAP3,HADHB,CBFB,IRS2,R FX3,KMT2B,TIMP2,PABPC1,OTUD4,SNX13,CCDC91,SH3GL1,EAPP,RNF168,PI4K2A,BSG,E2F1,ZNF672,DNAJC14,ARHGAP35,MAPK7,HELB,CDK19,CYR61, FH,SGOL1,CANT1,BRPF3,HIST1H1C,ADAM17,KLHL18,FN1,ATF7,BTG3,SUV39H2,DUSP6,CUL1,GPX1,XPOT,NUP214,HMGB2,PITRM1,ATAD5,TYW1,SGMS1 ,TRIB1,YY1,MTOR,RNPS1,TICRR,TOP2A,CEBPA,TRIM16,PRKCE,VCL,KHSRP,PDE4DIP,ACTB,MDM2,PLK1,ATXN2L,ZBTB11,SIN3A,ZNF519,CCDC109B,RR M1,KIF15,ZNF516,NUP153,MCM2,KIF20B,NOP2,CEP192,ZFP36L2,ZFYVE19,NAGK,MAPK1,NR2F2,FBXW7,TUBB,AURKB,FGFR3,GSPT1,TMEM230,ASXL2,E ZH2,DLST,HEXDC,NIPBL,SIH2,HTRA2,PUF60,BRCA1,RAD51C,DLCL1,SSNA1,ACSL3,NONO,TRIOBP,NUP155,CASP3,POLE2,STK11,NUBP1,TBP,NDUFAF2, RALBP1,PANK1,ANAPC4,NASP,PKD1,CASP2,KBTBD8,CDK2,CDK5RAP2,KDM3A,ZFAT,PKM,POLI,MRE11A,TMEM216,RSRP1,C12orf45,UHRF2,HSP90B1,P CK2,ADAL,GEMIN4,GMNN,DSCR3,BLM,YLPM1,IDH3B,RASSF1,CALR,NRAS,TPST2,PHLDA3,NFKBIZ,FDPS,PIAS3,GFOD1,PPP6R1,LPAR1,NUP62,SMARCC 1,HMGCR |
| E2F1     | Protein Synthesis            | 2.06E-06    | RNF139,NPM1,RNF8,GCHFR,MYH9,PCBP1,AXIN1,GSK3A,EIF4A2,ODC1,SCO2,EIF3B,AJUBA,TSC2,ETF1,VAMP3,ATF4,TARBP2,TP53,HCFC1,RGS19,ESPL 1,NUP107,TCF3,SKP2,HSPA8,CNOT7,EIF4H,MRPL17,BTG2,COX18,GAPDH,PARD3,FANCA,SPPL2A,EIF3K,FBXO7,BAG6,CDK4,OGT,TRIM27,TIPARP,RBMX ,TP53INP2,HJURP,GTf2H3,DHX9,STX12,KPNA3,KHDRBS1,MRPL12,NCBP1,LARP4B,HNRNPD,DDX39B,EIF4A1,RPL37,CASP7,CDKN2A,FOXRED1,SOCS3,I LF3,SLF2,GNB2L1,ZFP36L1,BAG3,TSFM,MYC,STK4,CTSD,FBXW2,TOMM7,UFSP2,EIF3D,PIM1,XPO1,EIF4B,STXBP1,AURKA,SNX3,KMT2A,CBLB,BCL2L1,PI P5K1A,GIPC1,EDEM1,NAGLU,FAM83D,PPAT,UBXN1,UBE2N,RAB23,ABCF1,PDCD10,HNRNPK,IGF2BP1,STUB1,STX4,RPS3,LONP1,PRKCA,NDUFAF4,SDC 1,CAPZB,SLC9A3R1,HERPUD1,CANX,SEN2,CNOT8,STK3,PSME3,PPM1G,QRSL1,WFS1,HNRNPL,TGFBR3,UBR2,HES1,RBL1,CHAF1A,PCOLCE,CD2AP,D NMT1,TIMP2,PABPC1,CNOT1,COPS5,SERINC1,HMGA1,FANCC,JUNB,UBE2G2,PTBP1,RNF168,NCLN,AHCTF1,FBXL6,ZSWIM7,CAPZA1,FYN,ADAM17,FN1, PITRM1,EIF4G1,SF3B3,H2AFZ,MTOR,DHPS,CHAF1B,CREB1,EIF3A,SOCS2,NUP205,SARS,AIFM1,FMN1,AZIN1,BANP,MDM2,PLK1,TSG101,TRIM37,CDK1,F ADD,SEN1,NUP153,CIRBP,ADAM10,NCAM1,FZR1,PFN1,MAPK1,Wasl,DIAPH3,MMP16,FNIP2,FBXW7,LOC102724828/MRPL23,RPS20,HTRA2,SIH2,NAA1 6,TSPAN4,KLF2,Fus,GJA1,CDC37,CASP3,PSMC4,EIF2S3,MARS,EPRS,SEL1L,ARRB2,Cdc42,CASP2,UBE2G1,EIF4A3,SNX1,RPS15A,CREBL2,TNRC6B,COX 10,TNFAIP3,SLC7A1,STXBP4,HSP90B1,UHRF2,TRIM24,IPO9,ZBED3,NLK,SP1,GMNN,OAZ1,LTBP4,NACA,RASSF1,NDUFAF3,CALR,NRAS,RPL30,NXT1,UBE 3A,XIAP,FAF1,RPS4Y1,NR1H2,RPS27L,SNRNP70,EIF3L,WNT5A                                                                                                                                                                                                                                                                                                                                                                       |
| E2F1     | Hereditary Disorder          | 2.38E-06    | CDKN2A,MYH10,MYH9,RPL35A,SMC1A,TGFBR2,XRCC2,FANCB,TSC2,SMARCB1,NIPBL,SEC63,BRIP1,RAD51C,BRCA1,TP53,SMC3,CCNE2,STK11,FANCG, LZTR1,FANCC,RAD51D,KMT2A,PALB2,E2F1,FH,FANCA,SPRED1,BARD1,GPX1,CDK4,MRE11A,PDCD10,RAD50,RAD51,MTOR,FANCD2,SOS1,BLM,RAD21,P RKCA,GLMN,SDHA,RPS19,NRAS,TAF6,PLCG1,FANCL,NBN,CCNE1,MSH2,MSH6,BRCA2,FANCI                                                                                                                                                                                                                                                                                                                                                                                                                                                                                                                                                                                                                                                                                                                                                                                                                                                                                                                                                                                                                                                                                                                                                                                                                                                                                                                                                                                                                                                                                                                  |
| E2F1     | Neurological Disease         | 1.44E-05    | NPM1,AXIN1,POLA1,CDKN2C,HES1,POR,XRCC2,EGR2,AJUBA,TSC2,SMARCB1,IRS2,CENPJ,KMT2B,TYMS,PABPC1,TP53,CSR2,RRM2,EXOSC8,MBD2,G ART,RAD1,LARGE,CCNF,E2F1,BTG2,ARHGAP35,ALCAM,TINF2,NDST1,FRG1,ECT2,XRCC5,HIST1H1C,FN1,CDT1,BAG6,ARL4C,HNRNPA2B1,GNA11,CDK4, TRIO,NUAK2,SMARCA4,CDKN3,YY1,MTOR,KDM6A,E2F5,TOP2A,MCPH1,B3GALNT2,POT1,RAD21,ORC1,EPG5,PHF6,CEP152,GAS1,CDC6,MDM2,VPS26A, POLD1,SIN3A,RRM1,MTHFD1L,CLK4,TUBA1A,mir-30,SF3B2,MSH2,CDKN1A,MAZ,RBPJ,CASP7,NCAM1,CDKN2A,FOXRED1,ERCC6,LHX2,CLTB,FBXW7,RPGRIP1L,TUBB,LMNB1,SMC1A,FGFR3,TGFBR2,MY C,E2F6,PIM1,TSEN54,EZH2,BRCA1,KLF2,CLASP1,SMC3,STIL,CASP3,DNA2,ORC6,RAC1,TUSC3,FOXC1,GSR,BCL2L1,NIN,PALB2,CASC5,TOP1MT,RFX4,T AF1,H3F3A/H3F3B,CDCA7L,CASP2,PTPRS,SNX1,LMNB2,MAST3,CDK5RAP2,KATNB1,NFIX,ARID1A,PA2G4,KIAA0101,PKM,MRE11A,TAOK1,ROR2,PHGDH, ACTN1,RASSF1,POMT2,CALR,NRAS,RFX1,SLC9A3R1,TUBG1,MAPK9,FOXO1,BIRC5,NBN,FAM111A,LPAR1,CAMTA1,ZNF346,BRCA2,SMARCC1,CBFA2T2                                                                                                                                                                                                                                                                                                                                                                                                                                                                                                                                                                                                                                                                                                                                                                                                                                                                                                               |



## Supplemental Table 7. General IPA functions for E2F1, E2F3A and E2F3B promoter targets

| ChIP-seq | Category                   | B-H p-value | Genes                                                                                                                                                                                                                                                                                                                                                                                                                                                                                                                                                                                                                                                                                                                                                                                                                                                                                                                                                                                                                                                                                                                                                                                                                                                                                                                                                                                                                                                                                                                                                                                                                                                                                                                                                                                                                                                                                                                                                           |
|----------|----------------------------|-------------|-----------------------------------------------------------------------------------------------------------------------------------------------------------------------------------------------------------------------------------------------------------------------------------------------------------------------------------------------------------------------------------------------------------------------------------------------------------------------------------------------------------------------------------------------------------------------------------------------------------------------------------------------------------------------------------------------------------------------------------------------------------------------------------------------------------------------------------------------------------------------------------------------------------------------------------------------------------------------------------------------------------------------------------------------------------------------------------------------------------------------------------------------------------------------------------------------------------------------------------------------------------------------------------------------------------------------------------------------------------------------------------------------------------------------------------------------------------------------------------------------------------------------------------------------------------------------------------------------------------------------------------------------------------------------------------------------------------------------------------------------------------------------------------------------------------------------------------------------------------------------------------------------------------------------------------------------------------------|
| E2F1     | Endocrine System Disorders | 1.49E-05    | <p>MYH10,MYH9,EIF4A2,HAUS4,ODC1,CABIN1,POR,ZC3H12C,EGR2,ZCCHC8,WWOX,MTHFD2,SAFB,TP53,GNE,TYMS,CCNE2,HCFC1,SEMA5A,RRM2,TPM3,OGG1,GART,SUPT16H,GAPDH,ALCAM,LTN1,ECT2,RBM39,FANCA,XRCC5,FBXO10,PRDX4,ARL4C,BAG6,HN1,HNRNPA2B1,ODF2L,CDK4,CTDSPL,RNF130,SMARCA4,CDKN3,RABL6,PRR14L,TIPARP,UGT2A1,KDM6A,LAPT4A,DAB2,RAD21,PHF6,PRKDC,N4BP2L2,TUBB4B,FUCA2,CUL7,TDRKH,IGF2R,CDS2,RUBCN,TUBA1A,MSH2,ABCF2,MAZ,CDKN1A,WBP2,FOXN2,WRAP53,CDKN2A,NAV2,MAP3K11,MICALL2,SMC4,RSL1D1,STARD7,KIF16B,SMC1A,MYC,TGFBR2,LEMD3,CHMP2A,FAM83B,XPO1,MYBL2,CNOT6,BRIP1,CLASP1,NBEAL2,SMC3,POLE4,SMG6,DDX23,GM2A,TUSC3,ATAD2,PHRF1,DYNLRB1,OSBPL8,OLA1,CAND1,BCL2L1,GINS1,TAF1,GIPC1,DUSP1,mir-210,HSP90AA1,NCKAP5L,ABCD1,B2M,ARID1A,KIAA0101,ETF2I,BARD1,RNASEH2B,CLUAP1,FASTKD3,CFAP100,ETF2A1,E2F3,SEMA4C,IGF2BP1,RAD50,TRA2A,POLR1C,AKR1A1,FANCD2,VARS,RACGAP1,TUBG1,EMD,FOXM1,ALS2,BIRC5,GAN,FANCL,NBN,HNRNPM,PDAP1,PRKCI,RIOK2,COX5A,C19orf47,MSH6,BRCA2,CAMTA1,SLC19A2,WNK1,WFS1,KIF18A,CERCAM,CEP85,CEP120,DSTN,CDKN2C,ZNF436,HIST1H2AB,EEF1D,IRS2,PRIM2,SLC39A13,TAOK2,DNMT1,KMT2B,PAPOLA,PYCRL,OTUD4,FANCC,HMGA1,JUNB,RAD51D,MED12,SH3GL1,PTBP1,EML5,MYO9A,H2AFX,NCLN,E2F1,RTN4,ARHGAP35,LRP8,CDK19,CYR61,HAUS6,HIST1H1C,ADAM17,FN1,GSTM5,ALKBH7,ZNF143,NRF1,CAMK2N2,EIF4G1,CORO2B,TYW1,CHEK1,STOM,MTOR,SCAF4,RINT1,TOP2A,MCPH1,NUP205,TBCD,AIFM1,GLMN,CEP152,LETM1,MVB12A,MDM2,TSG101,F3,SIN3A,CDK1,RRM1,KITLG,RAD54B,ZNF546,ADAM10,EML6,USP49,ZFYVE19,NCAM1,LRFN4,CLUH,FZR1,ORC2,MCM8,MAPK1,FARP1,VPRBP,PYROXD1,FBXW7,TIGD3,TUBB,AURKB,STMN1,FGFR3,LPAR2,STAG1,EZH2,PGP,HTRA2,TSPAN4,BRCA1,HIST1H3F,FARP2,PDE10A,POLE2,STK11,ULK4,TBP,CCT6A,MAT2B,MAPK8IP3,SSRP1,RALBP1,TPX2,HERC2,SRSF3,TOP1MT,PALB2,PKD1,LCORL,CASP2,SBNO2,CDK2,LRRC14,TNRC6B,DDX39A,IWS1,CUTA,PKM,RAPGEF6,NUP50,MRE11A,KIAA0825,TRIM24,HSP90B1,PRIM1,PCK2,ZNF280B,LTBP4,RBM15,GOT2,STK40,YLPM1,E2F8,BICD2,S1PR2,NRAS,TRA2B,DOCK7,HIVEP2,FDPS,GNAI2,NR1H2,HIVEP1,NUP62,Sf1,CAD,RTN3,HIST1H2AM,SHMT2</p> |
| E2F1     | Infectious Diseases        | 1.70E-05    | <p>NPM1,POLA1,NUP133,MTX1,POR,MRPL10,SMARCB1,ETF1,VAMP3,ATF4,SENP5,RUVBL2,SAFB,MGAT1,FAM172A,TP53,TYMS,PGRMC2,RRM2,NUP107,TAT,TCF3,RGP1,DAXX,CNOT7,FSCN1,SUPT16H,BTG2,SUMO2,TFRC,GAPDH,NPHP3,ATP6V0E1,PRDX2,ERI3,DEK,AP2A1,BAG6,ARL4C,GAK,CDK4,PPIA,MKRN2,MED28,TECR,OGT,ARF6,MAP4,PIK3C3,PNRC1,SNRPD3,RAD21,DHX9,HNRNPU,VPS16,KHDRBS1,TUBB4B,POLG,SERPINB6,ST3GAL3,IGF2R,KPNB1,MND1,RPS16,TUBA1A,MSH2,POLA2,MSRA,CDKN2A,SDF4,SOCS3,ILF3,MAP3K11,PCDH18,AMDHD2,KXD1,RSL1D1,GLYR1,RARG,RGPD4 (includes others),TGFBR2,MYC,CD164,SAE1,RHOB,RAB11B,CHMP2A,PPP3R1,XPO1,MITD1,SNN,PPP1R15B,HUWE1,HNRNPF,NBEAL2,STXBP1,DDX23,MYEF2,GABPB2,GM2A,SAP30BP,DDOST,CEP68,CBLB,BCL2L1,PIP5K1A,H3F3A/H3F3B,DUSP1,OXSR1,EDEM1,mir-210,HSP90AA1,PKMYT1,RPSA,B2M,ALG14,NMT1,ZGPAT,RND1,ARID1A,ETF2I,ETF2A1,PTGES3,IGF2BP1,HNRNPK,SEC14L1,CCNA2,DNAJB1,LONP1,PRKCA,SLC20A1,WDT1,SDC1,SLC9A3R1,NOP56,RNF26,RACGAP1,TUBG1,G3BP1,UMPS,HNRNPM,HTATSF1,MAPK14,PRKCI,WNK1,RAB5C,AHCYL1,SOX12,RAN,mir-148,SFPQ,TM9SF2,ZNF436,HES1,CHAF1A,INTS7,CHMP2B,MED21,KARS,IRS2,TIMP2,PYCRL,TIPIN,TKT,FANCG,COPS5,HIRA,TIMM17B,HMGA1,MON2,SSR1,RAB31,UBQLN4,RPL10A,LARGE,SHCBP1,BSG,GAB1,WDR83,AHCTF1,CANT1,HIST1H1C,FYN,FN1,SRD5A1,POLR2J,NUP214,NRF1,NEIL3,YY1,MTOR,RNPS1,ADK,RAB33B,DGCR8,CREB1,TOP2A,EIF3A,SOCS2,MAP1LC3A,NUP205,RXRβ,KHSRP,PCBP2,NUDCD3,NUP85,SUZ12,DDX50,ACTB,PLCG1,GINS4,PLK1,MVB12A,MDM2,F3,POLD1,TSG101,FADD,SF3B2,mir-30,NUP153,ADAM10,RBPJ,CLUH,FAM76B,MAPK1,ARF1,VPRBP,WasI,CLTB,TUBB,LOC102724828/MRPL23,PBK,SSR3,SRSF1,WRN,LPAR2,RPS20,ASXL2,FASN,EZH2,DLST,IMPA2,MID1IP1,SNU13,BRCA1,KLF2,NUP155,CASP3,CCDC134,RPL3,SNRNP27,SNRPF,HSPA9,RAC1,PSMC4,RAB8A,RANBP1,SNW1,NDUFAF2,SSRP1,PANK1,PKD1,CASP2,EIF4A3,TMPO,UVRAG,KATNB1,CDK2,TAGLN2,SH3BP4,MRE11A,NUP50,TAOK1,GANAB,NAA10,BCAR1,HSP90B1,POLR2A,ADAL,CIT,Pvr,DHX15,ACTN1,NDUFAF3,RASSF1,BICD2,PCOLCE2,PSMA1,NFKBIZ,XIAP,C1orf174,FAU,FDPS,RPS4Y1,PTPRU,SNRNP70,NUP62,CAD,HMGCR,RTN3,EIF3L,LGALS1</p>            |

## Supplemental Table 7. General IPA functions for E2F1, E2F3A and E2F3B promoter targets

| ChIP-seq | Category                                      | B-H p-value | Genes                                                                                                                                                                                                                                                                                                                                                                                                                                                                                                                                                                                                                                                                                                                                                                                                                                                                                                        |
|----------|-----------------------------------------------|-------------|--------------------------------------------------------------------------------------------------------------------------------------------------------------------------------------------------------------------------------------------------------------------------------------------------------------------------------------------------------------------------------------------------------------------------------------------------------------------------------------------------------------------------------------------------------------------------------------------------------------------------------------------------------------------------------------------------------------------------------------------------------------------------------------------------------------------------------------------------------------------------------------------------------------|
| E2F1     | Skeletal and Muscular Disorders               | 1.86E-05    | CEP120,PCGF2,TGFBR3,mir-148,HES1,POR,SKIV2L,XRCC2,FBLN1,SNIP1,CBFB,SPECC1L,SLC39A13,CENPJ,TP53,GNE,TYMS,CSR2,CRKL,SNAI1,TPM3,MED12,CRABP1,LARGE,ARHGAP35,TMEM43,RMRP,NDST1,CANT1,SNAI2,AKAP8,mir-331,CDT1,BAG6,HEXA,HOXC9,NUAK2,TAX1BP3,SMARCA4,LBR,B4GALT7,YY1,KDM6A,RAB33B,SOS1,DAB2,STIM1,MC1H,B3GALNT2,TBCD,TCTN3,ORC1,EPG5,FMN1,CEP152,HNRNPU,GAS1,ACTB,CDC6,DLX1,MDM2,VPS26A,IGF2R,POLD1,MTHFD1L,mir-30,TMEM107,CDKN1A,ADAM10,RBPJ,SGCD,POC1A,CASP7,INSIG1,MMP16,TMCO1,RPGRI1L,RARG,LMNB1,SC5D,IFT140,FGFR3,TGFBR2,LEMD3,UFPS2,MATR3,BCA1,KLF2,CLASP1,ESCO2,SMC3,GJA1,P4HB,STIL,WDR34,SYNE2,CASP3,DNA2,ORC6,LZTR1,KMT2A,BCL2L1,NIN,PALB2,CASC5,PKD1,EIF4A3,RECQL4,mir-210,SMCHD1,PTPRS,SNX1,SF3B4,LMNB2,LFNG,CDK5RAP2,NFIX,RAB23,PIGV,POLR1C,ROR2,HSP90B1,PHGDH,LONP1,RASSF1,POMT2,CALR,TACC3,NRAS,SNRPB,EMD,CANX,MAPK9,MTHFD1,ALS2,MTAP,NBN,GNAI2,FAM111A,LPAR1,PBX3,DYM,BCA2,SMARCC1,WNT5A           |
| E2F1     | Cardiovascular Disease                        | 2.32E-05    | NPM1,GLRX5,MYH9,TGFBR3,CDKN2C,RPL35A,RICTOR,POR,FANCB,WWOX,SMARCB1,TSC2,ATF4,CBFB,MGAT1,DNMT1,TYMS,TP53,FANCG,RRM2,FANCC,TCF3,OGG1,LARGE,DAXX,CDAN1,E2F1,TFRC,ALCAM,TINF2,HELB,FH,FANCA,PRDX2,FANCM,FN1,SNAI2,TCEA1,ATF7,GSTM5,HMG1,GPX1,CDK4,SMARCA4,STOM,ARF6,RINT1,KDM6A,PIK3C3,PNRC1,ADK,TOP2A,RXR, NFE2L2,DIS3,RAD21,GLMN,SDHA,PRKDC,RPS19,TUBB4B,TRIM28,PLCG1,PLK1,MDM2,IGF2R,CDK1,RRM1,FADD,KITLG,BUB1,SENP1,CCNE1,TUBA1A,MSH2,CDKN1A,ZFP36L2,ACTL6A,BIRC2,CDKN2A,ERCC6,LHX2,MAPK1,HELQ,ZFP36L1,TUBB,RARG,TGFBR2,MYC,E2F6,AK1,PMS1,WRN,PIM1,STAG1,PPP3R1,EZH2,BCA1,BRIP1,RAD51C,KLF2,DLC1,SMC3,STIL,POLE4,POLE2,STK11,RAC1,SLC25A37,TMOD3,MUT,AURKA,BUB1B,KMT2A,GSR,CASC5,PALB2,BCL2L1,Cdc42,RECQL4,C15orf41,MAD1L1,HSP90AA1,CDK2,FOX4,SEC31A,SLC7A1,TNFAIP3,PDCD10,PRKAG1,TRIM24,SP3,FANCD2,SIPA1,TRNT1,BLM,SLC20A1,NRAS,TUBG1,NFATC4,NFKBIZ,IPP,FANCL,NBN,AFF1,MAPK14,LPAR1,MSH6,BCA2,SLC19A2,FANCI |
| E2F1     | Cell Signaling                                | 3.34E-05    | NPM1,GCHFR,AXIN1,TGFBR3,DNAJC3,HES1,PHACTR4,CHAF1A,SCO2,CD2AP,AJUBA,TSC2,VAMP3,TAOK2,TARBP2,MAP3K2,IQGAP3,TP53,HCFC1,NUP107,RFC1,FANCC,HMGA1,HSPA8,DAXX,GAB1,NCLN,AHCTF1,COX18,LRP8,PARD3,CYR61,FANCA,PRDX2,CAPZA1,GADD45B,Calm1 (includes others),FBXO7,WWTR1,BOK,MTCH1,PITRM1,SF3B3,DIABLO,TRIB1,TRIM27,CHAF1B,CEBPA,DAB2,NUP205,HJURP,HEXIM1,AIFM1,KPNA3,FMN1,AZIN1,PLK1,MDM2,F3,CDK1,SENP1,NUP153,CDKN1A,MAP3K3,NCAM1,CDKN2A,FOXRED1,MAP3K11,ERCC6,MAPK1,ARF1,Wasl,SLF2,MMP16,NR2F2,GNB2L1,FNIP2,UBA2,MYC,SAE1,LPAR2,PDCD6,TSPAN4,DLC1,CASP3,CYB5B,MAPK8IP3,KMT2A,EPRS,PIP5K1A,ERP29,NAGLU,INPP5K,PIDD1,ITB,GADD45G,COX10,TNFAIP3,TAF7,IQGAP1,PRKAG1,CDC25B,SHC1,GMNN,STX4,GMFB,PRKCA,NDUFAF3,NDUFAF4,DAP,S1PR2,CAPZB,GTFC3,SLC9A3R1,AVPI1,MAPK9,ALS2,GNAI2,FAF1,CACUL1,LPAR1,RPS27L,CASP8AP2,WNT5A                                                                                                      |
| E2F1     | Hematological System Development and Function | 3.94E-05    | CDKN2A,FZR1,NPM1,SOCS3,LHX2,Wasl,DIAPH3,ZFP36L1,FBXW7,KXD1,TGFBR2,MYC,STK4,TNRC6C,PIM1,CBFB,MYBL2,KLF2,APEX2,PPP1R15B,TIMP2,TP53,NBEAL2,RBL2,STK11,BIRC6,RAC1,TMOD3,FANCC,KLF13,KMT2A,BCL2L1,E2F1,TFRC,LFNG,Gm15807/Hmgn5,TMPO,CDK2,PRDX2,ZFAT,PIM3,RAB27B,CDK4,SLC7A1,SMARCA4,PRKAG1,ID1,NFYA,SIPA1,PRKCE,RBM15,BLM,NFE2L2,SLC20A1,RPS19,NRAS,DCK,PLCG1,MDM2,STK3,IGF2R,BIRC5,ARID3A,KITLG,SENP1,MAPK14,MSH2,FEN1,SLC19A2,ZFP36L2                                                                                                                                                                                                                                                                                                                                                                                                                                                                           |

## Supplemental Table 7. General IPA functions for E2F1, E2F3A and E2F3B promoter targets

| ChIP-seq | Category                                     | B-H p-value | Genes                                                                                                                                                                                                                                                                                                                                                                                                                                                                                                                                                                                                                                                                                                                                                                                                                                                                                                                                                                                                                                                                                                                                                                                                                                                                                                                                                                   |
|----------|----------------------------------------------|-------------|-------------------------------------------------------------------------------------------------------------------------------------------------------------------------------------------------------------------------------------------------------------------------------------------------------------------------------------------------------------------------------------------------------------------------------------------------------------------------------------------------------------------------------------------------------------------------------------------------------------------------------------------------------------------------------------------------------------------------------------------------------------------------------------------------------------------------------------------------------------------------------------------------------------------------------------------------------------------------------------------------------------------------------------------------------------------------------------------------------------------------------------------------------------------------------------------------------------------------------------------------------------------------------------------------------------------------------------------------------------------------|
| E2F1     | Respiratory Disease                          | 4.28E-05    | NPM1,MAGED1,MYH9,PCBP1,NUP133,EIF4A2,STK35,ODC1,POR,AJUBA,CERS5,TSC2,WWOX,COPS6,TARBP2,TP53,TYMS,SERBP1,RRM2,OGG1,GART,SKP2,MB21D2,ALCAM,ECT2,PRDX2,GADD45B,PRDX4,GNA11,ODF2L,CDK4,PPIA,MED28,ARF6,MAP4,PRR14L,KDM6A,NFE2L2,ATN1,RAD21,DHX9,PHF6,GAS1,TUBB4B,GNA12,TPK1,SLC29A1,BUB1,CLK4,TUBA1A,MSH2,AIMP2,CDKN1A,EIF4A1,CDKN2A,PRELID3B,GNB2L1,RARG,SMC1A,RGPD4 (includes others),MYC,TGFBR2,CTSD,FDFT1,RCC1,MLEC,PDCD6,HUWE1,SMC3,POLE4,SYNE2,MYEF2,TMTC4,DNA2,HELLS,AURKA,BUB1B,CDC42,KIAA0907,BCL2L1,TFAM,TAF1,mir-210,MAD1L1,HSP90AA1,B2M,QRICH1,ARID1A,CCNA2,FANCD2,RALY,TUBG1,G3BP1,FOXM1,BIRC5,FANCL,NBN,MAPK14,PRKCI,SLC33A1,PHF19,KLF5,MSH6,CKS1B,BRCA2,WNK1,CCP110,CDKN2C,HES1,RBL1,RPS11,XRCC1,EZR,OSMR,CBFB,PRIM2,DNMT1,KMT2B,PABPC1,DNAJB2,NDRG1,COPS5,YWHAZ,AP5Z1,RFC4,E2F1,ARHGAP35,CYR61,YEATS4,HIST1H1C,ADAM17,FN1,BTG3,DUSP6,GPX1,ID1,MTOR,HK2,SCAF4,RINT1,DGCR8,TP53,CEBPA,EIF3A,PRKCE,MAP1LC3A,TBCD,RXR,LETM1,DCK,CDC6,TIAL1,MDM2,PLK1,F3,SCAF11,C1orf159,TSG101,CDK1,SIN3A,RRM1,FADD,mir-30,MCM2,CTNBL1,DNPH1,ZFP36L2,MBD5,TAF15,NCAM1,FZR1,SND1,PRPF19,ERCC6,MMP16,FBXW7,TUBB,AURKB,STMN1,FGFR3,DPY19L4,SRSF1,STAG1,ASXL2,EZH2,FASN,HEXDC,BRCA1,P4HB,RBL2,CASP3,POLE2,STK11,RAC1,TBP,ATP10A,TPX2,HERC2,TP53,ARRB2,AK2,TNRC6B,IWS1,PKM,MRE11A,TAOK1,ANAPC1,HSP90B1,POLR2A,CDCA5,NACA,RASSF1,NRAS,PPP4R3A,MTAP,XIAP,FDPS,PTPRU,SHMT2,WNT5A,LGALS1 |
| E2F1     | Hematopoiesis                                | 5.49E-05    | CDKN2A,FZR1,SOCS3,NPM1,LHX2,DIAPH3,ZFP36L1,FBXW7,TGFBR2,MYC,STK4,TNRC6C,PIM1,MYBL2,CBFB,KLF2,APEX2,PPP1R15B,TP53,RBL2,BIRC6,RAC1,TMOD3,FANCC,KLF13,KMT2A,BCL2L1,TFRC,LFNG,Gm15807/Hmgn5,TMPO,CDK2,PRDX2,ZFAT,PIM3,CDK4,SLC7A1,PRKAG1,ID1,NFYA,SIPA1,PRKCE,NFE2L2,SLC20A1,RPS19,NRAS,DCK,PLCG1,MDM2,STK3,IGF2R,BIRC5,ARID3A,KITLG,SENP1,MAPK14,MSH2,FEN1,SLC19A2,ZFP36L2                                                                                                                                                                                                                                                                                                                                                                                                                                                                                                                                                                                                                                                                                                                                                                                                                                                                                                                                                                                                 |
| E2F1     | RNA Damage and Repair                        | 1.07E-04    | UPF2,SMG6,NCBP1,SMG5,HNRNPD,MAGOH,CNOT8,GSPT1,SMG9,RNPS1,EIF4A3,SMG7,TOE1                                                                                                                                                                                                                                                                                                                                                                                                                                                                                                                                                                                                                                                                                                                                                                                                                                                                                                                                                                                                                                                                                                                                                                                                                                                                                               |
| E2F1     | Reproductive System Development and Function | 1.20E-04    | MCM8,UBR2,Ubb,GPR3,CDC25B,Ewsr1,Ppp1cc,FANCD2,MCPH1,STIM1,CHTF18,BRCA1,RAD51C,EXO1,TP53,TRIP13,CCNE2,TDRKH,AURKA,BUB1B,FANCL,BUB1,PALB2,BRCA2,MSH5,LFNG,KIF18A,CDK2,FANCA,AKAP1                                                                                                                                                                                                                                                                                                                                                                                                                                                                                                                                                                                                                                                                                                                                                                                                                                                                                                                                                                                                                                                                                                                                                                                         |
| E2F1     | Protein Degradation                          | 3.08E-04    | RNF8,MYH9,AXIN1,UBR2,ODC1,PCOLCE,TIMP2,TP53,RGS19,HCFC1,ESPL1,JUNB,TCF3,SKP2,UBE2G2,HSPA8,RNF168,FBXL6,GAPDH,ZSWIM7,SPPL2A,FYRN,ADAM17,FBXO7,BAG6,PITRM1,SF3B3,OGT,MTOR,TIPARP,RBMX,TP53INP2,CREB1,SOCS2,STX12,BANP,AZIN1,PLK1,MDM2,TSG101,TRIM37,FADD,SENP1,ADAM10,CASP7,CDKN2A,FZR1,SOCS3,PFN1,MMP16,DIAPH3,BAG3,FBXW7,STK4,CTSD,FBXW2,TOMM7,UFPS2,XPO1,SH2B3,HTRA2,NAA16,STXB1,CDC37,GJA1,CASP3,PSMC4,AURKA,SNX3,SEL1L,CBLB,BCL2L1,Cdc42,GIPC1,EDEM1,UBE2G1,CASP2,SNX1,NAGLU,FAM83D,CREBL2,UBXN1,RAB23,UBE2N,COX10,TNFAIP3,STXB4,PDCD10,HSP90B1,UHRF2,IPO9,TRIM24,NLK,ZBED3,SP1,STUB1,OAZ1,LTBP4,LONP1,RASSF1,NACA,CALR,SDC1,HERPUD1,CANX,SENP2,STK3,PSME3,UBE3A,FAF1,NR1H2,QRSL1,WFS1,WNT5A                                                                                                                                                                                                                                                                                                                                                                                                                                                                                                                                                                                                                                                                         |
| E2F1     | Cell-To-Cell Signaling and Interaction       | 5.70E-04    | TP53,CDKN2A,POLA1,GNA12,BIRC5,XRCC1,MYC,CTSD,BCL2L1,MTOR,MSH2,mir-210,CDKN1A,TP53,GAPDH                                                                                                                                                                                                                                                                                                                                                                                                                                                                                                                                                                                                                                                                                                                                                                                                                                                                                                                                                                                                                                                                                                                                                                                                                                                                                 |
| E2F1     | Inflammatory Response                        | 5.70E-04    | TP53,CDKN2A,POLA1,GNA12,BIRC5,XRCC1,MYC,CTSD,BCL2L1,MTOR,MSH2,mir-210,CDKN1A,TP53,GAPDH                                                                                                                                                                                                                                                                                                                                                                                                                                                                                                                                                                                                                                                                                                                                                                                                                                                                                                                                                                                                                                                                                                                                                                                                                                                                                 |
| E2F1     | Dermatological Diseases and Conditions       | 8.27E-04    | TGFBR2,TP53,WRN,NRAS,CDKN1A,MAPK9,PRKCE,ODC1                                                                                                                                                                                                                                                                                                                                                                                                                                                                                                                                                                                                                                                                                                                                                                                                                                                                                                                                                                                                                                                                                                                                                                                                                                                                                                                            |

## Supplemental Table 7. General IPA functions for E2F1, E2F3A and E2F3B promoter targets

| ChIP-seq | Category                                       | B-H p-value | Genes                                                                                                                                                                                                                                                                                                                                                                                                                                                                                                                                                                                                                                                                                                                                                                                                                            |
|----------|------------------------------------------------|-------------|----------------------------------------------------------------------------------------------------------------------------------------------------------------------------------------------------------------------------------------------------------------------------------------------------------------------------------------------------------------------------------------------------------------------------------------------------------------------------------------------------------------------------------------------------------------------------------------------------------------------------------------------------------------------------------------------------------------------------------------------------------------------------------------------------------------------------------|
| E2F1     | Cardiovascular System Development and Function | 8.45E-04    | MYH10,PCGF2,TGFBR3,UBR2,CDKN2C,RICTOR,CABIN1,POR,CD2AP,Tmsb4x (includes others),FBLN1,CBFB,HEY2,MGAT1,TP53,ETS1,CCNE2,CSRP2,SNX13,SEMA5A,CRKL,HIRA,HMGA1,ATE1,GAB1,CCNF,TFRC,HIST1H1D,MAPK7,PARD3,PRDX2,HIST1H1C,ADAM17,PIM3,FN1,CTNNA3,CDK4,SRSF10,ID1,CC2D1A,CREB1,VCL,HEXIM1,RXRB,NFE2L2,DLX1,IGF2R,F3,ARID3A,FADD,RAD54B,CCNE1,CDKN1A,ADAM10,RBPJ,GPR180,SGCD,TFB1M,CASP7,BIRC2,MAPK1,LHX2,WasI,ZFP36L1,NR2F2,FBXW7,RPGRIP1L,RARG,MYC,TGFBR2,STK4,PIM1,PPP3R1,SIAH2,HTRA2,DLC1,KLF2,TAB1,PPP1R15B,NBEAL2,GJA1,RBL2,CASP3,STK11,BIRC6,RAC1,RAD54L,MAPK8IP3,PALB2,BCL2L1,Cdc42,PKD1,COMMD1,LFNG,FZD5,ACTN4,CDK2,FOXP4,DCBLD2,NUMB,SLC7A1,PDCD10,BCAR1,ZMIZ1,PRKAG1,SHC1,HSP90B1,NLK,RAD17,MAML3,DPH3,ARSB,BLM,E2F8,PRKCA,CALR,PAK4,CAPZB,NRAS,S1PR2,EMD,MAPK9,TCF7L1,NFATC4,STK3,FOXO1,XIAP,NR1H2,MAPK14,EHD4,KLF5,E2F7,EFEMP2 |

**Supplemental Table 7. General IPA functions for E2F1, E2F3A and E2F3B promoter targets**

| ChIP-seq | Category               | B-H p-value | Genes                                                                                                                                                                                                                                                                                                                                                                                                                                                                                                                                                                                                                                                                                                                                                                                                                                                                                                                                                                                                                                                                                                                                                                                                                                                                                                                                                                                                                                                                                                                                                                                                                                                                                                                                                                                                                                                                                                                                                                                                                                                                                                                                                                                                                                                                                                                                                                                                                                                                                                                                                                                                                                                                                                                                                                                                                                                                                                                                                                                                                                                                                                                                                                                                                                                                                                                                                                                                                                                                                                                                                                                                                                                                                                                                                                                                                                                                                                                                                                                                                                                                                                                                                                                                                                                                                                                                                                                                                                                                                                                                                                                                                                                                                                                                                                                                                   |
|----------|------------------------|-------------|-------------------------------------------------------------------------------------------------------------------------------------------------------------------------------------------------------------------------------------------------------------------------------------------------------------------------------------------------------------------------------------------------------------------------------------------------------------------------------------------------------------------------------------------------------------------------------------------------------------------------------------------------------------------------------------------------------------------------------------------------------------------------------------------------------------------------------------------------------------------------------------------------------------------------------------------------------------------------------------------------------------------------------------------------------------------------------------------------------------------------------------------------------------------------------------------------------------------------------------------------------------------------------------------------------------------------------------------------------------------------------------------------------------------------------------------------------------------------------------------------------------------------------------------------------------------------------------------------------------------------------------------------------------------------------------------------------------------------------------------------------------------------------------------------------------------------------------------------------------------------------------------------------------------------------------------------------------------------------------------------------------------------------------------------------------------------------------------------------------------------------------------------------------------------------------------------------------------------------------------------------------------------------------------------------------------------------------------------------------------------------------------------------------------------------------------------------------------------------------------------------------------------------------------------------------------------------------------------------------------------------------------------------------------------------------------------------------------------------------------------------------------------------------------------------------------------------------------------------------------------------------------------------------------------------------------------------------------------------------------------------------------------------------------------------------------------------------------------------------------------------------------------------------------------------------------------------------------------------------------------------------------------------------------------------------------------------------------------------------------------------------------------------------------------------------------------------------------------------------------------------------------------------------------------------------------------------------------------------------------------------------------------------------------------------------------------------------------------------------------------------------------------------------------------------------------------------------------------------------------------------------------------------------------------------------------------------------------------------------------------------------------------------------------------------------------------------------------------------------------------------------------------------------------------------------------------------------------------------------------------------------------------------------------------------------------------------------------------------------------------------------------------------------------------------------------------------------------------------------------------------------------------------------------------------------------------------------------------------------------------------------------------------------------------------------------------------------------------------------------------------------------------------------------------------------------------|
| E2F1     | Hepatic System Disease | 9.76E-04    | NPM1,AXIN1,POLA1,FRMD6,POR,GLB1,ZCCHC8,SMARCB1,TSC2,MAP1A,SAFB,HCFC1,TCF3,ZBTB5,RGP1,OGG1,SP4,DAXX,CNTRL,HIST1H2BM,MB21D2,EYA3,ALCAM,ELMO2,ECT2,CCDC138,NDST1,SLC1A5,mir-331,BAG6,GAK,SMARCA4,FXR2,TIPARP,UGT2A1,KDM6A,PNRC1,RBMX,PIK3C3,VPS13B,C2CD5,ATN1,SDHA,MTSS1L,ZKSCAN5,VPS16,TUBB4B,DHX36,NCBP1,SPSB4,IGF2R,KPNB1,MCM3,BUB1,MTHFD1L,RPL37,TOE1,TFB1M,AP1G1,KANSL2,KIF23,CDKN2A,RAB14,SOCS3,NAV2,MPRIIP,YWHAH,PCDH18,TR OAP,NUP58,RPGRIP1L,ZC3H14,CTSD,UFGSP2,MPHOSPH9,SETD8,COL19A1,STXBP1,POLE4,SMG6,WEE1,ASNA1,DNA2,AURKA,PHRF1,OSBPL8,KIAA0907,BCL2L1,H3F3A/H3F3B,KIAA0895L,ANKRA2,POLL,mir-210,NAGLU,SF3B4,MAST3,ABCD1,HPS5,STK33,KLF10,RAB23,CLUAP1,DDX27,IQGAP1,TEX10,LSM2,TBC1D1,STPG2,WDTA1,FRA10AC1,NDUFB1,TECPR2,IPO4,HERPUD1,STK3,ALS2,UMPS,BIRC5,MTO1,PPM1G,HTATSF1,CENPI,CKS1B,BRCA2,CAMTA1,ING1,ZDHHC6,RPLP0,MCM6,CCP110,MTBP,CEP120,UBR2,TAPT1,RAN,mir-148,MDH1,WBSCR17,GKAP1,HOOK3,PRIM2,SPECC1L,SLC39A13,PABPC1,UBXN6,CNOT1,DNAJB12,HIRA,TIMM17B,MON1A,MBD2,MON2,JUNB,AP5Z1,ME D12,MEX3A,RNF168,SUCO,AAAS,GAMT,EML5,MYO9A,NCLN,RTN4,DNAJC14,ARHGAP35,TMEM50B,NEK2,CANT1,IPO8,SNAI2,CEP78,NCAPD3,SLC4A1AP,GPX1,TRIO,NRF1,AAMP,PITRM1,KANSL3,CORO2B,TYW1,ATAD5,AKAP11,ZBTB3,NEIL3,HK2,RINT1,TICRR,CETN3,CREB1,CC2D1A,RAB33B,RFC2,TXNL1,NUP205,TCTN3,VCL,ZNF25,RGMB,NAP1L4,MCMBP,CEP164,NUP85,CEP152,PDE4DIP,BANP,TRIM28,C2orf44,TIAL1,PLCG1,PLK1,MDM2,CNKSR3,F3,SCAF11,C1orf159,RHOBTB1,NCAPG2,ZNF519,RRM1,GLTP,ZNF546,ATL2,MMS19,DUS3L,CEP192,EML6,WDR25,RBBP6,ZFYVE19,NCAM1,FMNL3,PFN1,FARP1,ARF1,CNNM2,UNC5B,FBXW7,RELL1,FAM208A,KHNYN,TMEM230,FASN,HEXDC,RPRD2,HIST1H3F,C7orf50,P4HB,GJA1,STIL,DCTN4,TRIOBP,POLE2,USP38,MTA2,BIRC6,ATP10A,MUT,MAPK8IP3,HERC2,NIN,NASP,WHSC1L1,BRAT1,HNRNPUL2,C15orf41,TSNAXIP1,SBNO2,KBTD8,UVRAG,CDK2,FADS1,KDM3A,BRD2,PA2G4,MRPS30,MRE11A,KIAA0825,ZMIZ1,TRIM24,GTf2B,PHGDH,IFRD1,IPO5,YLPM1,RASSF1,NRAS,TRA2B,COTL1,PANK2,DOCK7,TCF7L1,C19orf68,ZNF382,PIAS3,FAF1,RPS4Y1,TMEM2,PTPRU,U2SURP,HIVEP1,ZDHHC12,MTRF1L,CBFA2T2,CASP8AP2,C17orf80,MYH10,PRR12,DSN1,PCIF1,FAM208B,CABIN1,ADH5,PAN2,SNRNP48,RCL1,MGAT1,RNGTT,IQGAP3,TP53,ATP5J,TYMS,GNE,ASF1B,ESPL1,PAPD4,APPL2,BLVRA,RRM2,ANO6,SMG5,MDM1,MYO1C,KLF13,TBC1D14,SKP2,HSPA8,FBXW8,ATE1,MORC2,PPOX,TMEM55A,ST3GAL1,MIDN,GTSE1,ANAPC5,PCYOX1L,LTN1,PARD3,WDR70,NUP188,FKBP2,FBXO10,HNRNPA2B1,ODF2L,CDK4,THOC3,MKRN2,DNAJC13,PRPF4,KIAA0754,RNF130,GAS2L3,LRRFIP1,SLC35B2,THUMP2,MMS22L,LBR,CDKN3,TME M209,OGT,TMEM260,TRIM27,FAM227A,ALG8,BTAF1,ZBTB45,NFE2L2,DIS3,RAD21,CCDC57,PRKDC,N4BP2L2,GNA12,MAPRE1,CDH6,POLG,MLF1,LARP4B,NCAPD2,SLC29A1,RUBCN,CCNE1,DDX39B,ABCF2,RIK8B,EIF4A1,CDKN1A,MBD3,DOPEY2,ZCWPW1,VMP1,SPICE1,CEP112,PPIL1,MAOA,WRAP53,FOXRE D1,ILF3,MAP3K11,MEGF9,MSH3,GNB2L1,TSFM,AP2A2,KIF16B,NSUN6,MYC,TGFB2,LEMD3,TNRC6C,AHDC1,PHF20,PACS2,FAM83B,CACTIN,CHTF18,E4F1,PPP1R15B,CLASP1,EIF4B,PGK1,TXNDC16,HUWE1,NBEAL2,USP28,TEX264,SYNE2,MYEF2,KANK2,KIF4A,CLIP2,ORC6,ENK1,BUB1B,BRD8,TUSC3,ATAD2,KMT2A,CBLB,HNRNPAB,PIAS4,TAF1,UGP2,MLXIP,XRCC6,SEPT10,SMCHD1,MAD1L1,LMNB2,HSP90AA1,NCKAP5L,FAM83D,PTPN21,RBBP4,B2M,DCB LD2,UBXN1,NMT1,ARID1A,QRIC1,SEC31A,TBC1D8B,UBE2N,FASTKD3,NEURL4,C14orf80,HNRNPK,RAD50,IGF2BP1,MIER1,CDC25B,CCNA2,SHC1,SP3,F ANCD2,WDFY3,NET1,DNAJC4,NOP58,CABLES2,ENPP4,MEX3B,MCM9,VAR5,LONP1,ARC,POMT2,RFX1,HAUS8,NOP56,AP1S2,XRN2,RALY,CHERP,NMT2,FOX M1,MTHFD1,NFKBIL1,GAN,ATL3,PSME3,NBN,HNRNPM,FAM98B,PSKH1,MAPK14,WDR54,RIOK2,KIF5B,PHF19,ZNF622,EHD4,SMG7,THAP4,MSH6,WN K1,GZF1,FANCI,CENPF,MZF1,GTf3C2,ARV1,GOLIM4,SFPQ,ZNF451,RICTOR,RUSC1,NCOA7,INTS7,MXD3,TTf2,THRAP3,HNRNPUL1,IRS2,OSMR,CEP250,PITPNB,TIMP2,PAPOLA,UPF2,NDRG1,MEX3C,TMEM55B,TOPBP1,COPS5,NUFIP1,SERINC1,FANCC,UBE2S,WDR89,FNBP4,CTPS1,UBQLN4,PLA2G6,NSM CE2,NR1D1,BSG,ZNF202,YARS,E2F1,FBXL6,AHCTF1,RGL2,LRP8,HELB,CYR61,L3MBTL2,CD2BP2,VASH2,ADAM17,FN1,SUV39H2,ALKBH7,CTNNA3,NUP21 4,RTKN2,TRIB1,YY1,MTOR,POLR2M,PTS,DGCR8,TOP2A,DAP3,EIF3A,E2F5,MCPH1,CFAP77,KIAA0391,PCBP2,SARS,KHSRP,RXR,RBP1,FAM109A,NUP35 ,AIFM1,SAMD14,FMN1,LETM1,DCK,CCDC130,ACTB,CENPU,ICAM4,RQCD1,ATXN2L,PCDH9,SIN3A,RAD54B,KIF15,SF3B2,mir-30,RBM6,KIF20B,DENND1A,CENPA,RBPJ,ZFP36L2,USP49,MBD5,BIRC2,ZMYM4,FZD7,FZR1,SND1,ERCC6,TFG,INSIG1,DIAPH3,MMP16,NR2F2,CDH24, FNIP2,AURKB,UBA2,CCNL1,FGFR3,ROCK2,NCOA5,SRSF1,CPSF6,DPY19L4,SPATA5,POLD3,PMS1,EZH2,PRND,HTRA2,NIPBL,PUF60,BRCA1,RAD51C,ARHGAP 24,MRPL43,FARP2,KIF14,RBL2,PDE10A,STK11,ZC3H6,TBP,CCT6A,MARS,TPX2,EPRS,DPP9,GSR,SEL1L,CASC5,ARRB2,TOB2,ZFR,CASP2,PTPRS,GNL3,L TV1,BAZ1B,AK2,PFAS,RFC3,OBFC1,ZBTB7A,TNRC6B,MED23,NFIX,CHD4,GTf3C5,PKM,CUTA,SLC7A1,RAPGEF6,POLI,SIL1,DARS2,STXBP4,GANAB,BCAR 1,CENPP,LCA5,NKD2,NFX1,NLK,PCK2,SP1,ADAL,CIT,OXCT1,LTBP4,ZNHIT2,ARSB,BLM,STK40,ACTN1,E2F8,IDH3B,TM9SF1,NACA,BICD2,DCTPP1,MDGA1 ,MAPK9,FCHSD2,RPS6KA5,USP1,PSMA1,GCC2,HIVEP2,AFF1,ZBTB48,KIF24,PPP6R1,LPAR1,PAQR4,CAD,HMGCR,RTN3,MCM7 |
| E2F1     | Organ Morphology       | 9.94E-04    | CDKN2A,MYH10,MCM8,MAPK1,UBR2,TGFB3,POR,Tmsb4x (includes others),SAFB,HEY2,TAB1,RBL2,CCNE2,CSR2,HMGA1,FANCC,ATE1,BCL2L1,E2F1,MAPK7,CDK2,ADAM17,FN1,GTf2I,PRDX4,CTNNA3,CDK4,RAPGEF6,PD CD10,E2F3,BCAR1,SRSF10,SHC1,HSP90B1,MCPH1,HEXIM1,VCL,PRKCA,CALR,PAK4,CAPZB,EMD,TDRKH,NFATC4,FOX M1,IGF2R,ARID3A,FADD,NR1H2,C DKN1A,RBPJ,KIF18A                                                                                                                                                                                                                                                                                                                                                                                                                                                                                                                                                                                                                                                                                                                                                                                                                                                                                                                                                                                                                                                                                                                                                                                                                                                                                                                                                                                                                                                                                                                                                                                                                                                                                                                                                                                                                                                                                                                                                                                                                                                                                                                                                                                                                                                                                                                                                                                                                                                                                                                                                                                                                                                                                                                                                                                                                                                                                                                                                                                                                                                                                                                                                                                                                                                                                                                                                                                                                                                                                                                                                                                                                                                                                                                                                                                                                                                                                                                                                                                                                                                                                                                                                                                                                                                                                                                                                                                                                                                                                     |

## Supplemental Table 7. General IPA functions for E2F1, E2F3A and E2F3B promoter targets

| ChIP-seq | Category                                              | B-H p-value | Genes                                                                                                                                                                                                                                                                                                                                                                                                                                                                                                                                                                                                                                                                                                                                                                                                                                                                                                                                                                                                                                                                                                                                                                                                                                                                                                                                               |
|----------|-------------------------------------------------------|-------------|-----------------------------------------------------------------------------------------------------------------------------------------------------------------------------------------------------------------------------------------------------------------------------------------------------------------------------------------------------------------------------------------------------------------------------------------------------------------------------------------------------------------------------------------------------------------------------------------------------------------------------------------------------------------------------------------------------------------------------------------------------------------------------------------------------------------------------------------------------------------------------------------------------------------------------------------------------------------------------------------------------------------------------------------------------------------------------------------------------------------------------------------------------------------------------------------------------------------------------------------------------------------------------------------------------------------------------------------------------|
| E2F1     | Skeletal and Muscular System Development and Function | 9.94E-04    | MYH10,ADAM17,FN1,MAPK1,TGFBR3,UBR2,CTNNA3,CDK4,PDCD10,BCAR1,SRSF10,POR,SHC1,HSP90B1,Tmsb4x (includes others),VCL,HEY2,HEXIM1,TAB1,PRKCA,CALR,RBL2,PAK4,CAPZB,CSR2,EMD,NFATC4,HMGA1,FOXO1,IGF2R,ARID3A,FADD,ATE1,BCL2L1,CDKN1A,RBPJ,MAPK7,CDK2                                                                                                                                                                                                                                                                                                                                                                                                                                                                                                                                                                                                                                                                                                                                                                                                                                                                                                                                                                                                                                                                                                       |
| E2F1     | Nucleic Acid Metabolism                               | 1.01E-03    | TYMS,DUT,ADK,RRM2,SHMT1,DTYMK,RRM1                                                                                                                                                                                                                                                                                                                                                                                                                                                                                                                                                                                                                                                                                                                                                                                                                                                                                                                                                                                                                                                                                                                                                                                                                                                                                                                  |
| E2F1     | Small Molecule Biochemistry                           | 1.01E-03    | TYMS,DUT,ADK,RRM2,SHMT1,DTYMK,RRM1                                                                                                                                                                                                                                                                                                                                                                                                                                                                                                                                                                                                                                                                                                                                                                                                                                                                                                                                                                                                                                                                                                                                                                                                                                                                                                                  |
| E2F1     | Protein Trafficking                                   | 2.00E-03    | CDKN2A,CALR,EGR2,PKD1,AHCYL1,HSPA9,RAN,XPO1,NUP214,NXT1,NUTF2,XPO6                                                                                                                                                                                                                                                                                                                                                                                                                                                                                                                                                                                                                                                                                                                                                                                                                                                                                                                                                                                                                                                                                                                                                                                                                                                                                  |
| E2F1     | Hair and Skin Development and Function                | 2.00E-03    | CDKN2A,FYN,FN1,SUV39H2,FBXW7,RBL1,AURKB,SMARCA4,TOM1L1,ROCK2,MYC,STK4,ID1,SOS1,ARHGAP19,TRIM16,CDC25A,TP53,PAK4,RBL2,CASP3,MAPK9,PLK1,JUNB,FOXO1,TSG101,CDK1,CCNE1,PIP5K1A,CCNG2,MAPK14,GAB1,KLF5,CDKN1A,E2F1,RBPJ,CDK2                                                                                                                                                                                                                                                                                                                                                                                                                                                                                                                                                                                                                                                                                                                                                                                                                                                                                                                                                                                                                                                                                                                             |
| E2F1     | Hepatic System Development and Function               | 2.00E-03    | TP53,CDKN1A,E2F1,E2F7,E2F8                                                                                                                                                                                                                                                                                                                                                                                                                                                                                                                                                                                                                                                                                                                                                                                                                                                                                                                                                                                                                                                                                                                                                                                                                                                                                                                          |
| E2F1     | Organ Development                                     | 2.03E-03    | CDKN2A,FYN,FN1,SUV39H2,FBXW7,RBL1,AURKB,SMARCA4,TOM1L1,MYC,ROCK2,ID1,STK4,SOS1,ARHGAP19,TRIM16,TP53,PAK4,RBL2,CASP3,MAPK9,PLK1,JUNB,FOXO1,TSG101,CDK1,CCNE1,PIP5K1A,MAPK14,GAB1,KLF5,CDKN1A,RBPJ,CDK2                                                                                                                                                                                                                                                                                                                                                                                                                                                                                                                                                                                                                                                                                                                                                                                                                                                                                                                                                                                                                                                                                                                                               |
| E2F3A    | DNA Replication, Recombination, and Repair            | 1.42E-21    | SNTB2,RAF1,RMI1,TIMM13,POLA1,AP1AR,KRAS,STAG3,TP53,TYMS,HCFC1,PCGF6,RRM2,SKP2,HSPA8,ATE1,CCNF,SUPT16H,PDS5A,FANCA,DEK,CDK4,MTCH1,NUF2,MMS22L,SPAG5,KIF2C,RAD21,DHX9,HNRNPU,MECP2,POLG,ING5,ID3,SLC29A1,MCM3,CCNE1,MSH2,NUDT16,CDKN1A,MAZ,FBXO5,POLA2,RAD51AP1,DLGAP5,RFWD3,SMC1A,ZW10,MYC,INTS3,Gm21596/Hmgb1,PIM1,XPO1,MYBL2,BRIP1,ESCO2,SMC3,USP28,WEE1,ORC6,RAD54L,CDCA2,TFA M,DUSP1,RECQL4,XRCC6,HIRIP3,PIDD1,RMI2,ARID1A,KIAA0101,BARD1,RNASEH2B,ZNF219,E2F3,RAD51,DNAJB1,MCM9,C10orf88,LRWD1,TRIP13,TACC3,TUBG1,SMARCD1,BIRC5,PPP2R2,PPM1G,RPA2,NBN,FAM111A,MAPK14,VAV3,MSH6,BRCA2,MCM6,CCP110,MTBP,CDC7,RAN,mir-148,GFER,SFPQ,RBL1,CHAF1A,ACIN1,INTS7,RARA,TARDBP,IRS2,DNMT1,PABPC1,TIPIN,TOPBP1,MDC1,RPA1,TFAP4,CCNO,PTBP1,PCNA,RNF168,SSBP1,NSMCE2,GAB1,H2AFX,E2F1,MBD4,MSH5,CLSPN,MAPK7,SGOL1,CTC1,MGME1,CDT1,HMGB2,CHEK1,NEIL3,RIF1,DGCR8,TOP2A,RFC2,MCM10,CEP152,DUT,mir-199,DCK,CDC6,SPC25,SMC6,NAP1L1,NCAPG2,CDK1,RRM1,FADD,RAD54B,SEN1,SPDYA,MCM2,REV1,MUTYH,MMS19,FEN1,HINFP,POLH,MCM8,PFN1,PRPF19,MELK,PBK,POLD3,STAG1,EZH2,INIP,SNU13,RAD51C,BRCA1,CDC25A,APITD1/APITD1-CORT,DNASE2,NUBP1,SSRP1,Cdc42,CCNG2,ARRB2,TIMELESS,SMC2,CASP2,BAZ1B,TMPO,Paxip1,CDK2,RFC3,PRIMPOL,WDHD1,MCM4,Ppp1cc,GMNN,PMF1/PMF1-BGLAP,CDCA5,IPO5,RASSF1,DTL,MAP2K7,MTRR,SNRPB,UHRF1,HAT1,let-7,ERBB3,USP1,ITPA,DSCC1,RPS27L,MIS12,TONSL,SMARCC1,LGALS1 |

## Supplemental Table 7. General IPA functions for E2F1, E2F3A and E2F3B promoter targets

| ChIP-seq | Category                              | B-H p-value | Genes                                                                                                                                                                                                                                                                                                                                                                                                                                                                                                                                                                                                                                                                                                                                                                                                                                                                                                                                                                                                                                                                                                                                                                                                                                                                                                                                                                                                                                                                                                                                                                |
|----------|---------------------------------------|-------------|----------------------------------------------------------------------------------------------------------------------------------------------------------------------------------------------------------------------------------------------------------------------------------------------------------------------------------------------------------------------------------------------------------------------------------------------------------------------------------------------------------------------------------------------------------------------------------------------------------------------------------------------------------------------------------------------------------------------------------------------------------------------------------------------------------------------------------------------------------------------------------------------------------------------------------------------------------------------------------------------------------------------------------------------------------------------------------------------------------------------------------------------------------------------------------------------------------------------------------------------------------------------------------------------------------------------------------------------------------------------------------------------------------------------------------------------------------------------------------------------------------------------------------------------------------------------|
| E2F3A    | Cell Cycle                            | 5.46E-19    | RAF1,RMI1,TIMM13,MYH9,PRKAB2,POLA1,HAUS4,KRAS,C6orf89,FHL2,STAG3,AHCY,IQGAP3,TP53,TYMS,HCFC1,NPAT,SKP2,HSPA8,ATE1,CCNF,GTSE1,PDS5A,TFRC,FANCA,DEK,PIM3,GADD45B,Calm1 (includes others),GDF15,CDK4,NUF2,MMS22L,SPAG5,RABL6,MAP4,SSTR5,KIF2C,CDC5L,RAD21,DHX9,MECP2,KHDRBS1,ING5,ID3,ARID3A,MCM3,KPNB1,CCNE1,MSH2,NUDT16,CDKN1A,PSAP,FBXO5,RAD51AP1,DLGAP5,SRSF2,RFW3,SMC1A,INTS3,ZW10,MYC,PIM1,MLLT3,XPO1,MYBL2,NUCKS1,ESCO2,USP28,SMC3,PELP1,WEE1,ORC6,RAD54L,CDCA2,DUSP1,RECQL4,XRCC6,RMI2,ARID1A,KIAA0101,GTF2I,BARD1,RNASEH2B,ZNF219,E2F3,PTGES3,RAD51,CSRP2B,P,MCM9,LRWD1,VAV2,TRIP13,TACC3,HAUS8,TUBG1,PRDM4,SMARCD1,BIRC5,TPP2,PPM1G,NBN,RPA2,MAPK14,PRKCI,CENPI,VAV3,KLF5,MSH6,DCTN1,BRCA2,TUBA1B,CCP110,MTBP,UBR2,mir-148,CDC7,RAN,SFPQ,PHACTR4,MKI67,RBL1,CHAF1A,ACIN1,INTS7,MXD3,RARA,TARDBP,PLCB1,IRS2,CEP250,ANAPC11,DNMT1,PABPC1,TIPIN,TOPBP1,CENPB,MDC1,RPA1,TFAP4,CCNO,PCNA,NSMCE2,GAB1,H2AFX,MBD4,E2F1,MSH5,CLSPN,MAPK7,SGOL1,HAUS6,CTC1,CDT1,FKBP1A,HMGB2,CAMK2N2,CHEK1,TRADD,TNKS,TOP2A,RFC2,MCM10,CEP152,mir-199,PIIF,DCK,CDC6,SPC25,SMC6,CDK1,NCAPG2,RRM1,FADD,FIS1,RAD54B,KIF15,CDKL2,SPDYA,MCM2,REV1,CIRBP,MMS19,FEN1,ZFP36L2,HINFP,POLH,MCM8,PFN1,PRPF19,LIMK2,MELK,TUBB,LMNB1,YWHAQ,STMN1,SRSF1,STAG1,EZH2,SNU13,BRCA1,RAD51C,FOSL2,CDC25A,NUBP1,BIRC6,RANBP1,S SRP1,SRSF3,CCNG2,Cdc42,SMC2,TUBE1,CASP2,NUAK1,TMPO,Paxip1,CDK2,RFC3,PRIMPOL,PA2G4,WDHD1,DTYMK,MCM4,POLR2A,Ppp1cc,PPP1R9B,G MNN,PMF1/PMF1-BGLAP,TCP1,CDCA5,ARSB,IPO5,E2F8,DTL,RASSF1,MAP2K7,UHRF1,SNRNP,HAT1,let-7,ERBB3,USP1,ITPA,RPS27L,SMARCC1,TONSL,MIS12,CASP8AP2,LGALS1 |
| E2F3A    | Organismal Survival                   | 1.30E-10    | RAF1,MYH9,PRKAB2,KRAS,MTHFD2,AFMID,TP53,SLC2A1,CRKL,MAFF,SP4,ATE1,CCNF,APH1A,PDS5A,TFRC,GDF15,CDK4,TRIM27,MMP8,TLR7,DHX9,Mo cs1,KHDRBS1,MECP2,POLG,ID3,ARID3A,CCNE1,MSH2,CDKN1A,PSAP,FBXO5,TFB1M,MAP3K3,NDST3,SRSF2,RPGRIP1L,MYC,Gm21596/Hmgb1,EIF3D,ML LT3,MYBL2,BRIP1,ESCO2,RAD54L,MEOX1,KCNAB2,PFKM,DNAJC5,TFAM,DUSP1,XRCC6,RECQL4,NAGLU,RPSA,TFEB,ARID1A,GTF2I,BARD1,GPHN,E2F3,PTGES3,RAD51,DNAJB1,LRRC8A,WDR1,SLC20A1,POMT2,TACC3,TUBG1,Scd2,SNX27,NFATC4,BIRC5,GAN,TPP2,NBN,PRKCI,MAPK14,VAV3,EHD4,KLF5,MSH6,DCTN1,BRCA2,ACTL6B,UBR2,CDC7,RAN,ERI1,MKI67,RBL1,RICTOR,CHAF1A,RARA,ABCC1,TARDBP,PLCB1,IRS2,DNMT1,PITPNB,THEM4,TOBP1,CENPB,ANGPTL6,PLEC,TFAP4,ITPR1,SH3GL1,PTBP1,PCNA,GAB1,AHI1,H2AFX,E2F1,MAPK7,CTC1,SNAI2,FKBP1A,ACVR2B,H2AFX,SP2,CHEK1,SRSF10,T NKS,RIF1,TCOF1,DGCR8,TOP2A,MCM10,KHSRP,RPS19,SUZ12,PIIF,PPP1R8,ACTB,DLX1,COPS3,CDK1,NCAPG2,FADD,SEN1,RAD54B,MCM2,REV1,MUT YH,FEN1,ZFP36L2,NCAM1,PFN1,PRPF19,LAMTOR2,MMP16,MAP1B,MNS1,LMNB1,SRSF1,SIVA1,PTRH2,EZH2,SIAH2,BRCA1,RAD51C,FOSL2,DLC1,Fus,CD C25A,DNASE2,NUBP1,PSMC4,BIRC6,GSN,Abcb1b,SSRP1,WWP2,SRSF3,Cdc42,ARRB2,TIMELESS,MBTPS1,USE1,CASP2,Paxip1,CDK2,TEAD4,ZFAT,BRD2 ,MED23,PKM,ZMIZ1,ROR2,POLR2A,GMNN,RRN3,E2F8,DTL,RASSF1,SLC25A25,MAP2K7,TRA2B,UHRF1,HAT1,GABBR1,ERBB3,USP1,NFKBIZ,MLLT1,AFF1,I TPA,PBX3,SPR,SMARCC1                                                                                                                                                                                                                                                         |
| E2F3A    | Embryonic Development                 | 1.30E-10    | RAF1,UBR2,CDC7,KRAS,PHACTR4,RBL1,RICTOR,CHAF1A,MXD3,RARA,TARDBP,MTHFD2,IRS2,DNMT1,TP53,SLC2A1,TOBP1,ANGPTL6,ATE1,PCNA,CC NF,APH1A,E2F1,MSH5,MAPK7,PIM3,CDK4,ACVR2B,SP2,CHEK1,NEIL3,TNKS,TCOF1,MCM10,DHX9,PTK7,STT3B,RPS19,SUZ12,SEC24B,PPP1R8,POLG,IN G5,ID3,COPS3,NCAPG2,ARID3A,FADD,MTHFD1L,CCNE1,SPDYA,MSH2,CDKN1A,SHMT1,FBXO5,FEN1,TFB1M,NCAM1,DLGAP5,PFN1,PRPF19,MAP1B,RPG RIP1L,LMNB1,MYC,PIM1,EZH2,MYBL2,BRCA1,DLC1,ESCO2,PSMC4,MEOX1,SRSF3,Cdc42,TIMELESS,Paxip1,CDK2,RPSA,TEAD4,ZFAT,ARID1A,RAB23,E2F 3,ZMIZ1,RAD51,ROR2,Ppp1cc,GMNN,RRN3,DNAJB1,LRWD1,E2F8,RASSF1,DTL,POMT2,TACC3,UHRF1,TRA2B,TUBG1,ERBB3,USP1,NFATC4,MTHFD1,BIR C5,TPP2,NBN,AFF1,MAPK14,KLF5,DCTN1,BRCA2,LGALS1                                                                                                                                                                                                                                                                                                                                                                                                                                                                                                                                                                                                                                                                                                                                                                                                                                                                           |
| E2F3A    | Developmental Disorder                | 1.30E-10    | RAF1,PRPF19,PFN1,LAMTOR2,MMP16,UBR2,MAP1B,KRAS,RBL1,CHAF1A,SMC1A,MYC,Gm21596/Hmgb1,PIM1,EZH2,RARA,BRCA1,FOSL2,CDC25A,ESCO 2,TP53,SMC3,DNASE2,SLC2A1,PSMC4,BIRC6,ORC6,RANBP1,MAFF,SRSF3,SH3GL1,PCNA,DNAJC5,RECQL4,H2AFX,PDS5A,TFRC,MAPK7,Paxip1,CDK2,R PSA,TEAD4,PIM3,MED23,SNAI2,CDT1,CDK4,ACVR2B,E2F3,SP2,PTGES3,CHEK1,SRSF10,RAD51,TRIB1,POLR2A,GMNN,TCOF1,RRN3,MCM10,DNAJB1,RA D21,E2F8,DTL,SLC20A1,POMT2,RPS19,TACC3,SUZ12,MECP2,UHRF1,TUBG1,CDC6,POLG,SNX27,NFATC4,BIRC5,COPS3,ARID3A,NBN,FADD,CCNE1,PRK CI,MAPK14,ITPA,KLF5,CDKN1A,FBXO5,BRCA2,FEN1,SPR                                                                                                                                                                                                                                                                                                                                                                                                                                                                                                                                                                                                                                                                                                                                                                                                                                                                                                                                                                                                        |
| E2F3A    | RNA Post-Transcriptional Modification | 1.94E-10    | HNRNPL,SRSF2,PRPF19,SFPQ,DDX20,ACIN1,INTS3,SRSF1,INTS7,RCL1,TARDBP,HNRNPUL1,PLCB1,HNRNPA0,PABPC1,HCFC1,NUFIP1,RBFOX2,Scaf1,S RSF3,PTBP1,SRSF7,CPSF3L,SRSF4,RBM39,HNRNPA2B1,BARD1,WDHD1,USP39,SRSF10,TRA2A,POLR2A,CLP1,NOP58,DBR1,KHSRP,CDC5L,DIS3,RPS19 ,HNRNPU,MECP2,TRA2B,KHDRBS1,PPP1R8,NOP56,MAGOH,DDX39B,RBM6,CSTF3                                                                                                                                                                                                                                                                                                                                                                                                                                                                                                                                                                                                                                                                                                                                                                                                                                                                                                                                                                                                                                                                                                                                                                                                                                             |

## Supplemental Table 7. General IPA functions for E2F1, E2F3A and E2F3B promoter targets

| ChIP-seq | Category                          | B-H p-value | Genes                                                                                                                                                                                                                                                                                                                                                                                                                                                                                                                                                                                                                                                                                                                                                                                                                                                                                                                                                                                                                                                                                                                                                                                                                                                                                                                                                                                                                                                                                                                                                                                                                                                                                                                                                                                                                                                                                              |
|----------|-----------------------------------|-------------|----------------------------------------------------------------------------------------------------------------------------------------------------------------------------------------------------------------------------------------------------------------------------------------------------------------------------------------------------------------------------------------------------------------------------------------------------------------------------------------------------------------------------------------------------------------------------------------------------------------------------------------------------------------------------------------------------------------------------------------------------------------------------------------------------------------------------------------------------------------------------------------------------------------------------------------------------------------------------------------------------------------------------------------------------------------------------------------------------------------------------------------------------------------------------------------------------------------------------------------------------------------------------------------------------------------------------------------------------------------------------------------------------------------------------------------------------------------------------------------------------------------------------------------------------------------------------------------------------------------------------------------------------------------------------------------------------------------------------------------------------------------------------------------------------------------------------------------------------------------------------------------------------|
| E2F3A    | Cellular Growth and Proliferation | 2.28E-09    | RAF1,RMI1,MYH9,POLA1,KRAS,IFT80,SKAP2,C6orf89,RCL1,FHL2,EIF3B,SCPEP1,AHCY,TYMS,TP53,PEAK1,SLC2A1,CRKL,RRM2,MAFF,SKP2,HSPA8,MICU1,ACER3,CCNF,ANAPC5,TFRC,ZYX,ELMO2,FANCA,PIM3,GADD45B,HNRNPA2B1,GDF15,CDK4,MTCH1,RABL6,TRIM27,MMP8,ALMS1,SSTR5,TLR7,KIF2C,RAD21,DHX9,STT3B,SERTAD2,HNRNPU,KHDRBS1,MECP2,DROSHA,POLG,ING5,SLC29A1,ID3,ARID3A,MCM3,CCNE1,MSH2,NUDT16,MAZ,CDKN1A,PSAP,TCF19,SHMT1,PLEKHA1,MAP3K3,PPIL1,EEF1A1,DLGAP5,SRSF2,RPGRIP1L,NUDC,SMC1A,MYC,Gm21596/Hmgb1,PIM1,MLLT3,MYBL2,CNOT6,BRIP1,KLF11,EIF4B,SMC3,USP28,OSBPL1A,PELP1,GABPB2,WEE1,RBFOX2,CDCA2,ATAD2,TFAM,DUSP1,RECQL4,XRCC6,PIDD1,RPSA,RBBP4,ARID1A,KIAA0101,KLF10,GTTF2I,BARD1,RNASEH2B,GPHN,E2F3,PTGES3,CDCA7,RAD51,TRA2A,NOP58,DNAJB1,MCM9,LRRC8A,SLC20A1,VAV2,TACC3,RPRD1B,CHERP,UPP1,PRDM4,NFATC4,G3BP1,MTHFD1,ZSCAN21,BIRC5,PPM1G,TPP2,NBN,PMP22,PRKCI,MAPK14,EHD4,VAV3,KLF5,BRCA2,PLEKHA2,HNRNPL,MTBP,GFER,KC,NJ16,CDC7,mir-148,RAN,SFPQ,ERI1,ARHGEF1,DDX20,MKI67,RAPH1,RBL1,RICTOR,HIST1H2AB,ACIN1,MXD3,ABCC1,RARA,TARDBP,HADHB,IRS2,DNMT1,THEM4,GET4,HNRNPA0,TIPIN,TOPBP1,ANGPTL6,CENPB,PLEC,YWHAZ,RPA1,TFAP4,ITPR1,SH3GL1,CCNO,PTBP1,PCNA,SSBP1,RFC4,GAB1,PSMB2,H2AFX,E2F1,CLSPN,MAPK7,CTC1,SNAI2,CDT1,FKBP1A,HMGB2,CAMK2N2,SP2,H2AFZ,CHEK1,TRADD,TRIB1,NEIL3,TKNS,TCOF1,DGCR8,TOP2A,LIPG,TXNL1,MCM10,FKBP5,RPS19,mir-199,DCK,SUZ12,PIIF,PPP1R8,ACTB,CDC6,NAP1L1,COPS3,CDK1,RRM1,FADD,FIS1,SEN1,KIF15,FTL,SPDYA,MCM2,RBM6,CIRBP,NOP2,FEN1,GCAT,DNP,H1,ZFP36L2,NCAM1,POLH,MCM8,PRPF19,PFN1,CAV2,LAMTOR2,MAP1B,MELK,TUBB,PBK,LMNB1,YWHAQ,STMN1,SRSF1,STAG1,EZH2,FOSL2,BRCA1,DL,C1,Fus,CDC25A,MCM5,NUBP1,PSMC4,BIRC6,RANBP1,Abcb1b,GSN,BAG4,WWP2,SRSF3,ARRB2,CCNG2,Cdc42,TIMELESS,CASP2,NUAK1,TMPO,Paxip1,ELK4,CDK2,TAGLN2,RFC3,KDM3A,TEAD4,COPS4,PA2G4,PKM,AKIP1,DTYMK,MCM4,ZMIZ1,ROR2,PPP1R9B,PCK2,GMNN,RRN3,TCP1,CDCA5,E2F8,DTL,RA,SSF1,MAP2K7,UHRF1,HAT1,let-7,GABBR1,ERBB3,USP1,MLLT1,AFF1,PBX3,ACAT1,LGALS1 |
| E2F3A    | Cell Death and Survival           | 3.55E-09    | RAF1,MYH9,PRKAB2,KRAS,FHL2,EIF3B,SPA17,VAMP3,TYMS,TP53,SLC2A1,CRKL,RRM2,SKP2,HSPA8,APH1A,ZYX,TFRC,FANCA,DEK,PIM3,Calm1 (includes others),GADD45B,Dleu2,GDF15,CDK4,MTCH1,NUF2,MMS22L,SPAG5,RABL6,MAP4,TRIM27,ALMS1,MMP8,TLR7,DIS3,RAD21,DHX9,HNRNPU,MECP2,KHDRBS1,DROSHA,TPK1,ING5,SLC29A1,ID3,PACRG,KPNB1,CCNE1,MSH2,CDKN1A,FBXO5,PSAP,MAP3K3,TFB1M,EEF1A1,SRSF2,TIMM50,NUP58,PIEZO1,CBX5,SMC1A,INTS3,MYC,Gm21596/Hmgb1,SMPD4,PIM1,MLLT3,XPO1,MYBL2,BRIP1,KLF11,EIF4B,SMC3,PELP1,WEE1,RAD54L,CDCA2,ATAD2,PFKM,TFAM,DNAJ5,DUSP1,XRCC6,NAGLU,PIDD1,RPSA,RBBP4,TFEB,ARID1A,KIAA0101,KLF10,BARD1,GPHN,E2F3,PTGES3,RAD51,CLP1,NOP58,DNAJB1,MCM9,LRRC8A,C10orf88,SLC20A1,VAV2,TACC3,HAUS8,HERPUD1,SMARCD1,NFATC4,BIRC5,PPM1G,TPP2,NBN,PMP22,PRKCI,MAPK14,CENPI,VAV3,EHD4,KLF5,MSH6,BRCA2,DCTN1,CCP110,MTBP,UBR2,mir-148,CDC7,RAN,GFER,SFPQ,ARHGEF1,DDX20,MKI67,RICTOR,RBL1,ACIN1,MXD3,ABCC1,RARA,TARDBP,HNRNPL1,PLCB1,IRS2,DNMT1,TOPBP1,CENPB,YWHAZ,PLEC,MDC1,RPA1,SPG7,TFAP4,ITPR1,PCNA,GAB1,AHI1,H2AFX,MBD4,E2F1,TMX1,TBC1D15,MSH5,CLSPN,MAPK7,SNAI2,CDT1,FKBP1A,BOK,HMGB2,ACVR2B,CAMK2N2,CHEK1,TRIB1,TRADD,TKNS,TCOF1,DGCR8,TOP2A,MCM10,FKBP5,PCBP2,NSMCE1,RPS19,DUT,mir-199,PIIF,SUZ12,DCK,PPP1R8,ACTB,SPC25,CDC6,DLX1,NCAPG2,CDK1,RRM1,FADD,RAD54B,FIS1,SEN1,SPDYA,MCM2,CTNBL1,REV1,CIRBP,MUTYH,GPR180,FEN1,ZFP36L2,GLS2,POLH,NCAM1,MCM8,PRPF19,PFN1,CLN8,LAMTOR2,MAP1B,MELK,LIMK2,ZNF91,TUBB,PBK,LMNB1,YWHAQ,STMN1,SRSF1,SIVA1,PTRH2,STAG1,EZH2,RYR3,SIAH2,NAA16,INIP,BRCA1,FOSL2,RAD51C,DLG1,CDC25A,P4HB,PJA1,DNASE2,BIRC6,PSMC4,RANBP1,Abcb1b,GSN,SSRP1,MED14,BAG4,WWP2,Cdc42,ARRB2,USE1,CASP2,MBTPS1,NUAK1,TBCCD1,Paxip1,CDK2,TEX261,TAGLN2,KDM3A,PAFAH1B2,BRD2,PA2G4,Pcnt,PKM,DTYMK,ROR2,Ppp1cc,POLR2A,PCK2,PPP1R9B,GMNN,RRN3,TCP1,ARSB,E2F8,RASSF1,DTL,MAP2K7,UHRF1,HAT1,let-7,GABBR1,GPT,ERBB3,PSMA1,NFKBIZ,AFF1,PBX3,ACAT1,SPR,TONSL,SMARCC1,CASP8AP2,LANCL2,LGALS1                         |



## Supplemental Table 7. General IPA functions for E2F1, E2F3A and E2F3B promoter targets

| ChIP-seq | Category | B-H p-value | Genes                                                                                                                                                                                                                                                                                                                                                                                                                                                                                                                                                                                                                                                                                                                                                                                                                                                                                                                                                                                                                                                                                                                                                                                                                                                                                                                                                                                                                                                                                                                                                                                                                                                                                                                                                                                                                                                                                                                                                                                                                                                                                                                                                                                                                                                                                                                                                                                                                                                                                                                                                                                                                                                                                                                                                                                                                                                                                                                                                                                                                                                                                                                                                                                                                                                                                                                                                                                                                                                                                                                                                                                                                                                                                                                                                                                                                                                                                                                                                                                                                                                                                                                                                                                                                                                                                                                                                                                                                                                                                                                                                                                                                                                                                                                                                                                                                                                                                                      |
|----------|----------|-------------|------------------------------------------------------------------------------------------------------------------------------------------------------------------------------------------------------------------------------------------------------------------------------------------------------------------------------------------------------------------------------------------------------------------------------------------------------------------------------------------------------------------------------------------------------------------------------------------------------------------------------------------------------------------------------------------------------------------------------------------------------------------------------------------------------------------------------------------------------------------------------------------------------------------------------------------------------------------------------------------------------------------------------------------------------------------------------------------------------------------------------------------------------------------------------------------------------------------------------------------------------------------------------------------------------------------------------------------------------------------------------------------------------------------------------------------------------------------------------------------------------------------------------------------------------------------------------------------------------------------------------------------------------------------------------------------------------------------------------------------------------------------------------------------------------------------------------------------------------------------------------------------------------------------------------------------------------------------------------------------------------------------------------------------------------------------------------------------------------------------------------------------------------------------------------------------------------------------------------------------------------------------------------------------------------------------------------------------------------------------------------------------------------------------------------------------------------------------------------------------------------------------------------------------------------------------------------------------------------------------------------------------------------------------------------------------------------------------------------------------------------------------------------------------------------------------------------------------------------------------------------------------------------------------------------------------------------------------------------------------------------------------------------------------------------------------------------------------------------------------------------------------------------------------------------------------------------------------------------------------------------------------------------------------------------------------------------------------------------------------------------------------------------------------------------------------------------------------------------------------------------------------------------------------------------------------------------------------------------------------------------------------------------------------------------------------------------------------------------------------------------------------------------------------------------------------------------------------------------------------------------------------------------------------------------------------------------------------------------------------------------------------------------------------------------------------------------------------------------------------------------------------------------------------------------------------------------------------------------------------------------------------------------------------------------------------------------------------------------------------------------------------------------------------------------------------------------------------------------------------------------------------------------------------------------------------------------------------------------------------------------------------------------------------------------------------------------------------------------------------------------------------------------------------------------------------------------------------------------------------------------------------------------------|
| E2F3A    | Cancer   | 3.55E-09    | TIMM13,C6orf203,PPWD1,SKAP2,AFMID,PEAK1,CRKL,RANBP3,MRPL49,ELMO2,PIM3,RABL6,IBTK,MTMR3,POLR1E,ID3,KPNB1,MTHFD1L,EEF1A1,ZFP1,PIGU,CBX5,MATR3,ESCO2,RAD54L,KCNAB2,NAGLU,CBX3,TFEB,FEM1A,ELMOD2,KLF10,RAB23,RNASEH2B,GPHN,DDX27,C16orf59,TRIP13,TACC3,RNF26,Scd2,HERPUD1,SNX27,PPM1G,CENPI,ACTL6B,RER1,HNRNPL,MCM6,TUBA1B,ZFP62,ZNF628,UBR2,RNF38,CTDSP1,ZFP41,GJC3,HIST1H2AJ,PNKD,TLL5, DNMT1,LMF2,C19orf57,TMEM39B,GET4,MALL,PABPC1,CENPB,COMMD9,PLEC,CNOT10,ZMYM6,AP5Z1,SH3GL1,RNF168,FAM222A,NCLN,KIAA0368,HAUS6,SGOL1,SNAI2,MGME1,CDT1,BOK,FKBP1A,H2AFZ,TNKS,NEIL3,RIF1,RFC2,TXNL1,FKBP5,NSMCE1,NCBP3,PKN3,MCMBP,DUT,RRP1B,NUP85,CEP152,ZNF526,AP4M1,SMC6,COPS3,NCAPG2,RRM1,ADSS,SENP1,DUS3L,GPR180,COBL1,NCAM1,FMN3,PRPF19,MRPS17,TMCO1,ZNF91,PBK,RPUSD2,YWHAQ,FAM208A,FSD1L,BIRC6,GSN,SMC2,ZMIZ1,GNNG1,POLR2A,DSCR3,CNTLN,ZNF383,C1orf174,MLLT1,ZNF382,DSCC1,RPS27L,TRMT2A,TRIM59,TEX9,RAF1,MYH9,MTNR1A,IFT80,NKAP,C6orf89,RCL1,ZNF689,STAG3,TYMS,TUBGCP3,PAPD4,DNAJC9,GINM1,MDM1,SPATA20,ATE1,APH1A,GTSE1,ANAPC5,TFRC,ZYX,ZDHH1,FRG1,ANKLE1,RBM39,TRAPPC5,FKBP2,DEK,HNRNPA2B1,GDF15,CRIPT,CDK4,CCDC191,NUF2,TMEM209,GINS2,MAP4,ALG8,CDC5L,RAD21,DHX9,RBN1,SERTAD2,HNRNPU,MECP2,TPK1,ING5,LARP4B,SLC29A1,RUBCN,CCNE1,DDX39B,NUDT16,ABC2,CDKN1A,PSAP,BTF3L4,PPIL1,FOXN2,MEGF9,RFWD3,TIMM50,TSFM,PIEZO1,MYC,ZW10,SMPD4,GATC,XPO1,CACTIN,CNOT6,KLF11,EIF4B,POLR3C,SMC3,USP28,LIPT2,C3orf58,TMTC4,DDOST,MEOX1,RBFOX2,BTBD8,WDYHV1,DNAJC5,UGP2,XRCC6,RECQL4,SEPT10,SMCHD1,RBBP4,DENND4B,GPR19,TRA2A,RAD51,LYST,NOP58,VARS,LRRC8A,CN3,NM3,LRWD1,WDR1,SLC20A1,MED18,POMT2,HAUS8,CHERP,UPP1,MTHFD1,GAN,RPA2,TBL2,PRKCI,FAM111A,MAPK14,VAV3,KCNJ16,SFPQ,ARHGFE1,ER11,PHACTR4,RICTOR,ACIN1,ZNF367,ABCC1,EEFSEC,HNRNPUL1,HADHB,THEM4,OTUD4,CSR2,GPATC8,RPA1,ITPR1,UBQLN4,MIS18BP1,PCNA,RFC4,PSMB2,E2F1,TBC1D15,MSH5,CD2BP2,C12orf10,CAMK2N2,SP2,CHEK1,XYLB,TRIB1,POLR2M,MCM10,LIPG,PTK7,RPS19,TOR1AIP2,ATXN2L,WDR76,FTL,KIF15,SPDYA,MCM2,RBM6,UNK,FEN1,DNPH1,ZFP36L2,GLS2,POLH,XXYL1,MELK,TMEM30A,CCNL1,STMN1,USF3,ATG4C,C19orf43,EZH2,SIAH2,CIPC,ADPRHL2,RTCA,SSNA1,NUP155,ZNF212,RPL3,PSMC4,RANBP1,ARRB2,UBE2D2,C1orf27,NFYC,TMPO,TEX261,TAGLN2,RFC3,TEAD4,PAFAH1B2,MED23,NUP50,CENPP,PMF1/PMF1-BGLAP,C4orf27,ARSB,TM9SF1,DTL,SLC25A25,MAP2K7,DLGAP4,let-7,PPP4R3A,ANAPC13,KIF24,ZFP64,ITPA,ARHGAP31,SPR,TONSL,SMARCC1,LGALS1,SNTB2,KIF13B,ACAT2,POLA1,EIF4A2,EIF3B,GNL2,MAP1A,AHCY,HCFC1,NKTR,SLC2A1,NPAT,CD3EAP,UPF3B,MSMO1,SP4,CNTRL,ACER3,CCDC138,FANCA,GADD45B,DPM2,CPD,MTCH1,KPNA3,KHDRBS1,DROSHA,PASK,ARID3A,MCM3,MSH2,MAZ,COX7A2,FBXO5,TFB1M,NAV2,NUP58,RPGRI1,SMC1A,INTS3,UFP2,MLLT3,OSBPL1A,WEE1,CDCA2,OSBPL8,HIRIP3,TEF,DDX26B,KIAA0101,BARD1,ZNF219,E2F3,BCL7B,GTPBP2,VAV2,NAA40,SMARCD1,NFATC4,G3BP1,BIRC5,UMPS,KLF5,BCRA2,ZDHH1,CCP110,DEPDC1B,MTBP,RAN,mir-148,DDX20,MKI67,SLC15A4,RBL1,HIST1H2AB,RPS11,RARA,PYCR1,CNOT1,ANGPTL6,YWHAZ,MDC1,SPG7,UBE2G2,SSBP1,AAAS,AHI1,CPSF3L,DNAJC14,CLCC1,BRPF3,HMGB2,C9orf89,ATAD5,AKAP11,RAB33B,PIIF,SUZ12,SEC24B,SPC25,PAICS,NAP1L1,IQSEC2,CDK1,GLTP,CHRAC1,ATL2,CTNBL1,CALU,REV1,CIRBP,MMS19,SAAL1,OSGEPL1,CCDC62,PFN1,LAMTOR2,MAP1B,PPP1R18,ZNF609,RELL1,PTRH2,STAG1,RAB11FIP1,RYR3,TMUB2,CDCA3,HIST1H3J,FOSL2,C7orf50,MCM5,P4HB,NUPB1,STARD4,Cdc42,TIMELESS,CDIPT,USE1,NUAK1,TBCCD1,SLC35E1,CDK2,KDM3A,ZFAT,COPS4,BRD2,RASL11B,TMEM17,PA2G4,NUDT3,WDHD1,IPO9,PRIM1,GMNN,CDCA5,IPO5,RASSF1,MTRR,TRA2B,UHRF1,SNRNP,PANK2,COTL1,HAT1,ERBB3,RFC5,PPP1R16A,C19orf68,CIART,U2SURP,ACAT1,MIS12,HIST1H2AM,CASP8AP2,LANCL2,RMI1,PRKAB2,CLMP,HAUS4,KRAS,MMGT1,FHL2,SPA17,MTHFD2,SCPEP1,IQGAP3,T53,PCGF6,GRM8,RRM2,ADO,GINS3,ZC3H18,SKP2,HSPA8,TOMM22,SUPT16H,CCNF,PDS5A,CCDC51,TSSC4,SRSF4,CAPN7,LTN1,CYP39A1,GUCD1,CCDC167,WWC2,MMS22L,SPAG5,ZMYND19,IRF2BP1,TRIM27,RAD54L2,MMP8,SSTR5,RANGAP1,NOL12,TLR7,KIF2C,DIS3,STT3B,ECHS1,MRPL12,POLG,NXF1,GPR137C,CTDSP2,RIC8B,TMEM106C,ZCWPW1,TCF19,SHMT1,PLEKHA1,RAD51AP1,CSTF3,PPIP5K2,NUTF2,WRAP53,DLGAP5,NDST3,SRSF2,CCDC15,PRELID3B,KIF16B,IFT140,PIM1,EIF3D,PHF20,MYBL2,C17orf53,BRIP1,NUCKS1,PELP1,ZNF706,IER2,SNX18,IPO11,ORC6,MED9,ENK1,ATAD2,PFKM,MEF2B,SASH1,OR6C70,TFAM,DUSP1,SRSF7,RNF219,RPSA,ARID1A,VPS72,GTF2I,C14orf80,CDCA7,CSR2BP,CLP1,DBR1,DNAJB1,MCM9,ZNF280D,NOP56,TUBG1,PRDM4,ZSCAN21,ATL3,TPP2,NBN,PMP22,EHD4,MSH6,DCTN1,CDC7,RAPH1,CHAF1A,INTS7,MXD3,TARDBP,PLCB1,IRS2,CEP250,ANAPC11,CREBZF,PITPNB,NFXL1,HNRNPA0,TIPIN,SMIM8,ARL6IP6,TOBP1,RABL3,NUFIP1,TFAP4,WDR89,AP1S1,PTBP1,CCNO,NSMCE2,GAB1,H2AFX,TMX1,MBD4,ACY1,CLSPN,MAPK7,L3MBTL2,CTC1,XPOT,ACVR2B,SLBP,TRADD,TCOF1,CHAF1B,DGCR8,TOP2A,KHSRP,PCBP2,mir-199,DCK,ACTB,CDC6,RQCD1,ZBTB11,FADD,FIS1,RAD54B,CDKL2,TRAPPC10,MUTYH,NOP2,DENND1A,SEC62,SUPT3H,HINFP,MCM8,SZT2,MMP16,C5orf24,LIMK2,TUBB,UBA2,LMNB1,SRSF1,ARHGFE4,POLD3,RPS20,DNAJC8,NAA16,BCRA1,RAD51C,DLC1,CDC25A,PJA1,DNASE2,ZC3H6,SSRP1,MED14,BAG4,WWP2,SRSF3,CCNG2,TUBE1,MBTPS1,CASP2,BAZ1B,PLEKHH3,ELK4,GTF3C5,PKM,NSL1,MCM4,NFX1,ROR2,PCK2,RRN3,TCP1,E2F8,GABBR1,GPT,FCH |

## Supplemental Table 7. General IPA functions for E2F1, E2F3A and E2F3B promoter targets

| ChIP-seq | Category                            | B-H p-value | Genes                                                                                                                                                                                                                                                                                                                                                                                                                                                                                                                                                                                                                                                                                                                                                                                                                                                                                                                                                                                                                                                                                                                                                                                                                                                                                                                                                                                                                                                                                                                                                                                                                                                                                                                                                                                                                                                                                                                                                                                                                                                                                                                                                                                                                                                                                                                                                                                                                                                                                                                                                                                                                                                                                                                                                                                                                                                                                                                                                                                                                                                                                                                                                                                                                                                                                                                                                                                                                                                                                                                                                                                                                                                                                                                                                                                                                                                                                                                                                                                                                                                                                                                                                                                                                                                                                                                                                                                                                                                                                                                                                                                                                                                                                                                                                                                                                                                                                                                                                  |
|----------|-------------------------------------|-------------|--------------------------------------------------------------------------------------------------------------------------------------------------------------------------------------------------------------------------------------------------------------------------------------------------------------------------------------------------------------------------------------------------------------------------------------------------------------------------------------------------------------------------------------------------------------------------------------------------------------------------------------------------------------------------------------------------------------------------------------------------------------------------------------------------------------------------------------------------------------------------------------------------------------------------------------------------------------------------------------------------------------------------------------------------------------------------------------------------------------------------------------------------------------------------------------------------------------------------------------------------------------------------------------------------------------------------------------------------------------------------------------------------------------------------------------------------------------------------------------------------------------------------------------------------------------------------------------------------------------------------------------------------------------------------------------------------------------------------------------------------------------------------------------------------------------------------------------------------------------------------------------------------------------------------------------------------------------------------------------------------------------------------------------------------------------------------------------------------------------------------------------------------------------------------------------------------------------------------------------------------------------------------------------------------------------------------------------------------------------------------------------------------------------------------------------------------------------------------------------------------------------------------------------------------------------------------------------------------------------------------------------------------------------------------------------------------------------------------------------------------------------------------------------------------------------------------------------------------------------------------------------------------------------------------------------------------------------------------------------------------------------------------------------------------------------------------------------------------------------------------------------------------------------------------------------------------------------------------------------------------------------------------------------------------------------------------------------------------------------------------------------------------------------------------------------------------------------------------------------------------------------------------------------------------------------------------------------------------------------------------------------------------------------------------------------------------------------------------------------------------------------------------------------------------------------------------------------------------------------------------------------------------------------------------------------------------------------------------------------------------------------------------------------------------------------------------------------------------------------------------------------------------------------------------------------------------------------------------------------------------------------------------------------------------------------------------------------------------------------------------------------------------------------------------------------------------------------------------------------------------------------------------------------------------------------------------------------------------------------------------------------------------------------------------------------------------------------------------------------------------------------------------------------------------------------------------------------------------------------------------------------------------------------------------------------------------------|
| E2F3A    | Organismal Injury and Abnormalities | 3.55E-09    | TIMM13,C6orf203,PPWD1,SKAP2,AFMID,PEAK1,CRKL,RANBP3,MAFF,MRPL49,LCE3C,ELMO2,PIM3,RABL6,IBTK,MTMR3,POLR1E,ID3,KPNB1,MTHFD1L,EEF1A1,ZFP1,PIGU,CBX5,MATR3,ESCO2,RAD54L,KCNAB2,NAGLU,CBX3,FEM1A,ELMOD2,KLF10,RAB23,RNASEH2B,GPHN,DDX27,C16orf59,TRIP13,TACC3,RNF26,Scd2,HERPUD1,SNX27,PPM1G,CENPI,ACTL6B,RER1,HNRNPL,MCM6,TUBA1B,ZFP62,ZNF628,UBR2,RNF38,CTDSP1,ZFP41,GJC3,HIST1H2AJ,PNKD,TTL5,DNMT1,LMF2,C19orf57,TMEM39B,GET4,MALL,PABPC1,CENPB,COMMD9,PLEC,CNOT10,ZMYM6,AP5Z1,SH3GL1,RNF168,FAM222A,NCLN,KIAA0368,HAUS6,SGOL1,SNAI2,MGME1,CDT1,BOK,FKBP1A,H2AFZ,TNKS,NEIL3,RIF1,RFC2,TXNL1,FKBP5,NSMCE1,NCBP3,PKN3,MCMBP,DUT,RRP1B,NUP85,C19orf152,ZNF526,AP4M1,SMC6,COPS3,NCAPG2,RRM1,ADSS,SENP1,DUS3L,GPR180,COBLL1,NCAM1,FMNL3,PRPF19,MRPS17,TMCO1,ZNF91,PBK,RPUSD2,YWHAQ,FAM208A,FSD1L,MID1IP1,BIRC6,GSN,SMC2,ZMIZ1,GNG11,POLR2A,DSCR3,CNTLN,ZNF383,C1orf174,MLLT1,ZNF382,DSCC1,RPS27L,TRMT2A,TRIM59,TEX9,RAF1,MYH9,MTNR1A,IFT80,NKAP,C6orf89,RCL1,ZNF689,STAG3,TYMS,TUBGCP3,PAPD4,DNAJC9,GINM1,MDM1,SPATA20,ATE1,APH1A,GTS1,ANAPC5,TFRC,ZYX,ZDHHC1,FRG1,ANKLE1,RBM39,TRAPPC5,FKBP2,DEK,HNRNPA2B1,GDF15,CRIPT,CDK4,CCDC191,NUF2,TMEM209,GINS2,MAP4,ALG8,CDC5L,RAD21,DHX9,RBSN1,SERTAD2,HNRNPU,MECP2,TPK1,ING5,LARP4B,SLC29A1,RUBCN,CCNE1,DDX39B,NUDT16,ABC2,CDKN1A,PSAP,BTF3L4,PPIL1,FOXN2,MEGF9,RFWD3,TIMM50,TSFM,KXD1,PIEZO1,MYC,ZW10,SMPD4,GATC,XPO1,CACTIN,CNOT6,KLF11,EIF4B,POLR3C,SMC3,USP28,LIPT2,C3orf58,TMTC4,DDOST,MEOX1,RBFOX2,BTBD8,WDYHV1,DNAJC5,UGP2,XRCC6,RECQL4,SEPT10,SMCHD1,RBBP4,DENND4B,GPR19,TRA2A,RAD51,LYST,NOP58,VARS,LRRC8A,CNNM3,LRWD1,WDR1,SLC20A1,MED18,POMT2,HAUS8,CHERP,UPP1,MTHFD1,GAN,RPA2,TBL2,PRKCI,FAM111A,MAPK14,VAU3,KCNJ16,SFPQ,ARHGEF1,ERI1,PHACTR4,RICTOR,ACIN1,ZNF367,ABCC1,EEFSEC,HNRNPUL1,HADHB,THEM4,OTUD4,CSR2,GPATCH8,RPA1,ITPR1,UBQLN4,MIS18BP1,PCNA,RFC4,PSMB2,E2F1,TBC1D15,MSH5,CD2BP2,C12orf10,CAMK2N2,SP2,CHEK1,XYLB,TRIB1,POLR2M,MCM10,LIPG,PTK7,RPS19,TOR1AIP2,ATXN2L,WDR76,FTL,KIF15,SPDYA,MCM2,RBM6,UNK,FEN1,DNPH1,ZFP36L2,GLS2,POLH,XXYL1,MELK,TMEM30A,CCNL1,STMN1,USF3,ATG4C,C19orf43,EZH2,SIAH2,CIPC,ADPHL2,RTCA,SSNA1,NUP155,ZNF212,RPL3,PSMC4,RANBP1,ARRB2,UBE2D2,C1orf27,NFYC,TMPO,TEX261,TAGLN2,RFC3,TEAD4,PAFAH1B2,MED23,NUP50,CENPP,PMF1/PMF1-BGLAP,C4orf27,ARSB,TM9SF1,DTL,SLC25A25,MAP2K7,DLGAP4,IETD7,PPP4R3A,ANAPC13,KIF24,ZFP64,ITPA,ARHGAP31,SPR,TONSL,SMARCC1,LGALS1,SNTB2,KIF13B,ACAT2,POLA1,EIF4A2,EIF3B,GNL2,MAP1A,AHCY,HCFC1,NKTR,SLC2A1,NPAT,CD3EAP,UPF3B,MSMO1,SP4,CNTRL,ACER3,CCDC138,FANCA,GADD45B,DPM2,CPD,MTCH1,KPNA3,KHDRBS1,DROSHA,PASK,ARID3A,MCM3,MSH2,MAZ,COX7A2,FBXO5,TFB1M,NAV2,NUP58,RPGRIPL,SMC1A,INTS3,UFSP2,MLLT3,OSBPL1A,WEE1,CDCA2,OSBPL8,HIRIP3,TEF,DDX26B,KIAA0101,BARD1,ZNF219,E2F3,PTGES3,BCL7B,GTPBP2,VAU2,NAA40,SMARCD1,NFATC4,G3BP1,BIRC5,UMPS,KLF5,BRCA2,ZDHHC6,CCP110,DEPDC1B,MTBP,RAN,mir-148,DDX20,MKI67,SLC15A4,RBL1,HIST1H2AB,RPS11,RARA,PYCR1,CNOT1,ANGPTL6,YWHAZ,MDC1,SPG7,UBE2G2,SSBP1,AAAS,AHI1,CPSF3L,DNAJC14,CLCC1,BRPF3,HMGB2,C9orf89,ATAD5,AKAP11,RAB33B,PIIF,SUZ12,SEC24B,SPC25,PAICS,NAP1L1,IQSEC2,CDK1,GLTP,CHRAC1,ATL2,CTNBL1,CALU,REV1,CIRBP,MMS19,SAAL1,OSGEPL1,CCDC62,PFN1,LAMTOR2,MAP1B,PPP1R18,ZNF609,RELL1,PTRH2,STAG1,RAB11FIP1,RYR3,TMUB2,CDCA3,HIST1H3J,FOSL2,C7orf50,MCM5,P4HB,NUBP1,STARD4,Cdc42,TIMELESS,CDIPT,USE1,NUAK1,TBCCD1,SLC35E1,CDK2,KDM3A,ZFAT,COPS4,BRD2,RASL11B,TMEM17,PA2G4,NUDT3,WDHD1,IPO9,PRIM1,GMNN,CDCA5,IPO5,RASSF1,MTRR,TRA2B,UHRF1,SNRPB,PANK2,COTL1,HAT1,ERBB3,RFC5,PPP1R16A,C19orf68,CIART,U2SURP,ACAT1,MIS12,HIST1H2AM,CASP8AP2,LANCL2,RMI1,PRKAB2,CLMP,HAUS4,KRAS,MMGT1,FHL2,SPA17,MTHFD2,SCPEP1,IQGAP3,TNIP53,PCGF6,GRM8,RRM2,ADO,GINS3,ZC3H18,SKP2,HSPA8,TOMM22,SUPT16H,CCNF,PDS5A,CCDC51,TSSC4,SRSF4,CAPN7,LTN1,CYP39A1,GUCD1,CCDC167,WWC2,MMS22L,SPAG5,NECAB3,ZMYND19,IRF2BP1,TRIM27,RAD54L2,MMP8,SSTR5,RANGAP1,NOL12,TLR7,KIF2C,DIS3,STT3B,ECHS1,MRPL12,POU5F1,NXF1,GPR137C,CTDSP2,RIC8B,TMEM106C,ZCWPW1,TCF19,SHMT1,PLEKHA1,RAD51AP1,CSTF3,PPIP5K2,NUTF2,WRAP53,DLGAP5,NDST3,SRSF2,CCDC15,PREDL3B,KIF16B,IFT140,PIM1,EIF3D,PHF20,MYBL2,C17orf53,BRIP1,NUCKS1,PELP1,ZNF706,IER2,SNX18,IPO11,ORC6,MED9,ENKD1,ATAD2,PFKM,MEF2B,SASH1,ORC70,TFAM,DUSP1,SRSF7,RNF219,RPSA,ARID1A,VPS72,GTF2I,C14orf80,CDCA7,CSR2BP,CLP1,DBR1,DNAJB1,MCM9,ZNF280D,NOP56,TUBG1,PRDM4,ZSCAN21,ATL3,TPP2,NBN,PMP22,EHD4,MSH6,DCTN1,CDC7,RAPH1,CHAF1A,INTS7,MXD3,TARDBP,PLCB1,IRS2,CEP250,ANAPC11,CREBZF,PITPNB,NFXL1,HNRNPA0,TIPIN,SMIM8,ARL6IP6,TOBP1,RABL3,NUFIP1,TFAP4,WDR89,AP1S1,PTBP1,CCNO,NSMCE2,GAB1,H2AFX,TMX1,MBD4,ACY1,CLSPN,MAPK7,L3MBTL2,CTC1,XPOT,ACVR2B,SLBP,TRADD,TCOF1,CHAF1B,DGCR8,TOP2A,KHSRP,PCBP2,mir-199,DCK,ACTB,CDC6,RQCD1,ZBTB11,FADD,FIS1,RAD54B,CDKL2,TRAPPC10,MUTYH,NOP2,DENND1A,SEC62,SUPT3H,HINFP,MCM8,SZT2,MMP16,C5orf24,LIMK2,TUBB,UBA2,LMNB1,SRSF1,ARHGEF40,POLD3,RPS20,DNAJC8,NAA16,BRCA1,RAD51C,DLC1,CDC25A,PJA1,DNASE2,ZC3H6,SSRP1,MED14,BAG4,WWP2,SRSF3,CCNG2,TUBE1,MBTPS1,CASP2,BAZ1B,PLEKHH3,ELK4,GTF3C5,PKM,NSL1,MCM4,NFX1,ROR2,PCK2,RRN3,TCP1,E2F8,GABBR1,GPT,FCH |

## Supplemental Table 7. General IPA functions for E2F1, E2F3A and E2F3B promoter targets

| ChIP-seq | Category                    | B-H p-value | Genes                                                                                                                                                                                                                                                                                                                                                                                                                                                                                                                                                                                                                                                                                                                                                                                                                                                                                                                                                                                                                                                                                                                                                                                                                                                                                                                               |
|----------|-----------------------------|-------------|-------------------------------------------------------------------------------------------------------------------------------------------------------------------------------------------------------------------------------------------------------------------------------------------------------------------------------------------------------------------------------------------------------------------------------------------------------------------------------------------------------------------------------------------------------------------------------------------------------------------------------------------------------------------------------------------------------------------------------------------------------------------------------------------------------------------------------------------------------------------------------------------------------------------------------------------------------------------------------------------------------------------------------------------------------------------------------------------------------------------------------------------------------------------------------------------------------------------------------------------------------------------------------------------------------------------------------------|
| E2F3A    | Reproductive System Disease | 3.55E-09    | RAF1,MCM6,TUBA1B,CCP110,MYH9,C6orf203,POLA1,mir-148,SFPQ,KRAS,EIF4A2,MKI67,DDX20,ZNF367,FHL2,EIF3B,ABCC1,RARA,TARDBP,MTHFD2,HNRNPUL1,IRS2,CEP250,THEM4,HNRNPA0,TP53,TYMS,NFXL1,OTUD4,SMIM8,TOPBP1,PLEC,YWHAZ,RRM2,ITPR1,SKP2,UBE2G2,SH3GL1,PTBP1,PCNA,RFC4,APH1A,H2AFX,E2F1,ZYX,MAPK7,HAUS6,FRG1,ANKLE1,RBM39,GADD45B,CDT1,GDF15,CDK4,FKBP1A,CAMK2N2,CHEK1,TRIB1,NEIL3,MAP4,RABL6,MMP8,NOL12,TOP2A,TLR7,MCM10,KIF2C,KHSRP,FKBP5,CDC5L,RAD21,RPS19,mir-199,CEP152,CDC6,POLG,CDK1,RRM1,FADD,FIS1,RAD54B,CCNE1,MCM2,MSH2,MAZ,CDKN1A,TMEM106C,FBXO5,FEN1,ZFP36L2,NCAM1,FOXN2,EEF1A1,PFN1,SZT2,TMCO1,MMP16,MELK,TUBB,UBA2,CCNL1,SMC1A,YWHAQ,STMN1,MYC,PIM1,EZH2,RAB11FIP1,RYR3,XPO1,MYBL2,SH2,SIAH2,FOSL2,BRIP1,BRCA1,DLG1,KLF11,EIF4B,CDC25A,SMC3,USP28,P4HB,PELP1,IER2,WEE1,SNX18,RAD54L,RANBP1,GSN,SSRP1,BAG4,PFKM,WWP2,Cdc42,DUSP1,TUBE1,CASP2,NFYC,CBX3,CDK2,RFC3,TAGLN2,PAFAH1B2,MED23,ARID1A,KIAA0101,DENND4B,KLF10,PKM,BARD1,RNASEH2B,NUP50,E2F3,MCM4,CDCA7,TRA2A,RAD51,POLR2A,PRIM1,PCK2,GMNN,TCP1,VARS,E2F8,WDR1,RASSF1,VAV2,UHRF1,TRA2B,UPP1,TUBG1,let-7,ERBB3,NFATC4,RFC5,ANAPC13,ATL3,BIRC5,NBN,PRKCI,VAV3,DSCC1,MSH6,BRCA2,CAD,LGALS1                                                                                                                                                                                      |
| E2F3A    | Gene Expression             | 1.27E-08    | RAF1,POLA1,KRAS,NKAP,FHL2,EIF3B,IQGAP3,TP53,HCFC1,PCGF6,CD3EAP,NPAT,UPF3B,RANBP3,MAFF,SP4,HSPA8,SUPT16H,RBM39,DEK,HNRNPA2B1,WWC2,IRF2BP1,TRIM27,RAD54L2,IBTK,CDC5L,RAD21,DHX9,SERTAD2,HNRNPU,MECP2,KHDRBS1,DROSHA,MRPL12,ING5,NXF1,ID3,ARID3A,CCNE1,MSH2,CDKN1A,MAZ,TCF19,MAP3K3,TFB1M,SRSF2,CBX5,MYC,Gm21596/Hmgb1,EIF3D,PIM1,MATR3,XPO1,MYBL2,BRIP1,KLF11,POLR3C,EIF4B,OSBPL1A,P ELP1,Hmgn2 (includes others),ZNF706,GABPB2,MEOX1,RBFOX2,ATAD2,MEF2B,TFAM,DUSP1,XRCC6,PCBD2,CBX3,TEF,TFEB,ARID1A,VPS72,KLF10,GTF2I,RNASEH2B,ZNF219,E2F3,PTGES3,DNAJB1,LRWD1,SLC20A1,VAV2,TRIP13,RPRD1B,TUBG1,Scd2,PRDM4,NFATC4,ZSCAN21,BIRC5,PRKCI,MAPK14,VAV3,KLF5,BRCA2,PLEKHA2,UBR2,ZNF628,SOX12,SFPQ,DDX20,RBL1,CHAF1A,ZNF367,CTDSP1,MXD3,RARA,TARDBP,PLCB1,DNMT1,CREBZF,CNOT1,PTBP1,NUFIP1,YWHAZ,TFA P4,PTBP1,PCNA,GAB1,PSMB2,AHI1,H2AFX,E2F1,MAPK7,SNAI2,FKBP1A,HMGB2,ACVR2B,H2AFZ,SP2,SLBP,TRADD,TNKS,TOP2A,SUZ12,PPP1R8,DLX1,NAP1L1,CDK1,FADD,SEN1,NOP2,MMS19,SUPT3H,ZFP36L2,HINFP,NCAM1,CCDC62,PFN1,MELK,ZNF91,YWHAQ,PTRH2,EZH2,MID1IP1,SIAH2,CIPC,FOSL2,BRCA1,MCM5,GSN,SSRP1,Scaf1,MED14,WWP2,ARRB2,Cdc42,TIMELESS,NFYC,TMPO,ELK4,CDK2,TAGLN2,KDM3A,PRIMPOL,TEAD4,BRD2,MED23,PA2G4,PKM,ZMIZ1,NFX1,ROR2,POLR2A,GMNN,PMF1/PMF1-BGLAP,RRN3,E2F8,MAP2K7,UHRF1,let-7,NFKBIZ,MLLT1,AFF1,HIVEP2,ZNF382,CIART,PBX3,RPS27L,SMARCC1,LGALS1,LANCL2 |

## Supplemental Table 7. General IPA functions for E2F1, E2F3A and E2F3B promoter targets

| ChIP-seq | Category                 | B-H p-value | Genes                                                                                                                                                                                                                                                                                                                                                                                                                                                                                                                                                                                                                                                                                                                                                                                                                                                                                                                                                                                                                                                                                                                                                                                                                                                                                                                                                                                                                                                                                                                                                                                                                                                                                                                                                                                                                                                                                                                                                                                                                                                                                                                                                                                                                                                                                                                                                                                                                                                                                                                                                                                                                                                                                                                                                                                                                                                                                                                                                                                                                                                                                                                                                                                                                                                                                                                                                                                                                                                                                                                                                                                                                                                                                                                                                                                                                                                                                                                                                                                                                                                                                                                                                                                                                                                                                                                                                                                                                                                       |
|----------|--------------------------|-------------|-------------------------------------------------------------------------------------------------------------------------------------------------------------------------------------------------------------------------------------------------------------------------------------------------------------------------------------------------------------------------------------------------------------------------------------------------------------------------------------------------------------------------------------------------------------------------------------------------------------------------------------------------------------------------------------------------------------------------------------------------------------------------------------------------------------------------------------------------------------------------------------------------------------------------------------------------------------------------------------------------------------------------------------------------------------------------------------------------------------------------------------------------------------------------------------------------------------------------------------------------------------------------------------------------------------------------------------------------------------------------------------------------------------------------------------------------------------------------------------------------------------------------------------------------------------------------------------------------------------------------------------------------------------------------------------------------------------------------------------------------------------------------------------------------------------------------------------------------------------------------------------------------------------------------------------------------------------------------------------------------------------------------------------------------------------------------------------------------------------------------------------------------------------------------------------------------------------------------------------------------------------------------------------------------------------------------------------------------------------------------------------------------------------------------------------------------------------------------------------------------------------------------------------------------------------------------------------------------------------------------------------------------------------------------------------------------------------------------------------------------------------------------------------------------------------------------------------------------------------------------------------------------------------------------------------------------------------------------------------------------------------------------------------------------------------------------------------------------------------------------------------------------------------------------------------------------------------------------------------------------------------------------------------------------------------------------------------------------------------------------------------------------------------------------------------------------------------------------------------------------------------------------------------------------------------------------------------------------------------------------------------------------------------------------------------------------------------------------------------------------------------------------------------------------------------------------------------------------------------------------------------------------------------------------------------------------------------------------------------------------------------------------------------------------------------------------------------------------------------------------------------------------------------------------------------------------------------------------------------------------------------------------------------------------------------------------------------------------------------------------------------------------------------------------------------------------------------|
| E2F3A    | Gastrointestinal Disease | 2.05E-08    | <p> SNTB2,KIF13B,ACAT2,POLA1,PPWD1,EIF4A2,SKAP2,EIF3B,GNL2,MAP1A,AHCY,NKTR,HCFC1,PEAK1,SLC2A1,NPAT,UPF3B,RANBP3,MAFF,SP4,CNTRL,M<br/> RPL49,ACER3,ELMO2,CCDC138,FANCA,PIM3,DPM2,MTCH1,RABL6,IBTK,MTMR3,KPNA3,KHDRBS1,PASK,DROSHA,POLR1E,ID3,ARID3A,MCM3,KPNB1,M<br/> THFD1L,MSH2,MAZ,COX7A2,FBXO5,TFB1M,NAV2,EEF1A1,ZFP1,PIGU,NUP58,RPGRIP1L,CBX5,SMC1A,INTS3,UFPSP2,MATR3,MLLT3,ESCO2,OSBPL1A,WE<br/> E1,RAD54L,CDCA2,OSBPL8,NAGLU,HIRIP3,CBX3,TEF,DDX26B,FEM1A,ELMOD2,KIAA0101,KLF10,RAB23,BARD1,RNASEH2B,ZNF219,DDX27,E2F3,BCL7B,<br/> GTPBP2,C16orf59,VAV2,NAA40,TRIP13,TACC3,RNF26,Scd2,HERPUD1,NFATC4,SNX27,G3BP1,BIRC5,UMPS,PPM1G,CENPI,KLF5,BRCA2,ACTL6B,ZDHHC6<br/> ,RER1,HNRNPL,MCM6,CCP110,ZFP62,MTBP,UBR2,ZNF628,RAN,mir-<br/> 148,DDX20,MKI67,SLC15A4,RBL1,RNF38,CTDSP1,RARA,PNKD,TTLL5,DNMT1,LMF2,TMEM39B,GET4,PYCRL,MALL,PABPC1,CNOT1,CENPB,ANGPTL6,CO<br/> MMD9,PLEC,YWHAZ,MDC1,SPG7,CNOT10,AP5Z1,UBE2G2,RNF168,AAAS,FAM222A,AHI1,NCLN,CPSF3L,DNAJC14,KIAA0368,SGOL1,HAUS6,CLCC1,BRPF<br/> 3,SNAI2,MGME1,BOK,FKBP1A,HMGB2,C9orf89,ATAD5,AKAP11,NEIL3,TKNS,RIF1,RAB33B,RFC2,TXNL1,NSMCE1,FKBP5,PKN3,RRP1B,NUP85,CEP152,MC<br/> MBP,AP4M1,SUZ12,SEC24B,SPC25,SMC6,PAICS,IQSEC2,NAP1L1,COPS3,NCAPG2,CDK1,RRM1,GLTP,ADSS,SENP1,ATL2,CHRAC1,CTNBNB1,REV1,CIRB<br/> P,MMS19,DUS3L,SAAL1,GPR180,COBLL1,NCAM1,OSGEPL1,CCDC62,FMNL3,PFN1,LAMTOR2,MRPS17,TMCO1,MAP1B,PPP1R18,ZNF609,ZNF91,RPUSD2,<br/> PBK,RELL1,FAM208A,PTRH2,STAG1,RYR3,CDCA3,TMUB2,HIST1H3J,FOSL2,C7orf50,MCM5,P4HB,NUBP1,BIRC6,GSN,SMC2,TIMELESS,CDIPT,USE1,NUA<br/> K1,TBCCD1,SLC35E1,CDK2,KDM3A,COPS4,ZFAT,BRD2,RASL11B,TMEM17,PA2G4,NUDT3,WDHD1,ZMIZ1,IPO9,GMNN,CDCA5,IPO5,RASSF1,CNTLN,MTRR<br/> ,SNRPB,TRA2B,UHRF1,ZNF383,COTL1,PANK2,HAT1,ERBB3,RFC5,PPP1R16A,C19orf68,MLLT1,ZNF382,CIART,U2SURP,RPS27L,DSSC1,ACAT1,MIS12,TRM<br/> T2A,HIST1H2AM,TRIM59,CASP8AP2,RAF1,MYH9,PRKAB2,MTNR1A,CLMP,HAUS4,IFT80,KRAS,NKAP,C6orf89,MMGT1,RCL1,STAG3,IQGAP3,TYMS,TP53,T<br/> UBGCP3,PAPD4,PCGF6,GRM8,RRM2,GINM1,ADO,MDM1,GINS3,SPATA20,SKP2,ZC3H18,ATE1,HSPA8,TOMM22,SUPT16H,CCNF,PDS5A,GTSE1,ANAPC5,Z<br/> YX,TFRC,CCDC51,TSSC4,ZDHHC1,CAPN7,LTN1,FRG1,ANKLE1,RBM39,TRAPPC5,FKBP2,DEK,GUCD1,HNRNPA2B1,GDF15,CDK4,CCDC191,WWC2,NUF2,<br/> MMS22L,SPAG5,TMEM209,GINS2,ZMYND19,MAP4,TRIM27,IRF2BP1,RAD54L2,MMP8,RANGAP1,SSTR5,TLR7,ALG8,KIF2C,CDC5L,DIS3,RAD21,DHX9,RSBN<br/> 1,STT3B,SERTAD2,HNRNPU,ECHS1,MECP2,MRPL12,POLG,ING5,LARP4B,TPK1,NXF1,SLC29A1,GPR137C,RUBCN,CCNE1,DDX39B,ABCF2,NUDT16,RIC8B,<br/> CDKN1A,ZCWPW1,TCF19,PSAP,SHMT1,BTF3L4,PPIL1,CSTF3,RAD51AP1,PPIP5K2,WRAP53,NDST3,DLGAP5,CCDC15,MEGF9,RFWD3,TIMM50,TSFM,PIEZ<br/> O1,KIF16B,IFT140,MYC,SMPD4,PIM1,PHF20,GATC,XPO1,MYBL2,CACTIN,C17orf53,BRIP1,KLF11,NUCKS1,EIF4B,USP28,SMC3,PELP1,LIPT2,C3orf58,ZNF70<br/> 6,SNX18,TMTC4,IPO11,ORC6,DDOST,MEOX1,ENKD1,BTBD8,ATAD2,PFKM,MEF2B,SASH1,TFAM,UGP2,DUSP1,SRSF7,RECQL4,XRCC6,SEPT10,RNF219,S<br/> MCHD1,RBBP4,ARID1A,VPS72,DENND4B,C14orf80,GPR19,CDCA7,TRA2A,RAD51,CSR2BP,LYST,CLP1,NOP58,DNAJB1,VARA,MCM9,CNNM3,LRRC8A,LR<br/> WD1,WDR1,MED18,SLC20A1,POMT2,HAUS8,ZNF280D,NOP56,CHERP,TUBG1,PRDM4,ZSCAN21,MTHFD1,ATL3,GAN,TPP2,RPA2,NBN,TBL2,PMP22,MAPK<br/> 14,FAM111A,PRKCI,VAV3,EHD4,MSH6,DCTN1,CDC7,KCNJ16,SFPQ,ARHGEF1,ERI1,PHACTR4,RAPH1,RICTOR,CHAF1A,ACIN1,INTS7,ZNF367,MXD3,ABCC<br/> 1,TARDBP,HNRNPUL1,EEFSEC,PLCB1,IRS2,CEP250,ANAPC11,PITPNB,CREBZF,TIPIN,ARL6IP6,TOBP1,CSR2P,RABL3,GPATCH8,NUFIP1,RPA1,ITPR1,W<br/> DR89,UBQLN4,AP1S1,PTBP1,MIS18BP1,PCNA,NSMCE2,RFC4,GAB1,H2AFX,TMX1,ACY1,MBD4,E2F1,MSH5,TBC1D15,CLSPN,MAPK7,L3MBTL2,CTC1,CD2<br/> BP2,C12orf10,XPOT,ACVR2B,SP2,SLBP,CHEK1,XYLB,TRADD,TRIB1,POLR2M,TCOF1,DGCR8,TOP2A,LIPG,MCM10,PCBP2,KHSRP,PTK7,RPS19,mir-<br/> 199,DCK,ACTB,CDC6,RQCD1,TOR1AIP2,ATXN2L,FIS1,RAD54B,WDR76,FTL,KIF15,SPDYA,CDKL2,MCM2,RBM6,TRAPPC10,NOP2,MUTYH,DENND1A,UNK,S<br/> EC62,FEN1,SUPT3H,ZFP36L2,GLS2,HINFP,POLH,MCM8,SZT2,MMP16,XXYLT1,MELK,LIMK2,TUBB,UBA2,LMNB1,CCNL1,STMN1,USF3,SRSF1,ATG4C,ARH<br/> GEF40,POLD3,DNAJC8,EZH2,SH2,SH2,NAA16,CIPC,RAD51C,ADPRHL2,BRCA1,DLG1,RTCA,CDC25A,NUP155,DNASE2,PJA1,ZNF212,ZC3H6,RANBP1,SSRP1,<br/> MED14,BAG4,WWP2,UBE2D2,ARRB2,CCNG2,TUBE1,CASP2,MBTPS1,C1orf27,NFYC,BAZ1B,PLEKHH3,TMPO,TEX261,ELK4,RFC3,TAGLN2,TEAD4,MED23,<br/> GTF3C5,PKM,MCM4,CENPP,NFX1,ROR2,PCK2,RRN3,C4orf27,TCP1,ARSB,E2F8,TM9SF1,DTL,SLC25A25,MAP2K7,DLGAP4,let-<br/> 7,FCHSD2,GABBR1,GPT,PSMA1,USP1,NFKBIZ,IPP,AFF1,HIVP2,KIF24,ZFP64,ARHGAP31,SPR,CAD,TONSL,SMARCC1,LGALS1 </p> |
| E2F3A    | Cellular Compromise      | 2.60E-08    | <p> TP53,MCM8,TUBG1,KRAS,USP1,NBN,MYC,CCNE1,Gm21596/Hmgb1,MSH2,PIM1,RECQL4,H2AFX,CDKN1A,BRIP1,RAD51C,MCM9,BRCA1,FANCA,CDK2,PO<br/> LH,CDC25A,RASSF1 </p>                                                                                                                                                                                                                                                                                                                                                                                                                                                                                                                                                                                                                                                                                                                                                                                                                                                                                                                                                                                                                                                                                                                                                                                                                                                                                                                                                                                                                                                                                                                                                                                                                                                                                                                                                                                                                                                                                                                                                                                                                                                                                                                                                                                                                                                                                                                                                                                                                                                                                                                                                                                                                                                                                                                                                                                                                                                                                                                                                                                                                                                                                                                                                                                                                                                                                                                                                                                                                                                                                                                                                                                                                                                                                                                                                                                                                                                                                                                                                                                                                                                                                                                                                                                                                                                                                                    |

## Supplemental Table 7. General IPA functions for E2F1, E2F3A and E2F3B promoter targets

| ChIP-seq | Category                           | B-H p-value | Genes                                                                                                                                                                                                                                                                                                                                                                                                                                                                                                                                                                                                                                                                                                                                                                                                                                                                                                                                                                                                                                                                                                                                                                  |
|----------|------------------------------------|-------------|------------------------------------------------------------------------------------------------------------------------------------------------------------------------------------------------------------------------------------------------------------------------------------------------------------------------------------------------------------------------------------------------------------------------------------------------------------------------------------------------------------------------------------------------------------------------------------------------------------------------------------------------------------------------------------------------------------------------------------------------------------------------------------------------------------------------------------------------------------------------------------------------------------------------------------------------------------------------------------------------------------------------------------------------------------------------------------------------------------------------------------------------------------------------|
| E2F3A    | Cellular Assembly and Organization | 2.80E-08    | RAF1,CCP110,MYH9,POLA1,CDC7,RAN,SFPQ,KRAS,HAUS4,DDX20,RBL1,CHAF1A,STAG3,TARDBP,DNMT1,TP53,TUBGCP3,HCFC1,PCGF6,RPA1,TFAP4,SPG7,SKP2,RNF168,H2AFX,CCNF,PDS5A,E2F1,SGOL1,HAUS6,DEK,CTC1,CDT1,CRIPT,CDK4,FKBP1A,NUF2,USP39,MMS22L,SPAG5,CHEK1,TKNS,MAP4,RIF1, TOP2A,KIF2C,RAD21,DHX9,RPS19,CEP152,MCMBP,MECP2,PPP1R8,SPC25,CDC6,SMC6,TOR1AIP2,NCAPG2,CDK1,FIS1,SENP1,CCNE1,DDX39B,ATL2,NUDT16,CDKN1A,MMS19,FBXO5,PLEKHA1,DLGAP5,MCM8,PRPF19,CLN8,CAV2,RFWD3,TIMM50,MELK,LIMK2,TUBB,LMNB1,SMC1A,MYC,ZW10,INTS3,STMN1,PIM1,STAG1,XPO1,INIP,BRCA1,Nolc1,ESCO2,SMC3,NUP155,NUBP1,ORC6,RAD54L,RANBP1,GSN,CDCA2,SSRP1,CCNG2,Cdc42,SMC2,XRCC6,MBTPS1,USE1,NAGLU,HIRIP3,BAZ1B, TMPO,CBX3,CDK2,RBBP4,KDM3A,TFEB,ARID1A,Pcnt,KIAA0101,BARD1,WDHD1,MCM4,PTGES3,RAD51,LYST,PPP1R9B,GMNN,RRN3,PMF1/PMF1-BGLAP,CDCA5,ARSB,MCM9,LRWD1,RASSF1,TRIP13,TACC3,HAUS8,UHRF1,TUBG1,ATL3,BIRC5,TPP2,NBN,RPA2,PRKCI,MAPK14,ITPA,DCTN1,BRCA2,TONSL,MIS12,RAB6A                                                                                                                                                                                                                                      |
| E2F3A    | Cellular Development               | 1.99E-07    | RAF1,RMI1,MTBP,RAN,mir-148,SFPQ,ARHGEF1,KRAS,MKI67,RICTOR,RBL1,ACIN1,FHL2,EIF3B,RARA,TARDBP,IRS2,AHCY,THEM4,TP53,TYMS,PEAK1,SLC2A1,TOBPBP1,CRKL,CENPB,YWHAZ,RRM2,ITPR1,SKP2,SH3GL1,PTBP1,MICU1,PCNA,SSBP1,GAB1,RFC4,CCNF,E2F1,TFRC,MAPK7,FANCA,PIM3,CTC1,GADD45B,CDT1,GDF15,HNRNPA2B1,CDK4,CAMK2N2,H2AFZ,SP2,CHEK1,TRADD,RABL6,TKNS,MMP8,SSTR5,DGCR8,KIF2C,FKBP5,RAD21,DHX9,STT3B,mir-199,KHDRBS1,PIIF,SUZ12,ACTB,DROSHA,CDC6,POLG,ID3,COPS3,CDK1,RRM1,ARID3A,FADD,SENP1,FTL,CCNE1,SPDYA,MCM2,CIRBP,CDKN1A,SHMT1,GCAT,FEN1,PPIL1,POLH,NCAM1,SRSF2,DLGAP5,EEF1A1,MCM8,PRPF19,PFN1,CAV2,MAP1B,MELK,TUBB,LMNB1,PBK,SMC1A,STMN1,MYC,YWHAQ,SRSF1,PIM1,STAG1,EZH2,MLLT3,MYBL2,BRCA1,FOSL2,DLCL1,CDC25A,EIF4B,SMC3,PELP1,NUBP1,BIRC6,ATAD2,CDCA2,SRSF3,Cdc42,CCNG2,DUSP1,RECQL4,CASP2,XRCC6,CDK2,ELK4,RFC3,TAGLN2,TEAD4,COPS4,ARID1A,PA2G4,KIAA0101,GTF2I,KLF10,BARD1,PKM,RNASEH2B,E2F3,PTGES3,ZMIZ1,TRA2A,RAD51,PCK2,PPP1R9B,GMNN,NOP58,TCP1,CDCA5,MCM9,E2F8,RASSF1,DTL,MAP2K7,UHRF1,RPRD1B,HAT1,let-7,ERBB3,NFATC4,BIRC5,TPP2,NBN,AFF1,PMP22,MAPK14,PRKCI,PBX3, VAV3,KLF5,ACAT1,BRCA2,LGALS1                                                                                |
| E2F3A    | Cellular Function and Maintenance  | 2.17E-07    | RAF1,MCM8,CCP110,PRPF19,POLA1,RAN,SFPQ,RBL1,SMC1A,CHAF1A,STMN1,MYC,Gm21596/Hmgb1,EZH2,XPO1,BRIP1,BRCA1,Nolc1,TP53,TUBGCP3,NUP155,NUBP1,RAD54L,RANBP1,RPA1,SSRP1,RNF168,PCNA,SMC2,H2AFX,XRCC6,CCNF,E2F1,CDK2,KDM3A,DEK,CTC1,ARID1A,Pcnt,CDK4,WDHD1,PTGES3,CHEK1,SPAG5,RAD51,MAP4,TKNS,RIF1,RRN3,RAD21,LRWD1,RPS19,TACC3,CEP152,HAUS8,TUBG1,SPC25,BIRC5,TPP2,RPA2,NBN,MSH2,ITPA,REV1,NUDT16,CDKN1A,BRCA2,DCTN1                                                                                                                                                                                                                                                                                                                                                                                                                                                                                                                                                                                                                                                                                                                                                           |
| E2F3A    | Cell Morphology                    | 2.17E-07    | DEK,MCM8,PRPF19,RAN,LMNB1,CHAF1A,CHEK1,RAD51,MAP4,RIF1,Gm21596/Hmgb1,EZH2,GMNN,MCM9,BRCA1,DNMT1,RASSF1,TP53,TACC3,TUBG1,ORC6,RAD54L,TFAP4,RPA1,CDK1,NCAPG2,SKP2,NBN,RNF168,PCNA,SMC2,REV1,XRCC6,H2AFX,CDKN1A,BRCA2,FBXO5, TMPO,RBBP4                                                                                                                                                                                                                                                                                                                                                                                                                                                                                                                                                                                                                                                                                                                                                                                                                                                                                                                                   |
| E2F3A    | Hematological Disease              | 4.30E-06    | MCM6,TUBA1B,RAF1,MYH9,MTNR1A,PPWD1,POLA1,RAN,mir-148,KRAS,MKI67,RPS11,CHAF1A,MXD3,ABCC1,RARA,HADHB,EEFSEC,PNKD,MAP1A,DNMT1,C19orf57,LMF2,PYCRL,TP53,TYMS,PABPC1,NKTR,NPAT,NUFIP1,RRM2,YWHAZ,MSMO1,MDC1,RANBP3,RPA1,ITPR1,MDM1,SKP2,SH3GL1,PCNA,PSMB2,AHI1,H2AFX,CCNF,APH1A,PDS5A,E2F1,SRSF4,FRG1,FANCA,L3MBTL2,DEK,SNAI2,GADD45B,CRIPT,CPD,DPM2,GDF15,CDK4,FKBP1A,MMS22L,CHEK1,TRIB1,TKNS,RIF1, TOP2A,TLR7,NCBP3,KIF2C,DIS3,RAD21,MTMR3,RPS19,mir-199,ZNF526,SUZ12,DCK,SEC24B,ACTB,PASK,NAP1L1,ID3,CDK1,RRM1,KPNB1,FADD,RAD54B,MTHFD1L,MSH2,REV1,MUTYH,CDKN1A,SHMT1,GPR180,FE N1,ZFP36L2,CSTF3,NUTF2,NCAM1,EEF1A1,NAV2,SRSF2,ZNF609,MELK,TMEM30A,TUBB,ZNF91,KIF16B,SMC1A,FAM208A,MYC,STMN1,SRSF1,Gm21596/Hmgb1,RPS20,STAG1,EIF3D,PIM1,EZH2,MLLT3,XPO1,CACTIN,BRCA1,DLCL1,CDC25A,MCM5,OSBPL1A,SMC3,ZNF212,RPL3,WEE1,SNX18,BIRC6,RAD54L,RANBP1,GSN,CDCA2,MEF2B,Cdc42,TUBE1,XRCC6,CASP2,RECQL4,CDK2,RBBP4,RPSA,BRD2,ARID1A,DENND4B,GTF2I,BARD1,GPHN,DDX27,E2F3,ZMIZ1,RAD51,ROR2,PRIM1,PMF1/PMF1-BGLAP,IPO5,LRRC8A,E2F8,CNTLN,RASSF1,SLC20A1,SNRPB,HAT1,TUBG1,let-7,GABBR1,USP1,MTHFD1,G3BP1,BIRC5,TPP2,MLLT1,NBN,PRKCI,PBX3,MSH6,ARHGAP31,BRCA2,SMARCC1,CAD,LANCL2,LGALS1 |

## Supplemental Table 7. General IPA functions for E2F1, E2F3A and E2F3B promoter targets

| ChIP-seq | Category                                   | B-H p-value | Genes                                                                                                                                                                                                                                                                                                                                                                                                                                                                                                                                                                                                                                                                                                                                                                                                               |
|----------|--------------------------------------------|-------------|---------------------------------------------------------------------------------------------------------------------------------------------------------------------------------------------------------------------------------------------------------------------------------------------------------------------------------------------------------------------------------------------------------------------------------------------------------------------------------------------------------------------------------------------------------------------------------------------------------------------------------------------------------------------------------------------------------------------------------------------------------------------------------------------------------------------|
| E2F3A    | Immunological Disease                      | 4.30E-06    | RAF1,PPWD1,POLA1,mir-148,RAN,KRAS,MKI67,CHAF1A,MXD3,RARA, DNMT1,LMF2,TP53,TYMS,PABPC1, PYCRL,NPAT,RRM2,YWHAZ,MDC1,RANBP3,RPA1,SKP2,PCNA,AHI1,PSM B2,H2AFX,CCNF,APH1A,E2F1,FRG1,DEK,GADD45B,GDF15,CDK4,FKBP1A,CHEK1,SSTR5, TOP2A,TLR7,KIF2C,DIS3,RAD21,MTMR3,SUZ12,DCK,KHDRBS1,NAP1L1,ID3,CDK1,RRM1,KPNB1,FADD,RAD54B,MTHFD1L,MSH2,MUTYH,CDKN1A,FEN1,CSTF3,NUTF2,NCAM1,SRSF2,TUBB,TMEM30A,ZNF91,SMC1A,MY C,STMN1,SRSF1,Gm21596/Hmgb1,PIM1,EZH2,XPO1,BCRA1,DLC1,MCM5,RPL3,BIRC6,RAD54L,RANBP1,GSN,CDCA2,MEF2B,Cdc42,TUBE1,XRCC6,CASP2, RECQL4,CDK2,BRD2,ARID1A,GTF2I,ZMIZ1,RAD51,ROR2,PRIM1,PMF1/PMF1-BGLAP,IPO5,LRRC8A,RASSF1,SNRNP,HAT1,TUBG1,let-7,GABBR1,G3BP1,BIRC5,NBN,PRKCI,MSH6,BRCA2,SMARCC1,CAD,LANCL2,LGALS1                                                                                               |
| E2F3A    | Connective Tissue Development and Function | 4.54E-06    | SRSF2,RAF1,MCM8,PRPF19,MTBP,CDC7,SFPQ,KRAS,ARHGEF1,RBL1,RICTOR,LMNB1,MYC,STMN1,SRSF1,EIF3B,STAG1,EZH2,RARA,MYBL2,FOSL2,BR CA1,AHCY,CDC25A,TP53,SMC3,PELP1,SSRP1,SKP2,SH3GL1,Cdc42,GAB1,DUSP1,XRCC6,RECQL4,CCNF,MBD4,E2F1,TFRC,FANCA,CDK2,PIM3,CTC1,ARI D1A,GADD45B,PA2G4,KIAA0101,GTF2I,CDK4,RNASEH2B,E2F3,SP2,ZMIZ1,PTGES3,CHEK1,TRADD,MAP4,NOP58,CDCA5,MCM9,DHX9,RASSF1,MAP2K7,M ECP2,KHDRBS1,PPIF,SUZ12,HAT1,ACTB,CDC6,let-7,ERBB3,ID3,TPP2,ARID3A,NBN,FADD,CCNE1,MAPK14,MSH2,REV1,CIRBP,KLF5,CDKN1A,ACAT1,SHMT1,BRCA2,FEN1,PPIL1                                                                                                                                                                                                                                                                                |
| E2F3A    | Infectious Diseases                        | 6.78E-05    | RAF1,RMI1,POLA1,SOX12,mir-148,RAN,SFPQ,KRAS,SLC15A4,CHAF1A,INTS7,RARA,VAMP3,IRS2, PYCRL,TYMS,TP53,TIPIN,SLC2A1,UPF3B,RRM2,TFAP4,SPG7,UBQLN4,AP1S1,LCE3C, SHCBP1,GAB1,SUPT16H,ZYX,TFRC,CCDC51,LRIF1,DEK,CDK4,FKBP1A,USP39,TRADD,NECAB3,NEIL3,MAP4,RAB33B,DGCR8,TLR7, TOP2A,KHSRP,PCBP 2,RAD21,DHX9,mir-199,NUP85,HNRNPU,SUZ12,KHDRBS1,PPP1R8,DROSHA,ACTB,POLR1E,POLG,NXF1,FADD,MND1,KPNB1,FTL,MSH2,POLA2,SPCS3,EEF1A1,SRSF2,FAM7 6B,CAV2,KXD1,LIMK2,TUBB,PBK,MYC,SRSF1,RPS20,EZH2,RAB11FIP1,XPO1,MID11P1,SNU13,BCRA1,NUP155,RPL3,GABPB2,DDOST,PSMC4,RANBP1,SS RP1,MED14,WWP2,PFKM,DUSP1,TUBE1,USE1,MBTPS1,CASP2,TMPO,CDK2,TAGLN2,RPSA,ARID1A,NUDT3,GTF2I,NUP50,PTGES3,POLR2A,DNAJB1,RAS SF1,SLC20A1,DLGAP4,NOP56,RNF26,TUBG1,let-7,GPT,GABBR1,PSMA1,G3BP1,NFKBIZ,UMPS,C1orf174,PRKCI,MAPK14,CAD,ACTL6B,RAB6A, LGALS1 |
| E2F3A    | Connective Tissue Disorders                | 7.79E-05    | SRSF2,EEF1A1,RAF1,MELK,KRAS,RBL1,STMN1,MYC,SIVA1, PTRH2,EIF3B,PIM1,RARA,ABCC1,MYBL2,BCRA1, DNMT1,TP53,P4HB,YWHAZ,BIRC6,ITPR1,G SN,SKP2,ARRB2,TFAM,GAB1,DUSP1,XRCC6,MBTPS1,CASP2,USE1,MBD4,E2F1,PIDD1, SNAI2,ARID1A,GADD45B,CDK4,BOK,CHEK1,TRADD,MAP4, TOP2A, NSMCE1,MAP2K7,KHDRBS1,ACTB,GABBR1,NFATC4,BIRC5,CDK1,TPP2,NBN,FADD, SENP1,CCNE1,MAPK14,MSH2,CDKN1A,BCRA2,CASP8AP2                                                                                                                                                                                                                                                                                                                                                                                                                                       |
| E2F3A    | Cellular Response to Therapeutics          | 1.09E-04    | TP53,MCM8,PPIF,RAD54L,KRAS,Abcb1b,NBN,RAD51,RAD54B,PCNA,MXD3,MSH2,ABCC1,XRCC6,CDKN1A,BCRA2,FEN1,MYBL2,BCRA1,MCM9,Paxip1,POL H                                                                                                                                                                                                                                                                                                                                                                                                                                                                                                                                                                                                                                                                                       |
| E2F3A    | Nucleic Acid Metabolism                    | 1.20E-04    | TYMS,ADSS,DUT,DCK,RRM2,SHMT1,DTYMK,UMPS,RRM1                                                                                                                                                                                                                                                                                                                                                                                                                                                                                                                                                                                                                                                                                                                                                                        |
| E2F3A    | Small Molecule Biochemistry                | 1.20E-04    | TYMS,ADSS,DUT,DCK,RRM2,SHMT1,DTYMK,UMPS,RRM1                                                                                                                                                                                                                                                                                                                                                                                                                                                                                                                                                                                                                                                                                                                                                                        |
| E2F3A    | Tissue Development                         | 1.73E-04    | RAF1,MCM8,PFN1,KRAS,RPGRIP1L,PHACTR4,RBL1,LMNB1,MYC,STAG1,EZH2,RARA,MYBL2,FOSL2,BCRA1,DLC1,TP53,WEE1,SKP2,Cdc42,DUSP1,CCNF, E2F1,CDK2,CTC1,ARID1A,PA2G4,RAB23,CDK4,RNASEH2B,SP2,ZMIZ1,PTGES3,GMNN,TCOF1,MCM10,MCM9,PTK7,UHRF1,HAT1,SEC24B,ACTB,CDC6,MT HFD1,BIRC5,ID3,NCAPG2,PPM1G,ARID3A,NBN,FADD,CCNE1,MTHFD1L,MAPK14,CIRBP,CDKN1A,SHMT1,BCRA2,FEN1                                                                                                                                                                                                                                                                                                                                                                                                                                                               |
| E2F3A    | Organismal Development                     | 1.73E-04    | RAF1,RMI1,UBR2,mir-148,RAN,CDC7,KRAS,PHACTR4,RBL1,CHAF1A,RCL1,MXD3,RARA,ABCC1,TARDBP,IRS2, DNMT1,TP53, TOPBP1,CRKL,MAFF,ATE1,CCNF,APH1A,E2F1,TFR C,MAPK7,CTC1,CDK4,ACVR2B,H2AFZ,SP2,CHEK1,NEIL3,TKNS,TCOF1,MCM10,PCBP2,PTK7,mir-199,SEC24B,ING5,ID3,COPS3,NCAPG2,CDK1,MTHFD1L,CCNE1,CDKN1A,SHMT1,FBXO5,FEN1,PLEKHA1,NCAM1,PRPF19,PFN1,MAP1B,RPGRIP1L,LMNB1, MYC,EZH2,MID11P1,MYBL2,BCRA1,FOSL2,DLC1,CDC25A,ESCO2,OSBPL1A,BIRC6,PSMC4,RANBP1,GSN,Abcb1b,SRSF3,Cdc42,TIMELESS,CASP2,Paxip1,T EAD4,ARID1A,Pcnt,RAB23,E2F3,RAD51,ROR2,Ppp1cc,GMNN,ARSB,LRRC8A,E2F8,SLC25A25,POMT2,UHRF1,TUBG1,GABBR1,ERBB3,SNX27,USP1,MTHFD 1,NBN,MAPK14,KLF5,DCTN1,BCRA2,SMARCC1,LGALS1                                                                                                                                                |

## Supplemental Table 7. General IPA functions for E2F1, E2F3A and E2F3B promoter targets

| ChIP-seq | Category                                             | B-H p-value | Genes                                                                                                                                                                                                                                                                                                                                                                                                                                                                                                                                                          |
|----------|------------------------------------------------------|-------------|----------------------------------------------------------------------------------------------------------------------------------------------------------------------------------------------------------------------------------------------------------------------------------------------------------------------------------------------------------------------------------------------------------------------------------------------------------------------------------------------------------------------------------------------------------------|
| E2F3A    | Tissue Morphology                                    | 1.89E-04    | NDST3,PFN1,MYH9,LAMTOR2,UBR2,MMP16,SOX12,KRAS,RPGRIP1L,PHACTR4,RBL1,MYC,PTRH2,EZH2,RARA,MYBL2,BRCA1,DLC1,CDC25A,TP53,ANGP TL6,BIRC6,MEOX1,Cdc42,ARRB2,GAB1,CCNF,APH1A,TFRC,NAGLU,MAPK7,Paxip1,ZFAT,ARID1A,RAB23,ACVR2B,H2AFZ,ZMIZ1,RAD51,ROR2,GMNN,TCO F1,MCM10,E2F8,PTK7,DHX9,SLC20A1,POMT2,UHRF1,SUZ12,TRA2B,SEC24B,HAT1,PPP1R8,ERBB3,NFATC4,MTHFD1,COPS3,ARID3A,NBN,SENP1,MTHF D1L,CCNE1,PRKCI,MAPK14,KLF5,SHMT1,FBXO5,BRCA2,SMARCC1                                                                                                                        |
| E2F3A    | Hereditary Disorder                                  | 2.11E-04    | TP53,MYH9,BARD1,CDK4,FKBP1A,NBN,RAD51,PCNA,CCNE1,MSH2,MUTYH,ABCC1,E2F1,MSH6,BRCA2,BRCA1,BRIP1,RAD51C                                                                                                                                                                                                                                                                                                                                                                                                                                                           |
| E2F3A    | Respiratory Disease                                  | 2.21E-04    | RAF1,EEF1A1,CCP110,PRPF19,MYH9,MTNR1A,PRELID3B,MMP16,KCNJ16,KRAS,EIF4A2,MKI67,RBL1,TUBB,RPS11,SMC1A,STMN1,MYC,SRSF1,STAG1,EZ H2,RARA,MLLT3,BRCA1,DNMT1,TYMS,TP53,PABPC1,SMC3,P4HB,GRM8,TMTC4,RRM2,YWHAZ,TFAP4,ITPR1,GSN,CDCA2,AP5Z1,SKP2,PFKM,ARRB2,PC NA,TFAM,RFC4,TUBE1,MBTPS1,E2F1,ZYX,ARID1A,GADD45B,PKM,CDK4,MAP4,POLR2A,MMP8,DGCR8,TP53,CDCA5,RAD21,RASSF1,DHX9,DCK,DROSH A,CDC6,TUBG1,let-7,GABBR1,TPK1,ERBB3,PPP4R3A,G3BP1,SLC29A1,BIRC5,CDK1,NBN,RRM1,FADD,FTL,MAPK14,PRKCI,MCM2,CTNBL1,MSH2,MUTYH,KLF5,CDKN1A,MS H6,BRCA2,DNPH1,ZFP36L2,NCAM1,LGALS1 |
| E2F3A    | Molecular Transport                                  | 8.61E-04    | NUP155,KHDRBS1,HNRNPA2B1,RAN,XPOT,Hnrnpa3,NXF1,SLBP,SRSF3,KPNB1,DDX39B,SRSF7,XPO1,NUTF2                                                                                                                                                                                                                                                                                                                                                                                                                                                                        |
| E2F3A    | RNA Trafficking                                      | 8.61E-04    | SRSF3,NUP155,KHDRBS1,DDX39B,SRSF7,HNRNPA2B1,RAN,XPO1,XPOT,Hnrnpa3,NXF1,SLBP                                                                                                                                                                                                                                                                                                                                                                                                                                                                                    |
| E2F3A    | Renal and Urological System Development and Function | 1.10E-03    | TP53,STT3B,TEAD4,DLGAP5,CAV2,POLG,SFPQ,KRAS,BIRC5,TPP2,AFF1,SKP2,PMP22,MAPK14,SPDYA,NOP58,KLF5,CDKN1A,E2F1,CDCA5,DLC1,RASSF 1                                                                                                                                                                                                                                                                                                                                                                                                                                  |
| E2F3A    | Cardiovascular Disease                               | 1.50E-03    | RAF1,CTC1,MYH9,CDK4,KRAS,MKI67,TUBB,RICTOR,MYC,TNKS,STAG1,RARA,EZH2,MLLT3,TP53,BRIP1,BRCA1,DLC1,DIS3,DNMT1,RAD21,TP53,SMC3, TUBG1,RRM2,ERBB3,NFKBIZ,IPP,CDK1,AFF1,RRM1,CCNE1,ITPA,MSH2,TUBE1,MUTYH,RECQL4,E2F1,CDKN1A,MSH6,BRCA2,CDK2,FANCA                                                                                                                                                                                                                                                                                                                    |
| E2F3A    | Hair and Skin Development and Function               | 1.53E-03    | RAF1,SNAI2,KLF10,CDK4,FKBP1A,KRAS,MKI67,RBL1,LMNB1,ZMIZ1,STMN1,MYC,TNKS,BRCA1,TP53,VAV2,MECP2,CRKL,ANGPTL6,BIRC6,NFKBIZ,TPP2,A RID3A,ATE1,CCNG2,MAPK14,VAV3,KLF5,E2F1,CDKN1A,NAGLU,TFRC,MAPK7,ZFP36L2,CDK2                                                                                                                                                                                                                                                                                                                                                     |
| E2F3A    | Hepatic System Development and Function              | 1.53E-03    | TP53,CDKN1A,E2F1,E2F8                                                                                                                                                                                                                                                                                                                                                                                                                                                                                                                                          |
| E2F3A    | Tumor Morphology                                     | 1.64E-03    | RAF1,PIM3,SNAI2,KLF10,GDF15,BOK,KRAS,CHEK1,MYC,TRIB1,TRADD,FHL2,EZH2,RARA,TLR7,BRCA1,RASSF1,TP53,CDC6,TFAP4,ITPR1,BIRC5,CDK1,F ADD,MCM2,CASP2,CDKN1A,E2F1,MAPK7,CDK2,LGALS1                                                                                                                                                                                                                                                                                                                                                                                    |
| E2F3A    | Protein Synthesis                                    | 2.35E-03    | HNRNPL,EEF1A1,MYH9,PFN1,CLN8,UBR2,MMP16,TSFM,EIF4A2,ARHGEF1,KRAS,RBL1,MYC,ATG4C,RPS20,UFSP2,EIF3B,EIF3D,PIM1,RARA,XPO1,SIH2, NAA16,Fus,DNMT1,EIF4B,TP53,PABPC1,CNOT1,HCFC1,PJA1,UPF3B,PSMC4,GSN,SKP2,HSPA8,UBE2G2,PTBP1,UBE2D2,Cdc42,RNF168,ARRB2,CASP2,A PH1A,USE1,MBTPS1,ACY1,KIAA0368,NAGLU,CAPN7,RAB23,DPM2,CDK4,FKBP1A,AKIP1,H2AFZ,NECAB3,IPO9,MMP8,RASSF1,DTL,DHX9,STT3B,AZIN1,KH DRBS1,PASK,DROSHA,MRPL12,let-7,HERPUD1,LARP4B,NXF1,PPM1G,TPP2,FADD,SENP1,CDKL2,DDX39B,CIRBP,NUDT16,RPS27L                                                              |

## Supplemental Table 7. General IPA functions for E2F1, E2F3A and E2F3B promoter targets

| ChIP-seq | Category                                              | B-H p-value | Genes                                                                                                                                                                                                                                                                                                                                                                                                                                                                                                                                                                                |
|----------|-------------------------------------------------------|-------------|--------------------------------------------------------------------------------------------------------------------------------------------------------------------------------------------------------------------------------------------------------------------------------------------------------------------------------------------------------------------------------------------------------------------------------------------------------------------------------------------------------------------------------------------------------------------------------------|
| E2F3A    | Skeletal and Muscular System Development and Function | 2.35E-03    | TP53,mir-199,CRKL,CDK4,E2F3,BIRC5,ID3,SKP2,ROR2,MAPK14,PIM1,KLF5,E2F1,ARSB                                                                                                                                                                                                                                                                                                                                                                                                                                                                                                           |
| E2F3A    | Renal and Urological Disease                          | 3.32E-03    | RAF1,ARID1A,PKM,BOK,EIF4A2,MELK,KRAS,SMC1A,STMN1,MYC,RAD51,YWHAQ,TRIM27,EZH2,ABCC1, TOP2A,PLCB1,BRCA1,RAD21,RASSF1,TP53,SMC3,MAP2K7,ERBB3,ITPR1,GSN,SSRP1,BIRC5,BAG4,CDK1,FADD,Cdc42,PMP22,MAPK14,DUSP1,CASP2,KLF5,TMX1,CDKN1A,TFRC,BRCA2,MSH5,CDK2                                                                                                                                                                                                                                                                                                                                  |
| E2F3A    | Post-Translational Modification                       | 4.13E-03    | PRPF19,MED23,UBR2,RFWD3,FKBP1A,RNF38,TNKS,SIAH2,BRCA1,PCBP2,ANAPC11,NSMCE1,APITD1/APITD1-CORT,RASSF1,DTL,MED18,UHRF1,BIRC6,PSMC4,HERPUD1,GAN,TPP2,SKP2,WWP2,SASH1,UBE2D2,RNF168,ARRB2,CCNF,PHF23,LTN1,Paxip1,TRIM59                                                                                                                                                                                                                                                                                                                                                                  |
| E2F3A    | Reproductive System Development and Function          | 4.31E-03    | TP53,TRIP13,MCM8,Ppp1cc,UBR2,MSH5,BRCA2,BRCA1,RAD51C,CDK2,FANCA                                                                                                                                                                                                                                                                                                                                                                                                                                                                                                                      |
| E2F3A    | Cardiovascular System Development and Function        | 4.31E-03    | mir-199,E2F1,CDK4,E2F3,BIRC5,SKP2                                                                                                                                                                                                                                                                                                                                                                                                                                                                                                                                                    |
| E2F3A    | RNA Damage and Repair                                 | 4.35E-03    | PPP1R8,DXO,NUDT16,let-7,RNASEH2B,RBFOX2,ZFP36L2,KHSRP,DIS3                                                                                                                                                                                                                                                                                                                                                                                                                                                                                                                           |
| E2F3A    | Organ Development                                     | 4.65E-03    | SNAI2,KLF10,CDK4,KRAS,MKI67,RBL1,LMNB1,MYC,STMN1,BRCA1,VAV2,TP53,MECP2,ANGPTL6,NFKBIZ,ID3,TPP2,SKP2,CCNG2,MAPK14,VAV3,CDKN1A,E2F1,KLF5,NAGLU,CDK2                                                                                                                                                                                                                                                                                                                                                                                                                                    |
| E2F3A    | Neurological Disease                                  | 4.75E-03    | HNRNPL,RAF1,POLA1,KRAS,MKI67,RAPH1,ACIN1,RNF38,RARA,ABCC1,TARDBP,PLCB1,IRS2,TYMS,PABPC1,TP53,OTUD4,CSR2,RRM2,PLEC,YWHAZ,HSPA8,E2F1,ACY1,MAPK7,FRG1,TRAPPC5,SNAI2,HNRNPA2B1,GDF15,CDK4,FKBP1A,HMGB2,H2AFZ,TMEM209,MAP4, TOP2A,PCBP2,RAD21,PTK7,MECP2, ID3,CDK1,RRM1,FADD,MSH2,CDKN1A,MAZ,SAAL1,NCAM1,CCDC15,MAP1B,NUP58,LIMK2,ZNF91,TUBB,SMC1A,YWHAQ,USF3,MYC,PIM1,EZH2,MLLT3,RYR3,MYBL2,BRCA1,CDC25A,SMC3,GSN,DUSP1,TUBE1,CASP2,CDK2,ARID1A,FEM1A,PA2G4,KIAA0101,DENND4B,PKM,E2F3,LYST,TCP1,RASSF1,UHRF1,CHERP,TUBG1,GPT,FCHSD2,NFATC4,BIRC5,NBN,MAPK14,FAM111A,VAV3,EHD4,MSH6,BRCA2 |
| E2F3A    | Endocrine System Disorders                            | 5.54E-03    | EIF4A2,KRAS,DDX20,MKI67,TUBB,SMC1A,MYC,RYR3,MTHFD2,BRCA1,BRIP1,NFXL1,TYMS,TP53,OTUD4,SMC3,SMIM8,RRM2,SSRP1,SH3GL1,PTBP1,TUBE1,H2AFX,CASP2,E2F1,HAUS6,CDK2,ARID1A,KIAA0101,BARD1,GDF15,PKM,RNASEH2B,CDK4,NUP50,CAMK2N2,E2F3,CHEK1,TRA2A,RABL6,PCK2, TOP2A, VARS,RAD21,E2F8,CEP152,mir-199,TUBG1,ERBB3,BIRC5,CDK1,NBN,RRM1,RAD54B,PRKCI,MSH2,VAV3,CDKN1A,MSH6,BRCA2,CAD,FOXN2,NCAM1                                                                                                                                                                                                    |
| E2F3A    | Protein Trafficking                                   | 6.29E-03    | KPNB1,RAN,NUTF2                                                                                                                                                                                                                                                                                                                                                                                                                                                                                                                                                                      |
| E2F3A    | Hepatic System Disease                                | 7.34E-03    | SLC20A1,TP53,TYMS,PABPC1,RAF1,TACC3,ARID1A,PKM,RRM2,CDK4,ERBB3,WWC2,KRAS,BIRC5,MAFF,RRM1,AKAP11,ARID3A,CCNE1,ACY1, TOP2A, BRCA2,BRCA1,CDK2                                                                                                                                                                                                                                                                                                                                                                                                                                           |



## Supplemental Table 7. General IPA functions for E2F1, E2F3A and E2F3B promoter targets

| ChIP-seq | Category   | B-H p-value | Genes                                                                                                                                                                                                                                                                                                                                                                                                                                                                                                                                                                                                                                                                                                                                                                                                                                                                                                                                                                                                                                                                                                                                                                                                                                                                                                                                                                                                                                                                                                                                                                                                                                                                                                                                                                                                                                                                                                                                                                                                                                                                                                                                                                                                                                                                                                                                                                                                                                                                                                                                                                                                                                                                                                                                                                                                                                                                                                                                                                                                                                                                                                                                                                                                                                                                                                                                                                                                                                                                                                                                                                                                                                                                                                                                                                                                                                                                                                                                                                                                                                                                                                                                                                                                                                                                                                                                                                                                                                                                                                     |
|----------|------------|-------------|-----------------------------------------------------------------------------------------------------------------------------------------------------------------------------------------------------------------------------------------------------------------------------------------------------------------------------------------------------------------------------------------------------------------------------------------------------------------------------------------------------------------------------------------------------------------------------------------------------------------------------------------------------------------------------------------------------------------------------------------------------------------------------------------------------------------------------------------------------------------------------------------------------------------------------------------------------------------------------------------------------------------------------------------------------------------------------------------------------------------------------------------------------------------------------------------------------------------------------------------------------------------------------------------------------------------------------------------------------------------------------------------------------------------------------------------------------------------------------------------------------------------------------------------------------------------------------------------------------------------------------------------------------------------------------------------------------------------------------------------------------------------------------------------------------------------------------------------------------------------------------------------------------------------------------------------------------------------------------------------------------------------------------------------------------------------------------------------------------------------------------------------------------------------------------------------------------------------------------------------------------------------------------------------------------------------------------------------------------------------------------------------------------------------------------------------------------------------------------------------------------------------------------------------------------------------------------------------------------------------------------------------------------------------------------------------------------------------------------------------------------------------------------------------------------------------------------------------------------------------------------------------------------------------------------------------------------------------------------------------------------------------------------------------------------------------------------------------------------------------------------------------------------------------------------------------------------------------------------------------------------------------------------------------------------------------------------------------------------------------------------------------------------------------------------------------------------------------------------------------------------------------------------------------------------------------------------------------------------------------------------------------------------------------------------------------------------------------------------------------------------------------------------------------------------------------------------------------------------------------------------------------------------------------------------------------------------------------------------------------------------------------------------------------------------------------------------------------------------------------------------------------------------------------------------------------------------------------------------------------------------------------------------------------------------------------------------------------------------------------------------------------------------------------------------------------------------------------------------------------------------------|
| E2F3B    | Cell Cycle | 1.96E-44    | <p>mir-130,NPM1,TIMM13,TGFBR1,CTCF,PRKAB1,POLA1,CCNB2,SMARCD2,SSBP2,FRMD6,GPSM2,TRIM32,Ewsr1,GORASP2,PRKCDBP,SMARCB1,TCERG1,MOB1A,AHCY,CENPW,ETS1,HCFC1,CCNE2,NPAT,RFC1,TMEM67,TCF3,ZBTB5,MASTL,DAXX,KAT6A,RAD18,PRKACA,ECT2,FANCA,MORC3,KIF20A,PIM3,NRG2,Calm1 (includes others),DDIT3,PRDX1,TTK,CDK10,SYNM,RABL6,NOTCH2,PELO,EXO1,EP400,KHDRBS1,GAS1,MAPK6,KAT5,ID3,BAK1,MCM3,BUB1,KPNB1,MAD2L1,ARPP19,MSH2,CSF1,FBXO5,ACTL6A,KIF23,CDKN2A,SOCS3,YWHAH,SEPT9,SMAD3,RNF7,RGPD4 (includes others),SMC1A,SOX2,INTS3,USP8,E2F6,CEP57,MAPK3,JUND,ZWINT,GPX4,ING2,ESCO2,HDAC2,WEE1,DNA2,MAPKAPK5,RAD54L,NDC1,CDCA2,DYNC1H1,BCL2L1,H3F3A/H3F3B,SF3B4,CEP76,UBE2I,PBRM1,PEBP1,RMI2,KIAA0101,SKA2,BARD1,PIAS1,NEDD1,RNASEH2B,ZNF219,EIF2S1,E2F3,PTGES3,LSM2,STUB1,ILKAP,ERBB2,PDK1,VAV2,TACC3,RACGAP1,SMARCE1,PSMC3IP,SMARCD1,SOD1,TSN,SERTAD1,BIRC5,MORF4L1,PPM1G,CENPI,E2F7,KLF5,TFCP2,CKS1B,BRCA2,TSC22D1,BORA,ING1,TUBA1B,DDX11,CCP110,MTBP,DSTN,SUV39H1,RAN,HBP1,MKI67,RBL1,EIF6,ARNT,XRCC1,POLB,CD2AP,RASGRF1,RARA,TDP2,CCNT2,FRS2,DNMT1,PABPC1,TFDP1,CENPB,HIRA,SEPT7,MDC1,HBEGF,CKAP2,MTF2,GRK5,HMGA1,Anp32b,MNT,RERE,CDAN1,CREM,ME2,SAC3D1,SGOL1,HAUS6,FYN,NCAPD3,CDT1,PLAGL1,CUL1,PTN,FKBP1A,HMGB2,CNTROB,SF3B3,XRCC4,EIF4EBP1,KAT2B,RINT1,CREB1,DIS3L2,RFC2,IGF1R,CEP152,PMS2,PPIF,BANP,POLE,SPC25,SUPT4H1,TIAL1,SMC6,PLK1,MDM2,ACLY,SCMH1,CDK1,NCAPG2,RRM1,SPIDR,REV1,CIRBP,MUM1,CAMKK1,UBN1,CAP1,BABAM1,PRPF19,ARF1,VPRBP,ATRIP,FBXW7,DICER1,METAP2,YWHAQ,GSPT1,CAMK2D,STAG1,PPP1R7,NCAPH,FASN,SNU13,TFDP2,FOSL2,SOX4,STIL,CLTC,BIRC6,RAC1,CCDC155,CDC123,SMARCD3,HERC2,PALB2,Cdc42,NASP,SMC2,RHOA,SH2B3,SCRIB,NUAK1,SPTAN1,CYLD,CDK2,CDK5RAP2,ZBTB49,CCNC,PA2G4,GADD45G,CENPC,DTYMK,NGF,WDHD1,RAD9B,UHRF2,TRIM24,POLR2A,PPP1R12A,HAUS5,GMNN,SIPA1,GTPBP4,MAPKAPK2,IPO5,RPAIN,RASSF1,UBR5,UHRF1,SNRPB,HAT1,PHF13,NCAPH2,PRMT1,HMG20B,RPS27L,MIS12,CENPH,CASP8AP2,MSN,RAF1,RMI1,RNF8,MYH9,PRKAB2,SMC5,HAUS4,RBM3,KRAS,CCND1,C6orf89,PKN2,BOP1,FHL2,KIF13A,CENPE,NEK6,ADORA2B,RUVBL2,KLF1,CDC16,HIPK2,IQGAP3,TYMS,TP53,ATG5,PHIP,ESPL1,YAP1,EEF2,CSNK1D,PTP4A1,SKP2,ATF2,HSPA8,ATE1,DYNC1LI2,CCNF,SUPT16H,BTG2,GTSE1,TFRC,INVS,CENPT,CHD1L,PTPRA,XRCC5,INF2,FANCM,DEK,TRIM33,AKAP8,PTPN2,CDK4,PDS5B,CEBPD,PRPF4,PSEN2,SEPT11,NUF2,MMS22L,SPAG5,CDKN3,MAP4,ARF6,DAB2,DDX28,CSNK2B,KIF2C,NFE2L2,CDC5L,ESCO1,RAD21,DHX9,TUBGCP6,CUL7,LZTS2,HNRNPD,ING5,VDAC3,NCAPD2,IGHMBP2,CCNE1,NR4A2,CDKN1A,PSAP,SPICE1,RAD51AP1,ID4,TCF7L2,PSEN1,DLGAP5,SRSF2,MSH3,KLF6,GNB2L1,PARP2,RFWD3,SMC4,KNTC1,SART1,TCEB1,SKA1,CRLF3,CEBPG,TGFBR2,ZW10,MYC,LEMD3,MAP2K2,RCC1,PIM1,FIGNL1,XPO1,MYBL2,SUGT1,CEP131,TAB1,SNRPA1,NUCKS1,CLASP1,TOP3B,SMC3,YWHAH,KANK2,MYO19,PNN,ORC6,HELLS,BUB1B,KMT2A,ERCC6L,PPP2CB,CBX1,TAF1,PIAS4,TRIM39,DUSP1,RECQL4,XRCC6,PKMYT1,DIXDC1,NDC80,MAD1L1,CAPN2,KLHL21,ACTN4,SUV420H1,RBBP4,RUNX1,ARID1A,ETF2,RPS6KA3,WDR6,ETV6,VPS4A,MLH1,RAD50,RAD51,CCNA2,DIAPH1,CSR2BP,AHNAK,FANCD2,SPDL1,TIMP1,BMPR1A,NET1,FOXO3,SNRPD2,CIZ1,RPS3,MCM9,LRWD1,PRKCA,HAUS8,TUBG1,RPL23,FOXM1,GIT1,RPA2,NBN,IVNS1ABP,PRKCI,MAPK14,FOXO1,KIF5B,RAD9A,MSH6,DCTN1,ATR,CDC34,WNK1,DPY30,KIF18A,CENPF,SOCS1,ITSN1,SGK1,DNAJB4,CDC7,CDKN2C,SFPQ,HES1,PHACTR4,KPNA1,Rpl29 (includes others),CHAF1A,RECQL,CXCL10,VEGFA,INTS7,MXD3,TARDBP,MAP1S,IRS2,TXN,CEP250,ANAPC11,LSM4,TIMP2,CENPJ,STAT6,CDK13,TIPIN,NDRG1,CFL1,TOPBP1,MITF,COPS5,PTCH1,TFAP4,RPA1,UBE2S,FANCC,IRF1,TERF2,CCNO,PCNA,NSMCE2,PATZ1,INO80,GAB1,PPP2R3A,BHLHE40,H2AFX,IRS1,E2F1,MBD4,CHKA,AHCTF1,RGL2,MSH5,RAB11A,CLSPN,MAPK7,HELB,CYR61,YEATS4,VASH2,CTC1,PKD2,HMGN1,NUP214,RCHY1,FNTB,CAMK2N2,SASS6,VCAN,EP300,CHEK1,ID1,YY1,HUS1,DAP3,PDGFRA,E2F5,RHOU,TOP2A,CEBPA,PRKCE,BID,MAP1LC3B,MCM10,MCPH1,HEXIM1,RASSF5,POT1,ZWILCH,MYCN,VPS18,mir-199,DCK,TBX3,CDC6,RAD51B,POLD1,PPP2R5A,KITLG,FADD,DGKZ,KIF15,SF3B2,NUP153,SPDYA,MCM2,PDXP,NDE1,KIF20B,SPRY2,PRMT5,TBPL1,FEN1,NCOR2,MAFB,ZFP36L2,PAFAH1B1,HINFP,SEPT2,DYRK1A,SMARCD1,POLH,RPL11,FZR1,MCM8,EP315,MAPK1,DIAPH3,MELK,TAF10,MEPCE,TUBB,AURKB,LATS2,LMNB1,PTK2,STMN1,ROCK2,SRSF1,EZH2,ITGAV,DARS,HTRA2,BRCA1,RAD51C,CDC25A,KIF14,Ftx,CDC37,GPS2,FGFR1,STK11,LMNA,RANBP1,TMOD3,SSRP1,SRSF3,CCNT1,TOB2,RNF4,CCNG2,PKD1,TUBE1,CASP2,LIN9,GNL3,BAZ1B,MTDH,PML,TMPO,Paxip1,KIF11,RFC3,INCENP,PRIMPOL,GDNF,MEIS2,ABL1,Spg20,RBBP8,Ttf1,TAOK1,ING4,BCAR1,Tpm2,MCM4,TNFRSF12A,SP1,PMF1/PMF1-BGLAP,CIT,TCP1,ERF,BLM,E2F8,DTL,MAP2K7,CKS2,ATG10,COPS7A,HDAC1,let-7,SMAD7,PRKAR2A,MAPK9,BCL3,ING3,USP1,XIAP,GNAI2,DNM1,UBQLN2,RIPK1,B4GALT1,SATB1,TONSL,EIF2AK2,SMARCC1,UBC,BCL2L11,GSB2,LGALS1,MCM7</p> |

## Supplemental Table 7. General IPA functions for E2F1, E2F3A and E2F3B promoter targets

| ChIP-seq | Category        | B-H p-value | Genes                                                                                                                                                                                                                                                                                                                                                                                                                                                                                                                                                                                                                                                                                                                                                                                                                                                                                                                                                                                                                                                                                                                                                                                                                                                                                                                                                                                                                                                                                                                                                                                                                                                                                                                                                                                                                                                                                                                                                                                                                                                                                                                                                                                                                                                                                                                                                                                                                                                                                                                                                                                                                                                                                                                                                                                                                                                                                                                                                                                                                                                                                                                                                                                                                                                                                                                                                                                                                                                                                                                                                                                                                                                                                                                                                                                                                                                                                                                                                                                                                                                                                                                                                                                                                                                                                                                                                                                                                                                                                                                                                                                                                                                                                                                                                                                                                                                                                                                                                                                                                                                                                                                                                                                                                                                                                                                                                                                                                                                                                                                                                                                                                                                                                                                                                  |
|----------|-----------------|-------------|--------------------------------------------------------------------------------------------------------------------------------------------------------------------------------------------------------------------------------------------------------------------------------------------------------------------------------------------------------------------------------------------------------------------------------------------------------------------------------------------------------------------------------------------------------------------------------------------------------------------------------------------------------------------------------------------------------------------------------------------------------------------------------------------------------------------------------------------------------------------------------------------------------------------------------------------------------------------------------------------------------------------------------------------------------------------------------------------------------------------------------------------------------------------------------------------------------------------------------------------------------------------------------------------------------------------------------------------------------------------------------------------------------------------------------------------------------------------------------------------------------------------------------------------------------------------------------------------------------------------------------------------------------------------------------------------------------------------------------------------------------------------------------------------------------------------------------------------------------------------------------------------------------------------------------------------------------------------------------------------------------------------------------------------------------------------------------------------------------------------------------------------------------------------------------------------------------------------------------------------------------------------------------------------------------------------------------------------------------------------------------------------------------------------------------------------------------------------------------------------------------------------------------------------------------------------------------------------------------------------------------------------------------------------------------------------------------------------------------------------------------------------------------------------------------------------------------------------------------------------------------------------------------------------------------------------------------------------------------------------------------------------------------------------------------------------------------------------------------------------------------------------------------------------------------------------------------------------------------------------------------------------------------------------------------------------------------------------------------------------------------------------------------------------------------------------------------------------------------------------------------------------------------------------------------------------------------------------------------------------------------------------------------------------------------------------------------------------------------------------------------------------------------------------------------------------------------------------------------------------------------------------------------------------------------------------------------------------------------------------------------------------------------------------------------------------------------------------------------------------------------------------------------------------------------------------------------------------------------------------------------------------------------------------------------------------------------------------------------------------------------------------------------------------------------------------------------------------------------------------------------------------------------------------------------------------------------------------------------------------------------------------------------------------------------------------------------------------------------------------------------------------------------------------------------------------------------------------------------------------------------------------------------------------------------------------------------------------------------------------------------------------------------------------------------------------------------------------------------------------------------------------------------------------------------------------------------------------------------------------------------------------------------------------------------------------------------------------------------------------------------------------------------------------------------------------------------------------------------------------------------------------------------------------------------------------------------------------------------------------------------------------------------------------------------------------------------------------------------------------------------|
| E2F3B    | Gene Expression | 1.70E-41    | TGFBF1, TLE1, POR, SMARCB1, ADA, SART3, ETS1, RANBP3, RFC1, ZBTB5, DVL2, DDIT3, BEND6, PRDX4, PPIA, NOTCH2, TIPARP, IBTK, ATN1, LSM14B, ID3, NR1D2, PIR, CDKN2A, SMAD3, CBX5, E2F6, MAPK3, MATR3, JUN, ING2, Hmgn2 (includes others), MAPKAPK5, RAD54L, PHRF1, H3F3A/H3F3B, POLR2E, CBX3, TFEB, KLF10, PIAS1, RNASEH2B, PDCD10, EIF2S1, HDGF, TARBP1, SIX1, LARP7, MEF2A, SOD1, BRD3, HTATSF1, TFCP2, E2F7, TSC22D1, ING1, BRPF1, MAP4K4, CTGF, UBR2, ZNF628, ADIPOR1, RASGRF1, CTDSP1, TDP2, CBFB, CCNT2, UAP1, HIPK1, DNMT1, SPTY2D1, TFDP1, HIRA, ZC3HAV1, SYNCRIP, HBEGF, HMGA1, SPOP, ARHGAP35, SNAI2, MamI1, PLAGL1, CUL1, POLR2J, FKBP1A, CCAR2, FZD1, H2AFZ, MAFG, GTF2A2, RNPS1, IGF1R, PPM1F, RPS5, EED, BANP, SUPT4H1, PLK1, SENP1, RNF187, TRERF1, NCAM1, METAP1, FBXW7, ZNF91, YWHAQ, ETS2, MID1IP1, TFDP2, PUS1, SMARCD3, WHSC1L1, CDK5RAP2, ZBTB49, NGF, ZMIZ1, NELFE, ZFP90, HINT1, TRIM24, POLR2A, USP47, RPAIN, ATP2C1, TCF7L1, MLLT1, TSHZ3, ZNF382, FA1, RPS27L, RAF1, RNF8, NKAP, KLF7, GATAD2A, Diap2, MPHOSPH8, FBLN1, TGIF2, KLF1, CBX8, PHIP, PAM, YAP1, APPL2, CDCA4, ZNF496, PLEKHG2, PEX2, ATXN7L3, MRPL17, Meis1, RBM39, DEK, WDR61, HNRNPA2B1, CEBPD, CTDSPL, DUSP22, MED28, LRRFIP1, SLC31A2, NAA15, IRF2BPL, SOS1, DAB2, ASPH, NFE2L2, CDC5L, RAD21, DHX9, SERTAD2, HNRNPU, KLHDC2, MED20, ING5, IGHMBP2, CCNE1, ZFPM2, GPBP1, CAPRIN2, CDKN1A, EIF2B1, UBTF, MAP3K3, ID4, TCF7L2, PSEN1, CAMK1D, NME2, NFATC2IP, ATXN1L, CRLF3, CEBPG, TGFBF2, MYC, Gm21596/Hmgb1, PPP3R1, XPO1, Hmga2, WDR77, KLF11, EIF4B, SMC3, FSTL3, YWHAQ, KANK2, GABPB2, HELLS, RBFOX2, TBL1X, TAF1, HNRNPAB, GMEB2, ETV4, XRCC6, MAD1L1, FZD5, H1F0, ACTN4, Rpl1 (includes others), COMMD7, UBE2N, RPS6KA3, IGF2BP1, ETV6, CCNA2, DIAPH1, BMPR1A, TIMP1, Zfp68, RPS3, ACO1, LRWD1, PRKCA, SLC20A1, TAF12, RFX1, RPL23, SS18L1, PRKCI, MAPK14, FOXO1, PHF19, RAD9A, SNAPC2, TEAD3, SGK1, SOX12, CDKN2C, SFPQ, RICTOR, Rpl29 (includes others), VEGFA, CXCL10, NCOA7, ZNF367, IPMK, MTF1, PCID2, HEY2, MITF, RPA1, IRF1, TERF2, PCNA, INO80, PATZ1, PSMB2, BHLHE40, E2F1, LRP8, HELB, SCAP, PKD2, SP2, SGMS1, EP300, WTAP, TGFBFAP1, DHPS, NCOA2, PRRX1, E2F5, DAP3, PRKCE, DLX1, MAFK, NELFA, SIN3A, PVT1, PRMT5, GABPA, NCOR2, ZFP36L2, ASH2L, FNIP2, MELK, LOC102724828/MRPL23, PTK2, EZH2, DARS, NIPBL, SIAH2, CIPC, GPS2, FGFR1, LMNA, ELF1, ARRB2, FLOT2, LCORL, NFYC, MAP4K5, PML, MTDH, TMPO, BCL9L, CNBP, PRIMPOL, TEAD4, DRAP1, GABPB1, PKNOX1, ZBTB7A, MED23, PDGFA, GTF2F2, MEIS2, ING4, SP1, PMF1/PMF1-BGLAP, ATF6B, RBM15, PHF21A, NFYB, MAP2K7, Nedd4, Iet-7, SMAD7, BCL3, RPS6KA5, ENO1, TONSL, SMARCC1, MCM7, WNT5A, LGALS1, mir-130, NPM1, CTCF, PRKAB1, POLA1, TAB2, SSBP2, EIF3B, TCERG1, HCFC1, CD3EAP, NPAT, TCF3, SP4, DAXX, POLR3H, KAT6A, PRKACA, ECT2, CPE, EIF4EBP2, PRDX1, CEBPZ, HEXB, ZNF398, KHDRBS1, GREM1, KAT5, BAK1, MSH2, CSF1, MAZ, TFB1M, SOCS3, LHX2, YWHAH, SFMBT1, CCT2, HDAC10, ZFPM1, ECD, SOX2, OSBP1, POLR1B, HDAC2, IFT74, RDX, POLR2H, PFDN5, EIF4E2, TXNRD1, CAND1, AEBP2, RAI1, UBE2I, FOXP4, TEF, PEBP1, PBRM1, LITAF, ZNF219, ZNF226, INPPL1, E2F3, IQGAP1, PTGES3, NFAT5, STUB1, ZNF24, ERBB2, VAV2, KDM4C, SMARCE1, CSRN1, PSMC3IP, MED26, NFATC4, SERTAD1, BIRC5, SERTAD3, KLF5, BRCA2, F2R, SUV39H1, ZNF76, GTF2E2, HBP1, DDX20, RBL1, ARNT, POLB, RARA, MED16, CNOT1, YWHAZ, MTF2, CKAP2, SCRT1, MED12, PHF12, MNT, AHI1, CREM, HEXIM2, PRICKLE1, C1D, FYN, RREB1, OSR2, STRA13, HMGB2, EIF4G1, MRPL39, EIF4EBP1, KAT2B, CREB1, SUZ12, ELL, TIAL1, MDM2, SLIT2, NAP1L1, CDK1, CCDC85B, H2AFY, UBN1, HOXB9, 2700046G09Rik, NAB2, Klf16, VPRBP, DICER1, CAMK2D, RPL19, ABLIM2, FOSL2, SOX4, MCM5, DTNBP1, RAC1, SIX5, Cdc42, ERP29, TIMELESS, SH2B3, RHOA, PDLIM1, SBNO2, JAG1, CDK2, KDM3A, BRD2, PA2G4, SRRT, GADD45G, TLE2, CGGBP1, Cux1, SET, GTF2B, PPP1R12A, GMNN, SORBS3, NCL, MAPKAPK2, IFRD1, YLPM1, DHX15, RASSF1, UBR5, MYCBP, UHRF1, HSPH1, EDF1, CIART, PIAS3, TFB2M, NFIB, CBFA2T2, PSMC3, LANCL2, MSN, KRAS, RBM3, CCND1, PKN2, EGR2, FHL2, RBM4B, SUMO1, NEK6, ATF4, RUVBL2, HIPK2, TARBP2, IQGAP3, TP53, TBK1, KLF13, RBM4, ATF2, HSPA8, SCAF8, EIF4H, SUPT16H, BTG2, GAPDH, SAMD4A, XRCC5, Zfp568, RAP2A, GCFC2, USF2, PSEN2, WWC2, ALX1, VRK1, APPL1, CD47, ZC3H8, IRF2BP1, TRIM27, JADE1, MRPL12, POLG, TOB1, HNRNPD, NXF1, FRK, Kat6b, NR4A2, MBD3, TCF19, SRSF2, ILF3, GNB2L1, KLF6, SART1, TCEB1, HSPA4, LEMD3, MAP2K2, EIF3D, PIM1, MYBL2, BRIP1, ITGB3BP, TAB1, SBF2, ZNF706, SIK2, ATAD2, KMT2A, PIAS4, CBX1, TFAM, MLXIP, DUSP1, DIXDC1, PCBD2, HELT, ELMO1, RUNX1, ARID1A, VPS72, PPIB, GTF2I, ABCF1, ATF6, SMAD5, GTF2A1, MLH1, MIER1, LDB1, FOXO3, DNAJB1, PRDM6, ENY2, ZNF354A, RRP8, RPRD1B, TUBG1, CHP1, SMAD6, SAP130, FOXM1, ZHX3, NBN, IVNS1ABP, RCAN1, TLE4, CENPF, SOCS1, NR6A1, ABCA2, ITSN1, GTF3C2, HES1, CHAF1A, MXD3, THRAP3, BAG1, TARDBP, ZBTB14, Zfp748, TXN, CREBZF, CENPJ, STAT6, ACTR2, CFL1, FOXH1, TOPBP1, COPS5, PTCH1, TFAP4, PTBP1, GAB1, H2AFX, AHCTF1, GNB2, MRPL41, MAPK7, SLC44A2, CYR61, HIST1H1C, DEPDC1, ATF7, PDIA3, HMG1, SETX, TRIP4, RCHY1, SLBP, ID1, YY1, SEC61A1, CEBPA, TOP2A, BID, TAF3, HEXIM1, RXRB, MYCN, TBX3, PPP1R8, C10orf2, CC2D1B, AGO2, RQCD1, PPP2R5A, YBX2, FADD, EIF3G, KITLG, SLC30A9, LIMS1, SREBF2, SPRY2, NOP2, Rbmxl1, TBPL1, SUPT3H, RBPJ, MAFB, IREB2, HINFP, TAF15, DYRK1A, TFG, MAPK1, MECPCE, TAF10, AURKB, GFR3, ROCK2, ASXL2, RORA, NEO1, UCHL5, PUF60, BRCA1, NONO, STK11, mir-3960, TBP, SSRP1, Scaf1, MED14, WWP2, EPRS, CCNT1, RNF4, PKD1, EIF4A3, TLE3, MRPL3, RPL13A, NFIX, GDNF, PICALM, PKM, RBBP8, ABL1, TNFAIP3, Ttf1, BCLAF1, PRKAG1, TCF12, NFX1, ROR2, GLI3, RRN3, MAML3, BLM, ERF, E2F8, NACA, HDAC1, MAPK9, NFKBIZ, MED6, PSIP1, NDUFA13, XIAP, AFF1, HIVEP2, DNMT1, RIPK1. |

## Supplemental Table 7. General IPA functions for E2F1, E2F3A and E2F3B promoter targets

| ChIP-seq | Category            | B-H p-value | Genes                                                                                                                                                                                                                                                                                                                                                                                                                                                                                                                                                                                                                                                                                                                                                                                                                                                                                                                                                                                                                                                                                                                                                                                                                                                                                                                                                                                                                                                                                                                                                                                                                                                                                                                                                                                                                                                                                                                                                                                                                                                                                                                                                                                                                                                                                                                                                                                                                                                                                                                                                                                                                                                                                                                                                                                                                                                                                                                                                                                                                                                                                                                                                                                                                                                                                                                                                                                                                                                                                                                                                                                                                                                                                                                                                                                                                                                                                                                                                                                                                                                                                                                                                                                                                                                                                                                                                                                                                                                                                                                                                                                                                                                                                                            |
|----------|---------------------|-------------|------------------------------------------------------------------------------------------------------------------------------------------------------------------------------------------------------------------------------------------------------------------------------------------------------------------------------------------------------------------------------------------------------------------------------------------------------------------------------------------------------------------------------------------------------------------------------------------------------------------------------------------------------------------------------------------------------------------------------------------------------------------------------------------------------------------------------------------------------------------------------------------------------------------------------------------------------------------------------------------------------------------------------------------------------------------------------------------------------------------------------------------------------------------------------------------------------------------------------------------------------------------------------------------------------------------------------------------------------------------------------------------------------------------------------------------------------------------------------------------------------------------------------------------------------------------------------------------------------------------------------------------------------------------------------------------------------------------------------------------------------------------------------------------------------------------------------------------------------------------------------------------------------------------------------------------------------------------------------------------------------------------------------------------------------------------------------------------------------------------------------------------------------------------------------------------------------------------------------------------------------------------------------------------------------------------------------------------------------------------------------------------------------------------------------------------------------------------------------------------------------------------------------------------------------------------------------------------------------------------------------------------------------------------------------------------------------------------------------------------------------------------------------------------------------------------------------------------------------------------------------------------------------------------------------------------------------------------------------------------------------------------------------------------------------------------------------------------------------------------------------------------------------------------------------------------------------------------------------------------------------------------------------------------------------------------------------------------------------------------------------------------------------------------------------------------------------------------------------------------------------------------------------------------------------------------------------------------------------------------------------------------------------------------------------------------------------------------------------------------------------------------------------------------------------------------------------------------------------------------------------------------------------------------------------------------------------------------------------------------------------------------------------------------------------------------------------------------------------------------------------------------------------------------------------------------------------------------------------------------------------------------------------------------------------------------------------------------------------------------------------------------------------------------------------------------------------------------------------------------------------------------------------------------------------------------------------------------------------------------------------------------------------------------------------------------------------------------|
| E2F3B    | Organismal Survival | 1.36E-40    | NPM1,CTCF,TGFBF1,PRKAB1,SLC6A9,TAB2,CCNB2,SSBP2,ELAVL4,SECISBP2,POR,PPRC1,PRKCDBP,SMARCB1,ADA,PLXNB2,FBL,ETS1,AFMID,CCNE2,SLC2A1,PIGF,CRKL,TCF3,MASTL,DCLRE1A,SP4,DAXX,DVL2,KAT6A,ITPR3,PRKACA,CELSR3,CPOX,RMRP,ECT2,FLNB,NRG2,PRDX1,BAG6,GNA11,PIIA,NOTCH2,TIPARP,PELO,HEXB,ATN1,EXO1,EP400,KHDRBS1,BBIP1,GAS1,GREM1,KAT5,IGF2R,ID3,BAK1,BUB1,MAD2L1,TMEM107,MSH2,CSF1,FBXO5,TFB1M,AP1G1,ACTL6A,CDKN2A,SOCS3,LHX2,SMAD3,GNPAT,ZFPM1,RPGRIP1L,ECD,INTS1,RGPD4 (includes others),USP8,E2F6,MAPK3,MTMR2,GPX4,ESCO2,STXBP1,HDAC2,DNA2,MAPKAPK5,RAD54L,GNAZ,KCNAB2,EIF4E2,TXNRD1,DYNC1H1,BCL2L1,GINS1,H3F3A/H3F3B,RAI1,FOXP4,UBE2I,TFEB,PIAS1,PVRL3,MCM3AP,BARD1,INPPL1,GPHN,E2F3,EIF2S1,PDCC10,CLIC4,PTGES3,SIX1,NFAT5,STUB1,LARP7,ZNF24,ERBB2,TACC3,ADAM15,MEF2A,CSRNP1,SNX27,NFATC4,SOD1,SERTAD1,BIRC5,MORF4L1,FANCL,E2F7,KLF5,CKS1B,BRCA2,ING1,EFEMP2,MAP4K4,DDX11,CTGF,F2R,UBR2,FAM20C,FNDC3B,MKI67,RBL1,EIF6,POLB,XRCC1,RAD23A,ARNT,ATP1A1,CD2AP,RARA,ZFX,CBFB,HIPK1,FRS2,HMBS,RTTEL1,DNMT1,NOVA1,TFDP1,CENPB,ANGPTL6,HIRA,PLEC,HBEGF,MTF2,ADAR,MED12,Amp32b,SH3GL1,MNT,ARHGAP5,AHI1,CREM,ARHGAP35,B9D1,FYN,SNAI2,MAP2,PLAGL1,CUL1,FKBP1A,CRLF2,ATP6AP1,H2AFZ,XRCC4,MAFG,HK2,KAT2B,RIF1,RINT1,CREB1,IGF1R,VCL,PMS2,BLMH,SUZ12,PIIF,ELL,TIAL1,MDM2,SLIT2,ACLY,F3,COPS3,SRXN1,CDK1,NCAPG2,SEN1,REV1,SBF1,H2AFY,CAP1,NCAM1,NAB2,PRPF19,VTI1A,VPRBP,Wasl,MNS1,IPPK,FBXW7,DICER1,AMD1,HSD3B7,METAP2,TBC1D4,SCARB1,ETS2,FASN,Map3k7,Dazap1,FOSL2,SOX4,STIL,COL4A1,PIIG,BIRC6,RAC1,RHEBL1,MUT,PALB2,NASP,Cdc42,TIMELESS,RHOA,USE1,SCRIB,INTU,CYLD,SBNO2,RCE1,JAG1,CDK2,BRD2,ZFAT,SPRED1,Nespas,SRRT,NGF,KMT2C,RAD9B,ZMIZ1,SCARB2,Cux1,POLR2A,PPP1R12A,FXN,GMNN,MAPKAPK2,ATG16L1,RHBDD3,RASSF1,HSPG2,UHRF1,TRA2B,HAT1,ATP2C1,LRRK2,TCF7L1,MTAP,PRMT1,MLLT1,TSHZ3,NFIB,ADAM9,PSMC3,CBFA2T2,MSN,RAF1,TRAI1,MYH9,PRKAB2,RDH10,TMEM38A,KRAS,SLC35C1,CCND1,ATP2A2,ADH5,KLF7,GATAD2A,EGR2,CENPE,FBLN1,MTHFD2,ATF4,ADORA2B,KLF1,MGAT1,HIPK2,UNG,TARBP2,GNE,TP53,ATG5,ESPL1,PAM,YAP1,UBE2Q1,CSNK1D,TPM3,TBK1,MAN1A2,DDR1,ATF2,Marcks,ATE1,PEX2,CCNF,FSCN1,FADS2,TFRC,XRCC5,FANCM,TRIM33,PTPN2,USF2,CEBPD,CDK4,PDS5B,PSEN2,COPS8,ALX1,CDKN3,KISS1R,CD47,ARF6,TRIM27,SOX1,ATP5J2,DAB2,ASPH,CSNK2B,NFE2L2,POMGNT2,CYP51A1,DHX9,ATP7B,SPRY1,CUL7,POLG,HNRNPD,VDAC3,TGS1,LAMB2,CCNE1,ZFPM2,NR4A2,UBR4,EIF4A1,MBD3,CDKN1A,PSAP,MSRA,SGCD,MAP3K3,TCF7L2,CASP7,PSEN1,SRSF2,LRIG2,ILF3,MSH3,RASA3,ATP2B1,KIF1B,PARP2,KLF6,ABCC10,PINX1,TLN1,RNASEH1,ATXN1L,CRLF3,CEBPG,MYC,TGFBF2,FDFT1,LEMED3,Gm21596/Hmgb1,EIF3D,PPP3R1,WDPCC,MYBL2,GCLM,CHTF18,WDR77,BRIP1,TAB1,PPP1R15B,ULK2,TOP3B,SYNE2,UBE4B,YWHAE,PNN,WASF1,HELLS,POFUT1,BUB1B,B3GALNT1,KMT2A,PFKM,SLC3A2,HNRNPAB,TFAM,PIAS4,DUSP1,XRCC6,RECQL4,MAD1L1,NDC80,HSP90AA1,LMNB2,CAPN2,FZD5,H1FO,ACTN4,SUV420H1,RPSA,RHBDF1,RUNX1,ARID1A,PPIB,UBE2N,GTF2I,ATF6,SMAD5,VPS4A,ETV6,RAD50,IGF2BP1,MLH1,ARFRP1,STIM2,RAD51,CCNA2,FANCD2,HLA-DMA,TIMP1,BMPR1A,LDB1,FOXO3,DNAJB1,STX4,EYA4,LRRC8A,PRDM6,RAD23B,WDR1,ARC,PRKCA,SLC20A1,POMT2,SDC1,CAPZB,SLC12A2,TUBG1,CANX,FOXM1,GIT1,FAIM,SH3PXD2A,NBN,IVNS1ABP,RCAN1,SS18L1,MAPK14,PRKCI,FOXO1,KIF5B,RAD9A,EHD4,MSH6,DCTN1,ATR,NR6A1,SOCS1,ABCA2,ITSN1,DNAJB4,TOR1A,CDC7,CDKN2C,ERI1,HES1,KPNA1,RICTOR,Rpl29 (includes others),CHAF1A,GSTZ1,CXCL10,VEGFA,IPMK,BAG1,MTF1,TARDBP,IRS2,TXN,HEY2,CENPJ,KMT2B,PITPNB,TIMP2,UPF2,STAT6,IMPA1,CFL1,NDRG1,TOBP1,FOXH1,MITF,COPS5,PTCH1,TFAP4,ITPR1,IRF1,TERF2,DOCK1,PTBP1,PCNA,PATZ1,BSG,GAB1,H2AFX,STIP1,E2F1,AHCTF1,CHKA,HPRT1,RAB11A,LRP8,MAPK7,CYR61,IFIT2,HIST1H1C,CTC1,ADAM17,ATF7,PDIA3,PKD2,CTNNA3,HMGN1,FNTB,SP2,VCAN,SGMS1,CHEK1,EP300,SRSF10,COL5A1,EFNB2,ID1,YY1,NCOA2,TCOF1,PRRX1,HUS1,ADK,DGCR8,TOP2A,LAMP1,E2F5,PDGFRA,CEBPA,BID,MCM10,MAP1LC3B,CACNB2,MCPH1,STIM1,RASSF5,HEXIM1,KHSRP,RXR8,POT1,PLOD3,PLAT,AIFM1,POGZ,RPS19,MYCN,Amp32e,C10orf2,PPP1R8,TBX3,INPP5E,ACTB,CENPU,DPAGT1,AGO2,DLX1,RAD51B,GINS4,MAFK,POLD1,SIN3A,FADD,KITLG,ABL2,MCM2,LIMS1,SREBF2,MUTYH,SPRY2,ADD1,PRMT5,ADAM10,GABPA,FEN1,RBPJ,NCOR2,MAFB,IREB2,PAFAH1B1,ZFP36L2,VPS52,DYRK1A,FZR1,PALLD,MAPK1,INSIG1,DIAPH3,MMP16,GNB5,TAF10,LATS2,AURKB,LMNB1,PTK2,FGFR3,SRSF1,SIVA1,SERP1,RORA,EZH2,ITGAV,SLC7A5,HTRA2,SIAH2,RAD51C,BRCA1,FBXO45,DLC1,CDC25A,STK11,FGFR1,ULK4,PSMC4,TBP,LMNA,RAB8A,TMOD3,SSRP1,WWP2,SRSF3,ARRB2,PKD1,CASP2,LIN9,CNPY3,PTPRS,POMT1,GNL3,EXTL3,VDAC1,PML,MTDH,Paxip1,INCENP,TEAD4,DRAP1,GABPB1,PKNOX1,ZBTB7A,MED23,NFIX,GDNF,PICALM,PDGFA,MARK2,PKM,RBBP8,ABL1,TNFAIP3,SLC7A1,ING4,BCLAF1,BCAR1,TCF12,FUT8,ROR2,SP1,RRN3,CIT,MAML3,ATF6B,RBM15,ERF,BLM,CTDNEP1,PHF21A,E2F8,DTL,SLC25A25,MAP2K7,CKS2,S1PR2,Nedd4,HDAC1,EFNA3,SMAD7,MAPK9,RPS6KA5,BCL3,USP1,NFKBIZ,NDUFA13,XIAP,AFF1,GNAI2,DNM1,RIPK1,PBX3,B4GALT1,LPAR1,SATB1,PANK3,SMARCC1,EIF2AK2,VGF,UBC,HMGCR,SHMT2,BCL2L11,WNT5A |

## Supplemental Table 7. General IPA functions for E2F1, E2F3A and E2F3B promoter targets

| ChIP-seq | Category                          | B-H p-value | Genes                                                                                                                                                                                                                                                                                                                                                                                                                                                                                                                                                                                                                                                                                                                                                                                                                                                                                                                                                                                                                                                                                                                                                                                                                                                                                                                                                                                                                                                                                                                                                                                                                                                                                                                                                                                                                                                                                                                                                                                                                                                                                                                                                                                                                                                                                                                                                                                                                                                                                                                                                                                                                                                                                                                                                                                                                                                                                                                                                                                                                                                                                                                                                                                                                                                                                                                                                                                                                                                                                                                                                                                                                                                                                                                                                                                                                                                                                                                                                                                                                                                                                                                                                                                                                                                                                                                                                                                                                                                                                                                                                                                                                                                                                                                                                                                                                                                                                                                                                                                                                                                                                                                                                                                                                                                                                                                                                                                                                                                                                                                                                                                                                                                                                                                                                |
|----------|-----------------------------------|-------------|------------------------------------------------------------------------------------------------------------------------------------------------------------------------------------------------------------------------------------------------------------------------------------------------------------------------------------------------------------------------------------------------------------------------------------------------------------------------------------------------------------------------------------------------------------------------------------------------------------------------------------------------------------------------------------------------------------------------------------------------------------------------------------------------------------------------------------------------------------------------------------------------------------------------------------------------------------------------------------------------------------------------------------------------------------------------------------------------------------------------------------------------------------------------------------------------------------------------------------------------------------------------------------------------------------------------------------------------------------------------------------------------------------------------------------------------------------------------------------------------------------------------------------------------------------------------------------------------------------------------------------------------------------------------------------------------------------------------------------------------------------------------------------------------------------------------------------------------------------------------------------------------------------------------------------------------------------------------------------------------------------------------------------------------------------------------------------------------------------------------------------------------------------------------------------------------------------------------------------------------------------------------------------------------------------------------------------------------------------------------------------------------------------------------------------------------------------------------------------------------------------------------------------------------------------------------------------------------------------------------------------------------------------------------------------------------------------------------------------------------------------------------------------------------------------------------------------------------------------------------------------------------------------------------------------------------------------------------------------------------------------------------------------------------------------------------------------------------------------------------------------------------------------------------------------------------------------------------------------------------------------------------------------------------------------------------------------------------------------------------------------------------------------------------------------------------------------------------------------------------------------------------------------------------------------------------------------------------------------------------------------------------------------------------------------------------------------------------------------------------------------------------------------------------------------------------------------------------------------------------------------------------------------------------------------------------------------------------------------------------------------------------------------------------------------------------------------------------------------------------------------------------------------------------------------------------------------------------------------------------------------------------------------------------------------------------------------------------------------------------------------------------------------------------------------------------------------------------------------------------------------------------------------------------------------------------------------------------------------------------------------------------------------------------------------------------------------------------------------------------------------------------------------------------------------------------------------------------------------------------------------------------------------------------------------------------------------------------------------------------------------------------------------------------------------------------------------------------------------------------------------------------------------------------------------------------------------------------------------------------------------------------------------------------------------------------------------------------------------------------------------------------------------------------------------------------------------------------------------------------------------------------------------------------------------------------------------------------------------------------------------------------------------------------------------------------------------------------------------------------------|
| E2F3B    | Cellular Growth and Proliferation | 3.23E-38    | TGFBF1, TLE1, FRMD6, ELAVL4, POR, TRIM32, CRADD, PPRC1, SMARCB1, ADA, SART3, ETS1, CCNE2, PEAK1, RELT, CRKL, RFC1, ZBTB5, DCLRE1A, DVL2, RAD18, ALCAM, ELMO2, MORC3, PIM3, DDIT3, PRDX4, PPIA, CDK10, SYNM, RABL6, NOTCH2, TIPARP, PELO, SLC12A6, IPO7, ID3, BUB1, MAD2L1, CDKN2A, EEF1A1, SMAD3, SMAP2, E2F6, CEP57, MAPK3, MTMR2, JUND, ING2, DYNC1H1, PIK3R3, BCL2L1, H3F3A/H3F3B, SUMO3, KLF10, PIAS1, RNASEH2B, PDE4A, CSRP1, GPHN, CLIC4, PDCD10, HDGF, SIX1, LARP7, ILKAP, PDK1, LASP1, TACC3, MEF2A, ALKBH5, SOD1, MORF4L1, PPM1G, TFCP2, E2F7, TSC22D1, ING1, BRPF1, SLC25A5, MAP4K4, EMP2, HNRNPL, ASPSCR1, AGPS, CTGF, UBR2, FNDC3B, RRAGB, ADIPOR1, XRCC1, RASGRF1, URGCP, ZFX, RAB17, CBFB, TTL5, HIPK1, FRS2, DNMT1, GET4, RND2, PIK3C2B, Irf5, TFDP1, CENPB, PLEC, HBEGF, GRK5, HMGA1, Anp32b, SH3GL1, SAC3D1, SNAI2, CDT1, PTPN13, PLAGL1, LEMD2, PTN, CUL1, POLR2J, FKBP1A, CAR2, FZD1, DNAJA1, H2AFZ, MAFG, GPR3, NEIL3, HK2, IGF1R, DAGLB, TXNL1, VCL, FKBP5, EED, OXTR, PSMB9, DDX56, USPL1, PLK1, ACLY, COPS3, F3, RRM1, SENP1, SBF1, RNF187, CAMKK1, GCAT, NCAM1, ARL2BP, PRPF19, CAV2, FBXW7, PBK, HSD3B7, YWHAQ, ETS2, TRIB2, Map3k7, AAGAB, Dazap1, TBC1D24, STIL, COL4A1, PSMF1, CLTC, BIRC6, DTNB, RHOJ, CDC123, MAT2B, NDUFAF2, SMARCD3, BRAT1, COL6A3, SCRIB, INTU, RCE1, HDGFRP3, FADS1, ZBTB49, NGF, DTYMK, ZMI1, Z1, NELLE, HINT1, TRIM24, FXN, USP47, RPAIN, SLC25A4, LRRK2, PFKP, NCAPH2, MLLT1, TTC7A, RAF1, RNF8, TRAP, MYH9, RDH10, MAP6, HMMR, NKAP, C6orf89, RCL1, KLF7, FBLN1, COPS6, TGIF2, KLF1, MGAT1, TYMS, GNE, CBX8, ATG5, PHIP, ESPL1, YAP1, APPL2, CDCA4, PEX2, FADS2, ANAPC5, TFRC, Meis1, PTPRA, PLXN A3, PTPN2, HNRNPA2B1, EEF1B2, PDS5B, CEBPD, CDK4, CTDSPL, DUSP22, SEPT11, MED28, COPS8, SDK1, LRRFIP1, CDKN3, SOS1, DAB2, ASPH, NFE2L2, PEMT, RAD21, DHX9, SERTAD2, HNRNPU, SPRY1, LZTS2, ING5, SLC29A1, LAMB2, CCNE1, ZFPM2, CAPRIN2, CDKN1A, EIF4A1, EIF2B1, PSAP, MSRA, LDHA, UBTF, PPIL1, MAP3K3, TCF7L2, CASP7, ID4, PSEN1, MAOA, RPL22, NCDN, CAMK1D, MSH3, NME2, PIEZO1, ABCC10, TNL1, NUDC, CRLF3, TGFB2, MYC, Gm21596/Hmgb1, SAE1, PPP3R1, Hmga2, FIGNL1, SUGT1, CEP131, CNOT6, WDR77, RNF41, KLF11, EIF4B, SMC3, FSTL3, GABPB2, KANK2, PNN, RBFOX2, HELLS, TUSC3, SNX3, ARIH1, NT5C3A, CDC42BPB, HNRNPAB, MATN2, XRCC6, CDCA7L, TXN2, ETV4, RECQL4, HSP90AA1, MAD1L1, FZD5, ACTN4, FAM83D, SUV420H1, PIDD1, RBBP4, ABI2, DPYSL3, UBE2N, RPS6KA3, WDR6, IGF2BP1, ETV6, RAD50, STIM2, RAD51, TRA2A, CCNA2, DIAPH1, AHNAC, TIMP1, BMPR1A, HLA-DMA, NOP58, STX4, CIZ1, LRR8A, PRKCA, SLC20A1, RFX1, SDC1, SLC12A2, CHERP, HSPD1, MTHFD1, CNOT8, SH3PXD2A, FAIM, SLK, SS18L1, MAPK14, PRKCI, FOXO1, RAD9A, PSMD2, AMIGO1, SGK1, CDKN2C, SFPQ, ZNF451, ERI1, RICTOR, Rpl29 (includes others), RS1, RECQL, VEGFA, CXCL10, DYNLL1, IPMK, CSTF2, HEY2, KIN, MITF, CNOT6L, RPA1, FANCC, ITPR1, PLCL2, IRF1, GEMIN2, TERF2, DOCK1, PCNA, PATZ1, INO80, RFC4, YARS, PSMB2, IRS1, BHLHE40, E2F1, MSH5, RGL2, LRP8, YEATS4, PHLPP1, CAPZA1, VASH2, PKD2, CAMK2N2, FNTB, SP2, VCAN, SGMS1, TAX1BP3, EP300, CHEK1, WTAP, TRIB1, DHPS, NCOA2, USP42, PRRX1, ADK, LAMP1, DAP3, E2F5, NAA60, PRKCE, MCM10, PLOD3, PLAT, RPS19, DLX1, RAD51B, CINP, MAFK, SIN3A, DGKZ, KIF15, SPDYA, ABL2, MCM2, RBM6, UNK, ADAM10, PRMT5, KCTD5, GABPA, FEN1, DNPH1, NCOR2, ZFP36L2, SCAMP3, ASH2L, POLH, FZR1, EPS15, VPS28, INSIG1, DIAPH3, PAK1IP1, MELK, STMN1, PTK2, EZH2, HTRA2, ARHGFE25, FBXO45, MYO10, ATP5G2, GPS2, FGFR1, PSMC4, RAB8A, LMNA, RANBP1, TMOD3, ELF1, GSR, ARRB2, FLOT2, CORO1B, PTPRS, TMPO, MTDH, PML, PHF1, YTHDF2, CNBP, RFC3, PAFAH1B2, TEAD4, KDM3B, PKNOX1, ZBTB7A, PDGFA, MARK2, ING4, FUT8, Ppp1cc, HNRNPR, SP1, CIT, MANF, MICALL1, LTPB4, RBM15, DTL, TIMM8A, MAP2K7, CKS2, S1PR2, Nedd4, ATG10, C2CD3, SMAD7, Irf7, BCL3, RPS6KA5, GNAI2, ENO1, B4GALT1, SLC25A27, PAQR4, SMARCC1, UBC, VGF, HMGCR, SHMT2, BCL2L11, MCM7, WNT5A, LGALS1, mir-130, NPM1, KIF13B, TPD52L2, CTCF, PRKAB1, POLA1, TAB2, CCNB2, SECISBP2, Ewsr1, EIF3B, PRKCD, PLXNB2, MOB1A, AHCY, SLC2A1, PIGF, STK25, TCF3, SP4, DAXX, ITPR3, PRKACA, ECT2, FANCA, KIF20A, FLNB, NRG2, EIF4EBP2, PRDX1, BAG6, GNA11, MTCH1, TTK, HEXB, EP400, KHDRBS1, TUBB4B, GAS1, ZNF521, MAPK6, GREM1, KAT5, IGF2R, BAK1, MCM3, MSH2, CSF1, SLC29A2, MAZ, ACTL6A, KIF23, SOCS3, MPRIP, YWHAH, LHX2, SEPT9, SFMBT1, CCT2, GNPAT, ZFPM1, HDAC10, RNF7, RPGRIP1L, ECD, RGD4 (includes others), SMC1A, SOX2, USP8, CD164, ANXA11, ERAL1, GPX4, EPHA7, OSBPL1A, HDAC2, WEE1, IFT74, RDX, POLR2H, PFDN5, CYP20A1, NDC1, PTPRM, CDCA2, TXNRD1, UBE2I, PBRM1, PEBP1, ALG14, LITAF, RND1, KIAA0101, CHSY1, BARD1, INPPL1, E2F3, IQGAP1, PTGES3, NFAT5, STUB1, ZNF24, ERBB2, VAV2, NDUFV1, KDM4C, ADAM15, RACGAP1, SMARCE1, NFATC4, G3BP1, TSN, SERTAD1, ALS2, BIRC5, FANCL, SERTAD3, KLF5, CKS1B, BRCA2, F2R, MTBP, SUV39H1, RAN, DDX20, MKI67, HBP1, RBL1, EIF6, HIST1H2AB, POLB, ARNT, RAD23A, CD2AP, AHS1A, RARA, MGAT4B, LEPROT, AFAP1, PTPRG, ANGPTL6, YWHAZ, MTF2, ADAR, MED12, CMI1, ARHGAP5, MNT, FUT10, SSBP1, RERE, AHI1, CREM, FYN, OSR2, MAP2, ARHGFE7, TTL4, STRA13, HMGB2, NAA35, CRLF2, EIF4G1, SF3B3, XRCC4, CDH11, EIF4EBP1, KAT2B, DIS3L2, CREB1, WSB1, PMS2, SUZ12, PPIF, HDGFRP2, ELL, TIAL1, MDM2, SLIT2, NAP1L1, SCMH1, SCAF11, CBLN1, CDK1, CCDC85B, IMMT, RNF144A, GTPBP3, CIRBP, H2AFY, HOXB9, WDR48, NAB2, STRN, FARP1, VT11A, ARF1, VPRBP, Wasl, MNS1, UNC5B, DICER1, AMD1, METAP2, CAMK2D, SCARB1, STAG1, FASN, FOSL2, MCM5, SOX4, HK1, DTNBP1, RAC1, PREX2, CCDC155, SIX5, PREP, HERC2, VRK3, Cdc42, NASP, TIMELESS, RHOA, SH2B3, LOXL1, NUAQ1, CYLD, SPTAN1, JAG1, CDK2, KDM3A, BRD2, ZFAT, SRM, COPS4, SH3BP4, SPRED1, PA2G4, SRRT, GADD45G, TXLNA, KMT2C, Cux1, SET, UHRF2, GTF2B, PPP1R12A, CSTF2T, GMN |

## Supplemental Table 7. General IPA functions for E2F1, E2F3A and E2F3B promoter targets

| ChIP-seq | Category                                   | B-H p-value | Genes                                                                                                                                                                                                                                                                                                                                                                                                                                                                                                                                                                                                                                                                                                                                                                                                                                                                                                                                                                                                                                                                                                                                                                                                                                                                                                                                                                                                                                                                                                                                                                                                                                                                                                                                                                                                                                                                                                                                                                                                                                                                                                                                                                                                                                                                                                                                                                                                                                                                                                                                                                                                                                                                                                                                                                                                                                                                                                                                                                                                                                                                                                                                                                                                                                                                                                                                                                                                                                                                                               |
|----------|--------------------------------------------|-------------|-----------------------------------------------------------------------------------------------------------------------------------------------------------------------------------------------------------------------------------------------------------------------------------------------------------------------------------------------------------------------------------------------------------------------------------------------------------------------------------------------------------------------------------------------------------------------------------------------------------------------------------------------------------------------------------------------------------------------------------------------------------------------------------------------------------------------------------------------------------------------------------------------------------------------------------------------------------------------------------------------------------------------------------------------------------------------------------------------------------------------------------------------------------------------------------------------------------------------------------------------------------------------------------------------------------------------------------------------------------------------------------------------------------------------------------------------------------------------------------------------------------------------------------------------------------------------------------------------------------------------------------------------------------------------------------------------------------------------------------------------------------------------------------------------------------------------------------------------------------------------------------------------------------------------------------------------------------------------------------------------------------------------------------------------------------------------------------------------------------------------------------------------------------------------------------------------------------------------------------------------------------------------------------------------------------------------------------------------------------------------------------------------------------------------------------------------------------------------------------------------------------------------------------------------------------------------------------------------------------------------------------------------------------------------------------------------------------------------------------------------------------------------------------------------------------------------------------------------------------------------------------------------------------------------------------------------------------------------------------------------------------------------------------------------------------------------------------------------------------------------------------------------------------------------------------------------------------------------------------------------------------------------------------------------------------------------------------------------------------------------------------------------------------------------------------------------------------------------------------------------------|
| E2F3B    | DNA Replication, Recombination, and Repair | 2.36E-37    | mir-130,NPM1,TIMM13,CTCF,POLA1,SMARCD2,CCNB2,GPSM2,Ewsr1,SMARCB1,ADA,CENPW,FBL,HCFC1,CCNE2,RFC1,TMEM67,TCF3,MASTL,DCLRE1A,DAXX,REXO4,EYA3,PRKACA,RAD18,ECT2,FANCA,NRG2,DDIT3,PRDX1,BAG6,PIIA,MTCH1,TTK,CDK10,WRNIP1,PELO,ATN1,EXO1,GREM1,KAT5,ID3,BAK1,ENDOV,BUB1,MCM3,MAD2L1,MSH2,CSF1,MAZ,FBXO5,ACTL6A,CDKN2A,KIF23,SOCS3,SMAD3,TDP1,SMC1A,INTS3,E2F6,CEP57,MAPK3,GPX4,ZWINT,ING2,ESCO2,HDAC2,WEE1,DNA2,RAD54L,NDC1,CDCA2,PIK3R3,BCL2L1,GINS1,SF3B4,CEP76,HIRIP3,POLD2,UBE2I,PEBP1,PBRM1,KIAA0101,SKA2,BARD1,MCM3AP,RNASEH2B,NEDD1,ZNF219,INPPL1,RBBP5,IQGAP1,E2F3,LSM2,HMGF,SIX1,NFAT5,ERBB2,TACC3,RACGAP1,SMARCE1,PSMC3IP,SMARCD1,SOD1,TSN,SERTAD1,BIRC5,PPM1G,MORF4L1,FANCL,CENPI,CKS1B,BRCA2,ING1,MCM6,CCP110,F2R,MTBP,SUV39H1,RAN,RBL1,RAD23A,XRCC1,POLB,RASGRF1,RARA,TDP2,HIPK1,DNMT1,RTEL1,PABPC1,TFDP1,HIRA,HBEGF,MDC1,HMGA1,RNASEH2A,RNF168,SSBP1,RERE,CDAN1,CREM,SAC3D1,SGOL1,FYN,NCAPD3,CDT1,UVSSA,PTN,CUL1,POLQ,STRA13,CNTROB,HMGB2,EIF4G1,DNAJA1,SF3B3,XRCC4,NEIL3,RIF1,KAT2B,CREB1,RFC2,IGF1R,CEP152,DUT,PM S2,BANP,SPC25,POLE,SUPT4H1,TIAL1,SMC6,MDM2,PLK1,NAP1L1,SCMH1,NCAPG2,CDK1,RRM1,SPIDR,MUM1,REV1,BABAM1,WDR48,PRPF19,VPRBP,ATRIP,FBXW7,DICER1,PBK,STAG1,PPP1R7,NCAPH,BOD1L1,SNU13,AAGAB,SOX4,STIL,POLE2,RAC1,CCDC155,SMARCD3,HERC2,PALB2,NASP,Cdc42,BRAT1,TIMELESS,SMC2,RHOA,CDK2,CDK5RAP2,EXOG,GADD45G,CENPC,NGF,WDHD1,SET,Pgap2,GMNN,USP47,GTPBP4,MAPKAPK2,NCL,IPO5,RPAIN,RASSF1,UBR5,UHRF1,SNRPB,HAT1,PHF13,PHLDA3,NCAPH2,PRMT1,CDKN2AIP,NT5M,DSCC1,RPS27L,MIS12,CENPH,RAF1,RMI1,MINPP1,RNF8,SMC5,KRAS,CCND1,CDIP1,PKN2,CENPE,SUMO1,NEK6,ADORA2B,RUVBL2,KLF1,HIPK2,UNG,CBX8,TYMS,TP53,ATG5,PHIP,ESPL1,YAP1,RRM2,CSNK1D,CDCA4,ATF2,SKP2,HSPA8,ATE1,CCNF,SUPT16H,BTG2,CENPT,CHD1L,PTPRA,XRCC5,FANCM,DEK,TRIM33,ERCC4,CDK4,PRPF4,NUF2,MMS22L,SPAG5,CDKN3,CD47,KIF2C,ESCO1,RAD21,DHX9,HNRNPU,TUBGCP6,POLG,ING5,VDAC3,NCAPD2,SLC29A1,CCNE1,IGHMBP2,NR4A2,CDKN1A,SPICE1,POLA2,RAD51AP1,CASP7,PSEN1,DLGAP5,MSH3,VPS13A,SLF2,PARP2,RFWD3,SMC4,KNTC1,SART1,RNASEH1,SKA1,CEBPG,TGFB2,MYC,ZW10,Gm21596/Hmgb1,RCC1,PIM1,FIGNL1,XPO1,MYBL2,CEP131,BRIP1,SNRPA1,TOP3B,SMC3,YWHAE,KANK2,ORC6,HELLS,BUB1B,ERCC6L,PIAS4,TFAM,DUSP1,RECQL4,XRCC6,NDC80,MA D1L1,CAPN2,SUV420H1,PIDD1,RBBP4,RUNX1,TNFAIP8,ARID1A,PIIB,UBE2N,ETV6,RAD50,MLH1,RAD51,CCNA2,FANCD2,NET1,FOXO3,SNRPD2,DNAJB1,CIZ1,MCM9,RPS3,LONP1,C10orf88,LRWD1,RAD23B,PRKCA,TUBG1,FOXO1,NBN,RPA2,FAM111A,MAPK14,FOXO1,KIF5B,RAD9A,MSH6,ATR,KIF18A,CENPF,SGK1,CDC7,CDKN2C,SFPQ,KPNA1,CHAF1A,RECQL,CXCL10,VEGFA,DYNLL1,INTS7,IPMK,TARDBP,IRS2,KIN,LSM4,TIMP2,CENPJ,STAT6,TIPIN,TOBP1,MITF,COPS5,RPA1,TFAP4,FANCC,IRF1,TERF2,PTBP1,CCNO,PCNA,NSMCE2,INO80,BSG,GAB1,IRS1,H2AFX,E2F1,MBD4,ORC5,MSH5,CLSPN,MAPK7,HELB,CYR61,CTC1,PDIA3,HMGN1,ASF1A,SETX,SASS6,EP300,CHEK1,ID1,YY1,NCOA2,ADK,HUS1,E2F5,CEBPA,TOP2A,EIF3A,PDGFRA,BID,MCPH1,MCM10,POT1,ZWILCH,AIFM1,POGZ,mir-199,ADRM1,DCK,C10orf2,CDC6,RAD51B,POLD1,PPP2R5A,SIN3A,FADD,KITLG,DGKZ,SLC30A9,SF3B2,SPDYA,MCM2,NDE1,MUTYH,ASCC3,FEN1,RBPJ,PAFAH1B1,HINFP,ASH2L,POLH,SMARCAD1,FZR1,MCM8,VPS28,MAPK1,MELK,MEPCE,LATS2,AURKB,PTK2,ROCK2,POLD3,EZH2,NIPBL,INIP,RAD51C,BRCA1,FBXO45,CDC25A,APITD1/APITD1-CORT,IGFBP6,Ftx,KIF14,FGFR1,MACROD1,STK11,LMNA,SSRP1,ARRB2,RNF4,CCNG2,CASP2,BAZ1B,TMPO,PHF1,PML,Paxip1,ORC4,KIF11,INCENP,RFC3,PRIMPOL,OBFC1,ZBTB7A,GDNF,PDGFA,RBBP8,ABL1,Tif1,ING4,TAOK1,BCLAF1,BCAR1,MCM4,CCDC88A,Ppp1cc,SP1,PMF1/PMF1-BGLAP,CIT,BLM,DTL,S1PR2,CKS2,COPS7A,HDAC1,let-7,SMAD7,MAPK9,BCL3,USP1,UBE2T,GNAI2,ENO1,SATB1,EIF2AK2,SMARCC1,TONSL,LGALS1,MCM7 |

## Supplemental Table 7. General IPA functions for E2F1, E2F3A and E2F3B promoter targets

| ChIP-seq | Category | B-H p-value | Genes                                                                                                                                                                                                                                                                                                                                                                                                                                                                                                                                                                                                                                                                                                                                                                                                                                                                                                                                                                                                                                                                                                                                                                                                                                                                                                                                                                                                                                                                                                                                                                                                                                                                                                                                                                                                                                                                                                                                                                                                                                                                                                                                                                                                                                                                                                                                                                                                                                                                                                                                                                                                                                                                                                                                                                                                                                                                                                                                                                                                                                                                                                                                                                                                                                                                                                                                                                                                                                                                                                                                                                                                                                                                                                                                                                                                                                                                                                                                                                                                                                                                                                                                                                                                                                                                                                                                                                                                                                                                                                                                                                                                                                                                                                                                                                                                                                                                                                                                                                                                           |
|----------|----------|-------------|-----------------------------------------------------------------------------------------------------------------------------------------------------------------------------------------------------------------------------------------------------------------------------------------------------------------------------------------------------------------------------------------------------------------------------------------------------------------------------------------------------------------------------------------------------------------------------------------------------------------------------------------------------------------------------------------------------------------------------------------------------------------------------------------------------------------------------------------------------------------------------------------------------------------------------------------------------------------------------------------------------------------------------------------------------------------------------------------------------------------------------------------------------------------------------------------------------------------------------------------------------------------------------------------------------------------------------------------------------------------------------------------------------------------------------------------------------------------------------------------------------------------------------------------------------------------------------------------------------------------------------------------------------------------------------------------------------------------------------------------------------------------------------------------------------------------------------------------------------------------------------------------------------------------------------------------------------------------------------------------------------------------------------------------------------------------------------------------------------------------------------------------------------------------------------------------------------------------------------------------------------------------------------------------------------------------------------------------------------------------------------------------------------------------------------------------------------------------------------------------------------------------------------------------------------------------------------------------------------------------------------------------------------------------------------------------------------------------------------------------------------------------------------------------------------------------------------------------------------------------------------------------------------------------------------------------------------------------------------------------------------------------------------------------------------------------------------------------------------------------------------------------------------------------------------------------------------------------------------------------------------------------------------------------------------------------------------------------------------------------------------------------------------------------------------------------------------------------------------------------------------------------------------------------------------------------------------------------------------------------------------------------------------------------------------------------------------------------------------------------------------------------------------------------------------------------------------------------------------------------------------------------------------------------------------------------------------------------------------------------------------------------------------------------------------------------------------------------------------------------------------------------------------------------------------------------------------------------------------------------------------------------------------------------------------------------------------------------------------------------------------------------------------------------------------------------------------------------------------------------------------------------------------------------------------------------------------------------------------------------------------------------------------------------------------------------------------------------------------------------------------------------------------------------------------------------------------------------------------------------------------------------------------------------------------------------------------------------------------------------------------------------|
| E2F3B    | Cancer   | 1.05E-29    | TGFBF1,GARS,CRADD,SMARCB1,MARCH2,ADA,SART3,ETS1,SRPR,RFC1,TMEM67,HIST1H2BM,EYA3,ALCAM,TMEM43,ELMO2,CPOX,PIM3,DDIT3,SLC1A5,NOTCH2,PTPN4,RABL6,BNIP1,IBTK,PCNXL3,RNF19A,GPC6,EXO1,SLC12A6,LSM14B,CSGALNACT1,CDS2,KPNB1,MAD2L1,PLXDC1,AP1G1,PIGU,GMPPA,SMAD3,DEPDC5,SMAP2,E2F6,CEP57,SNRPD1,MTMR2,ZWINT,ING2,KCNAB2,PTPDC1,PHRF1,DYNC1H1,PIK3R3,YPEL5,SEC61A2,AGBL3,POLD2,FAM134A,MCCC2,ZC3H7B,FLYWCH1,GFOD2,NEDD1,ZBTB2,GPHN,CLIC4,C20orf24,HDGF,ILKAP,IGSF8,PKD1,LASP1,FRA10AC1,TACC3,MEF2A,HERPUD1,SNX27,UBE2D1,FAM122A,BRD3,TUBB6,PAPD7,ING1,BRPF1,HNRNPL,RAP2B,MCM6,AGPS,CTGF,ZFP62,MRPL20,UBR2,FAM20C,ZNF436,HOMER3,PPP1R21,ADIPOR1,XRCC1,RNF38,ZFP41,SLC22A15,HIST1H2AJ,ZFX,RAB17,TDP2,CBFB,CCNT2,TTL5,HIPK1,FRS2,DNMT1,C19orf57,PABPC1,GET4,PIK3C2B,NOVA1,TFDP1,HIRA,PLEC,ZC3HAV1,HBEGF,GRK5,CNOT10,AGFG2,AP5Z1,MEX3A,SPOP,PHLDB1,RNF168,FAM222A,C11orf30,NCLN,RMND1,KIAA0368,SGOL1,HAUS6,TMEM158,R3HCC1L,GALC,NCAPD3,CDT1,PTPN13,PLAGL1,LEMD2,CUL1,SPATA13,CENPN,FKBP1A,CCAR2,FZD1,DNAJA1,H2AFZ,TOR1AIP1,ATP6AP1,GPR3,HK2,RINT1,RNPS1,TICRR,RFC2,TXNL1,PPM1F,VCL,TCTN3,NCBP3,TTC39B,FKBP5,OXTR,PSMB9,PKN3,CEP152,STAMBPL1,BLMH,BANP,DDX56,USPL1,SMC6,COPS3,NCAPG2,RRM1,ADSS,ZNF546,SENP1,SBF1,MUM1,CAMKK1,KDEL3,ZNF507,TRERF1,ARL14EP,COBLL1,NCAM1,IPPK,TMEM74B,HSD3B7,FAM208A,YWHAQ,NAF1,KHNYN,PPP1R7,TRIB2,DDI2,RPRD2,GOLGA1,TBC1D24,COL4A1,PSMF1,CLTC,BIRC6,DTNB,ALAD,CDC123,ATP10A,NDUFAF2,MAT2B,BRAT1,COL6A3,C15orf41,INTU,KBTBD8,FADS1,CCNC,ZBTB49,NGF,RAD9B,NELFE,PDP2,HINT1,MAN2C1,POLR2A,FXN,USP47,DSCR3,RPAIN,SLC25A4,PFKP,TCF7L1,TSHZ3,FAF1,HMG20B,TTC7A,MTRF1L,H2AFV,TEX9,DDHD2,NIPA2,WDR90,PCBP1,RALGAPB,WDR20,SLC35C1,ZFYVE1,ZC3H12C,ZNF689,CENPE,COPS6,EHD2,ATP5G3,CERS6,TUBGCP3,APPL2,YAP1,FAM118A,EEF2,C4orf32,MAN1A2,WDR81,ATE1,SYNJ2,PLEKHG2,MORC2,OGFOD2,DYNC1L2,GTSE1,ANAPC5,ZC3H7A,ZDHHC1,FAM19A2,FRG1,ANKLE1,TMEM64,TRAPPC5,FAM188B,FANCM,DEK,FBXO7,CEP97,ARL4C,HNRNPA2B1,ODF2L,RHOT2,CDK4,CEBPD,PDS5B,CTDSPL,KIAA0754,MED28,SEPT11,NUF2,SDK1,CDKN3,TMEM209,NAA15,GINS2,MAP4,PRR14L,SOS1,ATPAF1,ALG8,CDC5L,PEMT,ESCO1,RAD21,SLC35A5,ZMYM1,DENND4A,WIPF2,SPRY1,OLFML3,LARP4B,RCCD1,LAMB2,IGHMBP2,PRPF18,UBR4,ABCF2,ATP13A3,ZSWIM8,EIF4A1,ZFHX2,BTF3L4,MSRA,UBTF,PPIL1,ID4,FOXN2,TMCC1,LRIG2,PDZD7,MEGF9,KIF1B,SLC41A3,NME2,LMBR1L,CEBPG,LRRC57,MYC,TGFBF2,ZW10,SMPD4,AHDC1,PPP3R1,AMOTL2,FIGNL1,AP5M1,SUGT1,WDR77,DPM3,CNOT6,SNRPA1,KLF11,RNF41,EIF4B,PRPF38A,ARHGAP11A,SPECC1,TEX264,LIPT2,FSTL3,KANK2,SAP30BP,DDOST,PSMD6,RBFOX2,BTBD8,B3GALNT1,WDYHV1,ARIH1,GMEB2,USP32,TXN2,CDC47L,XRCC6,ETV4,SEPT10,NDC80,RUSC2,MAD1L1,HSP90AA1,SEC31B,NCKAP5L,FZD5,SSFA2,ACTN4,SUV420H1,GEMIN7,MGST3,RBBP4,DPYSL3,NEURL4,SLC39A14,SPTSSA,ETV6,ARFRP1,TRA2A,RABEPK,DIAPH1,LYST,SPAG7,FYTTD1,NOP58,MEX3B,LCMT2,ACAD8,STX4,RPS3,ACO1,VARS,CIZ1,CNNM3,BTBD10,POMT2,HAUS8,RFX1,MORN1,CANX,NMT2,RPL23,NFKBIL1,AMPD2,FAIM,SH3PXD2A,CCDC34,SLK,FAM111A,MAPK14,RAD9A,LSM11,COX8A,ZNF451,CDKN2C,ERI1,PHACTR4,KPNA1,GSTZ1,FANCB,DYNLL1,ZNF367,MTF1,HNRNPUL1,EEFSEC,CSTF2,HEY2,KIN,KMT2B,TMEM55B,MITF,PGLS,GPATCH8,NAT10,FANCC,PLCL2,ZNF414,DONSON,IRF1,DOCK1,PCNA,INO80,RFC4,PSMB2,IRS1,CPNE8,E2F1,GLRA1,MSH5,HELB,YEATS4,SCAP,PKD2,SASS6,VCAN,SGMS1,EP300,XYLB,TRIB1,NCOA2,POLR2M,PRRX1,USP42,SLC6A17,LAMP1,E2F5,PRKCE,NAA60,MCM10,ZWILCH,PLOD3,EPG5,CWC22,TOR1AIP2,MAFK,ATXN2L,POLD1,STXBP6,PCDH9,RPIA,WDR76,KIF15,ABL2,PVT1,RBM6,PRMT5,FEN1,NCOR2,DNPH1,USP49,VPS52,ASH2L,POLH,RPL11,INSIG1,DPY19L4,LARS,UBXN4,EZH2,FBXO45,ADPRHL2,PMPCA,CPNE2,AIM1,RASAL2,FGFR1,PSMC4,LMNA,RANBP1,TMOD3,GSR,ABHD17C,PLEKHH2,PCGF1,PTPRS,C1orf27,PFAS,PHF1,TMPO,PEX12,PAFAH1B2,KDM3B,TEAD4,VWA1,DRAP1,GABPB1,CCDC85C,GTF2F2,SLC25A29,CHPF,MARK2,MEIS2,NUP50,TAOK1,GANAB,PMF1/PMF1-BGLAP,CIT,LTBP4,PHF21A,MAP2K7,S1PR2,MRC2,ATG10,let-7,BCL3,ANAPC13,LRCH1,GNAI2,KIF24,ZNF704,DYM,PANK3,PAQR4,TONSL,SMARCC1,UBC,VGF,LRR1,SNTB2,CAB39,SLC6A9,POLA1,NUP133,SMARCD2,CCNB2,EIF4A2,GPSM2,CNPPD1,SECISBP2,Ewsr1,EIF3B,PRKCDBP,MAP1A,DUSP11,FAM172A,AHCY,FBL,HCFC1,PIGF,CD3EAP,MSMO1,RGP1,GART,DAXX,CNTRL,KAT6A,ITPR3,PRKACA,COX18,CELSR3,C3orf67,ECT2,CCDC138,CPE,FANCA,KIF20A,FLNB,EIF4EBP2,IRAK1BP1,BAG6,GNA11,SERHL2,CEBPZ,MTC1,PNRC1,HEXB,C2CD5,HIST2H3D,KPNA3,FKBP3,EP400,PMM1,GAS1,PASK,MAPK6,GREM1,IGF2R,BAK1,RPS16,CSF1,SEPHS1,CHAC1,SLC29A2,COX7A2,FBXO5,C12orf66,TFB1M,NAV2,MPRIIP,LHX2,YWHAH,CCT2,GNPAT,NUP58,HDAC10,ZFPM1,LIPT1,ECD,PPFIBP1,SMC1A,RGPD4 (includes others),SOX2,TSEN15,ANXA11,ERAL1,EPHA7,OSBPL1A,STXBP1,SESN3,WEE1,IFT74,POLR2H,H6PD,PTPRM,CDCA2,OSBPL8,CAND1,KIAA0907,AEBP2,HIRIP3,SLC25A10,TMEM248,UBE2I,FOXP4,ALG14,INTS10,LITAF,RND1,DDX26B,OSBPL6,KIAA0101,BARD1,CHSY1,PVRL3,MCM3AP,ZNF219,SPSB3,ALAS1,RBBP5,IQGAP1,ZFAND2A,BCL7B,NFAT5,RPL18A,ERBB2,NAA40,VAV2,KDM4C,NDUFV1,AP3M1,IFT46,ADAM15,RACGAP1,CSRNP1,SMARCD1,NFATC4,SERTAD1,SLC7A6OS,TSN,BIRC5,ALS2,UMPS,MTO1,FANCL,SLC36A4,KLF5,ZDHHC3,BORA,DDX11,F2R,MTBP,DSTN,SUV39H1,RAN,ZNF76,GTF2E2,GHITM,DDX20,HBP1,MKI67,EIF6,Cvb5r3,RBL1,HIST1H2AB,RPS11,RAD23A,POLB,ARNT,CXorf23,CD2AP,ATP1A1,AHSA1,RARA,MGAT4B,MED16,BAG5,RTEL1,CNOT1. |

## Supplemental Table 7. General IPA functions for E2F1, E2F3A and E2F3B promoter targets

| ChIP-seq | Category                            | B-H p-value | Genes                                                                                                                                                                                                                                                                                                                                                                                                                                                                                                                                                                                                                                                                                                                                                                                                                                                                                                                                                                                                                                                                                                                                                                                                                                                                                                                                                                                                                                                                                                                                                                                                                                                                                                                                                                                                                                                                                                                                                                                                                                                                                                                                                                                                                                                                                                                                                                                                                                                                                                                                                                                                                                                                                                                                                                                                                                                                                                                                                                                                                                                                                                                                                                                                                                                                                                                                                                                                                                                                                                                                                                                                                                                                                                                                                                                                                                                                                                                                                                                                                                                                                                                                                                                                                                                                                                                                                                                                                                                                                                                                                                                                                                                                                                                                                                                                                                                                                                                                                                                                                                                                                                                                                                                                                                                                                                                                                                                                                                                                                                                                                                                                                                                                                                                                                                                                                                |
|----------|-------------------------------------|-------------|--------------------------------------------------------------------------------------------------------------------------------------------------------------------------------------------------------------------------------------------------------------------------------------------------------------------------------------------------------------------------------------------------------------------------------------------------------------------------------------------------------------------------------------------------------------------------------------------------------------------------------------------------------------------------------------------------------------------------------------------------------------------------------------------------------------------------------------------------------------------------------------------------------------------------------------------------------------------------------------------------------------------------------------------------------------------------------------------------------------------------------------------------------------------------------------------------------------------------------------------------------------------------------------------------------------------------------------------------------------------------------------------------------------------------------------------------------------------------------------------------------------------------------------------------------------------------------------------------------------------------------------------------------------------------------------------------------------------------------------------------------------------------------------------------------------------------------------------------------------------------------------------------------------------------------------------------------------------------------------------------------------------------------------------------------------------------------------------------------------------------------------------------------------------------------------------------------------------------------------------------------------------------------------------------------------------------------------------------------------------------------------------------------------------------------------------------------------------------------------------------------------------------------------------------------------------------------------------------------------------------------------------------------------------------------------------------------------------------------------------------------------------------------------------------------------------------------------------------------------------------------------------------------------------------------------------------------------------------------------------------------------------------------------------------------------------------------------------------------------------------------------------------------------------------------------------------------------------------------------------------------------------------------------------------------------------------------------------------------------------------------------------------------------------------------------------------------------------------------------------------------------------------------------------------------------------------------------------------------------------------------------------------------------------------------------------------------------------------------------------------------------------------------------------------------------------------------------------------------------------------------------------------------------------------------------------------------------------------------------------------------------------------------------------------------------------------------------------------------------------------------------------------------------------------------------------------------------------------------------------------------------------------------------------------------------------------------------------------------------------------------------------------------------------------------------------------------------------------------------------------------------------------------------------------------------------------------------------------------------------------------------------------------------------------------------------------------------------------------------------------------------------------------------------------------------------------------------------------------------------------------------------------------------------------------------------------------------------------------------------------------------------------------------------------------------------------------------------------------------------------------------------------------------------------------------------------------------------------------------------------------------------------------------------------------------------------------------------------------------------------------------------------------------------------------------------------------------------------------------------------------------------------------------------------------------------------------------------------------------------------------------------------------------------------------------------------------------------------------------------------------------------------------------------------------------------------------------|
| E2F3B    | Organismal Injury and Abnormalities | 1.05E-29    | TGFB1, GARS, CRADD, SMARCB1, MARCH2, ADA, DAZAP2, SART3, ETS1, SRPR, RFC1, TMEM67, HIST1H2BM, EYA3, ALCAM, TMEM43, ELMO2, CPOX, PIM3, DDIT3, SLC1A5, NOTCH2, PTPN4, RABL6, BNIP1, IBTK, PCNXL3, RNF19A, GPC6, EXO1, SLC12A6, LSM14B, CSGALNACT1, CDS2, KPNB1, MAD2L1, PLXDC1, AP1G1, PIGU, GMPPA, SMAD3, DEPDC5, SMAP2, E2F6, CEP57, SNRPD1, MTMR2, ZWINT, ING2, KCNAB2, PTPDC1, PHRF1, DYNC1H1, PIK3R3, YPEL5, SEC61A2, AGBL3, POLD2, FAM134A, MCCC2, ZC3H7B, FLYWCH1, GFOD2, NEDD1, ZBTB2, GPHN, CLIC4, C20orf24, HDGF, ILKAP, IGSF8, PDK1, LASP1, FRA10AC1, TACC3, MEF2A, HERPUD1, SNX27, UBE2D1, FAM122A, BRD3, TUBB6, PAPP7, ING1, BRPF1, HNRNPL, RAP2B, MCM6, AGPS, CTGF, ZFP62, MRPL20, UBR2, FAM20C, ZNF436, HOMER3, PPP1R21, ADIPOR1, XRCC1, RNF38, ZFP41, SLC22A15, HIST1H2AJ, ZFX, RAB17, TDP2, CBFB, CCNT2, TTL5, HIPK1, FRS2, DNMT1, C19orf57, PABPC1, GET4, PIK3C2B, NOVA1, TFDP1, HIRA, PLEC, ZC3HAV1, HBEGF, GRK5, CNOT10, AGFG2, AP5Z1, MEX3A, SPO, PHLDB1, RNF168, FAM222A, C11orf30, NCLN, RMND1, KIAA0368, SGOL1, HAUS6, TMEM158, R3HCC1L, GALT, NCAPD3, CDT1, PTPN13, PLAGL1, LEMD2, CUL1, POLR2J, SPATA13, CENPN, FKBP1A, CCAR2, FZD1, DNAJA1, H2AFZ, TOR1AIP1, ATP6AP1, GPR3, HK2, RINT1, RNPS1, TICRR, RFC2, TXNL1, PPM1F, VCL, TCTN3, NCBP3, TTC39B, FKBP5, OXTR, PSMB9, PKN3, CEP152, STAMBPL1, BLMH, BANP, DDX56, USPL1, SMC6, COPS3, NCAPG2, RRM1, ADSS, ZNF546, SENP1, SBF1, MUM1, CAMKK1, KDELR3, ZNF507, TRERF1, ARL14EP, COBLL1, NCAM1, IPPK, TMEM74B, HSD3B7, FAM208A, YWHAQ, NAF1, KHNYN, PPP1R7, TRIB2, DDI2, RPRD2, GOLGA1, TBC1D24, COL4A1, PSMF1, CLTC, BIRC6, DTNB, ALAD, CDC123, ATP10A, NDUFAF2, MAT2B, BRAT1, COL6A3, C15orf41, INTU, KBTBD8, FADS1, CCNC, ZBTB49, NGF, RAD9B, NELFE, PDP2, HINT1, MAN2C1, POLR2A, FXN, USP47, DSCR3, RPAIN, SLC25A4, MRPS12, PFKP, TCF7L1, TSHZ3, FAF1, HMG20B, TTC7A, MTRF1L, H2AFV, TEX9, DDHD2, NIPA2, WDR90, PCBP1, RALGAPB, WDR20, SLC35C1, ZFYVE1, ZC3H12C, ZNF689, CENPE, COPS6, EHD2, ATP5G3, CERS6, TUBGCP3, APPL2, YAP1, FAM118A, EEF2, C4orf32, MAN1A2, WDR81, ATE1, SYNJ2, PLEKHG2, MORC2, OGFOD2, DYNC1LI2, GTSE1, ANAPC5, ZC3H7A, ZDHHC1, FAM19A2, FRG1, ANKLE1, TMEM64, TRAPPC5, FAM188B, FANCM, DEK, FBXO7, CEP97, ARL4C, HNRNPA2B1, ODF2L, RHOT2, CDK4, CEBPD, PDS5B, CTDSPL, KIAA0754, MED28, SEPT11, NUF2, SDK1, CDKN3, TMEM209, NAA15, GINS2, MAP4, PRR14L, SOS1, ATPAF1, ALG8, CDC5L, PEMT, ESCO1, RAD21, SLC35A5, ZMYM1, DENND4A, WIPF2, SPRY1, OLFML3, LARP4B, RCCD1, LAMB2, IGHMBP2, PRPF18, UBR4, ABCF2, ATP13A3, ZSWIM8, EIF4A1, ZFHX2, BTF3L4, MSRA, UBTFF, PIL1, ID4, FOXN2, TMCC1, LRIG2, PDZD7, MEGF9, KIF1B, SLC41A3, NME2, KXD1, LMBR1L, CEBPG, LRRC57, MYC, TGFB2, ZW10, SMPD4, AHDC1, PPP3R1, AMOTL2, FIGNL1, AP5M1, SUGT1, WDR77, DPM3, CNOT6, SNRPA1, KLF11, RNF41, EIF4B, PRPF38A, ARHGAP11A, SPECC1, TEX264, LIPT2, FSTL3, KANK2, SAP30BP, DDOST, PSMD6, RFXO2, BTBD8, B3GALNT1, WDYHV1, ARIH1, GMEB2, USP32, TXN2, CDCA7L, XRCC6, ETV4, SEPT10, NDC80, RUSC2, MAD1L1, HSP90AA1, SEC31B, NCKAP5L, FZD5, SSFA2, ACTN4, SUV420H1, GEMIN7, MGST3, RBBP4, DPYSL3, NEURL4, SLC39A14, SP TSSA, ETV6, ARFRP1, TRA2A, RABEPK, DIAPH1, LYST, SPAG7, FYTDD1, NOP58, MEX3B, LCMT2, ACAD8, STX4, RPS3, ACO1, VARS, CIZ1, CNNM3, GMFB, BTBD10, P OMT2, HAUS8, RFX1, MORN1, CANX, NMT2, RPL23, NFKBIL1, AMPD2, FAIM, SH3PX2, CCDC34, SLK, FAM111A, MAPK14, RAD9A, LSM11, COX8A, ZNF451, CDKN2C, ER11, PHACTR4, KPNA1, GSTZ1, FANCB, DYNLL1, ZNF367, MTF1, HNRNPUL1, EEFSEC, CSTF2, HEY2, KIN, KMT2B, TMEM55B, MITF, PGLS, GPATCH8, NAT10, FA NCC, PLCL2, ZNF414, DONSON, IRF1, DOCK1, PCNA, INO80, RFC4, PSMB2, IRS1, CPNE8, E2F1, GLRA1, MSH5, HELB, YEATS4, SCAP, PKD2, SASS6, VCAN, SGMS1, EP300, XYLB, TRIB1, NCOA2, POLR2M, PRRX1, USP42, SLC6A17, LAMP1, E2F5, PRKCE, NAA60, MCM10, ZWILCH, PLOD3, EPG5, CWC22, TOR1AIP2, MAFK, ATXN2L, POLD1, STXB6, PCDH9, RPIA, WDR76, KIF15, ABL2, PVT1, RBM6, PRMT5, FEN1, NCOR2, DNP1, USP49, VPS52, ASH2L, POLH, RPL11, INSIG1, DPY19L4, LARS, U BXN4, EZH2, FBXO45, ADPRHL2, PMPCA, CPNE2, AIM1, RASAL2, FGFR1, PSMC4, LMNA, RANBP1, TMOD3, GSR, ABHD17C, PLEKH2, PCGF1, PTPRS, C1orf27, PFA S, PHF1, TMPO, PEX12, PAFAH1B2, KDM3B, TEAD4, VWA1, DRAP1, GABPB1, CCDC85C, GTF2F2, SLC25A29, CHPF, MARK2, MEIS2, NUP50, TAOK1, GANAB, PMF1/ PMF1-BGLAP, CIT, LTBP4, PHF21A, MAP2K7, S1PR2, MRC2, ATG10, Iet-7, BCL3, ANAPC13, LRCH1, GNAI2, KIF24, ZNF704, DYM, PANK3, PAQR4, TONSL, SMARCC1, UBC, VGF, LRR1, SNTB2, CAB39, SLC6A9, POLA1, NUP133, SMARCD2, CCNB2, EIF4A2, GPM2, CNPPD1, SECISBP2, Ewsr1, EIF3B, PRKCDP, MAP1A, DUSP11, FAM172A, AHCY, FBL, HCFC1, PIGF, CD3EAP, MSO1, RGP1, GART, DAX X, CNTRL, KAT6A, ITPR3, PRKACA, COX18, CELSR3, C3orf67, ECT2, CCDC138, CPE, FANCA, KIF20A, FLNB, IRAK1BP1, BAG6, GNA11, SERHL2, CEBPZ, MTCH1, PNR C1, HEXB, C2CD5, HIST2H3D, KPNA3, FKBP3, EP400, PMM1, GAS1, PASK, MAPK6, GREM1, IGF2R, BAK1, RPS16, CSF1, SEPHS1, CHAC1, SLC29A2, COX7A2, FBXO5 , C12orf66, TFB1M, NAV2, MPRIP, LHX2, YWHAH, CCT2, GNPAT, NUP58, HDAC10, ZFPM1, LIPT1, ECD, PPFIBP1, SMC1A, RGP4 (includes others), SOX2, CD164, TSEN15, ANXA11, ERAL1, EPHA7, OSBPL1A, STXB1, SESN3, WEE1, IFT74, POLR2H, H6PD, PTPRM, CDCA2, OSBPL8, CAND1, KIAA0907, AE BP2, HIRIP3, SLC25A10, TMEM248, UBE2I, FOXP4, ALG14, INTS10, LITAF, RND1, DDX26B, OSBPL6, KIAA0101, BARD1, CHSY1, PVRL3, MCM3AP, ZNF219, SPSB3, AL AS1, RBBP5, IQGAP1, ZFAND2A, BCL7B, NFAT5, RPL18A, STUB1, ERBB2, NAA40, VAV2, KDM4C, NDUFV1, AP3M1, IFT46, ADAM15, RACGAP1, CSRN1, SMARCD1, NFATC4, SERTAD1, SLC7A6OS, TSN, BIRC5, ALS2, UMPS, MTO1, FANCL, SLC36A4, KLF5, ZDHHC3, BORA, DDX11, F2R, MTBP, DSTN, SUV39H1, RAN, ZNF76, GTF2 E2, GHITM, DDX20, HBP1, MKI67, EIF6, Cvb5r3, RBL1, HIST1H2AB, RPS11, RAD23A, POLB, ARNT, CXorf23, CD2AP, ATP1A1, AHS1, RARA, MGAT4B, MED16, BAG5, R |

## Supplemental Table 7. General IPA functions for E2F1, E2F3A and E2F3B promoter targets

| ChIP-seq | Category                 | B-H p-value | Genes                                                                                                                                                                                                                                                                                                                                                                                                                                                                                                                                                                                                                                                                                                                                                                                                                                                                                                                                                                                                                                                                                                                                                                                                                                                                                                                                                                                                                                                                                                                                                                                                                                                                                                                                                                                                                                                                                                                                                                                                                                                                                                                                                                                                                                                                                                                                                                                                                                                                                                                                                                                                                                                                                                                                                                                                                                                                                                                                                                                                                                                                                                                                                                                                                                                                                                                                                                                                                                                                                                                                                                                                                                                                                                                                                                                                                                                                                                                                                                                                                                                                                                                                                                                                                                                                                                                                                                                                                                                                                                                                                                                                                                                                                                                                                                                                                                                                                                                                                                                                                                                                                                                                                                                                                                                                                                                                                                                                                                                                                                                                                                                                                                                                                                                                                                                                                                                                                                                                  |
|----------|--------------------------|-------------|----------------------------------------------------------------------------------------------------------------------------------------------------------------------------------------------------------------------------------------------------------------------------------------------------------------------------------------------------------------------------------------------------------------------------------------------------------------------------------------------------------------------------------------------------------------------------------------------------------------------------------------------------------------------------------------------------------------------------------------------------------------------------------------------------------------------------------------------------------------------------------------------------------------------------------------------------------------------------------------------------------------------------------------------------------------------------------------------------------------------------------------------------------------------------------------------------------------------------------------------------------------------------------------------------------------------------------------------------------------------------------------------------------------------------------------------------------------------------------------------------------------------------------------------------------------------------------------------------------------------------------------------------------------------------------------------------------------------------------------------------------------------------------------------------------------------------------------------------------------------------------------------------------------------------------------------------------------------------------------------------------------------------------------------------------------------------------------------------------------------------------------------------------------------------------------------------------------------------------------------------------------------------------------------------------------------------------------------------------------------------------------------------------------------------------------------------------------------------------------------------------------------------------------------------------------------------------------------------------------------------------------------------------------------------------------------------------------------------------------------------------------------------------------------------------------------------------------------------------------------------------------------------------------------------------------------------------------------------------------------------------------------------------------------------------------------------------------------------------------------------------------------------------------------------------------------------------------------------------------------------------------------------------------------------------------------------------------------------------------------------------------------------------------------------------------------------------------------------------------------------------------------------------------------------------------------------------------------------------------------------------------------------------------------------------------------------------------------------------------------------------------------------------------------------------------------------------------------------------------------------------------------------------------------------------------------------------------------------------------------------------------------------------------------------------------------------------------------------------------------------------------------------------------------------------------------------------------------------------------------------------------------------------------------------------------------------------------------------------------------------------------------------------------------------------------------------------------------------------------------------------------------------------------------------------------------------------------------------------------------------------------------------------------------------------------------------------------------------------------------------------------------------------------------------------------------------------------------------------------------------------------------------------------------------------------------------------------------------------------------------------------------------------------------------------------------------------------------------------------------------------------------------------------------------------------------------------------------------------------------------------------------------------------------------------------------------------------------------------------------------------------------------------------------------------------------------------------------------------------------------------------------------------------------------------------------------------------------------------------------------------------------------------------------------------------------------------------------------------------------------------------------------------------------------------------------------------------------------------------------------------------------------------------------------------------|
| E2F3B    | Gastrointestinal Disease | 9.89E-28    | TGFB1, GARS, CRADD, MARCH2, SMARCB1, ADA, SART3, ETS1, SRPR, RFC1, TMEM67, HIST1H2BM, EYA3, ALCAM, CPOX, ELMO2, PIM3, DDIT3, SLC1A5, RABL6, PTPN4, NOTCH2, BNIP1, IBTK, PCNXL3, GPC6, RNF19A, EXO1, SLC12A6, LSM14B, CDS2, KPNB1, MAD2L1, PLXDC1, AP1G1, PIGU, GMPA, SMAD3, DEPDC5, SMAP2, E2F6, CEP57, SNRPD1, MTMR2, ZWINT, ING2, PTPDC1, PHRF1, DYNC1H1, PIK3R3, YPEL5, SEC61A2, AGBL3, FAM134A, POLD2, MCCC2, ZC3H7B, FLYWCH1, GFOD2, NEDD1, ZBTB2, HDGF, IGSF8, ILKAP, PDK1, LASP1, FRA10AC1, TACC3, MEF2A, HERPUD1, SNX27, BRD3, TUBB6, PAPD7, ING1, BRPF1, HNRNPL, MCM6, ZFP62, CTGF, MRPL20, FAM20C, UBR2, HOMER3, PPP1R21, ADIPOR1, XRCC1, RNF38, SLC22A15, ZFX, RAB17, TDP2, CBFB, CCNT2, TTL5, HIPK1, DNMT1, GET4, PABP C1, PIK3C2B, NOVA1, TFDP1, HIRA, ZC3HAV1, PLEC, HBEGF, CNOT10, GRK5, AGFG2, AP5Z1, MEX3A, SPOP, RNF168, PHLDB1, FAM222A, C11orf30, NCLN, RMND1, KIAA0368, SGOL1, HAUS6, TMEM158, R3HCC1L, GALC, NCAPD3, PTPN13, PLAGL1, LEMD2, CUL1, SPATA13, CENPN, FKBP1A, CCAR2, FZD1, DNAJA1, TOR1AIP1, ATP6AP1, GPR3, HK2, RINT1, TICRR, RFC2, PPM1F, TXNL1, TCTN3, VCL, TTC39B, FKBP5, OXTR, PSMB9, PKN3, CEP152, STAMBPL1, BLMH, BANP, DDX56, USPL1, SMC6, COPS3, NCAPG2, RRM1, ADSS, ZNF546, SENP1, MUM1, SBF1, CAMKK1, KDELR3, ZNF507, ARL14EP, TRERF1, NCAM1, COBLL1, IPPK, TMEM74B, HSD3B7, FAM208A, PPP1R7, KHNYN, TRIB2, DDI2, RPRD2, GOLGA1, TBC1D24, COL4A1, PSMF1, CLTC, BIRC6, DTNB, ALAD, ATP10A, CDC123, BRAT1, COL6A3, C15orf41, INTU, KBTBD8, FADS1, ZBTB49, RAD9B, PDP2, HINT1, MAN2C1, USP47, RPAIN, SLC25A4, TCF7L1, PFKP, TSHZ3, FAF1, HMG20B, H2AFV, MTRF1L, NIPA2, WDR90, PCBP1, RALGAPB, WDR20, SLC35C1, ZC3H12C, CENPE, EHD2, ATP5G3, TUBGCP3, APPL2, YAP1, EEF2, C4orf32, MAN1A2, WDR81, SYNJ2, ATE1, PLEKHG2, MORC2, DYN C1L12, GTSE1, ANAPC5, ZC3H7A, ZDHHC1, FAM19A2, FRG1, ANKLE1, TMEM64, TRAPP5, FAM188B, FANCM, DEK, FBXO7, CEP97, ODF2L, RHOT2, HNRNPA2B1, PDS5B, CDK4, CEBPD, KIAA0754, SEPT11, NUF2, SDK1, TMEM209, NAA15, CDKN3, GINS2, MAP4, PRR14L, SOS1, ATPAF1, ALG8, CDC5L, RAD21, ESCO1, SLC35A5, ZMYM1, DENND4A, WIPF2, SPRY1, OLFML3, LARP4B, RCCD1, LAMB2, IGHMBP2, PRPF18, UBR4, ATP13A3, ABCF2, ZSWIM8, EIF4A1, ZFH2, BTFL3L4, MSRA, UBTF, PIL1, ID4, TMCC1, LRIG2, PDZD7, MEGF9, KIF1B, SLC41A3, NME2, MYC, TGFB2, SMPD4, AHDC1, AMOTL2, FIGNL1, SUGT1, DPM3, KLF11, RNF41, PRPF38A, EIF4B, SPECC1, TEX264, LIPT2, FSTL3, KANK2, SAP30BP, DDOST, PSMD6, BTBD8, B3GALNT1, ARIH1, GMEB2, CDCA7L, XRCC6, ETV4, SEPT10, RUSC2, HSP90AA1, MAD1L1, SEC31B, NCKAP5L, FZD5, SSFA2, SUV420H1, MGST3, RBBP4, DPYSL3, NEURL4, SLC39A14, ETV6, TRA2A, DIAPH1, LYST, SPAG7, FYT1D1, NOP58, MEX3B, ACAD8, LCM2, ACO1, VARS, CIZ1, CNM3, BTBD10, POMT2, MORN1, HAUS8, RFX1, CANX, RPL23, NMT2, NFKBIL1, AMPD2, CCDC34, FAIM, SH3PX2A, SLK, MAPK14, FAM111A, RAD9A, LSM11, ZNF451, CDKN2C, ERI1, PHACTR4, KPNA1, FANCB, DYNLL1, ZNF367, MTF1, EEFSEC, HNRNPUL1, CSTF2, KIN, KMT2B, TMEM55B, MITF, PGLS, GPATCH8, NAT10, FANCC, ZNF414, PLCL2, DONSON, IRF1, DOCK1, PCNA, INO80, RFC4, IRS1, CPNE8, GLRA1, E2F1, MSH5, HELB, YEATS4, SCAP, PKD2, SASS6, SGMS1, VCAN, EP300, XYLB, TRIB1, NCOA2, POLR2M, USP42, PRRX1, SLC6A17, E2F5, PRKCE, NAA60, MCM10, ZWILCH, PLOD3, EPG5, CWC22, TOR1AIP2, ATXN2L, PCDH9, STXBP6, POLD1, WDR76, KIF15, ABL2, RBM6, PRMT5, FEN1, NCOR2, USP49, VPS52, ASH2L, POLH, INSIG1, DPY19L4, LARS, UBXN4, EZH2, FBXO45, ADPRHL2, PMPCA, CPNE2, AIM1, RASAL2, FGFR1, LMNA, RANBP1, TMOD3, GSR, ABHD17C, PLEKHH2, PCGF1, PTPRS, C1orf27, PFAS, PHF1, TMPO, PEX12, TEAD4, KDM3B, VWA1, DRAP1, GABPB1, CCDC85C, SLC25A29, GTF2F2, CHPF, MARK2, MEIS2, TAOK1, GANAB, CIT, LTBP4, PHF21A, MAP2K7, S1PR2, ATG10, MRC2, IET7, LRCH1, GNAI2, KIF24, ZNF704, DYM, PANK3, PAQR4, SMARCC1, TONSL, VGF, UBC, LRR1, SNTB2, CAB39, POLA1, NUP133, CCNB2, EIF4A2, GPSM2, SECISBP2, EIF3B, PRKCDP, DUSP11, MAP1A, FAM172A, AHCY, HCF1, RGP1, GART, DAXX, CNTRL, KAT6A, ITPR3, PRKACA, COX18, CELSR3, C3orf67, CCDC138, ECT2, CPE, FANCA, KIF20A, FLNB, IRAK1BP1, BAG6, GNA11, CEBPZ, MTCH1, PNRC1, HEXB, C2CD5, KPNA3, EP400, PMM1, PASK, MAPK6, GREM1, IGF2R, BAK1, CSF1, SEPHS1, CHAC1, COX7A2, FBXO5, C12orf66, TFB1M, NAV2, MPRIP, LHX2, YWHAH, GNPAT, CCT2, NUP58, ZFPM1, HDAC10, LIPT1, ECD, PPFIBP1, RGPD4 (includes others), SMC1A, SOX2, TSEN15, ANXA11, ERAL1, EPHA7, OSBPL1A, STXBP1, SESN3, WEE1, IFT74, H6PD, CDCA2, PTPRM, OSBPL8, KIAA0907, HIRIP3, SLC25A10, TMEM248, FOXP4, INTS10, DDX26B, OSBPL6, KIAA0101, BARD1, CHSY1, PVRL3, MCM3AP, ZNF219, RBBP5, ALAS1, IQGAP1, ZFAND2A, NFAT5, BCL7B, RPL18A, ERBB2, VAV2, NAA40, KDM4C, NDUFV1, AP3M1, ADAM15, IFT46, NFATC4, SERTAD1, TSN, SLC7A6OS, ALS2, UMPS, MTO1, BIRC5, FANCL, SLC36A4, KLF5, ZDHHC3, BORA, DDX11, F2R, MTBP, DSTN, SUV39H1, RAN, GHITM, GTF2E2, DDX20, MKI67, HBP1, RBL1, POLB, RAD23A, ARNT, CXorf23, ATP1A1, CD2AP, AHS1, RARA, MGAT4B, MED16, BAG5, RTEL1, CNOT1, PTPRG, ANGPTL6, C1orf74, YWHAZ, SPG7, MTF2, CKAP2, MON2, SCRT1, ADAR, MED12, PHF12, FARSA, UBE2G2, ARHGAP5, MNT, PWWP2A, AAAS, MYO9A, CDAN1, DNAJC14, CPSF3L, TFPI1, CLCC1, SQLE, FYN, OSR2, MAP2, CEP78, USP53, CRTAP, ARHGEF7, TTL4, POLQ, STRA13, HMGB2, BRD9, NAA35, KANSL3, AAMP, CRLF2, MRPL39, EIF4G1, EAF1, SF3B3, ATAD5, CDH11, TIGD5, EIF4EBP1, AKAP11, STOM, KAT2B, CREB1, RAB33B, MYO1D, NUP205, XPO4, GNB1L, PMS2, SUZ12, KHK, ELL, SPC25, POLE, PAICS, TIAL1, MDM2, MAGEB1, SCAF11, NHLRC2, CDK1, GLTP, SPIDR, INTS6, CTNBL1, CHRAC1, ATL2, CIRBP, REV1, H2AFY, ZNF184, UBN1, SAAL1, CAP1, HOXB9, BTBD7, NAB2, WDR48, FARP1, ARF1, VPRBP, PRMT3, UNC5B, PIGQ, ZNF609, DICER1, CAMK2D, SCARB1, TTL12, FASN, CDCA3, HIST1H3J, TMUB2, ABLIM2, FOSL2, STX11, SOX4, MCM5, HK1, P4HB, TRIOBP, POLE2, XYLT1, CCDC155, MUT, SIX5, GPAA1, PREP, CTDP1, TMELESS, RHOA, NUAK1, RFX2, JAG1, CDK2, ARL2, GAS2, TMX4, SRM, BRD2, COPS4, SH3BP4, C5orf42, ZBTB25, EXOG, PA2G4, AGAP1, NUDT3, TLE2, ZNF180, WD |



## Supplemental Table 7. General IPA functions for E2F1, E2F3A and E2F3B promoter targets

| ChIP-seq | Category                | B-H p-value | Genes                                                                                                                                                                                                                                                                                                                                                                                                                                                                                                                                                                                                                                                                                                                                                                                                                                                                                                                                                                                                                                                                                                                                                                                                                                                                                                                                                                                                                                                                                                                                                                                                                                                                                                                                                                                                                                                                                                                                                                                                                                                                                                                                                                                                                                                                                                                                                                                                                                                                                                                                                                                                                                                                                                                                                                                                                                                                                                                                                                                                                                                                                                                                                                                                                                                                                                                                                                                                                                                                                                                                                                                                                                                                                                                                                                                                                                                                                                                                                                                                                                                                                                                                                                                                                                                                                                                                                                                                                                                                                                                                                                                                                                                                                                                                                                                                                                                                                                       |
|----------|-------------------------|-------------|-------------------------------------------------------------------------------------------------------------------------------------------------------------------------------------------------------------------------------------------------------------------------------------------------------------------------------------------------------------------------------------------------------------------------------------------------------------------------------------------------------------------------------------------------------------------------------------------------------------------------------------------------------------------------------------------------------------------------------------------------------------------------------------------------------------------------------------------------------------------------------------------------------------------------------------------------------------------------------------------------------------------------------------------------------------------------------------------------------------------------------------------------------------------------------------------------------------------------------------------------------------------------------------------------------------------------------------------------------------------------------------------------------------------------------------------------------------------------------------------------------------------------------------------------------------------------------------------------------------------------------------------------------------------------------------------------------------------------------------------------------------------------------------------------------------------------------------------------------------------------------------------------------------------------------------------------------------------------------------------------------------------------------------------------------------------------------------------------------------------------------------------------------------------------------------------------------------------------------------------------------------------------------------------------------------------------------------------------------------------------------------------------------------------------------------------------------------------------------------------------------------------------------------------------------------------------------------------------------------------------------------------------------------------------------------------------------------------------------------------------------------------------------------------------------------------------------------------------------------------------------------------------------------------------------------------------------------------------------------------------------------------------------------------------------------------------------------------------------------------------------------------------------------------------------------------------------------------------------------------------------------------------------------------------------------------------------------------------------------------------------------------------------------------------------------------------------------------------------------------------------------------------------------------------------------------------------------------------------------------------------------------------------------------------------------------------------------------------------------------------------------------------------------------------------------------------------------------------------------------------------------------------------------------------------------------------------------------------------------------------------------------------------------------------------------------------------------------------------------------------------------------------------------------------------------------------------------------------------------------------------------------------------------------------------------------------------------------------------------------------------------------------------------------------------------------------------------------------------------------------------------------------------------------------------------------------------------------------------------------------------------------------------------------------------------------------------------------------------------------------------------------------------------------------------------------------------------------------------------------------------------------------------------|
| E2F3B    | Cell Death and Survival | 2.39E-27    | <p>TGFBF1,FRMD6,ELAVL4,POR,TRIM32,CRADD,SMARCB1,ADA,ETS1,CRKL,RFC1,DCLRE1A,DVL2,EYA3,RAD18,ALCAM,CPOX,PIM3,Calm1 (includes others),DDIT3,PRDX4,PPIA,SYNM,NOTCH2,RABL6,BNIP1,RNF19A,EXO1,ATN1,SLC12A6,SDHA,PPM1M,ID3,BUB1,KPNB1,MAD2L1,AP1G1,CDKN2A,EEF1A1,SMAD3,CBX5,INTS1,E2F6,MAPK3,SNRPD1,SNN,JUND,MTMR2,ING2,RAD54L,DYNC1H1,BCL2L1,TFEB,KLF10,PIAS1,PDE4A,GPHN,PDCD10,CLIC4,EIF2S1,HDGF,SIX1,NCS1,ILKAP,PDK1,TACC3,ALKBH5,MEF2A,HERPUD1,SOD1,PPM1G,TMEM109,TUBB6,CENPI,TFCP2,E2F7,TSC22D1,ING1,SLC25A5,MAP4K4,RPLP0,AGPS,CTGF,UBR2,ADIPOR1,XRCC1,ZFX,TDP2,CBFB,HIPK1,FRS2,DNMT1,NOVA1,TFDP1,CENPB,PLEC,HBEGF,GRK5,HMGA1,Anp32b,ARHGAP35,TMEM158,SNAI2,CDT1,PTPN13,PLAGL1,CUL1,PTN,BOK,FKBP1A,CCAR2,DNAJA1,ATP6AP1,MAFG,HK2,RNPS1,RINT1,IGF1R,PPM1F,VCL,NSMCE1,FKBP5,DU,UT,PLK1,ACLY,SRXN1,F3,NCAPG2,RRM1,SENP1,SBF1,CAMKK1,GPR180,NCAM1,PRPF19,IPPK,FBXW7,DHODH,ZNF91,PBK,YWHAQ,ETS2,TRIB2,Map3k7,TFDP2,STIL,COL4A1,ACP2,BIRC6,RHOJ,SMARCD3,PALB2,BRAT1,SCRIB,CCNC,DTYMK,NGF,RAD9B,HINT1,MAN2C1,TRIM24,POLR2A,FXN,USP47,SLC25A4,ATP2C1,LRRK2,TCF7L1,TSHZ3,FAF1,SLC25A38,RAF1,RNF8,TRAI,MYH9,RDH10,HMMR,PANX1,ATP2A2,ADH5,EMG1,KLF7,GATAD2A,NUP93,CENPE,FBLN1,KLF1,CERS6,TYMS,GNE,ATG5,PHIP,ESPL1,YAP1,EEF2,OPN3,WDR81,PLEKHG2,TNPO2,ST3GAL1,TFRC,Meis1,PTPRA,ABCE1,FANCM,ERCC4,DEK,FBXO10,PTPN2,AKAP8,Dleu2,CDK4,CEBPD,CTDSPL,DUSP22,TNFAIP8L1,MED28,NUF2,CDKN3,NAA15,MAP4,UBE2K,DAB2,NFE2L2,ESCO1,RAD21,DHX9,DENND4A,HNRNPU,SPRY1,TUBGCP6,LZTS2,TPK1,ING5,SLC29A1,LAMB2,SDF2L1,CCNE1,ZFPM2,UBR4,CAPRIN2,EIF4A1,CDKN1A,EIF2B1,PSAP,UBTF,LDHA,MAP3K3,ID4,TCF7L2,CASP7,PSEN1,MAOA,CAMK1D,KIF1B,MSH3,VPS13A,PIEZO1,PIEZO1,RNASEH1,SKA1,CEBPG,MYC,TGMD6,Gm21596/Hmgb1,SMPD4,PPP3R1,XPO1,FIGNL1,DPM3,SNRPA1,KLF11,EIF4B,CLASP1,SMC3,SPECC1,FSTL3,YWHAH,KANK2,SAP30BP,SLC12A7,PSMD6,HELLS,N T5C3A,CDCA7L,TXN2,XRCC6,NDC80,HSP90AA1,PKMYT1,MAD1L1,ACTN4,PIDD1,RBBP4,DPYSL3,UBE2N,RPS6KA3,RAD50,ETV6,IGF2BP1,STIM2,RAD51,CNA2,HLA-DMA,BMPR1A,TIMP1,NOP58,RPS3,LRRC8A,GMFB,PRKCA,SLC20A1,HAUS8,SDC1,SLC12A2,CANX,HSPD1,FAIM,SH3PXD2A,SLK,MAPK14,PRKCI,FOXO1,RAD9A,PSMD2,SH3RF1,SGK1,COX8A,APIP,CDKN2C,SFPQ,RICTOR,RECQL,GSTZ1,CXCL10,VEGFA,FANCB,DYNLL1,IPMK,MTF1,HNRNPUL1,PCID2,KMT2B,MITF,RPA1,FANCC,ITPR1,GEMIN2,IRF1,TERF2,DOCK1,PCNA,YARS,IRS1,BHLHE40,E2F1,HSPB11,MSH5,LRP8,HELB,YEATS4,PHLPP1,Nos1ap,SCAP,VASH2,ASF1A,CAMK2N2,SGMS1,VCAN,CHEK1,EP300,WTA,TRIB1,NCOA2,ADK,DAP3,LAMP1,PRKCE,MCM10,MAP1LC3B,PLAT,EPG5,RPS19,TGMM20,DLX1,MCU,MAFK,SIN3A,CHMP6,SPDYA,MCM2,ABL2,PRMT5,FEN1,NCOR2,ZFP36L2,GLS2,POLH,FZR1,ANKS1B,PTPN23,VPS28,INSIG1,FNIP2,MELK,STMN1,PTK2,EZH2,SIAH2,HTRA2,GPS2,FGFR1,PSMC4,LMNA,RANBP1,TMOD3,GSR,ARRB2,FLOT2,MTDH,PML,PHF1,PAFAH1B2,GABPB1,ZBTB7A,PDGFA,ETF2F2,Pc nt,MARK2,TAOK1,ING4,Ppp1cc,SP1,MANF,CIT,RABGGTB,DTL,MAP2K7,S1PR2,ATG10,SMAD7,let-7,RPS6KA5,BCL3,FAU,GNAI2,ENO1,B4GALT1,SLC25A27,TONSL,SMARCC1,VGF,HMGCR,UBC,SHMT2,BCL2L11,WNT5A,LGALS1,MCM7,NPM1,mir-130,CTCF,PRKAB1,TAB2,Ewsr1,EIF3B,PRKCDBP,VAMP3,TCERG1,MOB1A,FBL,SLC2A1,STK25,TCF3,DAXX,ITPR3,PRKACA,ECT2,FANCA,FLNB,NRG2,PRDX1,BAG6,GNA11,MTCH1,TTK,HEXB,EP400,KHDRBS1,GAS1,GREM1,KAT5,IGF2R,BAK1,TMEM107,MSH2,CSF1,SLC29A2,FBXO5,TFB1M,ACTL6A,SOCS3,MPRIP,PCDH18,SEPT9,YWHAH,LHX2,CCT2,NUP58,RNF7,SMC1A,RGPD4 (includes others),SOX2,INTS3,USP8,CD164,ANXA11,GPX4,WDR4,EPHA7,STXBP1,HDAC2,WEE1,IFT74,RDX,H6PD,PFDN5,PTPRM,CDCA2,TXNRD1,GINS1,SLC25A10,UBE2I,PEBP1,KIAA0101,BARD1,CHSY1,INPPL1,IQGAP1,E2F3,PTGES3,NFAT5,STUB1,ERBB2,VAV2,ADAM15,RACGAP1,SMARCE1,CSRNP1,SMARCD1,NFATC4,ALS2,BIRC5,FANCL,KLF5,BRCA2,DDX11,CCP110,MTBP,F2R,SUV39H1,RAN,DDX20,MKI67,Cyb5r3,RBL1,EIF6,POLB,ARNT,CD2AP,ATP1A1,AHSA1,RARA,LEPROT,AFAP1,BAG5,PTPRG,YWHAZ,MDC1,SPG7,CKAP2,ADAR,RNASEH2A,CMIP,MNT,AHI1,CREM,FYN,ARHGEF7,NAA35,HMGB2,EIF4G1,SF3B3,XRCC4,CDH11,EIF4EBP1,STOM,KAT2B,CREB1,NUP205,WSB1,PMS2,SUZ12,PIIF,KHK,SPC25,ELL,TIAL1,MDM2,SLIT2,C1orf159,CDK1,SPIDR,CTNBL1,IMMT,REV1,CIRBP,ZNF184,HOXB9,WDR48,VTI1A,VPRBP,UNC5B,DCICER1,METAP2,CAMK2D,SCARB1,STAG1,FASN,ITPRIP,FOSL2,BCKDK,STX11,SOX4,HK1,P4HB,CNOT11,DDX19A,RAC1,PREP,Cdc42,RHOA,USE1,NUAK1,TBCCD1,CYLD,JAG1,CDK2,KDM3A,GAS2,BRD2,EXOG,PA2G4,SRRT,GADD45G,SCARB2,SET, UHRF2,Pgap2,GMNN,ZNF280B,IFRD1,NCL,MAPKAPK2,ATG16L1,RHBDD3,RASSF1,HSPG2,UHRF1,HAT1,PHLDA3,HSPH1,GLS,AVPI1,PRMT1,PIAS3,NT5M,ACAT1,NFIB,PSMC3,LANCL2,MSN,CASP8AP2,MINPP1,PRKAB2,KRAS,RBM3,CCND1,CDIP1,PKN2,EGR2,FHL2,RBM4B,SUMO1,NEK6,ATF4,RUVBL2,ADORA2B,HIPK2,UNG,PIGT,FBXO9,TP53,UBE2Q1,RRM2,ANO6,TPM3,TBK1,KLF13,DDR1,ATF2,SKP2,HSPA8,CLK2,BTG2,INVS,GAPDH,XRCC5,PRDX2,TRIM33,PSEN2,MMS22L,SPAG5,APPL1,ARF6,CD47,ZC3H8,TRIM27,ALMS1,DIS3,ATP7B,CUL7,HSPA2,PLA2G4A,NR4A2,SGCD,AKAP1,SRSF2,ILF3,ATP2B1,GNB2L1,PARP2,KLF6,POLR3E,TCEB1,HSPA4,FDFT1,MAP2K2,PIM1,MYBL2,CHTF18,GCLM,BRIP1,ULK2,PPP1R15B,SCYL3,ITGB3BP,BCAS2,UBE4B,DIDO1,WASF1,BUB1B,ATAD2,KMT2A.SLC3A2.PFKM.PIAS4.TFAM.TRIM39.DUSP1.AGAP3.CAPN2.ELMO1.CDKL3.RPSA.RUNX1.TNFAIP8.MOB3A.ARID1A.PPIB.ATF6.SMA</p> |

## Supplemental Table 7. General IPA functions for E2F1, E2F3A and E2F3B promoter targets

| ChIP-seq | Category             | B-H p-value | Genes                                                                                                                                                                                                                                                                                                                                                                                                                                                                                                                                                                                                                                                                                                                                                                                                                                                                                                                                                                                                                                                                                                                                                                                                                                                                                                                                                                                                                                                                                                                                                                                                                                                                                                                                                                                                                                                                                                                                                                                                                                                                                                                                                                                                                                                                                                                                                                                                                                                                                                                                                                                                                                                                                                                                                                                                                                                                                                                                                                                                                                                                                                                                                                                                                                                                                                                                                                                                                                                                                                                                                                                                                                                                                                                                                                                                                                                                                                                                                                                                                                                                                                                                                                                                                                                                                                                                                                                                                                                                                                                                                                                                                                                                                                                                                                                                                                                                                                                                                                                                                                                                                                                                                                                                                                                                                                                                                                                                                                                                                                                                                                                                                                                                            |
|----------|----------------------|-------------|----------------------------------------------------------------------------------------------------------------------------------------------------------------------------------------------------------------------------------------------------------------------------------------------------------------------------------------------------------------------------------------------------------------------------------------------------------------------------------------------------------------------------------------------------------------------------------------------------------------------------------------------------------------------------------------------------------------------------------------------------------------------------------------------------------------------------------------------------------------------------------------------------------------------------------------------------------------------------------------------------------------------------------------------------------------------------------------------------------------------------------------------------------------------------------------------------------------------------------------------------------------------------------------------------------------------------------------------------------------------------------------------------------------------------------------------------------------------------------------------------------------------------------------------------------------------------------------------------------------------------------------------------------------------------------------------------------------------------------------------------------------------------------------------------------------------------------------------------------------------------------------------------------------------------------------------------------------------------------------------------------------------------------------------------------------------------------------------------------------------------------------------------------------------------------------------------------------------------------------------------------------------------------------------------------------------------------------------------------------------------------------------------------------------------------------------------------------------------------------------------------------------------------------------------------------------------------------------------------------------------------------------------------------------------------------------------------------------------------------------------------------------------------------------------------------------------------------------------------------------------------------------------------------------------------------------------------------------------------------------------------------------------------------------------------------------------------------------------------------------------------------------------------------------------------------------------------------------------------------------------------------------------------------------------------------------------------------------------------------------------------------------------------------------------------------------------------------------------------------------------------------------------------------------------------------------------------------------------------------------------------------------------------------------------------------------------------------------------------------------------------------------------------------------------------------------------------------------------------------------------------------------------------------------------------------------------------------------------------------------------------------------------------------------------------------------------------------------------------------------------------------------------------------------------------------------------------------------------------------------------------------------------------------------------------------------------------------------------------------------------------------------------------------------------------------------------------------------------------------------------------------------------------------------------------------------------------------------------------------------------------------------------------------------------------------------------------------------------------------------------------------------------------------------------------------------------------------------------------------------------------------------------------------------------------------------------------------------------------------------------------------------------------------------------------------------------------------------------------------------------------------------------------------------------------------------------------------------------------------------------------------------------------------------------------------------------------------------------------------------------------------------------------------------------------------------------------------------------------------------------------------------------------------------------------------------------------------------------------------------------------------------------------------------------------|
| E2F3B    | Cellular Development | 5.01E-24    | TGFBR1, TLE1, FRMD6, ELAVL4, POR, TRIM32, SMARCB1, ADA, RRAGC, ETS1, CCNE2, PEAK1, CRKL, RFC1, TMEM67, ZBTB5, DVL2, ALCAM, ELMO2, MORC3, PIM3, DDIT3, BEND6, SLC1A5, PRDX4, PPIA, SYNM, RABL6, NOTCH2, TIPARP, ATN1, SLC12A6, IPO7, ID3, BUB1, PIR, CDKN2A, EEF1A1, SMAD3, CBX5, MAPK3, JUN, ESCO2, KCNAB2, GNAZ, PIK3R3, DYNC1H1, BCL2L1, H3F3A/H3F3B, CBX3, SUMO3, KLF10, RAB23, PIAS1, RNASEH2B, PDE4A, CSRP1, GPHN, CLIC4, PDCD10, ZBTB24, HDGF, SIX1, ILKAP, TACC3, MEF2A, SOD1, MORF4L1, RPS15, E2F7, TSC22D1, ING1, BRPF1, SLC25A5, MAP4K4, EFEMP2, HNRNPL, ASPSCR1, CTGF, FAM20C, UBR2, FNDC3B, RRAGB, RASGRF1, CTDSP1, RAB17, CBFB, CCNT2, HIPK1, FRS2, DNMT1, RND2, GET4, PIK3C2B, Irf5, TFDP1, CENPB, HIRA, HBEGF, SYNCRIP, GRK5, HMG1, SH3GL1, SUCO, SNAI2, CDT1, PTPN13, LEMD2, PLAGL1, PTN, CUL1, FZD1, ATP6AP1, H2AFZ, MAFG, GPR3, NEIL3, HK2, IGF1R, DAGLB, VCL, FKBP5, EED, OXTR, BANP, PLK1, ACLY, COPS3, F3, RRM1, SENP1, SBF1, RNF187, GCAT, NCAM1, ARL2BP, PRPF19, CAV2, TBX15, FBXW7, PBK, YWHAQ, ETS2, TRIB2, Map3k7, AAGAB, TBC1D24, COL4A1, CLTC, BIRC6, RHOJ, NDUFAF2, MAT2B, SMARCD3, COL6A3, INTU, RCE1, HDGFRP3, CDK5RAP2, NGF, ZMIZ1, NELFE, HINT1, TRIM24, FXN, USP47, ATP2C1, ANKRD54, LRRK2, TMEM14C, TCF7L1, PFKP, NCAPH2, TSHZ3, MLLT1, FAF1, SLC25A38, HMG20B, TTC7A, RAF1, TRAI, MYH9, PCBP1, RDH10, HMMR, PANX1, ATP2A2, NKAP, ADH5, KLF7, FBLN1, COPS6, TGIF2, KLF1, TYMS, GNE, ATG5, PHIP, PAPD4, ESPL1, PAM, YAP1, EEF2, CDCA4, PEX2, TFRC, Meis1, TMEM64, PTPRA, SPPL2A, DEK, PLXNA3, PTPN2, WDR61, HNRNPA2B1, EEF1B2, PDS5B, CEBPD, CDK4, CTDSPL, SEPT11, MED28, COPS8, SDK1, CDKN3, SOS1, DAB2, NF-E2L2, PEMT, RAD21, DHX9, HNRNPU, SPRY1, LZTS2, LAMB2, CCNE1, ZFPM2, CDKN1A, EIF4A1, EIF2B1, PSAP, LDHA, UBTF, PPI1, MAP3K3, TCF7L2, CASP7, ID4, PSEN1, MAOA, RPL22, NCDN, MSH3, NME2, TLN1, ABC10, MYC, TGFBR2, Gm21596/Hmgb1, AMOTL2, PPP3R1, FIGNL1, Hmga2, XPO1, SUGT1, RNF41, EIF4B, SMC3, FSTL3, PNN, HELLS, SNX3, TUSC3, TBL1X, ARIH1, NT5C3A, HNRNPAB, XRCC6, ETV4, RECQL4, HSP90AA1, MAD1L1, FZD5, ACTN4, FAM83D, SUV420H1, DPYSL3, RPS6KA3, IGF2BP1, ETV6, STIM2, RAD51, TRA2A, CCNA2, DIAPH1, AHNK, HLA-DMA, TIMP1, BMP1R1A, NOP58, CIZ1, LRRC8A, PRKCA, SDC1, RFX1, AP1S2, SLC12A2, HSPD1, SH3PXD2A, FAIM, PRKCI, MAPK14, FOXO1, PHF19, RAD9A, SGK1, ZNF451, SFPQ, CDKN2C, RICTOR, Rpl29 (includes others), RECQL, VEGFA, CXCL10, DYNLL1, CSTF2, PCID2, HEY2, KIN, KMT2B, MITF, CNOT6L, RPA1, PLCL2, FANCC, ITPR1, IRF1, GEMIN2, TERF2, DOCK1, PCNA, PA-TZ1, RFC4, BHLHE40, IRS1, E2F1, RGL2, LRP8, YEATS4, PHLPP1, VASH2, ASF1A, CAMK2N2, FNTB, SP2, VCAN, SGMS1, TAX1BP3, EP300, CHEK1, TRIB1, ADK, LAMP1, E2F5, PRKCE, LPP, PLAT, RPS19, DLX1, CINP, MAFK, SIN3A, SPDYA, ABL2, MCM2, PRMT5, KCTD5, ADAM10, GABPA, FEN1, NCOR2, ZFP36L2, NPC2, POLH, FZR1, EPS15, VPS28, INSI1, MELK, STMN1, PTK2, MBNL3, EZH2, NIPBL, SIAH2, ARHGEF25, MYO10, GSP2, FGFR1, RAB8A, LMNA, ELF1, CORO1B, PTPRS, MTDH, PML, PHF1, RFC3, TEAD4, KDM3B, PKNOX1, ZBTB7A, PDGFA, MARK2, MEIS2, TMEM120A, ING4, FUT8, Ppp1cc, SP1, VGLL3, CIT, MANF, RBM15, LTBP4, NFYB, DTL, MAP2K7, S1PR2, CKS2, MRC2, ATG10, Nedd4, SMAD7, let-7, RPS6KA5, BCL3, GNAI2, ENO1, SLC25A27, PAQR4, UBC, HMGC, VGF, BCL2L11, MCM7, WNT5A, LGALS1, NPM1, mir-130, CTCF, TAB2, CCNB2, SSBP2, GPM2, Ewsr1, EIF3B, PLXNB2, AHCY, FBL, SLC2A1, PIGF, TCF3, SP4, DAXX, KAT6A, PRKACA, ECT2, FANCA, KIF20A, FLNB, NRG2, EIF4EBP2, BAG6, GNA11, EP400, KHDRBS1, GAS1, ZNF521, MAPK6, GREM1, KAT5, IGF2R, BAK1, AGPAT5, MSH2, CSF1, KIF23, SOCS3, MPRIP, SEPT9, LHX2, RNF7, ZFPM1, RPGRIP1L, SMC1A, SOX2, USP8, CD164, ERAL1, HDAC2, PFDN5, CDCA2, PTPRM, TXNRD1, OSBPL8, CAND1, SF3B4, UBE2I, PBRM1, PEBP1, LITAF, RND1, KIAA0101, BARD1, IQGAP1, E2F3, PTGES3, STUB1, ERBB2, KDM4C, ADAM15, RACGAP1, SMARCE1, NFATC4, SERTAD1, TSN, SLC7A6OS, BIRC5, ALS2, KLF5, CKS1B, BRCA2, F2R, MTBP, SUV39H1, RAN, HBP1, MKI67, RBL1, EIF6, RPS11, RAD23A, ARNT, POLB, AHS1, RARA, AFAP1, CNOT1, PTPRG, YWHAZ, MTF2, ADAR, MED12, ANKRD26, CMIP, MNT, ARHGAP5, SSBP1, CREM, ME2, FYN, OSR2, MAP2, ARHGEF7, TTL4, STRA13, HMGB2, NAA35, CRLF2, EIF4G1, CDH11, XRCC4, EIF4EBP1, KAT2B, CREB1, WSB1, PMS2, SUZ12, PPIF, HDGFRP2, ELL, MDM2, NAP1L1, SLIT2, CBLN1, CDK1, CCDC85B, RNF144A, IMMT, H2AFY, CIRBP, UBN1, HOXB9, BTBD7, NAB2, WDR48, FARP1, VTI1A, VPRBP, ARF1, Wasl, UNC5B, DICER1, AMD1, HIST1H4A, HIST1H4C, CAMK2D, SCARB1, STAG1, FASN, HIST1H4I, HIST1H4J, FOSL2, HK1, SOX4, DTNBP1, RAC1, OSTM1, HERC2, PREP, NASP, Cdc42, SH2B3, RHOA, NUA1, SBNO2, CYLD, SPTAN1, JAG1, CDK2, TMT3, ZFAT, COPS4, SRM, SPRED1, PA2G4, GADD45G, TXLNA, KMT2C, Cux1, SET, UHRF2, PPP1R12A, GMNN, SIPA1, GTPBP4, IFRD1, NCL, MAPKAPK2, RASSF1, EMILIN1, HSPG2, OGRF, MYCBP, UHRF1, HAT1, GLS, DOCK7, MTAP, EDF1, C19orf68, PRMT1, PIAS3, ACAT1, NFIB, CBFA2T2, ADAM9, RMI1, MINPP1, RBM3, KRAS, CCND1, ADRB3, PKN2, EGR2, BOP1, FHL2, KIF13A, SUMO1, BAIAP2, ATF4, ADORA2B, CDC16, HIPK2, PIGT, FBXO9, TP53, CSNK1D, RRM2, USP19, TPM3, KLF13, PTP4A1, RBM4, DDR1, SKP2, ATF2, MICU1, EIF4H, CCNF, FSCN1, BTG2, GAPDH, SRSF4, XRCC5, PRDX2, RAP2A, PRPF3, GALNT2, GPC2, PSEN2, ALX1, KISS1R, B4GALT7, ARF6, CD47, TRIM27, ALMS1, CSNK2B, KIF2C, STT3B, MEMO1, CUL7, POLG, TOB1, HSPA2, FRK, PLA2G4A, NR4A2, SHMT1, DLGAP5, SRSF2, ILF3, RASA3, PARP2, GNB2L1, KLF6, POLR3E, SART1, LEMD3, FDF1, HSPA4, TNRC6C, MAP2K2, PIM1, MYBL2, TAB1, ULK2, PGK1, UBE4B, IER2, DIDO1, POFUT1, ATAD2, KMT2A, SLC3A2, METRN, TFAM, CBX1, ATP5B, TRIM39, DUSP1, LMNB2, DIXDC1, HELT, ELMO1, EEA1, TNFAIP8, RUNX1, NMT1, ARID1A, GTF2I, HIST2H4B, ATF6, SMAD5, MLH1, CDCA7, MIER1, FANCD2, NET1, LDB1. |

## Supplemental Table 7. General IPA functions for E2F1, E2F3A and E2F3B promoter targets

| ChIP-seq | Category                                   | B-H p-value | Genes                                                                                                                                                                                                                                                                                                                                                                                                                                                                                                                                                                                                                                                                                                                                                                                                                                                                                                                                                                                                                                                                                                                                                                                                                                                                                                                                                                                                                                                                                                                                                                                                                                                                                                                                                                                                                                                                                                                                                                                                                                                                                                                                                                                                                                                                                                                                                                                                                                                                                                    |
|----------|--------------------------------------------|-------------|----------------------------------------------------------------------------------------------------------------------------------------------------------------------------------------------------------------------------------------------------------------------------------------------------------------------------------------------------------------------------------------------------------------------------------------------------------------------------------------------------------------------------------------------------------------------------------------------------------------------------------------------------------------------------------------------------------------------------------------------------------------------------------------------------------------------------------------------------------------------------------------------------------------------------------------------------------------------------------------------------------------------------------------------------------------------------------------------------------------------------------------------------------------------------------------------------------------------------------------------------------------------------------------------------------------------------------------------------------------------------------------------------------------------------------------------------------------------------------------------------------------------------------------------------------------------------------------------------------------------------------------------------------------------------------------------------------------------------------------------------------------------------------------------------------------------------------------------------------------------------------------------------------------------------------------------------------------------------------------------------------------------------------------------------------------------------------------------------------------------------------------------------------------------------------------------------------------------------------------------------------------------------------------------------------------------------------------------------------------------------------------------------------------------------------------------------------------------------------------------------------|
| E2F3B    | Connective Tissue Development and Function | 5.01E-24    | RAF1,NPM1,TRAIP,MINPP1,TGFBR1,HMMR,RBM3,KRAS,FRMD6,CCND1,TRIM32,Ewsr1,BOP1,EGR2,EIF3B,SUMO1,SMARCB1,FBLN1,ATF4,HIPK2,UNG,AH CY,TP53,ATG5,ESPL1,SLC2A1,YAP1,TMEM201,TPM3,RFC1,KLF13,TCF3,SKP2,PEX2,KAT6A,CCNF,BTG2,RAD18,PRKACA,TFRC,PTPRA,XRCC5,FANCA,PR DX2,MORC3,RAP2A,FLNB,PIM3,DDIT3,PTPN2,PRDX1,SNX17,PRDX4,CEBPD,CDK4,B4GALT7,APPL1,MAP4,CD47,SOS1,CSNK2B,NFE2L2,DHX9,SLC12A6,A TP7B,EP400,SPRY1,KHDRBS1,GAS1,CUL7,MAPK6,TOB1,LZTS2,KAT5,IGF2R,ID3,BAK1,BUB1,CCNE1,MSH2,CSF1,CDKN1A,SHMT1,UBTF,PPIL1,CASP7,AC TL6A,PSEN1,CDKN2A,SOCS3,LHX2,SMAD3,PARP2,GNB2L1,KLF6,ABCC10,TGFBR2,MYC,E2F6,USP8,Gm21596/Hmgbl1,PIM1,MAPK3,MYBL2,JUND,PPP1R1 5B,TAB1,PGK1,SMC3,SYNE2,HDAC2,DIDO1,PFDN5,HELLS,BUB1B,KMT2A,PFKM,SLC3A2,BCL2L1,DUSP1,RECQL4,XRCC6,MAD1L1,SUV420H1,PBRM1,RU NX1,TNFAIP8,ARID1A,KIAA0101,GTF2I,PIAS1,RPS6KA3,RNASEH2B,SMAD5,E2F3,ETV6,MLH1,PTGES3,RAD50,HDGF,CCNA2,SIX1,AHNAK,FANCD2,STUB1 ,TIMP1,NOP58,STEAP2,FOXO3,ERBB2,CIZ1,MCM9,PRKCA,SLC20A1,SOD1,TSN,SERTAD1,FOXM1,BIRC5,MORF4L1,NBN,IVNS1ABP,MAPK14,FOXO1,RAD9 A,TFCP2,KLF5,E2F7,CKS1B,BRCA2,TSC22D1,ATR,WISP1,BRPF1,ING1,WNK1,DPY30,SOCS1,ASPSCR1,CTGF,F2R,MTBP,ITSN1,SUV39H1,CDC7,CDKN2C, SFPQ, FNDC3B, RBL1, EIF6, RICTOR, Rpl29 (includes others), RECQL, POLB, VEGFA, CXCL10, RASGRF1, RARA, CSTF2, CFBF, IRS2, TXN, FRS2, TIMP2, TFDP1, NDRG1, MITF, COPS5, PLEC, CNOT6L, HBEGF, CKAP2, G RK5, FANCC, HMGA1, IRF1, TERF2, MNT, SH3GL1, PATZ1, GAB1, IRS1, STIP1, MBD4, E2F1, ME2, ARHGAP35, SAC3D1, CYR61, FYN, CTC1, ARHGEF7, TTL4, CUL1, H MGN1, SETX, RCHY1, FNTB, SP2, VCAN, XRCC4, CHEK1, EP300, ID1, YY1, CREB1, E2F5, EIF3A, CEBPA, RHOA, PDGFRA, IGF1R, BID, PRKCE, RASSF5, VCL, LPP, PO T1, PLAT, RPS19, MYCN, PMS2, DCK, SUZ12, PPIF, TBX3, HDGFRP2, ACTB, CDC6, MDM2, MAFK, SIN3A, KITLG, FADD, DGKZ, SENP1, ABL2, REV1, SBF1, CIRBP, KIF2 0B, SPRY2, RNF187, ADD1, TBPL1, FEN1, IREB2, ZFP36L2, DYRK1A, POLH, FZR1, MCM8, PRPF19, PALLD, TFG, MAPK1, VPRBP, DIAPH3, Wasl, FBXW7, DICER1, LAT S2, AMD1, LMNB1, FGFR3, STMN1, PTK2, SRSF1, SCARB1, STAG1, FASN, EZH2, FOSL2, BRCA1, STX11, CDC25A, STK11, FGFR1, CLTC, RAC1, LMNA, TMOD3, SSRP 1, TOB2, Cdc42, PKD1, SH2B3, RHOA, LIN9, GNL3, RCE1, TMPO, VDAC1, JAG1, PML, CDK2, GDNF, PA2G4, PICALM, GADD45G, PDGFA, ABL1, SLC7A1, NGF, BCAR1, K MT2C, PRKAG1, ZMIZ1, TRIM24, HINT1, SIPA1, GTPBP4, ERF, MAPKAPK2, BLM, RASSF1, MAP2K7, CKS2, S1PR2, HAT1, MRC2, HDAC1, Iet- 7, SMAD7, MAPK9, PRMT1, GNAI2, RIPK1, B4GALT1, LPAR1, ACAT1, EIF2AK2, SHMT2, WNT5A |

## Supplemental Table 7. General IPA functions for E2F1, E2F3A and E2F3B promoter targets

| ChIP-seq | Category                           | B-H p-value | Genes                                                                                                                                                                                                                                                                                                                                                                                                                                                                                                                                                                                                                                                                                                                                                                                                                                                                                                                                                                                                                                                                                                                                                                                                                                                                                                                                                                                                                                                                                                                                                                                                                                                                                                                                                                                                                                                                                                                                                                                                                                                                                                                                                                                                                                                                                                                                                                                                                                                                                                                                                                                                                                                                                                                                                                                                                                                                                                                                                                                                                                                                                                                                                                                                                                                                                                                                                                                                                                                                                                                                                                                                                                                                                                                                                                                                                                                                                                                                                                                                                                                                                                                                                                                                                                                                                                                                                                                                                                                                                                                                                            |
|----------|------------------------------------|-------------|------------------------------------------------------------------------------------------------------------------------------------------------------------------------------------------------------------------------------------------------------------------------------------------------------------------------------------------------------------------------------------------------------------------------------------------------------------------------------------------------------------------------------------------------------------------------------------------------------------------------------------------------------------------------------------------------------------------------------------------------------------------------------------------------------------------------------------------------------------------------------------------------------------------------------------------------------------------------------------------------------------------------------------------------------------------------------------------------------------------------------------------------------------------------------------------------------------------------------------------------------------------------------------------------------------------------------------------------------------------------------------------------------------------------------------------------------------------------------------------------------------------------------------------------------------------------------------------------------------------------------------------------------------------------------------------------------------------------------------------------------------------------------------------------------------------------------------------------------------------------------------------------------------------------------------------------------------------------------------------------------------------------------------------------------------------------------------------------------------------------------------------------------------------------------------------------------------------------------------------------------------------------------------------------------------------------------------------------------------------------------------------------------------------------------------------------------------------------------------------------------------------------------------------------------------------------------------------------------------------------------------------------------------------------------------------------------------------------------------------------------------------------------------------------------------------------------------------------------------------------------------------------------------------------------------------------------------------------------------------------------------------------------------------------------------------------------------------------------------------------------------------------------------------------------------------------------------------------------------------------------------------------------------------------------------------------------------------------------------------------------------------------------------------------------------------------------------------------------------------------------------------------------------------------------------------------------------------------------------------------------------------------------------------------------------------------------------------------------------------------------------------------------------------------------------------------------------------------------------------------------------------------------------------------------------------------------------------------------------------------------------------------------------------------------------------------------------------------------------------------------------------------------------------------------------------------------------------------------------------------------------------------------------------------------------------------------------------------------------------------------------------------------------------------------------------------------------------------------------------------------------------------------------------------------------------|
| E2F3B    | Cellular Assembly and Organization | 7.18E-24    | NPM1,KIF13B,TGFBFR1,CTCF,RAB2A,POLA1,NUP133,SMARCD2,CCNB2,ELAVL4,GPSM2,TMEM231,GORASP2,SMARCB1,PRKCDBP,MAP1A,PLXNB2,CENPW,ETS1,HCFC1,CRKL,STK25,NUP107,TMEM67,DCLRE1A,SP4,DAXX,DVL2,KAT6A,RAD18,PRKACA,CELSR3,ELMO2,ECT2,FLNB,EIF4EBP2,BAG6,GNA11,TKTK,SYNM,PELO,BNIP1,HEXB,RNF19A,ATN1,EXO1,BBIP1,GREM1,KAT5,BUB1,KPNB1,MAD2L1,TMEM107,CSF1,FBXO5,AP1G1,ACTL6A,CDKN2A,KIF23,SOC3,EEF1A1,MPRIP,YWHAH,LHX2,SEPT9,SMAD3,RPGRIP1L,SMC1A,USP8,CEP57,TPPP,MAPK3,ARHGAP20,ZWINT,GPX4,ESCO2,EPHA7,HDAC2,WEE1,IFT74,DNA2,RDX,RAD54L,MAPKAPK5,Afg3l1,NDC1,CDCA2,PTPDC1,PTPRM,TXNRD1,BCL2L1,H3F3A/H3F3B,CEP76,HIRIP3,CBX3,UBE2I,PBRM1,HPS5,TFEB,RND1,KIZ,KIAA0101,RAB23,SKA2,BARD1,PVRL3,PDE4A,NEDD1,CSR1,INPPL1,GPHN,IQGAP1,PHLDB2,PTGES3,HDGF,STUB1,ERBB2,LASP1,VAV2,TACC3,IFT46,RACGAP1,SMARCE1,MEF2A,SMARCD1,NFATC4,SOD1,SERTAD1,BIRC5,ALS2,MORF4L1,KLF5,PAPD7,BRCA2,BORA,ING1,SLC25A5,DDX11,CCP110,CTGF,RAB5C,F2R,MTBP,DSTN,SUV39H1,RAN,HBP1,Cyb5r3,RBL1,CD2AP,RASGRF1,RARA,TDP2,RAB17,CBFB,AFAP1,SPECC1L,BAG5,RTEL1,DNMT1,RND2,TFDP1,SEPT7,YWHAZ,PLEC,SPG7,GRK5,CKAP2,ARHGAP5,RNF168,PHLDB1,SSBP1,AHI1,RERE,CDAN1,SGOL1,SAC3D1,HAUS6,B9D1,FYN,MAP2,NCA PD3,CDT1,ARHGEF7,LEMD2,CUL1,PTN,TMEM11,SPATA13,FKBP1A,CNTR0B,HMGB2,TOR1AIP1,CDH11,AKAP11,EIF4EBP1,GPR3,KAT2B,RIF1,CREB1,IGF1R,PPM1F,PARP11,TCTN3,VCL,FKBP5,MCMBP,PMS2,CEP152,NUP85,SPC25,SUPT4H1,SMC6,PLK1,MDM2,SLIT2,SCMH1,F3,NCAPG2,CDK1,SENP1,ATL2,MUM1,CAP1,CLUH,NCAM1,FMNL3,STRN,VTI1A,FARP1,CAV2,ARF1,Was1,MNS1,UNC5B,FBXW7,DICER1,NAF1,ESPN,STAG1,PPP1R7,FASN,NCAPH,MID1IP1,Nolc1,PANK4,TBC1D24,STIL,DTNBP1,TRAF3IP1,ACP2,CLTC,RAC1,PREX2,RHOJ,SMARCD3,PALB2,Cdc42,ERP29,SMC2,IFT81,USE1,RHOA,NUAK1,INTU,HDGFRP3,CYLD,SPTAN1,JAG1,CDK5RAP2,CDK2,KDM3A,ARL2,C5orf42,CENPC,NGF,WDHD1,SET,Cux1,IPO9,PPP1R12A,FXN,HAUS5,GMNN,USP47,SORBS3,MAPKAPK2,IFRD1,ATG16L1,RASSF1,UHRF1,ATP2C1,POC1B,PANK2,PHF13,LRRK2,DOCK7,PRMT1,NCAPH2,KIAA1033,NFIB,MIS12,CENPH,MSN,RAF1,RNF8,MYH9,MAP6,Ubb,SMC5,HAUS4,KRAS,C21orf2,STK35,ATP2A2,CCND1,ADRB3,PKN2,KLF7,FHL2,Diap2,BOP1,CENPE,SUMO1,BAIAP2,EHD2,NEK6,RUVBL2,KLF1,HIPK2,MSTO1,TP53,TUBGCP3,ATG5,PHIP,ESPL1,APPL2,PAM,CSNK1D,TPM3,TBK1,DDR1,SKP2,HSPA8,PEX2,DYNC1LI2,FSCN1,CCNF,BTG2,GAPDH,CENPT,CHD1L,PTPRA,XRCC5,HACE1,FANCM,RAP2A,ERCC4,DEK,PLXNA3,CDK4,PDS5B,PSEN2,CKAP4,SEPT11,NUF2,SDK1,MMS22L,LBR,SPAG5,CEP162,KISS1R,B4GALT7,CD47,ARF6,MAP4,TRIM27,SORBS1,ALMS1,DAB2,KIF2C,ESCO1,RAD21,DHX9,TUBGCP6,CUL7,VDAC3,NCAPD2,FRK,LAMB2,CCNE1,CAPRIN2,CDKN1A,EIF2B1,PSAP,SPICE1,PLEKHA1,CEP41,MAOA,KLHL17,PSEN1,AKAP1,DLGAP5,NCND,CAMK1D,ATP2B1,POLR3E,RFWD3,TIMM50,SMC4,TLN1,PINX1,SKA1,CEBPG,IFT140,TGFBFR2,MYC,ZW10,LEMD3,Gm21596/Hmgbl1,MAP2K2,RCC1,WDPCP,ARL1,XPO1,CEP131,ULK2,CLASP1,TOP3B,SMC3,SYNE2,UBE4B,KANK2,ORC6,RBFOX2,WASF1,HELLS,BUB1B,SNX3,SLC3A2,METRNL,CDC42BPB,CBX1,TFAM,PIAS4,MATN2,ETV4,XRCC6,MAD1L1,LMBN2,DIXDC1,HSP90AA1,NDC80,CAPN2,ACTN4,SUV420H1,ELMO1,EEA1,CDKL3,RBBP4,ABI2,ARID1A,DPYSL3,UBE2N,RPS6KA3,ATF6,SMAD5,VPS4A,MLH1,RAD50,STIM2,RAD51,CCNA2,DIAPH1,LYST,FANCD2,BMPR1A,TIMP1,NET1,FOXO3,TOR1B,RPS3,MCM9,LONP1,LRWD1,PRKCA,ARC,WDR1,HAUS8,CA PZB,KIRREL,APBB1IP,SLC12A2,CHP1,TUBG1,CANX,TUBGCP2,FOXM1,GIT1,ATL3,FAIM,SH3PXD2A,RPA2,NBN,SLK,PMP22,SS18L1,MAPK14,PRKCI,RAD9A,KIF5B,EHD4,AMIGO1,DCTN1,ATR,CEP70,KIF18A,CENPF,PLD2,ITSN1,SGK1,TOR1A,CDC7,SFPQ,PHACTR4,KPNA1,RAPH1,RICTOR,CHAF1A,RECQL,CXCL10,VEGFA,RUSC1,DYNLL1,PEX16,BAG1,TARDBP,MAP1S,TXN,CEP250,CENPJ,STAT6,ACTR2,NDRG1,CFL1,RPA1,ITPR1,FANCC,GEMIN2,IRF1,MRPL14,TERF2,POM121/POM121C,CCNO,DOCK1,INO80,BSG,GAB1,H2AFX,STIP1,E2F1,RAB11A,HPRT1,LRP8,MAPK7,SEH1L,CYR61,EPHA2,ADAM17,CTCF,PDIA3,HMGN1,SASS6,VCAN,CHEK1,EP300,COL5A1,EFNB2,ID1,YY1,SEC61A1,PDGFRA,RHOU,CEBPA,LAMP1,TOP2A,BID,PRKCE,MAP1LC3A,MCPH1,RASSF5,FAM109A,NCKIPSD,POT1,PLOD3,POGZ,PLAT,AIFM1,MYCN,RPS19,VPS18,HERC1,ACTB,CDC6,TOR1AIP2,MAFK,PPP2R5A,KITLG,BNIP2,CHMP6,ABL2,NDE1,KIF20B,SPRY2,ADAM10,ARAP1,ADD1,PAFAH1B1,ASH2L,SEPT2,WDR19,VAMP4,DYRK1A,ZMYM4,SMARCA1,FZR1,MCM8,EPH2,PALLD,PTPN23,MAPK1,DIAPH3,MELK,TUBB,AURKB,LATS2,LMNB1,FGFR3,ROCK2,PTK2,STMN1,SERP1,TTBK2,NVL,ITGAV,NEO1,NIPBL,HTRA2,ARHGEF25,BRCA1,MYO10,DLC1,Ftx,KIF14,NUP155,ULK4,FGFR1,STK11,RAB10,RAB8A,LMNA,RANBP1,TMOD3,SSRP1,SIPA1L1,RNF4,CCNG2,PKD1,CORO1B,PTPRS,EXTL3,BAZ1B,PEX12,KIF11,INCENP,OBFC1,NFIX,GDNF,PDGFA,PICALM,Pcnt,PKM,MARK2,Spg20,ABL1,Tif1,TAOK1,BCAR1,MCM4,TNFRSF12A,FUT8,EPHB6,NTNG1,ROR2,CCDC88A,SP1,RRN3,PMF1/PMF1-BGLAP,CIT,MICALL1,BLM,CTDNEP1,ACTN1,ABCD3,S1PR2,Nedd4,C2CD3,HDAC1,EFNA3,MAPK9,XIAP,DNM1,GNAI2,KIF24,UBQLN2,EXOC4,LPAR1,SATB1,DYM,SMARCC1,TONSL,HMGCGR,VGF,GS2,LGALS1,WNT5A |

## Supplemental Table 7. General IPA functions for E2F1, E2F3A and E2F3B promoter targets

| ChIP-seq | Category                              | B-H p-value | Genes                                                                                                                                                                                                                                                                                                                                                                                                                                                                                                                                                                                                                                                                                                                                                                                                                                                                                                                                                                                                                                                                                                                                                                                                                                                                                                                                                                                                                                                                                                                                                                                                                                                                                                                                                                                                                                                                                                                                                                                                                                                                                                                                                                                                                                                                                                                                                                                                                                                                                                                                                                                                                                                                                                                                                                                                                                                                                                                                                                                                                                                                  |
|----------|---------------------------------------|-------------|------------------------------------------------------------------------------------------------------------------------------------------------------------------------------------------------------------------------------------------------------------------------------------------------------------------------------------------------------------------------------------------------------------------------------------------------------------------------------------------------------------------------------------------------------------------------------------------------------------------------------------------------------------------------------------------------------------------------------------------------------------------------------------------------------------------------------------------------------------------------------------------------------------------------------------------------------------------------------------------------------------------------------------------------------------------------------------------------------------------------------------------------------------------------------------------------------------------------------------------------------------------------------------------------------------------------------------------------------------------------------------------------------------------------------------------------------------------------------------------------------------------------------------------------------------------------------------------------------------------------------------------------------------------------------------------------------------------------------------------------------------------------------------------------------------------------------------------------------------------------------------------------------------------------------------------------------------------------------------------------------------------------------------------------------------------------------------------------------------------------------------------------------------------------------------------------------------------------------------------------------------------------------------------------------------------------------------------------------------------------------------------------------------------------------------------------------------------------------------------------------------------------------------------------------------------------------------------------------------------------------------------------------------------------------------------------------------------------------------------------------------------------------------------------------------------------------------------------------------------------------------------------------------------------------------------------------------------------------------------------------------------------------------------------------------------------|
| E2F3B    | Embryonic Development                 | 3.48E-21    | NPM1,TGFBR1,CTCF,Ap2b1,TAB2,CCNB2,POR,ADA,PLXNB2,ETS1,CCNE2,SLC2A1,CRKL,TMEM67,TCF3,DAXX,CNTRL,DVL2,KAT6A,RAD18,PRKACA,CELSR3,ECT2,FANCA,NRG2,SNX17,BAG6,GNA11,NOTCH2,PELO,TIPARP,EP400,GAS1,GREM1,KAT5,IGF2R,ID3,MAD2L1,TMEM107,MSH2,CSF1,FBXO5,TFB1M,AP1G1,CDKN2A,SOCS3,SMAD3,ZFPM1,RPGRIP1L,INTS1,SOX2,USP8,MAPK3,MATR3,GPX4,SEC63,ESCO2,HDAC2,IFT74,TXNRD1,BCL2L1,GINS1,RAI1,FOXP4,PBRM1,PDCD10,HDGF,SIX1,NFAT5,ERBB2,TACC3,PSMC3IP,NFATC4,SOD1,BIRC5,MORF4L1,FANCL,E2F7,KLF5,BRCA2,TSC22D1,DDX11,CTGF,F2R,UBR2,EIF6,RBL1,XRCC1,ARNT,POLB,RARA,ZFX,CBFB,HIPK1,FRS2,RTKL1,DNMT1,TFDP1,ANGPTL6,HIRA,PLEC,HBEGF,HMGA1,ADAR,MED12,MNT,ARHGAP5,AHI1,ARHGAP35,PRICKLE1,FYN,OSR2,LEMD2,ARHGEF7,CUL1,PTN,FKBP1A,FZD1,XRCC4,CDH11,NEIL3,HK2,RINT1,CREB1,DAGLB,IGF1R,VCL,ED,OXTR,SUZ12,TIAL1,MDM2,SLIT2,COPS3,F3,NCAPG2,HOXB9,NCAM1,PRPF19,CAV2,Wasl,FBXW7,DICER1,AMD1,METAP2,CAMK2D,SCARB1,ETS2,FASN,Map3k7,FOSL2,SOX4,STIL,DTNBP1,BIRC6,RAC1,SMARCD3,PALB2,NASP,Cdc42,TIMELESS,RHOA,SH2B3,LOXL1,INTU,CYLD,JAG1,CDK2,TMTC3,ZFAT,C5orf42,SRRT,GADD45G,NGF,RAD9B,ZMIZ1,Cux1,FXN,GMNN,NCL,RASSF1,RHBDD3,HSPG2,UHRF1,TRA2B,ATP2C1,HAT1,LRRK2,TCF7L1,TSHZ3,NFIB,PSMC3,RAF1,TRAIP,RDH10,FAM212A,Ubb,KRAS,SLC35C1,CCND1,ATP2A2,GATAD2A,EGR2,CENPE,FBLN1,MTHFD2,TGIF2,ATF4,KLF1,MGAT1,HIPK2,TP53,ESPL1,UBE2Q1,YAP1,TPM3,MAN1A2,DDR1,RBM4,ATF2,SKP2,ATE1,CCNF,BTG2,FADS2,TFRC,INVS,PRDX2,TRIM33,USF2,CDK4,CEBPD,PDS5B,PSEN2,COPS8,KISS1R,ARF6,DAB2,CSNK2B,NFE2L2,CYP51A1,DHX9,ATP7B,SPRY1,CUL7,POLG,LZTS2,ING5,TGS1,Kat6b,CCNE1,ZFPM2,UBR4,CDKN1A,PSAP,SEM A3C,PLEKHA1,CASP7,TCF7L2,ID4,PSEN1,RPL22,PARP2,KLF6,TLN1,PINX1,RNASEH1,ATXN1L,CEBPG,IFT140,TGFBR2,MYC,FDFT1,TNRC6C,Gm21596/Hmgb1,MAP2K2,PIM1,PPP3R1,WDPCCP,Hmga2,PPP1R15B,TAB1,TOP3B,PNN,POFUT1,KMT2A,TFAM,DUSP1,TXN2,XRCC6,MAD1L1,LMNB2,SCARB2,FZD5,SUV420H1,RPSA,RUNX1,ARID1A,SMAD5,ETV6,RAD50,IGF2BP1,MLH1,RAD51,CCNA2,BMPR1A,TIMP1,LDB1,FOXO3,DNAJB1,MCM9,LRRK8A,ARC,WDR1,PRKCA,SLC20A1,POMT2,TUBG1,SMAD6,MTHFD1,FOXM1,GIT1,NBN,PMP22,PSKH1,MAPK14,FOXO1,KIF5B,RAD9A,EHD4,DCTN1,NR6A1,SOCS1,SOX12,CDC7,CDKN2C,HES1,KPNA1,RICTOR,CHAF1A,VEGFA,CXCL10,GSTZ1,MXD3,IPMK,ZBTB14,PCID2,IRS2,TXN,HEY2,KMT2B,CENPJ,TIMP2,UPF2,STAT6,CFL1,TOBP1,FOXH1,COPS5,PTCH1,FANCC,IRF1,PCNA,BSG,GAB1,STIP1,IRS1,HSPB11,MAPK7,CYR61,EPHA2,HIST1H1C,ADAM17,CTC1,ATF7,PKD2,SP2,VCAN,CHEK1,EP300,COL5A1,EFNB2,ID1,YY1,NCOA2,PRRX1,TCOF1,HUS1,PDGFRA,CEBPA,BID,MCPH1,MCM10,HEXIM1,RXR, NCKIPSD,PLOD3,AIFM1,LUZP1,PLAT,RPS19,MYCN,mir-199,ADRM1,DCK,PPP1R8,C10orf2,TBX3,CENPU,AGO2,RQCD1,RAD51B,GINS4,FADD,KITLG,YBX2,ABL2,NDE1,LIMS1,SPRY2,ADAM10,GABPA,RBPJ,FEN1,NCOR2,MAFB,ZFP36L2,PAFAH1B1,DYRK1A,MCM8,PALLD,MAPK1,DIAPH3,TAF10,LATS2,LMNB1,PTK2,FGFR3,ASXL2,TTBK2,EZH2,ITGAV,NIPBL,BRCA1,DLCL1,CDC25A,STK11,FGFR1,TBP,PSMC4,RANBP1,TMOD3,SRSF3,ARRB2,PKD1,PTPRS,POMT1,GNL3,Paxip1,RPL13A,TEAD4,NFIX,GDNF,PICALM,PDGFA,PKM,RBBP8,ABL1,BCLAF1,BCAR1,TCF12,FUT8,ROR2,SP1,GLI3,RRN3,MAML3,RBM15,BLM,ERF,E2F8,DTL,NACA,MAP2K7,S1PR2,HDAC1,C2CD3,SMAD7,let-7,MAPK9,BCL3,USP1,NDUFA13,XIAP,LPAR1,PBX3,B4GALT1,SATB1,VGF,UBC,BCL2L11,LGALS1,WNT5A |
| E2F3B    | RNA Post-Transcriptional Modification | 2.11E-19    | HNRNPL,NPM1,SRSF9,AHCYL1,PCBP1,SFPQ,RBM3,DDX20,ELAVL4,INTS7,RCL1,BOP1,THRAP3,PRPF4B,TARDBP,HNRNPUL1,TCERG1,CSTF2,DUSP11,LSM3,KIN,GRSF1,LSM4,SART3,HNRNPA0,PABPC1,FBL,HCFC1,CDK13,NOVA1,SYNCRIP,RBM4,GEMIN2,Srrm1,PTBP1,SCAF8,CLK2,CPSF3L,SRSF4,RBM39,GCFC2,PRPF3,HNRNPA2B1,CCAR2,PRPF4,SETX,USP39,SF3B3,SRSF10,WTAP,SCAF4,RNPS1,CMTR1,KHSRP,CDC5L,DIS3,SNRNP40,RPS19,HNRNPU,KHDRBS1,PPP1R8,DDX56,SRSF11,AGO2,HNRNPD,SCAF11,PRPF18,IGHMBP2,INTS6,RPS16,SF3B2,DDX39B,RBM6,Rbmx1,CSTF3,USP49,DYRK1A,RPL11,CDKN2A,SRSF2,PRPF19,GEMIN6,DICER1,INTS1,INTS3,MBNL3,SRSF1,SNRPD1,BCAS2,NONO,PPIG,PNN,TBP,RBFOX2,PHRF1,Scaf1,SRSF3,CTDP1,SRSF7,RBM15B,SF3B4,GEMIN7,INTS10,BARD1,CPSF1,WDHD1,TRA2A,RPL14,POLR2A,AHNAK,CSTF2T,NOP58,GEMIN4,DBR1,SNRPD2,EXOSC2,TRA2B,NOP56,ALKBH5,HNRNPM,IVNS1ABP,RPS15,FASTK,LSM5                                                                                                                                                                                                                                                                                                                                                                                                                                                                                                                                                                                                                                                                                                                                                                                                                                                                                                                                                                                                                                                                                                                                                                                                                                                                                                                                                                                                                                                                                                                                                                                                                                                                                                                                                                                                                                                                                                                                                                                                                                                                                                                                                                                                                                                                  |

## Supplemental Table 7. General IPA functions for E2F1, E2F3A and E2F3B promoter targets

| ChIP-seq | Category               | B-H p-value | Genes                                                                                                                                                                                                                                                                                                                                                                                                                                                                                                                                                                                                                                                                                                                                                                                                                                                                                                                                                                                                                                                                                                                                                                                                                                                                                                                                                                                                                                                                                                                                                                                                                                                                                                                                                                                                                                                                                                                                                                                                                                                                                                                                                                                                                                                                                                                                                                                                                                                                                                                                                                                                                                                                                                                                                                                                                                                                                                                                                                                                                                                                                                                                                                                                                                                                                                                                                                                                                                                                                                                                                                                                                                                                                                                                                                                                                                                                     |
|----------|------------------------|-------------|---------------------------------------------------------------------------------------------------------------------------------------------------------------------------------------------------------------------------------------------------------------------------------------------------------------------------------------------------------------------------------------------------------------------------------------------------------------------------------------------------------------------------------------------------------------------------------------------------------------------------------------------------------------------------------------------------------------------------------------------------------------------------------------------------------------------------------------------------------------------------------------------------------------------------------------------------------------------------------------------------------------------------------------------------------------------------------------------------------------------------------------------------------------------------------------------------------------------------------------------------------------------------------------------------------------------------------------------------------------------------------------------------------------------------------------------------------------------------------------------------------------------------------------------------------------------------------------------------------------------------------------------------------------------------------------------------------------------------------------------------------------------------------------------------------------------------------------------------------------------------------------------------------------------------------------------------------------------------------------------------------------------------------------------------------------------------------------------------------------------------------------------------------------------------------------------------------------------------------------------------------------------------------------------------------------------------------------------------------------------------------------------------------------------------------------------------------------------------------------------------------------------------------------------------------------------------------------------------------------------------------------------------------------------------------------------------------------------------------------------------------------------------------------------------------------------------------------------------------------------------------------------------------------------------------------------------------------------------------------------------------------------------------------------------------------------------------------------------------------------------------------------------------------------------------------------------------------------------------------------------------------------------------------------------------------------------------------------------------------------------------------------------------------------------------------------------------------------------------------------------------------------------------------------------------------------------------------------------------------------------------------------------------------------------------------------------------------------------------------------------------------------------------------------------------------------------------------------------------------------------|
| E2F3B    | Developmental Disorder | 2.99E-19    | <p>mir-130, TGFBR1, SSBP2, TMEM231, IFT27, TRIM32, POR, PLXNB2, ETS1, CCNE2, SLC2A1, STK25, CRKL, TMEM67, TCF3, DAXX, DVL2, KAT6A, ITPR3, PRKACA, TMEM43, RMRP, ECT2, FANCA, FLNB, PIM3, BAG6, GNA11, NOTCH2, PELO, HEXB, GPC6, SLC12A6, BBIP1, GAS1, CSGALNACT1, KAT5, ID3, IGF2R, MTHFD1L, TMEM107, CSF1, FBXO5, POC1A, AP1G1, LHX2, SMAD3, GNPAT, RPGRIP1L, INTS1, SMC1A, E2F6, USP8, MATR3, GPX4, ESCO2, EPHA7, DNA2, H6PD, TXNRD1, BCL2L1, H3F3A/H3F3B, SCARF2, RAI1, SF3B4, PBRM1, KIAA0101, RAB23, CHSY1, INPPL1, E2F3, PTGES3, SIX1, NFAT5, STUB1, LARP7, ERBB2, TACC3, PSMC3IP, SOD1, NFATC4, SNX27, BIRC5, ALS2, FANCL, KLF5, E2F7, BRCA2, MAP4K4, AGPS, DDX11, CTGF, F2R, FAM20C, UBR2, EIF6, RBL1, XRCC1, ARNT, POLB, CD2AP, RASGRF1, RARA, CBF B, SLC39A13, SPECC1L, HIPK1, FRS2, DNMT1, TFDP1, CENPB, SLC35A3, HIRA, PLEC, HBEGF, EXOSC8, ADAR, MED12, Anp32b, MNT, SH3GL1, RERE, AH11, ARHGA P35, B9D1, FYN, OSR2, SNAI2, CDT1, CRTAP, CUL1, FKBP1A, CRLF2, DNAJA1, CDH11, XRCC4, MAFG, HK2, KAT2B, RAB33B, IGF1R, TCTN3, VCL, CEP152, SUZ12, POLE, SDCCAG8, TIAL1, MDM2, ACLY, F3, COPS3, REV1, CAP1, HOXB9, PRPF19, VTI1A, CAV2, TMCO1, Wasl, TBX15, FBXW7, DICER1, DHODH, HSD3B7, METAP2, ETS2, FASN, Map3k7, Dazap1, FOSL2, SOX4, TBC1D24, P4HB, STIL, COL4A1, XYLT1, RAC1, BIRC6, SIX5, MUT, PALB2, NASP, CTDP1, COL6A3, LOXL1, SCRIB, INTU, JAG1, CDK2, CDK5RAP2, C5orf42, NGF, KMT2C, RAD9B, Cux1, POLR2A, GMNN, EMILIN1, RASSF1, HSPG2, MTRR, UHRF1, SNRPB, ATP2C1, MTA, TSEN34, NFIB, PSMC3, RAF1, TRAI, RDH10, KRAS, SLC35C1, ATP2A2, CCND1, ADRB3, EMG1, EGR2, SUMO1, FBLN1, GORAB, ATF4, HIPK2, MGAT1, PIGT, GNE, TYMS, TP53, ESPL1, UBE2Q1, YAP1, TPM3, DDR1, Marcks, ATF2, PEX2, CCF, FADS2, TFRC, Meis1, XRCC5, PDE6D, ERCC4, TRIM33, AKAP8, PTPN2, CDK4, PDS5B, PSEN2, COPS8, ALX1, LBR, VRK1, KISS1R, B4GALT7, ARF6, SOS1, DAB2, B3GALNT2, ASPH, CSNK2B, POMGNT2, NFE2L2, RAD21, CYP51A1, ATP7B, HNRNPU, TUBGCP6, CUL7, POLG, HNRNPD, VDAC3, LAMB2, CCNE1, ZFPM2, CDKN1A, MSRA, CEP41, SGCD, TCF7L2, CASP7, PSEN1, LRIG2, ABCC10, ATXN1L, CLPP, IFT140, TGFBR2, MYC, LEMD3, DFDT1, Gm21596/Hmgb1, MAP2K2, PIM1, WDPCP, BRIP1, TAB1, PPP1R15B, CLASP1, SMC3, SYNE2, YWHAE, PNN, ORC6, HELLS, POFUT1, KMT2A, PFKM, XRCC6, RECQL4, SMCHD1, LMNB2, CAPN2, ACTN4, RHBDF1, RPSA, RUNX1, RPS6KA3, SMAD5, SLC39A14, ETV6, IGF2BP1, ARFRP1, STIM2, RAD51, POLR1C, DIAPH1, AHNK, FANCD2, BMRP1A, DNAJB1, MCM9, LONP1, RAD23B, ARC, SLC20A1, POMT2, SLC12A2, TUBG1, CANX, FOXM1, MTHFD1, AMPD2, NBN, LTBP3, FAM111A, MAPK14, PRKCI, KIF5B, ATR, NR6A1, SOCS1, ITSN1, FAM58A, SOX12, HES1, Rpl29 (includes others), CHAF1A, VEGFA, FANCB, PEX16, IPMK, BAG1, HEY2, CENPJ, KMT2B, STAT6, IMPA1, CFL1, FOXH1, MITF, CSRP2, COPS5, PTCH1, FANCC, PCNA, PATZ1, BSG, H2AFX, IRS1, E2F1, GLRA1, MAPK7, HIST1H1C, ADAM17, SCAP, ATF7, SP2, TAX1BP3, CHEK1, EP300, SRSF10, COL5A1, ID1, TRIB1, EFN2, YY1, NCOA2, PRRX1, TCOF1, DGCR8, HUS1, E2F5, PDGFRA, LAMP1, CHST3, CEBPA, MCM10, MCPH1, STIM1, HEXIM1, RASSF5, RXRB, PLOD3, PLAT, EPG5, RPS19, MYCN, mir-199, DCK, C10orf2, INPP5E, ACTB, CDC6, CENPU, DPAGT1, DLX1, AGO2, RAD51B, MAFK, HNRNPDL, POLD1, KITLG, FADD, LIMS1, NDE1, SPRY2, ADAM10, FEN1, RBPJ, MAFB, PAFAH1B1, WDR19, DYRK1A, FZR1, PALLD, MAPK1, INSIG1, MMP16, TAF10, TUBB, LATS2, LMNB1, FGFR3, PTK2, EZH2, ITGAV, NIPBL, BRCA1, RAD51C, CDC25A, KIF14, WDR34, FGFR1, STK11, PSMC4, LMNA, RANBP1, SRSF3, ARRB2, PKD1, EIF4A3, LIN9, PTPRS, CNPY3, POMT1, GNL3, VDAC1, ORC4, Paxip1, CNBP, PEX12, KIF11, KDELR2, TEAD4, PKNOX1, NFIX, MED23, PDGFA, PICALM, MARK2, ABL1, RBBP8, NAA10, BCLAF1, BCAR1, TCF12, EVC, FUT8, ROR2, GLI3, RRN3, LTB P4, BLM, ERF, E2F8, DTL, ABCD3, Nedd4, C2CD3, MTMR14, SMAD7, let-7, MAPK9, RPS6KA5, BCL3, AFF1, GNAI2, EXOC4, B4GALT1, PBX3, LPAR1, CNN3, SATB1, DYM, ARHGAP31, PDE5A, SMARCC1, WNT5A</p> |

## Supplemental Table 7. General IPA functions for E2F1, E2F3A and E2F3B promoter targets

| ChIP-seq | Category            | B-H p-value | Genes                                                                                                                                                                                                                                                                                                                                                                                                                                                                                                                                                                                                                                                                                                                                                                                                                                                                                                                                                                                                                                                                                                                                                                                                                                                                                                                                                                                                                                                                                                                                                                                                                                                                                                                                                                                                                                                                                                                                                                                                                                                                                                                                                                                                                                                                                                                                                                                                                                                                                                                                                                                                                                                                                                                                                                                                                                                                                                                                                                                                                                      |
|----------|---------------------|-------------|--------------------------------------------------------------------------------------------------------------------------------------------------------------------------------------------------------------------------------------------------------------------------------------------------------------------------------------------------------------------------------------------------------------------------------------------------------------------------------------------------------------------------------------------------------------------------------------------------------------------------------------------------------------------------------------------------------------------------------------------------------------------------------------------------------------------------------------------------------------------------------------------------------------------------------------------------------------------------------------------------------------------------------------------------------------------------------------------------------------------------------------------------------------------------------------------------------------------------------------------------------------------------------------------------------------------------------------------------------------------------------------------------------------------------------------------------------------------------------------------------------------------------------------------------------------------------------------------------------------------------------------------------------------------------------------------------------------------------------------------------------------------------------------------------------------------------------------------------------------------------------------------------------------------------------------------------------------------------------------------------------------------------------------------------------------------------------------------------------------------------------------------------------------------------------------------------------------------------------------------------------------------------------------------------------------------------------------------------------------------------------------------------------------------------------------------------------------------------------------------------------------------------------------------------------------------------------------------------------------------------------------------------------------------------------------------------------------------------------------------------------------------------------------------------------------------------------------------------------------------------------------------------------------------------------------------------------------------------------------------------------------------------------------------|
| E2F3B    | Infectious Diseases | 4.59E-18    | NPM1,mir-130,TGFBR1,RAB2A,POLA1,NUP133,POR,SMARCB1,MARCH2,VAMP3,ADA,DAZAP2,FAM172A,SART3,FBL,SLC2A1,NUP107,TCF3,RGP1,DAXX,PDSS1,KAT6A,PRKACA,EIF4EBP2,ARPC1B,DDIT3,PRDX1,BAG6,PPIA,PNRC1,UBE3C,SCFD1,LSM14B,VPS16,KHDRBS1,PMM1,TUBB4B,RPS10,DDX55,SERPINB6,IGF2R,BAK1,KPNB1,RPS16,MSH2,CSF1,CDKN2A,EEF1A1,SOCS3,PCDH18,SMAD3,CCT2,DEPDC5,RGPD4 (includes others),CD164,TPPP,SNN,STXBP1,HDAC2,PGM1,POLR2H,BCL2L1,AEBP2,H3F3A/H3F3B,ALG14,ZC3H7B,RND1,OSBPL6,PDE4A,ZBTB2,CLIC4,EIF2S1,PTGES3,C20orf24,TARBP1,NUP54,AP3M1,RACGAP1,RNF26,MED26,G3BP1,UMPS,HTATSF1,TFCP2,MAP4K4,RAB5C,F2R,RAN,ZNF436,SLC15A4,RRAGB,RAD23A,POLB,RARA,MED16,UAP1,HIPK1,FRS2,PYCRL,RND2,HIRA,ZC3HAV1,GRK5,SPG7,MON2,HMGA1,ADAR,PHF12,RPL10A,SHCBP1,FYN,RREB1,GALC,POLR2J,FKBP1A,TRPT1,DNAJA1,ATP6AP1,EIF4EBP1,NEIL3,RNPS1,RAB33B,CREB1,IGF1R,PARP11,NUP205,RPS5,PSMB9,NUP85,SUZ12,DDX56,MDM2,PLK1,SLIT2,F3,INTS6,RNF144A,TRERF1,CLUH,FAM76B,CAV2,ARF1,VPRBP,PRMT3,Wasl,DICER1,PBK,SCARB1,ETS2,RAB11FIP1,FASN,MID1IP1,SNU13,TFDP2,STX11,SOX4,TRAF3IP1,CLTC,RAC1,NDUFAF2,CTDP1,USE1,RHOA,SH2B3,SPTAN1,CDK2,SH3BP4,SRRT,NUDT3,NGF,SCARB2,POLR2A,NCL,DHX15,RASSF1,UBR5,ATP2C1,C4orf33,MRPS12,C1orf174,STT3A,PSMC3,RAF1,RMI1,KRAS,PANX1,TOMM70A,MTX1,PKN2,GATAD2A,SUMO1,ATF4,RUVBL2,LSM3,MGAT1,TP53,TYMS,ATG5,PGRMC2,RRM2,TBK1,SYNJ2,RAB1B,FSCN1,SUPT16H,BTG2,TFRC,GAPDH,ABCE1,PRDX2,ERI3,DEK,ARL4C,CDK4,CEBPD,UBE2Z,PSEN2,MED28,USP39,HARBI1,NECAB3,MAP4,CD47,ARF6,SNRPD3,CSNK2B,FBXO21,CYP51A1,RAD21,DHX9,G3BP2,KLHDC2,HNRNPU,MED20,POLG,NXF1,MND1,IGHMBP2,POLA2,MSRA,CH25H,SRSF2,ILF3,CAMK1D,AMDHD2,KXD1,TCEB1,MYC,TGFBR2,HSPA4,SAE1,MAP2K2,PPP3R1,XPO1,MITD1,SNRPA1,PPP1R15B,RNF41,TOP3B,PRPF38A,SBF2,DDX23,MYEF2,GABPB2,GM2A,SAP30BP,DDOST,PSMD6,PFKM,CDC42BPB,ATP5B,DUSP1,OXSR1,NDUFA6,HSP90AA1,RUSC2,PKMYT1,SUV420H1,RPSA,EEA1,RUNX1,NMT1,ARID1A,PPIB,GTF2I,RPS6KA3,GTF2A1,MLH1,VPS4A,IGF2BP1,RABEPK,CCNA2,DIAPH1,TIMP1,ITSN2,DNAJB1,LONP1,PRKCA,SLC20A1,ZNF354A,SDC1,APBB1IP,NOP56,TUBG1,HSPD1,HNRNPM,MAPK14,PRKCI,PSMD2,TEAD3,ATR,WNK1,ACSL1,SOCS1,PLD2,AHCYL1,SGK1,SOX12,EXOSC10,SFPQ,TM9SF2,HES1,CHAF1A,VEGFA,CXCL10,INTS7,ZBTB14,IRS2,TXN,TIMP2,ACTR2,STAT6,TIPIN,COPS5,TAFAP4,GEMIN2,IRF1,UBQLN4,AP1S1,TERF2,BSG,GAB1,STIP1,AHCTF1,RAB11A,IFIT2,EPHA2,HIST1H1C,PDIA3,NUP214,ASF1A,EP300,COL5A1,EFNB2,YY1,RPL35,ADK,DGCR8,TOP2A,PDGFRA,EIF3A,MAP1LC3B,MAP1LC3A,RXR,DCP2,KHSRP,PCBP2,PLOD3,PLAT,VPS18,mir-199,INPP5E,PPP1R8,DDX50,ACTB,AGO2,GINS4,HNRNPDL,MAFK,POLD1,FADD,EIF3G,BNIP2,CHMP6,SF3B2,NUP153,PDIA6,PVT1,SREBF2,NDE1,SPRY2,ADAM10,RBPJ,PPP2R5E,NCOR2,DYRK1A,SPCS3,EP300,VPS28,MAPK1,CLTB,TUBB,LOC102724828/MRPL23,SRSF1,LARS,RPS20,ASXL2,EZH2,ITGAV,STAR,IMP2,BRCA1,NUP155,CCDC134,RPL3,FGFR1,PSMC4,LMNA,RAB8A,RANBP1,SSRP1,MED14,WWP2,CCNT1,FLOT2,PCGF1,PKD1,TUBE1,CASP2,EIF4A3,TMPO,PML,KIF11,RPL13A,GABPB1,PICALM,MARK2,ABL1,NUP50,TAOK1,GANAB,NAA10,BCLAF1,BCAR1,EPHB6,TBC1D10A,CIT,MICALL1,ATG16L2,ACTN1,NDUFAF3,TIMM8A,BICD2,HDAC1,let-7,BCL3,PSMA1,NFKBIZ,MED6,PSIP1,XIAP,FAU,DNM1,FDPS,PDE5A,PANK3,MAT2A,EIF2AK2,CAD,HMGCR,BCL2L11,LGALS1 |

## Supplemental Table 7. General IPA functions for E2F1, E2F3A and E2F3B promoter targets

| ChIP-seq | Category                        | B-H p-value | Genes                                                                                                                                                                                                                                                                                                                                                                                                                                                                                                                                                                                                                                                                                                                                                                                                                                                                                                                                                                                                                                                                                                                                                                                                                                                                                                                                                                                                                                                                                                                                                                                                                                                                                                                                                                                                                                                                                                                                                        |
|----------|---------------------------------|-------------|--------------------------------------------------------------------------------------------------------------------------------------------------------------------------------------------------------------------------------------------------------------------------------------------------------------------------------------------------------------------------------------------------------------------------------------------------------------------------------------------------------------------------------------------------------------------------------------------------------------------------------------------------------------------------------------------------------------------------------------------------------------------------------------------------------------------------------------------------------------------------------------------------------------------------------------------------------------------------------------------------------------------------------------------------------------------------------------------------------------------------------------------------------------------------------------------------------------------------------------------------------------------------------------------------------------------------------------------------------------------------------------------------------------------------------------------------------------------------------------------------------------------------------------------------------------------------------------------------------------------------------------------------------------------------------------------------------------------------------------------------------------------------------------------------------------------------------------------------------------------------------------------------------------------------------------------------------------|
| E2F3B    | Connective Tissue Disorders     | 8.35E-17    | RAF1,TGFBR1,RDH10,KRAS,CCND1,POR,EMG1,EGR2,E2F3B,CRADD,SUMO1,SMARCB1,ATF4,PLXNB2,HIPK2,UNG,TYMS,TP53,ETS1,ATG5,YAP1,CRKL,STK25,TBK1,SKP2,ATF2,Marcks,DAXX,DVL2,PEX2,KAT6A,PRKACA,ABCE1,AKAP8,DDIT3,BAG6,CDK4,PDS5B,PSEN2,TNFAIP8L1,ALX1,MAP4,SOS1,UBE2K,ASPH,NFE2L2,CYP51A1,ATN1,DENND4A,EP400,KHDRBS1,GAS1,TUBGCP6,CUL7,LZTS2,IGF2R,BAK1,BUB1,PLA2G4A,MTHFD1L,CCNE1,TMEM107,NR4A2,MSH2,CSF1,CDKN1A,POC1A,TCF7L2,CASP7,PSEN1,CDKN2A,SRSF2,EEF1A1,SMAD3,PARP2,RPGRIP1L,RGPD4 (includes others),TGFBR2,MYC,MAP2K2,PIM1,WDPCC,MAPK3,SNN,MYBL2,JUND,GPX4,DPM3,ESCO2,CLASP1,SMC3,ORC6,DNA2,PSMD6,KMT2A,BCL2L1,TFAM,DU SP1,RECQL4,XRCC6,SF3B4,LMNB2,MAD1L1,PIDD1,RUNX1,TNFAIP8,ARID1A,RAB23,PIAS1,PDE4A,ATF6,SMAD5,E2F3,CLIC4,MLH1,POLR1C,SIX1,NFAT5,FANCD2,BMPR1A,STUB1,TIMP1,LARP7,FOXO3,ERBB2,EYA4,RAD23B,GMFB,PRKCA,TACC3,HSPD1,NFATC4,SOD1,MTHFD1,BIRC5,NBN,IVNS1ABP,SLK,FAM111A,MAPK14,FOXO1,COX5A,BRCA2,ATR,F2R,ITSN1,FAM58A,FAM20C,CDKN2C,HES1,RBL1,E2F3,POLB,RECQL,ARNT,VEGFA,MTF1,RARA,MAP1S,SPECC1L,TXN,HIPK1,DNMT1,CENPJ,IMPA1,CFL1,TFDP1,MITF,FOXH1,COPS5,PTCH1,YWHAZ,HBEGF,ITPR1,MED12,IRF1,Anp32b,MNT,PATZ1,GAB1,GLRA1,E2F1,MBD4,GNB2,ARHGAP35,CYR61,FYN,SCAP,OSR2,SNAI2,CDT1,PDIA3,PTN,FKBP1A,BOK,CHEK1,E2F3,EP300,ID1,EFNB2,YY1,TCOF1,PRRX1,CREB1,LAMP1,PDGFRA,TOP2A,IGF1R,BID,MCPH1,MAP1LC3B,TCTN3,RASSF5,NSMCE1,AIFM1,EPG5,MYCN,CEP152,PMS2,INPP5E,ACTB,POLE,CDC6,DLX1,MDM2,POLD1,C1orf159,CDK1,FADD,SEN1,ABL2,NDE1,SPRY2,HOXB9,RBPJ,DYRK1A,PALLD,VPS28,MAPK1,INSIG1,VPRBP,TMCO1,MMP16,UNC5B,MEK1,DHODH,DICER1,LMNB1,FGFR3,PTK2,STMN1,SIVA1,ETS2,ITPRIP,ITGAV,Map3k7,HTRA2,BRCA1,SOX4,P4HB,STIL,FGFR1,BIRC6,RAC1,LMNA,PALB2,ARRB2,CTDP1,PKD1,E2F3,USE1,CASP2,RHOA,PTPRS,INTU,GNL3,NSMCE4A,CYLD,PML,ORC4,KIF11,CDK5RAP2,C5orf42,CCNC,PDGFA,ABL1,RBBP8,TNFAIP3,NGF,TCF12,ROR2,HINT1,GLI3,ERF,BLM,HSPG2,MAP2K7,MTRR,SNRPB,ATP2C1,GLS,C2CD3,MAPK9,RPS6KA5,GNAI2,FAF1,ENO1,RIPK1,PBX3,LPAR1,SMARCC1,E2F3,BCL2L1,WNT5A,CASP8AP2                       |
| E2F3B    | Skeletal and Muscular Disorders | 8.35E-17    | mir-130,RAF1,TGFBR1,PRKAB2,PRKAB1,RDH10,GARS,RBM3,KRAS,ADRB3,TRIM32,POR,EMG1,EGR2,SUMO1,FBLN1,GORAB,PLXNB2,HIPK2,GNE,TYMS,ETS1,TP53,YAP1,STK25,CRKL,TPM3,Marcks,DAXX,PEX2,DVL2,KAT6A,PRKACA,GAPDH,TMEM43,RMRP,FLNB,DDIT3,AKAP8,BAG6,PDS5B,ALX1,LBR,B4GALT7,NOTCH2,SOS1,DAB2,HEXB,B3GALNT2,ASPH,POMGNT2,GPC6,CYP51A1,HNRNPU,TUBGCP6,GAS1,IGF2R,MTHFD1L,TMEM107,CDKN1A,SGCD,POC1A,TCF7L2,CASP7,PSEN1,MAOA,EEF1A1,SOCS3,KIF1B,SMAD3,GNPAT,RPGRIP1L,IFT140,MYC,TGFBR2,LEMD3,MAP2K2,PIM1,WDPCC,MATR3,JUND,GPX4,CASP1,ESCO2,SMC3,SYNE2,UBE4B,FSTL3,HDAC2,ORC6,DNA2,H6PD,KMT2A,PFKM,DYNC1H1,BCL2L1,SCARF2,RECQL4,SMCHD1,SF3B4,LMNB2,RPSA,RAB23,CHSY1,RPS6KA3,INPPL1,ATF6,SMAD5,E2F3,POLR1C,SIX1,AHNAK,HLA-DMA,STUB1,TIMP1,BMPR1A,LARP7,FOXO3,ERBB2,LONP1,RAD23B,POMT2,TACC3,CANX,HSPD1,MTHFD1,BIRC5,ALS2,NBN,IVNS1ABP,SLK,PMP22,LTBP3,FAM111A,MAPK14,FOXO1,KLF5,BRCA2,ATR,WISP1,AGPS,PLD2,CTGF,F2R,FAM20C,FAM58A,APIP,HES1,MKI67,VEGFA,BAG1,CBFB,SLC39A13,SPECC1L,HIPK1,TIMP2,CENPJ,IMPA1,TFDP1,CFL1,CSR2,FOXH1,MITF,SLC35A3,PTCH1,PLEC,HBEGF,MED12,IRF1,Anp32b,TERF2,MNT,PATZ1,GLRA1,E2F1,CREM,ARHGAP35,CYR61,B9D1,SCAP,OSR2,SNAI2,CDT1,CRTAP,PTN,FKBP1A,CAMK2N2,TAX1BP3,EP300,COL5A1,WTAP,ID1,YY1,HK2,TCOF1,PRRX1,RAB33B,DGCR8,CHST3,IGF1R,PDGFRA,LAMP1,BID,STIM1,MCPH1,CACNB2,TCTN3,PLAT,EPG5,MYCN,miR-199,CEP152,PIPF,INPP5E,ACTB,CDC6,POLE,DPAGT1,DLX1,MDM2,HNRNPDL,ACLY,POLD1,KITLG,FADD,BNIP2,NDE1,LIMS1,SPRY2,ADAM10,HOXB9,CAP1,RBPJ,WDR19,DYRK1A,PALLD,CAV2,MAPK1,INSIG1,MMP16,TMCO1,TBX15,DICER1,DHODH,LMNB1,FGFR3,CAMK2D,ETS2,ITGAV,Map3k7,BRCA1,HK1,SOX4,P4HB,STIL,COL4A1,WDR34,XYL1,FGFR1,RAC1,LMNA,CCNT1,PALB2,ARRB2,COL6A3,PKD1,CTDP1,E2F3,RHOA,LOXL1,PTPRS,POMT1,INTU,JAG1,ORC4,KDEL2,CDK2,KIF11,CDK5RAP2,NFIX,C5orf42,PDGFA,RBBP8,TNFAIP3,BCLAF1,NGF,TCF12,ROR2,Ppp1cc,GLI3,SP1,MANF,ERF,MAPKAPK2,NCL,ATG16L1,EMILIN1,RASSF1,HSPG2,BICD2,MTRR,SNRPB,ATP2C1,MTMR14,C2CD3,let-7,MAPK9,MTAP,XIAP,GNAI2,PBX3,LPAR1,CNN3,DYM,PDE5A,SMARCC1,BCL2L1,WNT5A |



## Supplemental Table 7. General IPA functions for E2F1, E2F3A and E2F3B promoter targets

| ChIP-seq | Category          | B-H p-value | Genes                                                                                                                                                                                                                                                                                                                                                                                                                                                                                                                                                                                                                                                                                                                                                                                                                                                                                                                                                                                                                                                                                                                                                                                                                                                                                                                                                                                                                                                                                                                                                                          |
|----------|-------------------|-------------|--------------------------------------------------------------------------------------------------------------------------------------------------------------------------------------------------------------------------------------------------------------------------------------------------------------------------------------------------------------------------------------------------------------------------------------------------------------------------------------------------------------------------------------------------------------------------------------------------------------------------------------------------------------------------------------------------------------------------------------------------------------------------------------------------------------------------------------------------------------------------------------------------------------------------------------------------------------------------------------------------------------------------------------------------------------------------------------------------------------------------------------------------------------------------------------------------------------------------------------------------------------------------------------------------------------------------------------------------------------------------------------------------------------------------------------------------------------------------------------------------------------------------------------------------------------------------------|
| E2F3B    | Tissue Morphology | 1.45E-16    | NPM1,TRAIP,MYH9,TGFBR1,RDH10,KRAS,CCND1,POR,GATAD2A,PPRC1,PLXNB2,TP53,CCNE2,PAM,YAP1,KLF13,Marcks,DAXX,DVL2,PEX2,CCNF,KAT6A,PRKACA,TFRC,CELSR3,ECT2,PRDX2,TRIM33,PIM3,PTPN2,PRDX1,BAG6,GNA11,CDK4,PSEN2,ALX1,CD47,PELO,SOS1,DAB2,CSNK2B,NFE2L2,DHX9,EP400,SPRY1,GAS1,LZTS2,IGF2R,TGS1,MAD2L1,CCNE1,MSH2,UBR4,FBXO5,PSEN1,CDKN2A,SOCS3,LHX2,SMAD3,KLF6,KXD1,ZFPM1,ABCC10,TLN1,RPGRIP1L,TGFBR2,MYC,PIM1,MAPK3,PPP3R1,MYBL2,PPP1R15B,DIDO1,POFUT1,TXNRD1,PFKM,BCL2L1,GINS1,FZD5,H1F0,UBE2I,RUNX1,ARID1A,RPS6KA3,SMAD5,ETV6,ARFRP1,RAD51,BMPR1A,LDB1,FOXO3,PRDM6,RAD23B,ARC,SLC20A1,POMT2,SOD1,NFATC4,BIRC5,NBN,PRKCI,MAPK14,FOXO1,RAD9A,E2F7,KLF5,BRCA2,MAP4K4,NR6A1,DDX11,CTGF,F2R,UBR2,SOX12,HES1,RBL1,ARNT,XRCC1,VEGFA,IPMK,RARA,ZFX,CBFB,TXN,HEY2,FRS2,RTKL1,TIMP2,KMT2B,CENPJ,CFL1,TFDP1,FOXH1,ANGPTL6,COPS5,HIRA,FANCC,ADAR,MNT,PATZ1,GAB1,E2F1,AHCTF1,ARHGAP35,LRP8,MAPK7,SAC3D1,B9D1,HIST1H1C,ADAM17,PKD2,H2AFZ,EP300,COL5A1,ID1,EFNB2,PRRX1,TCOF1,HUS1,PDGFRA,PRKCE,MCM10,MCPH1,VCL,RXRB,PLOD3,RPS19,MYCN,DCK,SUZ12,PPP1R8,TBX3,CENPU,AGO2,MDM2,SLIT2,MAFK,F3,COPS3,KITLG,SEN1,ABL2,NDE1,LIMS1,ADD1,ADAM10,HOXB9,FEN1,IREB2,ZFP36L2,PAFAH1B1,FZR1,MAPK1,DIAPH3,Wasl,MMP16,FBXW7,TAF10,LATS2,METAP2,PTK2,SCARB1,ETS2,EZH2,ITGAV,Map3k7,BRCA1,FBXO45,DLC1,STX11,CDC25A,SOX4,STK11,FGFR1,RAC1,BIRC6,TMOD3,PALB2,Cdc42,ARRB2,SH2B3,SCRIB,POMT1,INTU,CYLD,TMPO,JAG1,Paxip1,CDK2,INCENP,ZFAT,GDNF,PICALM,ABL1,SLC7A1,BCLAF1,PRKAG1,ZMIZ1,ROR2,FXN,GMNN,SIPA1,MAML3,RBM15,BLM,ERF,CTDNEP1,E2F8,S1PR2,UHRF1,TRA2B,HAT1,ATP2C1,SMAD7,TCF7L1,NDUFA13,B4GALT1,EIF2AK2,SMARCC1,WNT5A |

## Supplemental Table 7. General IPA functions for E2F1, E2F3A and E2F3B promoter targets

| ChIP-seq | Category                    | B-H p-value | Genes                                                                                                                                                                                                                                                                                                                                                                                                                                                                                                                                                                                                                                                                                                                                                                                                                                                                                                                                                                                                                                                                                                                                                                                                                                                                                                                                                                                                                                                                                                                                                                                                                                                                                                                                                                                                                                                                                                                                                                                                                                                                                                                                                                                                                                                                                                                                                                                                                                                                                                                                                                                                                                                                                                                                                                                                                                                                                                                                                                                                                                                                                                                                                                                                                                                                                                                                                                                                                                                                                                                                                                                                                                                                                                                                                                                                                                                                                                                                                                                                                                                                                                                                                                                                                                                                                                                                                                                                                                                                                                                                                                                                                                                                                                                                                                                                                                                                                                                                                                       |
|----------|-----------------------------|-------------|-----------------------------------------------------------------------------------------------------------------------------------------------------------------------------------------------------------------------------------------------------------------------------------------------------------------------------------------------------------------------------------------------------------------------------------------------------------------------------------------------------------------------------------------------------------------------------------------------------------------------------------------------------------------------------------------------------------------------------------------------------------------------------------------------------------------------------------------------------------------------------------------------------------------------------------------------------------------------------------------------------------------------------------------------------------------------------------------------------------------------------------------------------------------------------------------------------------------------------------------------------------------------------------------------------------------------------------------------------------------------------------------------------------------------------------------------------------------------------------------------------------------------------------------------------------------------------------------------------------------------------------------------------------------------------------------------------------------------------------------------------------------------------------------------------------------------------------------------------------------------------------------------------------------------------------------------------------------------------------------------------------------------------------------------------------------------------------------------------------------------------------------------------------------------------------------------------------------------------------------------------------------------------------------------------------------------------------------------------------------------------------------------------------------------------------------------------------------------------------------------------------------------------------------------------------------------------------------------------------------------------------------------------------------------------------------------------------------------------------------------------------------------------------------------------------------------------------------------------------------------------------------------------------------------------------------------------------------------------------------------------------------------------------------------------------------------------------------------------------------------------------------------------------------------------------------------------------------------------------------------------------------------------------------------------------------------------------------------------------------------------------------------------------------------------------------------------------------------------------------------------------------------------------------------------------------------------------------------------------------------------------------------------------------------------------------------------------------------------------------------------------------------------------------------------------------------------------------------------------------------------------------------------------------------------------------------------------------------------------------------------------------------------------------------------------------------------------------------------------------------------------------------------------------------------------------------------------------------------------------------------------------------------------------------------------------------------------------------------------------------------------------------------------------------------------------------------------------------------------------------------------------------------------------------------------------------------------------------------------------------------------------------------------------------------------------------------------------------------------------------------------------------------------------------------------------------------------------------------------------------------------------------------------------------------------------------------------------------------|
| E2F3B    | Reproductive System Disease | 2.45E-15    | TGFBR1,C6orf203,PPWD1,TLE1,FRMD6,POR,PPRC1,SART3,ETS1,CCNE2,PEAK1,NUP107,RANBP3,TMEM67,MASTL,DCLRE1A,HIST1H2BM,ALCAM,ELMO2,CPOX,SNX17,SYNM,NOTCH2,RABL6,PTPN4,TIPARP,ATN1,EXO1,SLC12A6,UBE3C,SDHA,LSM14B,VPS16,CSGALNACT1,ID3,CDS2,BUB1,AP1G1,CDKN2A,EEF1A1,SMAD3,DEPDC5,SMAP2,CEP57,MAPK3,JUND,ZWINT,ZSCAN22,PGM1,RAD54L,KCNAB2,PTPDC1,PHRF1,PIK3R3,DYNC1H1,BCL2L1,YPEL5,H3F3A/H3F3B,SEC61A2,CBX3,MCCC2,ETAA1,ZC3H7B,KLF10,RAB23,PIAS1,RNASEH2B,GPHN,CLIC4,EIF2S1,MARVELD1,TARBP1,SIX1,NUP54,LARP7,ARL15,IGSF8,ILKAP,LASP1,MEF2A,SOD1,SNX27,FRMD4A,FAM122A,HTATSF1,RPS15,TUBB6,CENPI,E2F7,TSC22D1,ING1,SLC25A5,RPLP0,RAP2B,HNRNPL,TUBA1B,MCM6,AGPS,ASPCR1,CTGF,FAM20C,ZNF436,FNDC3B,XRCC1,SLC22A15,HIST1H2AJ,ZFX,TDP2,CBFB,UAP1,PRIM2,SPECC1L,CCNT2,HIPK1,DNMT1,C19orf57,PABPC1,PIK3C2B,TTC21A,TFDP1,ZC3HAV1,PLEC,HBEGF,GRK5,HMGA1,SPOP,SH3GL1,SUCO,FAM222A,C11orf30,NCLN,RCBTB1,RMND1,ARHGA P35,HAUS6,R3HCC1L,SNAI2,GALC,CDT1,PLAGL1,PTN,CENPN,FKBP1A,FZD1,DNAJA1,ATP6AP1,TYW1,GPR3,NEIL3,SCAF4,RIF1,RINT1,TICRR,IGF1R,TXN L1,VCL,FKBP5,ZNF25,NSMCE1,TTC39B,EED,PSMB9,CEP152,DUT,BLMH,USPL1,PLK1,F3,RRM1,ZNF546,SENP1,MUM1,ZNF507,TRERF1,COBLL1,NCAM1,C LUH,TMCO1,METAP1,TBX15,FBXW7,TIGD3,DHODH,ZNF91,TMEM242,YWHAQ,FAM208A,TBC1D4,NAF1,ETS2,DZIP3,PPP1R7,FSD1L,ZNF717,TRIB2,PGP,M SL2,PANK4,GOLGA1,STIL,COL4A1,BIRC6,RHOJ,ATP10A,MAT2B,SMARCD3,ZBTB44,PALB2,SORD,WHSC1L1,LRRCC41,BRAT1,COL6A3,SCRIB,HDGFRP3,K BTBD8,CDK5RAP2,ZNHIT6,ATAD2B,NGF,ZMIZ1,NELFE,MRPS27,ZFP90,TRIM24,POLR2A,C19orf44,SLC25A4,ATP2C1,ZNF664,LRRK2,PFKP,MARCH5,C1orf1 74,NCAPH2,TSHZ3,ZNF382,KIAA1033,PAN3,ZDHHC12,DSSC1,SLC25A3,USP34,TRIM59,SCFD2,NIPA2,RAF1,DDHD2,TRAP,WDR90,MYH9,PCBP1,R DH10,IQCK,MAP6,HMMR,PPIL4,RALGAPB,SLC35C1,FAM208B,RNASE4,ZFYVE1,DOCK11,ZC3H12C,MPHOSPH8,CCDC122,NUP93,CENPE,FBLN1,CD99L2, TGIF2,GNE,TYMS,CBX8,TUBGCP3,ASF1B,PHIP,ESPL1,SOGA1,APPL2,YAP1,FAM118A,EEF2,ZNF496,AGPAT4,PLEKHG2,TNPO2,PEX2,MORC2,TFRC,ZNF6 44,PTPRA,FRG1,ANKLE1,ABCE1,RBM39,INF2,FAM188B,NOL7,PLXNA3,FBXO10,ARL4C,HNRNPA2B1,ODF2L,RHOT2,EEF1B2,CDK4,PDS5B,CEBPD,CTDSP L,KIAA0754,PGS1,NUF2,SDK1,NAA15,CDKN3,MAP4,PRR14L,SOS1,ATP5J2,LAPTM4A,DAB2,PEMT,CDC5L,NFE2L2,CYP51A1,RAD21,RBN1,DHX9,DENND4 A,HNRNPU,SPRY1,MED20,TUBGCP6,LZTS2,ING5,LAMB2,PRPF18,CCNE1,ZFPM2,UBR4,CAPRIN2,ABCF2,CDKN1A,EIF4A1,WDR63,MAOA,FOXN2,RPL22,M EGF9,MSH3,VPS13A,NME2,TSFM,TLN1,LMBR1L,LRRCC57,ZW10,MYC,TGFBR2,KCTD20,AMOTL2,WDCP,ZNF598,FIGNL1,XPO1,SUGT1,CNOT6,KLF11,CLA SP1,EIF4B,ARHGAP11A,SPECC1,SMC3,CCDC18,YWHAQ,C3orf58,DDX23,FSTL3,PNN,TNPO1,SLC12A7,RBFOX2,PSMD3,WDYHV1,B3GALNT1,TUSC3,TBL1 X,TAF1,UGP2,USP32,MATN2,ETV4,SEPT10,RUSC2,HSP90AA1,MAD1L1,NCKAP5L,ACTN4,SSFA2,FAM83D,SUV420H1,RBBP4,ABI2,UBE2N,COMMD7,DENN D4B,DCAF4,RPS6KA3,SLC39A14,RAD50,IGF2BP1,STIM2,TRA2A,RAD51,CCNA2,RABEPK,DIAPH1,LYST,AHNAK,SPAG7,FYTTD1,BMP1R1A,TIMP1,ACAD8,ID H3A,ACO1,VARS,RPS3,LRRCC8A,PRKCA,WDR1,SLC20A1,POMT2,HAUS8,SDC1,APBB1IP,ETFA,AP1S2,SLC12A2,RALY,HSPD1,AMPD2,RPA2,SH3PXD2A,P RKCI,FOXO1,PHF19,PSMD2,LSM11,TEAD3,SGK1,APIP,CDKN2C,ZNF451,SFPQ,RICTOR,KPNA1,CHST2,CXCL10,VEGFA,NCOA7,ZNF367,MTF1,HNRNPUL1, CSTF2,HEY2,KMT2B,OTUD4,TMEM55B,PSMD5,RCBTB2,ITPR1,IRF1,ERCC6L2,DOCK1,PCNA,RFC4,CPNE8,BHLHE40,IRS1,GLRA1,E2F1,MSH5,LRP8,HELB, SEH1L,YEATS4,PKD2,CAMK2N2,VCAN,TAX1BP3,EP300,CHEK1,XYLB,TGFBRAP1,TRIB1,NCOA2,ADK,PRKCE,MCM10,MAP1LC3B,LPP,ZWILCH,LUZP1,PLA T,EPG5,RPS19,CWC22,RAD51B,STXBP6,PCDH9,RPIA,POLD1,SIN3A,KIF15,SPDYA,ABL2,MCM2,ADAM10,FEN1,HEATR5A,NCOR2,SCAMP3,ZFP36L2,USP4 9,ASH2L,RPL11,FZR1,ANKS1B,DIAPH3,PAK1IP1,XXYLT1,FNIP2,MELK,CCNL1,USF3,PTK2,STMN1,C19orf43,EZH2,NVL,NIPBL,HTRA2,SIAH2,ZNF623,MYO10 ,AIM1,RASAL2,WDR34,FGFR1,PSMC4,LMNA,RANBP1,MARS,ELF1,GSR,ARRB2,PLEKHH2,LCORL,RRP7A,C1orf27,NFYC,MAP4K5,TMPO,MTDH,PFAS,PHF1 ,RFC3,DRAP1,TEAD4,KDM3B,PAFAH1B2,ZBTB7A,TNRC6B,MED23,PDGFA,MEIS2,NUP50,ING4,TAOK1,FUT8,VGLL3,CIT,RABGGTB,MICALL1,MCCC1,RBM1 5,LTBP4,S1PR2,C2CD3,let- 7,RPS6KA5,KIAA2026,ANAPC13,GNAI2,ENO1,PPP6R1,DYM,PAQR4,HMGCR,SHMT2,BCL2L11,MCM7,GSG2,LGALS1,WNT5A,NPM1,mir- 130,TPD52L2,CTCF,RPE,PRKAB1,POLA1,NUP133,SMARCD2,CCNB2,EIF4A2,TSPAN15,Ewsr1,EIF3B,TCERG1,MAP1A,MOB1A,FBL,HCFC1,SLC2A1,STK25,R GP1,GART,CNTRL,DAXX,ITPR3,CELSR3,C3orf67,CCDC138,ECT2,CPE,FANCA,KIF20A,FLNB,PRDX1,BAG6,GNA11,CEBPZ,SERHL2,VAT1L,TTK,PNRC1,C2C D5,SCFD1,KPNA3,EP400,TUBB4B,GAS1,PASK,MAPK6,IGF2R,BAK1,MSH2,CSF1,SEPHS1,MAZ,FBXO5,KANSL2,KIF23,SOCS3,NAV2,MPRIP,PCDH18,YWHA H,SEPT9,CCT2,RNF7,RPGRIP1L,ZDHHC14,SMC1A,RGPD4 (includes others),INTS3,SOX2,USP8,TSEN15,ANXA11,ARHGAP20,ERAL1,EPHA7,OSBPL1A,STXBP1,POLE4,SESN3,HDAC2,POLR1B,WEE1,RDX,H6PD,PTPRM,TXNR D1,OSBPL8,CAND1,GINS1,RBM15B,RAI1,CEP76,PBRM1,LITAF,OSBPL6,KIAA0101,MCM3AP,BARD1,ALAS1,RBBP5,IQGAP1,E2F3,PHLDB2,NFAT5,GTPBP2, ZNF24,ERBB2,VAV2,ADAM15,RACGAP1,PSMC3IP,MED26,NFATC4,MTO1,BIRC5,ALS2,FANCL,SLC36A4,CKS1B,ZDHHC3,BRCA2,CCP110,DDX11,F2R,DST N,GHITM,MKI67,DDX20,HBP1,RBL1,Cvb5r3,HIST1H2AB,ARNT,POLB,RARA,MGAT4B,AFAP1,SLC39A13,RTEL1,PYCRL,CNOT1,PTPRG,YWHAZ,MDC1,MTF2. |

## Supplemental Table 7. General IPA functions for E2F1, E2F3A and E2F3B promoter targets

| ChIP-seq | Category               | B-H p-value | Genes                                                                                                                                                                                                                                                                                                                                                                                                                                                                                                                                                                                                                                                                                                                                                                                                                                                                                                                                                                                                                                                                                                                                                                                                                                                                                                                                                                                                                                                                                                                                                                                                                                                                                                                                                                                                                                                                                                                                                                                                                                                                                                                                                                                                                                                                                                                                                                                                                                                                                                                                                                                                                                                                                                                                                                                                                                                                                                                                                                                                                                                                                                                                                                                                                                                                                                                                                                                                                                                                                                                                                                                                                                                                                                                                                                                                                                                                                                                                                                                                                                                                                                                                                                                                                                                                                                                                                                                                                                                                                                                                                                                                                                                                                                                                                                                                                                                                                                                                                                                                                                                                                                                                                                                                                                                                                                                                                                                                                                                                                                                                                                                                                                                                                                                                                                                                                                                                                                                                                                                                                                    |
|----------|------------------------|-------------|------------------------------------------------------------------------------------------------------------------------------------------------------------------------------------------------------------------------------------------------------------------------------------------------------------------------------------------------------------------------------------------------------------------------------------------------------------------------------------------------------------------------------------------------------------------------------------------------------------------------------------------------------------------------------------------------------------------------------------------------------------------------------------------------------------------------------------------------------------------------------------------------------------------------------------------------------------------------------------------------------------------------------------------------------------------------------------------------------------------------------------------------------------------------------------------------------------------------------------------------------------------------------------------------------------------------------------------------------------------------------------------------------------------------------------------------------------------------------------------------------------------------------------------------------------------------------------------------------------------------------------------------------------------------------------------------------------------------------------------------------------------------------------------------------------------------------------------------------------------------------------------------------------------------------------------------------------------------------------------------------------------------------------------------------------------------------------------------------------------------------------------------------------------------------------------------------------------------------------------------------------------------------------------------------------------------------------------------------------------------------------------------------------------------------------------------------------------------------------------------------------------------------------------------------------------------------------------------------------------------------------------------------------------------------------------------------------------------------------------------------------------------------------------------------------------------------------------------------------------------------------------------------------------------------------------------------------------------------------------------------------------------------------------------------------------------------------------------------------------------------------------------------------------------------------------------------------------------------------------------------------------------------------------------------------------------------------------------------------------------------------------------------------------------------------------------------------------------------------------------------------------------------------------------------------------------------------------------------------------------------------------------------------------------------------------------------------------------------------------------------------------------------------------------------------------------------------------------------------------------------------------------------------------------------------------------------------------------------------------------------------------------------------------------------------------------------------------------------------------------------------------------------------------------------------------------------------------------------------------------------------------------------------------------------------------------------------------------------------------------------------------------------------------------------------------------------------------------------------------------------------------------------------------------------------------------------------------------------------------------------------------------------------------------------------------------------------------------------------------------------------------------------------------------------------------------------------------------------------------------------------------------------------------------------------------------------------------------------------------------------------------------------------------------------------------------------------------------------------------------------------------------------------------------------------------------------------------------------------------------------------------------------------------------------------------------------------------------------------------------------------------------------------------------------------------------------------------------------------------------------------------------------------------------------------------------------------------------------------------------------------------------------------------------------------------------------------------------------------------------------------------------------------------------------------------------------------------------------------------------------------------------------------------------------------------------------------------------------------------------------------------------------------------|
| E2F3B    | Organismal Development | 2.85E-15    | TGFBF1, TLE1, POR, SMARCB1, ADA, ETS1, CCNE2, CRKL, TMEM67, DVL2, RAD18, ALCAM, PIM3, DDIT3, SNX17, PRDX4, PPIA, NOTCH2, TIPARP, PELO, EXO1, ATN1, SLC12A6, CSGALNACT1, ID3, POC1A, AP1G1, CDKN2A, SMAD3, INTS1, SMAP2, CEP57, MAPK3, MATR3, JUN, MTMR2, ING2, MAPKAPK5, KCNAB2, GNAZ, BCL2L1, TFEB, PIAS1, PDCD10, CLIC4, HDGF, SIX1, LARP7, LASP1, TACC3, MEF2A, ALKBH5, SOD1, SNX27, MORF4L1, E2F7, TFCP2, TSC22D1, ING1, BRPF1, SLC25A5, CTGF, FAM20C, UBR2, XRCC1, RASGRF1, ZFX, CBF, SPECC1L, TLL5, HIPK1, FRS2, DNMT1, PIK3C2B, Irf5, TFDP1, CENPB, HIRA, PLEC, ZC3HAV1, HBEGF, HMG1A, ANP32b, SH3GL1, ARHGAP35, SAC3D1, SNAI2, LEMD2, PTN, CUL1, FKBP1A, FZD1, DNAJA1, H2AFZ, MAFG, GPR3, NEIL3, HK2, RINT1, IGF1R, DAGLB, VCL, TCTN3, EED, OXTR, BLMH, F3, COPS3, SENP1, SBF1, CAMKK1, NCAM1, PRPF19, CAV2, FBXW7, ETS2, Map3k7, MID1P1, Dazap1, STIL, COL4A1, BIRC6, RHOJ, SMARCD3, PALB2, SCRIB, INTU, RCE1, Nespas, LRIG3, NGF, ZMIZ1, RAD9B, HINT1, MAN2C1, POLR2A, FXN, SLC25A4, LRRK2, TCF7L1, TSHZ3, RAF1, TRAI, RNF8, MYH9, RDH10, FAM212A, SLC35C1, ATP2A2, ADH5, RCL1, GATAD2A, FBLN1, TGIF2, KLF1, MGAT1, GNE, ATG5, PHIP, ESPL1, YAP1, MAN1A2, Marcks, ATE1, PEX2, FADS2, TFRC, Meis1, SPPL2A, FANCM, NOL7, AKAP8, PTPN2, PDS5B, CDK4, CEBPD, SDK1, SOS1, DAB2, ASPH, NFE2L2, PEMT, CYP51A1, SPRY1, LZTS2, ING5, SLC29A1, LAMB2, CCNE1, ZFPM2, UBR4, CDKN1A, EIF4A1, PSAP, MSRA, LDHA, MAP3K3, TCF7L2, CASP7, ID4, PSEN1, MAOA, LRIG2, RPL22, KIF1B, KXD1, TLN1, ABCC10, RNASEH1, ATXN1L, CEBPG, MYC, TGFB2, Gm21596/Hmgb1, WDPCP, PPP3R1, Hmga2, CEP131, YWHAE, FSTL3, SLC12A7, HELLS, TXN2, XRCC6, RECQL4, MAD1L1, HSP90AA1, FZD5, SSFA2, ACTN4, H1FO, SUV420H1, RPS6KA3, SLC39A14, ETV6, IGF2BP1, RAD50, RAD51, CCNA2, DIAPH1, AHNK, HLA-DMA, BMP1A, TIMP1, LRRC8A, PRKCA, WDR1, SLC20A1, POMT2, SLC12A2, AP1S2, CANX, HSPD1, MTHFD1, AMPD2, SS18L1, MAPK14, FOXO1, RAD9A, SOX12, CDKN2C, ERI1, KPNA1, RICTOR, Rpl29 (includes others), CXCL10, GSTZ1, VEGFA, FANCB, DYNLL1, MTF1, PCID2, HEY2, KMT2B, MITF, CSRP2, ITPR1, FANCC, IRF1, DOCK1, PCNA, PATZ1, YARS, BHLHE40, IRS1, E2F1, HSPB11, MSH5, LRP8, VASH2, PKD2, SP2, VCAN, SGMS1, EP300, SRSF10, CHEK1, WTAP, TRIB1, NCOA2, PRRX1, USP42, LAMP1, PRKCE, MCM10, NCKIPSD, PLOD3, LUZP1, PLAT, RPS19, DLX1, RAD51B, MAFK, POLD1, ABL2, ADAM10, GABPA, FEN1, NCOR2, ZFP36L2, FZR1, EPS15, VPS28, INSIG1, DIAPH3, GNB5, PTK2, EZH2, NIPBL, HTRA2, FBXO45, FGFR1, PSMC4, LMNA, RAB8A, RANBP1, TMOD3, GSR, ARRB2, PTPRS, TMPO, PML, MTDH, TEAD4, PAFAH1B2, PKNOX1, PDGFA, Pcnt, MARRK2, ING4, FUT8, Ppp1cc, SP1, CIT, RBM15, SLC25A25, TIMM8A, MAP2K7, S1PR2, Nedd4, C2CD3, SMAD7, let-7, BCL3, GNAI2, B4GALT1, SMARCC1, VGF, UBC, BCL2L11, WNT5A, LGALS1, mir-130, NPM1, CTCF, PRKAB1, SLC6A9, Ap2b1, TAB2, CCNB2, SSBP2, PRKCD, PLXNB2, PIGF, TCF3, ABCA7, SP4, CNTRL, DAXX, KAT6A, ITPR3, PRKACA, CELSR3, ECT2, FANCA, CPE, FLNB, NRG2, PRDX1, BAG6, GNA11, HEXB, EP400, KHDRBS1, GAS1, GREM1, IGF2R, BAK1, TMEM107, MSH2, CSF1, FBXO5, TFB1M, SOCS3, LHX2, SEPT9, SFMBT1, GNPAT, ZFPM1, RGP1, RGPD4 (includes others), SOX2, USP8, GPX4, SEC63, OSBPL1A, HDAC2, IFT74, RDX, H6PD, POLR2H, EIF4E2, NDC1, PTPRM, TXNRD1, GINS1, RAI1, FOXP4, UBE2I, PBRM1, PEBP1, ALG14, RND1, INPPL1, E2F3, IQGAP1, PTGES3, NFAT5, STUB1, ZNF24, ERBB2, VAV2, ADAM15, PSMC3IP, NFATC4, BIRC5, FANCL, KLF5, CKS1B, BRCA2, DDX11, F2R, RTCB, RAN, DDX20, EIF6, RBL1, POLB, ARNT, CD2AP, RARA, RTEL1, YWHAZ, SPG7, ADAR, MED12, ANKRD26, CMIP, ARHGAP5, MNT, AAAS, AH1, RERE, CREM, PRICKLE1, B9D1, FYN, MAP2, OSR2, ARHGEF7, HMG2, CDH11, EIF4EBP1, CREB1, POLE, TIAL1, MDM2, SLIT2, SCMH1, CDK1, REV1, GTPBP3, HOXB9, WDR48, NAB2, VTI1A, PRMT3, Wasi, MNS1, UNC5B, DICER1, AMD1, METAP2, CAMK2D, SCARB1, FASN, FOSL2, STX11, SOX4, DTNBP1, RAC1, CCDC155, MUT, SIX5, HERC2, Cdc42, NASP, CTDP1, TIMELESS, RHOA, SH2B3, LOXL1, SBNO2, CYLD, JAG1, CDK2, TMTC3, KDM3A, BRD2, ZFAT, SPRED1, C5orf42, GADD45G, SRRT, KMT2C, SCARB2, Cux1, CSTF2T, GMNN, SIPA1, IFRD1, MAPKAPK2, NCL, DHX15, RASSF1, RHBDD3, HSPG2, TRA2B, UHRF1, HAT1, PANK2, EDF1, PLEKHG5, NFIB, ADAM9, CBF2A2, PSMC3, RMI1, PRKAB2, TMEM38A, Ubb, KRAS, CCND1, ADRB3, EGR2, FHL2, SUMO1, MTHFD2, ATF4, ADORA2B, HIPK2, UNG, TARBP2, TP53, KLF13, DDR1, RBM4, ATF2, SKP2, TPST1, CCNF, FSCN1, BTG2, INVS, KIAA1429, XRCC5, PRDX2, TRIM33, USF2, PSEN2, ALX1, KISS1R, ARF6, CD47, TRIM27, ALMS1, CSNK2B, POMGNT2, ATP7B, CUL7, HNRNP, TGS1, HSPA2, PLA2G4A, SEMA3, PLEKHA1, SGCD, ILF3, RASA3, KLF6, PARP2, GNB2L1, IFT140, FDFT1, HSPA4, LEMD3, TNRC6C, MAP2K2, PIM1, MYBL2, CHTF18, GCLM, TAB1, PPP1R15B, TOP3B, PGK1, UBE4B, DIDO1, WASF1, POFUT1, KMT2A, PFKM, TFAM, ATP5B, DUSP1, LMNB2, CAPN2, HELT, RHBDF1, RPSA, RUNX1, ARID1A, PPIB, GTF2I, SMAD5, MLH1, FANCD2, LDB1, FOXO3, EYA4, MCM9, ARL4A, RAD23B, PRDM6, ARC, KIRREL, CAPZB, TUBG1, SMAD6, FOXM1, GIT1, NBN, RCAN1, LTBP3, PMP22, PSKH1, KIF5B, EHD4, DCTN1, WNK1, KIF18A, SOCS1, NR6A1, ABCA2, ITSN1, CDC7, HES1, CHAF1A, MXD3, THRAP3, ZBTB14, TARDBP, MAP1S, IRS2, TXN, ICOSLG/LOC102723996, CENPJ, TIMP2, UPF2, STAT6, MEX3C, CFL1, NDRG1, FOXH1, TOPBP1, COPS5, PTCH1, GAB1, BSG, STIP1, H2AFX, AHCTF1, MAPK7, CYR61, EPHA2, HIST1H1C, ADAM17, CTC1, ATF7, CTNNA3, COL5A1, EFN2, ID1, YY1, TCOF1, HUS1, DGCR8, CEBPA, CHST3, PDGFRA, BID, MCPH1, STIM1, HEXIM1, RASSF5, RXRB, PCBP2, AIFM1, MYCN, mir-199, ADRM1, DCK, INPP5E, PPP1R8, TBX3, AGO2, RQCD1, KATNAL1, KITLG, FADD, YBX2, NUP153, SREBF2, LIMS1, NDE1, SPRY2, ADD1, TBPL1, RBPJ, MAFB, IREB2, KIF23, CDKN2A, NPM1, MCM8, DIAPH3, SUV39H1, PARP2, KRAS, AURKB, LATS2, RECQL, POLB, MYC, CD2AP, DYNLL1, Gm21596/Hmgb1, PIM1, BRCA1, BRIP1, RAD51C, RTEL1, CDC25A, TP53, ATG5, KIF14, HCFC1, COPS5, SEPT7, LMNA, FANCC, TERF2, PALB2, DAXX, RECQL4, H2AFX, ECT2, FANCA, XRCC5, CDK2, RUNX1, ERC4, PTPN2, SEPT11, XRCC4, SIX1, HUS1, MCPH1, BLM, MCM9, POT1, E2F8, RASSF1, LZTS2, MAPK9, MDM2, SOD1, USP1, NBN, KPNB1, MAD2L1, SPIDR, CCNE1, MSK2, PDXP, CSF1, CDKN1A, BRCA2, POLH |
| E2F3B    | Cellular Compromise    | 1.26E-14    |                                                                                                                                                                                                                                                                                                                                                                                                                                                                                                                                                                                                                                                                                                                                                                                                                                                                                                                                                                                                                                                                                                                                                                                                                                                                                                                                                                                                                                                                                                                                                                                                                                                                                                                                                                                                                                                                                                                                                                                                                                                                                                                                                                                                                                                                                                                                                                                                                                                                                                                                                                                                                                                                                                                                                                                                                                                                                                                                                                                                                                                                                                                                                                                                                                                                                                                                                                                                                                                                                                                                                                                                                                                                                                                                                                                                                                                                                                                                                                                                                                                                                                                                                                                                                                                                                                                                                                                                                                                                                                                                                                                                                                                                                                                                                                                                                                                                                                                                                                                                                                                                                                                                                                                                                                                                                                                                                                                                                                                                                                                                                                                                                                                                                                                                                                                                                                                                                                                                                                                                                                          |

## Supplemental Table 7. General IPA functions for E2F1, E2F3A and E2F3B promoter targets

| ChIP-seq | Category           | B-H p-value | Genes                                                                                                                                                                                                                                                                                                                                                                                                                                                                                                                                                                                                                                                                                                                                                                                                                                                                                                                                                                                                                                                                                                                                                                                                                                                                                                                                                                                                                                                                                                                                                                                                                                                                                                                                                                                                                                                                                                                                                                                                                                                                                                                                                                                                                                                                                                                                                                                                                                                                                                                                                                                                                                                                                                                                                                                                                                                                                                                                                                                                                                                                                                                                                                                                                                                                                                                                                                                                                                                                                                                                                                                                                                                                                                                                                                                                                                                                                                                                                                                                                                                                                                                                                                                                                                                                                                                                                                                                                                                                                                                                                                                                                                                                                                                                                        |
|----------|--------------------|-------------|--------------------------------------------------------------------------------------------------------------------------------------------------------------------------------------------------------------------------------------------------------------------------------------------------------------------------------------------------------------------------------------------------------------------------------------------------------------------------------------------------------------------------------------------------------------------------------------------------------------------------------------------------------------------------------------------------------------------------------------------------------------------------------------------------------------------------------------------------------------------------------------------------------------------------------------------------------------------------------------------------------------------------------------------------------------------------------------------------------------------------------------------------------------------------------------------------------------------------------------------------------------------------------------------------------------------------------------------------------------------------------------------------------------------------------------------------------------------------------------------------------------------------------------------------------------------------------------------------------------------------------------------------------------------------------------------------------------------------------------------------------------------------------------------------------------------------------------------------------------------------------------------------------------------------------------------------------------------------------------------------------------------------------------------------------------------------------------------------------------------------------------------------------------------------------------------------------------------------------------------------------------------------------------------------------------------------------------------------------------------------------------------------------------------------------------------------------------------------------------------------------------------------------------------------------------------------------------------------------------------------------------------------------------------------------------------------------------------------------------------------------------------------------------------------------------------------------------------------------------------------------------------------------------------------------------------------------------------------------------------------------------------------------------------------------------------------------------------------------------------------------------------------------------------------------------------------------------------------------------------------------------------------------------------------------------------------------------------------------------------------------------------------------------------------------------------------------------------------------------------------------------------------------------------------------------------------------------------------------------------------------------------------------------------------------------------------------------------------------------------------------------------------------------------------------------------------------------------------------------------------------------------------------------------------------------------------------------------------------------------------------------------------------------------------------------------------------------------------------------------------------------------------------------------------------------------------------------------------------------------------------------------------------------------------------------------------------------------------------------------------------------------------------------------------------------------------------------------------------------------------------------------------------------------------------------------------------------------------------------------------------------------------------------------------------------------------------------------------------------------------------------|
| E2F3B    | Tissue Development | 1.74E-13    | TGFBF1,FRMD6,ELAVL4,POR,SMARCB1,ADA,ETS1,CCNE2,CRKL,TMEM67,DVL2,RAD18,ELMO2,MORC3,DDIT3,SNX17,SLC1A5,PRDX4,PPIA,NOTCH2,TIP ARP, ID3,BUB1,MAD2L1,CDKN2A,SMAD3,INTS1,SMAP2,CEP57,MAPK3,MATR3,JUND,MTMR2,ING2,BCL2L1,H3F3A/H3F3B,KLF10,RAB23,PIAS1,PDE4A,RNA SEH2B,CSR1,GPHN,CLIC4,HDGF,SIX1,PDK1,TACC3,ALKBH5,MEF2A,SOD1,MORF4L1,PPM1G,RPS15,BRPF1,SLC25A5,MAP4K4,HNRNPL,CTGF,UBR2,FA M20C,FNDC3B,RASGRF1,ZFX,RAB17,CBFB,CCDC124,CCNT2,TLL5,HIPK1,FRS2,DNMT1,RND2,GET4,PIK3C2B,Irx5,HIRA,PLEC,HBEGF,SYNCRIP,GRK5,H MGA1,SUCO,SNAI2,PLAGL1,LEMD2,PTN,FKBP1A,FZD1,DNAJA1,ATP6AP1,MAFG,GPR3,NEIL3,DAGLB,IGF1R,VCL,FKBP5,EED,OXTR,PSMB9,PLK1,F3,NCA PG2,RRM1,SBF1,NCAM1,PRPF19,CAV2,TBX15,FBXW7,ETS2,TRIB2,Map3k7,Dazap1,TBC1D24,STIL,COL4A1,CLTC,SMARCD3,PALB2,INTU,RCE1,HDGFRP3 ,NGF,ZMIZ1,HINT1,TRIM24,USP47,ANKRD54,LRRK2,TMEM14C,TSHZ3,NCAPH2,FAF1,SLC25A38,TTC7A,RAF1,RNF8,MYH9,RDH10,MAP6,HMMR,FAM212A, SLC35C1,ATP2A2,NKAP,KLF7,CENPE,FBLN1,KLF1,MGAT1,ATG5,ESPL1,YAP1,MAN1A2,ATE1,PEX2,FADS2,TFRC,Meis1,PTPRA,TMEM64,PLXNA3,PTPN2, HNRNPA2B1,CDK4,CEBPD,COPS8,SEPT11,SDK1,DAB2,NFE2L2,CYP51A1,DHX9,HNRNPU,LAMB2,CCNE1,ZFPM2,CAPRIN2,CDKN1A,EIF2B1,PSAP, ID4,TC F7L2,CASP7,MAOA,PSEN1,RPL22,NCDN,CAMK1D,PIEZO1,ATXN1L,CEBPG,TGFBF2,MYC,Gm21596/Hmgb1,PPP3R1,FIGNL1,Hmga2,CEP131,SMC3,FSTL3, RBFOX2,SNX3,TBL1X,MATN2,ETV4,TXN2,XRCC6,MAD1L1,HSP90AA1,FZD5,SUV420H1,ABI2,DPYSL3,UBE2N,RPS6KA3,ETV6,STIM2,CCNA2,DIAPH1,TIMP1 ,BMPR1A,HLA-DMA,LRRC8A,PRKCA,WDR1,SLC12A2,AP1S2,HSPD1,MTHFD1,FAIM,SH3PX2A,SS18L1,MAPK14,PRKCI,FOXO1,AMIGO1,SGK1,SOX12,CDKN2C,RICTOR, Rpl29 (includes others),RECQL,RS1,CXCL10,VEGFA,DYNLL1,HEY2,KIN,MITF,RPA1,PLCL2,FANCC,ITPR1,GEMIN2,IRF1,DOCK1,PATZ1,IRS1,BHLHE40,E2F1,HSPB11,MSH5, LRP8,PHLPP1,VASH2,PKD2,ASF1A,FNTB,SP2,VCAN,CHEK1,EP300,WTAP,NCOA2,USP42,ADK,LAMP1,PRKCE,MCM10,NCKIPSD,PLOD3,LUZP1,PLAT,RPS 19,DLX1,MAFK,SIN3A,DGKZ,ABL2,UNK,ADAM10,GABPA,FEN1,NCOR2,ZFP36L2,FZR1,INSIG1,DIAPH3,PTK2,STMN1,EZH2,NIPBL,HTRA2,ARHGFE25,FBXO 45,MYO10,FGFR1,LMNA,RAB8A,RANBP1,TMOD3,GSR,ARRB2,CORO1B,PTPRS,PML,PAFAH1B2,TEAD4,PKNOX1,ZBTB7A,PDGFA,MARK2,TMEM120A,FUT 8,Ppp1cc,SP1,VGLL3,MANF,CIT,MICALL1,RBM15,MAP2K7,S1PR2,Nedd4,MRC2,C2CD3,SMAD7,let- 7,BCL3,GNAI2,B4GALT1,SLC25A27,SMARCC1,HMGCR,VGF,BCL2L11,WNT5A,LGALS1,NPM1,KIF13B,CTCF,Ap2b1,TAB2,SECISBP2,Ewsr1,PLXNB2,FBL,ST K25,TCF3,SP4,CNTRL,KAT6A,PRKACA,CELSR3,ECT2,FLNB,NRG2,EIF4EBP2,BAG6,GNA11,HEXB,EP400,KHDRBS1,GAS1,ZNF521,GREM1,IGF2R,TMEM10 7,MSH2,CSF1,KIF23,SOCS3,MPRIP,SEPT9,LHX2,YWHAH,SFMBT1,GNPAT,RNF7,ZFPM1,RPGRIP1L,SOX2,USP8,GPX4,EPHA7,HDAC2,WEE1,IFT74,RDX,PT PRM,NDC1,TXNRD1,OSBPL8,GINS1,SF3B4,FOXP4,PBRM1,PEBP1,RND1,KIAA101,CHSY1,IQGA1,E2F3,PTGES3,NFAT5,STUB1,ERBB2,VAV2,ADAM15,S MARCE1,NFATC4,SERTAD1,BIRC5,ALS2,FANCL,KLF5,BRCA2,F2R,MKI67,DDX20,RBL1,RPS11,ARNT,POLB,RARA,LEPROT,RTEL1,YWHAZ,ADAR,MED12,A NKRD26,ARHGAP5,MNT,AHI1,RERE,CREM,PRICKLE1,FYN,OSR2,MAP2,ARHGFE7,HMGB2,XRCC4,CDH11,EIF4EBP1,CREB1,PMS2,HDGFRP2,TIAL1,MDM2 ,SLIT2,SCMH1,CDK1,CBLN1,CCDC85B,CIRBP,NAB2,WDR48,STRN,VTI1A,FARP1,VPRBP,Was1,MNS1,DICER1,METAP2,CAMK2D,SCARB1,STAG1,FASN,FO SL2,SOX4,DTNBP1,RAC1,CCDC155,PREX2,SIX5,OSTM1,HERC2,Cdc42,TIMELESS,RHOA,SH2B3,LOXL1,NUAK1,SBNO2,CYLD,JAG1,CDK2,KDM3A,TMTC3, ZFAT,BRD2,SPRED1,C5orf42,PA2G4,GADD45G,KMT2C,SET,Cux1,CSTF2T,GMNN,GTPBP4,MAPKAPK2,RASSF1,HSPG2,HAT1,PANK2,DOCK7,EDF1,PRMT1 ,PIAS3,NFIB,MSN,Ubb,KRAS,RBM3,CCND1,ADRB3,EGR2,FHL2,BAIAP2,ATF4,ADORA2B,HIPK2,TARBP2,TP53,FBXO9,CSNK1D,TPM3,KLF13,DDR1,ATF2,SK P2,CCNF,BTG2,KIAA1429,XRCC5,PRDX2,RAP2A,PSEN2,ALX1,KISS1R,B4GALT7,CD47,ARF6,TRIM27,ALMS1,CSNK2B,CUL7,TOB1,FRK,HSPA2,PLA2G4A,N R4A2,SEMA3C,PLEKHA1,RASA3,POLR3E,GNB2L1,PARP2,SART1,IFT140,FDFT1,HSPA4,MAP2K2,PIM1,MYBL2,CHTF18,PDZRN3,TAB1,ULK2,TOP3B,PGK1, UBE4B,POFUT1,KMT2A,SLC3A2,METRN,TFAM,ATP5B,DUSP1,DIXDC1,LMNB2,ELMO1,EEA1,CDKL3,RUNX1,TNFAIP8,ARID1A,ATF6,SMAD5,MLH1,FANCD2, LDB1,FOXO3,MCM9,ARL4A,LONP1,RAD23B,CAPZB,SMAD6,FOXM1,GIT1,ZHX3,NBN,RCAN1,LTBP3,PMP22,PSKH1,EHD4,ATR,WISP1,WNK1,SOCS1,NR6A1 ,PLD2,ITSN1,TOR1A,HES1,RAPH1,RUSC1,MXD3,THRAP3,BAG1,TARDBP,ZBTB14,MAP1S,IRS2,TXN,CEP250,ICOSLG/LOC102723996,TIMP2,CENPJ,STAT6 ,CDK13,CFL1,NDRG1,MEX3C,FOXH1,PTCH1,TFAP4,GAB1,BSG,STIP1,H2AFX,AHCTF1,RAB11A,HPRT1,MAPK7,CYR61,EPHA2,HIST1H1C,ADAM17,CTC1,A TF7,PDIA3,HMG1, COL5A1,EFNB2,ID1,YY1,TCOF1,HUS1,CEBPA,PDGFRA,BID,STIM1,CACNB2,HEXIM1,RXR,MYCN,mir- 199,ADRM1,DCK,TBX3,ACTB,HERC1,CDC6,RQCD1,AGO2,GINS4,KATNAL1,KITLG,FADD,YBX2,NUP153,NDE1,LIMS1,SPRY2,KIF20B,ADD1,TBPL1,RBPJ,MA FB,PAFAH1B1,SEPT2,DYRK1A,MCM8,PALLD,MAPK1,TFG,LMNB1,ROCK2,FGFR3,TTBK2,ASXL2,RORA,ITGAV,BRCA1,RAD51C,DLC1,Fus,IGFBP6,STK11,mir- 3960,RAB10,KIAA1715,SIPA1L1,CCNG2,TOB2,PKD1,LIN9,GNL3,EXTL3,Pax10,RPL13A,NFIX,GDNF,PICALM,PKM,ABL1,TNFAIP3,BCLAF1,BCAR1,PRKAG1,T |

## Supplemental Table 7. General IPA functions for E2F1, E2F3A and E2F3B promoter targets

| ChIP-seq | Category                          | B-H p-value | Genes                                                                                                                                                                                                                                                                                                                                                                                                                                                                                                                                                                                                                                                                                                                                                                                                                                                                                                                                                                                                                                                                                                                                                                                                                                                                                                                                                                                                                                                                                                                                                                                                                                                                                                                                                                                                                                                                                                                                                                                                                                                                                                                                                                                                                                                                                                                                                                                                                                                                                                                                                                                                                                                                                                                                                                                                                                                                                                                                                                                                                                                                                                                                                                                                                                                                                                                                                                                                                                                                                                                                                                                                                                                                                                                                                                                                                                                                                                                                                                                                                              |
|----------|-----------------------------------|-------------|------------------------------------------------------------------------------------------------------------------------------------------------------------------------------------------------------------------------------------------------------------------------------------------------------------------------------------------------------------------------------------------------------------------------------------------------------------------------------------------------------------------------------------------------------------------------------------------------------------------------------------------------------------------------------------------------------------------------------------------------------------------------------------------------------------------------------------------------------------------------------------------------------------------------------------------------------------------------------------------------------------------------------------------------------------------------------------------------------------------------------------------------------------------------------------------------------------------------------------------------------------------------------------------------------------------------------------------------------------------------------------------------------------------------------------------------------------------------------------------------------------------------------------------------------------------------------------------------------------------------------------------------------------------------------------------------------------------------------------------------------------------------------------------------------------------------------------------------------------------------------------------------------------------------------------------------------------------------------------------------------------------------------------------------------------------------------------------------------------------------------------------------------------------------------------------------------------------------------------------------------------------------------------------------------------------------------------------------------------------------------------------------------------------------------------------------------------------------------------------------------------------------------------------------------------------------------------------------------------------------------------------------------------------------------------------------------------------------------------------------------------------------------------------------------------------------------------------------------------------------------------------------------------------------------------------------------------------------------------------------------------------------------------------------------------------------------------------------------------------------------------------------------------------------------------------------------------------------------------------------------------------------------------------------------------------------------------------------------------------------------------------------------------------------------------------------------------------------------------------------------------------------------------------------------------------------------------------------------------------------------------------------------------------------------------------------------------------------------------------------------------------------------------------------------------------------------------------------------------------------------------------------------------------------------------------------------------------------------------------------------------------------------------|
| E2F3B    | Cellular Function and Maintenance | 2.59E-13    | mir-130,NPM1,KIF13B,TGFBR1,CTCF,RAB2A,POLA1,NUP133,ELAVL4,TMEM231,GPSM2,GORASP2,PRKCDBP,MAP1A,PLXNB2,CENPW,ETS1,CRKL,STK25,TM<br>EM67,SP4,DAXX,DVL2,PRKACA,RAD18,CELSR3,ECT2,FLNB,DDIT3,EIF4EBP2,BAG6,TTK,SYNM,PELO,BNIP1,HEXB,RNF19A,BBIP1,KAT5,KPNB1,MAD2L1,<br>TMEM107,CSF1,FBXO5,AP1G1,KIF23,CDKN2A,EEF1A1,MPIRIP,SEPT9,LHX2,YWHAH,SMAD3,RNF7,HDAC10,RPGRIP1L,SMC1A,SOX2,USP8,CEP57,TPPP,<br>MAPK3,ARHGAP20,GPX4,EPHA7,HDAC2,WEE1,IFT74,RDX,DNA2,RAD54L,MAPKAPK5,Afg3l1,PTPRM,PTPDC1,TXNRD1,BCL2L1,H3F3A/H3F3B,SF3B4,UBE<br>2I,PBRM1,TFEB,RND1,KIZ,KIAA0101,RAB23,PVRL3,NEDD1,CSRP1,INPPL1,EIF2S1,IQGAP1,LRRC29,ZBTB24,PHLDB2,PTGES3,HDGF,STUB1,ERBB2,PKD1,<br>LASP1,VAV2,TACC3,IFT46,RACGAP1,MEF2A,SMARCE1,SOD1,NFATC4,ALS2,BIRC5,KLF5,BRCA2,BORA,CCP110,CTGF,RAB5C,F2R,MTBP,SUV39H1,RAN,<br>HBP1,RBL1,POLB,RASGRF1,CD2AP,RAB17,AFAP1,SPECC1L,BAG5,RTEL1,RND2,SEPT7,PLEC,HBEGF,CKAP2,GRK5,SPG7,ARHGAP5,PHLDB1,RNF168,R<br>ERE,AHI1,CDAN1,HAUS6,SAC3D1,B9D1,FYN,MAP2,ARHGEF7,LEMD2,TMEM11,PTN,SPATA13,FKBP1A,HMGB2,EIF4G1,ATP6AP1,SF3B3,AKAP11,EIF4EBP<br>1,RIF1,CREB1,IGF1R,PARP11,TCTN3,VCL,PMS2,CEP152,NUP85,SPC25,USPL1,MDM2,USP30,PLK1,SLIT2,ACLY,F3,CDK1,ATG2A,ATL2,REV1,RAB12,MUM<br>1,CAP1,CLUH,NCAM1,FMNL3,STRN,PRPF19,CAV2,FARP1,ARF1,WasI,UNC5B,MNS1,DICER1,YWHAQ,TBC1D4,NAF1,SCARB1,ESPN,FASN,Map3k7,MID1IP<br>1,PANK4,Nolc1,TBC1D24,STIL,DTNBP1,ACP2,TRAF3IP1,CLTC,BIRC6,RAC1,PREX2,RHOJ,OSTM1,PALB2,Cdc42,SMC2,USE1,RHOA,IFT81,NUAK1,INTU,SP<br>TAN1,CYLD,HDGFRP3,CDK2,CDK5RAP2,ARL2,KDM3A,SH3BP4,C5orf42,NGF,WDR1,SCARB2,Cux1,PPP1R12A,HAUS5,FXN,IFRD1,MAPKAPK2,ATG16L1,R<br>ASSF1,HSPG2,POC1B,ATP2C1,LRRK2,DOCK7,PRMT1,KIAA1033,PAN3,NFIB,CENPH,MSN,RAF1,RNF8,MYH9,MAP6,RALGAPB,Ubb,HAUS4,KRAS,C21orf2,S<br>TK35,CCND1,NKAP,PKN2,KLF7,FHL2,Diap2,CENPE,SUMO1,EHD2,BAIAP2,NEK6,ATF4,RUVBL2,KLF1,MSTO1,SGSM2,TP53,ATG5,TUBGCP3,PHIP,ESPL1,S<br>OGA1,PAM,APPL2,CSNK1D,USP19,TPM3,TBK1,DDR1,PEX2,DYNC1LI2,CCNF,FSCN1,BTG2,GAPDH,CENPT,CHD1L,TBC1D5,XRCC5,FANCM,HACE1,TRIM3<br>3,DEK,ERCC4,RAP2A,PLXNA3,FBXO7,CDK4,CKAP4,PSEN2,SEPT11,NUF2,SDK1,SPAG5,CEP162,ARF6,CD47,MAP4,TRIM27,SORBS1,ALMS1,DAB2,KIF2C,<br>NFE2L2,CDC5L,RAD21,TUBGCP6,CUL7,POLG,LAMB2,PLA2G4A,NR4A2,UBR4,CAPRIN2,CDKN1A,EIF2B1,CEP41,KLHL17,MAOA,PSEN1,DLGAP5,NCDN,CA<br>MK1D,ATP2B1,GNB2L1,TIMM50,SMC4,PINX1,TLN1,SART1,MYC,ZW10,IFT140,LEMD3,Gm21596/Hmgbl,MAP2K2,RCC1,WDPCC,ARL1,XPO1,CEP131,ULK2,<br>CLASP1,SYNE2,UBE4B,SIK2,RBFOX2,WASF1,SLC3A2,METRN,CDC42BPB,MATN2,XRCC6,ETV4,HSP90AA1,NDC80,DIXDC1,LMNB2,CAPN2,ACTN4,ELMO1,<br>RBBP4,CDKL3,ABI2,ARID1A,DPYSL3,UBE2N,RPS6KA3,ATF6,SMAD5,WDR6,RAD50,VPS4A,STIM2,RAD51,DIAPH1,LYST,WDFY3,NET1,FOXO3,TOR1B,RPS<br>3,LONP1,LRWD1,WDR1,ARC,PRKCA,KIRREL,HAUS8,CAPZB,APBB1IP,CHP1,TUBG1,CANX,PTRHD1,TUBGCP2,FOXM1,GIT1,ATL3,RPA2,NBN,SLK,CISD1,P<br>MP22,SS18L1,PRKCI,MAPK14,FOXO1,RAD9A,KIF5B,COX5A,AMIGO1,DCTN1,CEP70,KIF18A,CENPF,PLD2,ITSN1,SGK1,TOR1A,SFPQ,PHACTR4,KPNA1,RA<br>PH1,RICTOR,CHAF1A,CXCL10,VEGFA,DYNLL1,PEX16,USP10,MAP1S,CEP250,CENPJ,ACTR2,CFL1,NDRG1,MITF,RPA1,ITPR1,FANCC,TERF2,POM121/PO<br>M121C,CCNO,DOCK1,PCNA,BSG,GAB1,H2AFX,STIP1,E2F1,RAB11A,HPRT1,LRP8,SEH1L,CYR61,EPHA2,CTC1,PDIA3,HMGN1,SASS6,EP300,CHEK1,EFNB<br>2,ID1,YY1,SEC61A1,LAMP1,PDGFRA,RHO,CEBPA,PRKCE,NAA60,MAP1LC3A,STIM1,MAP1LC3B,RASSF5,NCKIPSD,FAM109A,POT1,PLAT,EPG5,RPS19,V<br>PS18,TBC1D9,HERC1,ACTB,TOR1AIP2,FADD,KITLG,BNIP2,CHMP6,ABL2,NDE1,KIF20B,ADAM10,ARAP1,ADD1,PAFAH1B1,SEPT2,WDR19,VAMP4,DYRK1A,<br>ZMYM4,MCM8,PALLD,EPH2,PTPN23,MAPK1,DIAPH3,TUBB,LATS2,PTK2,STMN1,ROCK2,TTBK2,EZH2,ITGAV,NEO1,HTRA2,ARHGEF25,BRCA1,MYO10,DL<br>C1,Ftx,NUP155,ULK4,FGFR1,STK11,RAB10,LMNA,RAB8A,RANBP1,TMOD3,SSRP1,SIPA1L1,SRSF3,CCNT1,RNF4,PCGF1,PKD1,CORO1B,CASP2,MTDH,PM<br>L,KIF11,PEX12,PAFAH1B2,OBFC1,NFIX,GDNF,PDGFA,PICALM,Pcnt,MARK2,PKM,ABL1,RBBP8,TAOK1,BCAR1,TNFRSF12A,FUT8,EPHB6,TBC1D10A,NTNG<br>1,ROR2,CCDC88A,SP1,RRN3,CIT,MICALL1,BLM,CTDNEP1,ACTN1,ABCD3,S1PR2,ATG10,Nedd4,HDAC1,C2CD3,EFNA3,MAPK9,HIVEP2,DNM1,KIF24,RIPK1,<br>UBQLN2,LPAR1,SATB1,DYM,EIF2AK2,VGF,BCL2L11,WNT5A |

## Supplemental Table 7. General IPA functions for E2F1, E2F3A and E2F3B promoter targets

| ChIP-seq | Category        | B-H p-value | Genes                                                                                                                                                                                                                                                                                                                                                                                                                                                                                                                                                                                                                                                                                                                                                                                                                                                                                                                                                                                                                                                                                                                                                                                                                                                                                                                                                                                                                                                                                                                                                                                                                                                                                                                                                                                                                                                                                                                                                                                                                                                                                                                                                                                                                                                                                                                                                                                                                                                                                                                                                                                                                                                                                                                                                                                                                                                                                                                                                                                                                                                                                                                                                                                                                                                                                                                                                                                                                                                                                                                                                                                                                                                                                                                                                                                                                                                                                                                                                                                                                                                                                                                                                                                                                                                                                                                                                                                                                                                                                                                                                                                              |
|----------|-----------------|-------------|----------------------------------------------------------------------------------------------------------------------------------------------------------------------------------------------------------------------------------------------------------------------------------------------------------------------------------------------------------------------------------------------------------------------------------------------------------------------------------------------------------------------------------------------------------------------------------------------------------------------------------------------------------------------------------------------------------------------------------------------------------------------------------------------------------------------------------------------------------------------------------------------------------------------------------------------------------------------------------------------------------------------------------------------------------------------------------------------------------------------------------------------------------------------------------------------------------------------------------------------------------------------------------------------------------------------------------------------------------------------------------------------------------------------------------------------------------------------------------------------------------------------------------------------------------------------------------------------------------------------------------------------------------------------------------------------------------------------------------------------------------------------------------------------------------------------------------------------------------------------------------------------------------------------------------------------------------------------------------------------------------------------------------------------------------------------------------------------------------------------------------------------------------------------------------------------------------------------------------------------------------------------------------------------------------------------------------------------------------------------------------------------------------------------------------------------------------------------------------------------------------------------------------------------------------------------------------------------------------------------------------------------------------------------------------------------------------------------------------------------------------------------------------------------------------------------------------------------------------------------------------------------------------------------------------------------------------------------------------------------------------------------------------------------------------------------------------------------------------------------------------------------------------------------------------------------------------------------------------------------------------------------------------------------------------------------------------------------------------------------------------------------------------------------------------------------------------------------------------------------------------------------------------------------------------------------------------------------------------------------------------------------------------------------------------------------------------------------------------------------------------------------------------------------------------------------------------------------------------------------------------------------------------------------------------------------------------------------------------------------------------------------------------------------------------------------------------------------------------------------------------------------------------------------------------------------------------------------------------------------------------------------------------------------------------------------------------------------------------------------------------------------------------------------------------------------------------------------------------------------------------------------------------------------------------------------------------------------------|
| E2F3B    | Cell Morphology | 1.44E-11    | <p>SNTB2,mir-130,NPM1,KIF13B,TGFBR1,SLC6A9,PRKAB1,TAB2,ELAVL4,TMEM231,SMARCB1,ADA,PLXNB2,ETS1,HCFC1,STK25,CRKL,TMEM67,TCF3,SP4,DCLRE1A,DAXX,DVL2,KAT6A,ITPR3,PRKACA,RAD18,CELSR3,ELMO2,ECT2,PIM3,DDIT3,EIF4EBP2,PRDX1,BAG6,GNA11,SYNM,HEXB,EXO1,SLC12A6,FKBP3,EP400,BIP1,GAS1,KAT5,IGF2R,ID3,BAK1,KPNB1,BUB1,MAD2L1,TMEM107,CSF1,MAZ,FBXO5,CDKN2A,KIF23,EEF1A1,SOCS3,MPRIIP,YWHAH,SEPT9,SMAD3,GNPAT,HDAC10,ZFPM1,RNF7,RPGRIP1L,SOX2,MAPK3,GPX4,ING2,EPHA7,HDAC2,WEE1,IFT74,DNA2,RDX,H6PD,RAD54L,PTPDC1,PTPRM,TXNRD1,BCL2L1,H3F3A/H3F3B,PBRM1,PEBP1,TFEB,RND1,KIAA0101,RAB23,KLF10,PVRL3,CHSY1,PDE4A,NEDD1,CSR1,GPHN,EIF2S1,IQGAP1,E2F3,LRRC29,CLIC4,PHLDB2,ZBTB24,SIX1,STUB1,ZNF24,ERBB2,PKD1,LASP1,VAV2,TACC3,IFT46,ADAM15,RACGAP1,MEF2A,SMARCE1,PSMC3IP,SOD1,NFATC4,ALS2,BIRC5,MORF4L1,KLF5,E2F7,BRCA2,SLC25A5,CTGF,MTBP,F2R,DSTN,RAN,HBP1,RBL1,EIF6,POLB,ARNT,CD2AP,RASGRF1,RARA,RAB17,TDP2,CBFB,DNMT1,RND2,Irx5,SEPT7,PLEC,COMMD9,YWHAZ,SYNCRIP,HBEGF,GRK5,SPG7,HMGA1,ADAR,CMIP,ARHGAP5,SH3GL1,RNF168,RERE,AHI1,CREM,SAC3D1,B9D1,FYN,MAP2,SNAI2,PTPN13,ARHGEF7,PLAGL1,PTN,SPATA13,FKBP1A,HMGB2,EIF4G1,DNAJA1,H2AFZ,ATP6AP1,TOR1AIP1,CDH11,EIF4EBP1,GPR3,RIF1,HK2,CREB1,IGF1R,PPM1F,TCTN3,VCL,FKBP5,PSMB9,NUP85,PMS2,PIPF,USPL1,USP30,MDM2,PLK1,SLIT2,ACLY,F3,CDK1,NCAPG2,ATG2A,SEN1,REV1,RAB12,SBF1,CIRBP,CAMKK1,CAP1,NCAM1,NAB2,STRN,PRPF19,FARP1,VTI1A,CAV2,ARF1,Was1,MNS1,FBXW7,DICER1,AMD1,YWHAQ,NAF1,CAMK2D,TBC1D4,ESPN,SCARB1,ETS2,FASN,TRIB2,Map3k7,FOSL2,SOX4,TBC1D24,STIL,DTNBP1,TRAF3IP1,ACP2,CLTC,BIRC6,RAC1,PREX2,MUT,SIX5,OSTM1,PALB2,Cdc42,SMC2,IFT81,RHOA,SH2B3,NUAK1,INTU,HDGFRP3,CYLD,SBNO2,CDK2,KDM3A,SH3BP4,C5orf42,NGF,SCARB2,Cux1,SET,MAN2C1,CSTF2T,GMNN,MAPKAPK2,ATG16L1,RASSF1,RHBDD3,EMILIN1,HSPG2,SLC25A4,POC1B,ATP2C1,LRRK2,DOCK7,PRMT1,NFIB,CBFA2T2,MSN,DDHD2,RAF1,RNF8,MYH9,PRKAB2,MAP6,Ubb,RALGAPB,TMEM38A,KRAS,C21orf2,CCND1,ATP2A2,ADR3,ZFYVE1,KLF7,Diap2,SUMO1,BAIAP2,FBLN1,NEK6,ATF4,RUVBL2,KLF1,MGAT1,ATP5G3,SGSM2,IQGAP3,TP53,GNE,CERS6,ATG5,ESPL1,APPL2,SOGA1,PAM,YAP1,CSNK1D,USP19,TPM3,ANO6,TBK1,KLF13,DDR1,ATF2,SKP2,ATE1,PLEKHG2,PEX2,FSCN1,BTG2,FADS2,TFRC,CHD1L,TBC1D5,PTPRA,XRCC5,PRDX2,FANCM,RAP2A,TRIM33,DEK,PLXNA3,FBXO7,PTPN2,PDS5B,CDK4,CEBPD,PTEN,KIAA1549,SEPT11,SDK1,CEP162,KISS1R,ARF6,MAP4,CD47,SORBS1,ALMS1,SOS1,CSNK2B,CDC5L,POMGNT2,NFE2L2,PEMT,RAD21,CUL7,POLG,LZTS2,TOB1,VDAC3,FRK,LAMB2,PLA2G4A,CCNE1,NR4A2,UBR4,CAPRIN2,CDKN1A,EIF2B1,PSAP,CEP41,TCF7L2,PSEN1,ILF3,NCND,CAMK1D,POLR3E,PARP2,TLN1,NFATC2IP,RNASEH1,TBC1D2,IFT140,MYC,TGFBR2,HSPA4,Gm21596/Hmgbl1,MAP2K2,RCC1,PIM1,WPCP,ARL1,XPO1,Hmga2,MYBL2,GCLM,CHTF18,ULK2,TAB1,PPP1R15B,SYNE2,UBE4B,FSTL3,SIK2,GM2A,DIDO1,ORC6,SLC12A7,RBFOX2,WASF1,HELLS,POFUT1,SNX3,KMT2A,PFKM,METRN,PPP2CB,CDC42BPB,HNRNPAB,TFAM,MATN2,DUSP1,ETV4,TXN2,XRCC6,DIXDC1,HSP90AA1,CAPN2,ACTN4,SSFA2,ELMO1,CDKL3,EEA1,RPSA,RBBP4,RHBDF1,ABI2,PPIB,DPYSL3,UBE2N,RPS6KA3,ATF6,SMAD5,SLC39A14,WDR6,RAD50,STIM2,RAD51,CCNA2,DIAPH1,LYST,WDFY3,FANCD2,TIMP1,NET1,HLA-DMA,BMPR1A,LDB1,FOXO3,TOR1B,MCM9,LRRC8A,RAD23B,PRKCA,KIRREL,CAPZB,SLC12A2,TUBG1,PTRHD1,FOXM1,AMPD2,GIT1,FAIM,NBN,CISD1,RCAN1,SS18L1,PMP22,PRKCI,MAPK14,FOXO1,RAD9A,KIF5B,EHD4,AMIGO1,COX5A,DPY30,PLD2,ABCA2,ITSN1,SGK1,TOR1A,ZNF451,CDKN2C,HES1,RAPH1,RICTOR,CHAF1A,RECQL,VEGFA,CXCL10,GSTZ1,RUSC1,FANCB,DYNLL1,BAG1,TARDBP,USP10,MAP1S,IRS2,CEP250,TXN,HEY2,CENPJ,STAT6,ACTR2,NDRG1,CFL1,CSR1P2,MITF,RPA1,ITPR1,FANCC,IRF1,TERF2,CCNO,PTBP1,DOCK1,PCNA,BSG,GAB1,STIP1,H2AFX,BHLHE40,IRS1,E2F1,HPRT1,RAB11A,MSH5,LRP8,MAPK7,CYR61,IFIT2,EPHA2,PHLPP1,ADAM17,ATF7,PDIA3,HMGN1,CTNNA3,VCAN,SGMS1,CHEK1,EP300,COL5A1,EFNB2,ID1,TRIB1,NCOA2,PRRX1,RHO,PDGFRA,DAP3,CEBPA,LAMP1,BID,PRKCE,MAP1LC3A,MAP1LC3B,MCPH1,POLDIP3,STIM1,HEXIM1,RXRB,NCKIPSD,PLOD3,PLAT,AIFM1,EPG5,MYCN,VPS18,DCK,TBC1D9,INPP5E,ACTB,HERC1,DPAGT1,MAFK,FADD,KITLG,YBX2,DGKZ,KIF15,ABL2,PDXP,SREBF2,NDE1,LIMS1,KIF20B,SPRY2,ADD1,ARAP1,ADAM10,TBPL1,GABPA,FEN1,MAFB,IRES2,PAFAH1B1,SEPT2,WDR19,DYRK1A,PHLDA1,MCM8,PALLD,EPH2,PTPN23,MAPK1,INSIG1,DIAPH3,MM1P16,TAF10,AURKB,LATS2,LMNB1,STMN1,PTK2,ROCK2,FGFR3,SRSF1,TTBK2,RORA,EZH2,NEO1,HTRA2,ARHGEF25,BRCA1,FBXO45,MYO10,KIF14,ULK4,FGFR1,STK11,RAB10,TBP,RAB8A,LMNA,RANBP1,TMOD3,SIPA1L1,CCNT1,RNF4,ARRB2,FLOT2,PCGF1,CORO1B,PKD1,CASP2,LIN9,PTPRS,EXTL3,MTDH,PML,TEAD4,PAFAH1B2,NFIX,GDNF,PICALM,PDGFA,PKM,MARK2,RBBP8,Spg20,ABL1,SLC7A1,BCAR1,PRKAG1,TNFRSF12A,FUT8,EPHB6,NTNG1,TBC1D10A,ROR2,CCDC88A,Ppp1cc,CIT,MICALL1,BLM,CTDNEP1,E2F8,MAP2K7,S1PR2,ATG10,Nedd4,C2CD3,HDAC1,MTMR14,MAPK9,BCL3,USP1,NFKBIZ,HIVEP2,AF11,DNM1,KIF24,UBQLN2,RIPK1,EXOC4,B4GALT1,LPAR1,EIF2AK2,VGF,HMGC,BCL2L1,WNT5A,LGALS1</p> |

## Supplemental Table 7. General IPA functions for E2F1, E2F3A and E2F3B promoter targets

| ChIP-seq | Category             | B-H p-value | Genes                                                                                                                                                                                                                                                                                                                                                                                                                                                                                                                                                                                                                                                                                                                                                                                                                                                                                                                                                                                                                                                                                                                                                                                                                                                                                                                                                                                                                                                                                                                                                                                                                                                                                                                                                                                                                                                                                                                                                                                                                                                                                                                                                                                                                                                                                                                                                                                                                                                                                                                                                                                                                                                                                                                                                                                                                                                                                                                                                                                                                                                        |
|----------|----------------------|-------------|--------------------------------------------------------------------------------------------------------------------------------------------------------------------------------------------------------------------------------------------------------------------------------------------------------------------------------------------------------------------------------------------------------------------------------------------------------------------------------------------------------------------------------------------------------------------------------------------------------------------------------------------------------------------------------------------------------------------------------------------------------------------------------------------------------------------------------------------------------------------------------------------------------------------------------------------------------------------------------------------------------------------------------------------------------------------------------------------------------------------------------------------------------------------------------------------------------------------------------------------------------------------------------------------------------------------------------------------------------------------------------------------------------------------------------------------------------------------------------------------------------------------------------------------------------------------------------------------------------------------------------------------------------------------------------------------------------------------------------------------------------------------------------------------------------------------------------------------------------------------------------------------------------------------------------------------------------------------------------------------------------------------------------------------------------------------------------------------------------------------------------------------------------------------------------------------------------------------------------------------------------------------------------------------------------------------------------------------------------------------------------------------------------------------------------------------------------------------------------------------------------------------------------------------------------------------------------------------------------------------------------------------------------------------------------------------------------------------------------------------------------------------------------------------------------------------------------------------------------------------------------------------------------------------------------------------------------------------------------------------------------------------------------------------------------------|
| E2F3B    | Neurological Disease | 3.12E-11    | NPM1,CTCF,PRKAB1,POLA1,GARS,ELAVL4,POR,SMARCB1,ADA,TCERG1,PLXNB2,SLC2A1,ABCA7,GART,DAXX,DVL2,PRKACA,ALCAM,ECT2,DDIT3,BAG6,GNA11,NOTCH2,PCNXL3,RNF19A,ATN1,SLC12A6,SDHA,EP400,GAS1,TUBB4B,ID3,BAK1,BUB1,MAD2L1,MTHFD1L,MSH2,CSF1,MAZ,TFB1M,CDKN2A,MPRIP,SEPT9,LHX2,YWHAH,TROAP,SMAD3,NUP58,RPGRIP1L,TDP1,SMC1A,RGPD4 (includes others),SOX2,E2F6,MTMR2,EPHA7,STXBP1,HDAC2,DNA2,DYNC1H1,BCL2L1,H3F3A/H3F3B,SLC25A10,MCCC2,PBRM1,LITAF,KIAA0101,PDE4A,E2F3,PDCD10,HDGF,SIX1,NCS1,ERBB2,PDK1,KDM4C,MEF2A,SMARCE1,HERPUD1,SOD1,NFATC4,ALS2,BIRC5,BRCA2,MAP4K4,HNRNPL,CTGF,F2R,FAM20C,MKI67,ARNT,POLB,RNF38,CXorf23,RARA,ZFX,MGAT4B,HIPK1,BAG5,DNMT1,PABPC1,PIK3C2B,NOVA1,TFDP1,YWHAZ,PLEC,HBEGF,SPG7,GRK5,EXOSC8,MON2,AP5Z1,MED12,ARHGAP5,AHI1,RERE,CREM,ARHGAP35,TMEM158,FYN,RREB1,GALC,SNAI2,CDT1,PLAGL1,PTN,POLQ,FKBP1A,BOK,HMGB2,EIF4G1,H2AFZ,XRCC4,HK2,CREB1,IGF1R,MYO1D,CEP152,PMS2,PPIF,ELL,MDM2,SLIT2,CDK1,RRM1,SBF1,SAAL1,NCAM1,WDR48,NAB2,VTI1A,UNC5B,FBXW7,PIGQ,DICER1,ZNF91,YWHAQ,ETS2,ITPRIP,ZNF717,BCKDK,HK1,SOX4,P4HB,STIL,COL4A1,TRIOBP,MARS2,RAC1,ALAD,PREP,PALB2,Cdc42,RHOA,SCRIB,INTU,JAG1,CDK2,CDK5RAP2,PA2G4,NGF,KMT2C,SET,UHRF2,ZNF280B,RASSF1,HSPG2,MTRR,UHRF1,ATP2C1,HSPH1,LRRK2,TSHZ3,SLC25A38,PLEKHG5,TSEN34,NFIB,RAVER1,ADAM9,CBFA2T2,DDHD2,RAF1,KRAS,ASCC2,PANX1,CCND1,ATP2A2,EMG1,DOCK11,KLF7,EGR2,SUMO1,NEK6,ATF4,HIPK2,UNG,PIGT,TP53,CBX8,FBXO9,TYMS,ATG5,YAP1,RRM2,TBK1,ATF2,Marcks,SYNJ2,HSPA8,PEX2,CCNF,BTG2,CLK2,GAPDH,FRG1,XRCC5,TRAPPC5,INF2,PRDX2,HACE1,TRIM33,FBXO7,ARL4C,HNRNPA2B1,PDS5B,CDK4,PSEN2,ALX1,KISS1R,VRK1,TMEM209,CDKN3,MAP4,UBE2K,B3GALNT2,POMGNT2,NFE2L2,RAD21,CYP51A1,TUBGCP6,POLG,HSPA2,PLA2G4A,IGHMBP2,NR4A2,CDKN1A,PSAP,LDHA,CASP7,TCF7L2,MAOA,PSEN1,LRIG2,RPL22,CCDC15,KIF1B,KLF6,ABCC10,TLN1,KNTC1,TGFBR2,MYC,PIM1,MYBL2,GCLM,ULK2,TAB1,CLASP1,SMC3,SBF2,YWHAZ,TNPO1,ORC6,TUSC3,TAF1,ATP5B,DUSP1,XRCC6,CDCA7L,ETV4,AGAP3,LMNB2,ELMO1,RUNX1,ARID1A,DPYSL3,DENND4B,DCAF4,RPS6KA3,SMAD5,ETV6,MLH1,LYST,BMPR1A,TIMP1,LDB1,FOXO3,EYA4,RPS3,CIZ1,PRKCA,POMT2,RFX1,SPG21,SLC12A2,TUBG1,CHERP,SAP130,HSPD1,MTHFD1,FOXM1,ATL3,AMPD2,NBN,FAIM,SH3PXD2A,RCAN1,PMP22,MAPK14,PRKCI,FAM111A,FOXO1,EHD4,MSH6,DCTN1,SH3RF1,ATR,CDC34,WNK1,CENPF,SOCS1,ABCA2,ITSN1,SGK1,CDKN2C,HES1,RAPH1,VEGFA,MXD3,FAM91A1,BAG1,TARDBP,IRS2,CENPJ,KMT2B,UPF2,OTUD4,NDRG1,CFL1,FOXH1,CSR2,PTCH1,ITPR1,TERF2,DOCK1,PATZ1,YARS,STIP1,E2F1,ACY1,HPRT1,MAPK7,EPHA2,Nos1ap,HIST1H1C,SCAP,PDIA3,HMGN1,SETX,EP300,CHEK1,EFNB2,YY1,TCOF1,PRRX1,E2F5,TOP2A,PDGFRA,BID,PRKCE,MCPH1,RASSF5,PCBP2,POT1,PLAT,AIFM1,EPG5,MYCN,C10orf2,INPP5E,HERC1,CDC6,DLX1,POLD1,SIN3A,FADD,KITLG,SF3B2,LIMS1,NDE1,PVT1,SPRY2,MUTYH,PRMT5,RBPJ,PAFAH1B1,PCBP3,DYRK1A,PALLD,TFG,MAPK1,DIAPH3,CLTB,TUBB,LMNB1,ROCK2,FGFR3,USF3,SIVA1,EZH2,ERLIN2,ITGAV,HTRA2,BRCA1,CDC25A,KIF14,FGFR1,TBP,LMNA,GSR,FLOT2,PKD1,TUBE1,CASP2,LIN9,PTPRS,POMT1,PML,ORC4,KIF11,NFIX,GDNF,PDGFA,GTF2F2,PKM,RBBP8,ABL1,TAOK1,ING4,EPHB6,ROR2,GLI3,SP1,MAML3,TCP1,ERF,CTDNEP1,ACTN1,MAP2K7,CKS2,HDAC1,EFNA3,FCHSD2,MAPK9,RPS6KA5,XIAP,RIPK1,LPAR1,SLC25A27,SMA RCC1,VGF,BCL2L11,LGALS1,WNT5A |

## Supplemental Table 7. General IPA functions for E2F1, E2F3A and E2F3B promoter targets

| ChIP-seq | Category                        | B-H p-value | Genes                                                                                                                                                                                                                                                                                                                                                                                                                                                                                                                                                                                                                                                                                                                                                                                                                                                                                                                                                                                                                                                                                                                                                                                                                                                                                                                                                                                                                                                                                                                                                                                                                                                                                                                                                                                                                                                                                                                                                                                                                                                                                                                                                                                                                              |
|----------|---------------------------------|-------------|------------------------------------------------------------------------------------------------------------------------------------------------------------------------------------------------------------------------------------------------------------------------------------------------------------------------------------------------------------------------------------------------------------------------------------------------------------------------------------------------------------------------------------------------------------------------------------------------------------------------------------------------------------------------------------------------------------------------------------------------------------------------------------------------------------------------------------------------------------------------------------------------------------------------------------------------------------------------------------------------------------------------------------------------------------------------------------------------------------------------------------------------------------------------------------------------------------------------------------------------------------------------------------------------------------------------------------------------------------------------------------------------------------------------------------------------------------------------------------------------------------------------------------------------------------------------------------------------------------------------------------------------------------------------------------------------------------------------------------------------------------------------------------------------------------------------------------------------------------------------------------------------------------------------------------------------------------------------------------------------------------------------------------------------------------------------------------------------------------------------------------------------------------------------------------------------------------------------------------|
| E2F3B    | Post-Translational Modification | 3.67E-10    | RAF1,RNF8,TRAIP,TGFBR1,PRKAB2,PRKAB1,KRAS,CCND1,TRIM32,SCO2,PKN2,NUP93,SUMO1,MARCH2,FBLN1,NEK6,VAMP3,PLXNB2,HIPK2,IQGAP3,FXO9,TP53,ATG5,HCFC1,PHIP,PEAK1,SLC2A1,STK25,CSNK1D,NUP107,TBK1,DDR1,SKP2,HSPA8,DAXX,DVL2,CCNF,ST3GAL1,TRPC4AP,CLK2,PHF23,COX18,PRKACA,CELSR3,LTN1,PTPRA,FANCA,MORC3,PCNP,HACE1,TRIM33,RAP2A,PIM3,PTPN2,FBXO7,PRDX1,GNA11,CDK4,CTDSPL,GALNT2,PPIA,UBE2Z,PSEN2,CDK10,VRK1,CD47,TRIM27,IBTK,UBE2K,DAB2,CSNK2B,NFE2L2,UBE3C,CPNA3,MED20,PASK,CUL7,MAPK6,FRK,HSPA2,CCNE1,CSF1,CDKN1A,PSAP,MAP3K3,PSEN1,CDKN2A,SOCS3,ILF3,MPRIIP,SMAD3,SLF2,GNB2L1,NME2,RFWD3,TCEB1,TGFBR2,ZW10,HSPA4,USP8,Gm21596/Hmgb1,KCTD20,SAE1,MAP2K2,PIM1,MAPK3,CACTIN,PDZRN3,ULK2,RNF41,EPHA7,UBE4B,CSNK1G2,SIK2,WEE1,RDX,MAPKAPK5,NDC1,KMT2A,SLC3A2,ARIH1,CAND1,CDC42BPB,TAF1,DUSP1,OXSR1,PKMYT1,KLHL21,UBE2I,PEBP1,UBE2N,BARD1,PIAS1,DNAJC10,SMAD5,EIF2S1,PRR5L,IQGAP1,ETV6,RAD51,BMPR1A,STUB1,HDLA-DMA,ERBB2,STX4,PKD1,RPS3,GMFB,PRKCA,BTBD10,MED18,KIRREL,CAPZB,CHP1,HERPUD1,TUBGCP2,BIRC5,UBE2D1,FANCL,SLK,PSKH1,MAPK14,PRKCI,ATR,CDC34,WNK1,MAP4K4,SOCS1,CTGF,F2R,SGK1,FAM20C,UBR2,CDKN2C,HES1,RICTOR,CHAF1A,VEGFA,RNF38,RUSC1,DYNLL1,CD2AP,CTDSP1,BAG1,RARA,TARDBP,CBFB,HIPK1,BAG5,ANAPC11,MOB1B,NDUFAF5,CFL1,MITF,GRK5,TFAP4,HMGA1,FANCC,MED12,DOCK1,RNF168,BSG,IRS1,NCLN,AHCTF1,HPRT1,CLSPN,MAPK7,CYR61,PRICKLE1,PHLPP1,CAPZA1,FYN,ADAM17,PDIA3,UVSSA,PTN,CUL1,FKBP1A,STRA13,FZD1,RCHY1,DNAJA1,SF3B3,EP300,AKAP11,CHEK1,EIF4EBP1,EFNB2,CHAF1B,CREB1,HUS1,IGF1R,PDGFRA,PRKCE,NUP205,HEXIM1,RASSF5,PCBP2,NSMCE1,SLC7A6,AIFM1,JKAMP,PLK1,MDM2,SLIT2,CDK1,KITLG,DGKZ,SPIDR,NUP153,ABL2,CAMKK1,RNF187,ADAM10,ADD1,DYRK1A,NCAM1,PRPF19,MAPK1,VPS28,PRMT3,Wasl,FNIP2,FBXW7,MELK,DICER1,LATS2,AURKB,PBK,ROCK2,PTK2,FGFR3,CAMK2D,SCARB1,TTBK2,DZIP3,EZH2,Map3k7,DARS,SIAH2,BCKDK,FBXO45,BRCA1,APITD1/APITD1-CORT,HK1,SOX4,TRAF3IP1,STK11,FGFR1,RAC1,PSMC4,BIRC6,DGUOK,ELF1,WWP2,EPRS,CCNT1,HERC2,Cdc42,ARRB2,RNF4,BRAT1,ERP29,PKD1,PTP,RS,NUAK1,MAP4K5,PML,Paxip1,CDK2,MED23,CCNC,PICALM,MARK2,ABL1,TNFAIP3,TAOK1,NGF,PRKAG1,EPHB6,CCDC88A,TRIM24,UHRF2,GMNN,GTPBP4,MAPKAPK2,DTL,RASSF1,NDUFAF3,UBR5,MAP2K7,UHRF1,Nedd4,SMAD7,RNF126,MAPK9,LRRK2,RPS6KA5,MED6,MARCH5,UBE2T,XIAP,FAF1,RIPK1,FASTK,EIF2AK2,TRIM59,WNT5A,LGALS1,GSG2,MCM7 |



## Supplemental Table 7. General IPA functions for E2F1, E2F3A and E2F3B promoter targets

| ChIP-seq | Category               | B-H p-value | Genes                                                                                                                                                                                                                                                                                                                                                                                                                                                                                                                                                                                                                                                                                                                                                                                                                                                                                                                                                                                                                                                                                                                                                                                                                                                                                                                                                                                                                                                                                                                                                                                                                                                                                                                                                                                                                                                                                                                                                                                                                                                                                                                                                                                                                                                                                                                                                                                                                                                                                                                                                                                                                                                                                                                                                                                                                                                                                                                                                                                                                                                                                                                                                                                                                                                                                                                                                                                                                                                                                                                                                                                                                                                                                                                                                                                                                                                                                                                                                                                                                                                                                                                                                                                                                                                                                                                                                                                                                                                                                                                                                                                                                                                                                                                                                                                                                                                                                                                                                                                                                                                                                                                                                                                                                                                                                                                                                                                                                                                                                                                                                                                                                                                                                                                                                                                                                                                                            |
|----------|------------------------|-------------|----------------------------------------------------------------------------------------------------------------------------------------------------------------------------------------------------------------------------------------------------------------------------------------------------------------------------------------------------------------------------------------------------------------------------------------------------------------------------------------------------------------------------------------------------------------------------------------------------------------------------------------------------------------------------------------------------------------------------------------------------------------------------------------------------------------------------------------------------------------------------------------------------------------------------------------------------------------------------------------------------------------------------------------------------------------------------------------------------------------------------------------------------------------------------------------------------------------------------------------------------------------------------------------------------------------------------------------------------------------------------------------------------------------------------------------------------------------------------------------------------------------------------------------------------------------------------------------------------------------------------------------------------------------------------------------------------------------------------------------------------------------------------------------------------------------------------------------------------------------------------------------------------------------------------------------------------------------------------------------------------------------------------------------------------------------------------------------------------------------------------------------------------------------------------------------------------------------------------------------------------------------------------------------------------------------------------------------------------------------------------------------------------------------------------------------------------------------------------------------------------------------------------------------------------------------------------------------------------------------------------------------------------------------------------------------------------------------------------------------------------------------------------------------------------------------------------------------------------------------------------------------------------------------------------------------------------------------------------------------------------------------------------------------------------------------------------------------------------------------------------------------------------------------------------------------------------------------------------------------------------------------------------------------------------------------------------------------------------------------------------------------------------------------------------------------------------------------------------------------------------------------------------------------------------------------------------------------------------------------------------------------------------------------------------------------------------------------------------------------------------------------------------------------------------------------------------------------------------------------------------------------------------------------------------------------------------------------------------------------------------------------------------------------------------------------------------------------------------------------------------------------------------------------------------------------------------------------------------------------------------------------------------------------------------------------------------------------------------------------------------------------------------------------------------------------------------------------------------------------------------------------------------------------------------------------------------------------------------------------------------------------------------------------------------------------------------------------------------------------------------------------------------------------------------------------------------------------------------------------------------------------------------------------------------------------------------------------------------------------------------------------------------------------------------------------------------------------------------------------------------------------------------------------------------------------------------------------------------------------------------------------------------------------------------------------------------------------------------------------------------------------------------------------------------------------------------------------------------------------------------------------------------------------------------------------------------------------------------------------------------------------------------------------------------------------------------------------------------------------------------------------------------------------------------------------------------------------------------------------------------------|
| E2F3B    | Hepatic System Disease | 5.28E-10    | GARS, TLE1, FRMD6, TMEM231, TRIM32, POR, PPRC1, GORASP2, SMARCB1, ADA, SART3, RELT, TMEM67, ZBTB5, TANC1, HIST1H2BM, DVL2, EYA3, ALCAM, ELM O2, DDIT3, SLC1A5, CDK10, TIPARP, IBTK, RNF19A, ATN1, SLC12A6, UBE3C, SDHA, VPS16, IPO7, ID3, KPNB1, BUB1, MTHFD1L, AP1G1, CDKN2A, EEF1A1, TROAP, I NTS1, LHFPL2, MTMR2, PGM1, PTPDC1, PHRF1, DYNC1H1, BCL2L1, KIAA0895L, H3F3A/H3F3B, SEC61A2, CBX3, MCCC2, ZC3H7B, HPS5, RAB23, KLF10, ZBTB2, LS M2, C16orf59, NCS1, ILKAP, IGSF8, FRA10AC1, GALNT9, MEF2A, HERPUD1, SOD1, SNX27, FRMD4A, PPM1G, HTATSF1, CENPI, TFCP2, ING1, MAP4K4, RPLP0, MCM 6, ASPSCR1, UBR2, FAM20C, ZNF628, FNDC3B, RRAGB, WBSCR17, ADIPOR1, PPP1R21, RNF38, RASGRF1, RAB17, TDP2, PRIM2, CCNT2, UAP1, SPECC1L, PABPC 1, NOVA1, HIRA, PLEC, AGFG2, AP5Z1, TTLL9, MEX3A, SUCO, RNF168, PHLDB1, C11orf30, NCLN, RCBTB1, KIAA0368, ARHGAP35, SNAI2, GALC, NCAPD3, PTPN13, PLAGL1, SPATA13, FKBP1A, DNAJA1, TOR1AIP1, TYW1, NEIL3, HK2, RINT1, TICRR, RFC2, IGF1R, TXNL1, TCTN3, VCL, ZNF25, PSMB9, MCMBP, NUP85, CEP152, ST AMBPL1, BANP, PLK1, ACLY, F3, NCAPG2, RRM1, NUDT5, ZNF546, SBF1, ZNF507, TRERF1, COBLL1, NCAM1, FMNL3, ATRIP, FBXW7, DHODH, ZNF91, FAM208A, TB C1D4, ESPN, KHNYN, DZIP3, ZNF717, TFDP2, RPRD2, PANK4, FAM193A, STIL, COL4A1, CLTC, BIRC6, DTNB, ATP10A, ALAD, WHSC1L1, BRAT1, COL6A3, IFT81, SCR IB, C15orf41, RCE1, KBTBD8, FADS1, LRIG3, ZMIZ1, TRIM24, USP47, RPAIN, TMEM220, LRRK2, PFKP, TCF7L1, TSHZ3, ZNF382, FAF1, KIAA1033, TSEN34, PAN3, ZDH HC12, MTRF1L, USP34, RAF1, IQCK, HMMR, RALGAPB, ASCC2, SLC35C1, FAM208B, ATP2A2, RNASE4, ADH5, DOCK11, RCL1, CCDC122, CENPE, WDR47, MGAT1, S GSM2, GNE, TYMS, CBX8, ASF1B, PHIP, PAPD4, ESPL1, YAP1, APPL2, PAM, EEF2, ZBTB43, MDM1, WDR81, ZNF496, ATE1, AGPAT4, PLEKHG2, MORC2, ATXN7L3, MI DN, ST3GAL1, GTSE1, ANAPC5, VPS37B, ZNF644, CENPT, CHD1L, PTPRA, TRAPP5, INF2, FANCM, HACE1, FAM188B, ERCC4, FBXO10, PTPN2, HNRNPA2B1, ODF 2L, CDK4, KIAA0754, PRPF4, PGS1, LRRFIP1, SDK1, CDKN3, TMEM209, NAA15, TMEM260, ALG8, ASPH, NFE2L3, RAD21, CYP51A1, ESCO1, FBXO21, SLC35A5, CCD C57, ZMYM1, KLHDC2, WIPF2, TUBGCP6, LZTS2, ING5, LARP4B, NCAPD2, SLC29A1, IGHMBP2, CCNE1, ZFPM2, UBR4, DDX39B, ABCF2, EIF4A1, CDKN1A, ZFHX2, P SAP, CEP112, LDHA, PPIL1, ID4, TCF7L2, MAOA, PSEN1, LRIG2, MEGF9, CAMK1D, MSH3, KIF1B, TSFM, ABCC10, PIEZO1, MYC, TGFB2, SMPD4, AHDC1, GDE1, SU GT1, CACTIN, EIF4B, CLASP1, SPECC1, TEX264, CCDC18, FSTL3, C3orf58, KANK2, ENDOD1, PSMD6, B3GALNT1, TUSC3, TBL1X, ARIH1, CDC42BPB, HNRNPAB, TA F1, UGP2, XRCC6, ETV4, SEPT10, SMCHD1, MAD1L1, RUSC2, HSP90AA1, NCKAP5L, SSFA2, FAM83D, RBBP4, DPYSL3, UBE2N, RPS6KA3, DNAJC10, NEURL4, WD R6, VPS4A, IGF2BP1, RAD50, STIM2, CCNA2, LYST, AHNAK, TIMP1, NOP58, MEX3B, ACO1, VARS, CIZ1, LRRC8A, POMT2, RFX1, HAUS8, AP1S2, CHERP, RALY, ZFPL 1, NMT2, HSPD1, NFKBIL1, MTHFD1, FAIM, SH3PXD2A, SLK, MAPK14, PHF19, PSMD2, LSM11, C5orf22, SGK1, APIP, SFPQ, ZNF451, RICTOR, KPNA1, RECQL, CHST2, VEGFA, NCOA7, DYNLL1, TTF2, HNRNPUL1, SEC24A, TMEM55B, NAT10, RCBTB2, ITPR1, PLCL2, FANCC, UBQLN4, TERF2, DOCK1, YARS, YTHDF3, CPNE8, IRS1, B HLHE40, E2F1, RGL2, LRP8, HELB, CD2BP2, VASH2, PKD2, SASS6, VCAN, XYLB, BCDIN3D, TRIB1, WDFY1, NCOA2, POLR2M, SLC6A17, DAP3, E2F5, MAP1LC3B, LP P, NCKIPSD, PLOD3, BRMS1L, RAD51B, HNRNPDL, ATXN2L, PCDH9, SIN3A, KIF15, ABL2, RBM6, HEATR5A, NCOR2, ZFP36L2, USP49, FZR1, ANKS1B, INSIG1, DIAP H3, FNIP2, CCNL1, USF3, DPY19L4, MBNL3, LARS, UBXLN4, EZH2, ALG6, DARS, NIPBL, HTRA2, MYO10, PMPCA, RASAL2, FGFR1, LMNA, MARS, GSR, ARRB2, PLEKH H2, ITPRIPL1, PTPRS, MAP4K5, PFAS, PML, BCL9L, RFC3, KDM3B, TEAD4, TNRC6B, ZBTB7A, MED23, GTF2F2, MARK2, ING4, GANAB, SP1, CIT, RABGGTB, LTBP4, A TG16L2, ZNHIT2, TM9SF1, MAP2K7, CKS2, MRC2, DCTPP1, let-7, RPS6KA5, KIAA2026, KIF24, PPP6R1, B4GALT1, PANK3, WRB, PAQR4, TONSL, HMGCR, SLC9A8, DPY19L3, BCL2L11, MCM7, NPM1, mir-130, RPE, POLA1, TAB2, CCNB2, GPSM2, MAP1A, DUSP11, HCF1, SLC2A1, NPAT, TCF3, RGP1, ABCA7, SP4, DAXX, CNTRL, ITPR3, C3orf67, ECT2, CCDC138, FLNB, NRG2, PRDX1, BAG6, CEBPZ, TTK, PNRC1, CDC20B, HEXB, C2CD5, SCFD1, TUBB4B, ZNF521, MAPK6, GREM1, SPSB4, KAT5, IGF2R, MCM3, MSH2, CSF1, TFB1M, KA NSL2, KIF23, NAV2, SOCS3, MPRIP, YWHAH, PCDH18, GNPAT, NUP58, ZFPM1, RPGRIP1L, ECD, PPFIBP1, SOX2, TSEN15, ARHGAP20, SEC63, EPHA7, OSBPL1A, S TXBP1, POLE4, SESN3, HDAC2, POLR1B, IARS2, WEE1, IFT74, DNA2, H6PD, TXNRD1, OSBPL8, KIAA0907, SF3B4, PBRM1, PVRL3, MCM3AP, RBBP5, IQGAP1, NFAT 5, ERBB2, VAV2, NDUFV1, ADAM15, PSMC3IP, TSN, ALS2, UMPS, BIRC5, MTO1, SLC36A4, CKS1B, ZDHHC3, BRCA2, CCP110, RTCB, MTBP, RAN, GHITM, MKI67, ARN T, ATP1A1, RARA, MED16, SLC39A13, BAG5, RTEL1, CNOT1, PTPRG, MMAB, MDC1, MON2, ADAR, MED12, ANKRD26, FARSA, ARHGAP5, FUT10, AAAS, MYO9A, AHI 1, DNAJC14, ME2, CLCC1, PRICKLE1, SQLE, RREB1, MAP2, CEP78, ARHGEF7, POLQ, TRPT1, PITRM1, AAMP, KANSL3, ANKRD12, EAF1, ATAD5, CDH11, TIGD5, AKA P11, DIS3L2, RAB33B, CREB1, NUP205, ZCCHC6, POLE, PAICS, TIAL1, MDM2, SLIT2, SCMH1, CNKSR3, C1orf159, SCAF11, GLTP, SPIDR, INTS6, GMPS, ATL2, GTPBP 3, REV1, H2AFY, UBN1, BTBD7, FARP1, ARF1, PRMT3, GXYLT1, UNC5B, ZNF609, DICER1, RELL1, CAMK2D, ZNF318, SCARB1, STAG1, FASN, ABLIM2, CDCA3, STX11 , HK1, SOX4, P4HB, TRIOBP, DTNBP1, DCTN4, POLE2, USP38, PREX2, MUT, GPAA1, HERC2, ANKRD10, NASP, CTDP1, LUC7L2, LOXL1, NUAK1, SBNO2, JAG1, CDK2, ARL2, KDM3A, BRD2, SRM, C5orf42, PA2G4, AGAP1, SRRT, WDHD1, KMT2C, GTF2B, FAM13B, IFRD1, NCL, YLPM1, IPO5, ATG16L1, RHBDD3, RASSF1, UBR5, HSPG2 , MTRR, TTC13, TRA2B, PANK2, POC1B, COTL1, HSPH1, METTL1, SAP25, DOCK7, C19orf68, CIART, PIAS3, MAP7D1, U2SURP, PLEKHG5, IQCE, NFIB, ADAM9, GRPE L1, CBFA2T2, CENPH, CASP8AP2, PRKAB2, PCIF1, KRAS, TOMM70A, CCND1, PKN2, SNRNP48, PAN2, NEK6, ZNF687, HIPK2, MSTO1, IQGAP3, ALDH7A1, TP53, FBX |

## Supplemental Table 7. General IPA functions for E2F1, E2F3A and E2F3B promoter targets

| ChIP-seq | Category            | B-H p-value | Genes                                                                                                                                                                                                                                                                                                                                                                                                                                                                                                                                                                                                                                                                                                                                                                                                                                                                                                                                                                                                                                                                                                                                                                                                                                                                                                                                                                                                                                                                                                                                                                                                                                                                                                                                                                                                                                                                                                                                                                                                                                                                                                                                                                                    |
|----------|---------------------|-------------|------------------------------------------------------------------------------------------------------------------------------------------------------------------------------------------------------------------------------------------------------------------------------------------------------------------------------------------------------------------------------------------------------------------------------------------------------------------------------------------------------------------------------------------------------------------------------------------------------------------------------------------------------------------------------------------------------------------------------------------------------------------------------------------------------------------------------------------------------------------------------------------------------------------------------------------------------------------------------------------------------------------------------------------------------------------------------------------------------------------------------------------------------------------------------------------------------------------------------------------------------------------------------------------------------------------------------------------------------------------------------------------------------------------------------------------------------------------------------------------------------------------------------------------------------------------------------------------------------------------------------------------------------------------------------------------------------------------------------------------------------------------------------------------------------------------------------------------------------------------------------------------------------------------------------------------------------------------------------------------------------------------------------------------------------------------------------------------------------------------------------------------------------------------------------------------|
| E2F3B    | Protein Synthesis   | 5.83E-10    | RAF1,NPM1,RNF8,TGFBR1,MYH9,PCBP1,RBM3,KRAS,EIF4A2,ELAVL4,CCND1,SCO2,TRIM32,EIF3B,NUP93,RBM4B,SUMO1,NEK6,VAMP3,ATF4,HIPK2,TARBP2,TP53,HCFC1,ESPL1,SLC2A1,PAM,EEF2,CSNK1D,NUP107,USP19,TBK1,MAN1A2,TCF3,RBM4,SKP2,HSPA8,EIF4H,MRPL17,BTG2,TRPC4AP,PRKACA,COX18,GAPDH,CAPN7,SAMD4A,FANCA,SPPL2A,MORC3,EIF4EBP2,FBXO7,PTPN2,DDIT3,BAG6,CDK4,PSEN2,FBXL4,NAA15,NECAB3,TRIM27,TIPARP,UBE2K,HEXB,ASPH,DHX9,KPNA3,STT3B,STX12,KHDRBS1,PASK,MRPL12,TOB1,LARP4B,HNRNPD,NXF1,BAK1,MAD2L1,ZFPM2,DDX39B,CSF1,EIF4A1,EIF2B1,CASP7,PSEN1,CDKN2A,EEF1A1,SOCS3,ILF3,SLF2,SMAD3,GNB2L1,TSFM,TGFBR2,MYC,ZW10,EIF3D,PIM1,MAPK3,XPO1,SUGT1,DPM3,EIF4B,STXBP1,UBE4B,HDAC2,CSNK1G2,RDX,MAPKAPK5,SNX3,EIF4E2,TBL1X,NDC1,KMT2A,ARIH1,BCL2L1,TAF1,AGBL3,AGAP3,CAPN2,RNF149,FAM83D,UBE2I,Rplp1 (includes others),PPIB,RAB23,UBE2N,ABCF1,INPPL1,ATF6,PDCD10,EIF2S1,VPS4A,IGF2BP1,DIAPH1,STUB1,HLA-DMA,FOXO3,ERBB2,STX4,PKD1,ACO1,RPS3,LONP1,PRKCA,SDC1,CAPZB,IFT46,ADAM15,CHP1,MEF2A,HERPUD1,CANX,RPL23,HSPD1,SOD1,CNOT8,TUBGCP2,UBE2D1,AMPD2,PPM1G,MAPK14,FOXO1,PSMD2,QRSL1,ATR,HNRNPL,SOCS1,SGK1,UBR2,HES1,RICTOR,EIF6,RBL1,Rpl29 (includes others),RAD23A,CHAF1A,VEGFA,CD2AP,BAG1,RARA,DNMT1,TIMP2,PABPC1,CNOT1,STAT6,NDUFAF5,MITF,COPS5,SYNCRIP,TFAP4,HMGA1,FANCC,UBE2G2,PTBP1,DOCK1,RNF168,PPP2R3A,STIP1,IRS1,ACY1,NCLN,AHCTF1,KIAA0368,MRPL41,CLSPN,MAPK7,PHLPP1,CAPZA1,FYN,ADAM17,PDIA3,CRTAP,FKBP1A,CCAR2,PITRM1,MRPL39,EIF4G1,H2AFZ,SF3B3,EP300,EIF4EBP1,SPPL2B,DHPS,NCOA2,CHAF1B,CREB1,EIF3A,LAMP1,PRKCE,POLDIP3,NUP205,PP5,SLC7A6,PLAT,AIFM1,ADRM1,BANP,AZIN1,AGO2,PLK1,MDM2,CDK1,FADD,EIF3G,YBX2,SENP1,SPIDR,NUP153,CIRBP,ADAM10,ADD1,IREB2,DYRK1A,NCAM1,FZR1,MAPK1,VPS28,MMP16,DIAPH3,Wasl,METAP1,FMIP2,FBXW7,PIGQ,DICER1,PBK,LOC102724828/MRPL23,METAP2,CAMK2D,SERP1,UBXN4,RPS20,TTBK2,RPL19,DARS,SIAH2,HTRA2,NAA16,PMPCA,Fus,HK1,SOX4,CDC37,TRAF3IP1,PSMF1,PSMC4,MARS,EPRS,PREP,Cdc42,ARRB2,FLOT2,PKD1,CASP2,USE1,EIF4A3,RCE1,MRPL3,PML,CDK2,RPL13A,CNBP,TNRC6B,PICALM,TNFAIP3,SLC7A1,TBC1D10A,IPO9,UHRF2,TRIM24,SP1,GMNN,LTBP4,GTPBP4,MAPKAPK2,NCL,RASSF1,RHBDD3,DTL,NACA,NDUFAF3,UBR5,HSPG2,Nedd4,HDAC1,C2CD3,SMAD7,let-7,LRRK2,BCL3,NXT1,NDUFA13,XIAP,CDKN2AIP,FAF1,RPS27L,EIF2AK2,UBC,ADAM9,WNT5A |
| E2F3B    | Respiratory Disease | 2.13E-09    | mir-130,NPM1,RAF1,MYH9,TGFBR1,CTCF,PCBP1,NUP133,SSBP2,CCNB2,EIF4A2,KRAS,STK35,CCND1,POR,COPS6,NEK6,HIPK2,TARBP2,TP53,SERBP1,TYMS,PHIP,GRM8,RRM2,DDR1,DCLRE1A,SKP2,GART,ITPR3,ALCAM,ECT2,PRDX2,HACE1,DDIT3,PRDX1,PRDX4,GNA11,ODF2L,CDK4,EEF1B2,PPIA,PSEN2,MEED28,KISS1R,MAP4,NOTCH2,ARF6,PRR14L,IRF2BPL,GPC6,NFE2L2,RAD21,ATN1,SLC12A6,DHX9,EP400,GAS1,TUBB4B,LZTS2,TPK1,SLC29A1,BUB1,PLA2G4A,MAD2L1,NR4A2,MSH2,CSF1,EIF4A1,SLC29A2,CDKN1A,LDHA,CDKN2A,EEF1A1,RPL22,CBWD1,PRELID3B,SMAD3,GNPAT,GNB2L1,PINX1,RGPD4 (includes others),SMC1A,MYC,TGFBR2,SOX2,FDFT1,RCC1,MLEC,SMC3,POLE4,SYNE2,YWHAE,MYEF2,HDAC2,DNA2,HELLS,BUB1B,CDCA2,PFKM,KIAA0907,BCL2L1,TFAM,TAF1,SEC61A2,MAD1L1,HSP90AA1,RUNX1,PBRM1,ARID1A,PDE4A,EIF2S1,MLH1,TARBP1,CCNA2,FANCD2,AHNAK,TIMP1,FOXO3,ERBB2,CIZ1,ADAM15,TUBG1,RALY,HSPD1,FOXM1,G3BP1,BIRC5,FANCL,NBN,RNF44,MAPK14,PRKCI,PHF19,KLF5,MSH6,CKS1B,PAPD7,BRCA2,ATR,WNK1,MAP4K4,DDX11,CCP110,DNAJB4,CDKN2C,HES1,MKI67,RBL1,ADIPOR1,RPS11,XRCC1,VEGFA,RARA,TDP2,CBFB,PRIM2,DNMT1,KMT2B,PABPC1,STAT6,NDRG1,COPS5,C1orf74,YWHAZ,TFAP4,ITPR1,AGFG2,AP5Z1,IRF1,SPOP,ARHGAP5,PCNA,RFC4,E2F1,ARHGAP35,CYR61,YEATS4,HIST1H1C,ADAM17,PDIA3,PTN,POLQ,FNTB,EIF4EBP1,EP300,ID1,HK2,SCAF4,NCOA2,RINT1,DGCR8,TOP2A,CEBPA,IGF1R,PDGFRA,EIF3A,PRKCE,MAP1LC3A,CACNB2,RASSF5,RXRB,MMP17,PSMB9,mir-199,DCK,TBX3,CDC6,POLE,AGO2,TIAL1,MDM2,PLK1,SLIT2,ACLY,C1orf159,F3,SCAF11,SIN3A,CDK1,CBLN1,RRM1,FADD,MCM2,CTNBL1,H2AFY,MUTYH,UBN1,MAFB,TRERF1,DNPH1,ZFP36L2,NCAM1,TAF15,FZR1,NAB2,PHLDA1,PRPF19,MMP16,FBXW7,DICER1,TUBB,AURKB,STMN1,PTK2,FGFR3,DPY19L4,SRSF1,STAG1,ASXL2,FASN,EZH2,ZNF717,ITGAV,SLC7A5,BRCA1,AIM1,SOX4,IGFBP6,P4HB,LMLN,POLE2,FGFR1,STK11,TBP,RAC1,ATP10A,HERC2,ARRB2,TUBE1,SCRIB,MAP4K5,MTDH,AK2,BCL9L,KIF11,SRM,TNRC6B,PKM,MARK2,ABL1,RBBP8,TAOK1,ING4,KMT2C,PDP2,FUT8,EPHB6,POLR2A,RABGGTB,NCL,RASSF1,NACA,CKS2,GLS,HDAC1,let-7,LRRK2,PPP4R3A,PFKP,MTAP,XIAP,TSHZ3,FDPS,ENO1,ADAM9,BCL2L1,SHMT2,MSN,LGALS1,WNT5A                                                                                                                                                                                                                                             |

## Supplemental Table 7. General IPA functions for E2F1, E2F3A and E2F3B promoter targets

| ChIP-seq | Category               | B-H p-value | Genes                                                                                                                                                                                                                                                                                                                                                                                                                                                                                                                                                                                                                                                                                                                                                                                                                                                                                                                                                                                                                                                                                                                                                                                                                                                                                                                                                                                                                                                                                                                                                                                                                                                                                                                                                                                                                                              |
|----------|------------------------|-------------|----------------------------------------------------------------------------------------------------------------------------------------------------------------------------------------------------------------------------------------------------------------------------------------------------------------------------------------------------------------------------------------------------------------------------------------------------------------------------------------------------------------------------------------------------------------------------------------------------------------------------------------------------------------------------------------------------------------------------------------------------------------------------------------------------------------------------------------------------------------------------------------------------------------------------------------------------------------------------------------------------------------------------------------------------------------------------------------------------------------------------------------------------------------------------------------------------------------------------------------------------------------------------------------------------------------------------------------------------------------------------------------------------------------------------------------------------------------------------------------------------------------------------------------------------------------------------------------------------------------------------------------------------------------------------------------------------------------------------------------------------------------------------------------------------------------------------------------------------|
| E2F3B    | Cellular Movement      | 2.17E-09    | mir-130,RAF1,NPM1,MYH9,TGFBR1,RALGAPB,KRAS,FRMD6,CCND1,PKN2,FHL2,KIF13A,NEK6,FBLN1,HIPK2,AHICY,ETS1,TP53,YAP1,SLC2A1,STK25,CRKL,TMEM201,RRM2,ZFYVE21,TCF3,PTP4A1,MASTL,DDR1,SKP2,DVL2,FSCN1,PRKACA,ALCAM,ECT2,PTPRA,INF2,KIF20A,RAP2A,FLNB,PTPN2,SNX17,HNRNPA2B1,GALNT2,SEPT11,ALX1,NAA15,KISS1R,APPL1,ARF6,NOTCH2,SOS1,DAB2,NFE2L2,SLC12A6,LZTS2,FRK,NR4A2,CSF1,CDKN1A,LDHA,ID4,KIF23,CDKN2A,ILF3,SEPT9,SMAD3,KLF6,GNB2L1,NME2,HDAC10,CBX5,SOX2,TGFBR2,MYC,Gm21596/Hmgb1,MAP2K2,PIM1,JUND,TAB1,SYNE2,HDAC2,DIDO1,RBFOX2,BCL2L1,CDC42BPB,HNRNPAB,ETV4,HSP90AA1,CAPN2,KLHL21,ACTN4,ELMO1,RPSA,PEBP1,TNFAIP8,RPS6KA3,IQGAP1,PTGES3,IGF2BP1,ETV6,HGDF,CCNA2,DIAPH1,NFAT5,AHNAK,NET1,TIMP1,FOXO3,ZNF24,STX4,ERBB2,LASP1,PRKCA,SDC1,ADAM15,RPRD1B,RACGAP1,SLC12A2,FOXM1,BIRC5,GIT1,I VNS1ABP,MAPK14,PRKCI,FOXO1,RAD9A,BRCA2,WISP1,WNK1,MAP4K4,SOCS1,CCP110,PLD2,CTGF,F2R,DSTN,DNAJB4,FNDC3B,HBP1,RICTOR,CXCL10,VEGFA,CD2AP,RASGRF1,IRS2,FRS2,CENPJ,TIMP2,CFL1,NDRG1,MITF,CENPB,SEPT7,PLEC,HBEGF,CKAP2,TFAP4,HMGA1,PTBP1,DOCK1,GAB1,RFC4,B SG,BHLHE40,AHCTF1,RAB11A,ARHGAP35,MAPK7,CYR61,IFIT2,EPHA2,FYN,ADAM17,SNAI2,ARHGEF7,FKBP1A,CNTROB,CDH11,VCAN,ID1,YY1,PRRX1,T OP2A,PDGFRA,E2F5,IGF1R,EIF3A,PRKCE,PPM1F,VCL,HEXIM1,LPP,PLOD3,PLAT,MYCN,miR-199,DCK,PPIF,SUZ12,TBX3,ACTB,CDC6,AGO2,PLK1,MDM2,SLIT2,F3,CDK1,RRM1,FADD,KITLG,SENP1,ABL2,PDXP,KIF20B,SPRY2,CAP1,HOXB9,BTBD7,PAFAH1B1,SEPT2,EPS15,PALLD,PTPN23,MAPK1,MMP16,DIAPH3,UNC5B,DICER1,AURKB,LATS2,AMD1,YWHAQ,PTK2,STMN1,SERP1,RORA,ETS2,EZH2,RAB11FIP1,ITGAV,BRCA1,DLC1,SOX4,KIF14,STK11,FGFR1,BIRC6,RAC1,LMNA,SSRP1,Cdc42,RHOA,SCRIB,NUAK1,PDLIM1,MTDH,PML,INCENP,ZBTB7A,GDNF,PA2G4,PDGFA,PICALM,PKM,Spg20,ABL1,NGF,BCAR1,TCF12,FUT8,EPHB6,CCDC88A,SP1,CIT,MAPKAPK2,RASSF1,MRC2,HDAC1,let-7,SMAD7,PRKAR2A,HDLBP,XIAP,PRMT1,DNM1,GNAI2,FAF1,LPAR1,SATB1,ACAT1,EIF2AK2,ADAM9,MSN,WNT5A,LGALS1 |
| E2F3B    | Cardiovascular Disease | 2.69E-09    | RAF1,NPM1,MYH9,SSBP2,KRAS,CCND1,ADRB3,POR,SMARCB1,ATF4,KLF1,MGAT1,PIGT,TP53,TYMS,SLC2A1,RRM2,TCF3,DDR1,ATF2,DAXX,ALCAM,TFR C,CPOX,FANCA,PRDX2,FANCM,ERCC4,FLNB,TRIM33,DDIT3,PTPN2,PRDX1,CDK4,KIAA1549,NOTCH2,CD47,ARF6,PNRC1,DIS3,NFE2L2,RAD21,SLC12A6,S DHA,EP400,TUBB4B,RPS10,IGF2R,BAK1,BUB1,CCNE1,MSH2,CDKN1A,PLXDC1,ACTL6A,CDKN2A,LHX2,KIF1B,SMAD3,ZFPM1,PINX1,PIEZO1,DEPDC5,CEB PG,TGFBR2,MYC,E2F6,Gm21596/Hmgb1,MAP2K2,PIM1,PPP3R1,BRIP1,EPHA7,SMC3,POLE4,HDAC2,DIDO1,SLC12A7,BUB1B,KMT2A,TXNRD1,BCL2L1,NT5 C3A,ETV4,RECQL4,MAD1L1,HSP90AA1,FOXP4,RUNX1,PBRM1,PDCD10,MLH1,ETV6,ARFRP1,DIAPH1,NFAT5,FANCD2,BMPR1A,FOXO3,ERBB2,SLC20A1,T UBG1,SOD1,NFATC4,FANCL,NBN,MAPK14,MSH6,BRCA2,ATR,SGK1,CDKN2C,MKI67,RICTOR,ARNT,VEGFA,FANCB,RARA,CBFB,DNMT1,PIK3C2B,TFDP1, PTCH1,FANCC,IRF1,CDAN1,E2F1,HELB,CTC1,SNAI2,ATF7,PTPN13,HMGN1,CRLF2,EP300,STOM,RINT1,ADK,IGF1R,PDGFRA,TOP2A,CACNB2,RXR, EED,MYCN,RPS19,PMS2,POLE,MDM2,PLK1,SLIT2,CDK1,RRM1,KITLG,FADD,SENP1,ABL2,GMPS,MUTYH,ADD1,ZFP36L2,IREB2,RPL11,MAPK1,DICER1,TUBB,P TK2,SCARB1,STAG1,EZH2,BRCA1,RAD51C,DLC1,HK1,STIL,POLE2,STK11,FGFR1,RAC1,PREX2,TMOD3,MUT,GSR,PALB2,Cdc42,TUBE1,SH2B3,C15orf41,C YLD,SPTAN1,JAG1,PML,CDK2,PKNOX1,PICALM,ABL1,SLC7A1,TNFAIP3,KMT2C,PRKAG1,TRIM24,GLI3,SIPA1,ERF,BLM,MTRR,HDAC1,NFKBIZ,IPP,AFF1,S LC25A38,YARS2,LPAR1,PDE5A,MSN                                                                                                                                                                                                                                                                                                                                                                                                                                                                                                                       |

## Supplemental Table 7. General IPA functions for E2F1, E2F3A and E2F3B promoter targets

| ChIP-seq | Category              | B-H p-value | Genes                                                                                                                                                                                                                                                                                                                                                                                                                                                                                                                                                                                                                                                                                                                                                                                                                                                                                                                                                                                                                                                                                                                                                                                                                                                                                                                                                                                                                                                                                                                                                                                                                                                                                                                                                                                                                                                                                                                                                                                                                                                                                                                                                                                                                                                                                                                                                                                                                                                                                                                                                                                                                                                                                                                                                                                                                                                                                                                                                                                                                                                                                                                                                                                                                                                                                                                                                                                                                                                                                                                                                                                                                                                                                                                                                                                                                                                                                                                                                                                                                                                                                                |
|----------|-----------------------|-------------|------------------------------------------------------------------------------------------------------------------------------------------------------------------------------------------------------------------------------------------------------------------------------------------------------------------------------------------------------------------------------------------------------------------------------------------------------------------------------------------------------------------------------------------------------------------------------------------------------------------------------------------------------------------------------------------------------------------------------------------------------------------------------------------------------------------------------------------------------------------------------------------------------------------------------------------------------------------------------------------------------------------------------------------------------------------------------------------------------------------------------------------------------------------------------------------------------------------------------------------------------------------------------------------------------------------------------------------------------------------------------------------------------------------------------------------------------------------------------------------------------------------------------------------------------------------------------------------------------------------------------------------------------------------------------------------------------------------------------------------------------------------------------------------------------------------------------------------------------------------------------------------------------------------------------------------------------------------------------------------------------------------------------------------------------------------------------------------------------------------------------------------------------------------------------------------------------------------------------------------------------------------------------------------------------------------------------------------------------------------------------------------------------------------------------------------------------------------------------------------------------------------------------------------------------------------------------------------------------------------------------------------------------------------------------------------------------------------------------------------------------------------------------------------------------------------------------------------------------------------------------------------------------------------------------------------------------------------------------------------------------------------------------------------------------------------------------------------------------------------------------------------------------------------------------------------------------------------------------------------------------------------------------------------------------------------------------------------------------------------------------------------------------------------------------------------------------------------------------------------------------------------------------------------------------------------------------------------------------------------------------------------------------------------------------------------------------------------------------------------------------------------------------------------------------------------------------------------------------------------------------------------------------------------------------------------------------------------------------------------------------------------------------------------------------------------------------------------------------|
| E2F3B    | Hematological Disease | 6.59E-09    | <p>NPM1,mir-130,CTCF,TGFBR1,POLA1,PPWD1,NUP133,SSBP2,POR,PORC1,SMARCB1,ADA,MAP1A,ETS1,SLC2A1,NPAT,RANBP3,MSMO1,TCF3,ABCA7,MASTL,GART,DCLE1A,DVL2,KAT6A,PSMD1,CPOX,FANCA,PRDX1,CPD,PPIA,NOTCH2,PNRC1,PCNXL3,GPC6,ATN1,EXO1,SLC12A6,UBE3C,FKBP3,SCFD1,EP400,VPS16,TUBB4B,PASK,RPS10,IPO7,KAT5,ID3,BAK1,BUB1,KPNB1,MTHFD1L,RPS16,MSH2,SLC29A2,ACTL6A,CDKN2A,EEF1A1,NAV2,MPRIP,LHX2,ZFPM1,HDAC10,SMC1A,RGPD4 (includes others),SMAP2,E2F6,USP8,CEP57,ANXA11,MTMR2,ING2,OSBPL1A,POLE4,POLR1B,HDAC2,WEE1,PGM1,DNA2,POLR2H,H6PD,RAD54L,PTPRM,CDCA2,TXNRD1,DYNC1H1,BCL2L1,KIAA0895L,UBE2I,PBRM1,HPS5,PIAS1,CHSY1,BARD1,PDE4A,ZBTB2,GPHN,ALAS1,E2F3,PDCD10,IQGAP1,LSM2,TARBP1,NFAT5,STUB1,ILKAP,ERBB2,GALNT9,MEF2A,PSMC3IP,NFATC4,SOD1,G3BP1,ALS2,UBE2D1,BIRC5,FANCL,BRD3,TMEM109,BRCA2,ING1,MAP4K4,RPLP0,TUBA1B,MCM6,DDX11,RAN,ZNF436,HBP1,MKI67,RPS11,XRCC1,RAD23A,ARNT,POLB,RASGRF1,RARA,TDP2,CBFB,PRIM2,DNMT1,C19orf57,RND2,PYCR1,PABPC1,TTCC21A,TFDP1,ZC3HAV1,YWHAZ,RPL7L1,MDC1,HMGA1,MED12,ANKRD26,CMIP,SH3GL1,MNT,MTMR4,AHI1,CDAN1,FBXO30,ARHGAP35,PRICKLE1,FYN,SNAI2,UVSSA,POLQ,CUL1,CENPN,FKBP1A,CRLF2,PITRM1,EIF4G1,XRCC4,EIF4EBP1,STOM,HK2,RIF1,RINT1,IGF1R,VCL,NCBP3,EED,PSMB9,PMS2,BLMH,SUZ12,POLE,USPL1,PLK1,MDM2,NAP1L1,F3,CDK1,RRM1,SEN1,IMMT,REV1,MUM1,UBN1,KDEL3,GPR180,TRERF1,NCAM1,WDR48,STRN,FBXW7,ZNF609,ZNF91,FAM208A,NAF1,SCARB1,STAG1,ETS2,FASN,PANK4,GOLGA1,STX11,SOX4,HK1,MCM5,COL4A1,PSMF1,POLE2,BIRC6,RAC1,PREX2,DTNB,ATP10A,CDC123,MUT,PREP,PALB2,WHSC1L1,Cdc42,COL6A3,LUC7L2,SH2B3,RHOA,C15orf41,CYLD,JAG1,CDK5RAP2,CDK2,GAS2,BRD2,ZBTB49,GADD45G,TXLNA,LRIG3,KMT2C,ZMIZ1,GTF2B,PRIM1,USP47,SIPA1,IPO5,DHX15,CNTLN,RASSF1,HSPG2,UBR5,TMEM220,MTRR,SNRPB,HAT1,LRRK2,TCF7L1,TSHZ3,MLL1,ALG12,SLC25A38,YARS2,IQCE,SLC25A32,USP34,ADAM9,LANCL2,SCFD2,RAF1,WDR90,MYH9,RDH10,SMC5,KRAS,FAM208B,CCND1,ZC3H12C,EGR2,CENPE,NEK6,ATF4,LSM3,KLF1,HIPK2,MGAT1,TARBP2,UNG,PIGT,TP53,TYMS,FBXO9,ATG5,PHIP,ESPL1,RRM2,MDM1,KLF13,ZNF169,DDR1,RBM4,ATF2,SKP2,PLEKHG2,CCNF,TRPC4AP,BTG2,INVS,TFRC,GAPDH,SRSF4,Meis1,FRG1,XRCC5,PRDX2,HACE1,GCFC2,DEK,ERCC4,PTPN2,AKAP8,EEF1B2,CDK4,KIAA1549,PSEN2,MMS22L,COL16A1,ARF6,CD47,ZC3H8,TMEM260,SNRPD3,KIF2C,NFE2L2,DIS3,RAD21,CYP51A1,CUL7,ZFPM2,UBR4,CAPRIN2,CDKN1A,SHMT1,CEP112,LDHA,CSTF3,TCF7L2,ID4,NUTF2,CASP7,PSEN1,SRSF2,CBWD1,KIF1B,SLC38A10,MSH3,VPS13A,GNB2L1,PARP2,POLR3E,PIEZO1,PINX1,TCEB1,KIF16B,TBC1D2,TGFBR2,MYC,FDFT1,TNRC6C,Gm21596/Hmgb1,EIF3D,PIM1,RCC1,PPP3R1,PXDN,XPO1,Hmga2,CACTIN,BRIP1,PDZRN3,SMC3,SYNE2,DDX23,YWHAE,SH3BP1,PNN,SNX18,DIDO1,SLC12A7,HELLS,BUB1B,KMT2A,ARIH1,NT5C3A,GSE1,TAF1,XRCC6,RECQL4,CDCA7L,MAD1L1,NDC80,CAPN2,SSFA2,ELMO1,RPSA,RBBP4,CDKL3,RUNX1,ARID1A,DENND4B,GTF2I,DCAF4,SLC39A14,RAD50,ETV6,MLH1,RAD51,CCNA2,POLR1C,DIAPH1,FANCD2,TIMP1,STEAP2,LDB1,FOXO3,LRRC8A,LONP1,PRKCA,SLC20A1,ZNF354A,SDC1,NMRAL1,SLC12A2,TUBG1,SMAD6,ZFPL1,RPL23,HSPD1,MTHFD1,FOXM1,GIT1,FAIM,NBN,PRKCI,MAPK14,CHD9,FOXO1,RAD9A,PSMD2,MSH6,ATR,CDC34,KIF18A,CENPF,SOCS1,PLD2,ITSN1,SGK1,CDKN2C,HES1,CHAF1A,VEGFA,CXCL10,FANCB,IPMK,MXD3,THRAP3,EEFSEC,USP10,HEY2,CENPJ,TIMP2,UPF2,STAT6,CDK13,CFL1,NDRG1,PTCH1,RCBTB2,RPA1,ITPR1,PLCL2,FANCC,FAM129B,CTPS1,GEMIN2,IRF1,DOCK1,PCNA,PATZ1,PSMB2,STIP1,H2AFX,E2F1,AHCTF1,ORC5,HPRT1,LRP8,HELB,SLC44A2,CYR61,IFIT2,EPHA2,DDX51,HIST1H1C,ADAM17,ATF7,PDIA3,CTNNA3,NUP214,SETX,FNTB,VCAN,EP300,CHEK1,TRIB1,ID1,RPL35,NCOA2,ADK,RHOA,LAMP1,TOP2A,PDGFRA,CEBPA,BID,STIM1,HEXIM1,RASSF5,LPP,RXR,B, POT1,RPS19,MYCN,mir-199,DCK,ACTB,HERC1,PCDH9,POLD1,STXBP6,KITLG,FADD,ABL2,PDIA6,KIF20B,MUTYH,ADAM10,ADD1,PRMT5,FEN1,NCOR2,IREB2,ZFP36L2,RPL11,CLTB,MELK,TUBB,AURKB,ROCK2,STMN1,FGFR3,SRSF1,RPS20,UBXN4,EZH2,SMPDL3B,NIPBL,RAD51C,BRCA1,PPP6R3,DLC1,CDC25A,NONO,RPL3,ULK4,FGFR1,STK11,TBP,RANBP1,TMOD3,MARS,SIPA1L1,ELF1,GSR,TUBE1,CASP2,ITPRIPL1,GNL3,NSMCE4A,PML,RPL13A,KIF11,PKNOX1,NFIX,GDNF,PICALM,CHPF,ABL1,RBBP8,SLC7A1,TNFAIP3,TAOK1,BCLAF1,PRKAG1,TBC1D10A,ROR2,SP1,PMF1/PMF1-BGLAP,MAML3,ATF6B,RBM15,BLM,ERF,E2F8,S1PR2,HDAC1,SMAD7,let-7,MAPK9,BCL3,USP1,PSIP1,XIAP,FDPS,RIPK1,PBX3,EXOC4,SATB1,ARHGAP31,PDE5A,EIF2AK2,SMARCC1,CAD,HMGR,BCL2L11,SHMT2,LGALS1,WNT5A</p> |

## Supplemental Table 7. General IPA functions for E2F1, E2F3A and E2F3B promoter targets

| ChIP-seq | Category              | B-H p-value | Genes                                                                                                                                                                                                                                                                                                                                                                                                                                                                                                                                                                                                                                                                                                                                                                                                                                                                                                                                                                                                                                                                                                                                                                                                                                                                                                                                                                                                                                                                                                                                                                                                                                                                                                                                                                                                                                                                                                                                                                                                 |
|----------|-----------------------|-------------|-------------------------------------------------------------------------------------------------------------------------------------------------------------------------------------------------------------------------------------------------------------------------------------------------------------------------------------------------------------------------------------------------------------------------------------------------------------------------------------------------------------------------------------------------------------------------------------------------------------------------------------------------------------------------------------------------------------------------------------------------------------------------------------------------------------------------------------------------------------------------------------------------------------------------------------------------------------------------------------------------------------------------------------------------------------------------------------------------------------------------------------------------------------------------------------------------------------------------------------------------------------------------------------------------------------------------------------------------------------------------------------------------------------------------------------------------------------------------------------------------------------------------------------------------------------------------------------------------------------------------------------------------------------------------------------------------------------------------------------------------------------------------------------------------------------------------------------------------------------------------------------------------------------------------------------------------------------------------------------------------------|
| E2F3B    | Immunological Disease | 6.59E-09    | mir-130,NPM1,RAF1,RDH10,HMMR,POLA1,PPWD1,SSBP2,KRAS,CCND1,POR,EGR2,PPRC1,SMARCB1,NEK6,ADA,TARBP2,UNG,FBXO9,ETS1,TP53,TYMS,ESPL1,YAP1,NPAT,RRM2,RANBP3,KLF13,TCF3,DDR1,RBM4,ABCA7,DCLRE1A,GART,SKP2,PLEKHG2,KAT6A,CCNF,BTG2,GAPDH,PSMD1,FRG1,XRCC5,HACE1,PTPN2,AKAP8,PRDX1,CDK4,NOTCH2,ZC3H8,PNRC1,PCNXL3,KIF2C,DIS3,NFE2L2,ATN1,EXO1,CYP51A1,FKBP3,KHDRBS1,TUBB4B,LZTS2,IPO7,ID3,BAK1,KPNB1,MTHFD1L,MSH2,CDKN1A,SLC29A2,CEP112,CSTF3,CASP7,NUTF2,CDKN2A,SRSF2,MSH3,VPS13A,POLR3E,HDAC10,PINX1,TCEB1,MYC,FDFT1,USP8,Gm21596/Hmgb1,ANXA11,RCC1,PIM1,PPP3R1,PXDN,XPO1,Hmga2,PDZRN3,ING2,POLE4,YWHAE,HDAC2,DNA2,H6PD,RAD54L,BUB1B,CDCA2,KMT2A,TXNRD1,BCL2L1,TAF1,XRCC6,RECQL4,CDCA7L,HSP90AA1,NDC80,MAD1L1,ELMO1,RUNX1,ARID1A,GTF2I,ALAS1,IQGAP1,RAD50,LSM2,ETV6,MLH1,RAD51,POLR1C,CCNA2,DIAPH1,NFAT5,TIMP1,STUB1,LDB1,FOXO3,ERBB2,LRRC8A,LONP1,PRKCA,SDC1,TUBG1,MEF2A,RPL23,G3BP1,GIT1,BIRC5,FAIM,NBN,TMEM109,PRKCI,FOXO1,RAD9A,PSMD2,MSH6,BRCA2,CDC34,ING1,MAP4K4,SOCS1,SGK1,RAN,CDKN2C,MKI67,POLB,CHAF1A,CXCL10,VEGFA,RASGRF1,MXD3,RARA,USP10,PRIM2,DNMT1,TIMP2,RND2,PABPC1,PYCRL,STAT6,TFDP1,YWHAZ,MDC1,RPA1,HMGA1,MED12,IRF1,GEMIN2,CMIP,MNT,PCNA,PATZ1,PSMB2,H2AFX,STIP1,E2F1,ORC5,HPRT1,HELB,SLC44A2,IFIT2,CYR61,EPHA2,DDX51,FYN,HIST1H1C,CUL1,NUP214,FKBP1A,CRLF2,XRCC4,EIF4EBP1,EP300,CHEK1,ID1,RPL35,RINT1,RHOU,CEBPA,PDGFRA,LAMP1,TOP2A,BID,STIM1,RASSF5,RXRB,POT1,EED,PSMB9,PMS2,SUZ12,DCK,POLE,MDM2,SLIT2,NAP1L1,F3,POLD1,STXBP6,CDK1,RRM1,FADD,PDIA6,MUM1,MUTYH,PRMT5,FEN1,NCOR2,NCAM1,STRN,FBXW7,TUBB,AURKB,ZNF91,FGFR3,STMN1,ROCK2,SCARB1,ETS2,EZH2,FASN,NIPBL,PPP6R3,BRCA1,DLC1,STX11,MCM5,COL4A1,NONO,POLE2,STK11,FGFR1,RAC1,BIRC6,RANBP1,CDC123,GSR,Cdc42,TUBE1,RHOA,CASP2,SH2B3,CYLD,PML,KIF11,CDK2,BRD2,GADD45G,TLXNA,RBBP8,ABL1,TNFAIP3,LRIG3,TAOK1,BCLAF1,KMT2C,ZMIZ1,ROR2,GTf2B,PRIM1,PMF1/PMF1-BGLAP,BLM,IPO5,RASSF1,UBR5,S1PR2,SNRPB,HAT1,HDAC1,let-7,SMAD7,MAPK9,BCL3,TCF7L1,PSIP1,XIAP,FDPS,RIPK1,EXOC4,SATB1,PDE5A,CAD,SMARCC1,HMGCR,ADAM9,SHMT2,BCL2L11,LANCL2,WNT5A,LGALS1 |

## Supplemental Table 7. General IPA functions for E2F1, E2F3A and E2F3B promoter targets

| ChIP-seq | Category                     | B-H p-value | Genes                                                                                                                                                                                                                                                                                                                                                                                                                                                                                                                                                                                                                                                                                                                                                                                                                                                                                                                                                                                                                                                                                                                                                                                                                                                                                                                                                                                                                                                                                                                                                                                                                                                                                                                                                                                                                                                                                                                                                                                                                                                                                                                                                                                                                                                                                                                                                                                                                                                                                                                                                                                                                                                                                                                                                                                                                                                                                               |
|----------|------------------------------|-------------|-----------------------------------------------------------------------------------------------------------------------------------------------------------------------------------------------------------------------------------------------------------------------------------------------------------------------------------------------------------------------------------------------------------------------------------------------------------------------------------------------------------------------------------------------------------------------------------------------------------------------------------------------------------------------------------------------------------------------------------------------------------------------------------------------------------------------------------------------------------------------------------------------------------------------------------------------------------------------------------------------------------------------------------------------------------------------------------------------------------------------------------------------------------------------------------------------------------------------------------------------------------------------------------------------------------------------------------------------------------------------------------------------------------------------------------------------------------------------------------------------------------------------------------------------------------------------------------------------------------------------------------------------------------------------------------------------------------------------------------------------------------------------------------------------------------------------------------------------------------------------------------------------------------------------------------------------------------------------------------------------------------------------------------------------------------------------------------------------------------------------------------------------------------------------------------------------------------------------------------------------------------------------------------------------------------------------------------------------------------------------------------------------------------------------------------------------------------------------------------------------------------------------------------------------------------------------------------------------------------------------------------------------------------------------------------------------------------------------------------------------------------------------------------------------------------------------------------------------------------------------------------------------------|
| E2F3B    | Renal and Urological Disease | 3.48E-08    | CTCF,SLC6A9,SMARCD2,EIF4A2,SECISBP2,TRIM32,POR,SMARCB1,TCERG1,RANBP3,ZBTB5,TCF3,ABCA7,SP4,DCLRE1A,GART,DAXX,PDSS1,PSMD1,DIT3,BAG6,CEBPZ,NOTCH2,PELO,ATN1,UBE3C,HIST2H3D,EP400,TUBB4B,PASK,KAT5,CSF1,CDKN2A,KIF23,NAV2,PCDH18,TROAP,SMAD3,INTS1,SMC1A, RGD4 (includes others),E2F6,LHFPL2,POLE4,IFT74,KIAA0907,BCL2L1,AEBP2,CEP76,MCCC2,PBRM1,PIAS1,ALAS1,GPHN,SPSB3,E2F3,NFAT5,STUB1,ERBB2,SMARCD1,SD1,BIRC5,KLF5,BRCA2,ZDHHC3,TSC22D1,SLC25A5,DDX11,CTGF,MKI67,RBL1,CD2AP,ATP1A1,CBFB,PABPC1,PIK3C2B,CENPB,DPY19L1,COQ10A,CCDC91,SH3GL1,ARHGAP5,SPOP,RNF168,RERE,CREM,DNAJC14,ARHGAP35,SGOL1,TMEM158,BRPF3,RREB1,ARHGEF7,CUL1,POLQ,CENPN,FKBP1A,BOK,HMGB2,PITRM1,ANKRD12,ATP6AP1,ATAD5,TYW1,HK2,RNPS1,TICRR,DIS3L2,IGF1R,VCL,ZCCHC6,PSMB9,POLE,PLK1,MDM2,SLIT2,SCMH1,SRXN1,F3,CDK1,RRM1,H2AFY,SBF1,CAP1,GXYLT1,UNC5B,IPPK,FBXW7,ZNF91,METAP2,YWHAQ,GSPT1,ETS2,STX11,HK1,ACSL3,TRIOBP,TRAF3IP1,POLE2,RAC1,PREX2,ALAD,NDUFAF2,GPAA1,PREP,NASP,Cdc42,COL6A3,IFT81,RHOA,SCRIB,KBTBD8,CDK5RAP2,CDK2,KDM3A,ZFAT,AGAP1,SRRT,LRIG3,KMT2C,UHRF2,GMNN,DSCR3,YLPM1,EMILIN1,RASSF1,HSPG2,LXN,UBR5,POC1B,PHLDA3,GLS,LRRK2,GUK1,TSHZ3,PIAS3,SLC25A38,ACAT1,TFB2M,USP34,CENPH,RAF1,RNF8,PCBP1,KRAS,FAM208B,CCND1,ADRB3,PKN2,SNRNP48,MPHOSPH8,CENPE,ZNF687,HIPK2,MSTO1,PIGT,ALDH7A1,TP53,TYMS,GNE,ATG5,PAPD4,YAP1,RRM2,ZC3H18,SYNJ2,OGFOD2,BTG2,TFRC,GAPDH,ZDHHC1,FRG1,PRDX2,TRIM33,AKAP8,FBXO7,ESYT1,EEF1B2,CDK4,CTDSPL,KIAA1549,PSEN2,TMEM209,CGNL1,TRIM27,ATP5J2,NFE2L2,RAD21,CYP51A1,SLC35A5,TUBGCP6,POLG,LZTS2,SLC29A1,PLA2G4A,ATP13A3,CDKN1A,MBD3,PSAP,LDHA,CASP7,KLHL17,PSEN1,DLGAP5,SRSF2,RPL22,ILF3,CCDC15,KIF1B,ATP2B1,SLC41A3,VPS13A,KLF6,TSMF,TLN1,TCEB1,TGFBR2,MYC,FDFT1,PPP3R1,AP5M1,CACTIN,DPM3,SMC3,BCAS2,CCDC18,SYNE2,MAST4,ZNF706,DIDO1,HELLS,RBFOX2,BUB1B,KMT2A,ARIH1,TAF1,TRIM39,UGP2,DUSP1,NDUFA6,SEC31B,HSP90AA1,RUNX1,ARID1A,LETMD1,TBC1D8B,RPS6KA3,DNAJC10,ATF6,RAD51,POLR1C,RPL14,LYST,AHNAK,FANCD2,WDFY3,TIMP1,FOXO3,GMFB,PRKCA,TUBG1,NMT2,ZHX3,SLK,PMP22,LTBP3,MAPK14,FOXO1,CHD9,PSMD2,ZNF622,SMG7,ATR,CDC34,CENPF,GTF3C2,TOR1A,CDKN2C,GSTZ1,VEGFA,THRAP3,BAG1,SEC24A,MAP1S,IRS2,TIMP2,KMT2B,OTUD4,MITF,PTCH1,ITPR1,IRF1,POM121/POM121C,PCNA,BSG,BHLHE40,IRS1,ZNF672,E2F1,TMX1,GNB2,MSH5,MAPK7,HELB,CYR61,PHLPP1,HIST1H1C,ADAM17,CTC1,ATF7,PKD2,XPOT,NUP214,SGMS1,EP300,XYLB,TRIB1,PDGFRA,CEBPA,TOP2A,DAP3,PRKCE,BID,MAP1LC3A,RASSF5,KHSRP,PLAT,MYCN,mir-199,C10orf2,TBX3,ACTB,ATXN2L,SIN3A,FADD,SLC30A9,KIF15,CHMP6,NUP153,MCM2,SREBF2,KIF20B,NOP2,NCOR2,MAFB,ZFP36L2,SMARCD1,NAGK,PALLD,MAPK1,MELK,TUBB,AURKB,LATS2,FGFR3,PTK2,STMN1,ASXL2,EZH2,ERLIN2,ITGAV,NEO1,SHAH2,NIPBL,HTRA2,PUF60,RAD51C,BRCA1,DLC1,AIM1,SSNA1,NONO,NUP155,LMLN,STK11,FGFR1,TBP,SSRP1,MED14,SIPA1L1,WWP2,PKD1,TUBE1,CASP2,RRP7A,VDAC1,KIF11,PKM,ABL1,BCLAF1,ACOT7,C12orf45,TCF12,EPHB6,NTNG1,GEMIN4,RRN3,BLM,MAP2K7,C2CD3,SMAD7,NFKBIZ,PSIP1,XIAP,FDPS,PPP6R1,RIPK1,LPAR1,SMARCC1,EIF2AK2,VGF,HMGCRCR,BCL2L11 |
| E2F3B    | Tumor Morphology             | 4.06E-08    | SOCS1,NPM1,RAF1,TGFBR1,F2R,PRKAB1,SGK1,HMMR,TLE1,KRAS,MKI67,HES1,CCND1,VEGFA,FHL2,BAG1,RARA,USP10,TXN,HIPK2,AHCY,TIMP2,TP53,ETS1,NDRG1,MITF,PTCH1,HBEGF,TFAP4,ITPR1,IRF1,SKP2,ATF2,DAXX,DVL2,BSG,IRS1,BTG2,CREM,E2F1,EYA3,MAPK7,CYR61,EPHA2,PTPRA,XRCC5,PHLPP1,PIM3,SNAI2,DDIT3,PTPN13,PLAGL1,CUL1,PTN,CDK4,BOK,TAX1BP3,VCAN,CDH11,EIF4EBP1,CHEK1,EP300,KISS1R,ID1,TRIB1,YY1,CD47,DGCR8,PDGFRA,IGF1R,PRKCE,BID,NFE2L2,PLAT,AIFM1,ATP7B,MYCN,CDC6,LZTS2,GREM1,PLK1,MDM2,ACLY,ID3,F3,CDK1,FADD,KITLG,MAD2L1,CCNE1,NR4A2,MCM2,CSF1,SPRY2,CDKN1A,ADAM10,EIF2B1,HOXB9,NCOR2,LDHA,TCF7L2,CDKN2A,EEF1A1,PHLDA1,SOCS3,TFG,MAPK1,SMAD3,GNB2L1,DICER1,FGFR3,STMN1,SOX2,MYC,TGFBR2,SRSF1,PIM1,TTBK2,EZH2,FASN,ITGAV,SUGT1,MYBL2,BRCA1,HDAC2,FGFR1,RAC1,TUSC3,BUB1B,KMT2A,SLC3A2,PREP,SRSF3,BCL2L1,CBX1,DUSP1,CASP2,RHOA,NUAK1,ACTN4,PML,JAG1,CDK2,RUNX1,BRD2,LITAF,ZBTB7A,GDNF,TXLNA,KLF10,PDE4A,ABL1,NGF,RAD50,MIER1,HDGF,NELFE,RAD51,SIX1,SP1,TIMP1,FOXO3,ERBB2,PRKCA,NDUFAF3,RASSF1,HSPG2,GLS,HDAC1,MAPK9,LRRK2,USP1,SOD1,FOXM1,BIRC5,XIAP,MLLT1,RCAN1,ENO1,PRKCI,MAPK14,LPAR1,FOXO1,ZNF622,TSC22D1,EIF2AK2,HMGCRCR,EFEMP2,BCL2L11,WNT5A,LGALS1                                                                                                                                                                                                                                                                                                                                                                                                                                                                                                                                                                                                                                                                                                                                                                                                                                                                                                                                                                                                                                                                                                                                                                                                                                                                                                                                                                                                                                                                                                                                                                                                                                                                                                                                                             |

## Supplemental Table 7. General IPA functions for E2F1, E2F3A and E2F3B promoter targets

| ChIP-seq | Category                                       | B-H p-value | Genes                                                                                                                                                                                                                                                                                                                                                                                                                                                                                                                                                                                                                                                                                                                                                                                                                                                                                                                                                                                                                                                                                                                                                                                                                                                                                                                                                                                                                                                                                                                                                                                                                                                                                                                                                                                                                                                                                                                                                                                                                                                                                                                                                                                                                                                                                                                                                                                                  |
|----------|------------------------------------------------|-------------|--------------------------------------------------------------------------------------------------------------------------------------------------------------------------------------------------------------------------------------------------------------------------------------------------------------------------------------------------------------------------------------------------------------------------------------------------------------------------------------------------------------------------------------------------------------------------------------------------------------------------------------------------------------------------------------------------------------------------------------------------------------------------------------------------------------------------------------------------------------------------------------------------------------------------------------------------------------------------------------------------------------------------------------------------------------------------------------------------------------------------------------------------------------------------------------------------------------------------------------------------------------------------------------------------------------------------------------------------------------------------------------------------------------------------------------------------------------------------------------------------------------------------------------------------------------------------------------------------------------------------------------------------------------------------------------------------------------------------------------------------------------------------------------------------------------------------------------------------------------------------------------------------------------------------------------------------------------------------------------------------------------------------------------------------------------------------------------------------------------------------------------------------------------------------------------------------------------------------------------------------------------------------------------------------------------------------------------------------------------------------------------------------------|
| E2F3B    | Cardiovascular System Development and Function | 6.89E-08    | mir-130,RAF1,CTCF,MYH9,TGFBR1,PRKAB1,PRKAB2,RDH10,Ap2b1,TAB2,TMEM38A,KRAS,ATP2A2,CCND1,POR,FHL2,GATAD2A,FBLN1,ADA,ADORA2B,KLF1,HIPK2,MGAT1,TP53,ETS1,CCNE2,PAM,YAP1,PIGF,CRKL,TMEM67,DDR1,SKP2,ATF2,ATE1,CNTRL,DVL2,CCNF,KAT6A,ALCAM,KIAA1429,TFRC,Meis1,ECT2,PRDX2,FLNB,PIM3,NRG2,DDIT3,SNX17,PRDX1,GNA11,PDS5B,CDK4,PPIA,PSEN2,NOTCH2,TIPARP,DAB2,NFE2L2,CYP51A1,EP400,GAS1,CUL7,GREM1,ID3,IGF2R,BAK1,PLA2G4A,CCNE1,ZFPM2,CSF1,CDKN1A,PSAP,SEMA3C,LDHA,MAP3K3,SGCD,TFB1M,TCF7L2,CASP7,PSEN1,CDKN2A,SOCS3,SEPT9,LHX2,RASA3,SMAD3,KLF6,ZFPM1,RPGRIP1L,IFT140,MYC,TGFBR2,LEMD3,USP8,Gm21596/Hmgb1,MAP2K2,PIM1,PPP3R1,MATR3,GCLM,PPP1R15B,TAB1,PGK1,UBE4B,HDAC2,YWHAE,IFT74,DIDO1,RDX,MAPKAPK5,RAD54L,POFUT1,PTPRM,KMT2A,PFKM,BCL2L1,TFAM,ATP5B,DUSP1,TXN2,FZD5,CAPN2,ACTN4,RPSA,RHBDF1,FOXP4,RUNX1,PBRM1,TFEB,RND1,ARID1A,GTF2I,SMAD5,CLIC4,PDCD10,ETV6,CCNA2,NFAT5,TIMP1,BMPR1A,LDB1,ZNF24,FOXO3,ERBB2,RAD23B,PRDM6,LASP1,WDR1,PRKCA,VAV2,CAPZB,ADAM15,AP1S2,SMAD6,MEF2A,HSPD1,SOD1,SNX27,NFATC4,MTHFD1,FOXM1,BIRC5,MORF4L1,RCAN1,PSKH1,MAPK14,FOXO1,EHD4,TFCP2,E2F7,KLF5,BRPF1,WNK1,EFEMP2,NR6A1,CTGF,F2R,UBR2,CDKN2C,HES1,RICTOR,ARNT,CXCL10,VEGFA,CD2AP,THRAP3,RARA,ZBTB14,MAP1S,TDP2,CBFB,HEY2,HIPK1,FRS2,TIMP2,PIK3C2B,NDRG1,CSRP2,FOXH1,HIRA,PTCH1,YWHAZ,PLEC,HBEGF,HMGA1,ME D12,DOCK1,PATZ1,BSG,GAB1,YARS,AHI1,H2AFX,IRS1,STIP1,E2F1,HSPB11,LRP8,MAPK7,CYR61,PRICKLE1,EPHA2,B9D1,HIST1H1C,VASH2,ADAM17,SNAI2,ATF7,LEMD2,PKD2,PTN,CTNNA3,FKBP1A,HMGB2,FZD1,VCAN,SRSF10,EP300,WTAP,COL5A1,ID1,EFNB2,YY1,PRRX1,DGCR8,IGF1R,PDGFRA,PRKCE,S TIM1,MCPH1,VCL,HEXIM1,RXR, NCKIPSD, PLOD3, PLAT, LUZP1, MYCN, mir-199, TBX3, AGO2, DLX1, MDM2, SLIT2, F3, KITLG, FADD, ABL2, LIMS1, SPRY2, ADAM10, ADD1, RBPJ, GPR180, NCOR2, IREB2, DYRK1A, NAB2, CAV2, MAPK1, DIAPH3, Wasl, UNC5B, FBXW7, DICER1, LATS2, METAP2, FGFR3, ROCK2, PTK2, CAMK2D, SCARB1, RORA, ASXL2, ITGAV, Map3k7, NIPBL, SIAH2, HTRA2, BRCA1, DLC1, SOX4, STIL, COL4A1, DTNBP1, STK11, FGFR1, BIRC6, RAC1, LMNA, RHOJ, SMARCD3, Cdc42, PKD1, RHOA, INTU, CYLD, MTDH, PML, JAG1, Paxip1, CDK2, TEAD4, SPRE D1, PKNOX1, C5orf42, GDNF, PDGFA, PKM, MARK2, ABL1, TNFAIP3, SLC7A1, ING4, NGF, BCLAF1, BCAR1, PRKAG1, ZMIZ1, TNFRSF12A, ROR2, GLI3, MAML3, RBM15, NCL, MAPKAPK2, BLM, E2F8, RASSF1, NACA, HSPG2, MAP2K7, S1PR2, TRA2B, Nedd4, C2CD3, MTMR14, let-7, SMAD7, MAPK9, TCF7L1, EDF1, XIAP, B4GALT1, PLEKHG5, ADAM9, LGALS1, WNT5A |
| E2F3B    | Organ Development                              | 6.89E-08    | TGFBR1,RDH10,Ap2b1,TAB2,KRAS,SLC35C1,ATP2A2,CCND1,POR,FBLN1,ADA,TP53,YAP1,CRKL,MAN1A2,TMEM67,ATF2,ATE1,CNTRL,DVL2,KAT6A,CELS R3,SNX17,BAG6,GNA11,CDK4,PSEN2,NOTCH2,NFE2L2,CYP51A1,GAS1,GREM1,ID3,IGF2R,ZFPM2,CDKN1A,SEMA3C,CASP7,PSEN1,SMAD3,ZFPM1,RPGR IP1L,ATXN1L,CEBPG,IFT140,TGFBR2,MYC,SOX2,USP8,Gm21596/Hmgb1,MAP2K2,PPP3R1,MAPK3,MATR3,TAB1,TOP3B,HDAC2,IFT74,POFUT1,TFAM,DUS P1,TXN2,LMNB2,SUV420H1,FOXP4,PBRM1,ARID1A,SMAD5,CCNA2,NFAT5,BMPR1A,LDB1,FOXO3,ERBB2,PRKCA,WDR1,SMAD6,NFATC4,FOXM1,MTHFD1, GIT1,MORF4L1,MAPK14,PSKH1,FOXO1,CTGF,UBR2,HES1,POLB,CXCL10,VEGFA,RARA,ZBTB14,HEY2,FRS2,STAT6,FOXH1,HIRA,PTCH1,PLEC,HBEGF,ME D12,GAB1,AHI1,STIP1,HSPB11,MAPK7,CYR61,PRICKLE1,ADAM17,ATF7,PKD2,LEMD2,FKBP1A,FZD1,VCAN,CDH11,EP300,COL5A1,ID1,NCOA2,CREB1,PD GFRA,CEBPA,BID,HEXIM1,VCL,RXR,NCKIPSD,PLOD3,LUZP1,MYCN, mir-199, TBX3, RQCD1, MDM2, KITLG, FADD, LIMS1, SPRY2, FEN1, RBPJ, NCOR2, DYRK1A, MAPK1, CAV2, DIAPH3, FBXW7, DICER1, LMNB1, PTK2, FGFR3, CAMK2D, AS XL2, Map3k7, NIPBL, BRCA1, DLC1, SOX4, STIL, DTNBP1, FGFR1, SMARCD3, Cdc42, ARRB2, PKD1, TIMELESS, RHOA, LOXL1, PTPRS, INTU, CYLD, JAG1, Paxip1, CD K2, RPL13A, TMTC3, C5orf42, PDGFA, ABL1, BCLAF1, BCAR1, ZMIZ1, FUT8, ROR2, Cux1, GLI3, SP1, MAML3, RBM15, NACA, RASSF1, HSPG2, MAP2K7, S1PR2, HAT1, C2CD3, SMAD7, MAPK9, LRRK2, TSHZ3, B4GALT1, NFIB, WNT5A                                                                                                                                                                                                                                                                                                                                                                                                                                                                                                                                                                                                                                                                                                                                                                                                                                                                                                                                                                                                                                                  |
| E2F3B    | Hereditary Disorder                            | 7.22E-08    | DDHD2,TGFBR1,MYH9,GARS,CCND1,VEGFA,FANCB,EGR2,TARDBP,SMARCB1,DNMT1,TP53,CCNE2,CFL1,NDRG1,TFDP1,CSRP2,MITF,PTCH1,TBK1,SPG 7,FANCC,AP5Z1,PCNA,YARS,E2F1,TMEM43,FANCA,INF2,ERCC4,GALC,FBXO7,DDIT3,CDK4,FKBP1A,SETX,EIF4G1,TAX1BP3,EIF4EBP1,COL5A1,DIS3L2,S OS1,DAB2,AIFM1,SLC12A6,SDHA,PMS2,C10orf2,POLG,HNRNPDL,ACLY,CCNE1,IGHMBP2,NR4A2,MSH2,SBF1,MUTYH,CAP1,PSAP,PSEN1,CDKN2A,PALLD ,CAV2,TFG,SEPT9,KIF1B,DIAPH3,PARP2,TDP1,TGFBR2,ERLIN2,MTMR2,HTRA2,TFDP2,BRCA1,RAD51C,BRIP1,SEC63,HK1,SYNE2,COL4A1,SBF2,STK11,M ARS2,LMNA,TXNRD1,DYNC1H1,BCL2L1,PALB2,FLOT2,COL6A3,LOXL1,CYLD,JAG1,KDELRL2,RUNX1,LITAF,SPRED1,GDNF,CCNC,BARD1,RBBP8,NGF,PDC D10,RAD50,MLH1,RAD51,AHNAK,FANCD2,BMPR1A,BLM,EMILIN1,RASSF1,PRKCA,BICD2,SPG21,MTMR14,LRRK2,HSPD1,SOD1,ALS2,ATL3,FANCL,NBN,L TBP3,PMP22,CNN3,PLEKHG5,MSH6,BRCA2,DCTN1,ATR,WNK1                                                                                                                                                                                                                                                                                                                                                                                                                                                                                                                                                                                                                                                                                                                                                                                                                                                                                                                                                                                                                                                                                                                                                                                                                                                                                                                                                                                                                                                                                                                                                                           |

## Supplemental Table 7. General IPA functions for E2F1, E2F3A and E2F3B promoter targets

| ChIP-seq | Category                                             | B-H p-value | Genes                                                                                                                                                                                                                                                                                                                                                                                                                                                                                                                                                                                                                                                                                                                                                                                                                                                                                                                                                                                                         |
|----------|------------------------------------------------------|-------------|---------------------------------------------------------------------------------------------------------------------------------------------------------------------------------------------------------------------------------------------------------------------------------------------------------------------------------------------------------------------------------------------------------------------------------------------------------------------------------------------------------------------------------------------------------------------------------------------------------------------------------------------------------------------------------------------------------------------------------------------------------------------------------------------------------------------------------------------------------------------------------------------------------------------------------------------------------------------------------------------------------------|
| E2F3B    | Cellular Response to Therapeutics                    | 1.79E-07    | CDKN2A,MCM8,PARP2,KRAS,POLB,MXD3,CRADD,MTF1,MYBL2,GCLM,HIPK2,BRCA1,HIPK1,UNG,TP53,STAT6,RAD54L,HELLS,FANCC,TERF2,PCNA,XRC6,SLC25A10,SUV420H1,Paxip1,XRCC5,PRDX2,HIST1H1C,PRDX1,HMGN1,RCHY1,XRCC4,RAD9B,RAD50,STIM2,RAD51,HINT1,HUS1,MCPH1,STIM1,ERBB2,MCM9,NFE2L2,PIPF,XIAP,BAK1,NBN,MSH2,CDKN1A,BRCA2,FEN1,ING1,EIF2AK2,POLH                                                                                                                                                                                                                                                                                                                                                                                                                                                                                                                                                                                                                                                                                 |
| E2F3B    | Nervous System Development and Function              | 2.85E-07    | RAF1,PLD2,MYH9,SGK1,CDKN2C,KRAS,ELAVL4,RBL1,RAPH1,CCND1,VEGFA,RUSC1,KLF7,RASGRF1,MXD3,BAG1,BAIAP2,TARDBP,RAB17,PLXNB2,TXN,FRS2,RND2,GET4,TP53,Irx5,CFL1,PTCH1,CSNK1D,YWHAZ,GRK5,GEMIN2,DDR1,ARHGAP5,DOCK1,DVL2,GAB1,E2F1,PRKACA,RAB11A,MAPK7,ELMO2,EPHA2,PTPRA,ADAM17,MAP2,PLXNA3,PDIA3,PLAGL1,ARHGFE7,PTN,CDK4,VCAN,EIF4EBP1,EP300,GPR3,EFNB2,ID1,CD47,ARF6,TCOF1,CREB1,IGF1R,DAZ1,STIM1,VCL,FKBP5,PLAT,MYCN,SLIT2,MAFK,FRK,ID3,CDK1,KITLG,NDE1,CSF1,SPRY2,CDKN1A,ADAM10,PSAP,PAFAH1B1,ID4,DYRK1A,NCAM1,MAOA,PSEN1,FZR1,KIF23,SOCS3,PALLD,NCDN,MPRIIP,MAPK1,SEPT9,VTI1A,POLR3E,RPGRIP1L,TGFBR2,ROCK2,SOX2,FGFR3,Gm21596/Hmgb1,MAPK3,ARHGAP25,MYO10,TBC1D24,UBE4B,FGFR1,RAC1,SNX3,PTPRM,SMARCD3,Cdc42,CORO1B,RHOA,ETV4,PTPRS,DIXDC1,EXTL3,HDGFRP3,JAG1,CDK2,EEA1,RND1,NFIX,GDNF,DPYSL3,MARK2,ABL1,PDE4A,CSR1,GPHN,IQGAP1,NGF,E2F3,TNFRSF12A,SET,SIX1,GLI3,STUB1,BMPR1A,MANF,USP47,MAML3,ERBB2,PRKCA,S1PR2,Nedd4,SLC12A2,LRRK2,MAPK9,SOD1,NFATC4,ALS2,NBN,FAIM,EXOC4,LPAR1,FOXO1,SLC25A5,VGF,HMGR,WNT5A,LGALS1 |
| E2F3B    | Renal and Urological System Development and Function | 3.56E-07    | CDKN2A,DLGAP5,SOCS3,CTCF,CAV2,UNC5B,KLF6,SFPQ,KRAS,FGFR3,HSPA4,SUMO1,CSTF2,DLC1,ULK2,TP53,ATG5,TFDP1,YAP1,PNN,PTCH1,LMNA,ZBTB5,PTP4A1,KMT2A,SKP2,PKD1,RHOA,E2F1,CHKA,HSP90AA1,VDAC1,TEAD4,TLL4,PIAS1,MED28,Tpm2,EIF4EBP1,NOP58,STEAP2,FOXO3,CEBPA,ERBB2,NCL,PEMT,RASSF1,OXTR,STT3B,POLG,PLK1,HSPD1,BIRC5,AFF1,PMP22,SPDYA,MAPK14,CSF1,KLF5,CDKN1A,WISP1                                                                                                                                                                                                                                                                                                                                                                                                                                                                                                                                                                                                                                                       |
| E2F3B    | Molecular Transport                                  | 4.70E-07    | CENPF,CDKN2A,NPM1,ASPSCR1,MYH9,EPH2,YWHAH,AHCYL1,ARF1,KIF1B,SNX8,RAB2A,RAN,NME2,NUP58,KRAS,KPNA1,TOMM70A,IFT27,CEP57,PEX16,EGR2,KIF13A,SUMO1,XPO1,TP53,PHIP,NUP155,CFL1,TNPO1,CLTC,RAB10,CSNK1D,RAB8A,SNX3,ADAR,WWP2,HSPA8,TNPO2,ERP29,PKD1,RHOA,COX18,RAB11A,AGAP3,PML,ECT2,PRICKLE1,XPO6,KDELR2,PICALM,PDIA3,MCM3AP,FAM53A,NUP214,PSEN2,DNAJA1,TGFBRAP1,IPO9,ARF6,NUP54,Pgap2,GLI3,HLA-DMA,STEAP2,RANGAP1,IPO5,RPAIN,HSPG2,SCFD1,VPS18,VPS16,IFT46,CHP1,TOB1,BCL3,IPO7,SOD1,SNX27,NXT1,IGF2R,DNM1,KPNB1,MAPK14,EXOC4,NDE1,RAB12,CAP1,POLA2,DCTN1,ING1,SCAMP3,Arf2,NUTF2,AP1G1,PSEN1                                                                                                                                                                                                                                                                                                                                                                                                                         |
| E2F3B    | Protein Trafficking                                  | 4.70E-07    | CENPF,CDKN2A,NPM1,ASPSCR1,MYH9,EPH2,YWHAH,AHCYL1,ARF1,KIF1B,SNX8,RAB2A,RAN,NME2,NUP58,KRAS,KPNA1,TOMM70A,IFT27,CEP57,PEX16,EGR2,KIF13A,SUMO1,XPO1,TP53,PHIP,NUP155,CFL1,TNPO1,CLTC,RAB10,CSNK1D,RAB8A,SNX3,ADAR,WWP2,HSPA8,TNPO2,ERP29,PKD1,RHOA,COX18,RAB11A,AGAP3,PML,ECT2,PRICKLE1,XPO6,KDELR2,PICALM,PDIA3,MCM3AP,FAM53A,NUP214,PSEN2,DNAJA1,TGFBRAP1,IPO9,ARF6,NUP54,Pgap2,GLI3,HLA-DMA,STEAP2,RANGAP1,IPO5,RPAIN,HSPG2,SCFD1,VPS18,VPS16,IFT46,CHP1,TOB1,BCL3,IPO7,SOD1,SNX27,NXT1,IGF2R,DNM1,KPNB1,MAPK14,EXOC4,NDE1,RAB12,CAP1,POLA2,DCTN1,ING1,SCAMP3,Arf2,NUTF2,AP1G1,PSEN1                                                                                                                                                                                                                                                                                                                                                                                                                         |
| E2F3B    | Hematological System Development and Function        | 3.40E-06    | NPM1,RAF1,TGFBR1,CTCF,KRAS,CCND1,VEGFA,RARA,BAIAP2,ADA,ATF4,CBFB,KLF1,TIMP2,TP53,PAPD4,EEF2,FANCC,HMGA1,KLF13,TCF3,ADAR,IRF1,DOCK1,PATZ1,BSG,KAT6A,E2F1,BTG2,TFRC,SRSF4,Meis1,SAC3D1,PRDX2,FYN,DEK,PIM3,PTPN2,PRDX1,ARHGFE7,CDK4,CEBPD,PSEN2,HMGB2,XRCC4,MAFG,ID1,CD47,YY1,HUS1,PDGFRA,CEBPA,TOP2A,PRKCE,NFE2L2,RPS19,DCK,MDM2,MAFK,IGF2R,SIN3A,KITLG,FADD,SEN1,AGPAT5,ZFPM2,MSH2,CSF1,CDKN1A,ADD1,GABPA,FEN1,MAFB,IREB2,ZFP36L2,PSEN1,FZR1,CDKN2A,SOCS3,PALLD,LHX2,MAPK1,SMAD3,DIAPH3,Wasf,KLF6,FBXW7,KXD1,ZFPM1,ABCC10,TGFBR2,MYC,TNRC6C,HIST1H4A,HIST1H4C,SCARB1,PIM1,MAPK3,HIST1H4I,MYBL2,HIST1H4J,PPP1R15B,STX11,ESCO2,SOX4,FSTL3,STK11,DIDO1,BIRC6,RAC1,TMOD3,POFUT1,KCNAB2,KMT2A,PFKM,BCL2L1,Cdc42,SH2B3,MAD1L1,CYLD,TMPO,PML,JAG1,CDK2,UBE2I,RUNX1,ZFAT,PICALM,HIST2H4B,ABL1,SLC7A1,SMAD5,PRKAG1,ZBTB24,ETV6,TNFRSF12A,SP1,GLI3,TIMP1,LDB1,FOXO3,SIP1,RBM15,BLM,LRRK8A,LONP1,PRKCA,SLC20A1,SOD1,DOCK7,RRS1,SLC7A6OS,BIRC5,PRMT1,C19orf68,MLLT1,MAPK14,B4GALT1,SATB1,EIF2AK2,UBC                       |



## Supplemental Table 7. General IPA functions for E2F1, E2F3A and E2F3B promoter targets

| ChIP-seq | Category                                     | B-H p-value | Genes                                                                                                                                                                                                                                                                                                                                                                                                                                                                                                                                                                                                                                                                                                                                                                                                                                                                                                                                                                                                                                                                                                                                                                                                                     |
|----------|----------------------------------------------|-------------|---------------------------------------------------------------------------------------------------------------------------------------------------------------------------------------------------------------------------------------------------------------------------------------------------------------------------------------------------------------------------------------------------------------------------------------------------------------------------------------------------------------------------------------------------------------------------------------------------------------------------------------------------------------------------------------------------------------------------------------------------------------------------------------------------------------------------------------------------------------------------------------------------------------------------------------------------------------------------------------------------------------------------------------------------------------------------------------------------------------------------------------------------------------------------------------------------------------------------|
| E2F3B    | Reproductive System Development and Function | 4.49E-06    | RAF1,RNF8,TGFBR1,RDH10,Ubb,CCND1,ADA,ATF4,TARBP2,TP53,CCNE2,YAP1,DDR1,SKP2,CCNF,RAD18,FADS2,FANCA,PRDX4,BAG6,USF2,CDK4,CEBP D,KISS1R,NOTCH2,TRIM27,TIPARP,ALMS1,HEXB,ATP7B,CUL7,HSPA2,BAK1,ZFPM2,MSH2,CSF1,PLEKHA1,ID4,CDKN2A,SOCS3,SFMBT1,KLF6,TGFBR2,S MAP2,SOX2,HSPA4,CEP57,Hmga2,JUND,CEP131,MTMR2,CHTF18,GPX4,ING2,FSTL3,HELLS,NDC1,BCL2L1,FZD5,PBRM1,PEBP1,TFEB,SMAD5,MLH1,FAN CD2,TIMP1,LDB1,FOXO3,ERBB2,MCM9,ARL4A,LRRRC8A,RAD23B,SLC12A2,ALKBH5,PSMC3IP,SOD1,FANCL,NBN,MAPK14,EHD4,E2F7,BRCA2,BRPF1,KIF18 A,SOCS1,NR6A1,CTGF,F2R,RTCB,UBR2,CDKN2C,DDX20,KPNA1,ARNT,VEGFA,DYNLL1,RARA,ZFX,IRS2,TTL5,KMT2B,STAT6,HIRA,PTCH1,HMGA1,FANC C,ARHGAP5,PCNA,PATZ1,BSG,GAB1,H2AFX,IRS1,CREM,MSH5,LRP8,FYN,SNAI2,PKD2,PTN,HMGB2,DNAJA1,GPR3,ID1,YY1,NCOA2,USP42,CREB1,CEBP A,IGF1R,PDGFRA,LAMP1,HEXIM1,RXR,OXTR,ADRM1,TBX3,TIAL1,KATNAL1,SLIT2,SCMH1,YBX2,KITLG,NUP153,SBF1,TBPL1,HOXB9,RBPJ,PAFAH1B1,W DR19,WDR48,MCM8,MAPK1,MNS1,DICER1,PTK2,SCARB1,EZH2,FASN,ITGAV,NIPBL,Dazap1,RAD51C,BRCA1,CDC25A,STK11,BIRC6,CCDC155,RANBP1,SI X5,HERC2,GSR,TOB2,PKD1,SCRIB,CDK2,KDM3A,PAFAH1B2,BRD2,GDNF,PDGFA,GADD45G,ABL1,NGF,PRKAG1,Ppp1cc,SP1,GLI3,CSTF2T,CIT,TCP1,ERF, CTDNEP1,E2F8,PANK2,let-7,XIAP,B4GALT1,VGF,BCL2L11,WNT5A |
| E2F3B    | Organ Morphology                             | 7.31E-06    | NR6A1,F2R,UBR2,TMEM38A,CDKN2C,KRAS,CCND1,ATP2A2,VEGFA,POR,CD2AP,RARA,MAP1S,HEY2,TP53,Irx5,CSR2,FOXH1,CRKL,PTCH1,HIRA,PLEC, HBEGF,ITPR1,HMGA1,ATF2,Marcks,ARHGAP5,ATE1,DOCK1,PEX2,DVL2,PATZ1,AHI1,FSCN1,KAT6A,E2F1,BTG2,LRP8,MAPK7,FYN,HIST1H1C,ADAM17,MA P2,CTNNA3,PDS5B,CDK4,FKBP1A,PSEN2,SRSF10,EP300,ID1,EFNB2,IGF1R,MC1R,VCL,HEXIM1,RXR,CYP51A1,AIFM1,SLC12A6,MYCN,KHDRBS1,AGO2 ,ID3,IGF2R,F3,BAK1,FADD,PLA2G4A,ZFPM2,ABL2,NDE1,CDKN1A,ADAM10,RBPJ,NCOR2,PAFAH1B1,TFB1M,SGCD,CASP7,NCAM1,DYRK1A,PSEN1,VTI1A, LHX2,MAPK1,KIF1B,WasI,RPGRIP1L,DICER1,LATS2,LMNB1,MYC,TGFBR2,PTK2,SERP1,SCARB1,PPP3R1,ITGAV,HTRA2,FBXO45,TAB1,SOX4,IGFBP6,UBE 4B,HDAC2,YWHAE,FGFR1,LMNA,WASF1,POFUT1,EIF4E2,PFKM,BCL2L1,PTPRS,LMNB2,CAPN2,JAG1,CDK2,RHBDF1,FOXP4,GDNF,PDGFA,ABL1,E2F3,PD CD10,BCAR1,ZMIZ1,ETV6,NFAT5,GLI3,BMPR1A,LDB1,FOXO3,MAML3,ERBB2,PRDM6,LASP1,PRKCA,VAV2,HSPG2,CAPZB,ADAM15,MTMR14,SMAD7,MEF2 A,MAPK9,NFATC4,SNX27,TCF7L1,FOXO1,MORF4L1,XIAP,RCAN1,PLEKHG5,ADAM9                                                                                                                                                                                                                                                   |
| E2F3B    | Hematopoiesis                                | 8.64E-06    | NPM1,RAF1,TGFBR1,CTCF,KRAS,CCND1,VEGFA,RARA,BAIAP2,ADA,ATF4,CBFB,KLF1,TP53,PAPD4,EEF2,FANCC,HMGA1,KLF13,TCF3,ADAR,IRF1,DOCK 1,PATZ1,BSG,KAT6A,E2F1,BTG2,TFRC,SRSF4,Meis1,SAC3D1,PRDX2,FYN,DEK,PIM3,PTPN2,PRDX1,ARHGFE7,CDK4,CEBPD,PSEN2,HMGB2,XRCC4,MAF G,ID1,CD47,YY1,HUS1,PDGFRA,CEBPA,TOP2A,PRKCE,NFE2L2,RPS19,DCK,MDM2,MAFK,IGF2R,SIN3A,KITLG,FADD,SEN1,AGPAT5,ZFPM2,MSH2,CSF1, CDKN1A,ADD1,GABPA,FEN1,MAFB,IREB2,ZFP36L2,PSEN1,FZR1,CDKN2A,SOCS3,PALLD,LHX2,MAPK1,SMAD3,DIAPH3,KLF6,FBXW7,ZFPM1,ABCC10,TG FBR2,MYC,TNRC6C,HIST1H4A,HIST1H4C,SCARB1,PIM1,MAPK3,HIST1H4I,MYBL2,HIST1H4J,PPP1R15B,STX11,ESCO2,SOX4,FSTL3,STK11,DIDO1,BIRC6, RAC1,TMOD3,POFUT1,KCNAB2,KMT2A,PFKM,BCL2L1,Cdc42,SH2B3,MAD1L1,TMPO,PML,JAG1,CDK2,UBE2I,RUNX1,ZFAT,PICALM,HIST2H4B,ABL1,SLC7A 1,SMAD5,PRKAG1,ZBTB24,ETV6,TNFRSF12A,SP1,GLI3,TIMP1,LDB1,SIPA1,FOXO3,RBM15,LRRRC8A,LONP1,PRKCA,SLC20A1,SOD1,DOCK7,RRS1,SLC7A6 OS,BIRC5,PRMT1,C19orf68,MLLT1,MAPK14,B4GALT1,SATB1,EIF2AK2,UBC                                                                                                                                                                                                                                                   |
| E2F3B    | Respiratory System Development and Function  | 1.26E-05    | CTGF,TGFBR1,RDH10,KRAS,HES1,SLC35C1,CCND1,POLB,VEGFA,RARA,FBLN1,ADA,HEY2,FRS2,STAT6,PTCH1,HBEGF,MAN1A2,ATF2,HSPB11,CELSR3, NOL7,ADAM17,BAG6,PSEN2,CDH11,EP300,ID1,NCOA2,CREB1,CEBPA,PDGFRA,BID,NFE2L2,PLOD3,MYCN,GAS1,RQCD1,GREM1,IGF2R,ZFPM2,SPRY2,C DKN1A,FEN1,PSEN1,LHX2,MAPK1,CAV2,FBXW7,RPGRIP1L,DICER1,ATXN1L,LMNB1,CEBPG,TGFBR2,SOX2,FGFR3,Gm21596/Hmgb1,MAP2K2,PPP3R1,W DPCP,MAPK3,TAB1,TOP3B,SOX4,FGFR1,ARRB2,TIMELESS,PKD1,DUSP1,LOXL1,PTPRS,LMNB2,CYLD,SUV420H1,RPL13A,TMTC3,PDGFA,BCLAF1,FUT8, ROR2,Cux1,SIX1,SP1,GLI3,BMPR1A,HAT1,LRRK2,MAPK9,FOXO1,GIT1,MORF4L1,TSHZ3,MAPK14,B4GALT1,FOXO1,NFIB,WNT5A                                                                                                                                                                                                                                                                                                                                                                                                                                                                                                                                                                                                       |
| E2F3B    | Cell Signaling                               | 1.58E-05    | RAF1,TGFBR1,MAPK1,SGK1,WasI,SLF2,FNIP2,HES1,RICTOR,PBK,CHAF1A,TGFBR2,VEGFA,SCO2,ZW10,CD2AP,CAMK2D,NUP93,TTBK2,SUMO1,MAPK3, NEK6,VAMP3,DARS,HIPK2,HK1,TP53,NDUFAF5,HCFC1,TRAF3IP1,SLC2A1,CSNK1G2,MITF,CSNK1D,RDX,NUP107,TBK1,TFAP4,HMGA1,FANCC,NDC1,KMT 2A,EPRS,DOCK1,TAF1,PKD1,NCLN,PRKACA,COX18,AHCTF1,CLSPN,MAPK7,PML,CDK2,FANCA,MORC3,CAPZA1,PICALM,PSEN2,NGF,SF3B3,EIF4EBP1,T RIM27,HLA- DMA,CHAF1B,GMNN,PRKCE,NUP205,STX4,PKD1,MAPKAPK2,SLC7A6,PRKCA,NDUFAF3,AIFM1,KPNA3,CAPZB,LRRK2,PLK1,MDM2,TUBGCP2,CDK1,FAF1, SPIDR,MAPK14,NUP153,ADD1,ATR,MAP4K4,DYRK1A,NCAM1                                                                                                                                                                                                                                                                                                                                                                                                                                                                                                                                                                                                                                                   |

## Supplemental Table 7. General IPA functions for E2F1, E2F3A and E2F3B promoter targets

| ChIP-seq | Category                               | B-H p-value | Genes                                                                                                                                                                                                                                                                                                                                                                                                                                                                                                                                                                                                                                                                                                                                                                                                                                                                                                                                                                                                                                                                                                                                                                                                                                                                                                                                                                                                                                                                                                                                                                                                                                                                                                                                                                                                                                                                                                                                                                                                                                                                                                                                                                                                                                                                                                                                                                                                                                                                                                                                                                                                   |
|----------|----------------------------------------|-------------|---------------------------------------------------------------------------------------------------------------------------------------------------------------------------------------------------------------------------------------------------------------------------------------------------------------------------------------------------------------------------------------------------------------------------------------------------------------------------------------------------------------------------------------------------------------------------------------------------------------------------------------------------------------------------------------------------------------------------------------------------------------------------------------------------------------------------------------------------------------------------------------------------------------------------------------------------------------------------------------------------------------------------------------------------------------------------------------------------------------------------------------------------------------------------------------------------------------------------------------------------------------------------------------------------------------------------------------------------------------------------------------------------------------------------------------------------------------------------------------------------------------------------------------------------------------------------------------------------------------------------------------------------------------------------------------------------------------------------------------------------------------------------------------------------------------------------------------------------------------------------------------------------------------------------------------------------------------------------------------------------------------------------------------------------------------------------------------------------------------------------------------------------------------------------------------------------------------------------------------------------------------------------------------------------------------------------------------------------------------------------------------------------------------------------------------------------------------------------------------------------------------------------------------------------------------------------------------------------------|
| E2F3B    | Hair and Skin Development and Function | 1.96E-05    | NPM1,RAF1,CTCF,TAB2,KRAS,CCND1,POLB,BOP1,SUMO1,CSTF2,CBFB,MGAT1,TP53,TFDP1,YAP1,CRKL,PTCH1,TBK1,ZBTB5,PTP4A1,ATF2,ATE1,KAT6A,FSCN1,E2F1,CHKA,TFRC,MAPK7,CYR61,PTN,PDS5B,CDK4,FKBP1A,MED28,EIF4EBP1,CREB1,IGF1R,CEBPA,DAB2,PEMT,OXTR,STT3B,POLG,PLK1,MDM2,F3,ZFPM2,SPDYA,ABL2,CDKN1A,ZFP36L2,ID4,CDKN2A,SOCS3,DLGAP5,LHX2,SMAD3,UNC5B,KLF6,FBXW7,ZFPM1,PINX1,LATS2,FGFR3,TGFBR2,MYC,HSPA4,EZH2,ITGAV,FBXO45,DLC1,PPP1R15B,FGFR1,PNN,RAC1,BIRC6,KMT2A,PKD1,TRIM39,RHOA,HSP90AA1,VDAC1,CDK2,TEAD4,PDCD10,IGF2BP1,ETV6,ZMIZ1,SP1,FOXO3,ERBB2,BLM,PRDM6,RASSF1,SMAD7,MAPK9,BIRC5,MORF4L1,AFF1,GNAI2,PRKCI,MAPK14,BRCA2,WNT5A                                                                                                                                                                                                                                                                                                                                                                                                                                                                                                                                                                                                                                                                                                                                                                                                                                                                                                                                                                                                                                                                                                                                                                                                                                                                                                                                                                                                                                                                                                                                                                                                                                                                                                                                                                                                                                                                                                                                                                                 |
| E2F3B    | Endocrine System Disorders             | 6.04E-05    | TPD52L2,CTCF,TGFBR1,PRKAB1,CCNB2,EIF4A2,POR,FBL,HCFC1,GART,DCLRE1A,ALCAM,CPOX,ECT2,FANCA,CPE,SNX17,BAG6,CEBPZ,SYNM,RABL6,NOTCH2,TIPARP,SLC12A6,EP400,TUBB4B,PASK,IGF2R,CDS2,MSH2,MAZ,CDKN2A,NAV2,RNF7,DEPDC5,ZDHHHC14,SMC1A,OSBPL1A,POLE4,HDAC2,POLR1B,RDX,PHRF1,TXNRD1,OSBPL8,CAND1,BCL2L1,GINS1,RAI1,PBRM1,ZC3H7B,KIAA0101,BARD1,RNASEH2B,E2F3,CLIC4,MARVELD1,PHLDB2,TARBP1,NFAT5,ERBB2,LASP1,RACGAP1,MED26,BIRC5,ALS2,FANCL,ZDHHHC3,BRCA2,RAP2B,ASPSR1,CTGF,F2R,DSTN,FAM20C,ZNF436,MKI67,FNDC3B,DDX20,HIST1H2AB,MGAT4B,TDP2,SLC39A13,PRIM2,DNMT1,PYCRL,PIK3C2B,TTC21A,PTPRG,TFDP1,MDC1,HBEGF,HMGA1,MED12,SPOP,SH3GL1,MYO9A,NCLN,ARRHGAP35,HAUS6,TFIP11,PLAGL1,POLQ,EIF4G1,DNAJA1,TYW1,EIF4EBP1,STOM,SCAF4,KAT2B,RINT1,IGF1R,NUP205,CEP152,BLMH,ELL,POLE,MDM2,SLIT2,F3,CDK1,RRM1,ZNF546,REV1,H2AFY,TRERF1,CLUH,NCAM1,FARP1,VPRBP,FBXW7,TIGD3,DICER1,TBC1D4,ZNF318,STAG1,DZIP3,ETS2,PGP,ABLIM2,PANK4,HK1,COL4A1,POLE2,MAT2B,HERC2,PALB2,COL6A3,CTDP1,LOXL1,SCRIB,HDGFRP3,SBNO2,CDK2,TMTC3,KMT2C,TRIM24,PRIM1,ZNF280B,GTPBP4,MAPKAPK2,YLPM1,UBR5,TRA2B,LRRK2,DOCK7,TSHZ3,CIART,Sf1,USP34,HIST1H2AM,NIPA2,MYH9,MAP6,HMMR,HAUS4,KRAS,DOCK11,ZC3H12C,EGFR2,CENPE,MTHFD2,TGIF2,ADORA2B,RNF121,TP53,TYMS,GNE,RRM2,TPM3,DDR1,TNPO2,SUPT16H,GAPDH,LTN1,RBM39,XRCC5,FAM188B,FBXO10,ARL4C,ODF2L,HNRNPA2B1,PDS5B,CDK4,CTDSPL,SLC25A40,CDKN3,KISS1R,CD47,PRR14L,SORBS1,DAB2,LAPTM4A,RAD21,MED20,CUL7,ING5,HSPA2,ZFPM2,ABCF2,CDKN1A,SEMA3C,FOXN2,WRAP53,FAM60A,VPS13A,KLF6,PARP2,SMC4,PINX1,STARD7,SART1,KIF16B,MYC,TGFBR2,ZW10,LEMD3,WDPCP,XPO1,MYBL2,BRIP1,PDZRN3,CNOT6,CLASP1,TOP3B,SMC3,DDX23,SIK2,SNX18,GM2A,TNPO1,DIDO1,SLC12A7,WASF1,TUSC3,ATAD2,TBL1X,TAF1,DUSP1,ETV4,HSP90AA1,NCKAP5L,RNF149,RUNX1,ARID1A,GTF2A1,IGF2BP1,MLH1,RAD50,TRA2A,RABEPK,POLR1C,DIAPH1,LYST,SPAG7,FANCD2,TIMP1,FOXO3,VARS,ZNF354A,TUBG1,FOXM1,AMPD2,NBN,HNRNPM,PDAP1,PMP22,LTBP3,PRKCI,MSH6,COX5A,TEAD3,WISP1,ATR,WNK1,APIP,CDKN2C,RAPH1,KPNA1,VEGFA,CXCL10,PRPF4B,CSTF2,IRS2,KMT2B,OTUD4,ACTR2,SMIM8,RCBTB2,PTBP1,POM121,POM121C,H2AFX,E2F1,LRP8,CYR61,EPHA2,TMEM74,HIST1H1C,ADAM17,PDIA3,PKD2,CAMK2N2,VCAN,CHEK1,EP300,COL5A1,TGFBRAP1,EFNB2,HECW1,TOP2A,PDGFRA,POLDIP3,LUZP1,AIFM1,mir-199,VPS18,CWC22,TBX3,SIN3A,KITLG,MUTYH,ADAM10,NCOR2,USP49,WDR19,SMARCAD1,FZR1,PHLDA1,MCM8,MAPK1,AURKB,TUBB,STMN1,PTK2,USF3,FGFR3,ARHGEF40,RORA,EZH2,ERLIN2,HTRA2,BRCA1,MYO10,ULK4,FGFR1,STK11,TBP,LMNA,SSRP1,WWP2,SRSF3,PKD1,LCORL,TUBE1,CASP2,NSMCE4A,MTDH,KDM3B,TNRC6B,GDNF,PKM,ABL1,NUP50,BCLAF1,EPHB6,EVC,CCDC88A,RABGGTB,LTBP4,RBM15,MCCC1,E2F8,S1PR2,BICD2,C2CD3,HDAC1,let-7,PSIP1,HIVEP2,GNAI2,FDPS,ENO1,UBQLN2,CAD,BCL2L11,SHMT2 |

**Supplemental Table 8. Significant differently expressed genes in 1KI HCC samples**

| Affymetrix ID | Gene Symbol       | Description                                                                                                                            | Transcript ID (Array Design) | 3aKO avg signal log2 (n=5) | 1KI Avg Signal log2 (n=5) | Fold Change (linear) | ANOVA p-value |
|---------------|-------------------|----------------------------------------------------------------------------------------------------------------------------------------|------------------------------|----------------------------|---------------------------|----------------------|---------------|
| 1416645_a_at  | Afp               | alpha fetoprotein                                                                                                                      | Mm.80.1                      | 3.7                        | 8.7                       | <b>31.0</b>          | 0.001         |
| 1448194_a_at  | H19               | H19, imprinted maternally expressed transcript; microRNA 675                                                                           | Mm.14802.1                   | 4.2                        | 8.4                       | <b>17.5</b>          | 0.001         |
| 1436879_x_at  | Afp               | alpha fetoprotein                                                                                                                      | Mm.80.5                      | 2.8                        | 6.7                       | <b>15.1</b>          | 0.006         |
| 1423140_at    | Lipa              | lysosomal acid lipase A                                                                                                                | Mm.181935.1                  | 6.1                        | 9.7                       | <b>12.1</b>          | 0.027         |
| 1416646_at    | Afp               | alpha fetoprotein                                                                                                                      | Mm.80.1                      | 5.7                        | 8.9                       | <b>9.4</b>           | 0.010         |
| 1424649_a_at  | Tspan8            | tetraspanin 8                                                                                                                          | Mm.22270.1                   | 4.2                        | 7.4                       | <b>9.0</b>           | 0.020         |
| 1419314_at    | Tinag             | tubulointerstitial nephritis antigen                                                                                                   | Mm.23199.1                   | 3.6                        | 6.5                       | <b>7.7</b>           | 0.003         |
| 1417507_at    | Cyb561            | cytochrome b-561                                                                                                                       | Mm.154456.1                  | 5.4                        | 8.1                       | <b>6.7</b>           | 0.008         |
| 1418457_at    | Cxcl14            | chemokine (C-X-C motif) ligand 14                                                                                                      | Mm.30211.1                   | 3.9                        | 6.6                       | <b>6.7</b>           | 0.000         |
| 1453473_a_at  | Dynlt1a           | dynein light chain Tctex-type 1A; dynein light chain Tctex-type 1B; dynein light chain Tctex-type 1C; dynein light chain Tctex-type 1F | Mm.1948.3                    | 7.4                        | 10.1                      | <b>6.6</b>           | 0.000         |
| 1460550_at    | Mtmt11            | myotubularin related protein 11                                                                                                        | Mm.24379.1                   | 4.7                        | 7.5                       | <b>6.5</b>           | 0.003         |
| 1424638_at    | Cdkn1a            | cyclin-dependent kinase inhibitor 1A (P21)                                                                                             | Mm.34446.2                   | 7.1                        | 9.8                       | <b>6.3</b>           | 0.000         |
| 1428116_a_at  | Dynlt1a           | dynein light chain Tctex-type 1A; dynein light chain Tctex-type 1B; dynein light chain Tctex-type 1C; dynein light chain Tctex-type 1F | Mm.1948.2                    | 8.1                        | 10.8                      | <b>6.2</b>           | 0.000         |
| 1452905_at    | Meg3              | maternally expressed 3                                                                                                                 | Mm.41602.1                   | 5.5                        | 8.1                       | <b>5.8</b>           | 0.018         |
| 1418191_at    | Usp18             | ubiquitin specific peptidase 18                                                                                                        | Mm.27498.1                   | 6.6                        | 9.1                       | <b>5.7</b>           | 0.001         |
| 1421679_a_at  | Cdkn1a            | cyclin-dependent kinase inhibitor 1A (P21)                                                                                             | Mm.34446.1                   | 7.1                        | 9.6                       | <b>5.7</b>           | 0.000         |
| 1436713_s_at  | Meg3              | maternally expressed 3                                                                                                                 | Mm.200506.1                  | 3.0                        | 5.4                       | <b>5.4</b>           | 0.022         |
| 1438752_at    | A230058F20<br>Rik | RIKEN cDNA A230058F20 gene                                                                                                             | Mm.74679.1                   | 3.4                        | 5.8                       | <b>5.4</b>           | 0.000         |
| 1443509_at    |                   |                                                                                                                                        | Mm.214915.1                  | 3.7                        | 6.1                       | <b>5.2</b>           | 0.010         |
| 1415822_at    | Scd2              | stearoyl-Coenzyme A desaturase 2                                                                                                       | Mm.193096.1                  | 6.4                        | 8.7                       | <b>4.9</b>           | 0.036         |
| 1441946_at    | Itih5             | inter-alpha (globulin) inhibitor H5                                                                                                    | Mm.77620.1                   | 4.8                        | 7.1                       | <b>4.9</b>           | 0.028         |
| 1417821_at    | D17H6S56E-5       | DNA segment, Chr 17, human D6S56E 5                                                                                                    | Mm.22506.1                   | 4.8                        | 7.1                       | <b>4.9</b>           | 0.020         |
| 1448754_at    | Rbp1              | retinol binding protein 1, cellular                                                                                                    | Mm.2450.1                    | 9.1                        | 11.3                      | <b>4.7</b>           | 0.002         |
| 1416930_at    | Ly6d              | lymphocyte antigen 6 complex, locus D                                                                                                  | Mm.878.1                     | 6.2                        | 8.4                       | <b>4.7</b>           | 0.013         |
| 1452183_a_at  | Meg3              | maternally expressed 3                                                                                                                 | Mm.154560.1                  | 7.1                        | 9.3                       | <b>4.6</b>           | 0.039         |
| 1451780_at    | Blnc1             | B cell linker                                                                                                                          | Mm.9749.1                    | 6.9                        | 9.1                       | <b>4.5</b>           | 0.020         |
| 1423555_a_at  | Ifi44             | interferon-induced protein 44                                                                                                          | Mm.30756.1                   | 5.4                        | 7.6                       | <b>4.4</b>           | 0.004         |
| 1419195_at    | Wfdc15b           | WAP four-disulfide core domain 15B                                                                                                     | Mm.10859.1                   | 6.0                        | 8.2                       | <b>4.4</b>           | 0.009         |
| 1424775_at    | Oas1a             | 2'-5' oligoadenylate synthetase 1A                                                                                                     | Mm.14301.1                   | 7.5                        | 9.6                       | <b>4.4</b>           | 0.000         |
| 1424339_at    | Oasl1             | 2'-5' oligoadenylate synthetase-like 1                                                                                                 | Mm.95479.1                   | 6.3                        | 8.4                       | <b>4.3</b>           | 0.001         |
| 1448595_a_at  | Bex1              | brain expressed gene 1                                                                                                                 | Mm.14768.1                   | 3.0                        | 5.1                       | <b>4.2</b>           | 0.027         |
| 1449254_at    | Spp1              | secreted phosphoprotein 1                                                                                                              | Mm.321.1                     | 9.0                        | 11.1                      | <b>4.1</b>           | 0.003         |
| 1418171_at    | Tceal8            | transcription elongation factor A (SII)-like 8                                                                                         | Mm.182094.1                  | 7.2                        | 9.2                       | <b>3.9</b>           | 0.005         |

**Supplemental Table 8. Significant differently expressed genes in 1KI HCC samples**

| Affymetrix ID | Gene Symbol | Description                                                 | Transcript ID (Array Design) | 3aKO avg signal log2 (n=5) | 1KI Avg Signal log2 (n=5) | Fold Change (linear) | ANOVA p-value |
|---------------|-------------|-------------------------------------------------------------|------------------------------|----------------------------|---------------------------|----------------------|---------------|
| 1434728_at    | Gria3       | glutamate receptor, ionotropic, AMPA3 (alpha 3)             | Mm.32184.1                   | 3.6                        | 5.6                       | <b>3.9</b>           | 0.001         |
| 1441388_at    |             |                                                             | Mm.65393.1                   | 3.4                        | 5.3                       | <b>3.7</b>           | 0.041         |
| 1417409_at    | Jun         | jun proto-oncogene                                          | Mm.482.1                     | 7.4                        | 9.2                       | <b>3.7</b>           | 0.000         |
| 1445328_at    | Col4a4      | collagen, type IV, alpha 4                                  | Mm.40253.1                   | 4.0                        | 5.9                       | <b>3.6</b>           | 0.030         |
| 1417244_a_at  | Irf7        | interferon regulatory factor 7                              | Mm.3233.1                    | 7.9                        | 9.7                       | <b>3.6</b>           | 0.005         |
| 1427878_at    | Cystm1      | cysteine-rich transmembrane module containing 1             | Mm.27841.1                   | 7.8                        | 9.6                       | <b>3.6</b>           | 0.013         |
| 1449145_a_at  | Cav1        | caveolin 1, caveolae protein                                | Mm.28278.1                   | 6.0                        | 7.9                       | <b>3.5</b>           | 0.021         |
| 1449002_at    | Phlda3      | pleckstrin homology-like domain, family A, member 3         | Mm.34346.1                   | 6.9                        | 8.7                       | <b>3.5</b>           | 0.000         |
| 1460406_at    | Pls1        | plastin 1 (I-isoform)                                       | Mm.11869.1                   | 6.8                        | 8.6                       | <b>3.5</b>           | 0.017         |
| 1434292_at    | Snhg11      | small nucleolar RNA host gene 11                            | Mm.200806.1                  | 3.1                        | 4.9                       | <b>3.4</b>           | 0.011         |
| 1418930_at    | Cxcl10      | chemokine (C-X-C motif) ligand 10                           | Mm.877.1                     | 6.5                        | 8.2                       | <b>3.4</b>           | 0.016         |
| 1450245_at    | Slc10a2     | solute carrier family 10, member 2                          | Mm.3500.1                    | 4.6                        | 6.4                       | <b>3.3</b>           | 0.006         |
| 1429159_at    | Itih5       | inter-alpha (globulin) inhibitor H5                         | Mm.2935.1                    | 6.2                        | 7.9                       | <b>3.3</b>           | 0.017         |
| 1455144_s_at  | Arhgap44    | Rho GTPase activating protein 44                            | Mm.18455.1                   | 4.7                        | 6.4                       | <b>3.2</b>           | 0.015         |
| 1417822_at    | D17H6S56E-5 | DNA segment, Chr 17, human D6S56E 5                         | Mm.22506.1                   | 6.4                        | 8.1                       | <b>3.2</b>           | 0.026         |
| 1431056_a_at  | Lpl         | lipoprotein lipase                                          | Mm.1514.2                    | 6.9                        | 8.6                       | <b>3.2</b>           | 0.013         |
| 1427514_at    | LOC624295   | uncharacterized LOC624295                                   | Mm.156929.1                  | 5.0                        | 6.7                       | <b>3.2</b>           | 0.000         |
| 1444139_at    | Ddit4l      | DNA-damage-inducible transcript 4-like                      | Mm.205420.1                  | 5.0                        | 6.7                       | <b>3.1</b>           | 0.004         |
| 1452956_a_at  | Ilf1        | interferon, alpha-inducible protein 27                      | Mm.2121.1                    | 10.5                       | 12.1                      | <b>3.1</b>           | 0.000         |
| 1417323_at    | Psrc1       | proline/serine-rich coiled-coil 1                           | Mm.23776.1                   | 3.8                        | 5.4                       | <b>3.0</b>           | 0.001         |
| 1417370_at    | Tff3        | trefoil factor 3, intestinal                                | Mm.4641.1                    | 5.9                        | 7.5                       | <b>3.0</b>           | 0.025         |
| 1450783_at    | Ifit1       | interferon-induced protein with tetratricopeptide repeats 1 | Mm.6718.1                    | 6.9                        | 8.6                       | <b>3.0</b>           | 0.003         |
| 1448261_at    | Cdh1        | cadherin 1                                                  | Mm.35605.1                   | 6.6                        | 8.2                       | <b>3.0</b>           | 0.024         |
| 1459333_at    |             |                                                             | Mm.17671.1                   | 4.9                        | 6.4                       | <b>3.0</b>           | 0.013         |
| 1433575_at    | Sox4        | SRY (sex determining region Y)-box 4                        | Mm.18789.2                   | 6.3                        | 7.9                       | <b>3.0</b>           | 0.005         |
| 1418320_at    | Prss8       | protease, serine 8 (prostasin)                              | Mm.5875.1                    | 5.5                        | 7.1                       | <b>3.0</b>           | 0.023         |
| 1450531_at    | H2-BI       | histocompatibility 2, blastocyst                            | Mm.34289.1                   | 5.8                        | 7.4                       | <b>3.0</b>           | 0.013         |
| 1429734_at    | 463243411R  | DNA damage-induced apoptosis suppressor                     | Mm.26468.1                   | 5.0                        | 6.6                       | <b>2.9</b>           | 0.010         |
| 1424594_at    | Samd4       | sterile alpha motif domain containing 4                     | Mm.20973.2                   | 6.5                        | 8.0                       | <b>2.9</b>           | 0.003         |
| 1449133_at    | Sprr1a      | small proline-rich protein 1A                               | Mm.625.1                     | 5.2                        | 6.7                       | <b>2.9</b>           | 0.041         |
| 1425120_x_at  | Ilf1        | interferon, alpha-inducible protein 27 like 2B              | Mm.46348.1                   | 7.6                        | 9.1                       | <b>2.9</b>           | 0.003         |
| 1437308_s_at  | F2r         | coagulation factor II (thrombin) receptor                   | Mm.24816.2                   | 8.7                        | 10.2                      | <b>2.9</b>           | 0.022         |
| 1456226_x_at  | Ddr1        | discoidin domain receptor family, member 1                  | Mm.5021.4                    | 3.5                        | 5.0                       | <b>2.8</b>           | 0.007         |
| 1436755_at    | Itih5       | inter-alpha (globulin) inhibitor H5                         | Mm.38459.1                   | 4.0                        | 5.5                       | <b>2.8</b>           | 0.048         |

**Supplemental Table 8. Significant differently expressed genes in 1KI HCC samples**

| Affymetrix ID | Gene Symbol    | Description                                                                                                                        | Transcript ID (Array Design) | 3aKO avg signal log2 (n=5) | 1KI Avg Signal log2 (n=5) | Fold Change (linear) | ANOVA p-value |
|---------------|----------------|------------------------------------------------------------------------------------------------------------------------------------|------------------------------|----------------------------|---------------------------|----------------------|---------------|
| 1456981_at    | Tmc7           | transmembrane channel-like gene family 7                                                                                           | Mm.33000.1                   | 5.1                        | 6.6                       | <b>2.8</b>           | 0.007         |
| 1451828_a_at  | Acsl4          | acyl-CoA synthetase long-chain family member 4                                                                                     | Mm.143689.2                  | 7.5                        | 9.0                       | <b>2.8</b>           | 0.013         |
| 1454904_at    | Mtm1           | X-linked myotubular myopathy gene 1                                                                                                | Mm.30502.2                   | 6.6                        | 8.0                       | <b>2.8</b>           | 0.006         |
| 1415904_at    | Lpl            | lipoprotein lipase                                                                                                                 | Mm.1514.1                    | 8.7                        | 10.2                      | <b>2.7</b>           | 0.019         |
| 1446368_at    | 9130221J18 Rik | RIKEN cDNA 9130221J18 gene                                                                                                         | Mm.37328.1                   | 6.3                        | 7.7                       | <b>2.7</b>           | 0.033         |
| 1428671_at    | 2200002D01 Rik | RIKEN cDNA 2200002D01 gene                                                                                                         | Mm.46332.1                   | 7.8                        | 9.2                       | <b>2.7</b>           | 0.013         |
| 1426628_at    | Tmem184c       | transmembrane protein 184C                                                                                                         | Mm.85137.1                   | 7.7                        | 9.1                       | <b>2.7</b>           | 0.000         |
| 1419658_at    | C920025E04 Rik | RIKEN cDNA C920025E04 gene; histocompatibility 2, T region locus 23; h-2 class I histocompatibility antigen, D-37 alpha chain-like | Mm.35016.1                   | 5.2                        | 6.6                       | <b>2.7</b>           | 0.042         |
| 1454757_s_at  | lfi27l1        | interferon, alpha-inducible protein 27                                                                                             | Mm.2121.2                    | 10.3                       | 11.7                      | <b>2.7</b>           | 0.000         |
| 1450852_s_at  | F2r            | coagulation factor II (thrombin) receptor                                                                                          | Mm.24816.1                   | 6.7                        | 8.1                       | <b>2.6</b>           | 0.021         |
| 1423556_at    | Akr1b7         | aldo-keto reductase family 1, member B7                                                                                            | Mm.14460.1                   | 5.1                        | 6.5                       | <b>2.6</b>           | 0.037         |
| 1426278_at    | lfi27l2a       | interferon, alpha-inducible protein 27 like 2A                                                                                     | Mm.46382.1                   | 6.5                        | 7.9                       | <b>2.6</b>           | 0.002         |
| 1431708_a_at  | Tia1           | cytotoxic granule-associated RNA binding protein 1                                                                                 | Mm.156851.2                  | 3.7                        | 5.1                       | <b>2.6</b>           | 0.012         |
| 1442049_at    |                |                                                                                                                                    | Mm.44860.1                   | 9.5                        | 10.9                      | <b>2.6</b>           | 0.030         |
| 1415823_at    | Scd2           | stearoyl-Coenzyme A desaturase 2                                                                                                   | Mm.193096.1                  | 6.1                        | 7.5                       | <b>2.6</b>           | 0.035         |
| 1440250_at    | Col4a4         | collagen, type IV, alpha 4                                                                                                         | Mm.107258.1                  | 4.0                        | 5.4                       | <b>2.5</b>           | 0.020         |
| 1415810_at    | Uhrf1          | ubiquitin-like, containing PHD and RING finger domains, 1                                                                          | Mm.42196.1                   | 4.6                        | 5.9                       | <b>2.5</b>           | 0.017         |

**Supplemental Table 8. Significant differently expressed genes in 1KI HCC samples**

| Affymetrix ID | Gene Symbol       | Description                                                                                                                                                                                                                                                                                                                                                                                                                                                                                                                                                                                                  | Transcript ID (Array Design) | 3aKO avg signal log2 (n=5) | 1KI Avg Signal log2 (n=5) | Fold Change (linear) | ANOVA p-value |
|---------------|-------------------|--------------------------------------------------------------------------------------------------------------------------------------------------------------------------------------------------------------------------------------------------------------------------------------------------------------------------------------------------------------------------------------------------------------------------------------------------------------------------------------------------------------------------------------------------------------------------------------------------------------|------------------------------|----------------------------|---------------------------|----------------------|---------------|
| 1452731_x_at  | Gm10340           | predicted gene 10340; predicted pseudogene 8348; predicted gene, 16525; predicted gene 2897; alpha-takusan pseudogene; predicted gene 3005; predicted gene 3095; predicted gene 3115; predicted gene 3164; predicted gene 3173; predicted gene 3239; predicted gene 3252; predicted gene 3264; predicted gene 3317; predicted gene 3373; predicted gene 3383; predicted gene, 3488; predicted gene 3500; predicted gene 3558; predicted gene 3636; predicted gene 3642; predicted gene 3667; predicted gene 3696; predicted gene 3739; predicted gene 5796; alpha takusan-like; uncharacterized LOC102638110 | Mm.204.1                     | 2.9                        | 4.2                       | <b>2.5</b>           | 0.039         |
| 1417389_at    | Gpc1              | glypican 1                                                                                                                                                                                                                                                                                                                                                                                                                                                                                                                                                                                                   | Mm.24193.1                   | 5.9                        | 7.2                       | <b>2.5</b>           | 0.012         |
| 1452951_at    | 2410089E03<br>Rik | RIKEN cDNA 2410089E03 gene                                                                                                                                                                                                                                                                                                                                                                                                                                                                                                                                                                                   | Mm.74311.1                   | 6.5                        | 7.8                       | <b>2.5</b>           | 0.040         |
| 1438824_at    | Slc20a1           | solute carrier family 20, member 1                                                                                                                                                                                                                                                                                                                                                                                                                                                                                                                                                                           | Mm.16757.3                   | 5.3                        | 6.6                       | <b>2.5</b>           | 0.024         |
| 1451538_at    | Sox9              | SRY (sex determining region Y)-box 9                                                                                                                                                                                                                                                                                                                                                                                                                                                                                                                                                                         | Mm.46607.1                   | 5.7                        | 7.0                       | <b>2.5</b>           | 0.026         |
| 1428626_at    | Lysmd2            | LysM, putative peptidoglycan-binding, domain containing 2                                                                                                                                                                                                                                                                                                                                                                                                                                                                                                                                                    | Mm.19119.1                   | 5.6                        | 6.9                       | <b>2.5</b>           | 0.041         |
| 1427883_a_at  | Col3a1            | collagen, type III, alpha 1                                                                                                                                                                                                                                                                                                                                                                                                                                                                                                                                                                                  | Mm.147387.1                  | 8.2                        | 9.5                       | <b>2.5</b>           | 0.007         |
| 1424950_at    | Sox9              | SRY (sex determining region Y)-box 9                                                                                                                                                                                                                                                                                                                                                                                                                                                                                                                                                                         | Mm.46607.1                   | 4.5                        | 5.8                       | <b>2.4</b>           | 0.023         |
| 1434278_at    | Mtm1              | X-linked myotubular myopathy gene 1                                                                                                                                                                                                                                                                                                                                                                                                                                                                                                                                                                          | Mm.30502.2                   | 6.9                        | 8.2                       | <b>2.4</b>           | 0.005         |
| 1453196_a_at  | Oasl2             | 2'-5' oligoadenylate synthetase-like 2                                                                                                                                                                                                                                                                                                                                                                                                                                                                                                                                                                       | Mm.27162.2                   | 5.1                        | 6.4                       | <b>2.4</b>           | 0.005         |
| 1419157_at    | Sox4              | SRY (sex determining region Y)-box 4                                                                                                                                                                                                                                                                                                                                                                                                                                                                                                                                                                         | Mm.18789.1                   | 4.7                        | 6.0                       | <b>2.4</b>           | 0.021         |
| 1452260_at    | Cidec             | cell death-inducing DFFA-like effector c                                                                                                                                                                                                                                                                                                                                                                                                                                                                                                                                                                     | Mm.10026.1                   | 4.3                        | 5.5                       | <b>2.4</b>           | 0.035         |
| 1428640_at    | Hsf2bp            | heat shock transcription factor 2 binding protein                                                                                                                                                                                                                                                                                                                                                                                                                                                                                                                                                            | Mm.75856.1                   | 6.8                        | 8.0                       | <b>2.3</b>           | 0.013         |
| 1426434_at    | Tmem43            | transmembrane protein 43                                                                                                                                                                                                                                                                                                                                                                                                                                                                                                                                                                                     | Mm.38801.1                   | 7.5                        | 8.7                       | <b>2.3</b>           | 0.001         |
| 1431176_at    | Chmp4c            | charged multivesicular body protein 4C                                                                                                                                                                                                                                                                                                                                                                                                                                                                                                                                                                       | Mm.24595.1                   | 5.6                        | 6.8                       | <b>2.3</b>           | 0.029         |
| 1418355_at    | Nucb2             | nucleobindin 2                                                                                                                                                                                                                                                                                                                                                                                                                                                                                                                                                                                               | Mm.9901.1                    | 6.0                        | 7.2                       | <b>2.3</b>           | 0.039         |
| 1434582_at    | Erc2              | ELKS/RAB6-interacting/CAST family member 2                                                                                                                                                                                                                                                                                                                                                                                                                                                                                                                                                                   | Mm.32667.1                   | 4.8                        | 6.0                       | <b>2.3</b>           | 0.018         |
| 1449153_at    | Mmp12             | matrix metalloproteinase 12                                                                                                                                                                                                                                                                                                                                                                                                                                                                                                                                                                                  | Mm.2055.1                    | 4.4                        | 5.6                       | <b>2.3</b>           | 0.002         |
| 1420827_a_at  | Ccng1             | cyclin G1                                                                                                                                                                                                                                                                                                                                                                                                                                                                                                                                                                                                    | Mm.2103.1                    | 8.5                        | 9.7                       | <b>2.3</b>           | 0.015         |

**Supplemental Table 8. Significant differently expressed genes in 1KI HCC samples**

| Affymetrix ID | Gene Symbol    | Description                                                                                                                                                                                                                                              | Transcript ID (Array Design) | 3aKO avg signal log2 (n=5) | 1KI Avg Signal log2 (n=5) | Fold Change (linear) | ANOVA p-value |
|---------------|----------------|----------------------------------------------------------------------------------------------------------------------------------------------------------------------------------------------------------------------------------------------------------|------------------------------|----------------------------|---------------------------|----------------------|---------------|
| 1431591_s_at  | Gm9706         | predicted gene 9706; ISG15 ubiquitin-like modifier                                                                                                                                                                                                       | Mm.204646.1                  | 6.5                        | 7.7                       | <b>2.3</b>           | 0.009         |
| 1452227_at    | Sel1l3         | sel-1 suppressor of lin-12-like 3 (C. elegans)                                                                                                                                                                                                           | Mm.24656.1                   | 6.2                        | 7.3                       | <b>2.3</b>           | 0.010         |
| 1416658_at    | Frzb           | frizzled-related protein                                                                                                                                                                                                                                 | Mm.3246.1                    | 4.1                        | 5.3                       | <b>2.3</b>           | 0.001         |
| 1434241_at    | Wdr67          | TBC1 domain family, member 31                                                                                                                                                                                                                            | Mm.31972.1                   | 7.3                        | 8.5                       | <b>2.3</b>           | 0.033         |
| 1448152_at    | Igf2           | insulin-like growth factor 2                                                                                                                                                                                                                             | Mm.3862.1                    | 6.0                        | 7.1                       | <b>2.3</b>           | 0.001         |
| 1448694_at    | Jun            | jun proto-oncogene                                                                                                                                                                                                                                       | Mm.482.1                     | 7.1                        | 8.2                       | <b>2.3</b>           | 0.002         |
| 1416529_at    | Emp1           | epithelial membrane protein 1                                                                                                                                                                                                                            | Mm.30024.1                   | 4.9                        | 6.1                       | <b>2.3</b>           | 0.030         |
| 1417960_at    | Cpeb1          | cytoplasmic polyadenylation element binding protein 1                                                                                                                                                                                                    | Mm.22062.1                   | 4.9                        | 6.0                       | <b>2.2</b>           | 0.004         |
| 1460351_at    | Gm12854        | predicted gene 12854; predicted gene 5068; S100 calcium binding protein A11 (calgizzarin)                                                                                                                                                                | Mm.175848.1                  | 8.2                        | 9.4                       | <b>2.2</b>           | 0.035         |
| 1416076_at    | Ccnb1          | cyclin B1; predicted gene 5593                                                                                                                                                                                                                           | Mm.22569.1                   | 3.7                        | 4.9                       | <b>2.2</b>           | 0.031         |
| 1439380_x_at  | Meg3           | maternally expressed 3                                                                                                                                                                                                                                   | Mm.154560.3                  | 7.5                        | 8.6                       | <b>2.2</b>           | 0.028         |
| 1448380_at    | Lgals3bp       | lectin, galactoside-binding, soluble, 3 binding protein                                                                                                                                                                                                  | Mm.3152.1                    | 9.5                        | 10.7                      | <b>2.2</b>           | 0.003         |
| 1425868_at    | Hist2h2bb      | histone cluster 2, H2bb                                                                                                                                                                                                                                  | Mm.214641.1                  | 5.5                        | 6.6                       | <b>2.2</b>           | 0.028         |
| 1418334_at    | Dbf4           | DBF4 homolog (S. cerevisiae)                                                                                                                                                                                                                             | Mm.22430.1                   | 4.7                        | 5.8                       | <b>2.2</b>           | 0.009         |
| 1438724_at    | Osbp13         | oxysterol binding protein-like 3                                                                                                                                                                                                                         | Mm.44153.1                   | 5.6                        | 6.7                       | <b>2.2</b>           | 0.047         |
| 1454254_s_at  | 1600029D21 Rik | placenta expressed transcript 1                                                                                                                                                                                                                          | Mm.195522.1                  | 4.6                        | 5.8                       | <b>2.2</b>           | 0.024         |
| 1418911_s_at  | Acsl4          | acyl-CoA synthetase long-chain family member 4                                                                                                                                                                                                           | Mm.143689.1                  | 8.2                        | 9.4                       | <b>2.2</b>           | 0.028         |
| 1449975_a_at  | Park2          | Parkinson disease (autosomal recessive, juvenile) 2, parkin                                                                                                                                                                                              | Mm.42046.1                   | 5.7                        | 6.8                       | <b>2.2</b>           | 0.001         |
| 1450017_at    | Ccng1          | cyclin G1                                                                                                                                                                                                                                                | Mm.2103.1                    | 8.1                        | 9.2                       | <b>2.2</b>           | 0.011         |
| 1418580_at    | Rtp4           | receptor transporter protein 4                                                                                                                                                                                                                           | Mm.180157.1                  | 8.5                        | 9.6                       | <b>2.2</b>           | 0.012         |
| 1438009_at    | Hist1h2ab      | histone cluster 1, H2ab; histone cluster 1, H2ac; histone cluster 1, H2ad; histone cluster 1, H2ae; histone cluster 1, H2ag; histone cluster 1, H2ah; histone cluster 1, H2ai; histone cluster 1, H2an; histone cluster 1, H2ao; histone cluster 1, H2ap | Mm.14767.2                   | 8.0                        | 9.1                       | <b>2.2</b>           | 0.004         |
| 1438665_at    | Smpd3          | sphingomyelin phosphodiesterase 3, neutral                                                                                                                                                                                                               | Mm.23298.1                   | 4.2                        | 5.3                       | <b>2.2</b>           | 0.049         |
| 1416492_at    | Ccne1          | cyclin E1                                                                                                                                                                                                                                                | Mm.16110.1                   | 5.9                        | 7.0                       | <b>2.2</b>           | 0.022         |
| 1418293_at    | Ifit2          | interferon-induced protein with tetratricopeptide repeats 2                                                                                                                                                                                              | Mm.2036.1                    | 4.9                        | 6.0                       | <b>2.2</b>           | 0.015         |
| 1418655_at    | B4galnt1       | beta-1,4-N-acetyl-galactosaminyl transferase 1                                                                                                                                                                                                           | Mm.1853.1                    | 4.6                        | 5.7                       | <b>2.2</b>           | 0.044         |
| 1423669_at    | Col1a1         | collagen, type I, alpha 1                                                                                                                                                                                                                                | Mm.22621.1                   | 6.0                        | 7.1                       | <b>2.2</b>           | 0.033         |
| 1443698_at    | Xaf1           | XIAP associated factor 1                                                                                                                                                                                                                                 | Mm.149240.1                  | 7.9                        | 9.0                       | <b>2.2</b>           | 0.008         |
| 1455162_at    | Ttc39a         | tetratricopeptide repeat domain 39A                                                                                                                                                                                                                      | Mm.23454.1                   | 6.5                        | 7.6                       | <b>2.2</b>           | 0.000         |

**Supplemental Table 8. Significant differently expressed genes in 1KI HCC samples**

| Affymetrix ID | Gene Symbol    | Description                                                                                  | Transcript ID (Array Design) | 3aKO avg signal log2 (n=5) | 1KI Avg Signal log2 (n=5) | Fold Change (linear) | ANOVA p-value |
|---------------|----------------|----------------------------------------------------------------------------------------------|------------------------------|----------------------------|---------------------------|----------------------|---------------|
| 1424245_at    | Ces2c          | carboxylesterase 2C;<br>carboxylesterase 2D, pseudogene                                      | Mm.28191.1                   | 8.9                        | 10.0                      | 2.1                  | 0.003         |
| 1433531_at    | Acsl4          | acyl-CoA synthetase long-chain family member 4                                               | Mm.12166.1                   | 8.3                        | 9.4                       | 2.1                  | 0.023         |
| 1451751_at    | Ddit4l         | DNA-damage-inducible transcript 4-like                                                       | Mm.195809.1                  | 5.1                        | 6.2                       | 2.1                  | 0.001         |
| 1415993_at    | Sqle           | squalene epoxidase                                                                           | Mm.22663.1                   | 11.0                       | 12.0                      | 2.1                  | 0.022         |
| 1420647_a_at  | Krt8           | keratin 8                                                                                    | Mm.6800.1                    | 10.9                       | 12.0                      | 2.1                  | 0.005         |
| 1424626_at    | 2010003K11 Rik | RIKEN cDNA 2010003K11 gene                                                                   | Mm.22966.1                   | 7.7                        | 8.8                       | 2.1                  | 0.025         |
| 1448314_at    | Cdk1           | cyclin-dependent kinase 1                                                                    | Mm.4761.1                    | 6.9                        | 7.9                       | 2.1                  | 0.023         |
| 1440085_at    | Eda2r          | ectodysplasin A2 receptor                                                                    | Mm.189270.1                  | 4.1                        | 5.2                       | 2.1                  | 0.038         |
| 1415698_at    | Golm1          | golgi membrane protein 1                                                                     | Mm.171335.1                  | 6.4                        | 7.4                       | 2.1                  | 0.022         |
| 1450016_at    | Ccng1          | cyclin G1                                                                                    | Mm.2103.1                    | 9.0                        | 10.1                      | 2.1                  | 0.007         |
| 1419091_a_at  | Anxa2          | annexin A2                                                                                   | Mm.584.1                     | 8.5                        | 9.6                       | 2.1                  | 0.030         |
| 1425913_a_at  | Spats2l        | spermatogenesis associated, serine-rich 2-like                                               | Mm.27691.2                   | 4.9                        | 6.0                       | 2.1                  | 0.001         |
| 1441793_at    |                |                                                                                              | Mm.117140.1                  | 7.3                        | 8.4                       | 2.1                  | 0.032         |
| 1451749_at    | Irak4          | interleukin-1 receptor-associated kinase 4                                                   | Mm.159942.2                  | 6.0                        | 7.1                       | 2.1                  | 0.009         |
| 1451777_at    | Ddx60          | DEAD (Asp-Glu-Ala-Asp) box polypeptide 60                                                    | Mm.33332.1                   | 5.2                        | 6.3                       | 2.1                  | 0.031         |
| 1453304_s_at  | Ly6e           | lymphocyte antigen 6 complex, locus E                                                        | Mm.204648.1                  | 12.0                       | 13.1                      | 2.1                  | 0.001         |
| 1420563_at    | Gria3          | glutamate receptor, ionotropic, AMPA3 (alpha 3)                                              | Mm.42021.1                   | 5.1                        | 6.2                       | 2.1                  | 0.000         |
| 1435819_at    |                |                                                                                              | Mm.99958.1                   | 6.2                        | 7.2                       | 2.1                  | 0.007         |
| 1436356_at    | Samd4          | sterile alpha motif domain containing 4                                                      | Mm.40604.1                   | 6.0                        | 7.0                       | 2.1                  | 0.008         |
| 1441137_at    | Bicc1          | bicaudal C homolog 1 (Drosophila)                                                            | Mm.179033.1                  | 4.8                        | 5.8                       | 2.1                  | 0.007         |
| 1449221_a_at  | Rrbp1          | ribosome binding protein 1                                                                   | Mm.13705.1                   | 10.8                       | 11.9                      | 2.1                  | 0.013         |
| 1423691_x_at  | Krt8           | keratin 8                                                                                    | Mm.6800.2                    | 10.8                       | 11.8                      | 2.0                  | 0.007         |
| 1423933_a_at  | 1600029D21 Rik | placenta expressed transcript 1                                                              | Mm.29959.1                   | 5.9                        | 6.9                       | 2.0                  | 0.022         |
| 1437162_at    |                |                                                                                              | Mm.116993.1                  | 6.0                        | 7.0                       | 2.0                  | 0.001         |
| 1438779_at    | Col4a3         | collagen, type IV, alpha 3                                                                   | Mm.113295.1                  | 3.4                        | 4.4                       | 2.0                  | 0.041         |
| 1434089_at    | Synpo          | synaptopodin                                                                                 | Mm.27313.1                   | 5.6                        | 6.7                       | 2.0                  | 0.002         |
| 1417965_at    | Plekha1        | pleckstrin homology domain containing, family A (phosphoinositide binding specific) member 1 | Mm.25248.1                   | 6.8                        | 7.8                       | 2.0                  | 0.017         |
| 1423484_at    | Bicc1          | bicaudal C homolog 1 (Drosophila)                                                            | Mm.46051.1                   | 6.2                        | 7.2                       | 2.0                  | 0.006         |
| 1435853_at    | Cyp2d12        | cytochrome P450, family 2, subfamily d, polypeptide 12                                       | Mm.104363.3                  | 5.0                        | 6.0                       | 2.0                  | 0.023         |
| 1449025_at    | Ifit3          | interferon-induced protein with tetratricopeptide repeats 3                                  | Mm.951.1                     | 6.8                        | 7.9                       | 2.0                  | 0.018         |
| 1415849_s_at  | Stmn1          | stathmin 1                                                                                   | Mm.28479.1                   | 7.5                        | 8.5                       | 2.0                  | 0.049         |



**Supplemental Table 8. Significant differently expressed genes in 1KI HCC samples**

| Affymetrix ID | Gene Symbol    | Description                                                             | Transcript ID (Array Design) | 3aKO avg signal log2 (n=5) | 1KI Avg Signal log2 (n=5) | Fold Change (linear) | ANOVA p-value |
|---------------|----------------|-------------------------------------------------------------------------|------------------------------|----------------------------|---------------------------|----------------------|---------------|
| 1417267_s_at  | Fkbp11         | FK506 binding protein 11                                                | Mm.30729.1                   | 7.2                        | 8.2                       | <b>2.0</b>           | 0.029         |
| 1424246_a_at  | Tes            | testis derived transcript                                               | Mm.88645.1                   | 5.5                        | 6.4                       | <b>2.0</b>           | 0.030         |
| 1427167_at    | Armcx4         | armadillo repeat containing, X-linked 4                                 | Mm.31961.1                   | 4.1                        | 5.1                       | <b>2.0</b>           | 0.007         |
| 1437609_at    | Ube2u          | ubiquitin-conjugating enzyme E2U (putative)                             | Mm.87383.1                   | 3.9                        | 4.9                       | <b>2.0</b>           | 0.013         |
| 1425567_a_at  | Anxa5          | annexin A5                                                              | Mm.1620.2                    | 9.2                        | 10.2                      | <b>2.0</b>           | 0.030         |
| 1455431_at    | Slc5a1         | solute carrier family 5 (sodium/glucose cotransporter), member 1        | Mm.25237.2                   | 2.9                        | 3.9                       | <b>2.0</b>           | 0.010         |
| 1415798_at    | Ddr1           | discoidin domain receptor family, member 1                              | Mm.5021.1                    | 5.0                        | 6.0                       | <b>2.0</b>           | 0.042         |
| 1416803_at    | Fkbp7          | FK506 binding protein 7                                                 | Mm.24720.1                   | 5.9                        | 6.9                       | <b>2.0</b>           | 0.012         |
| 1460603_at    | Samd9l         | sterile alpha motif domain containing 9-like                            | Mm.196013.1                  | 7.7                        | 8.7                       | <b>2.0</b>           | 0.013         |
| 1422587_at    | Tmem45a        | transmembrane protein 45a                                               | Mm.4992.1                    | 5.8                        | 6.8                       | <b>2.0</b>           | 0.018         |
| 1423904_a_at  | Pvr            | poliovirus receptor                                                     | Mm.134436.1                  | 5.6                        | 6.6                       | <b>2.0</b>           | 0.029         |
| 1449191_at    | Wfdc12         | WAP four-disulfide core domain 12                                       | Mm.6433.1                    | 5.8                        | 6.7                       | <b>2.0</b>           | 0.008         |
| 1452899_at    | Rian           | RNA imprinted and accumulated in nucleus                                | Mm.23086.2                   | 4.3                        | 5.3                       | <b>2.0</b>           | 0.049         |
| 1416698_a_at  | Cks1b          | CDC28 protein kinase 1b                                                 | Mm.3049.1                    | 9.4                        | 10.4                      | <b>2.0</b>           | 0.015         |
| 1419057_at    | Slc5a1         | solute carrier family 5 (sodium/glucose cotransporter), member 1        | Mm.25237.1                   | 4.9                        | 5.8                       | <b>2.0</b>           | 0.011         |
| 1422160_at    | H2-T24         | histocompatibility 2, T region locus 24                                 | Mm.14573.1                   | 4.7                        | 5.7                       | <b>2.0</b>           | 0.030         |
| 1426276_at    | Ifih1          | interferon induced with helicase C domain 1                             | Mm.21551.1                   | 8.9                        | 9.8                       | <b>2.0</b>           | 0.002         |
| 1435989_x_at  | Krt8           | keratin 8                                                               | Mm.6800.3                    | 10.6                       | 11.5                      | <b>2.0</b>           | 0.007         |
| 1454694_a_at  | Top2a          | topoisomerase (DNA) II alpha                                            | Mm.4237.3                    | 4.7                        | 5.7                       | <b>2.0</b>           | 0.047         |
| 1428066_at    | Ccdc120        | coiled-coil domain containing 120                                       | Mm.59673.1                   | 4.4                        | 5.4                       | <b>1.9</b>           | 0.030         |
| 1429139_at    | Otud7b         | OTU domain containing 7B                                                | Mm.3050.1                    | 7.0                        | 8.0                       | <b>1.9</b>           | 0.005         |
| 1434891_at    | Ptgfrn         | prostaglandin F2 receptor negative regulator                            | Mm.24807.1                   | 5.6                        | 6.6                       | <b>1.9</b>           | 0.031         |
| 1440862_at    |                |                                                                         | Mm.153468.1                  | 4.9                        | 5.9                       | <b>1.9</b>           | 0.000         |
| 1441081_a_at  | 1110038B12 Rik | RIKEN cDNA 1110038B12 gene                                              | Mm.28895.3                   | 8.8                        | 9.8                       | <b>1.9</b>           | 0.050         |
| 1450646_at    | Cyp51          | cytochrome P450, family 51                                              | Mm.140158.1                  | 10.2                       | 11.1                      | <b>1.9</b>           | 0.004         |
| 1450857_a_at  | Col1a2         | collagen, type I, alpha 2                                               | Mm.4482.1                    | 8.4                        | 9.3                       | <b>1.9</b>           | 0.006         |
| 1422684_a_at  | Exoc4          | exocyst complex component 4                                             | Mm.6925.1                    | 8.0                        | 8.9                       | <b>1.9</b>           | 0.011         |
| 1423110_at    | Col1a2         | collagen, type I, alpha 2                                               | Mm.4482.1                    | 5.4                        | 6.4                       | <b>1.9</b>           | 0.047         |
| 1417541_at    | Hells          | helicase, lymphoid specific                                             | Mm.57223.1                   | 4.0                        | 4.9                       | <b>1.9</b>           | 0.026         |
| 1418189_s_at  | Malat1         | metastasis associated lung adenocarcinoma transcript 1 (non-coding RNA) | Mm.218611.1                  | 7.2                        | 8.1                       | <b>1.9</b>           | 0.001         |
| 1418714_at    | Dusp8          | dual specificity phosphatase 8                                          | Mm.39725.1                   | 4.7                        | 5.7                       | <b>1.9</b>           | 0.010         |
| 1419398_a_at  | Reep5          | receptor accessory protein 5                                            | Mm.21251.1                   | 8.1                        | 9.1                       | <b>1.9</b>           | 0.012         |

**Supplemental Table 8. Significant differently expressed genes in 1KI HCC samples**

| Affymetrix ID | Gene Symbol    | Description                                                                | Transcript ID (Array Design) | 3aKO avg signal log2 (n=5) | 1KI Avg Signal log2 (n=5) | Fold Change (linear) | ANOVA p-value |
|---------------|----------------|----------------------------------------------------------------------------|------------------------------|----------------------------|---------------------------|----------------------|---------------|
| 1421670_a_at  | Irak4          | interleukin-1 receptor-associated kinase 4                                 | Mm.159942.1                  | 3.5                        | 4.4                       | <b>1.9</b>           | 0.010         |
| 1444326_at    |                |                                                                            | Mm.168098.1                  | 6.2                        | 7.1                       | <b>1.9</b>           | 0.019         |
| 1448393_at    | Cldn7          | claudin 7                                                                  | Mm.42189.1                   | 4.9                        | 5.9                       | <b>1.9</b>           | 0.006         |
| 1416689_at    | Tuft1          | tuftelin 1                                                                 | Mm.10214.1                   | 6.7                        | 7.7                       | <b>1.9</b>           | 0.028         |
| 1452954_at    | Ube2c          | ubiquitin-conjugating enzyme E2C                                           | Mm.89830.1                   | 5.8                        | 6.8                       | <b>1.9</b>           | 0.040         |
| 1457356_at    |                |                                                                            | Mm.80556.1                   | 5.7                        | 6.6                       | <b>1.9</b>           | 0.013         |
| 1428387_at    | Acsl3          | acyl-CoA synthetase long-chain family member 3                             | Mm.27944.1                   | 4.6                        | 5.5                       | <b>1.9</b>           | 0.049         |
| 1438635_x_at  | B930041F14 Rik | RIKEN cDNA B930041F14 gene                                                 | Mm.132095.1                  | 5.8                        | 6.8                       | <b>1.9</b>           | 0.002         |
| 1416250_at    | Btg2           | B cell translocation gene 2, anti-proliferative                            | Mm.903.1                     | 8.0                        | 8.9                       | <b>1.9</b>           | 0.018         |
| 1417019_a_at  | Cdc6           | cell division cycle 6                                                      | Mm.20912.1                   | 3.4                        | 4.4                       | <b>1.9</b>           | 0.002         |
| 1417116_at    | Slc6a8         | solute carrier family 6 (neurotransmitter transporter, creatine), member 8 | Mm.41401.1                   | 6.3                        | 7.3                       | <b>1.9</b>           | 0.018         |
| 1422685_at    | Exoc4          | exocyst complex component 4                                                | Mm.6925.1                    | 6.4                        | 7.3                       | <b>1.9</b>           | 0.013         |
| 1427020_at    | Scara3         | scavenger receptor class A, member 3                                       | Mm.44135.1                   | 5.2                        | 6.1                       | <b>1.9</b>           | 0.037         |
| 1433446_at    | Hmgcs1         | 3-hydroxy-3-methylglutaryl-Coenzyme A synthase 1                           | Mm.61526.4                   | 11.3                       | 12.2                      | <b>1.9</b>           | 0.028         |
| 1440912_at    | Rnf39          | ring finger protein 39                                                     | Mm.105324.1                  | 6.6                        | 7.5                       | <b>1.9</b>           | 0.034         |
| 1443941_at    | Ccdc149        | coiled-coil domain containing 149                                          | Mm.86468.1                   | 4.9                        | 5.9                       | <b>1.9</b>           | 0.021         |
| 1424921_at    | Bst2           | bone marrow stromal cell antigen 2                                         | Mm.143755.2                  | 10.5                       | 11.4                      | <b>1.9</b>           | 0.000         |
| 1431192_at    | Sorbs2         | sorbin and SH3 domain containing 2                                         | Mm.32247.1                   | 4.8                        | 5.7                       | <b>1.9</b>           | 0.004         |
| 1444438_at    | Cib3           | calcium and integrin binding family member 3                               | Mm.211247.1                  | 5.3                        | 6.2                       | <b>1.9</b>           | 0.013         |
| 1419853_a_at  | P2rx7          | purinergic receptor P2X, ligand-gated ion channel, 7                       | Mm.31661.2                   | 5.0                        | 5.9                       | <b>1.8</b>           | 0.043         |
| 1426123_a_at  | Rrbp1          | ribosome binding protein 1                                                 | Mm.13705.8                   | 9.3                        | 10.2                      | <b>1.8</b>           | 0.031         |
| 1431900_a_at  | Foxa3          | forkhead box A3                                                            | Mm.42260.2                   | 9.6                        | 10.5                      | <b>1.8</b>           | 0.017         |
| 1441811_x_at  | Tmem176a       | transmembrane protein 176A                                                 | Mm.200272.1                  | 10.8                       | 11.7                      | <b>1.8</b>           | 0.017         |
| 1456482_at    | Pik3r3         | phosphatidylinositol 3 kinase, regulatory subunit, polypeptide 3 (p55)     | Mm.94590.1                   | 5.2                        | 6.1                       | <b>1.8</b>           | 0.002         |
| 1418281_at    | Rad51          | RAD51 homolog                                                              | Mm.231.1                     | 3.8                        | 4.7                       | <b>1.8</b>           | 0.038         |
| 1448259_at    | Fstl1          | follistatin-like 1                                                         | Mm.22763.1                   | 5.8                        | 6.6                       | <b>1.8</b>           | 0.005         |
| 1438118_x_at  | Vim            | vimentin                                                                   | Mm.7.4                       | 5.8                        | 6.6                       | <b>1.8</b>           | 0.022         |
| 1442439_at    | W91776         | expressed sequence W91776                                                  | Mm.34265.1                   | 4.6                        | 5.5                       | <b>1.8</b>           | 0.019         |
| 1420965_a_at  | Enc1           | ectodermal-neural cortex 1                                                 | Mm.30502.1                   | 6.8                        | 7.6                       | <b>1.8</b>           | 0.008         |
| 1423909_at    | Tmem176a       | transmembrane protein 176A                                                 | Mm.27061.1                   | 11.9                       | 12.7                      | <b>1.8</b>           | 0.011         |
| 1427473_at    | Gstm3          | glutathione S-transferase, mu 3                                            | Mm.37199.1                   | 9.0                        | 9.8                       | <b>1.8</b>           | 0.041         |
| 1432579_at    | Rsph3a         | radial spoke 3A homolog (Chlamydomonas)                                    | Mm.159766.1                  | 5.2                        | 6.0                       | <b>1.8</b>           | 0.001         |
| 1433914_at    | Lipo1          | lipase, member O1                                                          | Mm.30678.1                   | 3.6                        | 4.4                       | <b>1.8</b>           | 0.025         |
| 1449353_at    | Zmat3          | zinc finger matrin type 3                                                  | Mm.35705.1                   | 7.2                        | 8.1                       | <b>1.8</b>           | 0.000         |

**Supplemental Table 8. Significant differently expressed genes in 1KI HCC samples**

| Affymetrix ID | Gene Symbol | Description                                                                                                                                                                               | Transcript ID (Array Design) | 3aKO avg signal log2 (n=5) | 1KI Avg Signal log2 (n=5) | Fold Change (linear) | ANOVA p-value |
|---------------|-------------|-------------------------------------------------------------------------------------------------------------------------------------------------------------------------------------------|------------------------------|----------------------------|---------------------------|----------------------|---------------|
| 1450295_s_at  | Pvr         | poliovirus receptor                                                                                                                                                                       | Mm.8071.1                    | 4.3                        | 5.1                       | <b>1.8</b>           | 0.022         |
| 1416543_at    | Nfe2l2      | nuclear factor, erythroid derived 2, like 2                                                                                                                                               | Mm.1025.1                    | 10.2                       | 11.1                      | <b>1.8</b>           | 0.009         |
| 1437992_x_at  | Gja1        | gap junction protein, alpha 1                                                                                                                                                             | Mm.4504.3                    | 7.1                        | 7.9                       | <b>1.8</b>           | 0.004         |
| 1438001_x_at  | Reep5       | receptor accessory protein 5                                                                                                                                                              | Mm.21251.3                   | 7.8                        | 8.7                       | <b>1.8</b>           | 0.009         |
| 1440166_x_at  | Htr1d       | 5-hydroxytryptamine (serotonin) receptor 1D                                                                                                                                               | Mm.40573.1                   | 3.7                        | 4.6                       | <b>1.8</b>           | 0.003         |
| 1458179_at    |             |                                                                                                                                                                                           | Mm.130940.1                  | 3.8                        | 4.7                       | <b>1.8</b>           | 0.009         |
| 1416802_a_at  | Cdca5       | cell division cycle associated 5                                                                                                                                                          | Mm.23526.1                   | 4.5                        | 5.4                       | <b>1.8</b>           | 0.027         |
| 1423319_at    | Hhex        | hematopoietically expressed homeobox                                                                                                                                                      | Mm.33896.1                   | 10.0                       | 10.8                      | <b>1.8</b>           | 0.045         |
| 1427474_s_at  | Gstm3       | glutathione S-transferase, mu 3                                                                                                                                                           | Mm.37199.1                   | 11.4                       | 12.3                      | <b>1.8</b>           | 0.025         |
| 1445966_at    |             |                                                                                                                                                                                           | Mm.182814.1                  | 5.4                        | 6.3                       | <b>1.8</b>           | 0.013         |
| 1448205_at    | Ccnb1       | cyclin B1; predicted gene 5593                                                                                                                                                            | Mm.22569.1                   | 4.0                        | 4.8                       | <b>1.8</b>           | 0.044         |
| 1448272_at    | Btg2        | B cell translocation gene 2, anti-proliferative                                                                                                                                           | Mm.903.1                     | 7.2                        | 8.0                       | <b>1.8</b>           | 0.023         |
| 1460416_s_at  | Csprs       | component of Sp100-rs; predicted pseudogene 15433; predicted gene 2666; predicted pseudogene 7609; uncharacterized LOC100041903; uncharacterized LOC100503923; component of Sp100-rs-like | Mm.99965.1                   | 6.7                        | 7.5                       | <b>1.8</b>           | 0.020         |
| 1416664_at    | Cdc20       | cell division cycle 20                                                                                                                                                                    | Mm.29931.1                   | 5.7                        | 6.5                       | <b>1.8</b>           | 0.030         |
| 1422534_at    | Cyp51       | cytochrome P450, family 51                                                                                                                                                                | Mm.140158.1                  | 6.2                        | 7.0                       | <b>1.8</b>           | 0.017         |
| 1433985_at    | Abi2        | abl-interactor 2                                                                                                                                                                          | Mm.40762.1                   | 5.2                        | 6.1                       | <b>1.8</b>           | 0.047         |
| 1446730_at    |             |                                                                                                                                                                                           | Mm.212815.1                  | 3.9                        | 4.7                       | <b>1.8</b>           | 0.026         |
| 1458296_at    |             |                                                                                                                                                                                           | Mm.202183.1                  | 5.1                        | 5.9                       | <b>1.8</b>           | 0.002         |
| 1458525_at    |             |                                                                                                                                                                                           | Mm.167985.1                  | 5.9                        | 6.7                       | <b>1.8</b>           | 0.039         |
| 1415811_at    | Uhrf1       | ubiquitin-like, containing PHD and RING finger domains, 1                                                                                                                                 | Mm.42196.1                   | 4.4                        | 5.2                       | <b>1.8</b>           | 0.027         |
| 1424942_a_at  | Myc         | myelocytomatosis oncogene                                                                                                                                                                 | Mm.2444.2                    | 6.8                        | 7.6                       | <b>1.8</b>           | 0.013         |
| 1436539_at    | Clmn        | calmin                                                                                                                                                                                    | Mm.22921.1                   | 6.4                        | 7.2                       | <b>1.8</b>           | 0.030         |
| 1415800_at    | Gja1        | gap junction protein, alpha 1                                                                                                                                                             | Mm.4504.1                    | 5.2                        | 6.0                       | <b>1.8</b>           | 0.003         |
| 1419156_at    | Sox4        | SRY (sex determining region Y)-box 4                                                                                                                                                      | Mm.18789.1                   | 4.9                        | 5.7                       | <b>1.8</b>           | 0.017         |
| 1422437_at    | Col5a2      | collagen, type V, alpha 2                                                                                                                                                                 | Mm.10299.1                   | 5.9                        | 6.7                       | <b>1.8</b>           | 0.023         |
| 1422686_s_at  | Exoc4       | exocyst complex component 4                                                                                                                                                               | Mm.6925.1                    | 7.2                        | 8.0                       | <b>1.8</b>           | 0.008         |
| 1427683_at    | Egr2        | early growth response 2                                                                                                                                                                   | Mm.1353.2                    | 3.2                        | 4.0                       | <b>1.8</b>           | 0.009         |
| 1436029_at    | Bicc1       | bicaudal C homolog 1 (Drosophila)                                                                                                                                                         | Mm.25695.2                   | 6.8                        | 7.6                       | <b>1.8</b>           | 0.009         |
| 1439787_at    | P2rx7       | purinergic receptor P2X, ligand-gated ion channel, 7                                                                                                                                      | Mm.31661.1                   | 6.5                        | 7.3                       | <b>1.8</b>           | 0.047         |
| 1441145_at    | Phf21a      | PHD finger protein 21A                                                                                                                                                                    | Mm.173646.1                  | 5.0                        | 5.8                       | <b>1.8</b>           | 0.004         |
| 1444424_at    |             |                                                                                                                                                                                           | Mm.218393.1                  | 4.0                        | 4.9                       | <b>1.8</b>           | 0.005         |
| 1455439_a_at  | Lgals1      | lectin, galactose binding, soluble 1                                                                                                                                                      | Mm.43831.3                   | 8.1                        | 8.9                       | <b>1.8</b>           | 0.009         |
| 1460378_a_at  | Tes         | testis derived transcript                                                                                                                                                                 | Mm.88645.2                   | 5.9                        | 6.7                       | <b>1.8</b>           | 0.040         |
| 1460521_a_at  | Nabp1       | nucleic acid binding protein 1                                                                                                                                                            | Mm.196290.2                  | 5.8                        | 6.6                       | <b>1.8</b>           | 0.043         |

**Supplemental Table 8. Significant differently expressed genes in 1KI HCC samples**

| <b>Affymetrix ID</b> | <b>Gene Symbol</b> | <b>Description</b>                                                                                         | <b>Transcript ID (Array Design)</b> | <b>3aKO avg signal log2 (n=5)</b> | <b>1KI Avg Signal log2 (n=5)</b> | <b>Fold Change (linear)</b> | <b>ANOVA p-value</b> |
|----------------------|--------------------|------------------------------------------------------------------------------------------------------------|-------------------------------------|-----------------------------------|----------------------------------|-----------------------------|----------------------|
| 1415919_at           | Npdc1              | neural proliferation, differentiation and control 1                                                        | Mm.1131.1                           | 6.9                               | 7.7                              | <b>1.8</b>                  | 0.015                |
| 1416067_at           | lfrd1              | interferon-related developmental regulator 1                                                               | Mm.168.1                            | 7.7                               | 8.5                              | <b>1.8</b>                  | 0.005                |
| 1416953_at           | Ctgf               | connective tissue growth factor                                                                            | Mm.1810.1                           | 7.5                               | 8.3                              | <b>1.8</b>                  | 0.003                |
| 1435110_at           | Unc5b              | unc-5 homolog B (C. elegans)                                                                               | Mm.4580.2                           | 6.7                               | 7.5                              | <b>1.8</b>                  | 0.044                |
| 1438945_x_at         | Gja1               | gap junction protein, alpha 1                                                                              | Mm.4504.5                           | 4.5                               | 5.3                              | <b>1.8</b>                  | 0.033                |
| 1449297_at           | Casp12             | caspase 12                                                                                                 | Mm.42163.1                          | 4.6                               | 5.4                              | <b>1.8</b>                  | 0.047                |
| 1455980_a_at         | Gas2l3             | growth arrest-specific 2 like 3                                                                            | Mm.11982.1                          | 4.3                               | 5.1                              | <b>1.8</b>                  | 0.010                |
| 1417911_at           | Ccna2              | cyclin A2                                                                                                  | Mm.4189.1                           | 5.2                               | 6.0                              | <b>1.7</b>                  | 0.035                |
| 1435655_at           | Rpl12              | ribosomal protein L12                                                                                      | Mm.70127.3                          | 6.5                               | 7.3                              | <b>1.7</b>                  | 0.003                |
| 1435948_at           | Tmem181a           | transmembrane protein 181A; transmembrane protein 181B, pseudogene; transmembrane protein 181C, pseudogene | Mm.39489.1                          | 5.8                               | 6.6                              | <b>1.7</b>                  | 0.029                |
| 1460259_s_at         | Clca1              | chloride channel calcium activated 1; chloride channel calcium activated 2                                 | Mm.20897.1                          | 6.4                               | 7.2                              | <b>1.7</b>                  | 0.004                |
| 1435437_at           | Setd7              | SET domain containing (lysine methyltransferase) 7                                                         | Mm.39291.1                          | 7.3                               | 8.0                              | <b>1.7</b>                  | 0.012                |
| 1439377_x_at         | Cdc20              | cell division cycle 20                                                                                     | Mm.29931.4                          | 5.4                               | 6.2                              | <b>1.7</b>                  | 0.048                |
| 1448211_at           | Atp6v0e2           | ATPase, H+ transporting, lysosomal V0 subunit E2                                                           | Mm.30214.1                          | 6.5                               | 7.3                              | <b>1.7</b>                  | 0.002                |
| 1448441_at           | Cks1b              | CDC28 protein kinase 1b                                                                                    | Mm.3049.1                           | 8.4                               | 9.2                              | <b>1.7</b>                  | 0.018                |
| 1416431_at           | Tubb6              | tubulin, beta 6 class V                                                                                    | Mm.181860.1                         | 7.7                               | 8.4                              | <b>1.7</b>                  | 0.016                |
| 1416927_at           | Trp53inp1          | transformation related protein 53 inducible nuclear protein 1                                              | Mm.28708.1                          | 7.4                               | 8.2                              | <b>1.7</b>                  | 0.005                |
| 1418949_at           | Gdf15              | growth differentiation factor 15                                                                           | Mm.31325.1                          | 7.4                               | 8.2                              | <b>1.7</b>                  | 0.016                |
| 1448182_a_at         | Cd24a              | CD24a antigen                                                                                              | Mm.6417.1                           | 6.1                               | 6.9                              | <b>1.7</b>                  | 0.024                |
| 1456139_at           | Airn               | antisense Igf2r RNA                                                                                        | Mm.138484.1                         | 6.3                               | 7.1                              | <b>1.7</b>                  | 0.014                |
| 1419573_a_at         | Lgals1             | lectin, galactose binding, soluble 1                                                                       | Mm.43831.1                          | 8.4                               | 9.2                              | <b>1.7</b>                  | 0.010                |
| 1424022_at           | Osgin1             | oxidative stress induced growth inhibitor 1                                                                | Mm.34045.1                          | 10.4                              | 11.2                             | <b>1.7</b>                  | 0.036                |
| 1424511_at           | Aurka              | aurora kinase A                                                                                            | Mm.11738.1                          | 4.8                               | 5.5                              | <b>1.7</b>                  | 0.006                |
| 1425349_a_at         | Myef2              | myelin basic protein expression factor 2, repressor                                                        | Mm.18535.1                          | 4.8                               | 5.5                              | <b>1.7</b>                  | 0.038                |
| 1451335_at           | Plac8              | placenta-specific 8                                                                                        | Mm.34609.1                          | 8.3                               | 9.0                              | <b>1.7</b>                  | 0.029                |
| 1452197_at           | Smc4               | structural maintenance of chromosomes 4                                                                    | Mm.206841.1                         | 7.7                               | 8.4                              | <b>1.7</b>                  | 0.004                |
| 1454301_at           | 2900073C17 Rik     | RIKEN cDNA 2900073C17 gene                                                                                 | Mm.158924.1                         | 5.1                               | 5.8                              | <b>1.7</b>                  | 0.002                |
| 1416926_at           | Trp53inp1          | transformation related protein 53 inducible nuclear protein 1                                              | Mm.28708.1                          | 9.4                               | 10.1                             | <b>1.7</b>                  | 0.009                |
| 1438434_at           | Arhgap11a          | Rho GTPase activating protein 11A                                                                          | Mm.45753.1                          | 5.3                               | 6.1                              | <b>1.7</b>                  | 0.009                |
| 1459098_at           |                    |                                                                                                            | Mm.173922.1                         | 5.6                               | 6.3                              | <b>1.7</b>                  | 0.000                |
| 1433643_at           | Cacna2d1           | calcium channel, voltage-dependent, alpha2/delta subunit 1                                                 | Mm.25672.1                          | 4.9                               | 5.7                              | <b>1.7</b>                  | 0.001                |
| 1439489_at           | Ffar4              | free fatty acid receptor 4                                                                                 | Mm.35288.1                          | 4.5                               | 5.3                              | <b>1.7</b>                  | 0.035                |

**Supplemental Table 8. Significant differently expressed genes in 1KI HCC samples**

| Affymetrix ID | Gene Symbol    | Description                                                                                                                                         | Transcript ID (Array Design) | 3aKO avg signal log2 (n=5) | 1KI Avg Signal log2 (n=5) | Fold Change (linear) | ANOVA p-value |
|---------------|----------------|-----------------------------------------------------------------------------------------------------------------------------------------------------|------------------------------|----------------------------|---------------------------|----------------------|---------------|
| 1449483_at    | Polk           | polymerase (DNA directed), kappa                                                                                                                    | Mm.89926.1                   | 6.7                        | 7.4                       | <b>1.7</b>           | 0.002         |
| 1457619_at    | Ces2b          | carboxyesterase 2B                                                                                                                                  | Mm.117410.1                  | 3.3                        | 4.1                       | <b>1.7</b>           | 0.020         |
| 1424278_a_at  | Birc5          | baculoviral IAP repeat-containing 5                                                                                                                 | Mm.8552.2                    | 4.4                        | 5.2                       | <b>1.7</b>           | 0.044         |
| 1426381_at    | Pprc1          | peroxisome proliferative activated receptor, gamma, coactivator-related 1                                                                           | Mm.2415.1                    | 7.0                        | 7.8                       | <b>1.7</b>           | 0.042         |
| 1427718_a_at  | Mdm2           | transformed mouse 3T3 cell double minute 2                                                                                                          | Mm.22670.2                   | 8.2                        | 8.9                       | <b>1.7</b>           | 0.000         |
| 1456292_a_at  | Vim            | vimentin                                                                                                                                            | Mm.7.4                       | 5.7                        | 6.5                       | <b>1.7</b>           | 0.033         |
| 1460732_a_at  | Ppl            | periplakin                                                                                                                                          | Mm.10225.1                   | 7.0                        | 7.8                       | <b>1.7</b>           | 0.036         |
| 1430172_a_at  | Cyp4f16        | cytochrome P450, family 4, subfamily f, polypeptide 16; cytochrome P450, family 4, subfamily f, polypeptide 37                                      | Mm.30504.2                   | 6.3                        | 7.1                       | <b>1.7</b>           | 0.044         |
| 1460243_at    | Sptlc2         | serine palmitoyltransferase, long chain base subunit 2                                                                                              | Mm.565.1                     | 7.7                        | 8.5                       | <b>1.7</b>           | 0.029         |
| 1416342_at    | Tnc            | tenascin C                                                                                                                                          | Mm.980.1                     | 4.6                        | 5.4                       | <b>1.7</b>           | 0.010         |
| 1417327_at    | Cav2           | caveolin 2                                                                                                                                          | Mm.31915.1                   | 7.1                        | 7.9                       | <b>1.7</b>           | 0.040         |
| 1418004_a_at  | Tmem176b       | transmembrane protein 176B                                                                                                                          | Mm.28385.1                   | 11.9                       | 12.7                      | <b>1.7</b>           | 0.018         |
| 1425398_at    | Hist1h2bf      | histone cluster 1, H2bf; histone cluster 1, H2bj; histone cluster 1, H2bl; histone cluster 1, H2bn; histone cluster 1, H2bq; histone cluster 1 H2br | Mm.21579.2                   | 3.2                        | 4.0                       | <b>1.7</b>           | 0.011         |
| 1425911_a_at  | Fgfr1          | fibroblast growth factor receptor 1                                                                                                                 | Mm.3157.3                    | 5.2                        | 5.9                       | <b>1.7</b>           | 0.015         |
| 1450020_at    | Cx3cr1         | chemokine (C-X3-C motif) receptor 1                                                                                                                 | Mm.44065.1                   | 5.1                        | 5.8                       | <b>1.7</b>           | 0.028         |
| 1451122_at    | Idi1           | isopentenyl-diphosphate delta isomerase                                                                                                             | Mm.29847.1                   | 11.7                       | 12.5                      | <b>1.7</b>           | 0.015         |
| 1417837_at    | Phlda2         | pleckstrin homology-like domain, family A, member 2                                                                                                 | Mm.23697.1                   | 5.6                        | 6.4                       | <b>1.7</b>           | 0.020         |
| 1419070_at    | Cys1           | cystin 1                                                                                                                                            | Mm.52265.1                   | 7.1                        | 7.9                       | <b>1.7</b>           | 0.002         |
| 1426806_at    | Nabp1          | nucleic acid binding protein 1                                                                                                                      | Mm.196290.1                  | 7.2                        | 7.9                       | <b>1.7</b>           | 0.029         |
| 1434748_at    | Ckap2          | cytoskeleton associated protein 2                                                                                                                   | Mm.22448.1                   | 5.6                        | 6.3                       | <b>1.7</b>           | 0.010         |
| 1451224_at    | Scamp5         | secretory carrier membrane protein 5                                                                                                                | Mm.102278.2                  | 7.1                        | 7.9                       | <b>1.7</b>           | 0.008         |
| 1423957_at    | Aen            | apoptosis enhancing nuclease                                                                                                                        | Mm.34109.2                   | 8.5                        | 9.2                       | <b>1.6</b>           | 0.027         |
| 1426774_at    | Parp12         | poly (ADP-ribose) polymerase family, member 12                                                                                                      | Mm.29894.1                   | 8.8                        | 9.5                       | <b>1.6</b>           | 0.019         |
| 1426817_at    | Mki67          | antigen identified by monoclonal antibody Ki 67                                                                                                     | Mm.4078.1                    | 5.0                        | 5.7                       | <b>1.6</b>           | 0.033         |
| 1443095_at    |                |                                                                                                                                                     | Mm.127026.1                  | 4.1                        | 4.8                       | <b>1.6</b>           | 0.033         |
| 1448682_at    | Dynll1         | dynein light chain LC8-type 1                                                                                                                       | Mm.29908.1                   | 9.9                        | 10.6                      | <b>1.6</b>           | 0.039         |
| 1417817_a_at  | Wwtr1          | WW domain containing transcription regulator 1                                                                                                      | Mm.28060.1                   | 7.0                        | 7.7                       | <b>1.6</b>           | 0.030         |
| 1419089_at    | Timp3          | tissue inhibitor of metalloproteinase 3                                                                                                             | Mm.4871.1                    | 7.4                        | 8.1                       | <b>1.6</b>           | 0.006         |
| 1430201_at    | 9130017K11 Rik | RIKEN cDNA 9130017K11 gene                                                                                                                          | Mm.158885.1                  | 3.7                        | 4.4                       | <b>1.6</b>           | 0.008         |
| 1459632_at    |                |                                                                                                                                                     | Mm.217722.1                  | 5.0                        | 5.6                       | <b>1.6</b>           | 0.008         |

**Supplemental Table 8. Significant differently expressed genes in 1KI HCC samples**

| Affymetrix ID | Gene Symbol | Description                                                                                                                       | Transcript ID (Array Design) | 3aKO avg signal log2 (n=5) | 1KI Avg Signal log2 (n=5) | Fold Change (linear) | ANOVA p-value |
|---------------|-------------|-----------------------------------------------------------------------------------------------------------------------------------|------------------------------|----------------------------|---------------------------|----------------------|---------------|
| 1416579_a_at  | Epcam       | epithelial cell adhesion molecule                                                                                                 | Mm.4259.1                    | 6.0                        | 6.7                       | <b>1.6</b>           | 0.012         |
| 1418260_at    | Hunk        | hormonally upregulated Neu-associated kinase                                                                                      | Mm.25120.1                   | 6.7                        | 7.3                       | <b>1.6</b>           | 0.017         |
| 1418456_a_at  | Cxcl14      | chemokine (C-X-C motif) ligand 14                                                                                                 | Mm.30211.1                   | 6.4                        | 7.1                       | <b>1.6</b>           | 0.002         |
| 1419518_at    | Tuba8       | tubulin, alpha 8                                                                                                                  | Mm.32884.1                   | 5.7                        | 6.4                       | <b>1.6</b>           | 0.034         |
| 1419943_s_at  | Ccnb1       | cyclin B1; predicted gene 5593                                                                                                    | Mm.195316.1                  | 5.3                        | 5.9                       | <b>1.6</b>           | 0.023         |
| 1424880_at    | Trib1       | tribbles homolog 1 (Drosophila)                                                                                                   | Mm.40298.1                   | 8.4                        | 9.1                       | <b>1.6</b>           | 0.049         |
| 1427005_at    | Plk2        | polo-like kinase 2                                                                                                                | Mm.380.1                     | 7.9                        | 8.6                       | <b>1.6</b>           | 0.003         |
| 1427386_at    | Arhgef16    | Rho guanine nucleotide exchange factor (GEF) 16                                                                                   | Mm.38481.1                   | 6.0                        | 6.7                       | <b>1.6</b>           | 0.019         |
| 1435353_a_at  | Pisd-ps1    | phosphatidylserine decarboxylase, pseudogene 1; phosphatidylserine decarboxylase, pseudogene 3                                    | Mm.30245.3                   | 9.2                        | 9.9                       | <b>1.6</b>           | 0.006         |
| 1450061_at    | Enc1        | ectodermal-neural cortex 1                                                                                                        | Mm.30502.1                   | 6.6                        | 7.3                       | <b>1.6</b>           | 0.004         |
| 1419088_at    | Timp3       | tissue inhibitor of metalloproteinase 3                                                                                           | Mm.4871.1                    | 6.3                        | 6.9                       | <b>1.6</b>           | 0.003         |
| 1421063_s_at  | Snrpn       | small nuclear ribonucleoprotein N; SNRPN upstream reading frame                                                                   | Mm.195990.1                  | 7.1                        | 7.8                       | <b>1.6</b>           | 0.019         |
| 1422018_at    | Hivep2      | human immunodeficiency virus type I enhancer binding protein 2                                                                    | Mm.42157.1                   | 5.6                        | 6.3                       | <b>1.6</b>           | 0.023         |
| 1422140_at    | Gm7609      | component of Sp100-rs; predicted gene 2666; predicted pseudogene 7609; uncharacterized LOC100041903; uncharacterized LOC100503923 | Mm.207045.1                  | 6.4                        | 7.0                       | <b>1.6</b>           | 0.011         |
| 1428209_at    | Bex4        | brain expressed gene 4                                                                                                            | Mm.14768.2                   | 3.1                        | 3.8                       | <b>1.6</b>           | 0.019         |
| 1429204_at    | Camk2n2     | calcium/calmodulin-dependent protein kinase II inhibitor 2                                                                        | Mm.31199.1                   | 5.8                        | 6.5                       | <b>1.6</b>           | 0.021         |
| 1429233_at    | Sept11      | septin 11                                                                                                                         | Mm.27384.1                   | 8.2                        | 8.9                       | <b>1.6</b>           | 0.001         |
| 1441129_at    |             |                                                                                                                                   | Mm.207515.1                  | 4.0                        | 4.7                       | <b>1.6</b>           | 0.000         |
| 1448568_a_at  | Slc20a1     | solute carrier family 20, member 1                                                                                                | Mm.16757.1                   | 9.3                        | 10.0                      | <b>1.6</b>           | 0.013         |
| 1449024_a_at  | Hexa        | hexosaminidase A                                                                                                                  | Mm.2284.1                    | 9.4                        | 10.1                      | <b>1.6</b>           | 0.043         |
| 1452242_at    | Cep55       | centrosomal protein 55                                                                                                            | Mm.9916.1                    | 3.6                        | 4.3                       | <b>1.6</b>           | 0.047         |
| 1415834_at    | Dusp6       | dual specificity phosphatase 6                                                                                                    | Mm.1791.1                    | 9.6                        | 10.3                      | <b>1.6</b>           | 0.037         |
| 1418711_at    | Pdgfa       | platelet derived growth factor, alpha                                                                                             | Mm.2675.1                    | 6.7                        | 7.4                       | <b>1.6</b>           | 0.003         |
| 1418943_at    | B230120H23  | sterile alpha motif and leucine zipper containing kinase AZK                                                                      | Mm.33127.1                   | 6.3                        | 6.9                       | <b>1.6</b>           | 0.020         |
| 1423605_a_at  | Mdm2        | transformed mouse 3T3 cell double minute 2                                                                                        | Mm.22670.1                   | 8.9                        | 9.5                       | <b>1.6</b>           | 0.000         |
| 1424394_at    | Selm        | selenoprotein M                                                                                                                   | Mm.34046.1                   | 5.9                        | 6.5                       | <b>1.6</b>           | 0.041         |
| 1427884_at    | Col3a1      | collagen, type III, alpha 1                                                                                                       | Mm.147387.1                  | 4.3                        | 5.0                       | <b>1.6</b>           | 0.045         |
| 1428146_s_at  | Acaa2       | acetyl-Coenzyme A acyltransferase 2 (mitochondrial 3-oxoacyl-Coenzyme A thiolase)                                                 | Mm.142498.1                  | 12.1                       | 12.8                      | <b>1.6</b>           | 0.011         |
| 1436847_s_at  | Cdca8       | cell division cycle associated 8                                                                                                  | Mm.28038.2                   | 5.9                        | 6.5                       | <b>1.6</b>           | 0.010         |
| 1438408_at    | Sowahb      | sosondowah ankyrin repeat domain family member B                                                                                  | Mm.76746.1                   | 7.3                        | 8.0                       | <b>1.6</b>           | 0.050         |
| 1445144_at    |             |                                                                                                                                   | Mm.173903.1                  | 6.9                        | 7.5                       | <b>1.6</b>           | 0.005         |

**Supplemental Table 8. Significant differently expressed genes in 1KI HCC samples**

| Affymetrix ID | Gene Symbol   | Description                                                 | Transcript ID (Array Design) | 3aKO avg signal log2 (n=5) | 1KI Avg Signal log2 (n=5) | Fold Change (linear) | ANOVA p-value |
|---------------|---------------|-------------------------------------------------------------|------------------------------|----------------------------|---------------------------|----------------------|---------------|
| 1450342_at    | Bmp8b         | bone morphogenetic protein 8b                               | Mm.30413.1                   | 3.8                        | 4.4                       | <b>1.6</b>           | 0.023         |
| 1450843_a_at  | Serpinh1      | serine (or cysteine) peptidase inhibitor, clade H, member 1 | Mm.22708.1                   | 6.4                        | 7.0                       | <b>1.6</b>           | 0.013         |
| 1450986_at    | Nop58         | NOP58 ribonucleoprotein                                     | Mm.10303.1                   | 7.7                        | 8.3                       | <b>1.6</b>           | 0.020         |
| 1460583_at    | Golt1b        | golgi transport 1 homolog B (S. cerevisiae)                 | Mm.80325.1                   | 3.6                        | 4.3                       | <b>1.6</b>           | 0.040         |
| 1415890_at    | Papss1        | 3'-phosphoadenosine 5'-phosphosulfate synthase 1            | Mm.18161.1                   | 8.4                        | 9.0                       | <b>1.6</b>           | 0.047         |
| 1415935_at    | Smoc2         | SPARC related modular calcium binding 2                     | Mm.30162.1                   | 5.8                        | 6.5                       | <b>1.6</b>           | 0.004         |
| 1417450_a_at  | Tacc3         | transforming, acidic coiled-coil containing protein 3       | Mm.27836.1                   | 4.4                        | 5.1                       | <b>1.6</b>           | 0.045         |
| 1424050_s_at  | Fgfr1         | fibroblast growth factor receptor 1                         | Mm.3157.2                    | 5.8                        | 6.4                       | <b>1.6</b>           | 0.022         |
| 1427137_at    | Ces2e         | carboxylesterase 2E                                         | Mm.218630.1                  | 9.7                        | 10.4                      | <b>1.6</b>           | 0.032         |
| 1429234_s_at  | Sept11        | septin 11                                                   | Mm.27384.1                   | 8.2                        | 8.9                       | <b>1.6</b>           | 0.000         |
| 1434240_at    | 4632434I11Rik | DNA damage-induced apoptosis suppressor                     | Mm.26468.2                   | 3.0                        | 3.6                       | <b>1.6</b>           | 0.009         |
| 1436362_x_at  | 2700079J08Rik | RIKEN cDNA 2700079J08 gene                                  | Mm.220953.2                  | 8.3                        | 8.9                       | <b>1.6</b>           | 0.019         |
| 1437469_at    | Zfp750        | zinc finger protein 750                                     | Mm.11395.1                   | 7.0                        | 7.6                       | <b>1.6</b>           | 0.007         |
| 1440916_at    | 2510049J12Rik | makorin, ring finger protein 2, opposite strand             | Mm.133694.1                  | 8.5                        | 9.2                       | <b>1.6</b>           | 0.003         |
| 1460677_at    | Spats2        | spermatogenesis associated, serine-rich 2                   | Mm.21619.1                   | 7.7                        | 8.4                       | <b>1.6</b>           | 0.018         |
| 1416299_at    | Shcbp1        | Shc SH2-domain binding protein 1                            | Mm.37801.1                   | 4.0                        | 4.6                       | <b>1.6</b>           | 0.046         |
| 1423905_at    | Pvr           | poliovirus receptor                                         | Mm.134436.1                  | 5.5                        | 6.2                       | <b>1.6</b>           | 0.030         |
| 1424030_at    | Grhl1         | grainyhead-like 1 (Drosophila)                              | Mm.25552.1                   | 5.0                        | 5.7                       | <b>1.6</b>           | 0.048         |
| 1428260_at    | Atl1          | atlastin GTPase 1                                           | Mm.26381.1                   | 4.4                        | 5.1                       | <b>1.6</b>           | 0.042         |
| 1433857_at    | Fat1          | FAT tumor suppressor homolog 1 (Drosophila)                 | Mm.27365.1                   | 9.8                        | 10.4                      | <b>1.6</b>           | 0.009         |
| 1440139_at    |               |                                                             | Mm.174301.1                  | 3.4                        | 4.1                       | <b>1.6</b>           | 0.002         |
| 1444728_at    |               |                                                             | Mm.207868.1                  | 5.5                        | 6.2                       | <b>1.6</b>           | 0.021         |
| 1451928_a_at  | Rad18         | RAD18 homolog (S. cerevisiae)                               | Mm.103812.2                  | 4.7                        | 5.4                       | <b>1.6</b>           | 0.011         |
| 1415828_a_at  | Serp1         | stress-associated endoplasmic reticulum protein 1           | Mm.29702.1                   | 11.7                       | 12.3                      | <b>1.6</b>           | 0.002         |
| 1416665_at    | Coq7          | demethyl-Q 7                                                | Mm.20634.1                   | 8.8                        | 9.5                       | <b>1.6</b>           | 0.014         |
| 1417818_at    | Wwtr1         | WW domain containing transcription regulator 1              | Mm.28060.1                   | 8.0                        | 8.7                       | <b>1.6</b>           | 0.018         |
| 1426208_x_at  | Plagl1        | pleiomorphic adenoma gene-like 1                            | Mm.220978.3                  | 6.7                        | 7.3                       | <b>1.6</b>           | 0.021         |

**Supplemental Table 8. Significant differently expressed genes in 1KI HCC samples**

| Affymetrix ID | Gene Symbol    | Description                                                                                                                                                                                                                                                                                                          | Transcript ID (Array Design) | 3aKO avg signal log2 (n=5) | 1KI Avg Signal log2 (n=5) | Fold Change (linear) | ANOVA p-value |
|---------------|----------------|----------------------------------------------------------------------------------------------------------------------------------------------------------------------------------------------------------------------------------------------------------------------------------------------------------------------|------------------------------|----------------------------|---------------------------|----------------------|---------------|
| 1431658_at    | Hist1h4a       | histone cluster 1, H4a; histone cluster 1, H4b; histone cluster 1, H4c; histone cluster 1, H4d; histone cluster 1, H4f; histone cluster 1, H4h; histone cluster 1, H4i; histone cluster 1, H4j; histone cluster 1, H4k; histone cluster 1, H4m; histone cluster 1, H4n; histone cluster 2, H4; histone cluster 4, H4 | Mm.53269.1                   | 3.3                        | 3.9                       | <b>1.6</b>           | 0.002         |
| 1432885_at    | 4632432E15 Rik | RIKEN cDNA 4632432E15 gene                                                                                                                                                                                                                                                                                           | Mm.195692.1                  | 4.3                        | 5.0                       | <b>1.6</b>           | 0.043         |
| 1433536_at    | Lrp11          | low density lipoprotein receptor-related protein 11                                                                                                                                                                                                                                                                  | Mm.206759.1                  | 5.8                        | 6.4                       | <b>1.6</b>           | 0.003         |
| 1433770_at    | Dpysl2         | dihydropyrimidinase-like 2                                                                                                                                                                                                                                                                                           | Mm.34656.1                   | 8.6                        | 9.2                       | <b>1.6</b>           | 0.008         |
| 1436660_at    | Rrbp1          | ribosome binding protein 1                                                                                                                                                                                                                                                                                           | Mm.190511.1                  | 6.4                        | 7.1                       | <b>1.6</b>           | 0.011         |
| 1438973_x_at  | Gja1           | gap junction protein, alpha 1                                                                                                                                                                                                                                                                                        | Mm.4504.6                    | 5.0                        | 5.6                       | <b>1.6</b>           | 0.003         |
| 1443086_at    | Alcam          | activated leukocyte cell adhesion molecule                                                                                                                                                                                                                                                                           | Mm.216113.1                  | 7.8                        | 8.4                       | <b>1.6</b>           | 0.016         |
| 1453852_at    | Ddx50          | DEAD (Asp-Glu-Ala-Asp) box polypeptide 50                                                                                                                                                                                                                                                                            | Mm.96287.1                   | 5.6                        | 6.3                       | <b>1.6</b>           | 0.014         |
| 1456927_at    | Mast2          | microtubule associated serine/threonine kinase 2                                                                                                                                                                                                                                                                     | Mm.87251.1                   | 4.1                        | 4.8                       | <b>1.6</b>           | 0.001         |
| 1416222_at    | Nsdhl          | NAD(P) dependent steroid dehydrogenase-like                                                                                                                                                                                                                                                                          | Mm.38792.1                   | 11.4                       | 12.0                      | <b>1.6</b>           | 0.032         |
| 1422006_at    | Eif2ak2        | eukaryotic translation initiation factor 2-alpha kinase 2                                                                                                                                                                                                                                                            | Mm.807.1                     | 6.3                        | 7.0                       | <b>1.6</b>           | 0.002         |
| 1425113_x_at  |                |                                                                                                                                                                                                                                                                                                                      | Mm.172352.1                  | 9.1                        | 9.7                       | <b>1.6</b>           | 0.033         |
| 1434789_at    | Depdc1b        | DEP domain containing 1B                                                                                                                                                                                                                                                                                             | Mm.32318.1                   | 4.9                        | 5.6                       | <b>1.6</b>           | 0.035         |
| 1436038_a_at  | Pigp           | phosphatidylinositol glycan anchor biosynthesis, class P                                                                                                                                                                                                                                                             | Mm.39490.4                   | 8.4                        | 9.1                       | <b>1.6</b>           | 0.027         |
| 1440975_at    | Mxra7          | matrix-remodelling associated 7                                                                                                                                                                                                                                                                                      | Mm.44857.1                   | 5.1                        | 5.8                       | <b>1.6</b>           | 0.012         |
| 1446258_at    | 9530067D14 Rik | Riken cDNA 9530067D14 gene                                                                                                                                                                                                                                                                                           | Mm.215385.1                  | 6.7                        | 7.3                       | <b>1.6</b>           | 0.004         |
| 1446720_at    |                |                                                                                                                                                                                                                                                                                                                      | Mm.182621.1                  | 6.0                        | 6.6                       | <b>1.6</b>           | 0.021         |
| 1448627_s_at  | Pbk            | PDZ binding kinase                                                                                                                                                                                                                                                                                                   | Mm.24337.1                   | 4.6                        | 5.3                       | <b>1.6</b>           | 0.014         |
| 1450247_a_at  | Scamp5         | secretory carrier membrane protein 5                                                                                                                                                                                                                                                                                 | Mm.102278.1                  | 7.0                        | 7.6                       | <b>1.6</b>           | 0.007         |
| 1453714_a_at  | Shroom3        | shroom family member 3                                                                                                                                                                                                                                                                                               | Mm.46014.3                   | 5.4                        | 6.1                       | <b>1.6</b>           | 0.034         |
| 1455390_at    | Alkbh6         | alkB, alkylation repair homolog 6 (E. coli)                                                                                                                                                                                                                                                                          | Mm.40726.1                   | 7.6                        | 8.2                       | <b>1.6</b>           | 0.012         |
| 1416554_at    | Pdlim1         | PDZ and LIM domain 1 (elfin)                                                                                                                                                                                                                                                                                         | Mm.5567.1                    | 10.1                       | 10.7                      | <b>1.5</b>           | 0.003         |
| 1430623_s_at  | Nabp1          | nucleic acid binding protein 1                                                                                                                                                                                                                                                                                       | Mm.219618.1                  | 7.6                        | 8.2                       | <b>1.5</b>           | 0.018         |
| 1439433_a_at  | Slc35a2        | solute carrier family 35 (UDP-galactose transporter), member A2                                                                                                                                                                                                                                                      | Mm.214976.5                  | 6.1                        | 6.7                       | <b>1.5</b>           | 0.020         |
| 1441372_at    | 5930405F01 Rik | RIKEN cDNA 5930405F01 gene                                                                                                                                                                                                                                                                                           | Mm.207507.1                  | 4.5                        | 5.1                       | <b>1.5</b>           | 0.000         |
| 1441797_at    |                |                                                                                                                                                                                                                                                                                                                      | Mm.215957.1                  | 5.0                        | 5.6                       | <b>1.5</b>           | 0.019         |
| 1441910_x_at  | Ccne1          | cyclin E1                                                                                                                                                                                                                                                                                                            | Mm.128432.1                  | 6.5                        | 7.1                       | <b>1.5</b>           | 0.003         |



**Supplemental Table 8. Significant differently expressed genes in 1KI HCC samples**

| Affymetrix ID | Gene Symbol    | Description                                                                        | Transcript ID (Array Design) | 3aKO avg signal log2 (n=5) | 1KI Avg Signal log2 (n=5) | Fold Change (linear) | ANOVA p-value |
|---------------|----------------|------------------------------------------------------------------------------------|------------------------------|----------------------------|---------------------------|----------------------|---------------|
| 1449187_at    | Pdgfa          | platelet derived growth factor, alpha                                              | Mm.2675.1                    | 6.9                        | 7.6                       | 1.5                  | 0.009         |
| 1451526_at    | Arhgap12       | Rho GTPase activating protein 12                                                   | Mm.22834.1                   | 6.2                        | 6.8                       | 1.5                  | 0.023         |
| 1455548_at    | Dlgap4         | discs, large homolog-associated protein 4 (Drosophila)                             | Mm.41192.1                   | 6.5                        | 7.1                       | 1.5                  | 0.012         |
| 1455987_at    | Sec61a1        | Sec61 alpha 1 subunit (S. cerevisiae)                                              | Mm.28375.3                   | 6.4                        | 7.0                       | 1.5                  | 0.024         |
| 1416837_at    | Bax            | BCL2-associated X protein                                                          | Mm.19904.1                   | 8.5                        | 9.2                       | 1.5                  | 0.002         |
| 1420768_a_at  | Dhx58          | DEXH (Asp-Glu-X-His) box polypeptide 58                                            | Mm.170797.1                  | 4.3                        | 4.9                       | 1.5                  | 0.001         |
| 1422779_at    | Smpd3          | sphingomyelin phosphodiesterase 3, neutral                                         | Mm.143806.1                  | 4.4                        | 5.1                       | 1.5                  | 0.043         |
| 1434975_x_at  | Pisd-ps3       | phosphatidylserine decarboxylase, pseudogene 3                                     | Mm.30245.2                   | 9.7                        | 10.3                      | 1.5                  | 0.019         |
| 1438668_x_at  | Atxn2l         | ataxin 2-like                                                                      | Mm.22653.1                   | 8.0                        | 8.6                       | 1.5                  | 0.027         |
| 1439093_at    | Hspa4l         | heat shock protein 4 like                                                          | Mm.155691.1                  | 6.5                        | 7.1                       | 1.5                  | 0.015         |
| 1449110_at    | Rhob           | ras homolog gene family, member B                                                  | Mm.687.1                     | 9.6                        | 10.2                      | 1.5                  | 0.003         |
| 1449117_at    | Jund           | jun D proto-oncogene                                                               | Mm.1175.1                    | 9.3                        | 9.9                       | 1.5                  | 0.002         |
| 1451310_a_at  | Ctsl           | cathepsin L                                                                        | Mm.930.2                     | 12.2                       | 12.8                      | 1.5                  | 0.009         |
| 1419493_a_at  | Tpd52          | tumor protein D52                                                                  | Mm.2777.1                    | 8.4                        | 9.0                       | 1.5                  | 0.036         |
| 1420704_at    | Csf2ra         | colony stimulating factor 2 receptor, alpha, low-affinity (granulocyte-macrophage) | Mm.156264.1                  | 4.7                        | 5.3                       | 1.5                  | 0.022         |
| 1423648_at    | Pdia6          | protein disulfide isomerase associated 6                                           | Mm.182959.1                  | 11.2                       | 11.8                      | 1.5                  | 0.009         |
| 1426376_at    | Reep5          | receptor accessory protein 5                                                       | Mm.21251.2                   | 7.1                        | 7.7                       | 1.5                  | 0.019         |
| 1428228_at    | Pgm3           | phosphoglucomutase 3                                                               | Mm.20245.1                   | 7.4                        | 8.0                       | 1.5                  | 0.031         |
| 1434564_at    | E2f3           | E2F transcription factor 3                                                         | Mm.86324.1                   | 6.8                        | 7.4                       | 1.5                  | 0.001         |
| 1436473_at    | Zfp248         | zinc finger protein 248                                                            | Mm.68415.1                   | 2.6                        | 3.2                       | 1.5                  | 0.016         |
| 1449334_at    | Timp3          | tissue inhibitor of metalloproteinase 3                                            | Mm.4871.1                    | 7.3                        | 7.9                       | 1.5                  | 0.002         |
| 1450677_at    | Chek1          | checkpoint kinase 1                                                                | Mm.16753.1                   | 3.3                        | 3.9                       | 1.5                  | 0.029         |
| 1452214_at    | Skil           | SKI-like                                                                           | Mm.23176.1                   | 8.5                        | 9.1                       | 1.5                  | 0.019         |
| 1452217_at    | Ahnak          | AHNAK nucleoprotein (desmoyokin)                                                   | Mm.203866.1                  | 6.9                        | 7.5                       | 1.5                  | 0.003         |
| 1453434_at    | 1110019D14 Rik | RIKEN cDNA 1110019D14 gene                                                         | Mm.54132.1                   | 3.9                        | 4.5                       | 1.5                  | 0.003         |
| 1456693_at    | Gm20213        | predicted gene, 20213                                                              | Mm.54297.1                   | 3.4                        | 4.0                       | 1.5                  | 0.043         |
| 1456733_x_at  | Serpinh1       | serine (or cysteine) peptidase inhibitor, clade H, member 1                        | Mm.22708.4                   | 6.6                        | 7.2                       | 1.5                  | 0.010         |
| 1460121_at    | 9630010G10 Rik | RIKEN cDNA 9630010G10 gene                                                         | Mm.89324.1                   | 5.4                        | 6.0                       | 1.5                  | 0.010         |
| 1460698_a_at  | Sec11c         | SEC11 homolog C (S. cerevisiae)                                                    | Mm.27800.1                   | 9.1                        | 9.7                       | 1.5                  | 0.013         |
| 1416199_at    | Kifc3          | kinesin family member C3                                                           | Mm.22513.1                   | 7.7                        | 8.3                       | 1.5                  | 0.019         |
| 1418591_at    | Dnaja4         | DnaJ (Hsp40) homolog, subfamily A, member 4                                        | Mm.52319.1                   | 6.6                        | 7.1                       | 1.5                  | 0.026         |
| 1423721_at    | Tpm1           | tropomyosin 1, alpha                                                               | Mm.121878.2                  | 8.7                        | 9.3                       | 1.5                  | 0.034         |
| 1423804_a_at  | Idi1           | isopentenyl-diphosphate delta isomerase                                            | Mm.29847.1                   | 9.2                        | 9.8                       | 1.5                  | 0.037         |
| 1424289_at    | Osgin2         | oxidative stress induced growth inhibitor family member 2                          | Mm.46455.1                   | 5.5                        | 6.1                       | 1.5                  | 0.043         |

**Supplemental Table 8. Significant differently expressed genes in 1KI HCC samples**

| Affymetrix ID | Gene Symbol    | Description                                                                                                                            | Transcript ID (Array Design) | 3aKO avg signal log2 (n=5) | 1KI Avg Signal log2 (n=5) | Fold Change (linear) | ANOVA p-value |
|---------------|----------------|----------------------------------------------------------------------------------------------------------------------------------------|------------------------------|----------------------------|---------------------------|----------------------|---------------|
| 1427869_at    | Ighm           | immunoglobulin heavy constant mu                                                                                                       | Mm.196085.1                  | 4.3                        | 4.9                       | 1.5                  | 0.049         |
| 1439041_at    | Slc39a10       | solute carrier family 39 (zinc transporter), member 10                                                                                 | Mm.215090.1                  | 5.2                        | 5.8                       | 1.5                  | 0.021         |
| 1442368_at    | Kctd12b        | potassium channel tetramerisation domain containing 12b                                                                                | Mm.211646.1                  | 3.5                        | 4.1                       | 1.5                  | 0.044         |
| 1445606_a_at  | 2900009J06 Rik | RIKEN cDNA 2900009J06 gene                                                                                                             | Mm.25735.1                   | 5.8                        | 6.4                       | 1.5                  | 0.037         |
| 1447640_s_at  | Pbx3           | pre B cell leukemia homeobox 3                                                                                                         | Mm.137604.1                  | 5.4                        | 6.0                       | 1.5                  | 0.026         |
| 1451431_a_at  | Dbndd2         | dysbindin (dystrobrevin binding protein 1) domain containing 2                                                                         | Mm.195525.1                  | 8.4                        | 9.0                       | 1.5                  | 0.043         |
| 1417184_s_at  | Hbb-b1         | hemoglobin, beta adult major chain; hemoglobin, beta adult minor chain; hemoglobin, beta adult s chain; hemoglobin, beta adult t chain | Mm.206691.1                  | 14.1                       | 13.5                      | -1.5                 | 0.040         |
| 1417898_a_at  | Gzma           | granzyme A                                                                                                                             | Mm.15510.1                   | 6.5                        | 5.9                       | -1.5                 | 0.016         |
| 1425057_at    | Pbld1          | phenazine biosynthesis-like protein domain containing 1                                                                                | Mm.104960.1                  | 11.4                       | 10.9                      | -1.5                 | 0.016         |
| 1425597_a_at  | Qk             | quaking                                                                                                                                | Mm.2655.3                    | 5.8                        | 5.2                       | -1.5                 | 0.001         |
| 1425851_a_at  | Amigo1         | adhesion molecule with Ig like domain 1                                                                                                | Mm.153435.1                  | 6.6                        | 6.0                       | -1.5                 | 0.005         |
| 1438349_at    | Zfp229         | zinc finger protein 229                                                                                                                | Mm.28736.1                   | 5.0                        | 4.4                       | -1.5                 | 0.009         |
| 1448825_at    | Pdk2           | pyruvate dehydrogenase kinase, isoenzyme 2                                                                                             | Mm.29768.1                   | 9.8                        | 9.2                       | -1.5                 | 0.016         |
| 1449579_at    | Sh3yl1         | Sh3 domain YSC-like 1                                                                                                                  | Mm.218624.1                  | 8.5                        | 7.9                       | -1.5                 | 0.032         |
| 1455506_at    | Slc25a34       | solute carrier family 25, member 34                                                                                                    | Mm.101716.1                  | 7.2                        | 6.6                       | -1.5                 | 0.011         |
| 1421825_at    | Bace1          | beta-site APP cleaving enzyme 1                                                                                                        | Mm.24044.1                   | 6.8                        | 6.2                       | -1.5                 | 0.018         |
| 1426876_at    | Pm20d1         | peptidase M20 domain containing 1                                                                                                      | Mm.23844.1                   | 11.3                       | 10.7                      | -1.5                 | 0.042         |
| 1428926_at    | Fbxo31         | F-box protein 31                                                                                                                       | Mm.41330.1                   | 8.6                        | 8.0                       | -1.5                 | 0.005         |
| 1432509_at    | 5033430I15Rik  | RIKEN cDNA 5033430I15 gene                                                                                                             | Mm.44949.1                   | 5.4                        | 4.8                       | -1.5                 | 0.030         |
| 1436332_at    | Hspb6          | heat shock protein, alpha-crystallin-related, B6                                                                                       | Mm.34885.1                   | 8.2                        | 7.6                       | -1.5                 | 0.026         |
| 1437590_at    | Pyroxd2        | pyridine nucleotide-disulphide oxidoreductase domain 2                                                                                 | Mm.212966.1                  | 7.8                        | 7.2                       | -1.5                 | 0.010         |
| 1447750_x_at  | Pih1d1         | PIH1 domain containing 1                                                                                                               | Mm.82139.1                   | 8.1                        | 7.5                       | -1.5                 | 0.002         |
| 1448938_at    | Rpa3           | replication protein A3                                                                                                                 | Mm.29073.1                   | 8.3                        | 7.7                       | -1.5                 | 0.013         |
| 1451543_at    | Fbxo21         | F-box protein 21                                                                                                                       | Mm.216305.1                  | 8.5                        | 7.9                       | -1.5                 | 0.037         |
| 1418996_a_at  | Lym5           | LYR motif containing 5                                                                                                                 | Mm.46847.1                   | 11.1                       | 10.5                      | -1.5                 | 0.011         |
| 1426850_a_at  | Map2k6         | mitogen-activated protein kinase kinase 6                                                                                              | Mm.14487.2                   | 7.7                        | 7.1                       | -1.5                 | 0.044         |
| 1428562_at    | Mir22hg        | Mir22 host gene (non-protein coding)                                                                                                   | Mm.41393.1                   | 8.9                        | 8.2                       | -1.5                 | 0.010         |
| 1431011_at    | Dlst           | dihydrolipoamide S-succinyltransferase (E2 component of 2-oxo-glutarate complex)                                                       | Mm.28365.2                   | 8.2                        | 7.5                       | -1.5                 | 0.003         |
| 1436109_at    | AI317395       | expressed sequence AI317395                                                                                                            | Mm.220844.1                  | 9.7                        | 9.1                       | -1.5                 | 0.045         |

**Supplemental Table 8. Significant differently expressed genes in 1KI HCC samples**

| Affymetrix ID | Gene Symbol    | Description                                                                   | Transcript ID (Array Design) | 3aKO avg signal log2 (n=5) | 1KI Avg Signal log2 (n=5) | Fold Change (linear) | ANOVA p-value |
|---------------|----------------|-------------------------------------------------------------------------------|------------------------------|----------------------------|---------------------------|----------------------|---------------|
| 1437473_at    | Maf            | avian musculoaponeurotic fibrosarcoma (v-maf) AS42 oncogene homolog           | Mm.18453.1                   | 7.9                        | 7.3                       | -1.5                 | 0.046         |
| 1444143_at    |                |                                                                               | Mm.117589.1                  | 5.8                        | 5.2                       | -1.5                 | 0.006         |
| 1446861_at    | Gns            | glucosamine (N-acetyl)-6-sulfatase                                            | Mm.209847.1                  | 7.2                        | 6.6                       | -1.5                 | 0.001         |
| 1449186_at    | Bag4           | BCL2-associated athanogene 4                                                  | Mm.27102.1                   | 8.8                        | 8.2                       | -1.5                 | 0.043         |
| 1458295_at    | BC038331       | cDNA sequence BC038331                                                        | Mm.78325.1                   | 6.6                        | 6.0                       | -1.5                 | 0.002         |
| 1460216_at    | Acads          | acyl-Coenzyme A dehydrogenase, short chain                                    | Mm.18759.1                   | 11.1                       | 10.5                      | -1.5                 | 0.006         |
| 1416631_at    | Ap4b1          | adaptor-related protein complex AP-4, beta 1                                  | Mm.29234.1                   | 7.8                        | 7.2                       | -1.5                 | 0.007         |
| 1424399_at    | Uck1           | uridine-cytidine kinase 1                                                     | Mm.2559.1                    | 9.4                        | 8.8                       | -1.5                 | 0.042         |
| 1434742_s_at  | Aifm3          | apoptosis-inducing factor, mitochondrion-associated 3                         | Mm.40038.2                   | 7.0                        | 6.4                       | -1.5                 | 0.027         |
| 1439831_at    |                | predicted gene 4951                                                           | Mm.100018.1                  | 10.8                       | 10.2                      | -1.5                 | 0.003         |
| 1448930_at    | 3010026O09 Rik | RIKEN cDNA 3010026O09 gene                                                    | Mm.41784.1                   | 6.9                        | 6.3                       | -1.5                 | 0.003         |
| 1449443_at    | Decr1          | 2,4-dienoyl CoA reductase 1, mitochondrial                                    | Mm.24395.1                   | 9.5                        | 8.9                       | -1.5                 | 0.033         |
| 1451627_a_at  | Slc1a2         | solute carrier family 1 (glial high affinity glutamate transporter), member 2 | Mm.2861.2                    | 9.3                        | 8.7                       | -1.5                 | 0.039         |
| 1452416_at    | Il6ra          | interleukin 6 receptor, alpha                                                 | Mm.2856.2                    | 9.3                        | 8.7                       | -1.5                 | 0.020         |
| 1453961_a_at  | Mospd3         | motile sperm domain containing 3                                              | Mm.41355.2                   | 7.4                        | 6.8                       | -1.5                 | 0.037         |
| 1457279_at    | Gm17586        | predicted gene, 17586                                                         | Mm.139237.1                  | 6.5                        | 5.9                       | -1.5                 | 0.003         |
| 1458395_at    | B930054O08     | uncharacterized protein B930054O08                                            | Mm.33144.1                   | 7.6                        | 7.0                       | -1.5                 | 0.020         |
| 1416772_at    | Cpt2           | carnitine palmitoyltransferase 2                                              | Mm.29499.1                   | 11.7                       | 11.0                      | -1.6                 | 0.027         |
| 1423871_at    | Tmem63a        | transmembrane protein 63a                                                     | Mm.185518.1                  | 8.6                        | 8.0                       | -1.6                 | 0.009         |
| 1427082_at    | Sdr42e1        | short chain dehydrogenase/reductase family 42E, member 1                      | Mm.23630.1                   | 11.5                       | 10.9                      | -1.6                 | 0.048         |
| 1427100_at    | Metrn          | meteorin, glial cell differentiation regulator                                | Mm.41925.1                   | 7.6                        | 7.0                       | -1.6                 | 0.022         |
| 1427957_at    | Adtrp          | androgen dependent TFPI regulating protein                                    | Mm.25195.1                   | 11.7                       | 11.1                      | -1.6                 | 0.045         |
| 1428290_at    | Mipep          | mitochondrial intermediate peptidase                                          | Mm.38407.1                   | 9.6                        | 9.0                       | -1.6                 | 0.023         |
| 1433705_at    | Zfp213         | zinc finger protein 213                                                       | Mm.6929.1                    | 7.3                        | 6.7                       | -1.6                 | 0.029         |
| 1436187_at    | 1110054M08 Rik | RIKEN cDNA 1110054M08 gene                                                    | Mm.205997.1                  | 9.2                        | 8.6                       | -1.6                 | 0.014         |
| 1441033_at    | Tmtc2          | transmembrane and tetratricopeptide repeat containing 2                       | Mm.25225.1                   | 5.6                        | 4.9                       | -1.6                 | 0.024         |
| 1441342_at    | Dpp4           | dipeptidylpeptidase 4                                                         | Mm.189904.1                  | 7.9                        | 7.2                       | -1.6                 | 0.028         |
| 1444178_at    | Gm9895         | predicted gene 9895                                                           | Mm.103412.1                  | 6.8                        | 6.2                       | -1.6                 | 0.000         |
| 1444531_at    |                |                                                                               | Mm.40499.1                   | 7.3                        | 6.6                       | -1.6                 | 0.008         |
| 1447811_s_at  | Amigo1         | adhesion molecule with Ig like domain 1                                       | Mm.44915.2                   | 6.4                        | 5.8                       | -1.6                 | 0.005         |

**Supplemental Table 8. Significant differently expressed genes in 1KI HCC samples**

| Affymetrix ID | Gene Symbol | Description                                                            | Transcript ID (Array Design) | 3aKO avg signal log2 (n=5) | 1KI Avg Signal log2 (n=5) | Fold Change (linear) | ANOVA p-value |
|---------------|-------------|------------------------------------------------------------------------|------------------------------|----------------------------|---------------------------|----------------------|---------------|
| 1450816_at    | Polg2       | polymerase (DNA directed), gamma 2, accessory subunit                  | Mm.859.1                     | 8.4                        | 7.8                       | -1.6                 | 0.003         |
| 1460659_at    |             |                                                                        | Mm.200447.2                  | 6.7                        | 6.1                       | -1.6                 | 0.003         |
| 1419747_at    | Asgr2       | asialoglycoprotein receptor 2                                          | Mm.1357.1                    | 10.1                       | 9.4                       | -1.6                 | 0.003         |
| 1434065_at    | Cwf19l1     | CWF19-like 1, cell cycle control (S. pombe)                            | Mm.36543.1                   | 9.3                        | 8.6                       | -1.6                 | 0.007         |
| 1441765_at    |             | pantothenate kinase 1                                                  | Mm.209969.1                  | 8.4                        | 7.8                       | -1.6                 | 0.025         |
| 1444805_at    |             |                                                                        | Mm.182876.1                  | 4.3                        | 3.6                       | -1.6                 | 0.005         |
| 1457991_at    |             |                                                                        | Mm.161241.1                  | 6.3                        | 5.6                       | -1.6                 | 0.026         |
| 1460159_at    | Mysm1       | myb-like, SWIRM and MPN domains 1                                      | Mm.208868.1                  | 5.1                        | 4.4                       | -1.6                 | 0.003         |
| 1418238_at    | Ivd         | isovaleryl coenzyme A dehydrogenase                                    | Mm.6635.1                    | 11.1                       | 10.4                      | -1.6                 | 0.022         |
| 1420549_at    | Gbp2b       | guanylate binding protein 2b                                           | Mm.250.1                     | 6.5                        | 5.9                       | -1.6                 | 0.033         |
| 1441926_x_at  | Tmie        | transmembrane inner ear                                                | Mm.153982.1                  | 6.8                        | 6.2                       | -1.6                 | 0.019         |
| 1446742_at    |             |                                                                        | Mm.209315.1                  | 4.2                        | 3.6                       | -1.6                 | 0.047         |
| 1451405_at    | Pcca        | propionyl-Coenzyme A carboxylase, alpha polypeptide                    | Mm.23876.1                   | 11.3                       | 10.6                      | -1.6                 | 0.030         |
| 1451782_a_at  | Slc29a1     | solute carrier family 29 (nucleoside transporters), member 1           | Mm.29744.3                   | 11.2                       | 10.6                      | -1.6                 | 0.049         |
| 1455502_at    | Madd        | MAP-kinase activating death domain                                     | Mm.36410.1                   | 8.4                        | 7.7                       | -1.6                 | 0.021         |
| 1415944_at    | Sdc1        | syndecan 1                                                             | Mm.2580.1                    | 10.6                       | 9.9                       | -1.6                 | 0.043         |
| 1416739_a_at  | Brap        | BRCA1 associated protein                                               | Mm.153372.1                  | 8.4                        | 7.7                       | -1.6                 | 0.023         |
| 1425033_at    | Slc17a2     | solute carrier family 17 (sodium phosphate), member 2                  | Mm.24030.1                   | 11.8                       | 11.1                      | -1.6                 | 0.035         |
| 1438327_at    | Zfp385b     | zinc finger protein 385B                                               | Mm.87653.2                   | 6.3                        | 5.6                       | -1.6                 | 0.032         |
| 1438689_at    | Zfp784      | zinc finger protein 784                                                | Mm.45078.2                   | 6.8                        | 6.1                       | -1.6                 | 0.019         |
| 1439144_at    | Cwf19l1     | CWF19-like 1, cell cycle control (S. pombe)                            | Mm.93826.1                   | 7.4                        | 6.7                       | -1.6                 | 0.009         |
| 1440845_at    | Tmem243     | uncharacterized LOC102633802; transmembrane protein 243, mitochondrial | Mm.216118.2                  | 4.9                        | 4.2                       | -1.6                 | 0.005         |
| 1442436_at    | Fn3k        | fructosamine 3 kinase                                                  | Mm.38358.1                   | 5.7                        | 5.0                       | -1.6                 | 0.009         |
| 1444195_at    |             |                                                                        | Mm.37916.1                   | 7.1                        | 6.4                       | -1.6                 | 0.010         |
| 1450725_s_at  | Car14       | carbonic anhydrase 14                                                  | Mm.34556.1                   | 9.8                        | 9.1                       | -1.6                 | 0.030         |
| 1453586_at    | Entpd1      | ectonucleoside triphosphate diphosphohydrolase 1                       | Mm.45585.1                   | 5.8                        | 5.1                       | -1.6                 | 0.037         |
| 1425362_at    | Agfg2       | ArfGAP with FG repeats 2                                               | Mm.35097.1                   | 7.6                        | 7.0                       | -1.6                 | 0.016         |
| 1438082_at    | Tmem206     | transmembrane protein 206                                              | Mm.205569.2                  | 6.7                        | 6.0                       | -1.6                 | 0.026         |
| 1438313_at    |             |                                                                        | Mm.124117.1                  | 4.2                        | 3.5                       | -1.6                 | 0.014         |
| 1439821_at    | Lrp2bp      | Lrp2 binding protein                                                   | Mm.115430.1                  | 5.6                        | 4.9                       | -1.6                 | 0.012         |
| 1442258_at    | Lonp2       | lon peptidase 2, peroxisomal                                           | Mm.178192.1                  | 8.2                        | 7.5                       | -1.6                 | 0.044         |
| 1423488_at    | Mmd         | monocyte to macrophage differentiation-associated                      | Mm.38791.1                   | 12.0                       | 11.3                      | -1.6                 | 0.035         |
| 1425088_at    | Scnn1a      | sodium channel, nonvoltage-gated 1 alpha                               | Mm.144114.1                  | 8.4                        | 7.7                       | -1.6                 | 0.024         |

**Supplemental Table 8. Significant differently expressed genes in 1KI HCC samples**

| Affymetrix ID | Gene Symbol    | Description                                                             | Transcript ID (Array Design) | 3aKO avg signal log2 (n=5) | 1KI Avg Signal log2 (n=5) | Fold Change (linear) | ANOVA p-value |
|---------------|----------------|-------------------------------------------------------------------------|------------------------------|----------------------------|---------------------------|----------------------|---------------|
| 1431189_a_at  | Fahd2a         | fumarylacetoacetate hydrolase domain containing 2A                      | Mm.180782.2                  | 7.6                        | 6.9                       | -1.6                 | 0.018         |
| 1449534_at    | Sycp3          | synaptonemal complex protein 3                                          | Mm.148209.1                  | 4.0                        | 3.3                       | -1.6                 | 0.023         |
| 1460373_a_at  | Setd4          | SET domain containing 4                                                 | Mm.981.1                     | 7.6                        | 6.9                       | -1.6                 | 0.024         |
| 1416187_s_at  | Pnrc2          | proline-rich nuclear receptor coactivator 2                             | Mm.29159.1                   | 7.7                        | 7.0                       | -1.6                 | 0.009         |
| 1416987_at    | Elp4           | elongation protein 4 homolog (S. cerevisiae)                            | Mm.33870.1                   | 5.5                        | 4.8                       | -1.6                 | 0.015         |
| 1418311_at    | Fn3k           | fructosamine 3 kinase                                                   | Mm.32787.1                   | 7.9                        | 7.2                       | -1.6                 | 0.030         |
| 1439175_at    |                |                                                                         | Mm.184021.1                  | 6.9                        | 6.3                       | -1.6                 | 0.022         |
| 1444622_at    |                |                                                                         | Mm.202462.1                  | 5.8                        | 5.2                       | -1.6                 | 0.039         |
| 1447372_at    | Aldh16a1       | aldehyde dehydrogenase 16 family, member A1                             | Mm.212548.1                  | 8.7                        | 8.0                       | -1.6                 | 0.018         |
| 1447380_at    | Amdhd1         | amidohydrolase domain containing 1                                      | Mm.214299.1                  | 8.1                        | 7.4                       | -1.6                 | 0.005         |
| 1448756_at    | S100a9         | S100 calcium binding protein A9 (calgranulin B)                         | Mm.2128.1                    | 7.1                        | 6.4                       | -1.6                 | 0.012         |
| 1419687_at    | MacroD1        | MACRO domain containing 1                                               | Mm.38346.1                   | 10.1                       | 9.4                       | -1.6                 | 0.021         |
| 1428978_at    | 2900009J20 Rik |                                                                         | Mm.82240.1                   | 6.6                        | 5.9                       | -1.6                 | 0.004         |
| 1429692_s_at  | Gch1           | GTP cyclohydrolase 1                                                    | Mm.41683.2                   | 9.8                        | 9.1                       | -1.6                 | 0.023         |
| 1432492_a_at  | HaaO           | 3-hydroxyanthranilate 3,4-dioxygenase                                   | Mm.30100.2                   | 12.9                       | 12.2                      | -1.6                 | 0.019         |
| 1441878_s_at  | Oxld1          | oxidoreductase like domain containing 1                                 | Mm.136392.1                  | 8.6                        | 7.9                       | -1.6                 | 0.002         |
| 1451523_a_at  | Mif4gd         | MIF4G domain containing                                                 | Mm.24635.1                   | 9.2                        | 8.5                       | -1.6                 | 0.033         |
| 1457363_at    | Gm17753        | predicted gene, 17753                                                   | Mm.211685.1                  | 8.4                        | 7.7                       | -1.6                 | 0.030         |
| 1457883_at    | Pm20d2         | peptidase M20 domain containing 2                                       | Mm.212481.1                  | 5.8                        | 5.1                       | -1.6                 | 0.018         |
| 1460336_at    | Ppargc1a       | peroxisome proliferative activated receptor, gamma, coactivator 1 alpha | Mm.10707.1                   | 7.4                        | 6.7                       | -1.6                 | 0.043         |
| 1419997_at    |                |                                                                         | Mm.195273.1                  | 6.1                        | 5.4                       | -1.6                 | 0.046         |
| 1417639_at    | Slc22a4        | solute carrier family 22 (organic cation transporter), member 4         | Mm.42185.1                   | 5.0                        | 4.3                       | -1.6                 | 0.003         |
| 1422526_at    | Acsl1          | acyl-CoA synthetase long-chain family member 1                          | Mm.28962.1                   | 12.1                       | 11.4                      | -1.6                 | 0.042         |
| 1424029_at    | Tspyl4         | TSPY-like 4                                                             | Mm.21485.1                   | 7.0                        | 6.3                       | -1.6                 | 0.048         |
| 1434293_at    | Hectd3         | HECT domain containing 3                                                | Mm.220986.1                  | 7.5                        | 6.8                       | -1.6                 | 0.002         |
| 1425177_at    | Shmt1          | serine hydroxymethyltransferase 1 (soluble)                             | Mm.3379.2                    | 11.5                       | 10.8                      | -1.7                 | 0.040         |
| 1427370_at    | Amdhd1         | amidohydrolase domain containing 1                                      | Mm.80810.1                   | 10.8                       | 10.1                      | -1.7                 | 0.003         |
| 1435551_at    | Fhod3          | formin homology 2 domain containing 3                                   | Mm.28387.1                   | 5.0                        | 4.3                       | -1.7                 | 0.007         |
| 1449310_at    | Ptger2         | prostaglandin E receptor 2 (subtype EP2)                                | Mm.4630.1                    | 4.5                        | 3.8                       | -1.7                 | 0.028         |
| 1451512_s_at  | Hibch          | 3-hydroxyisobutyryl-Coenzyme A hydrolase                                | Mm.25250.1                   | 10.2                       | 9.5                       | -1.7                 | 0.022         |
| 1438775_at    |                |                                                                         | Mm.32269.1                   | 5.3                        | 4.6                       | -1.7                 | 0.010         |
| 1441285_at    | Pdp2           |                                                                         | Mm.151162.1                  | 8.3                        | 7.6                       | -1.7                 | 0.006         |

**Supplemental Table 8. Significant differently expressed genes in 1KI HCC samples**

| Affymetrix ID | Gene Symbol    | Description                                                                           | Transcript ID (Array Design) | 3aKO avg signal log2 (n=5) | 1KI Avg Signal log2 (n=5) | Fold Change (linear) | ANOVA p-value |
|---------------|----------------|---------------------------------------------------------------------------------------|------------------------------|----------------------------|---------------------------|----------------------|---------------|
| 1452005_at    | Dlat           | dihydrolipoamide S-acetyltransferase (E2 component of pyruvate dehydrogenase complex) | Mm.38786.1                   | 7.4                        | 6.6                       | -1.7                 | 0.009         |
| 1455095_at    | Hist2h2be      | histone cluster 2, H2be                                                               | Mm.5220.1                    | 5.5                        | 4.8                       | -1.7                 | 0.002         |
| 1427974_s_at  | Cacna1d        | calcium channel, voltage-dependent, L type, alpha 1D subunit                          | Mm.9772.1                    | 6.2                        | 5.5                       | -1.7                 | 0.005         |
| 1431381_at    | 3110005L24 Rik | RIKEN cDNA 3110005L24 gene                                                            | Mm.158940.1                  | 5.7                        | 5.0                       | -1.7                 | 0.013         |
| 1441242_at    |                |                                                                                       | Mm.133119.1                  | 7.0                        | 6.3                       | -1.7                 | 0.048         |
| 1449403_at    | Pde9a          | phosphodiesterase 9A                                                                  | Mm.10812.1                   | 8.2                        | 7.4                       | -1.7                 | 0.027         |
| 1457110_at    | Pank1          | pantothenate kinase 1                                                                 | Mm.129337.1                  | 7.0                        | 6.2                       | -1.7                 | 0.002         |
| 1460061_at    |                |                                                                                       | Mm.74137.1                   | 6.0                        | 5.2                       | -1.7                 | 0.016         |
| 1417212_at    | Fam195a        | family with sequence similarity 195, member A                                         | Mm.34532.1                   | 10.2                       | 9.4                       | -1.7                 | 0.010         |
| 1435682_at    | Lars2          | leucyl-tRNA synthetase, mitochondrial                                                 | Mm.27719.1                   | 7.7                        | 7.0                       | -1.7                 | 0.002         |
| 1448034_at    | Inca1          | inhibitor of CDK, cyclin A1 interacting protein 1                                     | Mm.2295.1                    | 9.3                        | 8.6                       | -1.7                 | 0.013         |
| 1452828_at    | Fbxo21         | F-box protein 21                                                                      | Mm.21912.1                   | 10.1                       | 9.3                       | -1.7                 | 0.032         |
| 1453081_at    | 2410022M11 Rik | RIKEN cDNA 2410022M11 gene                                                            | Mm.218553.1                  | 8.0                        | 7.3                       | -1.7                 | 0.001         |
| 1416142_at    | Rps6           | ribosomal protein S6                                                                  | Mm.1139.1                    | 8.7                        | 7.9                       | -1.7                 | 0.028         |
| 1417208_at    | Amacr          | alpha-methylacyl-CoA racemase                                                         | Mm.2787.1                    | 11.1                       | 10.4                      | -1.7                 | 0.012         |
| 1436317_at    | Pgap1          | post-GPI attachment to proteins 1                                                     | Mm.103539.1                  | 7.5                        | 6.8                       | -1.7                 | 0.023         |
| 1452914_at    | N4bp2l1        | NEDD4 binding protein 2-like 1                                                        | Mm.220888.1                  | 9.3                        | 8.5                       | -1.7                 | 0.028         |
| 1455792_x_at  | Ndn            | neccdin                                                                               | Mm.7089.3                    | 4.6                        | 3.8                       | -1.7                 | 0.012         |
| 1423731_at    | Aldh16a1       | aldehyde dehydrogenase 16 family, member A1                                           | Mm.200969.1                  | 10.3                       | 9.5                       | -1.7                 | 0.008         |
| 1425343_at    | Hdhd3          | haloacid dehalogenase-like hydrolase domain containing 3                              | Mm.41506.1                   | 9.8                        | 9.0                       | -1.7                 | 0.048         |
| 1427373_at    | Amigo1         | adhesion molecule with Ig like domain 1                                               | Mm.153435.2                  | 6.2                        | 5.5                       | -1.7                 | 0.003         |
| 1443458_at    | D630033O11 Rik | RIKEN cDNA D630033O11 gene                                                            | Mm.135745.1                  | 7.9                        | 7.2                       | -1.7                 | 0.027         |
| 1423554_at    | Ggcx           | gamma-glutamyl carboxylase                                                            | Mm.19937.1                   | 9.6                        | 8.8                       | -1.7                 | 0.032         |
| 1450488_at    | Ccl24          | chemokine (C-C motif) ligand 24                                                       | Mm.31505.1                   | 7.2                        | 6.4                       | -1.7                 | 0.024         |
| 1452757_s_at  | Hba-a1         | hemoglobin alpha, adult chain 1; hemoglobin alpha, adult chain 2                      | Mm.30266.3                   | 13.6                       | 12.8                      | -1.7                 | 0.004         |
| 1426847_at    | Sirt4          | sirtuin 4                                                                             | Mm.104731.1                  | 7.7                        | 7.0                       | -1.7                 | 0.002         |
| 1443056_at    |                |                                                                                       | Mm.167541.1                  | 7.5                        | 6.7                       | -1.7                 | 0.038         |
| 1445235_at    |                |                                                                                       | Mm.120444.1                  | 5.4                        | 4.7                       | -1.7                 | 0.002         |
| 1449817_at    | Abcb11         | ATP-binding cassette, sub-family B (MDR/TAP), member 11                               | Mm.26728.1                   | 12.1                       | 11.3                      | -1.7                 | 0.028         |
| 1460673_at    | Fpgs           | folypolyglutamyl synthetase                                                           | Mm.3830.1                    | 10.8                       | 10.0                      | -1.7                 | 0.017         |
| 1418833_at    | Agxt           | alanine-glyoxylate aminotransferase                                                   | Mm.7457.1                    | 12.4                       | 11.6                      | -1.7                 | 0.020         |
| 1430450_at    | Atp5sl         | ATP5S-like                                                                            | Mm.159956.1                  | 5.0                        | 4.2                       | -1.7                 | 0.016         |

**Supplemental Table 8. Significant differently expressed genes in 1KI HCC samples**

| Affymetrix ID | Gene Symbol    | Description                                                             | Transcript ID (Array Design) | 3aKO avg signal log2 (n=5) | 1KI Avg Signal log2 (n=5) | Fold Change (linear) | ANOVA p-value |
|---------------|----------------|-------------------------------------------------------------------------|------------------------------|----------------------------|---------------------------|----------------------|---------------|
| 1437751_at    | Ppargc1a       | peroxisome proliferative activated receptor, gamma, coactivator 1 alpha | Mm.10707.2                   | 6.5                        | 5.7                       | -1.7                 | 0.016         |
| 1445676_at    |                |                                                                         | Mm.156700.1                  | 5.9                        | 5.1                       | -1.7                 | 0.031         |
| 1451156_s_at  | Vldlr          | very low density lipoprotein receptor                                   | Mm.4141.2                    | 5.5                        | 4.7                       | -1.7                 | 0.009         |
| 1418472_at    | Aspa           | aspartoacylase                                                          | Mm.20317.1                   | 8.5                        | 7.7                       | -1.8                 | 0.029         |
| 1422178_a_at  | Rab17          | RAB17, member RAS oncogene family                                       | Mm.38889.1                   | 9.3                        | 8.5                       | -1.8                 | 0.004         |
| 1454995_at    | Ddah1          | dimethylarginine dimethylaminohydrolase 1                               | Mm.119073.1                  | 10.8                       | 10.0                      | -1.8                 | 0.000         |
| 1431833_a_at  | Hmgcs2         | 3-hydroxy-3-methylglutaryl-Coenzyme A synthase 2                        | Mm.10633.2                   | 12.5                       | 11.7                      | -1.8                 | 0.016         |
| 1431930_x_at  | Crls1          | cardiolipin synthase 1                                                  | Mm.37972.3                   | 9.8                        | 9.0                       | -1.8                 | 0.026         |
| 1433734_at    | Slc13a4        | solute carrier family 13 (sodium/sulfate symporters), member 4          | Mm.23666.1                   | 6.5                        | 5.6                       | -1.8                 | 0.009         |
| 1455826_a_at  | Bace1          | beta-site APP cleaving enzyme 1                                         | Mm.24044.2                   | 7.3                        | 6.5                       | -1.8                 | 0.003         |
| 1425312_s_at  | Cpsf4l         | cleavage and polyadenylation specific factor 4-like                     | Mm.195521.1                  | 7.2                        | 6.4                       | -1.8                 | 0.026         |
| 1447157_at    | 4930480K23 Rik | RIKEN cDNA 4930480K23 gene                                              | Mm.141422.1                  | 4.2                        | 3.4                       | -1.8                 | 0.009         |
| 1455400_at    | Ddah1          | dimethylarginine dimethylaminohydrolase 1                               | Mm.33757.1                   | 10.7                       | 9.9                       | -1.8                 | 0.001         |
| 1452107_s_at  | Npnt           | nephronectin                                                            | Mm.205021.4                  | 3.7                        | 2.9                       | -1.8                 | 0.048         |
| 1423878_at    | Gypc           | glycophorin C                                                           | Mm.38774.1                   | 8.2                        | 7.4                       | -1.8                 | 0.027         |
| 1447854_s_at  | Hist2h2be      | histone cluster 2, H2be                                                 | Mm.200193.1                  | 5.0                        | 4.2                       | -1.8                 | 0.018         |
| 1451579_at    | BC024139       | cDNA sequence BC024139                                                  | Mm.205253.1                  | 6.7                        | 5.9                       | -1.8                 | 0.001         |
| 1457227_at    | Gm11266        | predicted gene 11266                                                    | Mm.41666.1                   | 5.8                        | 4.9                       | -1.8                 | 0.019         |
| 1429339_a_at  | Acad10         | acyl-Coenzyme A dehydrogenase family, member 10                         | Mm.24273.2                   | 8.6                        | 7.8                       | -1.8                 | 0.034         |
| 1439024_at    | Bag4           | BCL2-associated athanogene 4                                            | Mm.35264.1                   | 9.3                        | 8.5                       | -1.8                 | 0.007         |
| 1440624_at    |                |                                                                         | Mm.214662.1                  | 5.7                        | 4.9                       | -1.8                 | 0.011         |
| 1449568_at    | Klb            | klotho beta                                                             | Mm.45274.1                   | 9.7                        | 8.9                       | -1.8                 | 0.003         |
| 1450242_at    | Tlr5           | toll-like receptor 5                                                    | Mm.116894.1                  | 6.5                        | 5.7                       | -1.8                 | 0.023         |
| 1416049_at    | Gldc           | glycine decarboxylase                                                   | Mm.27953.1                   | 10.7                       | 9.9                       | -1.8                 | 0.019         |
| 1429899_at    | 5730414N17 Rik | RIKEN cDNA 5730414N17 gene                                              | Mm.112365.1                  | 7.4                        | 6.5                       | -1.8                 | 0.041         |
| 1437424_at    | Syde2          | synapse defective 1, Rho GTPase, homolog 2 (C. elegans)                 | Mm.24692.1                   | 7.8                        | 6.9                       | -1.8                 | 0.017         |
| 1457284_at    |                |                                                                         | Mm.45553.1                   | 5.5                        | 4.7                       | -1.8                 | 0.018         |
| 1438238_at    | 2010315B03 Rik | RIKEN cDNA 2010315B03 gene                                              | Mm.86344.1                   | 8.2                        | 7.3                       | -1.8                 | 0.010         |
| 1429299_at    | Ddah1          | dimethylarginine dimethylaminohydrolase 1                               | Mm.30203.1                   | 9.7                        | 8.8                       | -1.8                 | 0.001         |
| 1434987_at    | Aldh2          | aldehyde dehydrogenase 2, mitochondrial                                 | Mm.2621.2                    | 8.9                        | 8.0                       | -1.8                 | 0.035         |
| 1451527_at    | Pcolce2        | procollagen C-endopeptidase enhancer 2                                  | Mm.46016.1                   | 6.5                        | 5.6                       | -1.8                 | 0.018         |

**Supplemental Table 8. Significant differently expressed genes in 1KI HCC samples**

| Affymetrix ID | Gene Symbol    | Description                                                                     | Transcript ID (Array Design) | 3aKO avg signal log2 (n=5) | 1KI Avg Signal log2 (n=5) | Fold Change (linear) | ANOVA p-value |
|---------------|----------------|---------------------------------------------------------------------------------|------------------------------|----------------------------|---------------------------|----------------------|---------------|
| 1428338_at    | Spata2l        | spermatogenesis associated 2-like                                               | Mm.41459.1                   | 8.5                        | 7.6                       | -1.9                 | 0.008         |
| 1434817_s_at  | Rprd2          | regulation of nuclear pre-mRNA domain containing 2                              | Mm.26257.1                   | 7.3                        | 6.4                       | -1.9                 | 0.027         |
| 1418857_at    | Slc13a2        | solute carrier family 13 (sodium-dependent dicarboxylate transporter), member 2 | Mm.57258.1                   | 6.5                        | 5.6                       | -1.9                 | 0.000         |
| 1418739_at    | Sgk2           | serum/glucocorticoid regulated kinase 2                                         | Mm.26462.1                   | 10.4                       | 9.5                       | -1.9                 | 0.024         |
| 1441413_at    |                |                                                                                 | Mm.215325.1                  | 9.1                        | 8.2                       | -1.9                 | 0.049         |
| 1444589_at    | Gm4944         | predicted gene 4944                                                             | Mm.31829.1                   | 5.9                        | 5.0                       | -1.9                 | 0.001         |
| 1417784_at    | Als2           | amyotrophic lateral sclerosis 2 (juvenile)                                      | Mm.30114.1                   | 6.0                        | 5.1                       | -1.9                 | 0.009         |
| 1420541_at    | Rdh16          | retinol dehydrogenase 16                                                        | Mm.100276.1                  | 9.4                        | 8.5                       | -1.9                 | 0.036         |
| 1455281_at    | Wdr33          | WD repeat domain 33                                                             | Mm.32512.3                   | 6.1                        | 5.2                       | -1.9                 | 0.005         |
| 1435292_at    | Tbc1d4         | TBC1 domain family, member 4                                                    | Mm.27439.1                   | 6.0                        | 5.1                       | -1.9                 | 0.004         |
| 1418649_at    | Egln3          | egl-9 family hypoxia-inducible factor 3                                         | Mm.33484.1                   | 8.4                        | 7.4                       | -1.9                 | 0.013         |
| 1439331_at    | 4932439E07 Rik | RIKEN cDNA 4932439E07 gene                                                      | Mm.43978.1                   | 6.2                        | 5.3                       | -1.9                 | 0.007         |
| 1443908_at    | Gm19696        | predicted gene, 19696                                                           | Mm.215578.1                  | 8.4                        | 7.4                       | -1.9                 | 0.014         |
| 1456395_at    | Ppargc1a       | peroxisome proliferative activated receptor, gamma, coactivator 1 alpha         | Mm.10707.3                   | 7.2                        | 6.3                       | -1.9                 | 0.013         |
| 1442169_at    | Vldlr          | very low density lipoprotein receptor                                           | Mm.202246.1                  | 7.0                        | 6.0                       | -1.9                 | 0.017         |
| 1457791_at    | B830008H07 Rik | RIKEN cDNA B830008H07 gene                                                      | Mm.37292.1                   | 9.8                        | 8.8                       | -1.9                 | 0.016         |
| 1426243_at    | Cth            | cystathionase (cystathionine gamma-lyase)                                       | Mm.28301.1                   | 12.1                       | 11.1                      | -2.0                 | 0.004         |
| 1440965_at    | Pigl           | phosphatidylinositol glycan anchor biosynthesis, class L                        | Mm.37323.1                   | 8.2                        | 7.2                       | -2.0                 | 0.003         |
| 1453547_at    | 1810046K07 Rik | RIKEN cDNA 1810046K07 gene                                                      | Mm.75315.1                   | 7.2                        | 6.3                       | -2.0                 | 0.007         |
| 1423495_at    | Decr2          | 2-4-dienoyl-Coenzyme A reductase 2, peroxisomal                                 | Mm.35760.1                   | 11.8                       | 10.8                      | -2.0                 | 0.000         |
| 1432181_s_at  | Sco2           | SCO cytochrome oxidase deficient homolog 2 (yeast)                              | Mm.219419.2                  | 10.8                       | 9.8                       | -2.0                 | 0.023         |
| 1431199_at    | Ggnbp1         | gametogenetin binding protein 1                                                 | Mm.105357.1                  | 7.9                        | 6.9                       | -2.0                 | 0.002         |
| 1458658_at    |                |                                                                                 | Mm.139088.1                  | 5.1                        | 4.1                       | -2.0                 | 0.000         |
| 1436931_at    | Rfx4           | regulatory factor X, 4 (influences HLA class II expression)                     | Mm.32654.1                   | 6.4                        | 5.4                       | -2.0                 | 0.034         |
| 1452375_at    | Aldh4a1        | aldehyde dehydrogenase 4 family, member A1                                      | Mm.218879.1                  | 12.2                       | 11.2                      | -2.0                 | 0.016         |
| 1432562_at    | 1110006G14 Rik | SRY (sex determining region Y)-box 6, opposite strand                           | Mm.158213.1                  | 6.1                        | 5.1                       | -2.0                 | 0.002         |
| 1430410_at    | 1810019N24 Rik | RIKEN cDNA 1810019N24 gene                                                      | Mm.158236.1                  | 5.0                        | 4.0                       | -2.0                 | 0.001         |
| 1443921_at    | Ranbp3l        | RAN binding protein 3-like                                                      | Mm.209787.1                  | 5.8                        | 4.8                       | -2.1                 | 0.013         |
| 1454402_at    | Zfp942         | zinc finger protein 942                                                         | Mm.219772.1                  | 3.7                        | 2.6                       | -2.1                 | 0.010         |



**Supplemental Table 8. Significant differently expressed genes in 1KI HCC samples**

| Affymetrix ID | Gene Symbol       | Description                                                         | Transcript ID (Array Design) | 3aKO avg signal log2 (n=5) | 1KI Avg Signal log2 (n=5) | Fold Change (linear) | ANOVA p-value |
|---------------|-------------------|---------------------------------------------------------------------|------------------------------|----------------------------|---------------------------|----------------------|---------------|
| 1449001_at    | Ivd               | isovaleryl coenzyme A dehydrogenase                                 | Mm.6635.1                    | 10.2                       | 9.2                       | -2.1                 | 0.045         |
| 1453692_at    | 4930581F22<br>Rik | RIKEN cDNA 4930581F22 gene                                          | Mm.160157.1                  | 7.6                        | 6.6                       | -2.1                 | 0.000         |
| 1435349_at    | Nrp2              | neuropilin 2                                                        | Mm.37629.1                   | 8.5                        | 7.4                       | -2.1                 | 0.008         |
| 1421758_at    | Nat1              | N-acetyl transferase 1                                              | Mm.14125.1                   | 7.3                        | 6.2                       | -2.1                 | 0.014         |
| 1426389_at    | Camk1d            | calcium/calmodulin-dependent protein kinase ID                      | Mm.26888.1                   | 8.2                        | 7.2                       | -2.1                 | 0.050         |
| 1450271_at    | Ptk6              | PTK6 protein tyrosine kinase 6                                      | Mm.4497.1                    | 4.4                        | 3.3                       | -2.1                 | 0.014         |
| 1431648_at    | Meiob             | meiosis specific with OB domains                                    | Mm.52592.1                   | 8.6                        | 7.5                       | -2.1                 | 0.005         |
| 1417130_s_at  | Angptl4           | angiopoietin-like 4                                                 | Mm.196189.1                  | 9.9                        | 8.8                       | -2.1                 | 0.010         |
| 1435893_at    | Vldlr             | very low density lipoprotein receptor                               | Mm.32795.1                   | 7.2                        | 6.1                       | -2.1                 | 0.037         |
| 1460258_at    | Lect1             | leukocyte cell derived chemotaxin 1                                 | Mm.46561.1                   | 7.7                        | 6.6                       | -2.1                 | 0.025         |
| 1417714_x_at  | Hba-a1            | hemoglobin alpha, adult chain 1;<br>hemoglobin alpha, adult chain 2 | Mm.196110.1                  | 13.5                       | 12.4                      | -2.1                 | 0.005         |
| 1417976_at    | Ada               | adenosine deaminase                                                 | Mm.388.1                     | 6.6                        | 5.5                       | -2.2                 | 0.008         |
| 1432916_at    | 5730407107R<br>ik | RIKEN cDNA 5730407107 gene                                          | Mm.158393.1                  | 5.5                        | 4.4                       | -2.2                 | 0.002         |
| 1455100_at    | Akr1d1            | aldo-keto reductase family 1, member D1                             | Mm.77361.2                   | 9.4                        | 8.3                       | -2.2                 | 0.042         |
| 1417066_at    | Adck3             | aarF domain containing kinase 3                                     | Mm.28337.1                   | 11.3                       | 10.2                      | -2.2                 | 0.009         |
| 1427480_at    | Leap2             | liver-expressed antimicrobial peptide 2                             | Mm.24283.1                   | 11.4                       | 10.3                      | -2.2                 | 0.019         |
| 1450069_a_at  | Celf2             | CUGBP, Elav-like family member 2                                    | Mm.27880.1                   | 7.6                        | 6.5                       | -2.2                 | 0.007         |
| 1420385_at    | Gna14             | guanine nucleotide binding protein, alpha 14                        | Mm.22322.1                   | 6.5                        | 5.4                       | -2.2                 | 0.042         |
| 1425409_at    | Chrna2            | cholinergic receptor, nicotinic, alpha polypeptide 2 (neuronal)     | Mm.57350.1                   | 5.9                        | 4.8                       | -2.2                 | 0.006         |
| 1435645_at    | Mmd               | monocyte to macrophage differentiation-associated                   | Mm.139683.1                  | 8.9                        | 7.8                       | -2.2                 | 0.027         |
| 1431803_at    | Cyp2d13           | cytochrome P450, family 2, subfamily d, polypeptide 13              | Mm.46933.2                   | 10.3                       | 9.2                       | -2.2                 | 0.035         |
| 1435514_at    | Lztf1l            | leucine zipper transcription factor-like 1                          | Mm.39928.2                   | 4.5                        | 3.4                       | -2.3                 | 0.002         |
| 1452823_at    | Gstk1             | glutathione S-transferase kappa 1                                   | Mm.27395.1                   | 12.5                       | 11.3                      | -2.3                 | 0.018         |
| 1439934_at    | Slc30a10          | solute carrier family 30, member 10                                 | Mm.187893.1                  | 9.1                        | 7.9                       | -2.3                 | 0.038         |
| 1417067_s_at  | Adck3             | aarF domain containing kinase 3                                     | Mm.28337.1                   | 7.1                        | 5.9                       | -2.3                 | 0.001         |
| 1423895_a_at  | Celf2             | CUGBP, Elav-like family member 2                                    | Mm.27880.2                   | 8.7                        | 7.5                       | -2.3                 | 0.010         |
| 1426664_x_at  | Slc45a3           | solute carrier family 45, member 3                                  | Mm.200307.1                  | 8.5                        | 7.3                       | -2.3                 | 0.023         |
| 1460318_at    | Csrp3             | cysteine and glycine-rich protein 3                                 | Mm.17235.1                   | 9.5                        | 8.3                       | -2.3                 | 0.017         |
| 1425771_at    | Akr1d1            | aldo-keto reductase family 1, member D1                             | Mm.77361.1                   | 11.6                       | 10.4                      | -2.4                 | 0.036         |
| 1417280_at    | Slc17a1           | solute carrier family 17 (sodium phosphate), member 1               | Mm.2656.1                    | 8.7                        | 7.5                       | -2.4                 | 0.000         |
| 1453287_at    | Ankrd33b          | ankyrin repeat domain 33B                                           | Mm.27619.1                   | 7.9                        | 6.7                       | -2.4                 | 0.007         |
| 1428832_at    | 1600002H07<br>Rik | RIKEN cDNA 1600002H07 gene                                          | Mm.23881.1                   | 8.9                        | 7.6                       | -2.4                 | 0.017         |

**Supplemental Table 8. Significant differently expressed genes in 1KI HCC samples**

| Affymetrix ID | Gene Symbol    | Description                                                 | Transcript ID (Array Design) | 3aKO avg signal log2 (n=5) | 1KI Avg Signal log2 (n=5) | Fold Change (linear) | ANOVA p-value |
|---------------|----------------|-------------------------------------------------------------|------------------------------|----------------------------|---------------------------|----------------------|---------------|
| 1436867_at    | Srl            | sarcalumenin                                                | Mm.35811.1                   | 6.0                        | 4.8                       | <b>-2.4</b>          | 0.027         |
| 1451373_at    | Ugt3a1         | UDP glycosyltransferases 3 family, polypeptide A1           | Mm.201628.1                  | 10.8                       | 9.6                       | <b>-2.4</b>          | 0.002         |
| 1438258_at    | Vldlr          | very low density lipoprotein receptor                       | Mm.38836.1                   | 7.2                        | 6.0                       | <b>-2.4</b>          | 0.014         |
| 1421183_at    | Tex12          | testis expressed gene 12                                    | Mm.78133.1                   | 6.7                        | 5.4                       | <b>-2.4</b>          | 0.015         |
| 1427410_at    | Dleu2          | deleted in lymphocytic leukemia, 2                          | Mm.25679.1                   | 8.3                        | 7.0                       | <b>-2.5</b>          | 0.045         |
| 1419906_at    | Hpgd           | hydroxyprostaglandin dehydrogenase 15 (NAD)                 | Mm.199536.1                  | 8.9                        | 7.6                       | <b>-2.5</b>          | 0.019         |
| 1425246_at    | 0610008F07 Rik | hepatic nuclear factor 4 alpha, opposite strand             | Mm.46190.1                   | 7.5                        | 6.2                       | <b>-2.5</b>          | 0.001         |
| 1429809_at    | Tmtc2          | transmembrane and tetratricopeptide repeat containing 2     | Mm.37266.1                   | 6.7                        | 5.4                       | <b>-2.5</b>          | 0.011         |
| 1426663_s_at  | Slc45a3        | solute carrier family 45, member 3                          | Mm.200307.1                  | 8.9                        | 7.6                       | <b>-2.5</b>          | 0.019         |
| 1438975_x_at  | Zdhhc14        | zinc finger, DHHC domain containing 14                      | Mm.22338.7                   | 7.1                        | 5.8                       | <b>-2.5</b>          | 0.002         |
| 1438751_at    | Slc30a10       | solute carrier family 30, member 10                         | Mm.62038.1                   | 8.6                        | 7.3                       | <b>-2.6</b>          | 0.046         |
| 1435872_at    |                |                                                             | Mm.2322.3                    | 8.5                        | 7.0                       | <b>-2.7</b>          | 0.005         |
| 1449298_a_at  | Pde1a          | phosphodiesterase 1A, calmodulin-dependent                  | Mm.40678.1                   | 6.7                        | 5.2                       | <b>-2.7</b>          | 0.010         |
| 1421430_at    | Rad51b         | RAD51 homolog B                                             | Mm.25289.1                   | 8.8                        | 7.3                       | <b>-2.8</b>          | 0.010         |
| 1424715_at    | Retsat         | retinol saturase (all trans retinol 13,14 reductase)        | Mm.27506.1                   | 12.8                       | 11.3                      | <b>-2.8</b>          | 0.011         |
| 1437614_x_at  | Zdhhc14        | zinc finger, DHHC domain containing 14                      | Mm.22338.2                   | 7.2                        | 5.7                       | <b>-2.9</b>          | 0.003         |
| 1424493_s_at  | Ugt3a1         | UDP glycosyltransferases 3 family, polypeptide A1           | Mm.201628.1                  | 10.5                       | 9.0                       | <b>-2.9</b>          | 0.001         |
| 1417355_at    | Peg3           | paternally expressed 3                                      | Mm.7952.1                    | 8.4                        | 6.9                       | <b>-3.0</b>          | 0.037         |
| 1451154_a_at  | Celf2          | CUGBP, Elav-like family member 2                            | Mm.27880.2                   | 8.1                        | 6.5                       | <b>-3.0</b>          | 0.006         |
| 1455786_at    | Zfp820         | zinc finger protein 820                                     | Mm.42298.1                   | 5.5                        | 3.9                       | <b>-3.0</b>          | 0.033         |
| 1420405_at    | Slco1a4        | solute carrier organic anion transporter family, member 1a4 | Mm.101645.1                  | 10.6                       | 8.9                       | <b>-3.1</b>          | 0.044         |
| 1428636_at    | Steap2         | six transmembrane epithelial antigen of prostate 2          | Mm.41944.1                   | 6.0                        | 4.3                       | <b>-3.2</b>          | 0.001         |
| 1427329_a_at  | Ighm           | immunoglobulin heavy constant mu                            | Mm.28362.2                   | 8.4                        | 6.7                       | <b>-3.3</b>          | 0.007         |
| 1424716_at    | Retsat         | retinol saturase (all trans retinol 13,14 reductase)        | Mm.27506.1                   | 10.6                       | 8.9                       | <b>-3.3</b>          | 0.006         |
| 1429822_at    | 4633401B06 Rik | RIKEN cDNA 4633401B06 gene                                  | Mm.178280.1                  | 8.7                        | 6.9                       | <b>-3.5</b>          | 0.020         |
| 1419094_at    | Cyp2c37        | cytochrome P450, family 2. subfamily c, polypeptide 37      | Mm.220317.1                  | 7.0                        | 5.2                       | <b>-3.6</b>          | 0.047         |
| 1440921_at    | Nlrp12         | NLR family, pyrin domain containing 12                      | Mm.161578.1                  | 8.8                        | 7.0                       | <b>-3.6</b>          | 0.037         |
| 1423891_at    | Gstt3          | glutathione S-transferase, theta 3                          | Mm.25313.1                   | 10.7                       | 8.8                       | <b>-3.7</b>          | 0.030         |
| 1424838_at    | Ncmap          | noncompact myelin associated protein                        | Mm.35548.1                   | 8.2                        | 6.3                       | <b>-3.8</b>          | 0.023         |
| 1431817_at    | Adh6-ps1       | alcohol dehydrogenase 6 (class V), pseudogene 1             | Mm.158750.1                  | 5.9                        | 4.0                       | <b>-3.8</b>          | 0.046         |

**Supplemental Table 8. Significant differently expressed genes in 1KI HCC samples**

| Affymetrix ID | Gene Symbol | Description                                                                                                    | Transcript ID (Array Design) | 3aKO avg signal log2 (n=5) | 1KI Avg Signal log2 (n=5) | Fold Change (linear) | ANOVA p-value |
|---------------|-------------|----------------------------------------------------------------------------------------------------------------|------------------------------|----------------------------|---------------------------|----------------------|---------------|
| 1458297_s_at  | Marco       | macrophage receptor with collagenous structure                                                                 | Mm.200861.1                  | 7.2                        | 5.2                       | <b>-3.9</b>          | 0.007         |
| 1427351_s_at  | Ighm        | immunoglobulin heavy constant mu                                                                               | Mm.218842.1                  | 9.8                        | 7.8                       | <b>-4.0</b>          | 0.004         |
| 1418051_at    | Ephb6       | Eph receptor B6                                                                                                | Mm.1480.1                    | 6.0                        | 4.0                       | <b>-4.1</b>          | 0.000         |
| 1417880_at    | G6pc        | glucose-6-phosphatase, catalytic                                                                               | Mm.18064.1                   | 11.1                       | 8.9                       | <b>-4.9</b>          | 0.023         |
| 1437128_a_at  | Zfp945      | zinc finger protein 945                                                                                        | Mm.33710.2                   | 7.1                        | 4.7                       | <b>-5.0</b>          | 0.001         |
| 1448080_at    | Gm2788      | predicted gene 2788                                                                                            | Mm.176935.2                  | 10.1                       | 7.3                       | <b>-6.9</b>          | 0.014         |
| 1449498_at    | Marco       | macrophage receptor with collagenous structure                                                                 | Mm.1856.1                    | 8.3                        | 5.3                       | <b>-7.6</b>          | 0.005         |
| 1416318_at    | Serpinb1a   | serine (or cysteine) peptidase inhibitor, clade B, member 1a                                                   | Mm.46316.1                   | 9.4                        | 6.4                       | <b>-8.0</b>          | 0.030         |
| 1424853_s_at  | Cyp4a10     | cytochrome P450, family 4, subfamily a, polypeptide 10; cytochrome P450, family 4, subfamily a, polypeptide 31 | Mm.10742.1                   | 13.4                       | 10.1                      | <b>-10.1</b>         | 0.049         |

**Supplemental Table 9. Significant differently expressed genes in 3bKI HCC samples**

| Affymetrix ID | Gene Symbol | Description                                                  | Transcript ID<br>(Array Design) | 3aKO<br>avg<br>signal<br>log2<br>(n=4) | 3bKI<br>Avg<br>Signal<br>log2<br>(n=5) | Fold<br>Change<br>(linear) | ANOVA<br>p-value |
|---------------|-------------|--------------------------------------------------------------|---------------------------------|----------------------------------------|----------------------------------------|----------------------------|------------------|
| 1419669_at    | Prtn3       | proteinase 3                                                 | Mm.2364.1                       | 4.6                                    | 8.5                                    | <b>14.96</b>               | 0.01             |
| 1460550_at    | Mtmr11      | myotubularin related protein 11                              | Mm.24379.1                      | 4.7                                    | 7.9                                    | <b>9.34</b>                | 0.00             |
| 1416930_at    | Ly6d        | lymphocyte antigen 6 complex, locus D                        | Mm.878.1                        | 6.1                                    | 9.0                                    | <b>7.38</b>                | 0.00             |
| 1436503_at    | BC048546    | cDNA sequence BC048546                                       | Mm.26869.1                      | 6.6                                    | 9.2                                    | <b>6.12</b>                | 0.00             |
| 1424649_a_at  | Tspan8      | tetraspanin 8                                                | Mm.22270.1                      | 3.9                                    | 6.4                                    | <b>5.59</b>                | 0.01             |
| 1427747_a_at  | Lcn2        | lipocalin 2                                                  | Mm.9537.1                       | 8.3                                    | 10.8                                   | <b>5.54</b>                | 0.02             |
| 1448377_at    | Slpi        | secretory leukocyte peptidase inhibitor                      | Mm.1395.1                       | 8.1                                    | 10.6                                   | <b>5.52</b>                | 0.03             |
| 1416645_a_at  | Afp         | alpha fetoprotein                                            | Mm.80.1                         | 3.3                                    | 5.8                                    | <b>5.49</b>                | 0.00             |
| 1422437_at    | Col5a2      | collagen, type V, alpha 2                                    | Mm.10299.1                      | 5.6                                    | 8.1                                    | <b>5.48</b>                | 0.00             |
| 1418457_at    | Cxcl14      | chemokine (C-X-C motif) ligand 14                            | Mm.30211.1                      | 3.7                                    | 6.1                                    | <b>5.4</b>                 | 0.04             |
| 1425120_x_at  | Ifi2712b    | interferon, alpha-inducible protein 27 like 2B               | Mm.46348.1                      | 7.5                                    | 9.9                                    | <b>5.31</b>                | 0.00             |
| 1416022_at    | Fabp5       | fatty acid binding protein 5, epidermal                      | Mm.741.1                        | 9.1                                    | 11.6                                   | <b>5.3</b>                 | 0.02             |
| 1448754_at    | Rbp1        | retinol binding protein 1, cellular                          | Mm.2450.1                       | 8.7                                    | 11.1                                   | <b>5.19</b>                | 0.00             |
| 1417507_at    | Cyb561      | cytochrome b-561                                             | Mm.154456.1                     | 5.1                                    | 7.4                                    | <b>5.03</b>                | 0.04             |
| 1456226_x_at  | Ddr1        | discoidin domain receptor family, member 1                   | Mm.5021.4                       | 3.1                                    | 5.4                                    | <b>4.95</b>                | 0.01             |
| 1417370_at    | Tff3        | trefoil factor 3, intestinal                                 | Mm.4641.1                       | 5.4                                    | 7.7                                    | <b>4.91</b>                | 0.03             |
| 1417267_s_at  | Fkbp11      | FK506 binding protein 11                                     | Mm.30729.1                      | 7.0                                    | 9.2                                    | <b>4.85</b>                | 0.01             |
| 1448595_a_at  | Bex1        | brain expressed gene 1                                       | Mm.14768.1                      | 3.0                                    | 5.3                                    | <b>4.85</b>                | 0.03             |
| 1424857_a_at  | Trim34a     | tripartite motif-containing 34A                              | Mm.219657.2                     | 4.2                                    | 6.4                                    | <b>4.83</b>                | 0.02             |
| 1437094_x_at  | Dnaic1      | dynein, axonemal, intermediate chain 1                       | Mm.79127.1                      | 5.2                                    | 7.5                                    | <b>4.82</b>                | 0.01             |
| 1416021_a_at  | Fabp5       | fatty acid binding protein 5, epidermal                      | Mm.741.1                        | 10.3                                   | 12.6                                   | <b>4.73</b>                | 0.02             |
| 1448261_at    | Cdh1        | cadherin 1                                                   | Mm.35605.1                      | 6.3                                    | 8.5                                    | <b>4.71</b>                | 0.04             |
| 1424638_at    | Cdkn1a      | cyclin-dependent kinase inhibitor 1A (P21)                   | Mm.34446.2                      | 7.0                                    | 9.2                                    | <b>4.66</b>                | 0.00             |
| 1449326_x_at  | Saa2        | serum amyloid A 2                                            | Mm.200941.1                     | 7.6                                    | 9.8                                    | <b>4.61</b>                | 0.04             |
| 1431362_a_at  | Smoc2       | SPARC related modular calcium binding 2                      | Mm.30162.2                      | 4.1                                    | 6.3                                    | <b>4.57</b>                | 0.00             |
| 1437093_at    | Dnaic1      | dynein, axonemal, intermediate chain 1                       | Mm.79127.1                      | 5.2                                    | 7.4                                    | <b>4.48</b>                | 0.01             |
| 1415935_at    | Smoc2       | SPARC related modular calcium binding 2                      | Mm.30162.1                      | 5.6                                    | 7.8                                    | <b>4.46</b>                | 0.00             |
| 1448194_a_at  | H19         | H19, imprinted maternally expressed transcript; microRNA 675 | Mm.14802.1                      | 3.6                                    | 5.8                                    | <b>4.38</b>                | 0.01             |
| 1427220_a_at  | Svs5        | seminal vesicle secretory protein 5                          | Mm.140154.2                     | 3.9                                    | 6.0                                    | <b>4.36</b>                | 0.00             |
| 1424339_at    | Oasl1       | 2'-5' oligoadenylate synthetase-like 1                       | Mm.95479.1                      | 6.1                                    | 8.2                                    | <b>4.35</b>                | 0.00             |
| 1418191_at    | Usp18       | ubiquitin specific peptidase 18                              | Mm.27498.1                      | 6.3                                    | 8.4                                    | <b>4.21</b>                | 0.01             |
| 1421679_a_at  | Cdkn1a      | cyclin-dependent kinase inhibitor 1A (P21)                   | Mm.34446.1                      | 6.9                                    | 8.9                                    | <b>4.05</b>                | 0.00             |

**Supplemental Table 9. Significant differently expressed genes in 3bKI HCC samples**

| Affymetrix ID | Gene Symbol   | Description                                                                                                                                                           | Transcript ID<br>(Array Design) | 3aKO<br>avg<br>signal<br>log2<br>(n=4) | 3bKI<br>Avg<br>Signal<br>log2<br>(n=5) | Fold<br>Change<br>(linear) | ANOVA<br>p-value |
|---------------|---------------|-----------------------------------------------------------------------------------------------------------------------------------------------------------------------|---------------------------------|----------------------------------------|----------------------------------------|----------------------------|------------------|
| 1459333_at    |               |                                                                                                                                                                       | Mm.17671.1                      | 4.8                                    | 6.9                                    | <b>4.03</b>                | 0.00             |
| 1460406_at    | Pls1          | plastin 1 (I-isoform)                                                                                                                                                 | Mm.11869.1                      | 6.6                                    | 8.6                                    | <b>3.99</b>                | 0.01             |
| 1417821_at    | D17H6S56E-5   | DNA segment, Chr 17, human<br>D6S56E 5                                                                                                                                | Mm.22506.1                      | 4.7                                    | 6.7                                    | <b>3.95</b>                | 0.05             |
| 1435665_at    | Trim30d       | tripartite motif-containing 30D                                                                                                                                       | Mm.33905.1                      | 4.4                                    | 6.4                                    | <b>3.94</b>                | 0.04             |
| 1419398_a_at  | Reep5         | receptor accessory protein 5                                                                                                                                          | Mm.21251.1                      | 8.1                                    | 10.1                                   | <b>3.92</b>                | 0.00             |
| 1423556_at    | Akr1b7        | aldo-keto reductase family 1,<br>member B7                                                                                                                            | Mm.14460.1                      | 5.0                                    | 7.0                                    | <b>3.9</b>                 | 0.03             |
| 1435275_at    | Cox6b2        | cytochrome c oxidase subunit VIb<br>polypeptide 2                                                                                                                     | Mm.29625.1                      | 5.5                                    | 7.4                                    | <b>3.84</b>                | 0.02             |
| 1429734_at    | 4632434I11Rik | DNA damage-induced apoptosis<br>suppressor                                                                                                                            | Mm.26468.1                      | 4.8                                    | 6.7                                    | <b>3.76</b>                | 0.00             |
| 1449002_at    | Phlda3        | pleckstrin homology-like domain,<br>family A, member 3                                                                                                                | Mm.34346.1                      | 6.9                                    | 8.8                                    | <b>3.76</b>                | 0.03             |
| 1454686_at    | 6430706D22Rik | RIKEN cDNA 6430706D22 gene;<br>RIKEN cDNA A730008H23 gene;<br>Holliday junction recognition protein                                                                   | Mm.22226.2                      | 6.1                                    | 8.1                                    | <b>3.76</b>                | 0.00             |
| 1419195_at    | Wfdc15b       | WAP four-disulfide core domain 15B                                                                                                                                    | Mm.10859.1                      | 5.9                                    | 7.8                                    | <b>3.73</b>                | 0.00             |
| 1418171_at    | Tceal8        | transcription elongation factor A (SII)-<br>like 8                                                                                                                    | Mm.182094.1                     | 7.0                                    | 8.9                                    | <b>3.72</b>                | 0.00             |
| 1430979_a_at  | Prdx2         | peroxiredoxin 2                                                                                                                                                       | Mm.42948.2                      | 5.7                                    | 7.6                                    | <b>3.69</b>                | 0.01             |
| 1428116_a_at  | Dynlt1a       | dynein light chain Tctex-type 1A;<br>dynein light chain Tctex-type 1B;<br>dynein light chain Tctex-type 1C;<br>dynein light chain Tctex-type 1F                       | Mm.1948.2                       | 7.9                                    | 9.8                                    | <b>3.66</b>                | 0.00             |
| 1427167_at    | Armcx4        | armadillo repeat containing, X-linked<br>4                                                                                                                            | Mm.31961.1                      | 3.5                                    | 5.4                                    | <b>3.65</b>                | 0.02             |
| 1415904_at    | Lpl           | lipoprotein lipase                                                                                                                                                    | Mm.1514.1                       | 8.2                                    | 10.1                                   | <b>3.64</b>                | 0.01             |
| 1448272_at    | Btg2          | B cell translocation gene 2, anti-<br>proliferative                                                                                                                   | Mm.903.1                        | 7.1                                    | 8.9                                    | <b>3.62</b>                | 0.01             |
| 1425385_a_at  | Ighg2c        | RecName: Full=Ig gamma-2A chain<br>C region secreted form; AltName:<br>Full=B allele;; immunoglobulin heavy<br>constant gamma 2C;<br>immunoglobulin heavy constant mu | Mm.144308.1                     | 4.4                                    | 6.2                                    | <b>3.56</b>                | 0.01             |
| 1445328_at    | Col4a4        | collagen, type IV, alpha 4                                                                                                                                            | Mm.40253.1                      | 3.7                                    | 5.5                                    | <b>3.56</b>                | 0.01             |
| 1433575_at    | Sox4          | SRY (sex determining region Y)-box<br>4                                                                                                                               | Mm.18789.2                      | 6.0                                    | 7.8                                    | <b>3.5</b>                 | 0.00             |
| 1453473_a_at  | Dynlt1a       | dynein light chain Tctex-type 1A;<br>dynein light chain Tctex-type 1B;<br>dynein light chain Tctex-type 1C;<br>dynein light chain Tctex-type 1F                       | Mm.1948.3                       | 7.2                                    | 9.0                                    | <b>3.5</b>                 | 0.00             |
| 1419491_at    | Defb1         | defensin beta 1                                                                                                                                                       | Mm.5341.1                       | 4.1                                    | 5.9                                    | <b>3.49</b>                | 0.01             |
| 1451780_at    | Blnk          | B cell linker                                                                                                                                                         | Mm.9749.1                       | 6.7                                    | 8.5                                    | <b>3.34</b>                | 0.00             |

**Supplemental Table 9. Significant differently expressed genes in 3bKI HCC samples**

| Affymetrix ID | Gene Symbol   | Description                                                                                                                                                                                                                                              | Transcript ID<br>(Array Design) | 3aKO<br>avg<br>signal<br>log2<br>(n=4) | 3bKI<br>Avg<br>Signal<br>log2<br>(n=5) | Fold<br>Change<br>(linear) | ANOVA<br>p-value |
|---------------|---------------|----------------------------------------------------------------------------------------------------------------------------------------------------------------------------------------------------------------------------------------------------------|---------------------------------|----------------------------------------|----------------------------------------|----------------------------|------------------|
| 1451456_at    | 6430706D22Rik | RIKEN cDNA 6430706D22 gene;<br>RIKEN cDNA A730008H23 gene;<br>Holliday junction recognition protein                                                                                                                                                      | Mm.22226.1                      | 3.7                                    | 5.4                                    | <b>3.32</b>                | 0.00             |
| 1438001_x_at  | Reep5         | receptor accessory protein 5                                                                                                                                                                                                                             | Mm.21251.3                      | 7.6                                    | 9.3                                    | <b>3.31</b>                | 0.01             |
| 1438635_x_at  | B930041F14Rik | RIKEN cDNA B930041F14 gene                                                                                                                                                                                                                               | Mm.132095.1                     | 5.3                                    | 7.1                                    | <b>3.3</b>                 | 0.00             |
| 1416250_at    | Btg2          | B cell translocation gene 2, anti-proliferative                                                                                                                                                                                                          | Mm.903.1                        | 7.8                                    | 9.5                                    | <b>3.21</b>                | 0.02             |
| 1431788_at    | Fabp12        | fatty acid binding protein 12                                                                                                                                                                                                                            | Mm.47052.1                      | 5.1                                    | 6.8                                    | <b>3.19</b>                | 0.01             |
| 1431056_a_at  | Lpl           | lipoprotein lipase                                                                                                                                                                                                                                       | Mm.1514.2                       | 6.8                                    | 8.5                                    | <b>3.17</b>                | 0.02             |
| 1424775_at    | Oas1a         | 2'-5' oligoadenylate synthetase 1A                                                                                                                                                                                                                       | Mm.14301.1                      | 7.4                                    | 9.0                                    | <b>3.16</b>                | 0.01             |
| 1438009_at    | Hist1h2ab     | histone cluster 1, H2ab; histone cluster 1, H2ac; histone cluster 1, H2ad; histone cluster 1, H2ae; histone cluster 1, H2ag; histone cluster 1, H2ah; histone cluster 1, H2ai; histone cluster 1, H2an; histone cluster 1, H2ao; histone cluster 1, H2ap | Mm.14767.2                      | 7.9                                    | 9.5                                    | <b>3.15</b>                | 0.05             |
| 1416658_at    | Frzb          | frizzled-related protein                                                                                                                                                                                                                                 | Mm.3246.1                       | 4.0                                    | 5.6                                    | <b>3.12</b>                | 0.00             |
| 1424626_at    | 2010003K11Rik | RIKEN cDNA 2010003K11 gene                                                                                                                                                                                                                               | Mm.22966.1                      | 7.5                                    | 9.1                                    | <b>3.11</b>                | 0.00             |
| 1450783_at    | Ifit1         | interferon-induced protein with tetratricopeptide repeats 1                                                                                                                                                                                              | Mm.6718.1                       | 6.3                                    | 7.9                                    | <b>3.07</b>                | 0.02             |
| 1416808_at    | Nid1          | nidogen 1                                                                                                                                                                                                                                                | Mm.4691.1                       | 7.6                                    | 9.3                                    | <b>3.05</b>                | 0.03             |
| 1427883_a_at  | Col3a1        | collagen, type III, alpha 1                                                                                                                                                                                                                              | Mm.147387.1                     | 8.1                                    | 9.7                                    | <b>3.05</b>                | 0.01             |
| 1417409_at    | Jun           | jun proto-oncogene                                                                                                                                                                                                                                       | Mm.482.1                        | 7.2                                    | 8.8                                    | <b>3.02</b>                | 0.00             |
| 1418086_at    | Ppp1r14a      | protein phosphatase 1, regulatory (inhibitor) subunit 14A                                                                                                                                                                                                | Mm.46581.1                      | 5.1                                    | 6.7                                    | <b>3.02</b>                | 0.02             |
| 1450224_at    | Col4a3        | collagen, type IV, alpha 3                                                                                                                                                                                                                               | Mm.8069.1                       | 4.2                                    | 5.7                                    | <b>2.96</b>                | 0.01             |
| 1437325_x_at  | Aldh18a1      | aldehyde dehydrogenase 18 family, member A1                                                                                                                                                                                                              | Mm.29751.3                      | 3.9                                    | 5.5                                    | <b>2.93</b>                | 0.00             |
| 1433685_a_at  | 6430706D22Rik | RIKEN cDNA 6430706D22 gene;<br>RIKEN cDNA A730008H23 gene;<br>Holliday junction recognition protein                                                                                                                                                      | Mm.22226.2                      | 7.4                                    | 8.9                                    | <b>2.92</b>                | 0.00             |
| 1416953_at    | Ctgf          | connective tissue growth factor                                                                                                                                                                                                                          | Mm.1810.1                       | 7.2                                    | 8.8                                    | <b>2.91</b>                | 0.03             |
| 1455439_a_at  | Lgals1        | lectin, galactose binding, soluble 1                                                                                                                                                                                                                     | Mm.43831.3                      | 7.9                                    | 9.5                                    | <b>2.88</b>                | 0.01             |
| 1449254_at    | Spp1          | secreted phosphoprotein 1                                                                                                                                                                                                                                | Mm.321.1                        | 8.8                                    | 10.3                                   | <b>2.83</b>                | 0.00             |
| 1418320_at    | Prss8         | protease, serine 8 (prostasin)                                                                                                                                                                                                                           | Mm.5875.1                       | 5.5                                    | 7.0                                    | <b>2.82</b>                | 0.01             |
| 1429947_a_at  | Zbp1          | Z-DNA binding protein 1                                                                                                                                                                                                                                  | Mm.116687.2                     | 6.1                                    | 7.6                                    | <b>2.82</b>                | 0.04             |
| 1452855_at    | Ly6k          | lymphocyte antigen 6 complex, locus K                                                                                                                                                                                                                    | Mm.46441.1                      | 4.8                                    | 6.3                                    | <b>2.77</b>                | 0.03             |
| 1426278_at    | Ifi2712a      | interferon, alpha-inducible protein 27 like 2A                                                                                                                                                                                                           | Mm.46382.1                      | 6.5                                    | 7.9                                    | <b>2.75</b>                | 0.02             |
| 1448259_at    | Fstl1         | follicle-stimulating-like 1                                                                                                                                                                                                                              | Mm.22763.1                      | 5.4                                    | 6.8                                    | <b>2.73</b>                | 0.00             |
| 1418355_at    | Nucb2         | nucleobindin 2                                                                                                                                                                                                                                           | Mm.9901.1                       | 5.8                                    | 7.3                                    | <b>2.72</b>                | 0.02             |
| 1455905_at    | 2610507B11Rik | RIKEN cDNA 2610507B11 gene                                                                                                                                                                                                                               | Mm.35854.3                      | 7.8                                    | 9.3                                    | <b>2.72</b>                | 0.00             |

**Supplemental Table 9. Significant differently expressed genes in 3bKI HCC samples**

| Affymetrix ID | Gene Symbol   | Description                                                                                      | Transcript ID<br>(Array Design) | 3aKO<br>avg<br>signal<br>log2<br>(n=4) | 3bKI<br>Avg<br>Signal<br>log2<br>(n=5) | Fold<br>Change<br>(linear) | ANOVA<br>p-value |
|---------------|---------------|--------------------------------------------------------------------------------------------------|---------------------------------|----------------------------------------|----------------------------------------|----------------------------|------------------|
| 1450407_a_at  | Anp32a        | acidic (leucine-rich) nuclear phosphoprotein 32 family, member A                                 | Mm.613.1                        | 7.8                                    | 9.3                                    | <b>2.71</b>                | 0.00             |
| 1438752_at    | A230058F20Rik | RIKEN cDNA A230058F20 gene                                                                       | Mm.74679.1                      | 3.5                                    | 4.9                                    | <b>2.7</b>                 | 0.00             |
| 1415698_at    | Golm1         | golgi membrane protein 1                                                                         | Mm.171335.1                     | 6.1                                    | 7.6                                    | <b>2.69</b>                | 0.03             |
| 1418949_at    | Gdf15         | growth differentiation factor 15                                                                 | Mm.31325.1                      | 7.2                                    | 8.6                                    | <b>2.67</b>                | 0.01             |
| 1434240_at    | 4632434I11Rik | DNA damage-induced apoptosis suppressor                                                          | Mm.26468.2                      | 3.3                                    | 4.7                                    | <b>2.66</b>                | 0.00             |
| 1417084_at    | Eif4ebp2      | eukaryotic translation initiation factor 4E binding protein 2                                    | Mm.140186.1                     | 8.9                                    | 10.3                                   | <b>2.64</b>                | 0.00             |
| 1417496_at    | Cp            | ceruloplasmin                                                                                    | Mm.13787.1                      | 11.7                                   | 13.1                                   | <b>2.64</b>                | 0.00             |
| 1449133_at    | Sprr1a        | small proline-rich protein 1A                                                                    | Mm.625.1                        | 4.8                                    | 6.2                                    | <b>2.64</b>                | 0.01             |
| 1419057_at    | Slc5a1        | solute carrier family 5 (sodium/glucose cotransporter), member 1                                 | Mm.25237.1                      | 4.7                                    | 6.1                                    | <b>2.63</b>                | 0.00             |
| 1444139_at    | Ddit4l        | DNA-damage-inducible transcript 4-like                                                           | Mm.205420.1                     | 5.0                                    | 6.4                                    | <b>2.63</b>                | 0.01             |
| 1450530_at    | B3galt1       | UDP-Gal:betaGlcNAc beta 1,3-galactosyltransferase, polypeptide 1                                 | Mm.57041.1                      | 6.3                                    | 7.7                                    | <b>2.63</b>                | 0.01             |
| 1455144_s_at  | Arhgap44      | Rho GTPase activating protein 44                                                                 | Mm.18455.1                      | 4.5                                    | 5.9                                    | <b>2.63</b>                | 0.01             |
| 1449153_at    | Mmp12         | matrix metalloproteinase 12                                                                      | Mm.2055.1                       | 4.1                                    | 5.5                                    | <b>2.62</b>                | 0.00             |
| 1419314_at    | Tinag         | tubulointerstitial nephritis antigen                                                             | Mm.23199.1                      | 3.8                                    | 5.1                                    | <b>2.61</b>                | 0.00             |
| 1415977_at    | Isyna1        | myo-inositol 1-phosphate synthase A1                                                             | Mm.29357.1                      | 7.5                                    | 8.9                                    | <b>2.59</b>                | 0.02             |
| 1418661_at    | Abhd2         | abhydrolase domain containing 2                                                                  | Mm.87337.1                      | 7.1                                    | 8.4                                    | <b>2.57</b>                | 0.01             |
| 1419573_a_at  | Lgals1        | lectin, galactose binding, soluble 1                                                             | Mm.43831.1                      | 8.2                                    | 9.6                                    | <b>2.56</b>                | 0.01             |
| 1423630_at    | Cygb          | cytoglobin                                                                                       | Mm.34598.1                      | 6.5                                    | 7.9                                    | <b>2.56</b>                | 0.02             |
| 1452035_at    | Col4a1        | collagen, type IV, alpha 1                                                                       | Mm.738.1                        | 8.1                                    | 9.5                                    | <b>2.56</b>                | 0.01             |
| 1416431_at    | Tubb6         | tubulin, beta 6 class V                                                                          | Mm.181860.1                     | 7.3                                    | 8.7                                    | <b>2.53</b>                | 0.00             |
| 1438207_at    | Gbf1          | golgi-specific brefeldin A-resistance factor 1                                                   | Mm.44823.1                      | 7.4                                    | 8.7                                    | <b>2.53</b>                | 0.00             |
| 1435012_x_at  | Cela3b        | chymotrypsin-like elastase family, member 3B; predicted gene 13011; uncharacterized LOC102641402 | Mm.30780.3                      | 2.5                                    | 3.8                                    | <b>2.52</b>                | 0.04             |
| 1425567_a_at  | Anxa5         | annexin A5                                                                                       | Mm.1620.2                       | 9.1                                    | 10.4                                   | <b>2.5</b>                 | 0.03             |
| 1427878_at    | Cystm1        | cysteine-rich transmembrane module containing 1                                                  | Mm.27841.1                      | 7.8                                    | 9.1                                    | <b>2.5</b>                 | 0.03             |
| 1448898_at    | Ccl9          | chemokine (C-C motif) ligand 9                                                                   | Mm.2271.1                       | 10.0                                   | 11.3                                   | <b>2.5</b>                 | 0.04             |
| 1451751_at    | Ddit4l        | DNA-damage-inducible transcript 4-like                                                           | Mm.195809.1                     | 4.8                                    | 6.1                                    | <b>2.49</b>                | 0.01             |
| 1423110_at    | Col1a2        | collagen, type I, alpha 2                                                                        | Mm.4482.1                       | 5.0                                    | 6.3                                    | <b>2.48</b>                | 0.01             |
| 1427386_at    | Arhgef16      | Rho guanine nucleotide exchange factor (GEF) 16                                                  | Mm.38481.1                      | 5.7                                    | 7.0                                    | <b>2.48</b>                | 0.00             |
| 1417822_at    | D17H6S56E-5   | DNA segment, Chr 17, human D6S56E 5                                                              | Mm.22506.1                      | 6.0                                    | 7.3                                    | <b>2.47</b>                | 0.04             |
| 1418655_at    | B4galnt1      | beta-1,4-N-acetyl-galactosaminyl transferase 1                                                   | Mm.1853.1                       | 4.6                                    | 5.9                                    | <b>2.46</b>                | 0.00             |

**Supplemental Table 9. Significant differently expressed genes in 3bKI HCC samples**

| Affymetrix ID | Gene Symbol   | Description                                                                                                                                    | Transcript ID<br>(Array Design) | 3aKO<br>avg<br>signal<br>log2<br>(n=4) | 3bKI<br>Avg<br>Signal<br>log2<br>(n=5) | Fold<br>Change<br>(linear) | ANOVA<br>p-value |
|---------------|---------------|------------------------------------------------------------------------------------------------------------------------------------------------|---------------------------------|----------------------------------------|----------------------------------------|----------------------------|------------------|
| 1440250_at    | Col4a4        | collagen, type IV, alpha 4                                                                                                                     | Mm.107258.1                     | 3.6                                    | 4.9                                    | <b>2.46</b>                | 0.02             |
| 1419004_s_at  | Bcl2a1a       | B cell leukemia/lymphoma 2 related protein A1a; B cell leukemia/lymphoma 2 related protein A1b; B cell leukemia/lymphoma 2 related protein A1d | Mm.196731.1                     | 4.9                                    | 6.2                                    | <b>2.44</b>                | 0.01             |
| 1426348_at    | Col4a1        | collagen, type IV, alpha 1                                                                                                                     | Mm.738.1                        | 7.3                                    | 8.5                                    | <b>2.44</b>                | 0.01             |
| 1417273_at    | Pdk4          | pyruvate dehydrogenase kinase, isoenzyme 4                                                                                                     | Mm.10283.1                      | 6.0                                    | 7.3                                    | <b>2.43</b>                | 0.00             |
| 1417268_at    | Cd14          | CD14 antigen                                                                                                                                   | Mm.3460.1                       | 7.3                                    | 8.5                                    | <b>2.41</b>                | 0.02             |
| 1418537_at    | Isoc2b        | isochorismatase domain containing 2b                                                                                                           | Mm.41385.1                      | 6.9                                    | 8.2                                    | <b>2.4</b>                 | 0.01             |
| 1419449_a_at  | Gnai2         | guanine nucleotide binding protein (G protein), alpha inhibiting 2                                                                             | Mm.196464.1                     | 8.6                                    | 9.8                                    | <b>2.4</b>                 | 0.00             |
| 1421550_a_at  | Trim34a       | tripartite motif-containing 34A; tripartite motif-containing 34B                                                                               | Mm.219657.1                     | 5.8                                    | 7.1                                    | <b>2.4</b>                 | 0.02             |
| 1430172_a_at  | Cyp4f16       | cytochrome P450, family 4, subfamily f, polypeptide 16; cytochrome P450, family 4, subfamily f, polypeptide 37                                 | Mm.30504.2                      | 6.1                                    | 7.4                                    | <b>2.4</b>                 | 0.01             |
| 1437432_a_at  | Trim12a       | tripartite motif-containing 12A                                                                                                                | Mm.26466.3                      | 3.0                                    | 4.2                                    | <b>2.39</b>                | 0.03             |
| 1417860_a_at  | Spon2         | spondin 2, extracellular matrix protein                                                                                                        | Mm.34694.1                      | 6.4                                    | 7.7                                    | <b>2.38</b>                | 0.01             |
| 1422587_at    | Tmem45a       | transmembrane protein 45a                                                                                                                      | Mm.4992.1                       | 5.4                                    | 6.6                                    | <b>2.37</b>                | 0.02             |
| 1433833_at    | Fndc3b        | fibronectin type III domain containing 3B                                                                                                      | Mm.200324.1                     | 9.5                                    | 10.7                                   | <b>2.37</b>                | 0.03             |
| 1426808_at    | Lgals3        | lectin, galactose binding, soluble 3                                                                                                           | Mm.2970.1                       | 7.9                                    | 9.2                                    | <b>2.36</b>                | 0.04             |
| 1422206_at    | B3galt1       | UDP-Gal:betaGlcNAc beta 1,3-galactosyltransferase, polypeptide 1                                                                               | Mm.57041.1                      | 5.9                                    | 7.1                                    | <b>2.35</b>                | 0.02             |
| 1424140_at    | Gale          | galactose-4-epimerase, UDP                                                                                                                     | Mm.20363.1                      | 7.5                                    | 8.7                                    | <b>2.35</b>                | 0.01             |
| 1429088_at    | Lbh           | limb-bud and heart                                                                                                                             | Mm.154109.1                     | 5.8                                    | 7.0                                    | <b>2.35</b>                | 0.01             |
| 1430190_at    | Ccdc30        | coiled-coil domain containing 30                                                                                                               | Mm.196069.1                     | 3.4                                    | 4.7                                    | <b>2.35</b>                | 0.01             |
| 1437019_at    | Fam25c        | family with sequence similarity 25, member C                                                                                                   | Mm.27156.1                      | 9.7                                    | 11.0                                   | <b>2.34</b>                | 0.04             |
| 1448694_at    | Jun           | jun proto-oncogene                                                                                                                             | Mm.482.1                        | 6.9                                    | 8.1                                    | <b>2.34</b>                | 0.00             |
| 1453304_s_at  | Ly6e          | lymphocyte antigen 6 complex, locus E                                                                                                          | Mm.204648.1                     | 11.9                                   | 13.1                                   | <b>2.34</b>                | 0.00             |
| 1423933_a_at  | 1600029D21Rik | placenta expressed transcript 1                                                                                                                | Mm.29959.1                      | 5.7                                    | 6.9                                    | <b>2.32</b>                | 0.00             |
| 1428671_at    | 2200002D01Rik | RIKEN cDNA 2200002D01 gene                                                                                                                     | Mm.46332.1                      | 7.6                                    | 8.8                                    | <b>2.32</b>                | 0.01             |
| 1430890_at    | Igsf23        | immunoglobulin superfamily, member 23                                                                                                          | Mm.158322.1                     | 5.1                                    | 6.3                                    | <b>2.32</b>                | 0.00             |
| 1448152_at    | Igf2          | insulin-like growth factor 2                                                                                                                   | Mm.3862.1                       | 5.6                                    | 6.8                                    | <b>2.32</b>                | 0.00             |
| 1434728_at    | Gria3         | glutamate receptor, ionotropic, AMPA3 (alpha 3)                                                                                                | Mm.32184.1                      | 2.8                                    | 4.0                                    | <b>2.31</b>                | 0.01             |
| 1436879_x_at  | Afp           | alpha fetoprotein                                                                                                                              | Mm.80.5                         | 2.7                                    | 3.9                                    | <b>2.3</b>                 | 0.00             |



**Supplemental Table 9. Significant differently expressed genes in 3bKI HCC samples**

| Affymetrix ID | Gene Symbol   | Description                                                                               | Transcript ID<br>(Array Design) | 3aKO<br>avg<br>signal<br>log2<br>(n=4) | 3bKI<br>Avg<br>Signal<br>log2<br>(n=5) | Fold<br>Change<br>(linear) | ANOVA<br>p-value |
|---------------|---------------|-------------------------------------------------------------------------------------------|---------------------------------|----------------------------------------|----------------------------------------|----------------------------|------------------|
| 1455162_at    | Ttc39a        | tetratricopeptide repeat domain 39A                                                       | Mm.23454.1                      | 6.3                                    | 7.5                                    | <b>2.3</b>                 | 0.00             |
| 1424594_at    | Samd4         | sterile alpha motif domain containing 4                                                   | Mm.20973.2                      | 6.2                                    | 7.4                                    | <b>2.28</b>                | 0.01             |
| 1438779_at    | Col4a3        | collagen, type IV, alpha 3                                                                | Mm.113295.1                     | 3.6                                    | 4.7                                    | <b>2.28</b>                | 0.01             |
| 1460351_at    | Gm12854       | predicted gene 12854; predicted gene 5068; S100 calcium binding protein A11 (calgizzarin) | Mm.175848.1                     | 8.1                                    | 9.2                                    | <b>2.28</b>                | 0.01             |
| 1436564_at    | Rims4         | regulating synaptic membrane exocytosis 4                                                 | Mm.131617.1                     | 6.7                                    | 7.9                                    | <b>2.27</b>                | 0.03             |
| 1448433_a_at  | Pcolce        | procollagen C-endopeptidase enhancer protein                                              | Mm.18808.1                      | 5.9                                    | 7.1                                    | <b>2.27</b>                | 0.01             |
| 1454254_s_at  | 1600029D21Rik | placenta expressed transcript 1                                                           | Mm.195522.1                     | 4.5                                    | 5.7                                    | <b>2.26</b>                | 0.00             |
| 1420378_at    | Sftpd         | surfactant associated protein D                                                           | Mm.1321.1                       | 5.6                                    | 6.8                                    | <b>2.25</b>                | 0.00             |
| 1419091_a_at  | Anxa2         | annexin A2                                                                                | Mm.584.1                        | 8.3                                    | 9.5                                    | <b>2.24</b>                | 0.00             |
| 1419820_at    | Pkhd1         | polycystic kidney and hepatic disease 1                                                   | Mm.198060.1                     | 5.3                                    | 6.5                                    | <b>2.24</b>                | 0.02             |
| 1449184_at    | Pglyrp1       | peptidoglycan recognition protein 1                                                       | Mm.21855.1                      | 4.5                                    | 5.7                                    | <b>2.24</b>                | 0.00             |
| 1417178_at    | Gipc2         | GIPC PDZ domain containing family, member 2                                               | Mm.97.1                         | 5.0                                    | 6.2                                    | <b>2.23</b>                | 0.01             |
| 1450857_a_at  | Col1a2        | collagen, type I, alpha 2                                                                 | Mm.4482.1                       | 8.3                                    | 9.4                                    | <b>2.2</b>                 | 0.00             |
| 1428066_at    | Ccdc120       | coiled-coil domain containing 120                                                         | Mm.59673.1                      | 4.3                                    | 5.5                                    | <b>2.19</b>                | 0.00             |
| 1423669_at    | Col1a1        | collagen, type I, alpha 1                                                                 | Mm.22621.1                      | 5.9                                    | 7.0                                    | <b>2.18</b>                | 0.00             |
| 1417500_a_at  | Tgm2          | transglutaminase 2, C polypeptide                                                         | Mm.18843.1                      | 10.7                                   | 11.8                                   | <b>2.17</b>                | 0.01             |
| 1452814_at    | Cpne3         | copine III                                                                                | Mm.38390.1                      | 7.6                                    | 8.7                                    | <b>2.16</b>                | 0.00             |
| 1455431_at    | Slc5a1        | solute carrier family 5 (sodium/glucose cotransporter), member 1                          | Mm.25237.2                      | 2.7                                    | 3.8                                    | <b>2.15</b>                | 0.00             |
| 1417836_at    | Gpx7          | glutathione peroxidase 7                                                                  | Mm.20164.1                      | 5.7                                    | 6.8                                    | <b>2.14</b>                | 0.01             |
| 1449024_a_at  | Hexa          | hexosaminidase A                                                                          | Mm.2284.1                       | 9.3                                    | 10.4                                   | <b>2.13</b>                | 0.04             |
| 1425764_a_at  | Bcat2         | branched chain aminotransferase 2, mitochondrial                                          | Mm.24210.2                      | 5.8                                    | 6.9                                    | <b>2.12</b>                | 0.01             |
| 1451431_a_at  | Dbnidd2       | dysbindin (dystrobrevin binding protein 1) domain containing 2                            | Mm.195525.1                     | 8.3                                    | 9.4                                    | <b>2.12</b>                | 0.00             |
| 1417936_at    | Ccl9          | chemokine (C-C motif) ligand 9                                                            | Mm.2271.1                       | 10.9                                   | 12.0                                   | <b>2.11</b>                | 0.04             |
| 1420699_at    | Clec7a        | C-type lectin domain family 7, member a                                                   | Mm.132943.1                     | 7.6                                    | 8.7                                    | <b>2.11</b>                | 0.05             |
| 1448469_at    | Nid1          | nidogen 1                                                                                 | Mm.4691.1                       | 6.5                                    | 7.6                                    | <b>2.11</b>                | 0.03             |
| 1451978_at    | Loxl1         | lysyl oxidase-like 1                                                                      | Mm.21049.1                      | 5.3                                    | 6.4                                    | <b>2.11</b>                | 0.05             |
| 1456981_at    | Tmc7          | transmembrane channel-like gene family 7                                                  | Mm.33000.1                      | 5.0                                    | 6.1                                    | <b>2.11</b>                | 0.02             |
| 1417389_at    | Gpc1          | glypican 1                                                                                | Mm.24193.1                      | 5.7                                    | 6.8                                    | <b>2.1</b>                 | 0.00             |
| 1424927_at    | Glipr1        | GLI pathogenesis-related 1 (glioma)                                                       | Mm.173790.1                     | 6.0                                    | 7.0                                    | <b>2.1</b>                 | 0.05             |
| 1438074_at    | Igsf23        | immunoglobulin superfamily, member 23                                                     | Mm.12097.1                      | 6.1                                    | 7.2                                    | <b>2.09</b>                | 0.01             |
| 1443941_at    | Ccdc149       | coiled-coil domain containing 149                                                         | Mm.86468.1                      | 4.7                                    | 5.7                                    | <b>2.08</b>                | 0.03             |
| 1445606_a_at  | 2900009J06Rik | RIKEN cDNA 2900009J06 gene                                                                | Mm.25735.1                      | 5.2                                    | 6.3                                    | <b>2.08</b>                | 0.01             |
| 1448393_at    | Cldn7         | claudin 7                                                                                 | Mm.42189.1                      | 4.6                                    | 5.7                                    | <b>2.08</b>                | 0.00             |

**Supplemental Table 9. Significant differently expressed genes in 3bKI HCC samples**

| Affymetrix ID | Gene Symbol | Description                                                               | Transcript ID<br>(Array Design) | 3aKO<br>avg<br>signal<br>log2<br>(n=4) | 3bKI<br>Avg<br>Signal<br>log2<br>(n=5) | Fold<br>Change<br>(linear) | ANOVA<br>p-value |
|---------------|-------------|---------------------------------------------------------------------------|---------------------------------|----------------------------------------|----------------------------------------|----------------------------|------------------|
| 1452956_a_at  | Ifi2711     | interferon, alpha-inducible protein 27                                    | Mm.2121.1                       | 10.4                                   | 11.4                                   | <b>2.08</b>                | 0.00             |
| 1448380_at    | Lgals3bp    | lectin, galactoside-binding, soluble, 3<br>binding protein                | Mm.3152.1                       | 9.3                                    | 10.4                                   | <b>2.07</b>                | 0.00             |
| 1439341_at    | Greb1l      | growth regulation by estrogen in<br>breast cancer-like                    | Mm.183863.1                     | 4.2                                    | 5.3                                    | <b>2.06</b>                | 0.01             |
| 1449221_a_at  | Rrbp1       | ribosome binding protein 1                                                | Mm.13705.1                      | 10.6                                   | 11.6                                   | <b>2.06</b>                | 0.02             |
| 1416072_at    | Cd34        | CD34 antigen                                                              | Mm.29798.1                      | 4.6                                    | 5.6                                    | <b>2.05</b>                | 0.03             |
| 1419157_at    | Sox4        | SRY (sex determining region Y)-box<br>4                                   | Mm.18789.1                      | 4.7                                    | 5.7                                    | <b>2.05</b>                | 0.00             |
| 1436061_at    |             |                                                                           | Mm.27610.1                      | 3.2                                    | 4.3                                    | <b>2.05</b>                | 0.01             |
| 1419156_at    | Sox4        | SRY (sex determining region Y)-box<br>4                                   | Mm.18789.1                      | 4.4                                    | 5.4                                    | <b>2.04</b>                | 0.00             |
| 1428640_at    | Hsf2bp      | heat shock transcription factor 2<br>binding protein                      | Mm.75856.1                      | 6.5                                    | 7.5                                    | <b>2.04</b>                | 0.01             |
| 1435758_at    | B4galt6     | UDP-Gal:betaGlcNAc beta 1,4-<br>galactosyltransferase, polypeptide 6      | Mm.26364.2                      | 5.4                                    | 6.4                                    | <b>2.04</b>                | 0.01             |
| 1441811_x_at  | Tmem176a    | transmembrane protein 176A                                                | Mm.200272.1                     | 10.6                                   | 11.7                                   | <b>2.04</b>                | 0.00             |
| 1443698_at    | Xaf1        | XIAP associated factor 1                                                  | Mm.149240.1                     | 7.6                                    | 8.6                                    | <b>2.04</b>                | 0.01             |
| 1448663_s_at  | Mvd         | mevalonate (diphospho)<br>decarboxylase                                   | Mm.28146.1                      | 8.2                                    | 9.3                                    | <b>2.04</b>                | 0.04             |
| 1428514_at    | Cpne3       | copine III                                                                | Mm.38390.1                      | 7.0                                    | 8.0                                    | <b>2.03</b>                | 0.00             |
| 1449007_at    | Btg3        | B cell translocation gene 3; B-cell<br>translocation gene 3 pseudogene    | Mm.2823.1                       | 6.1                                    | 7.1                                    | <b>2.03</b>                | 0.03             |
| 1423357_at    | Lipt2       | lipoyl(octanoyl) transferase 2<br>(putative)                              | Mm.46777.1                      | 6.7                                    | 7.7                                    | <b>2.02</b>                | 0.00             |
| 1424268_at    | Smox        | spermine oxidase                                                          | Mm.29763.1                      | 5.7                                    | 6.7                                    | <b>2.02</b>                | 0.04             |
| 1426628_at    | Tmem184c    | transmembrane protein 184C                                                | Mm.85137.1                      | 7.4                                    | 8.4                                    | <b>2.02</b>                | 0.01             |
| 1427137_at    | Ces2e       | carboxylesterase 2E                                                       | Mm.218630.1                     | 9.5                                    | 10.5                                   | <b>2.02</b>                | 0.02             |
| 1460086_at    |             |                                                                           | Mm.152571.1                     | 3.1                                    | 4.1                                    | <b>2.02</b>                | 0.00             |
| 1423505_at    | Tagln       | transgelin                                                                | Mm.2006.1                       | 7.1                                    | 8.1                                    | <b>2.01</b>                | 0.01             |
| 1424051_at    | Col4a2      | collagen, type IV, alpha 2                                                | Mm.181021.1                     | 7.5                                    | 8.5                                    | <b>2.01</b>                | 0.01             |
| 1431004_at    | Loxl2       | predicted gene, 21451; lysyl oxidase-<br>like 2                           | Mm.157089.1                     | 5.1                                    | 6.1                                    | <b>2.01</b>                | 0.01             |
| 1419059_at    | Apcs        | serum amyloid P-component                                                 | Mm.2165.1                       | 12.8                                   | 13.8                                   | <b>2</b>                   | 0.03             |
| 1419647_a_at  | Ier3        | immediate early response 3                                                | Mm.25613.1                      | 5.6                                    | 6.6                                    | <b>1.99</b>                | 0.02             |
| 1435950_at    | Hr          | hairless                                                                  | Mm.10225.3                      | 5.1                                    | 6.1                                    | <b>1.99</b>                | 0.00             |
| 1441137_at    | Bicc1       | bicaudal C homolog 1 (Drosophila)                                         | Mm.179033.1                     | 4.6                                    | 5.6                                    | <b>1.99</b>                | 0.01             |
| 1420965_a_at  | Enc1        | ectodermal-neural cortex 1                                                | Mm.30502.1                      | 6.6                                    | 7.6                                    | <b>1.98</b>                | 0.00             |
| 1426004_a_at  | Tgm2        | transglutaminase 2, C polypeptide                                         | Mm.18843.3                      | 9.0                                    | 10.0                                   | <b>1.98</b>                | 0.01             |
| 1435695_a_at  | Ggct        | gamma-glutamyl cyclotransferase                                           | Mm.27337.2                      | 7.8                                    | 8.8                                    | <b>1.98</b>                | 0.02             |
| 1416221_at    | Fstl1       | follicle-stimulating-like 1                                               | Mm.22763.1                      | 5.4                                    | 6.4                                    | <b>1.97</b>                | 0.00             |
| 1420911_a_at  | Mfge8       | milk fat globule-EGF factor 8 protein                                     | Mm.1451.1                       | 7.9                                    | 8.9                                    | <b>1.97</b>                | 0.00             |
| 1421106_at    | Jag1        | jagged 1                                                                  | Mm.87380.1                      | 3.7                                    | 4.6                                    | <b>1.97</b>                | 0.02             |
| 1423484_at    | Bicc1       | bicaudal C homolog 1 (Drosophila)                                         | Mm.46051.1                      | 6.0                                    | 7.0                                    | <b>1.97</b>                | 0.00             |
| 1426601_at    | Slc37a1     | solute carrier family 37 (glycerol-3-<br>phosphate transporter), member 1 | Mm.204968.1                     | 6.2                                    | 7.2                                    | <b>1.97</b>                | 0.04             |
| 1430574_at    | Cdkn3       | cyclin-dependent kinase inhibitor 3                                       | Mm.27224.1                      | 3.8                                    | 4.8                                    | <b>1.97</b>                | 0.05             |

**Supplemental Table 9. Significant differently expressed genes in 3bKI HCC samples**

| Affymetrix ID | Gene Symbol | Description                                                                                                  | Transcript ID<br>(Array Design) | 3aKO<br>avg<br>signal<br>log2<br>(n=4) | 3bKI<br>Avg<br>Signal<br>log2<br>(n=5) | Fold<br>Change<br>(linear) | ANOVA<br>p-value |
|---------------|-------------|--------------------------------------------------------------------------------------------------------------|---------------------------------|----------------------------------------|----------------------------------------|----------------------------|------------------|
| 1431591_s_at  | Gm9706      | predicted gene 9706; ISG15 ubiquitin-like modifier                                                           | Mm.204646.1                     | 6.3                                    | 7.3                                    | <b>1.97</b>                | 0.01             |
| 1424713_at    | Calml4      | calmodulin-like 4                                                                                            | Mm.28623.1                      | 5.9                                    | 6.9                                    | <b>1.96</b>                | 0.04             |
| 1424931_s_at  | Iglc1       | immunoglobulin lambda constant 1; immunoglobulin lambda variable 1                                           | Mm.780.1                        | 4.2                                    | 5.1                                    | <b>1.96</b>                | 0.04             |
| 1439407_x_at  | Tagln2      | transgelin 2                                                                                                 | Mm.22632.4                      | 6.5                                    | 7.4                                    | <b>1.96</b>                | 0.01             |
| 1452227_at    | Sel1l3      | sel-1 suppressor of lin-12-like 3 (C. elegans)                                                               | Mm.24656.1                      | 6.0                                    | 6.9                                    | <b>1.96</b>                | 0.03             |
| 1420013_s_at  | Lss         | lanosterol synthase                                                                                          | Mm.195350.1                     | 10.0                                   | 11.0                                   | <b>1.95</b>                | 0.02             |
| 1456733_x_at  | Serpinh1    | serine (or cysteine) peptidase inhibitor, clade H, member 1                                                  | Mm.22708.4                      | 6.3                                    | 7.3                                    | <b>1.95</b>                | 0.05             |
| 1420647_a_at  | Krt8        | keratin 8                                                                                                    | Mm.6800.1                       | 10.8                                   | 11.8                                   | <b>1.94</b>                | 0.00             |
| 1439773_at    | Ly6e        | lymphocyte antigen 6 complex, locus E                                                                        | Mm.45974.1                      | 6.7                                    | 7.6                                    | <b>1.94</b>                | 0.02             |
| 1415993_at    | Sqle        | squalene epoxidase                                                                                           | Mm.22663.1                      | 10.9                                   | 11.9                                   | <b>1.93</b>                | 0.02             |
| 1418075_at    | St6galnac4  | ST6 (alpha-N-acetyl-neuraminy-2,3-beta-galactosyl-1,3)-N-acetylgalactosaminide alpha-2,6-sialyltransferase 4 | Mm.27446.1                      | 5.9                                    | 6.8                                    | <b>1.93</b>                | 0.03             |
| 1418580_at    | Rtp4        | receptor transporter protein 4                                                                               | Mm.180157.1                     | 8.5                                    | 9.4                                    | <b>1.93</b>                | 0.04             |
| 1429570_at    | Mlkl        | mixed lineage kinase domain-like                                                                             | Mm.207971.1                     | 7.0                                    | 8.0                                    | <b>1.93</b>                | 0.02             |
| 1440447_at    | Abhd2       | abhydrolase domain containing 2                                                                              | Mm.214741.1                     | 5.5                                    | 6.5                                    | <b>1.93</b>                | 0.03             |
| 1416529_at    | Emp1        | epithelial membrane protein 1                                                                                | Mm.30024.1                      | 4.6                                    | 5.6                                    | <b>1.92</b>                | 0.01             |
| 1417303_at    | Mvd         | mevalonate (diphospho) decarboxylase                                                                         | Mm.28146.1                      | 8.0                                    | 9.0                                    | <b>1.92</b>                | 0.04             |
| 1449078_at    | St3gal6     | ST3 beta-galactoside alpha-2,3-sialyltransferase 6                                                           | Mm.100109.1                     | 6.1                                    | 7.0                                    | <b>1.92</b>                | 0.05             |
| 1450625_at    | Col5a2      | collagen, type V, alpha 2                                                                                    | Mm.10299.1                      | 3.4                                    | 4.3                                    | <b>1.92</b>                | 0.00             |
| 1453269_at    | Unc5b       | unc-5 homolog B (C. elegans)                                                                                 | Mm.29888.1                      | 5.2                                    | 6.2                                    | <b>1.92</b>                | 0.00             |
| 1428209_at    | Bex4        | brain expressed gene 4                                                                                       | Mm.14768.2                      | 3.2                                    | 4.2                                    | <b>1.91</b>                | 0.01             |
| 1449106_at    | Gpx3        | glutathione peroxidase 3                                                                                     | Mm.7156.1                       | 7.2                                    | 8.1                                    | <b>1.91</b>                | 0.03             |
| 1459589_at    | Cryl1       | crystallin, lambda 1                                                                                         | Mm.200251.1                     | 6.1                                    | 7.0                                    | <b>1.91</b>                | 0.00             |
| 1427451_a_at  | BC018473    | cDNA sequence BC018473                                                                                       | Mm.100084.1                     | 3.8                                    | 4.8                                    | <b>1.9</b>                 | 0.03             |
| 1438716_at    | Trim30d     | tripartite motif-containing 30D                                                                              | Mm.3288.3                       | 3.8                                    | 4.8                                    | <b>1.9</b>                 | 0.05             |
| 1448213_at    | Anxa1       | annexin A1                                                                                                   | Mm.14860.1                      | 7.5                                    | 8.4                                    | <b>1.9</b>                 | 0.04             |
| 1452360_a_at  | Kdm5a       | lysine (K)-specific demethylase 5A                                                                           | Mm.95879.2                      | 7.1                                    | 8.0                                    | <b>1.9</b>                 | 0.00             |
| 1423909_at    | Tmem176a    | transmembrane protein 176A                                                                                   | Mm.27061.1                      | 11.7                                   | 12.6                                   | <b>1.89</b>                | 0.00             |
| 1434758_at    | Crispld2    | cysteine-rich secretory protein LCCL domain containing 2                                                     | Mm.59441.1                      | 5.1                                    | 6.0                                    | <b>1.89</b>                | 0.01             |
| 1435653_at    | Abhd2       | abhydrolase domain containing 2                                                                              | Mm.161353.1                     | 10.3                                   | 11.2                                   | <b>1.89</b>                | 0.02             |
| 1417501_at    | Fbxo6       | F-box protein 6                                                                                              | Mm.27445.1                      | 8.6                                    | 9.5                                    | <b>1.88</b>                | 0.01             |
| 1423691_x_at  | Krt8        | keratin 8                                                                                                    | Mm.6800.2                       | 10.6                                   | 11.5                                   | <b>1.88</b>                | 0.00             |
| 1429527_a_at  | Plscr1      | phospholipid scramblase 1                                                                                    | Mm.14627.3                      | 5.7                                    | 6.7                                    | <b>1.88</b>                | 0.02             |
| 1415919_at    | Npdc1       | neural proliferation, differentiation and control 1                                                          | Mm.1131.1                       | 6.7                                    | 7.6                                    | <b>1.87</b>                | 0.00             |
| 1426123_a_at  | Rrbp1       | ribosome binding protein 1                                                                                   | Mm.13705.8                      | 9.3                                    | 10.2                                   | <b>1.87</b>                | 0.02             |
| 1427665_a_at  | Nfic        | nuclear factor I/C                                                                                           | Mm.5104.2                       | 6.7                                    | 7.6                                    | <b>1.87</b>                | 0.00             |

**Supplemental Table 9. Significant differently expressed genes in 3bKI HCC samples**

| <b>Affymetrix ID</b> | <b>Gene Symbol</b> | <b>Description</b>                                                                                      | <b>Transcript ID<br/>(Array Design)</b> | <b>3aKO<br/>avg<br/>signal<br/>log2<br/>(n=4)</b> | <b>3bKI<br/>Avg<br/>Signal<br/>log2<br/>(n=5)</b> | <b>Fold<br/>Change<br/>(linear)</b> | <b>ANOVA<br/>p-value</b> |
|----------------------|--------------------|---------------------------------------------------------------------------------------------------------|-----------------------------------------|---------------------------------------------------|---------------------------------------------------|-------------------------------------|--------------------------|
| 1450355_a_at         | Capg               | capping protein (actin filament),<br>gelsolin-like                                                      | Mm.18626.1                              | 6.1                                               | 7.0                                               | <b>1.87</b>                         | 0.01                     |
| 1441230_at           |                    |                                                                                                         | Mm.187354.1                             | 6.0                                               | 6.9                                               | <b>1.86</b>                         | 0.03                     |
| 1449360_at           | Csf2rb2            | colony stimulating factor 2 receptor,<br>beta 2, low-affinity (granulocyte-<br>macrophage)              | Mm.1940.1                               | 4.7                                               | 5.6                                               | <b>1.86</b>                         | 0.02                     |
| 1449363_at           | Atf3               | activating transcription factor 3                                                                       | Mm.2706.1                               | 6.2                                               | 7.0                                               | <b>1.86</b>                         | 0.02                     |
| 1460302_at           | Thbs1              | thrombospondin 1                                                                                        | Mm.4159.1                               | 4.2                                               | 5.1                                               | <b>1.86</b>                         | 0.02                     |
| 1416342_at           | Tnc                | tenascin C                                                                                              | Mm.980.1                                | 4.4                                               | 5.3                                               | <b>1.85</b>                         | 0.00                     |
| 1417837_at           | Phlda2             | pleckstrin homology-like domain,<br>family A, member 2                                                  | Mm.23697.1                              | 5.3                                               | 6.1                                               | <b>1.85</b>                         | 0.01                     |
| 1424754_at           | Ms4a7              | membrane-spanning 4-domains,<br>subfamily A, member 7                                                   | Mm.193094.1                             | 4.9                                               | 5.8                                               | <b>1.85</b>                         | 0.00                     |
| 1425810_a_at         | Csrp1              | cysteine and glycine-rich protein 1                                                                     | Mm.196484.2                             | 7.0                                               | 7.9                                               | <b>1.85</b>                         | 0.01                     |
| 1426805_at           | Smarca4            | SWI/SNF related, matrix associated,<br>actin dependent regulator of<br>chromatin, subfamily a, member 4 | Mm.200406.1                             | 7.0                                               | 7.8                                               | <b>1.85</b>                         | 0.00                     |
| 1437708_x_at         | Vamp3              | vesicle-associated membrane<br>protein 3                                                                | Mm.168744.4                             | 6.9                                               | 7.8                                               | <b>1.85</b>                         | 0.03                     |
| 1420017_at           | Tspan8             | tetraspanin 8                                                                                           | Mm.219820.1                             | 5.2                                               | 6.0                                               | <b>1.84</b>                         | 0.03                     |
| 1427347_s_at         | Tubb2a             | tubulin, beta 2A class IIA                                                                              | Mm.200858.1                             | 9.9                                               | 10.8                                              | <b>1.84</b>                         | 0.03                     |
| 1450641_at           | Vim                | vimentin                                                                                                | Mm.7.1                                  | 8.3                                               | 9.2                                               | <b>1.84</b>                         | 0.03                     |
| 1450661_x_at         | Nfic               | nuclear factor I/C                                                                                      | Mm.5104.1                               | 7.4                                               | 8.3                                               | <b>1.84</b>                         | 0.00                     |
| 1418069_at           | Apoc2              | apolipoprotein C-II                                                                                     | Mm.28394.1                              | 12.2                                              | 13.1                                              | <b>1.83</b>                         | 0.01                     |
| 1424245_at           | Ces2c              | carboxylesterase 2C;<br>carboxylesterase 2D, pseudogene                                                 | Mm.28191.1                              | 8.7                                               | 9.6                                               | <b>1.83</b>                         | 0.02                     |
| 1415961_at           | Itm2c              | integral membrane protein 2C                                                                            | Mm.29870.1                              | 9.4                                               | 10.3                                              | <b>1.82</b>                         | 0.02                     |
| 1416579_a_at         | Epcam              | epithelial cell adhesion molecule                                                                       | Mm.4259.1                               | 5.8                                               | 6.7                                               | <b>1.82</b>                         | 0.03                     |
| 1416646_at           | Afp                | alpha fetoprotein                                                                                       | Mm.80.1                                 | 5.5                                               | 6.4                                               | <b>1.82</b>                         | 0.01                     |
| 1417290_at           | Lrg1               | leucine-rich alpha-2-glycoprotein 1                                                                     | Mm.176946.1                             | 12.8                                              | 13.6                                              | <b>1.82</b>                         | 0.00                     |
| 1428936_at           | Atp2b1             | ATPase, Ca <sup>++</sup> transporting, plasma<br>membrane 1                                             | Mm.103450.1                             | 6.8                                               | 7.7                                               | <b>1.82</b>                         | 0.00                     |
| 1436722_a_at         | Actb               | actin, beta                                                                                             | Mm.297.2                                | 12.8                                              | 13.7                                              | <b>1.82</b>                         | 0.00                     |
| 1457047_at           |                    |                                                                                                         | Mm.151885.1                             | 4.8                                               | 5.6                                               | <b>1.82</b>                         | 0.00                     |
| 1421813_a_at         | Psap               | prosaposin                                                                                              | Mm.3363.1                               | 11.0                                              | 11.9                                              | <b>1.81</b>                         | 0.00                     |
| 1424704_at           | Runx2              | runt related transcription factor 2                                                                     | Mm.4509.1                               | 3.2                                               | 4.1                                               | <b>1.81</b>                         | 0.01                     |
| 1448281_a_at         | Cela2a             | chymotrypsin-like elastase family,<br>member 2A                                                         | Mm.21925.1                              | 4.5                                               | 5.4                                               | <b>1.81</b>                         | 0.01                     |
| 1436029_at           | Bicc1              | bicaudal C homolog 1 (Drosophila)                                                                       | Mm.25695.2                              | 6.3                                               | 7.1                                               | <b>1.8</b>                          | 0.00                     |
| 1453181_x_at         | Plscr1             | phospholipid scramblase 1                                                                               | Mm.14627.3                              | 6.1                                               | 7.0                                               | <b>1.8</b>                          | 0.02                     |
| 1418374_at           | Fxyd3              | FXDY domain-containing ion<br>transport regulator 3                                                     | Mm.1662.1                               | 5.8                                               | 6.6                                               | <b>1.79</b>                         | 0.01                     |
| 1422916_at           | Fgf21              | fibroblast growth factor 21                                                                             | Mm.143736.1                             | 6.5                                               | 7.4                                               | <b>1.79</b>                         | 0.04                     |
| 1437633_at           | Ankrd11            | ankyrin repeat domain 11                                                                                | Mm.41929.2                              | 7.3                                               | 8.1                                               | <b>1.79</b>                         | 0.00                     |
| 1450061_at           | Enc1               | ectodermal-neural cortex 1                                                                              | Mm.30502.1                              | 6.4                                               | 7.2                                               | <b>1.79</b>                         | 0.00                     |

**Supplemental Table 9. Significant differently expressed genes in 3bKI HCC samples**

| Affymetrix ID | Gene Symbol | Description                                                                              | Transcript ID<br>(Array Design) | 3aKO<br>avg<br>signal<br>log2<br>(n=4) | 3bKI<br>Avg<br>Signal<br>log2<br>(n=5) | Fold<br>Change<br>(linear) | ANOVA<br>p-value |
|---------------|-------------|------------------------------------------------------------------------------------------|---------------------------------|----------------------------------------|----------------------------------------|----------------------------|------------------|
| 1450541_at    | Pvt1        | plasmacytoma variant translocation 1                                                     | Mm.4608.1                       | 4.8                                    | 5.6                                    | <b>1.79</b>                | 0.00             |
| 1417392_a_at  | Slc7a7      | solute carrier family 7 (cationic amino acid transporter, y+ system), member 7           | Mm.142455.1                     | 7.4                                    | 8.2                                    | <b>1.78</b>                | 0.04             |
| 1418004_a_at  | Tmem176b    | transmembrane protein 176B                                                               | Mm.28385.1                      | 11.8                                   | 12.6                                   | <b>1.78</b>                | 0.00             |
| 1418280_at    | Klf6        | Kruppel-like factor 6                                                                    | Mm.196627.1                     | 5.2                                    | 6.0                                    | <b>1.78</b>                | 0.02             |
| 1450562_at    | Ly6f        | lymphocyte antigen 6 complex, locus F                                                    | Mm.57179.1                      | 4.0                                    | 4.8                                    | <b>1.78</b>                | 0.00             |
| 1420991_at    | Ankrd1      | ankyrin repeat domain 1 (cardiac muscle)                                                 | Mm.10279.1                      | 3.9                                    | 4.7                                    | <b>1.77</b>                | 0.02             |
| 1421504_at    | Sp4         | trans-acting transcription factor 4                                                      | Mm.5073.1                       | 5.7                                    | 6.6                                    | <b>1.77</b>                | 0.00             |
| 1423549_at    | Slc1a4      | solute carrier family 1 (glutamate/neutral amino acid transporter), member 4             | Mm.6379.1                       | 5.9                                    | 6.7                                    | <b>1.77</b>                | 0.00             |
| 1425182_x_at  | Klk1b22     | kallikrein 1-related peptidase b22; kallikrein 1-related peptidase b9                    | Mm.200410.1                     | 6.0                                    | 6.8                                    | <b>1.77</b>                | 0.03             |
| 1427683_at    | Egr2        | early growth response 2                                                                  | Mm.1353.2                       | 3.3                                    | 4.2                                    | <b>1.77</b>                | 0.03             |
| 1439566_at    | Gprn3       | GPRIN family member 3                                                                    | Mm.138080.1                     | 6.6                                    | 7.5                                    | <b>1.77</b>                | 0.04             |
| 1416103_at    | Ywhaz       | tyrosine 3-monooxygenase/tryptophan 5-monooxygenase activation protein, zeta polypeptide | Mm.3360.1                       | 7.7                                    | 8.5                                    | <b>1.76</b>                | 0.02             |
| 1416521_at    | Sepw1       | selenoprotein W, muscle 1                                                                | Mm.42829.1                      | 8.8                                    | 9.6                                    | <b>1.76</b>                | 0.03             |
| 1429159_at    | Itih5       | inter-alpha (globulin) inhibitor H5                                                      | Mm.2935.1                       | 5.9                                    | 6.7                                    | <b>1.76</b>                | 0.02             |
| 1437277_x_at  | Tgm2        | transglutaminase 2, C polypeptide                                                        | Mm.18843.7                      | 10.8                                   | 11.7                                   | <b>1.76</b>                | 0.02             |
| 1448169_at    | Krt18       | keratin 18                                                                               | Mm.22479.1                      | 11.4                                   | 12.2                                   | <b>1.76</b>                | 0.02             |
| 1416410_at    | Pafah1b3    | platelet-activating factor acetylhydrolase, isoform 1b, subunit 3                        | Mm.597.1                        | 6.1                                    | 6.9                                    | <b>1.75</b>                | 0.02             |
| 1416443_a_at  | Sae1        | SUMO1 activating enzyme subunit 1                                                        | Mm.29698.1                      | 9.3                                    | 10.2                                   | <b>1.75</b>                | 0.00             |
| 1418499_a_at  | Kcne3       | potassium voltage-gated channel, Isk-related subfamily, gene 3                           | Mm.18733.1                      | 2.8                                    | 3.6                                    | <b>1.75</b>                | 0.00             |
| 1422912_at    | Bmp4        | bone morphogenetic protein 4                                                             | Mm.6813.1                       | 6.6                                    | 7.4                                    | <b>1.75</b>                | 0.03             |
| 1426366_at    | Ago2        | argonate RISC catalytic subunit 2                                                        | Mm.26266.1                      | 7.0                                    | 7.8                                    | <b>1.75</b>                | 0.00             |
| 1435611_x_at  | Cela3b      | chymotrypsin-like elastase family, member 3B                                             | Mm.30780.4                      | 5.1                                    | 6.0                                    | <b>1.75</b>                | 0.03             |
| 1436890_at    | Uap111      | UDP-N-acteylglucosamine pyrophosphorylase 1-like 1                                       | Mm.33797.2                      | 6.9                                    | 7.7                                    | <b>1.75</b>                | 0.01             |
| 1438133_a_at  | Cyr61       | cysteine rich protein 61                                                                 | Mm.1231.2                       | 6.3                                    | 7.1                                    | <b>1.75</b>                | 0.00             |
| 1418263_at    | Ddx25       | DEAD (Asp-Glu-Ala-Asp) box polypeptide 25                                                | Mm.45108.1                      | 4.7                                    | 5.5                                    | <b>1.74</b>                | 0.00             |
| 1434241_at    | Wdr67       | TBC1 domain family, member 31                                                            | Mm.31972.1                      | 7.3                                    | 8.1                                    | <b>1.74</b>                | 0.00             |
| 1449984_at    | Cxcl2       | chemokine (C-X-C motif) ligand 2                                                         | Mm.4979.1                       | 3.4                                    | 4.2                                    | <b>1.74</b>                | 0.03             |
| 1460330_at    | Anxa3       | annexin A3                                                                               | Mm.7214.1                       | 6.6                                    | 7.4                                    | <b>1.74</b>                | 0.04             |

**Supplemental Table 9. Significant differently expressed genes in 3bKI HCC samples**

| Affymetrix ID | Gene Symbol   | Description                                                                                                           | Transcript ID<br>(Array Design) | 3aKO<br>avg<br>signal<br>log2<br>(n=4) | 3bKI<br>Avg<br>Signal<br>log2<br>(n=5) | Fold<br>Change<br>(linear) | ANOVA<br>p-value |
|---------------|---------------|-----------------------------------------------------------------------------------------------------------------------|---------------------------------|----------------------------------------|----------------------------------------|----------------------------|------------------|
| 1416028_a_at  | Hn1           | hematological and neurological expressed sequence 1                                                                   | Mm.1775.1                       | 6.9                                    | 7.7                                    | <b>1.73</b>                | 0.02             |
| 1424131_at    | Col6a3        | collagen, type VI, alpha 3                                                                                            | Mm.7562.1                       | 6.8                                    | 7.6                                    | <b>1.73</b>                | 0.01             |
| 1436539_at    | Clmn          | calmin                                                                                                                | Mm.22921.1                      | 6.3                                    | 7.1                                    | <b>1.73</b>                | 0.00             |
| 1442439_at    | W91776        | expressed sequence W91776                                                                                             | Mm.34265.1                      | 4.2                                    | 5.0                                    | <b>1.73</b>                | 0.03             |
| 1444182_at    | Igsf23        | immunoglobulin superfamily, member 23                                                                                 | Mm.98583.1                      | 4.1                                    | 4.8                                    | <b>1.73</b>                | 0.04             |
| 1460227_at    | Timp1         | tissue inhibitor of metalloproteinase 1                                                                               | Mm.8245.1                       | 4.6                                    | 5.4                                    | <b>1.73</b>                | 0.00             |
| 1418073_at    | Acot9         | acyl-CoA thioesterase 9                                                                                               | Mm.23368.1                      | 6.6                                    | 7.3                                    | <b>1.72</b>                | 0.04             |
| 1430964_at    | 2310034O05Rik | RIKEN cDNA 2310034O05 gene                                                                                            | Mm.58173.1                      | 3.8                                    | 4.6                                    | <b>1.72</b>                | 0.03             |
| 1450295_s_at  | Pvr           | poliovirus receptor                                                                                                   | Mm.8071.1                       | 4.0                                    | 4.8                                    | <b>1.72</b>                | 0.00             |
| 1423418_at    | Fdps          | farnesyl diphosphate synthetase                                                                                       | Mm.39472.1                      | 12.0                                   | 12.8                                   | <b>1.71</b>                | 0.03             |
| 1423547_at    | Lyz2          | lysozyme 2                                                                                                            | Mm.45436.1                      | 10.2                                   | 11.0                                   | <b>1.71</b>                | 0.01             |
| 1423550_at    | Slc1a4        | solute carrier family 1 (glutamate/neutral amino acid transporter), member 4                                          | Mm.6379.1                       | 6.5                                    | 7.3                                    | <b>1.71</b>                | 0.00             |
| 1424612_at    | Nipal2        | NIPA-like domain containing 2                                                                                         | Mm.179043.1                     | 4.6                                    | 5.4                                    | <b>1.71</b>                | 0.01             |
| 1425603_at    | Tmem176a      | transmembrane protein 176A                                                                                            | Mm.153276.1                     | 10.5                                   | 11.3                                   | <b>1.71</b>                | 0.02             |
| 1425811_a_at  | Csrp1         | cysteine and glycine-rich protein 1                                                                                   | Mm.196484.2                     | 7.6                                    | 8.3                                    | <b>1.71</b>                | 0.03             |
| 1426964_at    | Abrac1        | ABRA C-terminal like; predicted pseudogene 6314                                                                       | Mm.28149.1                      | 8.7                                    | 9.5                                    | <b>1.71</b>                | 0.04             |
| 1434027_at    | Rcan3         | regulator of calcineurin 3                                                                                            | Mm.11946.2                      | 5.2                                    | 6.0                                    | <b>1.71</b>                | 0.02             |
| 1435650_at    | Hapln4        | hyaluronan and proteoglycan link protein 4                                                                            | Mm.152048.1                     | 7.4                                    | 8.2                                    | <b>1.71</b>                | 0.03             |
| 1435989_x_at  | Krt8          | keratin 8                                                                                                             | Mm.6800.3                       | 10.5                                   | 11.3                                   | <b>1.71</b>                | 0.00             |
| 1438322_x_at  | Fdft1         | farnesyl diphosphate farnesyl transferase 1                                                                           | Mm.3204.3                       | 10.3                                   | 11.1                                   | <b>1.71</b>                | 0.03             |
| 1416164_at    | Fbln5         | fibulin 5                                                                                                             | Mm.25347.1                      | 7.0                                    | 7.8                                    | <b>1.7</b>                 | 0.01             |
| 1416498_at    | Ppic          | peptidylprolyl isomerase C                                                                                            | Mm.4587.1                       | 6.0                                    | 6.8                                    | <b>1.7</b>                 | 0.04             |
| 1416501_at    | Pdpc1         | 3-phosphoinositide dependent protein kinase 1                                                                         | Mm.10504.1                      | 7.2                                    | 8.0                                    | <b>1.7</b>                 | 0.00             |
| 1416589_at    | Sparc         | secreted acidic cysteine rich glycoprotein                                                                            | Mm.35439.1                      | 9.8                                    | 10.6                                   | <b>1.7</b>                 | 0.05             |
| 1428626_at    | Lysmd2        | LysM, putative peptidoglycan-binding, domain containing 2                                                             | Mm.19119.1                      | 5.9                                    | 6.7                                    | <b>1.7</b>                 | 0.03             |
| 1433428_x_at  | Tgm2          | transglutaminase 2, C polypeptide                                                                                     | Mm.18843.4                      | 10.6                                   | 11.4                                   | <b>1.7</b>                 | 0.02             |
| 1433507_a_at  | Gm6750        | predicted gene 6750; predicted pseudogene 7931; predicted gene 9525; high mobility group nucleosomal binding domain 2 | Mm.911.2                        | 9.2                                    | 9.9                                    | <b>1.7</b>                 | 0.04             |
| 1434089_at    | Synpo         | synaptopodin                                                                                                          | Mm.27313.1                      | 5.2                                    | 6.0                                    | <b>1.7</b>                 | 0.03             |
| 1435936_at    | Slc13a5       | solute carrier family 13 (sodium-dependent citrate transporter), member 5                                             | Mm.30956.1                      | 6.4                                    | 7.2                                    | <b>1.7</b>                 | 0.04             |
| 1436996_x_at  | Lyz1          | lysozyme 1                                                                                                            | Mm.45436.2                      | 10.8                                   | 11.5                                   | <b>1.7</b>                 | 0.01             |
| 1441042_at    | Fgf1          | fibroblast growth factor 1                                                                                            | Mm.139120.1                     | 5.8                                    | 6.6                                    | <b>1.7</b>                 | 0.01             |

**Supplemental Table 9. Significant differently expressed genes in 3bKI HCC samples**

| Affymetrix ID | Gene Symbol | Description                                                                                                                                                   | Transcript ID<br>(Array Design) | 3aKO<br>avg<br>signal<br>log2<br>(n=4) | 3bKI<br>Avg<br>Signal<br>log2<br>(n=5) | Fold<br>Change<br>(linear) | ANOVA<br>p-value |
|---------------|-------------|---------------------------------------------------------------------------------------------------------------------------------------------------------------|---------------------------------|----------------------------------------|----------------------------------------|----------------------------|------------------|
| 1444774_at    | Det1        | de-etiolated homolog 1 (Arabidopsis)                                                                                                                          | Mm.218272.1                     | 5.7                                    | 6.4                                    | 1.7                        | 0.04             |
| 1451230_a_at  | Wbp5        | WW domain binding protein 5                                                                                                                                   | Mm.512.1                        | 9.6                                    | 10.4                                   | 1.7                        | 0.03             |
| 1417087_at    | Glg1        | golgi apparatus protein 1                                                                                                                                     | Mm.488.1                        | 8.2                                    | 9.0                                    | 1.69                       | 0.05             |
| 1417399_at    | Gas6        | growth arrest specific 6                                                                                                                                      | Mm.3982.1                       | 9.0                                    | 9.7                                    | 1.69                       | 0.04             |
| 1417971_at    | Nrm         | nurim (nuclear envelope membrane protein)                                                                                                                     | Mm.18478.1                      | 4.7                                    | 5.4                                    | 1.69                       | 0.01             |
| 1419100_at    | Serpina3n   | serine (or cysteine) peptidase inhibitor, clade A, member 3N                                                                                                  | Mm.22650.1                      | 11.1                                   | 11.9                                   | 1.69                       | 0.00             |
| 1419838_s_at  | Plk4        | polo-like kinase 4                                                                                                                                            | Mm.198533.1                     | 4.0                                    | 4.8                                    | 1.69                       | 0.01             |
| 1427002_s_at  | Arsg        | arylsulfatase G                                                                                                                                               | Mm.41370.1                      | 7.5                                    | 8.3                                    | 1.69                       | 0.02             |
| 1429139_at    | Otud7b      | OTU domain containing 7B                                                                                                                                      | Mm.3050.1                       | 6.8                                    | 7.6                                    | 1.69                       | 0.01             |
| 1435902_at    | Nudt18      | nudix (nucleoside diphosphate linked moiety X)-type motif 18                                                                                                  | Mm.34191.1                      | 8.2                                    | 8.9                                    | 1.69                       | 0.01             |
| 1439041_at    | Slc39a10    | solute carrier family 39 (zinc transporter), member 10                                                                                                        | Mm.215090.1                     | 4.9                                    | 5.6                                    | 1.69                       | 0.02             |
| 1448130_at    | Fdft1       | farnesyl diphosphate farnesyl transferase 1                                                                                                                   | Mm.3204.1                       | 10.7                                   | 11.5                                   | 1.69                       | 0.02             |
| 1448207_at    | Lasp1       | LIM and SH3 protein 1                                                                                                                                         | Mm.200673.1                     | 7.4                                    | 8.1                                    | 1.69                       | 0.01             |
| 1448710_at    | Cxcr4       | chemokine (C-X-C motif) receptor 4                                                                                                                            | Mm.1401.1                       | 3.8                                    | 4.6                                    | 1.69                       | 0.00             |
| 1415836_at    | Aldh18a1    | aldehyde dehydrogenase 18 family, member A1                                                                                                                   | Mm.29751.1                      | 5.0                                    | 5.7                                    | 1.68                       | 0.00             |
| 1415890_at    | Papss1      | 3'-phosphoadenosine 5'-phosphosulfate synthase 1                                                                                                              | Mm.18161.1                      | 8.2                                    | 9.0                                    | 1.68                       | 0.00             |
| 1416407_at    | Pea15a      | phosphoprotein enriched in astrocytes 15A                                                                                                                     | Mm.544.1                        | 7.8                                    | 8.6                                    | 1.68                       | 0.02             |
| 1417116_at    | Slc6a8      | solute carrier family 6 (neurotransmitter transporter, creatine), member 8                                                                                    | Mm.41401.1                      | 6.2                                    | 6.9                                    | 1.68                       | 0.02             |
| 1417379_at    | Iqgap1      | IQ motif containing GTPase activating protein 1                                                                                                               | Mm.56685.1                      | 7.6                                    | 8.4                                    | 1.68                       | 0.04             |
| 1423141_at    | Lipa        | lysosomal acid lipase A                                                                                                                                       | Mm.181935.1                     | 9.3                                    | 10.1                                   | 1.68                       | 0.00             |
| 1429745_at    | DXBay18     | DNA segment, Chr X, Baylor 18; predicted gene 14685; predicted pseudogene 5639; predicted gene 5640; predicted gene 5936                                      | Mm.5154.2                       | 3.0                                    | 3.7                                    | 1.68                       | 0.00             |
| 1433446_at    | Hmgcs1      | 3-hydroxy-3-methylglutaryl-Coenzyme A synthase 1                                                                                                              | Mm.61526.4                      | 11.2                                   | 12.0                                   | 1.68                       | 0.01             |
| 1435792_at    | Csprs       | component of Sp100-rs; predicted pseudogene 15433; predicted gene 2666; predicted pseudogene 7609; uncharacterized LOC100041903; uncharacterized LOC100503923 | Mm.99965.2                      | 6.8                                    | 7.5                                    | 1.68                       | 0.03             |
| 1448229_s_at  | Ccnd2       | cyclin D2                                                                                                                                                     | Mm.3141.1                       | 4.8                                    | 5.5                                    | 1.68                       | 0.01             |
| 1417225_at    | Arl6ip5     | ADP-ribosylation factor-like 6 interacting protein 5                                                                                                          | Mm.30009.1                      | 9.3                                    | 10.0                                   | 1.67                       | 0.01             |

**Supplemental Table 9. Significant differently expressed genes in 3bKI HCC samples**

| Affymetrix ID | Gene Symbol   | Description                                                                      | Transcript ID<br>(Array Design) | 3aKO<br>avg<br>signal<br>log2<br>(n=4) | 3bKI<br>Avg<br>Signal<br>log2<br>(n=5) | Fold<br>Change<br>(linear) | ANOVA<br>p-value |
|---------------|---------------|----------------------------------------------------------------------------------|---------------------------------|----------------------------------------|----------------------------------------|----------------------------|------------------|
| 1418517_at    | Irx3          | Iroquois related homeobox 3                                                      | Mm.39039.1                      | 4.8                                    | 5.5                                    | <b>1.67</b>                | 0.01             |
| 1418711_at    | Pdgfa         | platelet derived growth factor, alpha                                            | Mm.2675.1                       | 6.6                                    | 7.3                                    | <b>1.67</b>                | 0.00             |
| 1425911_a_at  | Fgfr1         | fibroblast growth factor receptor 1                                              | Mm.3157.3                       | 4.6                                    | 5.3                                    | <b>1.67</b>                | 0.01             |
| 1436902_x_at  | Tmsb10        | thymosin, beta 10                                                                | Mm.3532.5                       | 8.2                                    | 8.9                                    | <b>1.67</b>                | 0.03             |
| 1448429_at    | Gyg           | glycogenin                                                                       | Mm.6375.1                       | 6.6                                    | 7.3                                    | <b>1.67</b>                | 0.03             |
| 1454757_s_at  | Ifi2711       | interferon, alpha-inducible protein 27                                           | Mm.2121.2                       | 10.3                                   | 11.0                                   | <b>1.67</b>                | 0.01             |
| 1416726_s_at  | Ube2s         | ubiquitin-conjugating enzyme E2S                                                 | Mm.22491.1                      | 9.3                                    | 10.1                                   | <b>1.66</b>                | 0.02             |
| 1418136_at    | Tgfb1i1       | transforming growth factor beta 1<br>induced transcript 1                        | Mm.3248.1                       | 6.5                                    | 7.2                                    | <b>1.66</b>                | 0.00             |
| 1418760_at    | Rdh11         | retinol dehydrogenase 11                                                         | Mm.219462.1                     | 9.0                                    | 9.7                                    | <b>1.66</b>                | 0.04             |
| 1423406_at    | Sv2a          | synaptic vesicle glycoprotein 2 a                                                | Mm.200365.1                     | 5.6                                    | 6.4                                    | <b>1.66</b>                | 0.01             |
| 1423584_at    | Igfbp7        | insulin-like growth factor binding<br>protein 7                                  | Mm.534.1                        | 11.1                                   | 11.8                                   | <b>1.66</b>                | 0.00             |
| 1426434_at    | Tmem43        | transmembrane protein 43                                                         | Mm.38801.1                      | 7.3                                    | 8.0                                    | <b>1.66</b>                | 0.02             |
| 1432579_at    | Rsph3a        | radial spoke 3A homolog<br>(Chlamydomonas)                                       | Mm.159766.1                     | 5.1                                    | 5.8                                    | <b>1.66</b>                | 0.00             |
| 1437185_s_at  | Tmsb10        | thymosin, beta 10                                                                | Mm.3532.6                       | 10.3                                   | 11.0                                   | <b>1.66</b>                | 0.03             |
| 1437536_at    | Fkrp          | fukutin related protein                                                          | Mm.39703.1                      | 5.8                                    | 6.6                                    | <b>1.66</b>                | 0.00             |
| 1439178_at    | Adrbk2        | adrenergic receptor kinase, beta 2                                               | Mm.153148.1                     | 6.0                                    | 6.8                                    | <b>1.66</b>                | 0.04             |
| 1447043_at    |               |                                                                                  | Mm.127541.1                     | 3.1                                    | 3.8                                    | <b>1.66</b>                | 0.00             |
| 1453238_s_at  | A130040M12Rik | RIKEN cDNA 3930401B19 gene                                                       | Mm.196616.1                     | 11.5                                   | 12.3                                   | <b>1.66</b>                | 0.04             |
| 1456230_at    | 4933422H20Rik | RIKEN cDNA 4933422H20 gene                                                       | Mm.50902.1                      | 5.2                                    | 5.9                                    | <b>1.66</b>                | 0.01             |
| 1419665_a_at  | Nupr1         | nuclear protein transcription<br>regulator 1                                     | Mm.18742.1                      | 5.4                                    | 6.1                                    | <b>1.65</b>                | 0.03             |
| 1421424_a_at  | Anpep         | alanyl (membrane) aminopeptidase                                                 | Mm.4487.1                       | 8.8                                    | 9.5                                    | <b>1.65</b>                | 0.01             |
| 1424186_at    | Ccdc80        | coiled-coil domain containing 80                                                 | Mm.181074.1                     | 8.2                                    | 9.0                                    | <b>1.65</b>                | 0.02             |
| 1428705_at    | 1700007K13Rik | RIKEN cDNA 1700007K13 gene                                                       | Mm.46470.1                      | 3.4                                    | 4.2                                    | <b>1.65</b>                | 0.01             |
| 1429233_at    | Sept11        | septin 11                                                                        | Mm.27384.1                      | 8.0                                    | 8.7                                    | <b>1.65</b>                | 0.00             |
| 1434788_at    | Fzd3          | frizzled homolog 3 (Drosophila)                                                  | Mm.115175.1                     | 3.8                                    | 4.5                                    | <b>1.65</b>                | 0.03             |
| 1448596_at    | Slc6a8        | solute carrier family 6<br>(neurotransmitter transporter,<br>creatine), member 8 | Mm.41401.1                      | 5.9                                    | 6.7                                    | <b>1.65</b>                | 0.01             |
| 1448619_at    | Dhcr7         | 7-dehydrocholesterol reductase                                                   | Mm.182149.1                     | 10.1                                   | 10.8                                   | <b>1.65</b>                | 0.01             |
| 1449187_at    | Pdgfa         | platelet derived growth factor, alpha                                            | Mm.2675.1                       | 6.8                                    | 7.5                                    | <b>1.65</b>                | 0.00             |
| 1460259_s_at  | Clca1         | chloride channel calcium activated 1;<br>chloride channel calcium activated 2    | Mm.20897.1                      | 6.2                                    | 6.9                                    | <b>1.65</b>                | 0.04             |
| 1418929_at    | Ift57         | intraflagellar transport 57                                                      | Mm.31355.1                      | 6.2                                    | 7.0                                    | <b>1.64</b>                | 0.02             |
| 1426529_a_at  | Tagln2        | transgelin 2                                                                     | Mm.22632.1                      | 8.1                                    | 8.8                                    | <b>1.64</b>                | 0.00             |
| 1426774_at    | Parp12        | poly (ADP-ribose) polymerase family,<br>member 12                                | Mm.29894.1                      | 8.6                                    | 9.3                                    | <b>1.64</b>                | 0.05             |
| 1428420_a_at  | Exoc3l4       | exocyst complex component 3-like 4                                               | Mm.28857.1                      | 5.5                                    | 6.2                                    | <b>1.64</b>                | 0.01             |
| 1448333_at    | Adprh         | ADP-ribosylarginine hydrolase                                                    | Mm.20047.1                      | 7.5                                    | 8.2                                    | <b>1.64</b>                | 0.02             |
| 1448424_at    | Frzb          | frizzled-related protein                                                         | Mm.3246.1                       | 4.0                                    | 4.7                                    | <b>1.64</b>                | 0.01             |
| 1451680_at    | Srxn1         | sulfiredoxin 1 homolog (S.<br>cerevisiae)                                        | Mm.181594.1                     | 8.9                                    | 9.6                                    | <b>1.64</b>                | 0.00             |



**Supplemental Table 9. Significant differently expressed genes in 3bKI HCC samples**

| Affymetrix ID | Gene Symbol | Description                                                                                 | Transcript ID<br>(Array Design) | 3aKO<br>avg<br>signal<br>log2<br>(n=4) | 3bKI<br>Avg<br>Signal<br>log2<br>(n=5) | Fold<br>Change<br>(linear) | ANOVA<br>p-value |
|---------------|-------------|---------------------------------------------------------------------------------------------|---------------------------------|----------------------------------------|----------------------------------------|----------------------------|------------------|
| 1455390_at    | Alkbh6      | alkB, alkylation repair homolog 6 (E. coli)                                                 | Mm.40726.1                      | 7.3                                    | 8.0                                    | <b>1.64</b>                | 0.01             |
| 1455900_x_at  | Tgm2        | transglutaminase 2, C polypeptide                                                           | Mm.18843.6                      | 9.9                                    | 10.6                                   | <b>1.64</b>                | 0.02             |
| 1415806_at    | Plat        | plasminogen activator, tissue                                                               | Mm.154660.1                     | 4.9                                    | 5.6                                    | <b>1.63</b>                | 0.00             |
| 1416222_at    | Nsdhl       | NAD(P) dependent steroid dehydrogenase-like                                                 | Mm.38792.1                      | 11.1                                   | 11.8                                   | <b>1.63</b>                | 0.01             |
| 1418184_at    | Cenpm       | centromere protein M                                                                        | Mm.23596.1                      | 7.2                                    | 7.9                                    | <b>1.63</b>                | 0.01             |
| 1419492_s_at  | Defb1       | defensin beta 1                                                                             | Mm.5341.1                       | 5.0                                    | 5.7                                    | <b>1.63</b>                | 0.04             |
| 1424142_at    | Ikbkap      | inhibitor of kappa light polypeptide enhancer in B cells, kinase complex-associated protein | Mm.46573.1                      | 6.3                                    | 7.0                                    | <b>1.63</b>                | 0.00             |
| 1444616_x_at  |             |                                                                                             | Mm.29305.1                      | 4.3                                    | 5.0                                    | <b>1.63</b>                | 0.00             |
| 1447530_at    | F8a         | factor 8-associated gene A                                                                  | Mm.165807.1                     | 5.9                                    | 6.7                                    | <b>1.63</b>                | 0.00             |
| 1448471_a_at  | Ctla2a      | cytotoxic T lymphocyte-associated protein 2 alpha                                           | Mm.30144.1                      | 4.7                                    | 5.4                                    | <b>1.63</b>                | 0.01             |
| 1449110_at    | Rhob        | ras homolog gene family, member B                                                           | Mm.687.1                        | 9.4                                    | 10.1                                   | <b>1.63</b>                | 0.00             |
| 1418719_at    | Haus8       | 4HAUS augmin-like complex, subunit 8                                                        | Mm.27355.1                      | 5.5                                    | 6.2                                    | <b>1.62</b>                | 0.04             |
| 1419256_at    | Sptbn1      | spectrin beta, non-erythrocytic 1                                                           | Mm.123110.1                     | 7.9                                    | 8.6                                    | <b>1.62</b>                | 0.00             |
| 1429509_at    | Lsm12       | LSM12 homolog (S. cerevisiae)                                                               | Mm.36280.1                      | 6.0                                    | 6.7                                    | <b>1.62</b>                | 0.03             |
| 1431422_a_at  | Dusp14      | dual specificity phosphatase 14                                                             | Mm.142293.2                     | 5.3                                    | 6.0                                    | <b>1.62</b>                | 0.04             |
| 1434322_at    | Micall2     | MICAL-like 2                                                                                | Mm.89789.1                      | 4.8                                    | 5.5                                    | <b>1.62</b>                | 0.02             |
| 1439426_x_at  | Lyz1        | lysozyme 1                                                                                  | Mm.45436.3                      | 9.2                                    | 9.9                                    | <b>1.62</b>                | 0.01             |
| 1451421_a_at  | Rogdi       | rogdi homolog (Drosophila)                                                                  | Mm.27792.2                      | 8.7                                    | 9.4                                    | <b>1.62</b>                | 0.04             |
| 1416554_at    | Pdlim1      | PDZ and LIM domain 1 (elfin)                                                                | Mm.5567.1                       | 9.8                                    | 10.5                                   | <b>1.61</b>                | 0.01             |
| 1417472_at    | Myh9        | myosin, heavy polypeptide 9, non-muscle                                                     | Mm.5938.1                       | 9.0                                    | 9.7                                    | <b>1.61</b>                | 0.01             |
| 1423754_at    | Ifitm3      | interferon induced transmembrane protein 3                                                  | Mm.141021.1                     | 12.6                                   | 13.3                                   | <b>1.61</b>                | 0.00             |
| 1436785_a_at  | Sec14l3     | SEC14-like 3 (S. cerevisiae)                                                                | Mm.46347.1                      | 6.6                                    | 7.3                                    | <b>1.61</b>                | 0.00             |
| 1448188_at    | Ucp2        | uncoupling protein 2 (mitochondrial, proton carrier)                                        | Mm.144413.1                     | 8.8                                    | 9.5                                    | <b>1.61</b>                | 0.03             |
| 1453351_at    | Tbx20       | T-box 20                                                                                    | Mm.117009.1                     | 4.1                                    | 4.8                                    | <b>1.61</b>                | 0.01             |
| 1457687_at    | Bcl2        | B cell leukemia/lymphoma 2                                                                  | Mm.86383.1                      | 5.1                                    | 5.8                                    | <b>1.61</b>                | 0.03             |
| 1418456_a_at  | Cxcl14      | chemokine (C-X-C motif) ligand 14                                                           | Mm.30211.1                      | 5.8                                    | 6.5                                    | <b>1.6</b>                 | 0.01             |
| 1419155_a_at  | Sox4        | SRY (sex determining region Y)-box 4                                                        | Mm.18789.1                      | 6.7                                    | 7.3                                    | <b>1.6</b>                 | 0.00             |
| 1422779_at    | Smpd3       | sphingomyelin phosphodiesterase 3, neutral                                                  | Mm.143806.1                     | 4.1                                    | 4.7                                    | <b>1.6</b>                 | 0.02             |
| 1423642_at    | Tubb4b      | tubulin, beta 4B class IVB                                                                  | Mm.21840.1                      | 10.3                                   | 11.0                                   | <b>1.6</b>                 | 0.00             |
| 1424398_at    | Dhx36       | DEAH (Asp-Glu-Ala-His) box polypeptide 36                                                   | Mm.34158.1                      | 8.2                                    | 8.9                                    | <b>1.6</b>                 | 0.01             |
| 1429621_at    | Cand2       | cullin-associated and neddylation-dissociated 2 (putative)                                  | Mm.46006.1                      | 3.8                                    | 4.5                                    | <b>1.6</b>                 | 0.01             |
| 1429891_at    | Capsl       | calcyphosine-like                                                                           | Mm.82143.1                      | 2.5                                    | 3.2                                    | <b>1.6</b>                 | 0.01             |
| 1431062_a_at  | Exoc4       | exocyst complex component 4                                                                 | Mm.6925.2                       | 6.7                                    | 7.4                                    | <b>1.6</b>                 | 0.00             |

**Supplemental Table 9. Significant differently expressed genes in 3bKI HCC samples**

| Affymetrix ID | Gene Symbol   | Description                                                                                                                                         | Transcript ID<br>(Array Design) | 3aKO<br>avg<br>signal<br>log2<br>(n=4) | 3bKI<br>Avg<br>Signal<br>log2<br>(n=5) | Fold<br>Change<br>(linear) | ANOVA<br>p-value |
|---------------|---------------|-----------------------------------------------------------------------------------------------------------------------------------------------------|---------------------------------|----------------------------------------|----------------------------------------|----------------------------|------------------|
| 1456796_at    | Snai3         | snail family zinc finger 3                                                                                                                          | Mm.22910.1                      | 6.0                                    | 6.7                                    | <b>1.6</b>                 | 0.02             |
| 1420940_x_at  | Rgs5          | regulator of G-protein signaling 5                                                                                                                  | Mm.20954.1                      | 6.0                                    | 6.7                                    | <b>1.59</b>                | 0.00             |
| 1422583_at    | Rab3b         | RAB3B, member RAS oncogene family                                                                                                                   | Mm.41580.1                      | 5.2                                    | 5.8                                    | <b>1.59</b>                | 0.00             |
| 1423904_a_at  | Pvr           | poliovirus receptor                                                                                                                                 | Mm.134436.1                     | 5.6                                    | 6.2                                    | <b>1.59</b>                | 0.00             |
| 1428018_a_at  | AF251705      | cDNA sequence AF251705                                                                                                                              | Mm.2699.2                       | 6.6                                    | 7.3                                    | <b>1.59</b>                | 0.00             |
| 1433714_at    | Sult4a1       | sulfotransferase family 4A, member 1                                                                                                                | Mm.29330.1                      | 4.1                                    | 4.8                                    | <b>1.59</b>                | 0.03             |
| 1437692_x_at  | Anxa2         | annexin A2                                                                                                                                          | Mm.584.3                        | 4.4                                    | 5.0                                    | <b>1.59</b>                | 0.00             |
| 1440844_at    | Tob1          | transducer of ErbB-2.1                                                                                                                              | Mm.31688.1                      | 7.6                                    | 8.3                                    | <b>1.59</b>                | 0.01             |
| 1442693_at    | Trim5         | tripartite motif-containing 5                                                                                                                       | Mm.34718.1                      | 2.6                                    | 3.3                                    | <b>1.59</b>                | 0.01             |
| 1448303_at    | Gpnmb         | glycoprotein (transmembrane) nmb                                                                                                                    | Mm.23567.1                      | 4.8                                    | 5.5                                    | <b>1.59</b>                | 0.04             |
| 1455494_at    | Col1a1        | collagen, type I, alpha 1                                                                                                                           | Mm.22621.2                      | 4.7                                    | 5.3                                    | <b>1.59</b>                | 0.02             |
| 1456046_at    | Cd93          | CD93 antigen                                                                                                                                        | Mm.69004.1                      | 7.4                                    | 8.0                                    | <b>1.59</b>                | 0.01             |
| 1456110_at    | Ankrd11       | ankyrin repeat domain 11                                                                                                                            | Mm.41929.2                      | 7.3                                    | 8.0                                    | <b>1.59</b>                | 0.01             |
| 1458587_at    | 2310047D07Rik | RIKEN cDNA 2310047D07 gene                                                                                                                          | Mm.44573.1                      | 5.5                                    | 6.1                                    | <b>1.59</b>                | 0.01             |
| 1418350_at    | Hbegf         | heparin-binding EGF-like growth factor                                                                                                              | Mm.4661.1                       | 6.1                                    | 6.7                                    | <b>1.58</b>                | 0.04             |
| 1420563_at    | Gria3         | glutamate receptor, ionotropic, AMPA3 (alpha 3)                                                                                                     | Mm.42021.1                      | 5.2                                    | 5.9                                    | <b>1.58</b>                | 0.00             |
| 1424906_at    | Pqlc3         | PQ loop repeat containing                                                                                                                           | Mm.5675.1                       | 4.7                                    | 5.4                                    | <b>1.58</b>                | 0.01             |
| 1434265_s_at  | Ank2          | ankyrin 2, brain                                                                                                                                    | Mm.41182.1                      | 4.7                                    | 5.4                                    | <b>1.58</b>                | 0.03             |
| 1440156_s_at  | Tox2          | TOX high mobility group box family member 2                                                                                                         | Mm.40354.1                      | 5.3                                    | 6.0                                    | <b>1.58</b>                | 0.03             |
| 1449117_at    | Jund          | jun D proto-oncogene                                                                                                                                | Mm.1175.1                       | 9.2                                    | 9.9                                    | <b>1.58</b>                | 0.00             |
| 1450484_a_at  | Cmpk2         | cytidine monophosphate (UMP-CMP) kinase 2, mitochondrial                                                                                            | Mm.1676.1                       | 5.0                                    | 5.7                                    | <b>1.58</b>                | 0.04             |
| 1454808_at    | Micu2         | mitochondrial calcium uptake 2                                                                                                                      | Mm.26834.1                      | 8.5                                    | 9.1                                    | <b>1.58</b>                | 0.01             |
| 1458018_at    |               |                                                                                                                                                     | Mm.207589.1                     | 3.4                                    | 4.0                                    | <b>1.58</b>                | 0.01             |
| 1416013_at    | Pld3          | phospholipase D family, member 3                                                                                                                    | Mm.6483.1                       | 8.5                                    | 9.2                                    | <b>1.57</b>                | 0.00             |
| 1425398_at    | Hist1h2bf     | histone cluster 1, H2bf; histone cluster 1, H2bj; histone cluster 1, H2bl; histone cluster 1, H2bn; histone cluster 1, H2bq; histone cluster 1 H2br | Mm.21579.2                      | 3.7                                    | 4.3                                    | <b>1.57</b>                | 0.05             |
| 1429234_s_at  | Sept11        | septin 11                                                                                                                                           | Mm.27384.1                      | 8.1                                    | 8.8                                    | <b>1.57</b>                | 0.01             |
| 1446798_at    | Map4k3        | mitogen-activated protein kinase kinase kinase 3                                                                                                    | Mm.210311.1                     | 3.4                                    | 4.0                                    | <b>1.57</b>                | 0.00             |
| 1451788_at    | F11           | coagulation factor XI                                                                                                                               | Mm.33326.1                      | 9.4                                    | 10.0                                   | <b>1.57</b>                | 0.01             |
| 1456907_at    | Cxcl9         | chemokine (C-X-C motif) ligand 9                                                                                                                    | Mm.119763.1                     | 4.0                                    | 4.7                                    | <b>1.57</b>                | 0.04             |
| 1459864_at    | Gpr146        | G protein-coupled receptor 146                                                                                                                      | Mm.169778.1                     | 4.8                                    | 5.4                                    | <b>1.57</b>                | 0.00             |
| 1419108_at    | Ophn1         | oligophrenin 1                                                                                                                                      | Mm.100064.1                     | 4.3                                    | 4.9                                    | <b>1.56</b>                | 0.00             |
| 1419970_at    | Slc35a5       | solute carrier family 35, member A5                                                                                                                 | Mm.195368.1                     | 4.0                                    | 4.7                                    | <b>1.56</b>                | 0.01             |
| 1422534_at    | Cyp51         | cytochrome P450, family 51                                                                                                                          | Mm.140158.1                     | 6.3                                    | 6.9                                    | <b>1.56</b>                | 0.02             |
| 1426410_at    | Pdk3          | pyruvate dehydrogenase kinase, isoenzyme 3                                                                                                          | Mm.12775.1                      | 5.2                                    | 5.9                                    | <b>1.56</b>                | 0.04             |
| 1426511_at    | Susd2         | sushi domain containing 2                                                                                                                           | Mm.31096.1                      | 5.9                                    | 6.6                                    | <b>1.56</b>                | 0.04             |

**Supplemental Table 9. Significant differently expressed genes in 3bKI HCC samples**

| Affymetrix ID | Gene Symbol | Description                                                                                         | Transcript ID<br>(Array Design) | 3aKO<br>avg<br>signal<br>log2<br>(n=4) | 3bKI<br>Avg<br>Signal<br>log2<br>(n=5) | Fold<br>Change<br>(linear) | ANOVA<br>p-value |
|---------------|-------------|-----------------------------------------------------------------------------------------------------|---------------------------------|----------------------------------------|----------------------------------------|----------------------------|------------------|
| 1431909_at    | Zc3hav1     | zinc finger CCCH type, antiviral 1                                                                  | Mm.195653.1                     | 4.7                                    | 5.3                                    | <b>1.56</b>                | 0.00             |
| 1449191_at    | Wfdc12      | WAP four-disulfide core domain 12                                                                   | Mm.6433.1                       | 5.6                                    | 6.3                                    | <b>1.56</b>                | 0.03             |
| 1453768_a_at  | Fam110a     | family with sequence similarity 110,<br>member A                                                    | Mm.18228.2                      | 5.8                                    | 6.4                                    | <b>1.56</b>                | 0.00             |
| 1457356_at    |             |                                                                                                     | Mm.80556.1                      | 5.4                                    | 6.0                                    | <b>1.56</b>                | 0.00             |
| 1415798_at    | Ddr1        | discoidin domain receptor family,<br>member 1                                                       | Mm.5021.1                       | 4.8                                    | 5.5                                    | <b>1.55</b>                | 0.00             |
| 1428497_at    | Secisbp2    | SECIS binding protein 2                                                                             | Mm.46606.1                      | 7.3                                    | 7.9                                    | <b>1.55</b>                | 0.00             |
| 1436058_at    | Rsad2       | radical S-adenosyl methionine<br>domain containing 2                                                | Mm.27276.1                      | 7.2                                    | 7.8                                    | <b>1.55</b>                | 0.04             |
| 1437670_x_at  | Cd151       | CD151 antigen                                                                                       | Mm.30246.4                      | 9.0                                    | 9.7                                    | <b>1.55</b>                | 0.00             |
| 1438677_at    | Pkp4        | plakophilin 4                                                                                       | Mm.153748.2                     | 8.3                                    | 8.9                                    | <b>1.55</b>                | 0.00             |
| 1448883_at    | Lgmn        | legumain                                                                                            | Mm.17185.1                      | 9.8                                    | 10.4                                   | <b>1.55</b>                | 0.01             |
| 1452139_at    | Slc35c1     | solute carrier family 35, member C1                                                                 | Mm.35136.1                      | 6.6                                    | 7.2                                    | <b>1.55</b>                | 0.01             |
| 1459766_x_at  | Sf1         | splicing factor 1                                                                                   | Mm.125450.1                     | 9.7                                    | 10.4                                   | <b>1.55</b>                | 0.00             |
| 1459788_at    | Gpr107      | G protein-coupled receptor 107                                                                      | Mm.162126.1                     | 4.8                                    | 5.5                                    | <b>1.55</b>                | 0.00             |
| 1417495_x_at  | Cp          | ceruloplasmin                                                                                       | Mm.13787.1                      | 12.7                                   | 13.4                                   | <b>1.54</b>                | 0.01             |
| 1428549_at    | Ccdc3       | coiled-coil domain containing 3                                                                     | Mm.18797.1                      | 6.5                                    | 7.1                                    | <b>1.54</b>                | 0.02             |
| 1428864_at    | Dusp8       | dual specificity phosphatase 8                                                                      | Mm.39987.1                      | 6.6                                    | 7.2                                    | <b>1.54</b>                | 0.00             |
| 1433445_x_at  | Hmgcs1      | 3-hydroxy-3-methylglutaryl-<br>Coenzyme A synthase 1                                                | Mm.61526.4                      | 11.9                                   | 12.5                                   | <b>1.54</b>                | 0.01             |
| 1434020_at    | Pdap1       | PDGFA associated protein 1                                                                          | Mm.3360.2                       | 8.1                                    | 8.7                                    | <b>1.54</b>                | 0.00             |
| 1435990_at    | Adamts2     | a disintegrin-like and<br>metallopeptidase (reprolysin type)<br>with thrombospondin type 1 motif, 2 | Mm.23038.1                      | 4.7                                    | 5.3                                    | <b>1.54</b>                | 0.01             |
| 1437188_at    | Gabbr1      | gamma-aminobutyric acid (GABA) B<br>receptor, 1                                                     | Mm.32191.5                      | 3.8                                    | 4.4                                    | <b>1.54</b>                | 0.02             |
| 1437616_x_at  | Zdhhc14     | zinc finger, DHHC domain containing<br>14                                                           | Mm.22338.3                      | 6.8                                    | 7.4                                    | <b>1.54</b>                | 0.00             |
| 1443475_at    | Hist1h3i    |                                                                                                     | Mm.39245.1                      | 4.2                                    | 4.8                                    | <b>1.54</b>                | 0.01             |
| 1448180_a_at  | Hn1         | hematological and neurological<br>expressed sequence 1                                              | Mm.1775.1                       | 7.7                                    | 8.3                                    | <b>1.54</b>                | 0.02             |
| 1452964_at    | Tll11       | tubulin tyrosine ligase-like family,<br>member 11                                                   | Mm.21591.1                      | 5.8                                    | 6.4                                    | <b>1.54</b>                | 0.00             |
| 1415922_s_at  | Marcksl1    | MARCKS-like 1                                                                                       | Mm.2769.1                       | 8.3                                    | 8.9                                    | <b>1.53</b>                | 0.01             |
| 1416686_at    | Plod2       | procollagen lysine, 2-oxoglutarate 5-<br>dioxygenase 2                                              | Mm.79983.1                      | 3.8                                    | 4.5                                    | <b>1.53</b>                | 0.00             |
| 1418448_at    | Rras        | Harvey rat sarcoma oncogene,<br>subgroup R                                                          | Mm.257.1                        | 8.9                                    | 9.5                                    | <b>1.53</b>                | 0.01             |
| 1419416_a_at  | Rarg        | retinoic acid receptor, gamma                                                                       | Mm.1273.1                       | 5.8                                    | 6.5                                    | <b>1.53</b>                | 0.00             |
| 1420293_at    | Lpcat1      | lysophosphatidylcholine<br>acyltransferase 1                                                        | Mm.130349.2                     | 4.0                                    | 4.6                                    | <b>1.53</b>                | 0.00             |
| 1421027_a_at  | Mef2c       | myocyte enhancer factor 2C                                                                          | Mm.24001.1                      | 4.4                                    | 5.0                                    | <b>1.53</b>                | 0.01             |
| 1424262_at    | Aif1l       | allograft inflammatory factor 1-like                                                                | Mm.24838.1                      | 7.4                                    | 8.0                                    | <b>1.53</b>                | 0.00             |
| 1430619_a_at  | Mvk         | mevalonate kinase                                                                                   | Mm.28088.2                      | 7.9                                    | 8.5                                    | <b>1.53</b>                | 0.01             |
| 1438904_at    | Nhs1l       | NHS-like 1                                                                                          | Mm.208961.1                     | 8.4                                    | 9.0                                    | <b>1.53</b>                | 0.00             |

**Supplemental Table 9. Significant differently expressed genes in 3bKI HCC samples**

| Affymetrix ID | Gene Symbol   | Description                                                                      | Transcript ID<br>(Array Design) | 3aKO<br>avg<br>signal<br>log2<br>(n=4) | 3bKI<br>Avg<br>Signal<br>log2<br>(n=5) | Fold<br>Change<br>(linear) | ANOVA<br>p-value |
|---------------|---------------|----------------------------------------------------------------------------------|---------------------------------|----------------------------------------|----------------------------------------|----------------------------|------------------|
| 1440916_at    | 2510049J12Rik | makorin, ring finger protein 2,<br>opposite strand                               | Mm.133694.1                     | 8.4                                    | 9.0                                    | <b>1.53</b>                | 0.01             |
| 1449271_a_at  | Hebp2         | heme binding protein 2                                                           | Mm.35551.1                      | 4.7                                    | 5.3                                    | <b>1.53</b>                | 0.01             |
| 1449370_at    | Sox4          | SRY (sex determining region Y)-box<br>4                                          | Mm.18789.1                      | 4.4                                    | 5.0                                    | <b>1.53</b>                | 0.01             |
| 1416916_at    | Elf3          | E74-like factor 3                                                                | Mm.3963.1                       | 5.9                                    | 6.5                                    | <b>1.52</b>                | 0.04             |
| 1417059_at    | Krtcap2       | keratinocyte associated protein 2                                                | Mm.177991.1                     | 10.6                                   | 11.2                                   | <b>1.52</b>                | 0.00             |
| 1422286_a_at  | Tgif1         | TGFB-induced factor homeobox 1                                                   | Mm.8155.1                       | 7.5                                    | 8.1                                    | <b>1.52</b>                | 0.00             |
| 1423140_at    | Lipa          | lysosomal acid lipase A                                                          | Mm.181935.1                     | 6.2                                    | 6.8                                    | <b>1.52</b>                | 0.00             |
| 1424684_at    | Rab5c         | RAB5C, member RAS oncogene<br>family                                             | Mm.29829.1                      | 8.8                                    | 9.4                                    | <b>1.52</b>                | 0.01             |
| 1428228_at    | Pgm3          | phosphoglucomutase 3                                                             | Mm.20245.1                      | 7.3                                    | 7.9                                    | <b>1.52</b>                | 0.03             |
| 1430021_a_at  | Sae1          | SUMO1 activating enzyme subunit 1                                                | Mm.29698.2                      | 8.5                                    | 9.1                                    | <b>1.52</b>                | 0.00             |
| 1434314_s_at  | Rab11fip5     | RAB11 family interacting protein 5<br>(class I)                                  | Mm.28032.1                      | 5.7                                    | 6.3                                    | <b>1.52</b>                | 0.00             |
| 1435625_at    | Entpd7        | ectonucleoside triphosphate<br>diphosphohydrolase 7                              | Mm.24247.1                      | 4.5                                    | 5.1                                    | <b>1.52</b>                | 0.04             |
| 1436124_at    | Pcyt1b        | phosphate cytidyltransferase 1,<br>choline, beta isoform                         | Mm.44503.1                      | 3.8                                    | 4.4                                    | <b>1.52</b>                | 0.04             |
| 1437451_at    | Ecscr         | endothelial cell surface expressed<br>chemotaxis and apoptosis regulator         | Mm.46243.1                      | 5.7                                    | 6.3                                    | <b>1.52</b>                | 0.01             |
| 1449139_at    | Ostc          | oligosaccharyltransferase complex<br>subunit                                     | Mm.9811.1                       | 10.7                                   | 11.3                                   | <b>1.52</b>                | 0.02             |
| 1449976_a_at  | Gpr35         | G protein-coupled receptor 35                                                    | Mm.152780.1                     | 4.3                                    | 4.9                                    | <b>1.52</b>                | 0.04             |
| 1451224_at    | Scamp5        | secretory carrier membrane protein<br>5                                          | Mm.102278.2                     | 7.0                                    | 7.6                                    | <b>1.52</b>                | 0.04             |
| 1452152_at    | Clint1        | clathrin interactor 1                                                            | Mm.24036.1                      | 9.3                                    | 9.9                                    | <b>1.52</b>                | 0.00             |
| 1454965_at    | Fam171b       | family with sequence similarity 171,<br>member B                                 | Mm.26101.1                      | 4.2                                    | 4.8                                    | <b>1.52</b>                | 0.00             |
| 1457171_at    |               |                                                                                  | Mm.128801.1                     | 6.0                                    | 6.6                                    | <b>1.52</b>                | 0.02             |
| 1457455_at    | Zfp280d       | zinc finger protein 280D                                                         | Mm.132512.1                     | 5.2                                    | 5.8                                    | <b>1.52</b>                | 0.00             |
| 1459729_at    | Slc13a5       | solute carrier family 13 (sodium-<br>dependent citrate transporter),<br>member 5 | Mm.151058.1                     | 4.8                                    | 5.4                                    | <b>1.52</b>                | 0.03             |
| 1459761_x_at  | Cadm2         | cell adhesion molecule 2                                                         | Mm.117889.1                     | 4.2                                    | 4.8                                    | <b>1.52</b>                | 0.01             |
| 1460343_at    | Neur11a       | neuralized homolog 1A (Drosophila)                                               | Mm.103587.2                     | 3.8                                    | 4.4                                    | <b>1.52</b>                | 0.00             |
| 1423362_at    | Sort1         | sortilin 1                                                                       | Mm.157119.1                     | 7.6                                    | 8.2                                    | <b>1.51</b>                | 0.01             |
| 1423829_at    | Fam49b        | family with sequence similarity 49,<br>member B                                  | Mm.22383.1                      | 7.0                                    | 7.6                                    | <b>1.51</b>                | 0.03             |
| 1437132_x_at  | Nedd9         | neural precursor cell expressed,<br>developmentally down-regulated<br>gene 9     | Mm.8315.2                       | 5.4                                    | 6.0                                    | <b>1.51</b>                | 0.04             |
| 1446109_at    | Wdfy3         | WD repeat and FYVE domain<br>containing 3                                        | Mm.209277.1                     | 4.3                                    | 4.9                                    | <b>1.51</b>                | 0.00             |
| 1447803_x_at  | Capg          | capping protein (actin filament),<br>gelsolin-like                               | Mm.70286.1                      | 2.8                                    | 3.4                                    | <b>1.51</b>                | 0.01             |

**Supplemental Table 9. Significant differently expressed genes in 3bKI HCC samples**

| Affymetrix ID | Gene Symbol   | Description                                                | Transcript ID<br>(Array Design) | 3aKO<br>avg<br>signal<br>log2<br>(n=4) | 3bKI<br>Avg<br>Signal<br>log2<br>(n=5) | Fold<br>Change<br>(linear) | ANOVA<br>p-value |
|---------------|---------------|------------------------------------------------------------|---------------------------------|----------------------------------------|----------------------------------------|----------------------------|------------------|
| 1448534_at    | Sirpa         | signal-regulatory protein alpha                            | Mm.1682.1                       | 7.9                                    | 8.5                                    | 1.51                       | 0.05             |
| 1450919_at    | Mpp1          | membrane protein, palmitoylated                            | Mm.2814.1                       | 9.7                                    | 10.3                                   | 1.51                       | 0.02             |
| 1451210_at    | Ppap2c        | phosphatidic acid phosphatase type 2C                      | Mm.28873.2                      | 8.7                                    | 9.3                                    | 1.51                       | 0.01             |
| 1452124_at    | Ank3          | ankyrin 3, epithelial                                      | Mm.3526.5                       | 7.5                                    | 8.1                                    | 1.51                       | 0.00             |
| 1455393_at    | Cp            | ceruloplasmin                                              | Mm.13787.2                      | 13.3                                   | 13.9                                   | 1.51                       | 0.02             |
| 1455576_at    | Rinl          | Ras and Rab interactor-like                                | Mm.74632.1                      | 4.5                                    | 5.1                                    | 1.51                       | 0.00             |
| 1455730_at    | Dlgap5        | discs, large (Drosophila) homolog-associated protein 5     | Mm.35569.1                      | 4.8                                    | 5.4                                    | 1.51                       | 0.03             |
| 1456310_a_at  | 2610002J02Rik | RIKEN cDNA 2610002J02 gene                                 | Mm.10374.3                      | 8.0                                    | 8.6                                    | 1.51                       | 0.03             |
| 1458818_at    | D3Ert162e     | DNA segment, Chr 3, ERATO Doi 162, expressed               | Mm.154754.1                     | 4.3                                    | 4.9                                    | 1.51                       | 0.01             |
| 1417227_at    | Mccc1         | methylcrotonoyl-Coenzyme A carboxylase 1 (alpha)           | Mm.154589.1                     | 9.8                                    | 9.2                                    | -1.51                      | 0.01             |
| 1417555_at    | Atad1         | ATPase family, AAA domain containing 1                     | Mm.27123.1                      | 5.7                                    | 5.1                                    | -1.51                      | 0.01             |
| 1418504_at    | Hspa9         | heat shock protein 9                                       | Mm.2849.1                       | 11.5                                   | 10.9                                   | -1.51                      | 0.00             |
| 1418586_at    | Adcy9         | adenylate cyclase 9                                        | Mm.4294.1                       | 9.1                                    | 8.5                                    | -1.51                      | 0.01             |
| 1418640_at    | Sirt1         | sirtuin 1                                                  | Mm.12604.1                      | 6.8                                    | 6.2                                    | -1.51                      | 0.05             |
| 1419918_at    | Tmed7         | transmembrane emp24 protein transport domain containing 7  | Mm.202023.1                     | 9.0                                    | 8.4                                    | -1.51                      | 0.00             |
| 1420339_at    | Memo1         | mediator of cell motility 1                                | Mm.28773.1                      | 6.9                                    | 6.3                                    | -1.51                      | 0.00             |
| 1420542_at    | Dnajc28       | DnaJ (Hsp40) homolog, subfamily C, member 28               | Mm.101927.1                     | 6.8                                    | 6.2                                    | -1.51                      | 0.02             |
| 1423044_at    | Prosc         | proline synthetase co-transcribed                          | Mm.214583.1                     | 10.4                                   | 9.8                                    | -1.51                      | 0.01             |
| 1423386_at    | Psmc9         | proteasome (prosome, macropain) 26S subunit, non-ATPase, 9 | Mm.30237.1                      | 9.1                                    | 8.5                                    | -1.51                      | 0.01             |
| 1423780_at    | Hibadh        | 3-hydroxyisobutyrate dehydrogenase                         | Mm.4290.1                       | 12.2                                   | 11.6                                   | -1.51                      | 0.00             |
| 1425206_a_at  | Ube3a         | ubiquitin protein ligase E3A                               | Mm.132544.2                     | 6.6                                    | 6.0                                    | -1.51                      | 0.00             |
| 1425331_at    | Zfp106        | zinc finger protein 106                                    | Mm.27653.2                      | 8.3                                    | 7.7                                    | -1.51                      | 0.00             |
| 1428725_at    | Pias2         | protein inhibitor of activated STAT 2                      | Mm.30882.1                      | 7.8                                    | 7.2                                    | -1.51                      | 0.01             |
| 1429351_at    | Klhl24        | kelch-like 24                                              | Mm.126970.1                     | 7.7                                    | 7.1                                    | -1.51                      | 0.02             |
| 1429537_at    | Sfrs18        | PNN interacting serine/arginine-rich                       | Mm.100117.1                     | 7.8                                    | 7.2                                    | -1.51                      | 0.00             |
| 1430458_at    | Supt6         | suppressor of Ty 6                                         | Mm.159554.1                     | 3.4                                    | 2.8                                    | -1.51                      | 0.01             |
| 1431071_at    | Mtx3          | metaxin 3                                                  | Mm.23391.1                      | 5.3                                    | 4.8                                    | -1.51                      | 0.01             |
| 1433574_at    | Cdc37l1       | cell division cycle 37-like 1                              | Mm.73550.2                      | 8.7                                    | 8.1                                    | -1.51                      | 0.00             |
| 1434806_at    | Mtx3          | metaxin 3                                                  | Mm.202301.1                     | 6.1                                    | 5.5                                    | -1.51                      | 0.02             |
| 1435339_at    | Kctd15        | potassium channel tetramerisation domain containing 15     | Mm.34811.1                      | 6.8                                    | 6.2                                    | -1.51                      | 0.02             |
| 1435982_at    | Stx12         | syntaxin 12                                                | Mm.41266.1                      | 6.9                                    | 6.3                                    | -1.51                      | 0.01             |
| 1436387_at    | C330006P03Rik | RIKEN cDNA C330006P03 gene; homer homolog 1 (Drosophila)   | Mm.131563.1                     | 5.9                                    | 5.3                                    | -1.51                      | 0.04             |
| 1436590_at    | Ppp1r3b       | protein phosphatase 1, regulatory (inhibitor) subunit 3B   | Mm.24668.1                      | 11.8                                   | 11.2                                   | -1.51                      | 0.04             |
| 1436697_at    |               |                                                            | Mm.88335.1                      | 6.4                                    | 5.8                                    | -1.51                      | 0.00             |

**Supplemental Table 9. Significant differently expressed genes in 3bKI HCC samples**

| Affymetrix ID | Gene Symbol   | Description                                                                                         | Transcript ID<br>(Array Design) | 3aKO<br>avg<br>signal<br>log2<br>(n=4) | 3bKI<br>Avg<br>Signal<br>log2<br>(n=5) | Fold<br>Change<br>(linear) | ANOVA<br>p-value |
|---------------|---------------|-----------------------------------------------------------------------------------------------------|---------------------------------|----------------------------------------|----------------------------------------|----------------------------|------------------|
| 1436844_at    | Pura          | purine rich element binding protein A                                                               | Mm.44643.1                      | 6.7                                    | 6.1                                    | -1.51                      | 0.00             |
| 1437179_at    | Rif1          | Rap1 interacting factor 1 homolog<br>(yeast)                                                        | Mm.12647.1                      | 7.1                                    | 6.5                                    | -1.51                      | 0.01             |
| 1442005_at    | AW987390      | expressed sequence AW987390                                                                         | Mm.116907.1                     | 7.9                                    | 7.3                                    | -1.51                      | 0.01             |
| 1443619_at    | Tmem30a       | transmembrane protein 30A                                                                           | Mm.218453.1                     | 5.3                                    | 4.8                                    | -1.51                      | 0.00             |
| 1444574_at    |               |                                                                                                     | Mm.219403.1                     | 4.9                                    | 4.3                                    | -1.51                      | 0.02             |
| 1449012_s_at  | Fndc4         | fibronectin type III domain containing<br>4                                                         | Mm.40009.1                      | 6.8                                    | 6.2                                    | -1.51                      | 0.01             |
| 1450744_at    | Ell2          | elongation factor RNA polymerase II<br>2                                                            | Mm.21288.1                      | 9.3                                    | 8.8                                    | -1.51                      | 0.00             |
| 1450776_at    | Agpat6        | 1-acylglycerol-3-phosphate O-<br>acyltransferase 6 (lysophosphatidic<br>acid acyltransferase, zeta) | Mm.200898.1                     | 10.4                                   | 9.8                                    | -1.51                      | 0.00             |
| 1451275_at    | Uhrf1bp1l     | UHRF1 (ICBP90) binding protein 1-<br>like                                                           | Mm.34798.1                      | 9.9                                    | 9.3                                    | -1.51                      | 0.01             |
| 1451378_at    | Utp6          | UTP6, small subunit (SSU)<br>processome component, homolog<br>(yeast)                               | Mm.30167.1                      | 7.7                                    | 7.1                                    | -1.51                      | 0.00             |
| 1452573_a_at  | Ercc6l2       | excision repair cross-complementing<br>rodent repair deficiency,<br>complementation group 6 like 2  | Mm.45349.2                      | 6.2                                    | 5.6                                    | -1.51                      | 0.00             |
| 1452780_at    | Gtf3c2        | general transcription factor IIIC,<br>polypeptide 2, beta                                           | Mm.35779.1                      | 8.6                                    | 8.0                                    | -1.51                      | 0.00             |
| 1453208_at    | 2700089E24Rik | RIKEN cDNA 2700089E24 gene                                                                          | Mm.608.1                        | 9.7                                    | 9.1                                    | -1.51                      | 0.00             |
| 1454777_at    | Slco2b1       | solute carrier organic anion<br>transporter family, member 2b1                                      | Mm.27178.1                      | 10.5                                   | 9.9                                    | -1.51                      | 0.01             |
| 1455092_at    | Zfp207        | zinc finger protein 207                                                                             | Mm.12236.3                      | 7.1                                    | 6.5                                    | -1.51                      | 0.01             |
| 1455163_at    | Guf1          | GUF1 GTPase homolog (S.<br>cerevisiae)                                                              | Mm.186774.1                     | 6.5                                    | 5.9                                    | -1.51                      | 0.00             |
| 1455534_s_at  | Osbpl11       | oxysterol binding protein-like 11                                                                   | Mm.26564.1                      | 8.7                                    | 8.1                                    | -1.51                      | 0.00             |
| 1455625_at    | Taf10         | TAF10 RNA polymerase II, TATA<br>box binding protein (TBP)-associated<br>factor                     | Mm.8131.3                       | 7.0                                    | 6.4                                    | -1.51                      | 0.00             |
| 1455631_at    | H13           | histocompatibility 13                                                                               | Mm.26991.4                      | 5.2                                    | 4.6                                    | -1.51                      | 0.00             |
| 1455746_at    | Kif13a        | kinesin family member 13A                                                                           | Mm.116937.1                     | 7.7                                    | 7.1                                    | -1.51                      | 0.00             |
| 1456597_at    | Heatr3        | HEAT repeat containing 3                                                                            | Mm.36291.2                      | 7.9                                    | 7.3                                    | -1.51                      | 0.01             |
| 1458708_at    |               |                                                                                                     | Mm.189097.1                     | 8.0                                    | 7.4                                    | -1.51                      | 0.01             |
| 1459887_at    |               |                                                                                                     | Mm.37791.2                      | 6.4                                    | 5.8                                    | -1.51                      | 0.00             |
| 1460316_at    | Acs11         | acyl-CoA synthetase long-chain<br>family member 1                                                   | Mm.28962.1                      | 9.4                                    | 8.8                                    | -1.51                      | 0.00             |
| 1460705_at    | Rps6kb1       | ribosomal protein S6 kinase,<br>polypeptide 1                                                       | Mm.34490.1                      | 8.3                                    | 7.8                                    | -1.51                      | 0.00             |
| 1416409_at    | Acox1         | acyl-Coenzyme A oxidase 1,<br>palmitoyl                                                             | Mm.8403.1                       | 12.9                                   | 12.3                                   | -1.52                      | 0.01             |

**Supplemental Table 9. Significant differently expressed genes in 3bKI HCC samples**

| Affymetrix ID | Gene Symbol | Description                                                         | Transcript ID<br>(Array Design) | 3aKO<br>avg<br>signal<br>log2<br>(n=4) | 3bKI<br>Avg<br>Signal<br>log2<br>(n=5) | Fold<br>Change<br>(linear) | ANOVA<br>p-value |
|---------------|-------------|---------------------------------------------------------------------|---------------------------------|----------------------------------------|----------------------------------------|----------------------------|------------------|
| 1419931_at    | Abcb7       | ATP-binding cassette, sub-family B (MDR/TAP), member 7              | Mm.198847.1                     | 6.1                                    | 5.5                                    | -1.52                      | 0.00             |
| 1420971_at    | Ubr1        | ubiquitin protein ligase E3 component n-recognin 1                  | Mm.10731.1                      | 7.5                                    | 6.9                                    | -1.52                      | 0.00             |
| 1422064_a_at  | Zbtb20      | zinc finger and BTB domain containing 20                            | Mm.38250.1                      | 9.6                                    | 9.0                                    | -1.52                      | 0.01             |
| 1422524_at    | Abcb6       | ATP-binding cassette, sub-family B (MDR/TAP), member 6              | Mm.28663.1                      | 9.7                                    | 9.1                                    | -1.52                      | 0.00             |
| 1424540_at    | Hipk1       | homeodomain interacting protein kinase 1                            | Mm.20827.2                      | 10.1                                   | 9.5                                    | -1.52                      | 0.00             |
| 1424836_a_at  | Clasp2      | CLIP associating protein 2                                          | Mm.26780.1                      | 7.6                                    | 7.0                                    | -1.52                      | 0.04             |
| 1425036_a_at  | Tnrc6a      | trinucleotide repeat containing 6a                                  | Mm.220983.1                     | 8.4                                    | 7.8                                    | -1.52                      | 0.00             |
| 1425540_at    | Otc         | ornithine transcarbamylase                                          | Mm.2611.2                       | 7.8                                    | 7.1                                    | -1.52                      | 0.00             |
| 1425668_a_at  | St3gal4     | ST3 beta-galactoside alpha-2,3-sialyltransferase 4                  | Mm.2793.2                       | 10.1                                   | 9.5                                    | -1.52                      | 0.02             |
| 1426981_at    | Pcsk6       | proprotein convertase subtilisin/kexin type 6                       | Mm.32906.1                      | 10.1                                   | 9.5                                    | -1.52                      | 0.00             |
| 1427574_s_at  | Sh3d19      | SH3 domain protein D19                                              | Mm.207077.1                     | 6.9                                    | 6.3                                    | -1.52                      | 0.00             |
| 1427966_at    | Fam105b     | OTU deubiquitinase with linear linkage specificity                  | Mm.100380.1                     | 9.4                                    | 8.8                                    | -1.52                      | 0.00             |
| 1428448_a_at  | Gtf3c2      | general transcription factor IIIC, polypeptide 2, beta              | Mm.35779.1                      | 8.2                                    | 7.6                                    | -1.52                      | 0.00             |
| 1428546_at    | Syncrip     | synaptotagmin binding, cytoplasmic RNA interacting protein          | Mm.196209.1                     | 7.6                                    | 7.0                                    | -1.52                      | 0.01             |
| 1428919_at    | Fgfr1op     | Fgfr1 oncogene partner                                              | Mm.79782.1                      | 8.4                                    | 7.8                                    | -1.52                      | 0.00             |
| 1430097_at    |             |                                                                     | Mm.96601.1                      | 4.0                                    | 3.4                                    | -1.52                      | 0.01             |
| 1431052_at    | Arhgap12    | Rho GTPase activating protein 12                                    | Mm.101434.1                     | 5.4                                    | 4.8                                    | -1.52                      | 0.01             |
| 1431068_at    | Rmnd5a      | required for meiotic nuclear division 5 homolog A (S. cerevisiae)   | Mm.69047.1                      | 8.5                                    | 7.9                                    | -1.52                      | 0.02             |
| 1433669_at    | Akap8       | A kinase (PRKA) anchor protein 8                                    | Mm.200919.1                     | 9.0                                    | 8.4                                    | -1.52                      | 0.00             |
| 1433724_at    | D15Ert621e  | DNA segment, Chr 15, ERATO Doi 621, expressed                       | Mm.3224.1                       | 8.5                                    | 7.9                                    | -1.52                      | 0.00             |
| 1433911_at    | Smg6        | Smg-6 homolog, nonsense mediated mRNA decay factor (C. elegans)     | Mm.27034.1                      | 7.5                                    | 6.9                                    | -1.52                      | 0.00             |
| 1434039_at    | Appbp2      | amyloid beta precursor protein (cytoplasmic tail) binding protein 2 | Mm.86454.1                      | 5.8                                    | 5.2                                    | -1.52                      | 0.00             |
| 1435444_at    | Atf6        | activating transcription factor 6                                   | Mm.27843.1                      | 8.8                                    | 8.2                                    | -1.52                      | 0.00             |
| 1436666_at    |             |                                                                     | Mm.96522.1                      | 5.0                                    | 4.4                                    | -1.52                      | 0.00             |
| 1437065_at    | Zbtb20      | zinc finger and BTB domain containing 20                            | Mm.31375.1                      | 8.0                                    | 7.4                                    | -1.52                      | 0.04             |
| 1438268_at    | Rc3h2       | ring finger and CCCH-type zinc finger domains 2                     | Mm.216644.1                     | 6.3                                    | 5.7                                    | -1.52                      | 0.01             |
| 1438807_at    | Hnrnpr      | heterogeneous nuclear ribonucleoprotein R                           | Mm.38819.1                      | 6.4                                    | 5.8                                    | -1.52                      | 0.01             |
| 1444259_at    | AW495222    | expressed sequence AW495222                                         | Mm.40930.1                      | 7.1                                    | 6.5                                    | -1.52                      | 0.00             |

**Supplemental Table 9. Significant differently expressed genes in 3bKI HCC samples**

| Affymetrix ID | Gene Symbol | Description                                                                                                                                                                                                                              | Transcript ID<br>(Array Design) | 3aKO<br>avg<br>signal<br>log2<br>(n=4) | 3bKI<br>Avg<br>Signal<br>log2<br>(n=5) | Fold<br>Change<br>(linear) | ANOVA<br>p-value |
|---------------|-------------|------------------------------------------------------------------------------------------------------------------------------------------------------------------------------------------------------------------------------------------|---------------------------------|----------------------------------------|----------------------------------------|----------------------------|------------------|
| 1445629_at    | Slc35d1     | Mus musculus solute carrier family 35 (UDP-glucuronic acid/UDP-N-acetylgalactosamine dual transporter), member D1 (Slc35d1), mRNA.; solute carrier family 35 (UDP-glucuronic acid/UDP-N-acetylgalactosamine dual transporter), member D1 | Mm.69097.1                      | 6.0                                    | 5.4                                    | -1.52                      | 0.01             |
| 1446626_at    | Tango2      | transport and golgi organization 2                                                                                                                                                                                                       | Mm.214694.1                     | 6.4                                    | 5.8                                    | -1.52                      | 0.01             |
| 1447944_at    | Zkscan1     | zinc finger with KRAB and SCAN domains 1                                                                                                                                                                                                 | Mm.25477.2                      | 7.6                                    | 7.0                                    | -1.52                      | 0.00             |
| 1449505_at    | Kpna1       | karyopherin (importin) alpha 1                                                                                                                                                                                                           | Mm.6952.1                       | 9.3                                    | 8.7                                    | -1.52                      | 0.00             |
| 1449536_at    | Kcnn1       | potassium intermediate/small conductance calcium-activated channel, subfamily N, member 1                                                                                                                                                | Mm.32074.1                      | 6.2                                    | 5.6                                    | -1.52                      | 0.03             |
| 1452300_at    | Rmdn1       | regulator of microtubule dynamics 1                                                                                                                                                                                                      | Mm.78312.1                      | 3.8                                    | 3.2                                    | -1.52                      | 0.01             |
| 1452718_at    | Ubr5        | ubiquitin protein ligase E3 component n-recogin 5                                                                                                                                                                                        | Mm.7361.1                       | 10.3                                   | 9.7                                    | -1.52                      | 0.00             |
| 1452973_at    | Ppm1k       | protein phosphatase 1K (PP2C domain containing)                                                                                                                                                                                          | Mm.46011.1                      | 10.4                                   | 9.8                                    | -1.52                      | 0.01             |
| 1453017_at    | Ankle2      | ankyrin repeat and LEM domain containing 2                                                                                                                                                                                               | Mm.103407.1                     | 7.5                                    | 6.9                                    | -1.52                      | 0.00             |
| 1455351_at    | U2surp      | U2 snRNP-associated SURP domain containing                                                                                                                                                                                               | Mm.27137.1                      | 7.1                                    | 6.5                                    | -1.52                      | 0.00             |
| 1455491_at    | Hnrnp3      | heterogeneous nuclear ribonucleoprotein H3                                                                                                                                                                                               | Mm.28070.1                      | 7.8                                    | 7.2                                    | -1.52                      | 0.00             |
| 1455759_a_at  | Ankhd1      | ankyrin repeat and KH domain containing 1; multiple ankyrin repeats single KH domain binding protein 3                                                                                                                                   | Mm.28671.2                      | 6.4                                    | 5.8                                    | -1.52                      | 0.00             |
| 1455805_x_at  | Ccdc22      | coiled-coil domain containing 22                                                                                                                                                                                                         | Mm.182291.3                     | 6.5                                    | 5.9                                    | -1.52                      | 0.01             |
| 1456181_at    | Wdr91       | WD repeat domain 91                                                                                                                                                                                                                      | Mm.44185.1                      | 7.7                                    | 7.1                                    | -1.52                      | 0.00             |
| 1456521_at    |             | nuclear receptor subfamily 5, group A, member 2                                                                                                                                                                                          | Mm.24295.1                      | 9.7                                    | 9.1                                    | -1.52                      | 0.00             |
| 1456541_x_at  | Atad3a      | ATPase family, AAA domain containing 3A                                                                                                                                                                                                  | Mm.21881.4                      | 7.9                                    | 7.3                                    | -1.52                      | 0.03             |
| 1458295_at    | BC038331    | cDNA sequence BC038331                                                                                                                                                                                                                   | Mm.78325.1                      | 6.5                                    | 5.9                                    | -1.52                      | 0.01             |
| 1459679_s_at  | Myo1b       | myosin IB                                                                                                                                                                                                                                | Mm.200345.1                     | 10.1                                   | 9.5                                    | -1.52                      | 0.00             |
| 1460580_at    | Pcnx        | pecanex homolog (Drosophila)                                                                                                                                                                                                             | Mm.22991.1                      | 7.7                                    | 7.1                                    | -1.52                      | 0.01             |
| 1460655_a_at  | Ubp1        | upstream binding protein 1                                                                                                                                                                                                               | Mm.28052.1                      | 7.7                                    | 7.1                                    | -1.52                      | 0.01             |
| 1416042_s_at  | Nasp        | nuclear autoantigenic sperm protein (histone-binding)                                                                                                                                                                                    | Mm.7516.1                       | 7.6                                    | 7.0                                    | -1.53                      | 0.01             |
| 1417783_at    | Als2        | amyotrophic lateral sclerosis 2 (juvenile)                                                                                                                                                                                               | Mm.30114.1                      | 10.3                                   | 9.7                                    | -1.53                      | 0.00             |
| 1418607_at    | Zkscan14    | zinc finger with KRAB and SCAN domains 14                                                                                                                                                                                                | Mm.26782.1                      | 7.3                                    | 6.7                                    | -1.53                      | 0.01             |



**Supplemental Table 9. Significant differently expressed genes in 3bKI HCC samples**

| Affymetrix ID | Gene Symbol  | Description                                                                                    | Transcript ID<br>(Array Design) | 3aKO<br>avg<br>signal<br>log2<br>(n=4) | 3bKI<br>Avg<br>Signal<br>log2<br>(n=5) | Fold<br>Change<br>(linear) | ANOVA<br>p-value |
|---------------|--------------|------------------------------------------------------------------------------------------------|---------------------------------|----------------------------------------|----------------------------------------|----------------------------|------------------|
| 1419951_at    | Lman1        | lectin, mannose-binding, 1                                                                     | Mm.28142.1                      | 7.5                                    | 6.9                                    | -1.53                      | 0.00             |
| 1420142_s_at  | Pa2g4        | proliferation-associated 2G4                                                                   | Mm.199839.1                     | 8.7                                    | 8.1                                    | -1.53                      | 0.00             |
| 1420487_at    | Nol7         | nucleolar protein 7                                                                            | Mm.142195.1                     | 6.2                                    | 5.6                                    | -1.53                      | 0.02             |
| 1422882_at    | Sypl         | synaptophysin-like protein                                                                     | Mm.45146.1                      | 6.7                                    | 6.1                                    | -1.53                      | 0.00             |
| 1426345_at    | Prepl        | prolyl endopeptidase-like                                                                      | Mm.18300.2                      | 8.3                                    | 7.7                                    | -1.53                      | 0.00             |
| 1426994_at    | Phlpp1       | PH domain and leucine rich repeat<br>protein phosphatase 1                                     | Mm.24115.1                      | 8.6                                    | 8.0                                    | -1.53                      | 0.01             |
| 1428467_at    | Tardbp       | TAR DNA binding protein                                                                        | Mm.22453.1                      | 7.3                                    | 6.7                                    | -1.53                      | 0.01             |
| 1428941_at    | Zmym2        | zinc finger, MYM-type 2                                                                        | Mm.31417.1                      | 5.5                                    | 4.9                                    | -1.53                      | 0.01             |
| 1429121_at    | Spopl        | speckle-type POZ protein-like                                                                  | Mm.101788.1                     | 6.2                                    | 5.6                                    | -1.53                      | 0.01             |
| 1429463_at    | Prkaa2       | protein kinase, AMP-activated, alpha<br>2 catalytic subunit                                    | Mm.48638.1                      | 9.8                                    | 9.1                                    | -1.53                      | 0.00             |
| 1429504_at    | Amy1         | amylase 1, salivary; RNA-binding<br>region (RNP1, RRM) containing 3                            | Mm.181446.1                     | 4.5                                    | 3.8                                    | -1.53                      | 0.01             |
| 1431226_a_at  | Fndc4        | fibronectin type III domain containing<br>4                                                    | Mm.40009.2                      | 9.1                                    | 8.5                                    | -1.53                      | 0.01             |
| 1433503_at    | Ptgr2        | prostaglandin reductase 2                                                                      | Mm.41320.1                      | 9.4                                    | 8.8                                    | -1.53                      | 0.00             |
| 1434391_at    | AI503316     | expressed sequence AI503316;<br>heterogeneous nuclear<br>ribonucleoprotein U                   | Mm.28927.2                      | 8.3                                    | 7.7                                    | -1.53                      | 0.00             |
| 1434721_at    | Ankle2       | ankyrin repeat and LEM domain<br>containing 2                                                  | Mm.37551.1                      | 7.9                                    | 7.3                                    | -1.53                      | 0.00             |
| 1435551_at    | Fhod3        | formin homology 2 domain<br>containing 3                                                       | Mm.28387.1                      | 4.8                                    | 4.2                                    | -1.53                      | 0.02             |
| 1435559_at    | Myo6         | myosin VI                                                                                      | Mm.28931.1                      | 6.8                                    | 6.2                                    | -1.53                      | 0.02             |
| 1435711_at    | LOC100503186 | expressed sequence AI480526                                                                    | Mm.32658.1                      | 7.3                                    | 6.7                                    | -1.53                      | 0.03             |
| 1436597_at    | Ankhd1       | ankyrin repeat and KH domain<br>containing 1                                                   | Mm.28671.2                      | 6.3                                    | 5.7                                    | -1.53                      | 0.00             |
| 1436898_at    | Sfpq         | splicing factor proline/glutamine rich<br>(polypyrimidine tract binding protein<br>associated) | Mm.43213.3                      | 8.1                                    | 7.5                                    | -1.53                      | 0.01             |
| 1437856_at    | Ipmk         | inositol polyphosphate multikinase                                                             | Mm.12055.2                      | 8.5                                    | 7.9                                    | -1.53                      | 0.00             |
| 1438006_at    | Gid4         | GID complex subunit 4, VID24<br>homolog ( <i>S. cerevisiae</i> )                               | Mm.29950.3                      | 8.6                                    | 8.0                                    | -1.53                      | 0.00             |
| 1440195_at    | Serbp1       | serpine1 mRNA binding protein 1                                                                | Mm.117943.1                     | 6.6                                    | 6.0                                    | -1.53                      | 0.00             |
| 1440573_at    | Gm2590       | predicted gene 2590                                                                            | Mm.209864.1                     | 6.5                                    | 5.9                                    | -1.53                      | 0.00             |
| 1440993_at    | AW111846     |                                                                                                | Mm.36341.1                      | 11.4                                   | 10.8                                   | -1.53                      | 0.00             |
| 1444037_at    | Lman1        | lectin, mannose-binding, 1                                                                     | Mm.152817.1                     | 6.5                                    | 5.9                                    | -1.53                      | 0.01             |
| 1448717_at    | Gcdh         | glutaryl-Coenzyme A dehydrogenase                                                              | Mm.2475.1                       | 11.3                                   | 10.7                                   | -1.53                      | 0.01             |
| 1452868_at    | Usp24        | ubiquitin specific peptidase 24                                                                | Mm.148342.1                     | 8.6                                    | 7.9                                    | -1.53                      | 0.00             |
| 1452977_at    | Zhx3         | zinc fingers and homeoboxes 3                                                                  | Mm.70619.1                      | 9.0                                    | 8.4                                    | -1.53                      | 0.00             |
| 1455073_at    | Cdadc1       | cytidine and dCMP deaminase<br>domain containing 1                                             | Mm.203878.1                     | 8.4                                    | 7.8                                    | -1.53                      | 0.00             |
| 1457510_at    |              |                                                                                                | Mm.132324.1                     | 5.2                                    | 4.6                                    | -1.53                      | 0.00             |
| 1459874_s_at  | Mtmr4        | myotubularin related protein 4                                                                 | Mm.78770.1                      | 8.6                                    | 8.0                                    | -1.53                      | 0.02             |
| 1460244_at    | Upb1         | ureidopropionase, beta                                                                         | Mm.25557.1                      | 12.4                                   | 11.8                                   | -1.53                      | 0.00             |

**Supplemental Table 9. Significant differently expressed genes in 3bKI HCC samples**

| Affymetrix ID | Gene Symbol   | Description                                                                  | Transcript ID<br>(Array Design) | 3aKO<br>avg<br>signal<br>log2<br>(n=4) | 3bKI<br>Avg<br>Signal<br>log2<br>(n=5) | Fold<br>Change<br>(linear) | ANOVA<br>p-value |
|---------------|---------------|------------------------------------------------------------------------------|---------------------------------|----------------------------------------|----------------------------------------|----------------------------|------------------|
| 1460633_at    | Prpf19        | PRP19/PSO4 pre-mRNA processing factor 19 homolog (S. cerevisiae)             | Mm.29835.1                      | 9.0                                    | 8.4                                    | -1.53                      | 0.03             |
| 1416731_at    | Top2b         | topoisomerase (DNA) II beta                                                  | Mm.4093.1                       | 8.6                                    | 7.9                                    | -1.54                      | 0.01             |
| 1419158_a_at  | Hars2         | histidyl-tRNA synthetase 2, mitochondrial (putative)                         | Mm.46741.1                      | 8.6                                    | 8.0                                    | -1.54                      | 0.00             |
| 1419301_at    | Fzd4          | frizzled homolog 4 (Drosophila)                                              | Mm.68712.1                      | 7.8                                    | 7.2                                    | -1.54                      | 0.01             |
| 1419977_s_at  | Esrp2         | epithelial splicing regulatory protein 2                                     | Mm.10285.1                      | 6.9                                    | 6.3                                    | -1.54                      | 0.00             |
| 1423169_at    | Taf7          | TAF7 RNA polymerase II, TATA box binding protein (TBP)-associated factor     | Mm.12001.1                      | 5.9                                    | 5.2                                    | -1.54                      | 0.00             |
| 1423411_at    | Rbm47         | RNA binding motif protein 47                                                 | Mm.36863.1                      | 8.0                                    | 7.4                                    | -1.54                      | 0.00             |
| 1424166_at    | Msh3          | mutS homolog 3 (E. coli)                                                     | Mm.116254.2                     | 7.4                                    | 6.8                                    | -1.54                      | 0.00             |
| 1425821_at    | Clcn7         | chloride channel 7                                                           | Mm.190634.1                     | 5.4                                    | 4.7                                    | -1.54                      | 0.01             |
| 1426840_at    | Ythdf3        | YTH domain family 3                                                          | Mm.23834.1                      | 8.7                                    | 8.0                                    | -1.54                      | 0.00             |
| 1426881_at    | Ube3c         | ubiquitin protein ligase E3C                                                 | Mm.28711.1                      | 8.2                                    | 7.5                                    | -1.54                      | 0.00             |
| 1426884_at    | Rmnd5a        | required for meiotic nuclear division 5 homolog A (S. cerevisiae)            | Mm.28474.1                      | 11.1                                   | 10.5                                   | -1.54                      | 0.00             |
| 1427075_s_at  | Pcmt2         | protein-L-isoaspartate (D-aspartate) O-methyltransferase domain containing 2 | Mm.29308.1                      | 6.6                                    | 6.0                                    | -1.54                      | 0.00             |
| 1429083_at    | Agl           | amylo-1,6-glucosidase, 4-alpha-glucanotransferase                            | Mm.41348.1                      | 8.3                                    | 7.7                                    | -1.54                      | 0.03             |
| 1429094_at    | Ddi2          | DNA-damage inducible protein 2                                               | Mm.40897.1                      | 9.1                                    | 8.5                                    | -1.54                      | 0.03             |
| 1430130_at    | Vwce          | von Willebrand factor C and EGF domains                                      | Mm.169261.1                     | 8.8                                    | 8.2                                    | -1.54                      | 0.03             |
| 1430798_x_at  | Mrpl15        | mitochondrial ribosomal protein L15                                          | Mm.29904.2                      | 7.4                                    | 6.8                                    | -1.54                      | 0.00             |
| 1431792_a_at  | Stk11ip       | serine/threonine kinase 11 interacting protein                               | Mm.3463.1                       | 6.3                                    | 5.7                                    | -1.54                      | 0.00             |
| 1432099_a_at  | Prodh2        | proline dehydrogenase (oxidase) 2                                            | Mm.182309.2                     | 11.3                                   | 10.7                                   | -1.54                      | 0.00             |
| 1433203_at    | 6030400A10Rik | RIKEN cDNA 6030400A10 gene                                                   | Mm.159840.1                     | 7.0                                    | 6.4                                    | -1.54                      | 0.01             |
| 1434842_s_at  | Upf3b         | UPF3 regulator of nonsense transcripts homolog B (yeast)                     | Mm.5935.1                       | 8.7                                    | 8.1                                    | -1.54                      | 0.00             |
| 1434970_a_at  | Mrpl15        | mitochondrial ribosomal protein L15                                          | Mm.29904.4                      | 10.0                                   | 9.4                                    | -1.54                      | 0.00             |
| 1435150_at    |               |                                                                              | Mm.97269.1                      | 4.2                                    | 3.6                                    | -1.54                      | 0.02             |
| 1435574_at    |               |                                                                              | Mm.128892.1                     | 5.0                                    | 4.4                                    | -1.54                      | 0.03             |
| 1437181_at    | Peli2         | pellino 2                                                                    | Mm.17370.1                      | 7.4                                    | 6.8                                    | -1.54                      | 0.02             |
| 1437590_at    | Pyroxd2       | pyridine nucleotide-disulphide oxidoreductase domain 2                       | Mm.212966.1                     | 7.8                                    | 7.1                                    | -1.54                      | 0.00             |
| 1438637_x_at  | Sf3b2         | splicing factor 3b, subunit 2                                                | Mm.1668.7                       | 8.7                                    | 8.1                                    | -1.54                      | 0.00             |
| 1438809_at    | Atp5c1        | ATP synthase, H+ transporting, mitochondrial F1 complex, gamma polypeptide 1 | Mm.12677.5                      | 7.2                                    | 6.5                                    | -1.54                      | 0.04             |
| 1439144_at    | Cwf1911       | CWF19-like 1, cell cycle control (S. pombe)                                  | Mm.93826.1                      | 7.2                                    | 6.6                                    | -1.54                      | 0.01             |
| 1440198_at    |               |                                                                              | Mm.82435.1                      | 3.9                                    | 3.2                                    | -1.54                      | 0.05             |

**Supplemental Table 9. Significant differently expressed genes in 3bKI HCC samples**

| Affymetrix ID | Gene Symbol   | Description                                                                                       | Transcript ID<br>(Array Design) | 3aKO<br>avg<br>signal<br>log2<br>(n=4) | 3bKI<br>Avg<br>Signal<br>log2<br>(n=5) | Fold<br>Change<br>(linear) | ANOVA<br>p-value |
|---------------|---------------|---------------------------------------------------------------------------------------------------|---------------------------------|----------------------------------------|----------------------------------------|----------------------------|------------------|
| 1440260_at    | Ccdc58        | coiled-coil domain containing 58                                                                  | Mm.102774.1                     | 5.6                                    | 5.0                                    | -1.54                      | 0.02             |
| 1443355_at    |               |                                                                                                   | Mm.120898.1                     | 6.1                                    | 5.5                                    | -1.54                      | 0.04             |
| 1444171_at    |               |                                                                                                   | Mm.213038.1                     | 6.5                                    | 5.9                                    | -1.54                      | 0.00             |
| 1448761_a_at  | Copg2         | coatomer protein complex, subunit gamma 2                                                         | Mm.39896.1                      | 8.0                                    | 7.4                                    | -1.54                      | 0.00             |
| 1449006_at    | Gla           | galactosidase, alpha                                                                              | Mm.1114.1                       | 5.3                                    | 4.7                                    | -1.54                      | 0.01             |
| 1449014_at    | Lactb         | lactamase, beta                                                                                   | Mm.157882.1                     | 9.4                                    | 8.8                                    | -1.54                      | 0.02             |
| 1452262_at    | Grpel2        | GrpE-like 2, mitochondrial                                                                        | Mm.12959.1                      | 9.0                                    | 8.3                                    | -1.54                      | 0.01             |
| 1452944_at    | Afmid         | arylformamidase                                                                                   | Mm.30192.1                      | 11.1                                   | 10.5                                   | -1.54                      | 0.00             |
| 1453216_at    | Gpt           | glutamic pyruvic transaminase, soluble                                                            | Mm.178753.1                     | 8.7                                    | 8.0                                    | -1.54                      | 0.02             |
| 1453277_at    | 3021401N23Rik | RIKEN cDNA 3021401N23 gene                                                                        | Mm.149413.1                     | 4.6                                    | 4.0                                    | -1.54                      | 0.01             |
| 1455134_at    | Tmem245       | transmembrane protein 245                                                                         | Mm.31787.1                      | 7.8                                    | 7.2                                    | -1.54                      | 0.01             |
| 1455189_at    | Trim33        | tripartite motif-containing 33                                                                    | Mm.100128.1                     | 7.0                                    | 6.4                                    | -1.54                      | 0.00             |
| 1455218_at    | Ccp110        | centriolar coiled coil protein 110                                                                | Mm.23279.1                      | 5.9                                    | 5.2                                    | -1.54                      | 0.01             |
| 1455668_at    | Whsc1l1       | Wolf-Hirschhorn syndrome candidate 1-like 1 (human)                                               | Mm.71065.1                      | 8.2                                    | 7.6                                    | -1.54                      | 0.01             |
| 1456662_at    | AA386476      | expressed sequence AA386476                                                                       | Mm.45721.1                      | 4.8                                    | 4.1                                    | -1.54                      | 0.01             |
| 1457287_at    |               |                                                                                                   | Mm.30907.1                      | 8.7                                    | 8.1                                    | -1.54                      | 0.00             |
| 1457751_at    | Rsf1          | remodeling and spacing factor 1                                                                   | Mm.43977.1                      | 6.6                                    | 6.0                                    | -1.54                      | 0.00             |
| 1458585_at    |               |                                                                                                   | Mm.33549.1                      | 6.1                                    | 5.5                                    | -1.54                      | 0.00             |
| 1415902_at    | Aldh7a1       | aldehyde dehydrogenase family 7, member A1                                                        | Mm.30250.1                      | 6.7                                    | 6.1                                    | -1.55                      | 0.01             |
| 1418996_a_at  | Lym5          | LYR motif containing 5                                                                            | Mm.46847.1                      | 11.0                                   | 10.4                                   | -1.55                      | 0.01             |
| 1421029_a_at  | Hbs1l         | Hbs1-like (S. cerevisiae)                                                                         | Mm.28882.1                      | 9.6                                    | 8.9                                    | -1.55                      | 0.00             |
| 1421035_a_at  | Magi3         | membrane associated guanylate kinase, WW and PDZ domain containing 3                              | Mm.149760.1                     | 6.9                                    | 6.3                                    | -1.55                      | 0.00             |
| 1422780_at    | Pxmp4         | peroxisomal membrane protein 4                                                                    | Mm.24673.1                      | 10.3                                   | 9.7                                    | -1.55                      | 0.00             |
| 1423170_at    | Taf7          | TAF7 RNA polymerase II, TATA box binding protein (TBP)-associated factor                          | Mm.12001.1                      | 6.3                                    | 5.6                                    | -1.55                      | 0.00             |
| 1428382_at    | Smarcc2       | SWI/SNF related, matrix associated, actin dependent regulator of chromatin, subfamily c, member 2 | Mm.24449.1                      | 8.9                                    | 8.3                                    | -1.55                      | 0.00             |
| 1430863_at    | 4933411B09Rik | RIKEN cDNA 4933411B09 gene                                                                        | Mm.67563.1                      | 5.1                                    | 4.5                                    | -1.55                      | 0.02             |
| 1434041_at    | Appbp2        | amyloid beta precursor protein (cytoplasmic tail) binding protein 2                               | Mm.86454.1                      | 6.5                                    | 5.9                                    | -1.55                      | 0.00             |
| 1434337_at    | Cmtm4         | CKLF-like MARVEL transmembrane domain containing 4                                                | Mm.24881.1                      | 10.0                                   | 9.3                                    | -1.55                      | 0.00             |
| 1434486_x_at  | Ugp2          | UDP-glucose pyrophosphorylase 2                                                                   | Mm.28877.4                      | 10.8                                   | 10.1                                   | -1.55                      | 0.00             |
| 1434681_at    | Txlng         | taxilin gamma                                                                                     | Mm.1603.3                       | 8.5                                    | 7.9                                    | -1.55                      | 0.00             |
| 1435664_at    | Zfp397        | zinc finger protein 397                                                                           | Mm.46024.1                      | 6.6                                    | 6.0                                    | -1.55                      | 0.01             |
| 1436229_at    | Fam126b       | family with sequence similarity 126, member B                                                     | Mm.94709.1                      | 7.4                                    | 6.8                                    | -1.55                      | 0.00             |

**Supplemental Table 9. Significant differently expressed genes in 3bKI HCC samples**

| Affymetrix ID | Gene Symbol   | Description                                                                                                                                     | Transcript ID<br>(Array Design) | 3aKO<br>avg<br>signal<br>log2<br>(n=4) | 3bKI<br>Avg<br>Signal<br>log2<br>(n=5) | Fold<br>Change<br>(linear) | ANOVA<br>p-value |
|---------------|---------------|-------------------------------------------------------------------------------------------------------------------------------------------------|---------------------------------|----------------------------------------|----------------------------------------|----------------------------|------------------|
| 1436427_at    | Prpf4b        | PRP4 pre-mRNA processing factor 4<br>homolog B (yeast)                                                                                          | Mm.10027.3                      | 8.2                                    | 7.6                                    | <b>-1.55</b>               | 0.00             |
| 1437067_at    | Phtf2         | putative homeodomain transcription<br>factor 2                                                                                                  | Mm.3028.1                       | 5.9                                    | 5.2                                    | <b>-1.55</b>               | 0.01             |
| 1437600_at    |               |                                                                                                                                                 | Mm.129295.1                     | 6.6                                    | 6.0                                    | <b>-1.55</b>               | 0.01             |
| 1440016_at    |               |                                                                                                                                                 | Mm.103039.1                     | 4.5                                    | 3.8                                    | <b>-1.55</b>               | 0.01             |
| 1440027_at    | Mon2          | MON2 homolog (yeast)                                                                                                                            | Mm.23191.1                      | 5.8                                    | 5.2                                    | <b>-1.55</b>               | 0.00             |
| 1440896_at    |               |                                                                                                                                                 | Mm.133061.1                     | 6.7                                    | 6.0                                    | <b>-1.55</b>               | 0.01             |
| 1441842_s_at  | Zfp707        | zinc finger protein 707                                                                                                                         | Mm.141644.1                     | 6.9                                    | 6.3                                    | <b>-1.55</b>               | 0.01             |
| 1442911_at    |               |                                                                                                                                                 | Mm.218423.1                     | 5.0                                    | 4.4                                    | <b>-1.55</b>               | 0.01             |
| 1443206_at    |               |                                                                                                                                                 | Mm.182861.1                     | 6.3                                    | 5.7                                    | <b>-1.55</b>               | 0.04             |
| 1443466_s_at  | Polr3b        | polymerase (RNA) III (DNA directed)<br>polypeptide B                                                                                            | Mm.200932.1                     | 7.5                                    | 6.9                                    | <b>-1.55</b>               | 0.00             |
| 1443708_at    | BC068281      | cDNA sequence BC068281                                                                                                                          | Mm.214691.1                     | 6.1                                    | 5.5                                    | <b>-1.55</b>               | 0.00             |
| 1443857_at    | Hook3         | hook homolog 3 (Drosophila)                                                                                                                     | Mm.63527.1                      | 6.4                                    | 5.7                                    | <b>-1.55</b>               | 0.00             |
| 1451848_a_at  | Cryz          | crystallin, zeta                                                                                                                                | Mm.3534.2                       | 10.6                                   | 9.9                                    | <b>-1.55</b>               | 0.02             |
| 1452025_a_at  | Zfp2          | zinc finger protein 2                                                                                                                           | Mm.4958.2                       | 4.3                                    | 3.7                                    | <b>-1.55</b>               | 0.00             |
| 1454735_at    | Odf2          | outer dense fiber of sperm tails 2                                                                                                              | Mm.24261.1                      | 7.9                                    | 7.2                                    | <b>-1.55</b>               | 0.00             |
| 1454842_a_at  | B3galnt2      | UDP-GalNAc:betaGlcNAc beta 1,3-<br>galactosaminyltransferase,<br>polypeptide 2                                                                  | Mm.21686.1                      | 4.7                                    | 4.1                                    | <b>-1.55</b>               | 0.01             |
| 1454843_at    | Prps2         | phosphoribosyl pyrophosphate<br>synthetase 2                                                                                                    | Mm.30784.1                      | 9.6                                    | 9.0                                    | <b>-1.55</b>               | 0.05             |
| 1455254_at    | 4833420G11Rik | GID complex subunit 8 homolog (S.<br>cerevisiae)                                                                                                | Mm.29561.2                      | 9.1                                    | 8.5                                    | <b>-1.55</b>               | 0.00             |
| 1455435_s_at  | Chdh          | choline dehydrogenase                                                                                                                           | Mm.9772.3                       | 10.6                                   | 10.0                                   | <b>-1.55</b>               | 0.00             |
| 1456386_at    |               | RNA binding motif protein 39                                                                                                                    | Mm.17307.3                      | 7.1                                    | 6.5                                    | <b>-1.55</b>               | 0.01             |
| 1456395_at    | Ppargc1a      | peroxisome proliferative activated<br>receptor, gamma, coactivator 1<br>alpha                                                                   | Mm.10707.3                      | 7.1                                    | 6.4                                    | <b>-1.55</b>               | 0.04             |
| 1456630_x_at  | Son           | Son DNA binding protein                                                                                                                         | Mm.46401.3                      | 6.0                                    | 5.3                                    | <b>-1.55</b>               | 0.00             |
| 1457141_at    |               |                                                                                                                                                 | Mm.180664.1                     | 7.7                                    | 7.1                                    | <b>-1.55</b>               | 0.02             |
| 1460325_at    | Pum1          | pumilio RNA-binding family member<br>1                                                                                                          | Mm.34701.1                      | 8.1                                    | 7.5                                    | <b>-1.55</b>               | 0.00             |
| 1460577_at    | Jmy           | junction-mediating and regulatory<br>protein                                                                                                    | Mm.73671.1                      | 8.0                                    | 7.3                                    | <b>-1.55</b>               | 0.00             |
| 1415917_at    | Mthfd1        | methylenetetrahydrofolate<br>dehydrogenase (NADP+ dependent),<br>methenyltetrahydrofolate<br>cyclohydrolase,<br>formyltetrahydrofolate synthase | Mm.29584.1                      | 11.8                                   | 11.1                                   | <b>-1.56</b>               | 0.00             |
| 1417754_at    | Topors        | topoisomerase I binding,<br>arginine/serine-rich                                                                                                | Mm.39006.1                      | 7.9                                    | 7.2                                    | <b>-1.56</b>               | 0.00             |
| 1422461_at    | Atad3a        | ATPase family, AAA domain<br>containing 3A                                                                                                      | Mm.21881.1                      | 9.0                                    | 8.3                                    | <b>-1.56</b>               | 0.00             |

**Supplemental Table 9. Significant differently expressed genes in 3bKI HCC samples**

| Affymetrix ID | Gene Symbol   | Description                                                                                                  | Transcript ID<br>(Array Design) | 3aKO<br>avg<br>signal<br>log2<br>(n=4) | 3bKI<br>Avg<br>Signal<br>log2<br>(n=5) | Fold<br>Change<br>(linear) | ANOVA<br>p-value |
|---------------|---------------|--------------------------------------------------------------------------------------------------------------|---------------------------------|----------------------------------------|----------------------------------------|----------------------------|------------------|
| 1423108_at    | Slc25a20      | solute carrier family 25<br>(mitochondrial carnitine/acylcarnitine<br>translocase), member 20                | Mm.29666.1                      | 11.1                                   | 10.5                                   | <b>-1.56</b>               | 0.04             |
| 1423995_at    | Kif1b         | kinesin family member 1B                                                                                     | Mm.42027.1                      | 8.3                                    | 7.7                                    | <b>-1.56</b>               | 0.01             |
| 1424583_at    | Farp2         | FERM, RhoGEF and pleckstrin<br>domain protein 2                                                              | Mm.192479.1                     | 7.1                                    | 6.4                                    | <b>-1.56</b>               | 0.00             |
| 1424738_at    | Ap5m1         | adaptor-related protein complex 5,<br>mu 1 subunit                                                           | Mm.87037.1                      | 7.6                                    | 7.0                                    | <b>-1.56</b>               | 0.00             |
| 1425088_at    | Scnn1a        | sodium channel, nonvoltage-gated 1<br>alpha                                                                  | Mm.144114.1                     | 8.4                                    | 7.7                                    | <b>-1.56</b>               | 0.04             |
| 1425557_x_at  | Tsc22d3       | TSC22 domain family, member 3                                                                                | Mm.22216.3                      | 7.6                                    | 7.0                                    | <b>-1.56</b>               | 0.00             |
| 1426781_at    | Tyw1          | tRNA-yW synthesizing protein 1<br>homolog ( <i>S. cerevisiae</i> )                                           | Mm.38464.1                      | 6.7                                    | 6.0                                    | <b>-1.56</b>               | 0.03             |
| 1426879_at    | Trmt1l        | tRNA methyltransferase 1 like                                                                                | Mm.45758.1                      | 8.1                                    | 7.5                                    | <b>-1.56</b>               | 0.00             |
| 1429040_at    | 6820431F20Rik | cadherin 11 pseudogene                                                                                       | Mm.1571.1                       | 8.3                                    | 7.7                                    | <b>-1.56</b>               | 0.01             |
| 1431232_a_at  | Mga           | MAX gene associated                                                                                          | Mm.87532.2                      | 6.1                                    | 5.4                                    | <b>-1.56</b>               | 0.00             |
| 1434108_at    | Fbxo11        | F-box protein 11                                                                                             | Mm.18210.2                      | 7.2                                    | 6.6                                    | <b>-1.56</b>               | 0.02             |
| 1436303_at    | Mllt4         | myeloid/lymphoid or mixed-lineage<br>leukemia (trithorax homolog,<br><i>Drosophila</i> ); translocated to, 4 | Mm.35797.1                      | 9.1                                    | 8.5                                    | <b>-1.56</b>               | 0.00             |
| 1436544_at    | Atp10d        | ATPase, class V, type 10D                                                                                    | Mm.30781.1                      | 7.0                                    | 6.4                                    | <b>-1.56</b>               | 0.05             |
| 1437064_at    | Ar            | androgen receptor                                                                                            | Mm.133787.1                     | 8.4                                    | 7.8                                    | <b>-1.56</b>               | 0.01             |
| 1438236_at    | Nfia          | nuclear factor I/A                                                                                           | Mm.31274.2                      | 7.9                                    | 7.2                                    | <b>-1.56</b>               | 0.00             |
| 1443046_at    | Abcd3         | ATP-binding cassette, sub-family D<br>(ALD), member 3                                                        | Mm.194462.1                     | 5.3                                    | 4.6                                    | <b>-1.56</b>               | 0.00             |
| 1444021_at    | Sqstm1        | sequestosome 1                                                                                               | Mm.148901.1                     | 6.2                                    | 5.6                                    | <b>-1.56</b>               | 0.00             |
| 1444057_at    |               |                                                                                                              | Mm.156169.1                     | 4.6                                    | 3.9                                    | <b>-1.56</b>               | 0.02             |
| 1445765_at    | 9430011C21Rik | RIKEN cDNA 9430011C21 gene                                                                                   | Mm.208023.1                     | 6.6                                    | 5.9                                    | <b>-1.56</b>               | 0.01             |
| 1445831_at    |               |                                                                                                              | Mm.173456.1                     | 7.7                                    | 7.0                                    | <b>-1.56</b>               | 0.03             |
| 1447310_at    | Agphd1        | hydroxylysine kinase 1                                                                                       | Mm.23202.1                      | 8.1                                    | 7.4                                    | <b>-1.56</b>               | 0.04             |
| 1447750_x_at  | Pih1d1        | PIH1 domain containing 1                                                                                     | Mm.82139.1                      | 7.9                                    | 7.3                                    | <b>-1.56</b>               | 0.00             |
| 1448889_at    | Slc38a4       | solute carrier family 38, member 4                                                                           | Mm.180455.1                     | 13.1                                   | 12.4                                   | <b>-1.56</b>               | 0.03             |
| 1450396_at    | Stag2         | stromal antigen 2                                                                                            | Mm.24025.1                      | 8.0                                    | 7.4                                    | <b>-1.56</b>               | 0.00             |
| 1450400_at    | Tgs1          | trimethylguanosine synthase<br>homolog ( <i>S. cerevisiae</i> )                                              | Mm.34104.1                      | 6.9                                    | 6.3                                    | <b>-1.56</b>               | 0.00             |
| 1452532_x_at  | Ceacam1       | carcinoembryonic antigen-related<br>cell adhesion molecule 1                                                 | Mm.14114.7                      | 9.9                                    | 9.3                                    | <b>-1.56</b>               | 0.00             |
| 1452986_at    | Hgd           | homogentisate 1, 2-dioxygenase                                                                               | Mm.157442.1                     | 13.1                                   | 12.4                                   | <b>-1.56</b>               | 0.00             |
| 1453332_at    | Trappc13      | trafficking protein particle complex<br>13                                                                   | Mm.76059.1                      | 5.0                                    | 4.4                                    | <b>-1.56</b>               | 0.02             |
| 1454769_at    | Tatdn2        | TatD DNase domain containing 2                                                                               | Mm.73402.1                      | 7.0                                    | 6.3                                    | <b>-1.56</b>               | 0.01             |
| 1456200_at    | lpmk          | inositol polyphosphate multikinase                                                                           | Mm.12055.2                      | 8.6                                    | 7.9                                    | <b>-1.56</b>               | 0.00             |
| 1457017_at    | Rmdn1         | regulator of microtubule dynamics 1                                                                          | Mm.168010.1                     | 4.2                                    | 3.5                                    | <b>-1.56</b>               | 0.00             |
| 1457568_at    | Hnrnpd        | heterogeneous nuclear<br>ribonucleoprotein D                                                                 | Mm.150231.1                     | 6.1                                    | 5.5                                    | <b>-1.56</b>               | 0.01             |

**Supplemental Table 9. Significant differently expressed genes in 3bKI HCC samples**

| Affymetrix ID | Gene Symbol   | Description                                                                                       | Transcript ID<br>(Array Design) | 3aKO<br>avg<br>signal<br>log2<br>(n=4) | 3bKI<br>Avg<br>Signal<br>log2<br>(n=5) | Fold<br>Change<br>(linear) | ANOVA<br>p-value |
|---------------|---------------|---------------------------------------------------------------------------------------------------|---------------------------------|----------------------------------------|----------------------------------------|----------------------------|------------------|
| 1416375_at    | Ap3m1         | adaptor-related protein complex 3, mu 1 subunit                                                   | Mm.3256.1                       | 8.4                                    | 7.7                                    | <b>-1.57</b>               | 0.02             |
| 1418238_at    | Ivd           | isovaleryl coenzyme A dehydrogenase                                                               | Mm.6635.1                       | 10.9                                   | 10.3                                   | <b>-1.57</b>               | 0.00             |
| 1419288_at    | Jam2          | junction adhesion molecule 2                                                                      | Mm.41758.1                      | 7.4                                    | 6.7                                    | <b>-1.57</b>               | 0.01             |
| 1420059_at    | Mtfr1l        | mitochondrial fission regulator 1-like                                                            | Mm.198745.1                     | 6.7                                    | 6.1                                    | <b>-1.57</b>               | 0.00             |
| 1420132_s_at  | Pttg1ip       | pituitary tumor-transforming 1 interacting protein                                                | Mm.199914.1                     | 7.4                                    | 6.7                                    | <b>-1.57</b>               | 0.00             |
| 1423309_at    | Tgoln1        | trans-golgi network protein; trans-golgi network protein 2                                        | Mm.141187.1                     | 11.3                                   | 10.7                                   | <b>-1.57</b>               | 0.02             |
| 1423416_at    | Smarcc1       | SWI/SNF related, matrix associated, actin dependent regulator of chromatin, subfamily c, member 1 | Mm.1050.1                       | 8.0                                    | 7.3                                    | <b>-1.57</b>               | 0.00             |
| 1423889_at    | Gm5617        | predicted gene 5617                                                                               | Mm.220921.2                     | 9.3                                    | 8.6                                    | <b>-1.57</b>               | 0.02             |
| 1424589_s_at  | Rnpc3         | RNA-binding region (RNP1, RRM) containing 3                                                       | Mm.58104.1                      | 5.8                                    | 5.2                                    | <b>-1.57</b>               | 0.00             |
| 1428011_a_at  | Erb2ip        | Erb2 interacting protein                                                                          | Mm.45357.2                      | 8.5                                    | 7.9                                    | <b>-1.57</b>               | 0.02             |
| 1428267_at    | Dhx40         | DEAH (Asp-Glu-Ala-His) box polypeptide 40                                                         | Mm.2830.1                       | 8.6                                    | 7.9                                    | <b>-1.57</b>               | 0.00             |
| 1429910_at    | March5        | membrane-associated ring finger (C3HC4) 5                                                         | Mm.33211.1                      | 6.1                                    | 5.4                                    | <b>-1.57</b>               | 0.01             |
| 1430519_a_at  | Cnot7         | CCR4-NOT transcription complex, subunit 7                                                         | Mm.206770.3                     | 8.6                                    | 8.0                                    | <b>-1.57</b>               | 0.01             |
| 1434038_at    | Dnajc13       | DnaJ (Hsp40) homolog, subfamily C, member 13                                                      | Mm.26242.1                      | 8.6                                    | 8.0                                    | <b>-1.57</b>               | 0.00             |
| 1434072_at    | Smcr7         | mitochondrial elongation factor 2                                                                 | Mm.61562.1                      | 8.6                                    | 7.9                                    | <b>-1.57</b>               | 0.01             |
| 1435198_at    | Gm5817        | predicted gene 5817                                                                               | Mm.24614.1                      | 6.8                                    | 6.1                                    | <b>-1.57</b>               | 0.05             |
| 1435805_at    | Lin7a         | lin-7 homolog A (C. elegans)                                                                      | Mm.38592.1                      | 9.0                                    | 8.4                                    | <b>-1.57</b>               | 0.00             |
| 1436244_a_at  | Tle2          | transducin-like enhancer of split 2, homolog of Drosophila E(spl)                                 | Mm.38608.2                      | 6.9                                    | 6.2                                    | <b>-1.57</b>               | 0.00             |
| 1436532_at    | Dclk3         | doublecortin-like kinase 3                                                                        | Mm.26361.1                      | 7.7                                    | 7.0                                    | <b>-1.57</b>               | 0.04             |
| 1436740_at    | 2610005L07Rik | cadherin 11 pseudogene                                                                            | Mm.27819.1                      | 8.2                                    | 7.5                                    | <b>-1.57</b>               | 0.00             |
| 1439103_at    | Cdc73         | cell division cycle 73, Paf1/RNA polymerase II complex component                                  | Mm.221175.1                     | 3.7                                    | 3.1                                    | <b>-1.57</b>               | 0.00             |
| 1439319_at    | Elf1          | E74-like factor 1                                                                                 | Mm.131142.1                     | 6.0                                    | 5.4                                    | <b>-1.57</b>               | 0.02             |
| 1440755_at    |               |                                                                                                   | Mm.215581.1                     | 5.8                                    | 5.1                                    | <b>-1.57</b>               | 0.00             |
| 1440856_at    | Mapk8         | mitogen-activated protein kinase 8                                                                | Mm.39724.1                      | 7.6                                    | 7.0                                    | <b>-1.57</b>               | 0.00             |
| 1446511_at    | Msh3          | mutS homolog 3 (E. coli)                                                                          | Mm.215509.1                     | 5.4                                    | 4.8                                    | <b>-1.57</b>               | 0.01             |
| 1447459_at    |               |                                                                                                   | Mm.215669.1                     | 3.7                                    | 3.1                                    | <b>-1.57</b>               | 0.02             |
| 1448825_at    | Pdk2          | pyruvate dehydrogenase kinase, isoenzyme 2                                                        | Mm.29768.1                      | 9.6                                    | 9.0                                    | <b>-1.57</b>               | 0.00             |
| 1451459_at    | Ahctf1        | AT hook containing transcription factor 1                                                         | Mm.128165.1                     | 9.0                                    | 8.3                                    | <b>-1.57</b>               | 0.00             |
| 1455079_at    | Dcun1d4       | DCN1, defective in cullin neddylation 1, domain containing 4 (S. cerevisiae)                      | Mm.220312.1                     | 8.1                                    | 7.5                                    | <b>-1.57</b>               | 0.01             |

**Supplemental Table 9. Significant differently expressed genes in 3bKI HCC samples**

| Affymetrix ID | Gene Symbol | Description                                                                             | Transcript ID<br>(Array Design) | 3aKO<br>avg<br>signal<br>log2<br>(n=4) | 3bKI<br>Avg<br>Signal<br>log2<br>(n=5) | Fold<br>Change<br>(linear) | ANOVA<br>p-value |
|---------------|-------------|-----------------------------------------------------------------------------------------|---------------------------------|----------------------------------------|----------------------------------------|----------------------------|------------------|
| 1455584_at    | Sdf4        | stromal cell derived factor 4                                                           | Mm.39710.1                      | 8.2                                    | 7.5                                    | <b>-1.57</b>               | 0.00             |
| 1455647_at    | Ar          | androgen receptor                                                                       | Mm.39005.1                      | 8.2                                    | 7.5                                    | <b>-1.57</b>               | 0.01             |
| 1456607_at    | Vcpip1      | valosin containing protein (p97)/p47 complex interacting protein 1                      | Mm.89906.3                      | 7.2                                    | 6.5                                    | <b>-1.57</b>               | 0.02             |
| 1457218_at    | Strbp       | spermatid perinuclear RNA binding protein                                               | Mm.192898.1                     | 8.2                                    | 7.6                                    | <b>-1.57</b>               | 0.02             |
| 1459994_x_at  | Tfr2        | transferrin receptor 2                                                                  | Mm.21757.3                      | 11.9                                   | 11.2                                   | <b>-1.57</b>               | 0.01             |
| 1416660_at    | Eif3a       | eukaryotic translation initiation factor 3, subunit A                                   | Mm.2238.1                       | 9.0                                    | 8.3                                    | <b>-1.58</b>               | 0.00             |
| 1417066_at    | Adck3       | aarF domain containing kinase 3                                                         | Mm.28337.1                      | 11.3                                   | 10.6                                   | <b>-1.58</b>               | 0.00             |
| 1418444_a_at  | Gde1        | glycerophosphodiester phosphodiesterase 1                                               | Mm.30126.1                      | 9.6                                    | 8.9                                    | <b>-1.58</b>               | 0.01             |
| 1418594_a_at  | Ncoa1       | nuclear receptor coactivator 1                                                          | Mm.2028.1                       | 7.5                                    | 6.9                                    | <b>-1.58</b>               | 0.02             |
| 1418667_at    | Trappc13    | trafficking protein particle complex 13                                                 | Mm.12755.1                      | 8.5                                    | 7.8                                    | <b>-1.58</b>               | 0.01             |
| 1419101_at    | Sin3a       | transcriptional regulator, SIN3A (yeast)                                                | Mm.15755.1                      | 7.4                                    | 6.7                                    | <b>-1.58</b>               | 0.00             |
| 1421018_at    | Aaed1       | AhpC/TSA antioxidant enzyme domain containing 1                                         | Mm.35724.1                      | 8.3                                    | 7.7                                    | <b>-1.58</b>               | 0.00             |
| 1421055_at    | Lats2       | large tumor suppressor 2; exportin 4                                                    | Mm.143753.1                     | 7.4                                    | 6.7                                    | <b>-1.58</b>               | 0.00             |
| 1421220_at    | Ankrd17     | ankyrin repeat domain 17                                                                | Mm.24624.1                      | 6.8                                    | 6.1                                    | <b>-1.58</b>               | 0.00             |
| 1422560_at    | Ddi2        | DNA-damage inducible protein 2; regulatory solute carrier protein, family 1, member 1   | Mm.17880.1                      | 10.2                                   | 9.5                                    | <b>-1.58</b>               | 0.01             |
| 1423109_s_at  | Slc25a20    | solute carrier family 25 (mitochondrial carnitine/acylcarnitine translocase), member 20 | Mm.29666.1                      | 10.3                                   | 9.6                                    | <b>-1.58</b>               | 0.05             |
| 1425114_at    | Rbbp6       | retinoblastoma binding protein 6                                                        | Mm.127823.1                     | 6.9                                    | 6.3                                    | <b>-1.58</b>               | 0.01             |
| 1425956_a_at  | Cdadc1      | cytidine and dCMP deaminase domain containing 1                                         | Mm.2046.2                       | 9.4                                    | 8.8                                    | <b>-1.58</b>               | 0.00             |
| 1426463_at    | Gphn        | gephyrin                                                                                | Mm.40282.1                      | 9.7                                    | 9.0                                    | <b>-1.58</b>               | 0.01             |
| 1428654_at    | Swt1        | SWT1 RNA endoribonuclease homolog (S. cerevisiae)                                       | Mm.26639.1                      | 7.4                                    | 6.8                                    | <b>-1.58</b>               | 0.01             |
| 1429427_s_at  | Tcf7l2      | transcription factor 7 like 2, T cell specific, HMG box                                 | Mm.4269.4                       | 5.5                                    | 4.8                                    | <b>-1.58</b>               | 0.02             |
| 1429616_at    | Zfp91       | zinc finger protein 91                                                                  | Mm.28324.1                      | 4.7                                    | 4.0                                    | <b>-1.58</b>               | 0.00             |
| 1429649_at    | Slc35a3     | solute carrier family 35 (UDP-N-acetylglucosamine (UDP-GlcNAc) transporter), member 3   | Mm.29250.1                      | 8.3                                    | 7.6                                    | <b>-1.58</b>               | 0.01             |
| 1431947_at    | Ldlr        | low density lipoprotein receptor                                                        | Mm.3213.2                       | 7.7                                    | 7.0                                    | <b>-1.58</b>               | 0.01             |
| 1433585_at    | Tnpo1       | transportin 1                                                                           | Mm.29005.1                      | 9.1                                    | 8.4                                    | <b>-1.58</b>               | 0.02             |
| 1434389_at    | Sos1        | son of sevenless homolog 1 (Drosophila)                                                 | Mm.28960.1                      | 8.8                                    | 8.1                                    | <b>-1.58</b>               | 0.00             |
| 1434401_at    | Zcchc2      | zinc finger, CCHC domain containing 2                                                   | Mm.40627.1                      | 8.7                                    | 8.1                                    | <b>-1.58</b>               | 0.00             |

**Supplemental Table 9. Significant differently expressed genes in 3bKI HCC samples**

| Affymetrix ID | Gene Symbol | Description                                                                                                                    | Transcript ID<br>(Array Design) | 3aKO<br>avg<br>signal<br>log2<br>(n=4) | 3bKI<br>Avg<br>Signal<br>log2<br>(n=5) | Fold<br>Change<br>(linear) | ANOVA<br>p-value |
|---------------|-------------|--------------------------------------------------------------------------------------------------------------------------------|---------------------------------|----------------------------------------|----------------------------------------|----------------------------|------------------|
| 1434485_a_at  | Ugp2        | UDP-glucose pyrophosphorylase 2                                                                                                | Mm.28877.4                      | 11.4                                   | 10.7                                   | <b>-1.58</b>               | 0.00             |
| 1434712_at    | Smcr7l      | mitochondrial elongation factor 1                                                                                              | Mm.34816.1                      | 8.2                                    | 7.5                                    | <b>-1.58</b>               | 0.00             |
| 1438221_at    | Fam126b     | family with sequence similarity 126,<br>member B                                                                               | Mm.41046.1                      | 8.7                                    | 8.1                                    | <b>-1.58</b>               | 0.00             |
| 1439175_at    |             |                                                                                                                                | Mm.184021.1                     | 6.7                                    | 6.1                                    | <b>-1.58</b>               | 0.01             |
| 1439381_x_at  | Marveld1    | MARVEL (membrane-associating)<br>domain containing 1                                                                           | Mm.206250.3                     | 10.0                                   | 9.3                                    | <b>-1.58</b>               | 0.01             |
| 1444178_at    | Gm9895      | predicted gene 9895                                                                                                            | Mm.103412.1                     | 6.7                                    | 6.0                                    | <b>-1.58</b>               | 0.00             |
| 1448410_at    | Ube4b       | ubiquitination factor E4B                                                                                                      | Mm.21634.1                      | 8.8                                    | 8.2                                    | <b>-1.58</b>               | 0.00             |
| 1450983_at    | Akap8       | A kinase (PRKA) anchor protein 8                                                                                               | Mm.27351.1                      | 8.9                                    | 8.2                                    | <b>-1.58</b>               | 0.01             |
| 1452500_at    |             |                                                                                                                                | Mm.139078.2                     | 5.7                                    | 5.0                                    | <b>-1.58</b>               | 0.03             |
| 1454987_a_at  | H2-Ke6      | H2-K region expressed gene 6                                                                                                   | Mm.15479.2                      | 9.6                                    | 8.9                                    | <b>-1.58</b>               | 0.00             |
| 1455151_at    | Akap9       | A kinase (PRKA) anchor protein<br>(yotiao) 9                                                                                   | Mm.46044.1                      | 5.9                                    | 5.2                                    | <b>-1.58</b>               | 0.00             |
| 1455521_at    | Klf12       |                                                                                                                                | Mm.25852.1                      | 7.8                                    | 7.1                                    | <b>-1.58</b>               | 0.00             |
| 1457936_at    | Mapk8       | mitogen-activated protein kinase 8                                                                                             | Mm.210096.1                     | 6.0                                    | 5.3                                    | <b>-1.58</b>               | 0.01             |
| 1459879_at    | Marf1       | meiosis arrest female 1                                                                                                        | Mm.24004.2                      | 7.4                                    | 6.7                                    | <b>-1.58</b>               | 0.00             |
| 1416610_a_at  | Clcn3       | chloride channel 3                                                                                                             | Mm.28842.1                      | 8.5                                    | 7.9                                    | <b>-1.59</b>               | 0.00             |
| 1416679_at    | Abcd3       | ATP-binding cassette, sub-family D<br>(ALD), member 3                                                                          | Mm.1519.1                       | 12.7                                   | 12.0                                   | <b>-1.59</b>               | 0.02             |
| 1416772_at    | Cpt2        | carnitine palmitoyltransferase 2                                                                                               | Mm.29499.1                      | 11.6                                   | 10.9                                   | <b>-1.59</b>               | 0.04             |
| 1417212_at    | Fam195a     | family with sequence similarity 195,<br>member A                                                                               | Mm.34532.1                      | 10.0                                   | 9.4                                    | <b>-1.59</b>               | 0.01             |
| 1417431_a_at  | Sphk2       | sphingosine kinase 2                                                                                                           | Mm.24222.1                      | 8.7                                    | 8.0                                    | <b>-1.59</b>               | 0.04             |
| 1419047_at    | Pcnx        | pecanex homolog (Drosophila)                                                                                                   | Mm.86584.1                      | 7.3                                    | 6.7                                    | <b>-1.59</b>               | 0.00             |
| 1419369_at    | Rnf138      | ring finger protein 138                                                                                                        | Mm.42154.1                      | 6.7                                    | 6.0                                    | <b>-1.59</b>               | 0.00             |
| 1420948_s_at  | Atrx        | alpha thalassemia/mental retardation<br>syndrome X-linked homolog (human)                                                      | Mm.10141.1                      | 6.5                                    | 5.8                                    | <b>-1.59</b>               | 0.00             |
| 1422982_at    | Ar          | androgen receptor                                                                                                              | Mm.4470.1                       | 8.3                                    | 7.6                                    | <b>-1.59</b>               | 0.01             |
| 1423565_at    | Paics       | phosphoribosylaminoimidazole<br>carboxylase,<br>phosphoribosylaminoribosylaminoimi<br>dazole, succinocarboxamide<br>synthetase | Mm.182931.1                     | 12.0                                   | 11.4                                   | <b>-1.59</b>               | 0.00             |
| 1424544_at    | Nrbp2       | nuclear receptor binding protein 2                                                                                             | Mm.157125.1                     | 8.7                                    | 8.1                                    | <b>-1.59</b>               | 0.00             |
| 1424712_at    | Ahctf1      | AT hook containing transcription<br>factor 1                                                                                   | Mm.128165.1                     | 8.5                                    | 7.9                                    | <b>-1.59</b>               | 0.00             |
| 1424898_at    | Slc10a1     | solute carrier family 10 (sodium/bile<br>acid cotransporter family), member 1                                                  | Mm.104295.2                     | 13.0                                   | 12.3                                   | <b>-1.59</b>               | 0.01             |
| 1426461_at    | Ugp2        | UDP-glucose pyrophosphorylase 2                                                                                                | Mm.28877.2                      | 10.3                                   | 9.6                                    | <b>-1.59</b>               | 0.00             |
| 1428385_at    | March8      | membrane-associated ring finger<br>(C3HC4) 8                                                                                   | Mm.27064.1                      | 8.6                                    | 7.9                                    | <b>-1.59</b>               | 0.02             |
| 1429623_at    | Zfp644      | zinc finger protein 644                                                                                                        | Mm.220900.1                     | 7.7                                    | 7.0                                    | <b>-1.59</b>               | 0.00             |
| 1429810_at    | Rictor      | RPTOR independent companion of<br>MTOR, complex 2                                                                              | Mm.40332.1                      | 6.5                                    | 5.8                                    | <b>-1.59</b>               | 0.00             |



## Supplemental Table 9. Significant differently expressed genes in 3bKI HCC samples

| Affymetrix ID | Gene Symbol   | Description                                                                                                                         | Transcript ID<br>(Array Design) | 3aKO<br>avg<br>signal<br>log2<br>(n=4) | 3bKI<br>Avg<br>Signal<br>log2<br>(n=5) | Fold<br>Change<br>(linear) | ANOVA<br>p-value |
|---------------|---------------|-------------------------------------------------------------------------------------------------------------------------------------|---------------------------------|----------------------------------------|----------------------------------------|----------------------------|------------------|
| 1435800_a_at  | Ybx3          | Y box protein 3                                                                                                                     | Mm.193526.3                     | 9.3                                    | 8.6                                    | -1.59                      | 0.00             |
| 1436256_at    | Grpel2        | GrpE-like 2, mitochondrial                                                                                                          | Mm.25786.1                      | 7.7                                    | 7.0                                    | -1.59                      | 0.00             |
| 1436550_at    | Fbxo30        | F-box protein 30                                                                                                                    | Mm.44605.1                      | 6.5                                    | 5.8                                    | -1.59                      | 0.00             |
| 1436968_x_at  | Klhl24        | kelch-like 24                                                                                                                       | Mm.201175.1                     | 3.4                                    | 2.8                                    | -1.59                      | 0.00             |
| 1437041_at    | Sfrs18        | PNN interacting serine/arginine-rich                                                                                                | Mm.100117.3                     | 7.5                                    | 6.8                                    | -1.59                      | 0.00             |
| 1439117_at    | Clmn          | calmin                                                                                                                              | Mm.82595.1                      | 8.4                                    | 7.7                                    | -1.59                      | 0.00             |
| 1441285_at    | Pdp2          |                                                                                                                                     | Mm.151162.1                     | 8.0                                    | 7.3                                    | -1.59                      | 0.00             |
| 1441963_at    | Lzts3         | leucine zipper, putative tumor<br>suppressor family member 3                                                                        | Mm.40621.1                      | 8.7                                    | 8.1                                    | -1.59                      | 0.00             |
| 1442007_at    | Zmym5         | zinc finger, MYM-type 5                                                                                                             | Mm.100820.1                     | 6.8                                    | 6.1                                    | -1.59                      | 0.00             |
| 1442191_at    | 5033411D12Rik | succinyl-CoA glutarate-CoA<br>transferase                                                                                           | Mm.100005.1                     | 6.3                                    | 5.6                                    | -1.59                      | 0.01             |
| 1442959_at    | Birc6         | baculoviral IAP repeat-containing 6                                                                                                 | Mm.218035.1                     | 4.5                                    | 3.9                                    | -1.59                      | 0.01             |
| 1443962_at    | Tfdp2         | transcription factor Dp 2                                                                                                           | Mm.55109.1                      | 7.3                                    | 6.6                                    | -1.59                      | 0.01             |
| 1444612_at    | Ppp2r3a       | protein phosphatase 2, regulatory<br>subunit B", alpha                                                                              | Mm.169667.1                     | 4.5                                    | 3.9                                    | -1.59                      | 0.00             |
| 1448044_a_at  | Gm10658       | predicted gene 10658                                                                                                                | Mm.35221.2                      | 6.7                                    | 6.1                                    | -1.59                      | 0.04             |
| 1451499_at    | Cadps2        | Ca <sup>2+</sup> -dependent activator protein for<br>secretion 2                                                                    | Mm.41732.1                      | 8.2                                    | 7.5                                    | -1.59                      | 0.01             |
| 1452962_at    | Tmem25        | transmembrane protein 25                                                                                                            | Mm.41409.1                      | 8.3                                    | 7.6                                    | -1.59                      | 0.01             |
| 1460279_a_at  | Gtf2i         | general transcription factor II I                                                                                                   | Mm.22593.1                      | 9.0                                    | 8.3                                    | -1.59                      | 0.00             |
| 1460631_at    | Ogt           | O-linked N-acetylglucosamine<br>(GlcNAc) transferase (UDP-N-<br>acetylglucosamine:polypeptide-N-<br>acetylglucosaminyl transferase) | Mm.206715.2                     | 9.8                                    | 9.2                                    | -1.59                      | 0.00             |
| 1417125_at    | Ahcy          | S-adenosylhomocysteine hydrolase                                                                                                    | Mm.2573.1                       | 13.9                                   | 13.2                                   | -1.6                       | 0.00             |
| 1417854_at    | Map2k5        | mitogen-activated protein kinase<br>kinase 5                                                                                        | Mm.19947.1                      | 8.5                                    | 7.9                                    | -1.6                       | 0.00             |
| 1419913_at    | Strap         | serine/threonine kinase receptor<br>associated protein                                                                              | Mm.199211.1                     | 6.2                                    | 5.5                                    | -1.6                       | 0.00             |
| 1421479_at    | Zfp318        | zinc finger protein 318                                                                                                             | Mm.116965.1                     | 6.5                                    | 5.8                                    | -1.6                       | 0.01             |
| 1422975_at    | Mme           | membrane metallo endopeptidase                                                                                                      | Mm.38931.1                      | 7.4                                    | 6.7                                    | -1.6                       | 0.03             |
| 1424412_at    | Ogfr1         | opioid growth factor receptor-like 1                                                                                                | Mm.28013.1                      | 8.3                                    | 7.6                                    | -1.6                       | 0.04             |
| 1424427_at    | Tada1         | transcriptional adaptor 1                                                                                                           | Mm.24671.1                      | 8.0                                    | 7.3                                    | -1.6                       | 0.00             |
| 1427630_x_at  | Ceacam1       | carcinoembryonic antigen-related<br>cell adhesion molecule 1                                                                        | Mm.14114.5                      | 10.7                                   | 10.0                                   | -1.6                       | 0.00             |
| 1428021_at    | Mccc2         | methylcrotonoyl-Coenzyme A<br>carboxylase 2 (beta)                                                                                  | Mm.221067.1                     | 8.2                                    | 7.5                                    | -1.6                       | 0.00             |
| 1429468_at    | 1110018F16Rik | RIKEN cDNA 1110018F16 gene;<br>DnaJ (Hsp40) homolog, subfamily B,<br>member 14                                                      | Mm.40490.1                      | 6.9                                    | 6.3                                    | -1.6                       | 0.00             |
| 1432120_at    | Rmdn2         | regulator of microtubule dynamics 2                                                                                                 | Mm.158495.1                     | 6.3                                    | 5.6                                    | -1.6                       | 0.02             |
| 1432472_a_at  | Mccc2         | methylcrotonoyl-Coenzyme A<br>carboxylase 2 (beta)                                                                                  | Mm.137327.1                     | 9.1                                    | 8.4                                    | -1.6                       | 0.00             |
| 1433647_s_at  | Rhobtb3       | Rho-related BTB domain containing<br>3                                                                                              | Mm.46219.1                      | 8.0                                    | 7.3                                    | -1.6                       | 0.00             |
| 1435000_at    | Gspt1         | G1 to S phase transition 1                                                                                                          | Mm.29255.1                      | 8.9                                    | 8.2                                    | -1.6                       | 0.01             |

**Supplemental Table 9. Significant differently expressed genes in 3bKI HCC samples**

| Affymetrix ID | Gene Symbol   | Description                                                            | Transcript ID<br>(Array Design) | 3aKO<br>avg<br>signal<br>log2<br>(n=4) | 3bKI<br>Avg<br>Signal<br>log2<br>(n=5) | Fold<br>Change<br>(linear) | ANOVA<br>p-value |
|---------------|---------------|------------------------------------------------------------------------|---------------------------------|----------------------------------------|----------------------------------------|----------------------------|------------------|
| 1436766_at    | LOC100861853  | LUC7-like 2 ( <i>S. cerevisiae</i> )                                   | Mm.24304.2                      | 8.9                                    | 8.2                                    | -1.6                       | 0.00             |
| 1439283_at    | Osbp19        | oxysterol binding protein-like 9                                       | Mm.5706.1                       | 6.5                                    | 5.8                                    | -1.6                       | 0.01             |
| 1439443_x_at  | Tkt           | transketolase                                                          | Mm.154387.6                     | 11.7                                   | 11.0                                   | -1.6                       | 0.02             |
| 1440225_at    | Gpr116        | G protein-coupled receptor 116                                         | Mm.23478.1                      | 6.3                                    | 5.6                                    | -1.6                       | 0.01             |
| 1443901_at    | C2cd2         | C2 calcium-dependent domain<br>containing 2                            | Mm.153973.1                     | 8.1                                    | 7.4                                    | -1.6                       | 0.00             |
| 1446433_at    | Acbd5         | acyl-Coenzyme A binding domain<br>containing 5                         | Mm.215977.1                     | 7.6                                    | 6.9                                    | -1.6                       | 0.02             |
| 1449534_at    | Sycp3         | synaptonemal complex protein 3                                         | Mm.148209.1                     | 3.4                                    | 2.7                                    | -1.6                       | 0.02             |
| 1452252_at    | Utp20         | UTP20, small subunit (SSU)<br>processome component, homolog<br>(yeast) | Mm.29631.1                      | 8.3                                    | 7.6                                    | -1.6                       | 0.01             |
| 1452292_at    | Ap2b1         | adaptor-related protein complex 2,<br>beta 1 subunit                   | Mm.39053.1                      | 9.4                                    | 8.7                                    | -1.6                       | 0.00             |
| 1452619_a_at  | Agbl3         | ATP/GTP binding protein-like 3                                         | Mm.154155.1                     | 5.6                                    | 4.9                                    | -1.6                       | 0.00             |
| 1455605_at    | Rufy3         | RUN and FYVE domain containing 3                                       | Mm.37819.3                      | 8.5                                    | 7.8                                    | -1.6                       | 0.00             |
| 1455826_a_at  | Bace1         | beta-site APP cleaving enzyme 1                                        | Mm.24044.2                      | 7.1                                    | 6.4                                    | -1.6                       | 0.00             |
| 1456754_at    | Zfyve20       | zinc finger, FYVE domain containing<br>20                              | Mm.218383.1                     | 6.8                                    | 6.1                                    | -1.6                       | 0.00             |
| 1458305_at    | Tmtc3         | transmembrane and tetratricopeptide<br>repeat containing 3             | Mm.213462.1                     | 3.7                                    | 3.0                                    | -1.6                       | 0.03             |
| 1418472_at    | Aspa          | aspartoacylase                                                         | Mm.20317.1                      | 8.6                                    | 7.9                                    | -1.61                      | 0.02             |
| 1418491_a_at  | Pus3          | pseudouridine synthase 3                                               | Mm.89425.1                      | 5.7                                    | 5.0                                    | -1.61                      | 0.00             |
| 1418495_at    | Zc3h8         | zinc finger CCCH type containing 8                                     | Mm.11675.1                      | 6.9                                    | 6.2                                    | -1.61                      | 0.02             |
| 1419191_at    | Hipk3         | homeodomain interacting protein<br>kinase 3                            | Mm.20333.1                      | 7.2                                    | 6.5                                    | -1.61                      | 0.00             |
| 1419866_s_at  | Atxn2         | ataxin 2                                                               | Mm.199057.1                     | 9.1                                    | 8.4                                    | -1.61                      | 0.01             |
| 1424121_at    | Commd1        | COMM domain containing 1                                               | Mm.29542.1                      | 7.6                                    | 6.9                                    | -1.61                      | 0.01             |
| 1425401_at    | Cpsf4l        | cleavage and polyadenylation<br>specific factor 4-like                 | Mm.190626.1                     | 5.4                                    | 4.7                                    | -1.61                      | 0.00             |
| 1430942_at    | 8430437O03Rik | RIKEN cDNA 8430437O03 gene                                             | Mm.158722.1                     | 6.6                                    | 5.9                                    | -1.61                      | 0.00             |
| 1431328_at    | Ppp1cb        | protein phosphatase 1, catalytic<br>subunit, beta isoform              | Mm.4572.2                       | 6.3                                    | 5.6                                    | -1.61                      | 0.00             |
| 1433734_at    | Slc13a4       | solute carrier family 13<br>(sodium/sulfate symporters),<br>member 4   | Mm.23666.1                      | 6.1                                    | 5.4                                    | -1.61                      | 0.02             |
| 1434243_s_at  | Tomm70a       | translocase of outer mitochondrial<br>membrane 70 homolog A (yeast)    | Mm.21473.2                      | 7.4                                    | 6.7                                    | -1.61                      | 0.00             |
| 1435537_at    | Ptprd         | protein tyrosine phosphatase,<br>receptor type, D                      | Mm.41736.2                      | 9.2                                    | 8.6                                    | -1.61                      | 0.02             |
| 1436332_at    | Hspb6         | heat shock protein, alpha-crystallin-<br>related, B6                   | Mm.34885.1                      | 8.0                                    | 7.3                                    | -1.61                      | 0.03             |
| 1436618_at    | Sfxn5         | sideroflexin 5                                                         | Mm.41018.1                      | 7.9                                    | 7.2                                    | -1.61                      | 0.00             |
| 1438721_a_at  | Irf3          | interferon regulatory factor 3                                         | Mm.3960.4                       | 5.8                                    | 5.2                                    | -1.61                      | 0.01             |
| 1441947_x_at  | Sik3          | SIK family kinase 3                                                    | Mm.125629.1                     | 7.9                                    | 7.2                                    | -1.61                      | 0.00             |
| 1442892_at    |               |                                                                        | Mm.139122.1                     | 5.8                                    | 5.1                                    | -1.61                      | 0.04             |

**Supplemental Table 9. Significant differently expressed genes in 3bKI HCC samples**

| Affymetrix ID | Gene Symbol   | Description                                                                                    | Transcript ID<br>(Array Design) | 3aKO<br>avg<br>signal<br>log2<br>(n=4) | 3bKI<br>Avg<br>Signal<br>log2<br>(n=5) | Fold<br>Change<br>(linear) | ANOVA<br>p-value |
|---------------|---------------|------------------------------------------------------------------------------------------------|---------------------------------|----------------------------------------|----------------------------------------|----------------------------|------------------|
| 1448155_at    | Pdcd6ip       | programmed cell death 6 interacting protein                                                    | Mm.29816.1                      | 9.3                                    | 8.7                                    | -1.61                      | 0.00             |
| 1450376_at    | Mxi1          | Max interacting protein 1                                                                      | Mm.2154.1                       | 8.7                                    | 8.0                                    | -1.61                      | 0.01             |
| 1453287_at    | Ankrd33b      | ankyrin repeat domain 33B                                                                      | Mm.27619.1                      | 7.8                                    | 7.1                                    | -1.61                      | 0.01             |
| 1455222_a_at  | Ubp1          | upstream binding protein 1                                                                     | Mm.28052.3                      | 9.7                                    | 9.0                                    | -1.61                      | 0.00             |
| 1455329_at    |               | cell division cycle 37-like 1                                                                  | Mm.31013.1                      | 6.2                                    | 5.5                                    | -1.61                      | 0.00             |
| 1457110_at    | Pank1         | pantothenate kinase 1                                                                          | Mm.129337.1                     | 6.9                                    | 6.2                                    | -1.61                      | 0.02             |
| 1459030_at    | Bbox1         | butyrobetaine (gamma), 2-oxoglutarate dioxygenase 1 (gamma-butyrobetaine hydroxylase)          | Mm.40249.1                      | 9.3                                    | 8.6                                    | -1.61                      | 0.02             |
| 1417531_at    | Cyp2j5        | cytochrome P450, family 2, subfamily j, polypeptide 5                                          | Mm.12838.1                      | 12.6                                   | 11.9                                   | -1.62                      | 0.00             |
| 1417850_at    | Rb1           | retinoblastoma 1                                                                               | Mm.304.1                        | 6.4                                    | 5.8                                    | -1.62                      | 0.02             |
| 1418474_at    | Emc9          | ER membrane protein complex subunit 9                                                          | Mm.40667.1                      | 10.0                                   | 9.3                                    | -1.62                      | 0.00             |
| 1422857_at    | Trip4         | thyroid hormone receptor interactor 4                                                          | Mm.27462.1                      | 8.2                                    | 7.5                                    | -1.62                      | 0.02             |
| 1424035_at    | Rora          | RAR-related orphan receptor alpha                                                              | Mm.8858.2                       | 6.5                                    | 5.8                                    | -1.62                      | 0.01             |
| 1426850_a_at  | Map2k6        | mitogen-activated protein kinase kinase 6                                                      | Mm.14487.2                      | 7.8                                    | 7.1                                    | -1.62                      | 0.02             |
| 1428085_at    | 1110057K04Rik | RIKEN cDNA 1110057K04 gene                                                                     | Mm.25608.1                      | 9.2                                    | 8.5                                    | -1.62                      | 0.00             |
| 1428280_at    | Fip111        | FIP1 like 1 (S. cerevisiae)                                                                    | Mm.24084.2                      | 8.2                                    | 7.5                                    | -1.62                      | 0.00             |
| 1429988_at    | Zfp235        | zinc finger protein 235                                                                        | Mm.70963.1                      | 5.6                                    | 4.9                                    | -1.62                      | 0.02             |
| 1431189_a_at  | Fahd2a        | fumarylacetoacetate hydrolase domain containing 2A                                             | Mm.180782.2                     | 7.4                                    | 6.7                                    | -1.62                      | 0.01             |
| 1435274_at    | Spopl         | speckle-type POZ protein-like                                                                  | Mm.49884.1                      | 6.2                                    | 5.5                                    | -1.62                      | 0.04             |
| 1435591_at    | AI426330      | expressed sequence AI426330                                                                    | Mm.33776.1                      | 5.9                                    | 5.2                                    | -1.62                      | 0.00             |
| 1435626_a_at  | Herpud1       | homocysteine-inducible, endoplasmic reticulum stress-inducible, ubiquitin-like domain member 1 | Mm.29151.2                      | 12.3                                   | 11.6                                   | -1.62                      | 0.01             |
| 1436189_at    | Nqo2          | NAD(P)H dehydrogenase, quinone 2                                                               | Mm.99453.1                      | 7.7                                    | 7.0                                    | -1.62                      | 0.01             |
| 1436219_at    | Fam210a       | family with sequence similarity 210, member A                                                  | Mm.34672.1                      | 7.4                                    | 6.7                                    | -1.62                      | 0.02             |
| 1437570_at    | AI503301      | expressed sequence AI503301; LUC7-like 3 (S. cerevisiae)                                       | Mm.31113.1                      | 5.6                                    | 4.9                                    | -1.62                      | 0.01             |
| 1438816_at    | Ahctf1        | AT hook containing transcription factor 1                                                      | Mm.126099.1                     | 6.1                                    | 5.4                                    | -1.62                      | 0.01             |
| 1440886_at    | Cdc3711       | cell division cycle 37-like 1                                                                  | Mm.170751.1                     | 7.0                                    | 6.3                                    | -1.62                      | 0.00             |
| 1442916_at    |               |                                                                                                | Mm.125754.1                     | 6.2                                    | 5.5                                    | -1.62                      | 0.01             |
| 1443196_at    |               | ring finger protein 217                                                                        | Mm.209415.1                     | 6.1                                    | 5.4                                    | -1.62                      | 0.01             |
| 1447121_at    |               |                                                                                                | Mm.54150.1                      | 7.7                                    | 7.0                                    | -1.62                      | 0.03             |
| 1448973_at    | Sult1d1       | sulfotransferase family 1D, member 1                                                           | Mm.6824.1                       | 10.9                                   | 10.2                                   | -1.62                      | 0.04             |
| 1449620_s_at  | Adcy9         | adenylate cyclase 9                                                                            | Mm.201803.1                     | 7.7                                    | 7.0                                    | -1.62                      | 0.00             |

**Supplemental Table 9. Significant differently expressed genes in 3bKI HCC samples**

| Affymetrix ID | Gene Symbol   | Description                                                   | Transcript ID<br>(Array Design) | 3aKO<br>avg<br>signal<br>log2<br>(n=4) | 3bKI<br>Avg<br>Signal<br>log2<br>(n=5) | Fold<br>Change<br>(linear) | ANOVA<br>p-value |
|---------------|---------------|---------------------------------------------------------------|---------------------------------|----------------------------------------|----------------------------------------|----------------------------|------------------|
| 1454663_at    | Eif5          | eukaryotic translation initiation factor 5                    | Mm.196515.1                     | 9.9                                    | 9.2                                    | -1.62                      | 0.00             |
| 1456371_a_at  | Shroom1       | shroom family member 1                                        | Mm.202216.3                     | 7.9                                    | 7.2                                    | -1.62                      | 0.00             |
| 1457020_at    |               |                                                               | Mm.131196.1                     | 6.6                                    | 5.9                                    | -1.62                      | 0.01             |
| 1457883_at    | Pm20d2        | peptidase M20 domain containing 2                             | Mm.212481.1                     | 5.5                                    | 4.8                                    | -1.62                      | 0.00             |
| 1424400_a_at  | Aldh1l1       | aldehyde dehydrogenase 1 family, member L1                    | Mm.30035.1                      | 13.5                                   | 12.7                                   | -1.63                      | 0.00             |
| 1424826_s_at  | Mtss1         | metastasis suppressor 1                                       | Mm.220818.1                     | 10.6                                   | 9.9                                    | -1.63                      | 0.01             |
| 1425596_at    | AI317395      | expressed sequence AI317395                                   | Mm.26536.1                      | 8.4                                    | 7.7                                    | -1.63                      | 0.01             |
| 1426325_at    | Kif1c         | kinesin family member 1C                                      | Mm.90223.1                      | 6.2                                    | 5.5                                    | -1.63                      | 0.00             |
| 1428231_at    | Cpsf6         | cleavage and polyadenylation specific factor 6                | Mm.34851.1                      | 9.0                                    | 8.3                                    | -1.63                      | 0.00             |
| 1429264_at    | Fam120aos     | family with sequence similarity 120A, opposite strand         | Mm.33215.1                      | 8.1                                    | 7.4                                    | -1.63                      | 0.00             |
| 1429530_a_at  | Smpd4         | sphingomyelin phosphodiesterase 4                             | Mm.34659.2                      | 4.3                                    | 3.6                                    | -1.63                      | 0.00             |
| 1434036_at    | Mtss1         | metastasis suppressor 1                                       | Mm.196718.3                     | 11.4                                   | 10.7                                   | -1.63                      | 0.02             |
| 1434273_at    | Fam174b       | family with sequence similarity 174, member B                 | Mm.4143.2                       | 8.0                                    | 7.3                                    | -1.63                      | 0.02             |
| 1434529_x_at  | Chfr          | checkpoint with forkhead and ring finger domains              | Mm.30264.2                      | 7.1                                    | 6.4                                    | -1.63                      | 0.00             |
| 1434807_s_at  | Mtx3          | metaxin 3                                                     | Mm.202301.1                     | 7.2                                    | 6.5                                    | -1.63                      | 0.01             |
| 1437481_at    | Trmt61b       | tRNA methyltransferase 61B                                    | Mm.75202.2                      | 6.9                                    | 6.2                                    | -1.63                      | 0.00             |
| 1442141_at    | BC028454      |                                                               | Mm.88727.1                      | 6.9                                    | 6.2                                    | -1.63                      | 0.00             |
| 1445341_at    |               | ragulator complex protein LAMTOR4-like                        | Mm.182701.1                     | 3.9                                    | 3.2                                    | -1.63                      | 0.01             |
| 1446074_at    | Marc1         | mitochondrial amidoxime reducing component 1                  | Mm.212414.1                     | 10.1                                   | 9.4                                    | -1.63                      | 0.02             |
| 1451281_at    | Zscan12       | zinc finger and SCAN domain containing 12                     | Mm.24124.1                      | 5.8                                    | 5.1                                    | -1.63                      | 0.00             |
| 1454375_at    | 5730458M16Rik | RIKEN cDNA 5730458M16 gene                                    | Mm.158121.1                     | 5.2                                    | 4.5                                    | -1.63                      | 0.01             |
| 1454647_at    | Acad11        | acyl-Coenzyme A dehydrogenase family, member 11               | Mm.41274.4                      | 12.5                                   | 11.8                                   | -1.63                      | 0.03             |
| 1417070_at    | Cyp4v3        | cytochrome P450, family 4, subfamily v, polypeptide 3         | Mm.1554.1                       | 10.8                                   | 10.1                                   | -1.64                      | 0.02             |
| 1417208_at    | Amacr         | alpha-methylacyl-CoA racemase                                 | Mm.2787.1                       | 11.0                                   | 10.3                                   | -1.64                      | 0.00             |
| 1419975_at    | Scp2          | sterol carrier protein 2, liver                               | Mm.206843.1                     | 7.1                                    | 6.4                                    | -1.64                      | 0.01             |
| 1422990_at    | Met           | met proto-oncogene                                            | Mm.86844.1                      | 8.3                                    | 7.6                                    | -1.64                      | 0.00             |
| 1423878_at    | Gypc          | glycophorin C                                                 | Mm.38774.1                      | 8.0                                    | 7.3                                    | -1.64                      | 0.05             |
| 1425280_at    | Leng1         | leukocyte receptor cluster (LRC) member 1                     | Mm.175032.1                     | 6.8                                    | 6.0                                    | -1.64                      | 0.01             |
| 1427171_at    | Rlf           | rearranged L-myc fusion sequence                              | Mm.68846.1                      | 7.1                                    | 6.4                                    | -1.64                      | 0.00             |
| 1427425_at    | Slc25a51      | solute carrier family 25, member 51                           | Mm.154573.1                     | 8.8                                    | 8.1                                    | -1.64                      | 0.01             |
| 1428978_at    | 2900009J20Rik |                                                               | Mm.82240.1                      | 6.3                                    | 5.6                                    | -1.64                      | 0.00             |
| 1429784_at    | Mapk1ip1l     | mitogen-activated protein kinase 1 interacting protein 1-like | Mm.111185.1                     | 6.8                                    | 6.1                                    | -1.64                      | 0.01             |
| 1432562_at    | 1110006G14Rik | SRY (sex determining region Y)-box 6, opposite strand         | Mm.158213.1                     | 5.7                                    | 5.0                                    | -1.64                      | 0.00             |

**Supplemental Table 9. Significant differently expressed genes in 3bKI HCC samples**

| Affymetrix ID | Gene Symbol   | Description                                                             | Transcript ID<br>(Array Design) | 3aKO<br>avg<br>signal<br>log2<br>(n=4) | 3bKI<br>Avg<br>Signal<br>log2<br>(n=5) | Fold<br>Change<br>(linear) | ANOVA<br>p-value |
|---------------|---------------|-------------------------------------------------------------------------|---------------------------------|----------------------------------------|----------------------------------------|----------------------------|------------------|
| 1433618_at    | C330006A16Rik | RIKEN cDNA C330006A16 gene                                              | Mm.27954.1                      | 8.7                                    | 7.9                                    | -1.64                      | 0.00             |
| 1434099_at    | Ppargc1a      | peroxisome proliferative activated receptor, gamma, coactivator 1 alpha | Mm.35687.3                      | 4.6                                    | 3.9                                    | -1.64                      | 0.02             |
| 1435391_at    | Rbm33         | RNA binding motif protein 33                                            | Mm.89914.1                      | 8.3                                    | 7.6                                    | -1.64                      | 0.00             |
| 1437668_at    | Ccr11         | atypical chemokine receptor 4                                           | Mm.29762.2                      | 6.3                                    | 5.6                                    | -1.64                      | 0.01             |
| 1437751_at    | Ppargc1a      | peroxisome proliferative activated receptor, gamma, coactivator 1 alpha | Mm.10707.2                      | 6.6                                    | 5.8                                    | -1.64                      | 0.02             |
| 1438178_x_at  | Atad3a        | ATPase family, AAA domain containing 3A                                 | Mm.21881.3                      | 9.5                                    | 8.8                                    | -1.64                      | 0.01             |
| 1439290_at    |               |                                                                         | Mm.218143.1                     | 5.1                                    | 4.4                                    | -1.64                      | 0.01             |
| 1446342_at    | 2310001H17Rik | RIKEN cDNA 2310001H17 gene                                              | Mm.213246.1                     | 6.2                                    | 5.5                                    | -1.64                      | 0.02             |
| 1448181_at    | Klf15         | Kruppel-like factor 15                                                  | Mm.41389.1                      | 11.2                                   | 10.5                                   | -1.64                      | 0.02             |
| 1448418_s_at  | Dcaf11        | DDB1 and CUL4 associated factor 11                                      | Mm.11535.1                      | 12.5                                   | 11.8                                   | -1.64                      | 0.00             |
| 1450068_at    | Baz1b         | bromodomain adjacent to zinc finger domain, 1B                          | Mm.40331.1                      | 6.7                                    | 6.0                                    | -1.64                      | 0.01             |
| 1453140_at    | Zfp871        | zinc finger protein 871                                                 | Mm.38813.1                      | 8.8                                    | 8.1                                    | -1.64                      | 0.01             |
| 1456430_at    | Ttc14         | tetratricopeptide repeat domain 14                                      | Mm.6148.1                       | 6.7                                    | 6.0                                    | -1.64                      | 0.00             |
| 1457756_at    | Zkscan8       | zinc finger with KRAB and SCAN domains 8                                | Mm.151515.1                     | 5.4                                    | 4.7                                    | -1.64                      | 0.00             |
| 1457791_at    | B830008H07Rik | RIKEN cDNA B830008H07 gene                                              | Mm.37292.1                      | 9.6                                    | 8.9                                    | -1.64                      | 0.02             |
| 1458314_at    |               |                                                                         | Mm.101872.1                     | 5.0                                    | 4.3                                    | -1.64                      | 0.01             |
| 1458618_at    |               |                                                                         | Mm.218563.1                     | 5.8                                    | 5.1                                    | -1.64                      | 0.00             |
| 1460132_at    |               |                                                                         | Mm.150378.1                     | 6.7                                    | 5.9                                    | -1.64                      | 0.00             |
| 1460448_s_at  | Ttc14         | tetratricopeptide repeat domain 14                                      | Mm.87673.1                      | 6.2                                    | 5.4                                    | -1.64                      | 0.00             |
| 1415950_a_at  | Pebp1         | phosphatidylethanolamine binding protein 1                              | Mm.195898.1                     | 12.7                                   | 12.0                                   | -1.65                      | 0.02             |
| 1419068_at    | Rabgef1       | RAB guanine nucleotide exchange factor (GEF) 1                          | Mm.101118.1                     | 7.4                                    | 6.7                                    | -1.65                      | 0.00             |
| 1419173_at    | Acy1          | aminoacylase 1                                                          | Mm.7165.1                       | 9.7                                    | 9.0                                    | -1.65                      | 0.00             |
| 1419811_at    | Adcy9         | adenylate cyclase 9                                                     | Mm.201803.1                     | 7.7                                    | 7.0                                    | -1.65                      | 0.00             |
| 1421478_a_at  | Zfp318        | zinc finger protein 318                                                 | Mm.116965.1                     | 7.1                                    | 6.3                                    | -1.65                      | 0.01             |
| 1424952_at    | Ociad1        | OCIA domain containing 1                                                | Mm.24272.2                      | 6.6                                    | 5.9                                    | -1.65                      | 0.00             |
| 1429320_at    | Cdkn2aip      | CDKN2A interacting protein                                              | Mm.53963.1                      | 5.9                                    | 5.2                                    | -1.65                      | 0.00             |
| 1434778_at    | Wapal         | wings apart-like homolog (Drosophila)                                   | Mm.28257.1                      | 8.2                                    | 7.5                                    | -1.65                      | 0.00             |
| 1435397_at    | Zbtb44        | zinc finger and BTB domain containing 44                                | Mm.86401.1                      | 8.4                                    | 7.7                                    | -1.65                      | 0.02             |
| 1437926_at    | Xpnpep3       | X-prolyl aminopeptidase (aminopeptidase P) 3, putative                  | Mm.42492.1                      | 8.5                                    | 7.7                                    | -1.65                      | 0.00             |
| 1438695_at    | C230091D08Rik | RIKEN cDNA C230091D08 gene                                              | Mm.132544.4                     | 7.7                                    | 6.9                                    | -1.65                      | 0.00             |
| 1438842_at    | Mtch2         | mitochondrial carrier homolog 2 (C. elegans)                            | Mm.28023.5                      | 5.7                                    | 4.9                                    | -1.65                      | 0.00             |
| 1447693_s_at  | Neo1          | neogenin                                                                | Mm.132212.1                     | 7.4                                    | 6.7                                    | -1.65                      | 0.00             |
| 1448760_at    | Zfp68         | zinc finger protein 68                                                  | Mm.27575.1                      | 6.4                                    | 5.7                                    | -1.65                      | 0.03             |

**Supplemental Table 9. Significant differently expressed genes in 3bKI HCC samples**

| Affymetrix ID | Gene Symbol   | Description                                                         | Transcript ID<br>(Array Design) | 3aKO<br>avg<br>signal<br>log2<br>(n=4) | 3bKI<br>Avg<br>Signal<br>log2<br>(n=5) | Fold<br>Change<br>(linear) | ANOVA<br>p-value |
|---------------|---------------|---------------------------------------------------------------------|---------------------------------|----------------------------------------|----------------------------------------|----------------------------|------------------|
| 1449186_at    | Bag4          | BCL2-associated athanogene 4                                        | Mm.27102.1                      | 8.6                                    | 7.9                                    | <b>-1.65</b>               | 0.01             |
| 1450097_s_at  | Gna12         | guanine nucleotide binding protein,<br>alpha 12                     | Mm.140610.1                     | 9.2                                    | 8.5                                    | <b>-1.65</b>               | 0.01             |
| 1450715_at    | Cyp1a2        | cytochrome P450, family 1,<br>subfamily a, polypeptide 2            | Mm.15537.1                      | 12.7                                   | 12.0                                   | <b>-1.65</b>               | 0.02             |
| 1451559_a_at  | Dhrs4         | dehydrogenase/reductase (SDR<br>family) member 4                    | Mm.27427.2                      | 11.4                                   | 10.7                                   | <b>-1.65</b>               | 0.04             |
| 1452122_at    | AI314180      | expressed sequence AI314180                                         | Mm.27829.1                      | 8.9                                    | 8.2                                    | <b>-1.65</b>               | 0.00             |
| 1453156_s_at  | Ptgr2         | prostaglandin reductase 2                                           | Mm.195974.2                     | 8.2                                    | 7.5                                    | <b>-1.65</b>               | 0.00             |
| 1455261_at    | Luc7l         | Luc7 homolog (S. cerevisiae)-like                                   | Mm.25619.1                      | 7.6                                    | 6.9                                    | <b>-1.65</b>               | 0.00             |
| 1456791_at    | Zfp800        | zinc finger protein 800                                             | Mm.30860.1                      | 6.5                                    | 5.8                                    | <b>-1.65</b>               | 0.01             |
| 1457027_at    | Dhtkd1        | dehydrogenase E1 and<br>transketolase domain containing 1           | Mm.128121.1                     | 10.3                                   | 9.6                                    | <b>-1.65</b>               | 0.01             |
| 1457227_at    | Gm11266       | predicted gene 11266                                                | Mm.41666.1                      | 5.4                                    | 4.6                                    | <b>-1.65</b>               | 0.02             |
| 1415716_a_at  | Gm9846        | ribosomal protein S27; ribosomal<br>protein S27, retrogene          | Mm.29911.1                      | 11.9                                   | 11.2                                   | <b>-1.66</b>               | 0.00             |
| 1418473_at    | Cutc          | cutC copper transporter homolog<br>(E.coli)                         | Mm.20257.1                      | 8.7                                    | 8.0                                    | <b>-1.66</b>               | 0.00             |
| 1421054_at    | Xpo4          | exportin 4                                                          | Mm.143753.1                     | 6.4                                    | 5.7                                    | <b>-1.66</b>               | 0.00             |
| 1425057_at    | Pbld1         | phenazine biosynthesis-like protein<br>domain containing 1          | Mm.104960.1                     | 11.3                                   | 10.6                                   | <b>-1.66</b>               | 0.02             |
| 1426061_x_at  |               |                                                                     | Mm.212861.1                     | 7.2                                    | 6.4                                    | <b>-1.66</b>               | 0.00             |
| 1427322_at    | Brwd1         | bromodomain and WD repeat<br>domain containing 1                    | Mm.131039.2                     | 7.4                                    | 6.6                                    | <b>-1.66</b>               | 0.00             |
| 1428768_at    | Pan3          | PAN3 polyA specific ribonuclease<br>subunit homolog (S. cerevisiae) | Mm.79960.1                      | 8.1                                    | 7.3                                    | <b>-1.66</b>               | 0.00             |
| 1429966_at    | 3110057O12Rik | RIKEN cDNA 3110057O12 gene                                          | Mm.34725.1                      | 5.3                                    | 4.5                                    | <b>-1.66</b>               | 0.01             |
| 1434978_at    | Fam210a       | family with sequence similarity 210,<br>member A                    | Mm.171701.1                     | 8.6                                    | 7.8                                    | <b>-1.66</b>               | 0.00             |
| 1435483_x_at  | Slc25a32      | solute carrier family 25, member 32                                 | Mm.17875.2                      | 5.2                                    | 4.5                                    | <b>-1.66</b>               | 0.01             |
| 1436543_at    | Gtpbp10       | GTP-binding protein 10 (putative)                                   | Mm.86921.2                      | 7.7                                    | 6.9                                    | <b>-1.66</b>               | 0.00             |
| 1440936_at    | Serac1        | serine active site containing 1                                     | Mm.5548.1                       | 6.4                                    | 5.6                                    | <b>-1.66</b>               | 0.01             |
| 1444531_at    |               |                                                                     | Mm.40499.1                      | 7.0                                    | 6.3                                    | <b>-1.66</b>               | 0.01             |
| 1444599_at    | Herc4         | hect domain and RLD 4                                               | Mm.183744.1                     | 6.0                                    | 5.3                                    | <b>-1.66</b>               | 0.00             |
| 1455407_at    | Zfp236        | zinc finger protein 236                                             | Mm.127095.1                     | 6.6                                    | 5.8                                    | <b>-1.66</b>               | 0.00             |
| 1456019_at    | Cwf19l2       | CWF19-like 2, cell cycle control (S.<br>pombe)                      | Mm.72009.1                      | 7.1                                    | 6.4                                    | <b>-1.66</b>               | 0.00             |
| 1421990_at    | Syt1          | synaptotagmin I                                                     | Mm.5101.1                       | 7.0                                    | 6.3                                    | <b>-1.67</b>               | 0.01             |
| 1423249_at    | Nktr          | natural killer tumor recognition<br>sequence                        | Mm.23964.1                      | 7.8                                    | 7.1                                    | <b>-1.67</b>               | 0.00             |
| 1429778_at    | Optn          | optineurin                                                          | Mm.116942.1                     | 9.2                                    | 8.4                                    | <b>-1.67</b>               | 0.01             |
| 1433527_at    | Ireb2         | iron responsive element binding<br>protein 2                        | Mm.163230.1                     | 9.4                                    | 8.7                                    | <b>-1.67</b>               | 0.00             |
| 1433664_at    | Ube2q2        | ubiquitin-conjugating enzyme E2Q<br>(putative) 2                    | Mm.24729.1                      | 7.3                                    | 6.6                                    | <b>-1.67</b>               | 0.01             |
| 1433694_at    | Pde3b         | phosphodiesterase 3B, cGMP-<br>inhibited                            | Mm.39980.1                      | 10.3                                   | 9.5                                    | <b>-1.67</b>               | 0.01             |

**Supplemental Table 9. Significant differently expressed genes in 3bKI HCC samples**

| Affymetrix ID | Gene Symbol   | Description                                                                               | Transcript ID<br>(Array Design) | 3aKO<br>avg<br>signal<br>log2<br>(n=4) | 3bKI<br>Avg<br>Signal<br>log2<br>(n=5) | Fold<br>Change<br>(linear) | ANOVA<br>p-value |
|---------------|---------------|-------------------------------------------------------------------------------------------|---------------------------------|----------------------------------------|----------------------------------------|----------------------------|------------------|
| 1433782_at    | Cldn12        | claudin 12                                                                                | Mm.40132.1                      | 9.1                                    | 8.4                                    | <b>-1.67</b>               | 0.00             |
| 1434454_at    | Adcy9         | adenylate cyclase 9                                                                       | Mm.43948.1                      | 7.6                                    | 6.8                                    | <b>-1.67</b>               | 0.01             |
| 1437950_at    | Fam149a       | family with sequence similarity 149,<br>member A                                          | Mm.213405.1                     | 6.2                                    | 5.5                                    | <b>-1.67</b>               | 0.03             |
| 1441026_at    | Parp4         | poly (ADP-ribose) polymerase family,<br>member 4                                          | Mm.213013.1                     | 4.9                                    | 4.2                                    | <b>-1.67</b>               | 0.01             |
| 1441141_at    |               |                                                                                           | Mm.100257.1                     | 5.6                                    | 4.8                                    | <b>-1.67</b>               | 0.02             |
| 1443695_at    | Habp2         | hyaluronic acid binding protein 2                                                         | Mm.202667.1                     | 7.3                                    | 6.5                                    | <b>-1.67</b>               | 0.00             |
| 1446504_at    |               |                                                                                           | Mm.207949.1                     | 3.8                                    | 3.1                                    | <b>-1.67</b>               | 0.02             |
| 1448661_at    | Plcb3         | phospholipase C, beta 3                                                                   | Mm.6888.1                       | 7.4                                    | 6.7                                    | <b>-1.67</b>               | 0.00             |
| 1449628_s_at  | Stard7        | START domain containing 7                                                                 | Mm.219882.1                     | 11.4                                   | 10.7                                   | <b>-1.67</b>               | 0.00             |
| 1454840_at    | Mccc2         | methylcrotonoyl-Coenzyme A<br>carboxylase 2 (beta)                                        | Mm.137327.2                     | 10.1                                   | 9.4                                    | <b>-1.67</b>               | 0.00             |
| 1454935_at    | Fitm2         | fat storage-inducing transmembrane<br>protein 2                                           | Mm.28554.1                      | 9.1                                    | 8.4                                    | <b>-1.67</b>               | 0.01             |
| 1454975_at    | Zfc3h1        | zinc finger, C3H1-type containing                                                         | Mm.38383.1                      | 8.6                                    | 7.9                                    | <b>-1.67</b>               | 0.00             |
| 1455740_at    | Hnrnpa1       | heterogeneous nuclear<br>ribonucleoprotein A1                                             | Mm.27927.6                      | 4.8                                    | 4.1                                    | <b>-1.67</b>               | 0.00             |
| 1456506_at    | Prpf38b       | PRP38 pre-mRNA processing factor<br>38 (yeast) domain containing B                        | Mm.139225.1                     | 5.0                                    | 4.2                                    | <b>-1.67</b>               | 0.00             |
| 1460189_at    | Dcaf11        | DDB1 and CUL4 associated factor<br>11                                                     | Mm.11535.1                      | 12.5                                   | 11.8                                   | <b>-1.67</b>               | 0.00             |
| 1460368_at    | Mpp4          | membrane protein, palmitoylated 4<br>(MAGUK p55 subfamily member 4)                       | Mm.101838.1                     | 5.4                                    | 4.7                                    | <b>-1.67</b>               | 0.01             |
| 1418565_at    | Serbp1        | serpine1 mRNA binding protein 1                                                           | Mm.18700.1                      | 6.4                                    | 5.7                                    | <b>-1.68</b>               | 0.00             |
| 1418715_at    | Pank1         | pantothenate kinase 1                                                                     | Mm.24742.1                      | 11.3                                   | 10.6                                   | <b>-1.68</b>               | 0.02             |
| 1419102_at    | Sin3a         | transcriptional regulator, SIN3A<br>(yeast)                                               | Mm.15755.1                      | 7.0                                    | 6.2                                    | <b>-1.68</b>               | 0.00             |
| 1419915_at    | Nus1          | nuclear undecaprenyl pyrophosphate<br>synthase 1 homolog ( <i>S. cerevisiae</i> )         | Mm.199964.1                     | 6.3                                    | 5.5                                    | <b>-1.68</b>               | 0.00             |
| 1428162_at    | Lrif1         | ligand dependent nuclear receptor<br>interacting factor 1                                 | Mm.32150.1                      | 6.0                                    | 5.2                                    | <b>-1.68</b>               | 0.03             |
| 1430991_at    | 1810014B01Rik | RIKEN cDNA 1810014B01 gene                                                                | Mm.46783.2                      | 8.9                                    | 8.1                                    | <b>-1.68</b>               | 0.00             |
| 1432355_at    | 2210039B01Rik | RIKEN cDNA 2210039B01 gene                                                                | Mm.219773.1                     | 6.7                                    | 6.0                                    | <b>-1.68</b>               | 0.01             |
| 1433713_at    | Gcn11l        | GCN1 general control of amino-acid<br>synthesis 1-like 1 (yeast); predicted<br>gene 13123 | Mm.45024.1                      | 7.8                                    | 7.1                                    | <b>-1.68</b>               | 0.00             |
| 1434870_at    | 2810004N23Rik | RIKEN cDNA 2810004N23 gene                                                                | Mm.33233.1                      | 7.6                                    | 6.9                                    | <b>-1.68</b>               | 0.00             |
| 1435925_at    | Git2          | G protein-coupled receptor kinase-<br>interactor 2                                        | Mm.22844.1                      | 7.4                                    | 6.7                                    | <b>-1.68</b>               | 0.00             |
| 1436363_a_at  | Nfix          | nuclear factor I/X                                                                        | Mm.9394.3                       | 10.6                                   | 9.8                                    | <b>-1.68</b>               | 0.00             |
| 1439696_at    | Nr2c2         | nuclear receptor subfamily 2, group<br>C, member 2                                        | Mm.132673.1                     | 4.9                                    | 4.1                                    | <b>-1.68</b>               | 0.00             |
| 1442381_at    |               |                                                                                           | Mm.162073.1                     | 6.2                                    | 5.4                                    | <b>-1.68</b>               | 0.00             |
| 1447527_at    |               |                                                                                           | Mm.99929.1                      | 6.0                                    | 5.3                                    | <b>-1.68</b>               | 0.02             |
| 1448426_at    | Sardh         | sarcosine dehydrogenase                                                                   | Mm.141020.1                     | 11.2                                   | 10.4                                   | <b>-1.68</b>               | 0.01             |

**Supplemental Table 9. Significant differently expressed genes in 3bKI HCC samples**

| Affymetrix ID | Gene Symbol   | Description                                                                                        | Transcript ID<br>(Array Design) | 3aKO<br>avg<br>signal<br>log2<br>(n=4) | 3bKI<br>Avg<br>Signal<br>log2<br>(n=5) | Fold<br>Change<br>(linear) | ANOVA<br>p-value |
|---------------|---------------|----------------------------------------------------------------------------------------------------|---------------------------------|----------------------------------------|----------------------------------------|----------------------------|------------------|
| 1449481_at    | Slc25a13      | solute carrier family 25<br>(mitochondrial carrier, adenine<br>nucleotide translocator), member 13 | Mm.24513.1                      | 12.1                                   | 11.3                                   | <b>-1.68</b>               | 0.01             |
| 1449817_at    | Abcb11        | ATP-binding cassette, sub-family B<br>(MDR/TAP), member 11                                         | Mm.26728.1                      | 12.1                                   | 11.4                                   | <b>-1.68</b>               | 0.00             |
| 1450051_at    | Atrx          | alpha thalassemia/mental retardation<br>syndrome X-linked homolog (human)                          | Mm.10141.1                      | 7.3                                    | 6.5                                    | <b>-1.68</b>               | 0.01             |
| 1454980_at    | Pdpr          | Mus musculus non-coding RNA,<br>oocyte_piRNA216, complete<br>sequence.                             | Mm.28350.1                      | 8.6                                    | 7.9                                    | <b>-1.68</b>               | 0.01             |
| 1455095_at    | Hist2h2be     | histone cluster 2, H2be                                                                            | Mm.5220.1                       | 5.3                                    | 4.6                                    | <b>-1.68</b>               | 0.02             |
| 1457899_at    | Kalrn         | kalirin, RhoGEF kinase                                                                             | Mm.28453.1                      | 6.1                                    | 5.3                                    | <b>-1.68</b>               | 0.00             |
| 1417969_at    | Fbxo31        | F-box protein 31                                                                                   | Mm.24829.1                      | 8.5                                    | 7.8                                    | <b>-1.69</b>               | 0.00             |
| 1418412_at    | Tpd52l1       | tumor protein D52-like 1                                                                           | Mm.7821.1                       | 7.2                                    | 6.4                                    | <b>-1.69</b>               | 0.00             |
| 1427677_a_at  | Sox6          | SRY (sex determining region Y)-box<br>6                                                            | Mm.4656.3                       | 7.2                                    | 6.4                                    | <b>-1.69</b>               | 0.01             |
| 1428894_at    | 1300018J18Rik | selenoprotein O                                                                                    | Mm.44763.1                      | 10.3                                   | 9.5                                    | <b>-1.69</b>               | 0.00             |
| 1429773_at    | Dnajc22       | DnaJ (Hsp40) homolog, subfamily C,<br>member 22                                                    | Mm.30544.1                      | 10.5                                   | 9.7                                    | <b>-1.69</b>               | 0.00             |
| 1450254_at    | Tert          | telomerase reverse transcriptase                                                                   | Mm.10109.1                      | 6.9                                    | 6.2                                    | <b>-1.69</b>               | 0.05             |
| 1456941_at    | Tert          | telomerase reverse transcriptase                                                                   | Mm.38000.1                      | 6.7                                    | 6.0                                    | <b>-1.69</b>               | 0.05             |
| 1457302_at    |               | Mus musculus, clone<br>IMAGE:5367487, mRNA.; predicted<br>gene, 17491                              | Mm.34024.1                      | 8.4                                    | 7.7                                    | <b>-1.69</b>               | 0.00             |
| 1416991_at    | Mto1          | mitochondrial translation optimization<br>1 homolog (S. cerevisiae)                                | Mm.23781.1                      | 8.5                                    | 7.7                                    | <b>-1.7</b>                | 0.00             |
| 1417422_at    | Gnmt          | glycine N-methyltransferase                                                                        | Mm.29395.1                      | 14.3                                   | 13.5                                   | <b>-1.7</b>                | 0.01             |
| 1418152_at    | Hmgn5         | high-mobility group nucleosome<br>binding domain 5                                                 | Mm.20450.1                      | 9.7                                    | 9.0                                    | <b>-1.7</b>                | 0.00             |
| 1420379_at    | Slco1a1       | solute carrier organic anion<br>transporter family, member 1a1                                     | Mm.103665.1                     | 12.5                                   | 11.7                                   | <b>-1.7</b>                | 0.04             |
| 1420630_at    | 8430419L09Rik | RIKEN cDNA 8430419L09 gene                                                                         | Mm.34182.1                      | 8.4                                    | 7.7                                    | <b>-1.7</b>                | 0.00             |
| 1421346_a_at  | Slc6a6        | solute carrier family 6<br>(neurotransmitter transporter,<br>taurine), member 6                    | Mm.200518.1                     | 9.7                                    | 8.9                                    | <b>-1.7</b>                | 0.03             |
| 1424401_at    | Aldh1l1       | aldehyde dehydrogenase 1 family,<br>member L1                                                      | Mm.30035.1                      | 7.9                                    | 7.1                                    | <b>-1.7</b>                | 0.03             |
| 1426460_a_at  | Ugp2          | UDP-glucose pyrophosphorylase 2                                                                    | Mm.28877.2                      | 9.9                                    | 9.1                                    | <b>-1.7</b>                | 0.00             |
| 1428010_at    | Timm9         | translocase of inner mitochondrial<br>membrane 9                                                   | Mm.158852.1                     | 4.9                                    | 4.2                                    | <b>-1.7</b>                | 0.05             |
| 1434674_at    | Lyst          |                                                                                                    | Mm.1423.3                       | 8.1                                    | 7.3                                    | <b>-1.7</b>                | 0.00             |
| 1440146_at    | Vps13a        | vacuolar protein sorting 13A (yeast)                                                               | Mm.213679.1                     | 5.0                                    | 4.2                                    | <b>-1.7</b>                | 0.01             |
| 1443471_at    | Zbtb20        | zinc finger and BTB domain<br>containing 20                                                        | Mm.213242.1                     | 6.8                                    | 6.0                                    | <b>-1.7</b>                | 0.05             |
| 1445379_at    |               |                                                                                                    | Mm.35406.1                      | 7.5                                    | 6.8                                    | <b>-1.7</b>                | 0.01             |



**Supplemental Table 9. Significant differently expressed genes in 3bKI HCC samples**

| Affymetrix ID | Gene Symbol   | Description                                                                                       | Transcript ID<br>(Array Design) | 3aKO<br>avg<br>signal<br>log2<br>(n=4) | 3bKI<br>Avg<br>Signal<br>log2<br>(n=5) | Fold<br>Change<br>(linear) | ANOVA<br>p-value |
|---------------|---------------|---------------------------------------------------------------------------------------------------|---------------------------------|----------------------------------------|----------------------------------------|----------------------------|------------------|
| 1448400_a_at  | Smarcd2       | SWI/SNF related, matrix associated, actin dependent regulator of chromatin, subfamily d, member 2 | Mm.21772.1                      | 10.6                                   | 9.8                                    | -1.7                       | 0.00             |
| 1449954_at    | Hyal1         | hyaluronoglucosaminidase 1; N-acetyltransferase 6                                                 | Mm.10305.1                      | 9.3                                    | 8.5                                    | -1.7                       | 0.01             |
| 1455008_at    | Gna12         | guanine nucleotide binding protein, alpha 12                                                      | Mm.200500.1                     | 9.5                                    | 8.7                                    | -1.7                       | 0.00             |
| 1455728_at    | Pten          | phosphatase and tensin homolog                                                                    | Mm.220979.1                     | 9.4                                    | 8.7                                    | -1.7                       | 0.00             |
| 1416418_at    | Gabarapl1     | gamma-aminobutyric acid (GABA) A receptor-associated protein-like 1                               | Mm.14638.1                      | 11.6                                   | 10.8                                   | -1.71                      | 0.01             |
| 1420982_at    | Rbm39         | RNA binding motif protein 39                                                                      | Mm.17307.1                      | 7.6                                    | 6.8                                    | -1.71                      | 0.00             |
| 1423062_at    | Igfbp3        | insulin-like growth factor binding protein 3                                                      | Mm.29254.1                      | 7.9                                    | 7.1                                    | -1.71                      | 0.02             |
| 1428562_at    | Mir22hg       | Mir22 host gene (non-protein coding)                                                              | Mm.41393.1                      | 8.7                                    | 7.9                                    | -1.71                      | 0.01             |
| 1431012_a_at  | Eci2          | enoyl-Coenzyme A delta isomerase 2                                                                | Mm.28883.2                      | 11.5                                   | 10.7                                   | -1.71                      | 0.01             |
| 1431829_a_at  | Rgl3          | ral guanine nucleotide dissociation stimulator-like 3                                             | Mm.110594.2                     | 8.8                                    | 8.0                                    | -1.71                      | 0.00             |
| 1433068_at    | 6330582A15Rik | RIKEN cDNA 6330582A15 gene                                                                        | Mm.215199.1                     | 7.3                                    | 6.5                                    | -1.71                      | 0.00             |
| 1434394_at    | N4bp2         | NEDD4 binding protein 2                                                                           | Mm.33936.1                      | 9.3                                    | 8.5                                    | -1.71                      | 0.00             |
| 1437669_x_at  | Ccr1          | atypical chemokine receptor 4                                                                     | Mm.29762.2                      | 5.9                                    | 5.1                                    | -1.71                      | 0.03             |
| 1438397_a_at  | Rbm39         | RNA binding motif protein 39                                                                      | Mm.17307.3                      | 7.7                                    | 6.9                                    | -1.71                      | 0.00             |
| 1439074_a_at  | Son           | Son DNA binding protein                                                                           | Mm.46401.3                      | 7.3                                    | 6.5                                    | -1.71                      | 0.00             |
| 1441685_at    | Prosc         | proline synthetase co-transcribed                                                                 | Mm.101801.1                     | 5.3                                    | 4.5                                    | -1.71                      | 0.00             |
| 1445657_at    | AW111846      | expressed sequence AW111846                                                                       | Mm.36341.2                      | 8.4                                    | 7.6                                    | -1.71                      | 0.00             |
| 1451221_at    | BC018507      | interactor of little elongation complex ELL subunit 1                                             | Mm.139738.1                     | 6.8                                    | 6.0                                    | -1.71                      | 0.00             |
| 1451271_a_at  | Acat1         | acetyl-Coenzyme A acetyltransferase 1                                                             | Mm.219649.1                     | 11.6                                   | 10.8                                   | -1.71                      | 0.04             |
| 1452375_at    | Aldh4a1       | aldehyde dehydrogenase 4 family, member A1                                                        | Mm.218879.1                     | 12.1                                   | 11.4                                   | -1.71                      | 0.00             |
| 1455696_a_at  | Prpf4b        | PRP4 pre-mRNA processing factor 4 homolog B (yeast)                                               | Mm.10027.3                      | 7.3                                    | 6.5                                    | -1.71                      | 0.01             |
| 1423883_at    | Acsl1         | acyl-CoA synthetase long-chain family member 1                                                    | Mm.220964.1                     | 12.9                                   | 12.1                                   | -1.72                      | 0.00             |
| 1427957_at    | Adtrp         | androgen dependent TFPI regulating protein                                                        | Mm.25195.1                      | 11.6                                   | 10.8                                   | -1.72                      | 0.01             |
| 1428805_at    | Slc35e3       | solute carrier family 35, member E3                                                               | Mm.26071.1                      | 8.4                                    | 7.6                                    | -1.72                      | 0.03             |
| 1429538_a_at  | Sfrs18        | PNN interacting serine/arginine-rich                                                              | Mm.100117.1                     | 8.1                                    | 7.3                                    | -1.72                      | 0.01             |
| 1436318_at    | Tardbp        | TAR DNA binding protein                                                                           | Mm.220359.1                     | 7.4                                    | 6.6                                    | -1.72                      | 0.00             |
| 1439167_at    | Pecr          | peroxisomal trans-2-enoyl-CoA reductase                                                           | Mm.29988.2                      | 6.8                                    | 6.0                                    | -1.72                      | 0.01             |
| 1441718_at    |               |                                                                                                   | Mm.125543.1                     | 5.9                                    | 5.1                                    | -1.72                      | 0.01             |
| 1442615_at    |               |                                                                                                   | Mm.130736.1                     | 6.5                                    | 5.7                                    | -1.72                      | 0.00             |

**Supplemental Table 9. Significant differently expressed genes in 3bKI HCC samples**

| Affymetrix ID | Gene Symbol   | Description                                                       | Transcript ID<br>(Array Design) | 3aKO<br>avg<br>signal<br>log2<br>(n=4) | 3bKI<br>Avg<br>Signal<br>log2<br>(n=5) | Fold<br>Change<br>(linear) | ANOVA<br>p-value |
|---------------|---------------|-------------------------------------------------------------------|---------------------------------|----------------------------------------|----------------------------------------|----------------------------|------------------|
| 1452110_at    | Mtrr          | 5-methyltetrahydrofolate-homocysteine methyltransferase reductase | Mm.205514.1                     | 7.6                                    | 6.8                                    | -1.72                      | 0.00             |
| 1457034_at    | D14Abb1e      | family with sequence similarity 208, member A                     | Mm.216841.1                     | 6.9                                    | 6.1                                    | -1.72                      | 0.00             |
| 1457682_at    | Arhgap42      | Rho GTPase activating protein 42                                  | Mm.80648.1                      | 9.5                                    | 8.7                                    | -1.72                      | 0.00             |
| 1418179_at    | Atg3          | autophagy related 3                                               | Mm.41775.1                      | 6.3                                    | 5.5                                    | -1.73                      | 0.00             |
| 1423086_at    | Npc1          | Niemann-Pick type C1                                              | Mm.3484.1                       | 9.6                                    | 8.8                                    | -1.73                      | 0.01             |
| 1424353_at    | Lrpprc        | leucine-rich PPR-motif containing                                 | Mm.180895.1                     | 10.2                                   | 9.4                                    | -1.73                      | 0.00             |
| 1427711_a_at  | Ceacam1       | carcinoembryonic antigen-related cell adhesion molecule 1         | Mm.14114.6                      | 8.5                                    | 7.7                                    | -1.73                      | 0.00             |
| 1428681_at    | Gm608         | predicted gene 608                                                | Mm.21200.1                      | 8.6                                    | 7.8                                    | -1.73                      | 0.00             |
| 1428908_at    | Rbm25         | RNA binding motif protein 25                                      | Mm.46005.1                      | 6.8                                    | 6.0                                    | -1.73                      | 0.01             |
| 1434293_at    | Hectd3        | HECT domain containing 3                                          | Mm.220986.1                     | 7.3                                    | 6.5                                    | -1.73                      | 0.01             |
| 1434311_at    | Cnot6l        | CCR4-NOT transcription complex, subunit 6-like                    | Mm.28374.2                      | 8.1                                    | 7.3                                    | -1.73                      | 0.00             |
| 1438391_x_at  | Hsd17b10      | hydroxysteroid (17-beta) dehydrogenase 10                         | Mm.6994.2                       | 9.0                                    | 8.2                                    | -1.73                      | 0.01             |
| 1449118_at    | Dbt           | dihydrolipoamide branched chain transacylase E2                   | Mm.3636.1                       | 10.0                                   | 9.2                                    | -1.73                      | 0.00             |
| 1455878_at    | Dancr         | differentiation antagonizing non-protein coding RNA               | Mm.46547.1                      | 7.3                                    | 6.5                                    | -1.73                      | 0.00             |
| 1455958_s_at  | Pptc7         | PTC7 protein phosphatase homolog (S. cerevisiae)                  | Mm.200168.1                     | 9.1                                    | 8.3                                    | -1.73                      | 0.00             |
| 1457673_at    | 2610005L07Rik | cadherin 11 pseudogene                                            | Mm.80617.1                      | 6.4                                    | 5.6                                    | -1.73                      | 0.00             |
| 1419037_at    | Csnk2a1       | casein kinase 2, alpha 1 polypeptide                              | Mm.23692.1                      | 9.5                                    | 8.7                                    | -1.74                      | 0.00             |
| 1424886_at    | Ptprd         | protein tyrosine phosphatase, receptor type, D                    | Mm.89191.1                      | 10.5                                   | 9.7                                    | -1.74                      | 0.00             |
| 1426060_at    |               |                                                                   | Mm.212861.1                     | 7.3                                    | 6.5                                    | -1.74                      | 0.00             |
| 1429052_at    | Ptprd         | protein tyrosine phosphatase, receptor type, D                    | Mm.41736.1                      | 10.7                                   | 9.9                                    | -1.74                      | 0.01             |
| 1434642_at    | Hsd17b11      | hydroxysteroid (17-beta) dehydrogenase 11                         | Mm.1187.2                       | 12.7                                   | 11.9                                   | -1.74                      | 0.02             |
| 1436966_at    | Peli2         | pellino 2                                                         | Mm.51196.1                      | 7.1                                    | 6.3                                    | -1.74                      | 0.00             |
| 1446143_at    |               |                                                                   | Mm.208356.1                     | 5.7                                    | 4.9                                    | -1.74                      | 0.00             |
| 1455255_at    | 4833420G11Rik | GID complex subunit 8 homolog (S. cerevisiae)                     | Mm.29561.2                      | 7.6                                    | 6.8                                    | -1.74                      | 0.00             |
| 1458962_at    | Tmed5         | transmembrane emp24 protein transport domain containing 5         | Mm.33047.1                      | 5.3                                    | 4.5                                    | -1.74                      | 0.01             |
| 1459398_at    | Peli1         | pellino 1                                                         | Mm.209921.1                     | 3.6                                    | 2.8                                    | -1.74                      | 0.00             |
| 1415826_at    | Atp6v1h       | ATPase, H+ transporting, lysosomal V1 subunit H                   | Mm.27082.1                      | 8.9                                    | 8.1                                    | -1.75                      | 0.00             |
| 1416631_at    | Ap4b1         | adaptor-related protein complex AP-4, beta 1                      | Mm.29234.1                      | 7.7                                    | 6.9                                    | -1.75                      | 0.00             |
| 1422868_s_at  | Gda           | guanine deaminase                                                 | Mm.45054.1                      | 6.5                                    | 5.7                                    | -1.75                      | 0.03             |

**Supplemental Table 9. Significant differently expressed genes in 3bKI HCC samples**

| <b>Affymetrix ID</b> | <b>Gene Symbol</b> | <b>Description</b>                                                                                                                             | <b>Transcript ID<br/>(Array Design)</b> | <b>3aKO<br/>avg<br/>signal<br/>log2<br/>(n=4)</b> | <b>3bKI<br/>Avg<br/>Signal<br/>log2<br/>(n=5)</b> | <b>Fold<br/>Change<br/>(linear)</b> | <b>ANOVA<br/>p-value</b> |
|----------------------|--------------------|------------------------------------------------------------------------------------------------------------------------------------------------|-----------------------------------------|---------------------------------------------------|---------------------------------------------------|-------------------------------------|--------------------------|
| 1423495_at           | Decr2              | 2-4-dienoyl-Coenzyme A reductase 2, peroxisomal                                                                                                | Mm.35760.1                              | 11.7                                              | 10.9                                              | <b>-1.75</b>                        | 0.04                     |
| 1423564_a_at         | Paics              | phosphoribosylaminoimidazole carboxylase, phosphoribosylaminoribosylaminoimidazole, succinocarboxamide synthetase                              | Mm.182931.1                             | 11.5                                              | 10.7                                              | <b>-1.75</b>                        | 0.00                     |
| 1426008_a_at         | Slc7a2             | solute carrier family 7 (cationic amino acid transporter, y+ system), member 2                                                                 | Mm.4676.2                               | 9.3                                               | 8.5                                               | <b>-1.75</b>                        | 0.03                     |
| 1433781_a_at         | Cldn12             | claudin 12                                                                                                                                     | Mm.40132.1                              | 9.6                                               | 8.8                                               | <b>-1.75</b>                        | 0.00                     |
| 1435075_at           | Tmem106b           | transmembrane protein 106B                                                                                                                     | Mm.27742.1                              | 9.0                                               | 8.2                                               | <b>-1.75</b>                        | 0.00                     |
| 1437424_at           | Syde2              | synapse defective 1, Rho GTPase, homolog 2 (C. elegans)                                                                                        | Mm.24692.1                              | 7.8                                               | 7.0                                               | <b>-1.75</b>                        | 0.01                     |
| 1438081_at           | Mcc                | mutated in colorectal cancers                                                                                                                  | Mm.210479.1                             | 6.6                                               | 5.8                                               | <b>-1.75</b>                        | 0.01                     |
| 1438418_at           | Ap5m1              | adaptor-related protein complex 5, mu 1 subunit                                                                                                | Mm.87037.2                              | 7.6                                               | 6.8                                               | <b>-1.75</b>                        | 0.02                     |
| 1441733_s_at         | Nup153             | nucleoporin 153                                                                                                                                | Mm.219831.1                             | 5.5                                               | 4.7                                               | <b>-1.75</b>                        | 0.00                     |
| 1443579_s_at         | Deptor             | DEP domain containing MTOR-interacting protein                                                                                                 | Mm.220905.1                             | 9.1                                               | 8.3                                               | <b>-1.75</b>                        | 0.00                     |
| 1443628_at           |                    |                                                                                                                                                | Mm.44833.1                              | 6.0                                               | 5.2                                               | <b>-1.75</b>                        | 0.00                     |
| 1445928_at           | March6             | membrane-associated ring finger (C3HC4) 6                                                                                                      | Mm.173425.1                             | 6.9                                               | 6.1                                               | <b>-1.75</b>                        | 0.01                     |
| 1450090_at           | Zfp101             | zinc finger protein 101                                                                                                                        | Mm.4417.1                               | 7.0                                               | 6.2                                               | <b>-1.75</b>                        | 0.00                     |
| 1460468_s_at         | Dnajc22            | DnaJ (Hsp40) homolog, subfamily C, member 22                                                                                                   | Mm.30544.1                              | 10.8                                              | 10.0                                              | <b>-1.75</b>                        | 0.00                     |
| 1425034_at           | Slc17a2            | solute carrier family 17 (sodium phosphate), member 2                                                                                          | Mm.24030.1                              | 8.9                                               | 8.1                                               | <b>-1.76</b>                        | 0.01                     |
| 1428904_at           | Ammecr1l           | AMME chromosomal region gene 1-like                                                                                                            | Mm.86513.1                              | 9.4                                               | 8.5                                               | <b>-1.76</b>                        | 0.00                     |
| 1434280_at           |                    | Mus musculus 8 days embryo whole body cDNA, RIKEN full-length enriched library, clone:5730463B09 product:unclassifiable, full insert sequence. | Mm.30502.2                              | 5.5                                               | 4.7                                               | <b>-1.76</b>                        | 0.02                     |
| 1434393_at           | Usp34              | ubiquitin specific peptidase 34                                                                                                                | Mm.13148.1                              | 7.6                                               | 6.8                                               | <b>-1.76</b>                        | 0.00                     |
| 1434742_s_at         | Aifm3              | apoptosis-inducing factor, mitochondrion-associated 3                                                                                          | Mm.40038.2                              | 7.0                                               | 6.1                                               | <b>-1.76</b>                        | 0.01                     |
| 1438649_x_at         | Pebp1              | phosphatidylethanolamine binding protein 1                                                                                                     | Mm.195898.6                             | 13.3                                              | 12.5                                              | <b>-1.76</b>                        | 0.05                     |
| 1443323_at           | Trmt13             | tRNA methyltransferase 13                                                                                                                      | Mm.138136.1                             | 3.6                                               | 2.8                                               | <b>-1.76</b>                        | 0.02                     |
| 1446193_at           |                    |                                                                                                                                                | Mm.207675.1                             | 3.8                                               | 3.0                                               | <b>-1.76</b>                        | 0.01                     |
| 1449844_at           | Slco1a1            | solute carrier organic anion transporter family, member 1a1                                                                                    | Mm.103665.1                             | 11.7                                              | 10.9                                              | <b>-1.76</b>                        | 0.05                     |

**Supplemental Table 9. Significant differently expressed genes in 3bKI HCC samples**

| Affymetrix ID | Gene Symbol   | Description                                                          | Transcript ID<br>(Array Design) | 3aKO<br>avg<br>signal<br>log2<br>(n=4) | 3bKI<br>Avg<br>Signal<br>log2<br>(n=5) | Fold<br>Change<br>(linear) | ANOVA<br>p-value |
|---------------|---------------|----------------------------------------------------------------------|---------------------------------|----------------------------------------|----------------------------------------|----------------------------|------------------|
| 1453065_at    | Aldh5a1       | aldehyde dehydrogenase family 5, subfamily A1                        | Mm.100159.1                     | 9.8                                    | 9.0                                    | -1.76                      | 0.00             |
| 1453783_at    | Pura          | purine rich element binding protein A                                | Mm.214568.1                     | 5.6                                    | 4.7                                    | -1.76                      | 0.00             |
| 1455446_x_at  | Acadsb        | acyl-Coenzyme A dehydrogenase, short/branched chain                  | Mm.28430.3                      | 10.6                                   | 9.8                                    | -1.76                      | 0.00             |
| 1458235_at    |               |                                                                      | Mm.214663.1                     | 6.0                                    | 5.2                                    | -1.76                      | 0.00             |
| 1418279_a_at  | Akap1         | A kinase (PRKA) anchor protein 1                                     | Mm.2969.1                       | 9.2                                    | 8.4                                    | -1.77                      | 0.00             |
| 1427342_at    | Fastkd1       | FAST kinase domains 1                                                | Mm.221029.1                     | 8.7                                    | 7.9                                    | -1.77                      | 0.00             |
| 1428926_at    | Fbxo31        | F-box protein 31                                                     | Mm.41330.1                      | 8.4                                    | 7.6                                    | -1.77                      | 0.00             |
| 1431109_at    | Prr16         | proline rich 16                                                      | Mm.63546.1                      | 8.8                                    | 7.9                                    | -1.77                      | 0.00             |
| 1431199_at    | Ggnbp1        | gametogenetin binding protein 1                                      | Mm.105357.1                     | 7.6                                    | 6.8                                    | -1.77                      | 0.00             |
| 1434628_a_at  | Rhpn2         | rhophilin, Rho GTPase binding protein 2                              | Mm.35465.4                      | 7.2                                    | 6.4                                    | -1.77                      | 0.00             |
| 1434766_at    | Prkaa2        | protein kinase, AMP-activated, alpha 2 catalytic subunit             | Mm.10344.1                      | 9.2                                    | 8.4                                    | -1.77                      | 0.00             |
| 1437410_at    | Aldh2         | aldehyde dehydrogenase 2, mitochondrial                              | Mm.132896.1                     | 9.9                                    | 9.1                                    | -1.77                      | 0.04             |
| 1440883_at    | Usp6nl        | USP6 N-terminal like                                                 | Mm.86484.1                      | 7.5                                    | 6.7                                    | -1.77                      | 0.00             |
| 1441242_at    |               |                                                                      | Mm.133119.1                     | 6.8                                    | 6.0                                    | -1.77                      | 0.02             |
| 1449337_at    | Tdo2          | tryptophan 2,3-dioxygenase                                           | Mm.21545.1                      | 11.7                                   | 10.9                                   | -1.77                      | 0.00             |
| 1452416_at    | Il6ra         | interleukin 6 receptor, alpha                                        | Mm.2856.2                       | 9.1                                    | 8.3                                    | -1.77                      | 0.01             |
| 1416775_at    | Atp5sl        | ATP5S-like                                                           | Mm.24062.1                      | 8.1                                    | 7.3                                    | -1.78                      | 0.00             |
| 1425688_a_at  | Dpys          | dihydropyrimidinase                                                  | Mm.30994.2                      | 11.7                                   | 10.9                                   | -1.78                      | 0.02             |
| 1426896_at    | Zfp191        | zinc finger protein 191                                              | Mm.153618.1                     | 6.5                                    | 5.6                                    | -1.78                      | 0.00             |
| 1428338_at    | Spata2l       | spermatogenesis associated 2-like                                    | Mm.41459.1                      | 8.3                                    | 7.5                                    | -1.78                      | 0.01             |
| 1428592_s_at  | Usp38         | ubiquitin specific peptidase 38                                      | Mm.200389.1                     | 6.8                                    | 6.0                                    | -1.78                      | 0.00             |
| 1434408_at    | Atxn3         | ataxin 3                                                             | Mm.30782.1                      | 6.2                                    | 5.4                                    | -1.78                      | 0.00             |
| 1437128_a_at  | Zfp945        | zinc finger protein 945                                              | Mm.33710.2                      | 7.0                                    | 6.1                                    | -1.78                      | 0.00             |
| 1441204_at    | A130019P10Rik | RIKEN cDNA A130019P10 gene                                           | Mm.207398.1                     | 6.0                                    | 5.2                                    | -1.78                      | 0.00             |
| 1442470_at    |               |                                                                      | Mm.172615.1                     | 5.2                                    | 4.4                                    | -1.78                      | 0.00             |
| 1443305_at    | Gm3134        | predicted gene 3134                                                  | Mm.212496.1                     | 4.1                                    | 3.3                                    | -1.78                      | 0.02             |
| 1455091_at    | Ppp2r3a       | protein phosphatase 2, regulatory subunit B", alpha                  | Mm.28416.1                      | 6.5                                    | 5.7                                    | -1.78                      | 0.00             |
| 1457486_at    |               |                                                                      | Mm.218159.1                     | 8.7                                    | 7.8                                    | -1.78                      | 0.02             |
| 1417042_at    | Slc37a4       | solute carrier family 37 (glucose-6-phosphate transporter), member 4 | Mm.30087.1                      | 11.7                                   | 10.9                                   | -1.79                      | 0.01             |
| 1429057_at    | Naa16         | N(alpha)-acetyltransferase 16, NatA auxiliary subunit                | Mm.24425.1                      | 7.4                                    | 6.6                                    | -1.79                      | 0.00             |
| 1429332_at    | 4632427E13Rik | RIKEN cDNA 4632427E13 gene                                           | Mm.45354.1                      | 6.0                                    | 5.2                                    | -1.79                      | 0.00             |
| 1437354_at    | C230091D08Rik | RIKEN cDNA C230091D08 gene                                           | Mm.132544.3                     | 7.7                                    | 6.8                                    | -1.79                      | 0.00             |
| 1439795_at    | Gpr64         | G protein-coupled receptor 64                                        | Mm.31520.1                      | 4.6                                    | 3.8                                    | -1.79                      | 0.04             |
| 1442525_at    | Ccdc47        | coiled-coil domain containing 47                                     | Mm.101379.1                     | 5.6                                    | 4.7                                    | -1.79                      | 0.00             |
| 1443872_at    |               |                                                                      | Mm.41941.1                      | 7.0                                    | 6.2                                    | -1.79                      | 0.00             |
| 1448385_at    | Slc15a4       | solute carrier family 15, member 4                                   | Mm.28506.1                      | 9.2                                    | 8.3                                    | -1.79                      | 0.01             |
| 1453385_at    | Xiap          | X-linked inhibitor of apoptosis                                      | Mm.57689.1                      | 5.1                                    | 4.3                                    | -1.79                      | 0.01             |

**Supplemental Table 9. Significant differently expressed genes in 3bKI HCC samples**

| Affymetrix ID | Gene Symbol   | Description                                                            | Transcript ID<br>(Array Design) | 3aKO<br>avg<br>signal<br>log2<br>(n=4) | 3bKI<br>Avg<br>Signal<br>log2<br>(n=5) | Fold<br>Change<br>(linear) | ANOVA<br>p-value |
|---------------|---------------|------------------------------------------------------------------------|---------------------------------|----------------------------------------|----------------------------------------|----------------------------|------------------|
| 1456611_at    | Fam13a        | family with sequence similarity 13, member A                           | Mm.28813.1                      | 8.3                                    | 7.4                                    | <b>-1.79</b>               | 0.01             |
| 1457367_at    |               |                                                                        | Mm.128883.1                     | 6.5                                    | 5.7                                    | <b>-1.79</b>               | 0.00             |
| 1457672_at    | Chd9          | chromodomain helicase DNA binding protein 9                            | Mm.100615.1                     | 7.5                                    | 6.6                                    | <b>-1.79</b>               | 0.00             |
| 1416193_at    | Car1          | carbonic anhydrase 1                                                   | Mm.3471.1                       | 6.8                                    | 5.9                                    | <b>-1.8</b>                | 0.02             |
| 1417600_at    | Slc15a2       | solute carrier family 15 (H+/peptide transporter), member 2            | Mm.63479.1                      | 8.1                                    | 7.2                                    | <b>-1.8</b>                | 0.03             |
| 1418311_at    | Fn3k          | fructosamine 3 kinase                                                  | Mm.32787.1                      | 7.8                                    | 6.9                                    | <b>-1.8</b>                | 0.00             |
| 1420043_s_at  | Thoc1         | THO complex 1                                                          | Mm.202015.1                     | 4.6                                    | 3.7                                    | <b>-1.8</b>                | 0.01             |
| 1427480_at    | Leap2         | liver-expressed antimicrobial peptide 2                                | Mm.24283.1                      | 11.3                                   | 10.5                                   | <b>-1.8</b>                | 0.02             |
| 1433407_at    | Mcm10         | minichromosome maintenance deficient 10 ( <i>S. cerevisiae</i> )       | Mm.23828.1                      | 6.3                                    | 5.4                                    | <b>-1.8</b>                | 0.02             |
| 1433986_at    | Smim13        | small integral membrane protein 13                                     | Mm.38578.1                      | 9.0                                    | 8.2                                    | <b>-1.8</b>                | 0.00             |
| 1438050_x_at  | Gm9222        | predicted gene 9222                                                    | Mm.212712.4                     | 5.9                                    | 5.1                                    | <b>-1.8</b>                | 0.00             |
| 1439988_at    | Mrpl15        | mitochondrial ribosomal protein L15                                    | Mm.172125.1                     | 7.3                                    | 6.4                                    | <b>-1.8</b>                | 0.00             |
| 1451006_at    | Xdh           | xanthine dehydrogenase                                                 | Mm.11223.1                      | 9.1                                    | 8.2                                    | <b>-1.8</b>                | 0.04             |
| 1457175_at    |               |                                                                        | Mm.100049.1                     | 6.3                                    | 5.4                                    | <b>-1.8</b>                | 0.00             |
| 1458099_at    |               |                                                                        | Mm.214692.1                     | 7.8                                    | 6.9                                    | <b>-1.8</b>                | 0.02             |
| 1420451_at    | Asic5         | acid-sensing (proton-gated) ion channel family member 5                | Mm.88839.1                      | 6.2                                    | 5.4                                    | <b>-1.81</b>               | 0.00             |
| 1421704_a_at  | Pik3c2g       | phosphatidylinositol 3-kinase, C2 domain containing, gamma polypeptide | Mm.10301.1                      | 8.0                                    | 7.2                                    | <b>-1.81</b>               | 0.00             |
| 1426706_s_at  | Xylb          | xylulokinase homolog ( <i>H. influenzae</i> )                          | Mm.27002.1                      | 10.1                                   | 9.2                                    | <b>-1.81</b>               | 0.01             |
| 1428410_at    | Naa50         | N(alpha)-acetyltransferase 50, NatE catalytic subunit                  | Mm.28064.1                      | 8.1                                    | 7.3                                    | <b>-1.81</b>               | 0.00             |
| 1430220_at    | 4833420G17Rik | RIKEN cDNA 4833420G17 gene                                             | Mm.170194.1                     | 6.0                                    | 5.2                                    | <b>-1.81</b>               | 0.00             |
| 1435462_at    | Plcx2         | phosphatidylinositol-specific phospholipase C, X domain containing 2   | Mm.41360.1                      | 10.3                                   | 9.5                                    | <b>-1.81</b>               | 0.01             |
| 1435470_at    | 1810015C11Rik | uncharacterized LOC101056118                                           | Mm.102063.1                     | 8.0                                    | 7.1                                    | <b>-1.81</b>               | 0.01             |
| 1437791_s_at  | Eml5          | echinoderm microtubule associated protein like 5                       | Mm.25549.4                      | 5.5                                    | 4.7                                    | <b>-1.81</b>               | 0.00             |
| 1438279_at    | Dpp4          | dipeptidylpeptidase 4                                                  | Mm.132862.1                     | 7.2                                    | 6.3                                    | <b>-1.81</b>               | 0.00             |
| 1443049_at    | Tmem19        | transmembrane protein 19                                               | Mm.215567.1                     | 7.2                                    | 6.4                                    | <b>-1.81</b>               | 0.03             |
| 1449214_a_at  | Opa1          | optic atrophy 1                                                        | Mm.31402.1                      | 9.0                                    | 8.1                                    | <b>-1.81</b>               | 0.00             |
| 1451762_a_at  | Kif1b         | kinesin family member 1B                                               | Mm.42027.3                      | 7.5                                    | 6.7                                    | <b>-1.81</b>               | 0.02             |
| 1416419_s_at  | Gabarapl1     | gamma-aminobutyric acid (GABA) A receptor-associated protein-like 1    | Mm.14638.1                      | 12.8                                   | 12.0                                   | <b>-1.82</b>               | 0.01             |
| 1416730_at    | Rcl1          | RNA terminal phosphate cyclase-like 1                                  | Mm.28630.1                      | 11.0                                   | 10.1                                   | <b>-1.82</b>               | 0.00             |
| 1417067_s_at  | Adck3         | aarF domain containing kinase 3                                        | Mm.28337.1                      | 6.9                                    | 6.0                                    | <b>-1.82</b>               | 0.00             |
| 1417280_at    | Slc17a1       | solute carrier family 17 (sodium phosphate), member 1                  | Mm.2656.1                       | 8.6                                    | 7.8                                    | <b>-1.82</b>               | 0.00             |

**Supplemental Table 9. Significant differently expressed genes in 3bKI HCC samples**

| <b>Affymetrix ID</b> | <b>Gene Symbol</b> | <b>Description</b>                                                                             | <b>Transcript ID<br/>(Array Design)</b> | <b>3aKO<br/>avg<br/>signal<br/>log2<br/>(n=4)</b> | <b>3bKI<br/>Avg<br/>Signal<br/>log2<br/>(n=5)</b> | <b>Fold<br/>Change<br/>(linear)</b> | <b>ANOVA<br/>p-value</b> |
|----------------------|--------------------|------------------------------------------------------------------------------------------------|-----------------------------------------|---------------------------------------------------|---------------------------------------------------|-------------------------------------|--------------------------|
| 1419245_at           | Rab14              | RAB14, member RAS oncogene family                                                              | Mm.58771.1                              | 5.5                                               | 4.6                                               | <b>-1.82</b>                        | 0.00                     |
| 1420951_a_at         | Son                | Son DNA binding protein                                                                        | Mm.46401.1                              | 7.1                                               | 6.3                                               | <b>-1.82</b>                        | 0.00                     |
| 1428651_at           | Klhl24             | kelch-like 24                                                                                  | Mm.181757.1                             | 9.1                                               | 8.2                                               | <b>-1.82</b>                        | 0.00                     |
| 1434977_at           | Fam210a            | family with sequence similarity 210, member A                                                  | Mm.171701.1                             | 7.9                                               | 7.0                                               | <b>-1.82</b>                        | 0.00                     |
| 1438450_at           | Lin7a              | lin-7 homolog A (C. elegans)                                                                   | Mm.141274.1                             | 7.7                                               | 6.9                                               | <b>-1.82</b>                        | 0.00                     |
| 1441283_at           |                    | cyclin Y                                                                                       | Mm.37824.1                              | 4.6                                               | 3.7                                               | <b>-1.82</b>                        | 0.00                     |
| 1442815_at           |                    |                                                                                                | Mm.33686.1                              | 6.8                                               | 5.9                                               | <b>-1.82</b>                        | 0.00                     |
| 1448185_at           | Herpud1            | homocysteine-inducible, endoplasmic reticulum stress-inducible, ubiquitin-like domain member 1 | Mm.29151.1                              | 12.1                                              | 11.2                                              | <b>-1.82</b>                        | 0.00                     |
| 1449886_a_at         | Timm9              | translocase of inner mitochondrial membrane 9                                                  | Mm.28996.1                              | 6.2                                               | 5.3                                               | <b>-1.82</b>                        | 0.03                     |
| 1450816_at           | Polg2              | polymerase (DNA directed), gamma 2, accessory subunit                                          | Mm.859.1                                | 8.3                                               | 7.4                                               | <b>-1.82</b>                        | 0.00                     |
| 1452831_s_at         | Ppat               | phosphoribosyl pyrophosphate amidotransferase                                                  | Mm.27743.1                              | 7.8                                               | 6.9                                               | <b>-1.82</b>                        | 0.02                     |
| 1453840_at           | Pabpc1             | poly(A) binding protein, cytoplasmic 1                                                         | Mm.2642.2                               | 5.9                                               | 5.0                                               | <b>-1.82</b>                        | 0.00                     |
| 1457999_at           | Rmdn1              | regulator of microtubule dynamics 1                                                            | Mm.168010.2                             | 7.9                                               | 7.1                                               | <b>-1.82</b>                        | 0.00                     |
| 1458913_at           | 4831440E17Rik      | RIKEN cDNA 4831440E17 gene                                                                     | Mm.156689.1                             | 4.8                                               | 3.9                                               | <b>-1.82</b>                        | 0.00                     |
| 1440658_at           | Ammecr1l           | AMME chromosomal region gene 1-like                                                            | Mm.138551.1                             | 6.2                                               | 5.3                                               | <b>-1.83</b>                        | 0.01                     |
| 1447854_s_at         | Hist2h2be          | histone cluster 2, H2be                                                                        | Mm.200193.1                             | 4.5                                               | 3.7                                               | <b>-1.83</b>                        | 0.02                     |
| 1459957_at           |                    |                                                                                                | Mm.102973.1                             | 6.7                                               | 5.8                                               | <b>-1.83</b>                        | 0.00                     |
| 1419093_at           | Tdo2               | tryptophan 2,3-dioxygenase                                                                     | Mm.21545.1                              | 13.3                                              | 12.4                                              | <b>-1.84</b>                        | 0.00                     |
| 1419367_at           | Decr1              | 2,4-dienoyl CoA reductase 1, mitochondrial                                                     | Mm.24395.1                              | 12.2                                              | 11.3                                              | <b>-1.84</b>                        | 0.04                     |
| 1424744_at           | Sds                | serine dehydratase                                                                             | Mm.28685.1                              | 11.7                                              | 10.9                                              | <b>-1.84</b>                        | 0.01                     |
| 1434480_at           | Pdpr               | pyruvate dehydrogenase phosphatase regulatory subunit                                          | Mm.28350.1                              | 7.6                                               | 6.7                                               | <b>-1.84</b>                        | 0.00                     |
| 1435452_at           | Slc35g1            | solute carrier family 35, member G1                                                            | Mm.123755.1                             | 8.9                                               | 8.1                                               | <b>-1.84</b>                        | 0.00                     |
| 1446990_at           | Nfia               | nuclear factor I/A                                                                             | Mm.103170.1                             | 8.4                                               | 7.6                                               | <b>-1.84</b>                        | 0.00                     |
| 1421026_at           | Gna12              | guanine nucleotide binding protein, alpha 12                                                   | Mm.140610.1                             | 8.3                                               | 7.5                                               | <b>-1.85</b>                        | 0.01                     |
| 1422648_at           | Slc7a2             | solute carrier family 7 (cationic amino acid transporter, y+ system), member 2                 | Mm.4676.1                               | 9.2                                               | 8.4                                               | <b>-1.85</b>                        | 0.01                     |
| 1425033_at           | Slc17a2            | solute carrier family 17 (sodium phosphate), member 2                                          | Mm.24030.1                              | 11.6                                              | 10.7                                              | <b>-1.85</b>                        | 0.01                     |
| 1431174_at           | A930036K24Rik      |                                                                                                | Mm.134224.1                             | 8.6                                               | 7.7                                               | <b>-1.85</b>                        | 0.02                     |
| 1435334_at           | Ttc7               | tetratricopeptide repeat domain 7                                                              | Mm.77396.2                              | 8.9                                               | 8.0                                               | <b>-1.85</b>                        | 0.00                     |
| 1441988_at           | Ppm1k              | protein phosphatase 1K (PP2C domain containing)                                                | Mm.216238.1                             | 8.9                                               | 8.0                                               | <b>-1.85</b>                        | 0.01                     |
| 1442169_at           | Vldlr              | very low density lipoprotein receptor                                                          | Mm.202246.1                             | 6.4                                               | 5.5                                               | <b>-1.85</b>                        | 0.02                     |

**Supplemental Table 9. Significant differently expressed genes in 3bKI HCC samples**

| Affymetrix ID | Gene Symbol   | Description                                                                    | Transcript ID<br>(Array Design) | 3aKO<br>avg<br>signal<br>log2<br>(n=4) | 3bKI<br>Avg<br>Signal<br>log2<br>(n=5) | Fold<br>Change<br>(linear) | ANOVA<br>p-value |
|---------------|---------------|--------------------------------------------------------------------------------|---------------------------------|----------------------------------------|----------------------------------------|----------------------------|------------------|
| 1444458_at    |               |                                                                                | Mm.80567.1                      | 7.4                                    | 6.5                                    | -1.85                      | 0.00             |
| 1420118_s_at  |               |                                                                                | Mm.221024.1                     | 7.3                                    | 6.4                                    | -1.86                      | 0.00             |
| 1433545_s_at  | Acad11        | acyl-Coenzyme A dehydrogenase family, member 11                                | Mm.41274.4                      | 11.9                                   | 11.0                                   | -1.86                      | 0.01             |
| 1439079_a_at  | ErbB2ip       | ErbB2 interacting protein                                                      | Mm.27107.3                      | 7.0                                    | 6.1                                    | -1.86                      | 0.00             |
| 1440899_at    | Fmo5          | flavin containing monooxygenase 5                                              | Mm.89547.1                      | 9.9                                    | 9.0                                    | -1.86                      | 0.02             |
| 1447811_s_at  | Amigo1        | adhesion molecule with Ig like domain 1                                        | Mm.44915.2                      | 6.2                                    | 5.3                                    | -1.86                      | 0.00             |
| 1454801_at    | Ankrd28       |                                                                                | Mm.7463.1                       | 8.1                                    | 7.2                                    | -1.86                      | 0.00             |
| 1455381_at    | Marf1         | meiosis arrest female 1                                                        | Mm.85442.1                      | 8.3                                    | 7.4                                    | -1.86                      | 0.00             |
| 1425559_a_at  | AcsM3         | acyl-CoA synthetase medium-chain family member 3                               | Mm.9821.2                       | 9.9                                    | 9.0                                    | -1.87                      | 0.01             |
| 1430410_at    | 1810019N24Rik | RIKEN cDNA 1810019N24 gene                                                     | Mm.158236.1                     | 5.0                                    | 4.1                                    | -1.87                      | 0.00             |
| 1441022_at    | Arih1         | ariadne ubiquitin-conjugating enzyme E2 binding protein homolog 1 (Drosophila) | Mm.126328.1                     | 6.0                                    | 5.1                                    | -1.87                      | 0.00             |
| 1444080_at    | Nav2          | neuron navigator 2                                                             | Mm.101203.1                     | 6.3                                    | 5.4                                    | -1.87                      | 0.00             |
| 1449292_at    | Rb1cc1        | RB1-inducible coiled-coil 1                                                    | Mm.141567.1                     | 5.8                                    | 4.9                                    | -1.87                      | 0.00             |
| 1449668_s_at  | Fnip1         | folliculin interacting protein 1                                               | Mm.203784.1                     | 7.9                                    | 7.0                                    | -1.87                      | 0.01             |
| 1450896_at    | Arhgap5       |                                                                                | Mm.35059.1                      | 5.6                                    | 4.7                                    | -1.87                      | 0.00             |
| 1458491_at    | Zfp949        | zinc finger protein 949                                                        | Mm.101162.1                     | 7.0                                    | 6.1                                    | -1.87                      | 0.00             |
| 1459463_at    |               |                                                                                | Mm.207860.1                     | 4.3                                    | 3.4                                    | -1.87                      | 0.01             |
| 1436326_at    | Rora          | RAR-related orphan receptor alpha                                              | Mm.88712.1                      | 8.0                                    | 7.1                                    | -1.88                      | 0.01             |
| 1439024_at    | Bag4          | BCL2-associated athanogene 4                                                   | Mm.35264.1                      | 9.2                                    | 8.3                                    | -1.88                      | 0.01             |
| 1443949_at    |               |                                                                                | Mm.24932.1                      | 6.9                                    | 6.0                                    | -1.88                      | 0.01             |
| 1455961_at    |               | membrane metallo endopeptidase                                                 | Mm.13052.2                      | 8.0                                    | 7.1                                    | -1.88                      | 0.00             |
| 1457458_at    | Zc3h4         | zinc finger CCCH-type containing 4                                             | Mm.164114.1                     | 5.5                                    | 4.6                                    | -1.88                      | 0.01             |
| 1429299_at    | Ddah1         | dimethylarginine dimethylaminohydrolase 1                                      | Mm.30203.1                      | 9.5                                    | 8.6                                    | -1.89                      | 0.03             |
| 1429899_at    | 5730414N17Rik | RIKEN cDNA 5730414N17 gene                                                     | Mm.112365.1                     | 7.3                                    | 6.4                                    | -1.89                      | 0.01             |
| 1434100_x_at  | Ppargc1a      | peroxisome proliferative activated receptor, gamma, coactivator 1 alpha        | Mm.35687.3                      | 5.2                                    | 4.2                                    | -1.89                      | 0.00             |
| 1434515_at    | Ncoa1         | nuclear receptor coactivator 1                                                 | Mm.2028.3                       | 8.1                                    | 7.2                                    | -1.89                      | 0.01             |
| 1435836_at    | Pdk1          | pyruvate dehydrogenase kinase, isoenzyme 1                                     | Mm.137538.1                     | 8.6                                    | 7.7                                    | -1.89                      | 0.01             |
| 1438271_at    | Lpp           | LIM domain containing preferred translocation partner in lipoma                | Mm.196783.1                     | 8.2                                    | 7.3                                    | -1.89                      | 0.00             |
| 1455014_at    | Gm20300       | predicted gene, 20300                                                          | Mm.86217.1                      | 8.9                                    | 7.9                                    | -1.89                      | 0.00             |
| 1459917_at    | Ggnbp2        | gametogenetin binding protein 2                                                | Mm.25583.1                      | 7.1                                    | 6.2                                    | -1.89                      | 0.00             |
| 1418138_at    | Sult1d1       | sulfotransferase family 1D, member 1                                           | Mm.6824.1                       | 9.6                                    | 8.6                                    | -1.9                       | 0.04             |
| 1451360_at    | Ergic2        | ERGIC and golgi 2                                                              | Mm.22179.1                      | 5.9                                    | 4.9                                    | -1.9                       | 0.00             |
| 1455146_at    | Strbp         | spermatid perinuclear RNA binding protein                                      | Mm.40554.1                      | 6.0                                    | 5.1                                    | -1.9                       | 0.01             |
| 1416739_a_at  | Brap          | BRCA1 associated protein                                                       | Mm.153372.1                     | 8.1                                    | 7.2                                    | -1.91                      | 0.01             |
| 1425362_at    | Agfg2         | ArfGAP with FG repeats 2                                                       | Mm.35097.1                      | 7.4                                    | 6.5                                    | -1.91                      | 0.00             |

**Supplemental Table 9. Significant differently expressed genes in 3bKI HCC samples**

| Affymetrix ID | Gene Symbol   | Description                                                                                             | Transcript ID<br>(Array Design) | 3aKO<br>avg<br>signal<br>log2<br>(n=4) | 3bKI<br>Avg<br>Signal<br>log2<br>(n=5) | Fold<br>Change<br>(linear) | ANOVA<br>p-value |
|---------------|---------------|---------------------------------------------------------------------------------------------------------|---------------------------------|----------------------------------------|----------------------------------------|----------------------------|------------------|
| 1428414_at    | Ccny          | cyclin Y                                                                                                | Mm.41707.1                      | 3.8                                    | 2.9                                    | <b>-1.91</b>               | 0.00             |
| 1424585_at    | Ranbp10       | RAN binding protein 10                                                                                  | Mm.4206.1                       | 8.9                                    | 8.0                                    | <b>-1.92</b>               | 0.05             |
| 1427037_at    | Eif4g1        | eukaryotic translation initiation factor<br>4, gamma 1                                                  | Mm.219670.1                     | 9.2                                    | 8.2                                    | <b>-1.92</b>               | 0.00             |
| 1429096_at    | 2810455D13Rik | RIKEN cDNA 2810455D13 gene                                                                              | Mm.64974.1                      | 5.6                                    | 4.6                                    | <b>-1.92</b>               | 0.00             |
| 1433784_at    | Zfp871        | zinc finger protein 871                                                                                 | Mm.22459.1                      | 9.5                                    | 8.6                                    | <b>-1.92</b>               | 0.00             |
| 1433819_s_at  | Agpat3        | 1-acylglycerol-3-phosphate O-<br>acyltransferase 3                                                      | Mm.86311.1                      | 8.8                                    | 7.9                                    | <b>-1.92</b>               | 0.02             |
| 1435691_at    | Agphd1        | hydroxylysine kinase 1                                                                                  | Mm.123952.1                     | 10.0                                   | 9.1                                    | <b>-1.92</b>               | 0.02             |
| 1456533_at    | Dpy1911       | dpy-19-like 1 (C. elegans)                                                                              | Mm.191939.1                     | 8.0                                    | 7.0                                    | <b>-1.92</b>               | 0.01             |
| 1458125_at    |               |                                                                                                         | Mm.217603.1                     | 6.4                                    | 5.5                                    | <b>-1.92</b>               | 0.00             |
| 1458134_at    |               |                                                                                                         | Mm.212355.1                     | 7.1                                    | 6.1                                    | <b>-1.92</b>               | 0.00             |
| 1460256_at    | Car3          | carbonic anhydrase 3                                                                                    | Mm.300.1                        | 14.0                                   | 13.0                                   | <b>-1.92</b>               | 0.02             |
| 1421040_a_at  | Gsta2         | glutathione S-transferase, alpha 2<br>(Yc2)                                                             | Mm.197422.1                     | 9.9                                    | 9.0                                    | <b>-1.93</b>               | 0.05             |
| 1424858_at    | L2hgdh        | L-2-hydroxyglutarate dehydrogenase                                                                      | Mm.103362.1                     | 9.3                                    | 8.4                                    | <b>-1.93</b>               | 0.00             |
| 1427191_at    | Npr2          | natriuretic peptide receptor 2                                                                          | Mm.103477.1                     | 10.0                                   | 9.0                                    | <b>-1.93</b>               | 0.02             |
| 1427798_x_at  |               |                                                                                                         | Mm.214467.1                     | 5.6                                    | 4.7                                    | <b>-1.93</b>               | 0.03             |
| 1429166_s_at  | Clmn          | calmin                                                                                                  | Mm.38859.1                      | 8.4                                    | 7.5                                    | <b>-1.93</b>               | 0.00             |
| 1435781_at    | Cand1         | cullin associated and neddylation<br>disassociated 1                                                    | Mm.66300.1                      | 6.7                                    | 5.7                                    | <b>-1.93</b>               | 0.00             |
| 1441547_at    |               |                                                                                                         | Mm.89160.1                      | 7.0                                    | 6.1                                    | <b>-1.93</b>               | 0.02             |
| 1452333_at    | Smarca2       | SWI/SNF related, matrix associated,<br>actin dependent regulator of<br>chromatin, subfamily a, member 2 | Mm.12184.2                      | 8.5                                    | 7.5                                    | <b>-1.93</b>               | 0.00             |
| 1453186_at    | Sfrs18        | PNN interacting serine/arginine-rich                                                                    | Mm.100117.1                     | 7.2                                    | 6.3                                    | <b>-1.93</b>               | 0.01             |
| 1453319_at    | Ccar1         | cell division cycle and apoptosis<br>regulator 1                                                        | Mm.196371.1                     | 3.7                                    | 2.7                                    | <b>-1.93</b>               | 0.00             |
| 1424584_a_at  | Ranbp10       | RAN binding protein 10                                                                                  | Mm.4206.1                       | 10.1                                   | 9.1                                    | <b>-1.94</b>               | 0.04             |
| 1453692_at    | 4930581F22Rik | RIKEN cDNA 4930581F22 gene                                                                              | Mm.160157.1                     | 7.5                                    | 6.5                                    | <b>-1.94</b>               | 0.00             |
| 1455770_at    | Tdo2          | tryptophan 2,3-dioxygenase                                                                              | Mm.30146.1                      | 11.1                                   | 10.1                                   | <b>-1.94</b>               | 0.00             |
| 1438244_at    | Nfib          | nuclear factor I/B                                                                                      | Mm.4025.4                       | 7.0                                    | 6.1                                    | <b>-1.95</b>               | 0.00             |
| 1439590_at    | Xkr8          | X Kell blood group precursor related<br>family member 8 homolog                                         | Mm.44558.1                      | 5.9                                    | 4.9                                    | <b>-1.95</b>               | 0.01             |
| 1456822_at    | Rad23b        | RAD23b homolog (S. cerevisiae)                                                                          | Mm.210247.1                     | 5.2                                    | 4.2                                    | <b>-1.95</b>               | 0.01             |
| 1431175_at    | 1810019D21Rik | RIKEN cDNA 1810019D21 gene                                                                              | Mm.183003.1                     | 9.6                                    | 8.6                                    | <b>-1.96</b>               | 0.00             |
| 1433855_at    | Abat          | 4-aminobutyrate aminotransferase                                                                        | Mm.1348.2                       | 11.8                                   | 10.9                                   | <b>-1.96</b>               | 0.00             |
| 1434133_s_at  | Dcaf8         | DDB1 and CUL4 associated factor 8                                                                       | Mm.196080.1                     | 8.1                                    | 7.1                                    | <b>-1.96</b>               | 0.00             |
| 1416383_a_at  | Pcx           | pyruvate carboxylase                                                                                    | Mm.1845.1                       | 12.0                                   | 11.0                                   | <b>-1.97</b>               | 0.00             |
| 1423963_at    | Wdr26         | WD repeat domain 26                                                                                     | Mm.21126.1                      | 7.3                                    | 6.4                                    | <b>-1.97</b>               | 0.00             |
| 1435074_at    | Tmem106b      | transmembrane protein 106B                                                                              | Mm.27742.1                      | 12.1                                   | 11.1                                   | <b>-1.97</b>               | 0.00             |
| 1440799_s_at  | Farp2         | FERM, RhoGEF and pleckstrin<br>domain protein 2                                                         | Mm.200915.1                     | 7.3                                    | 6.4                                    | <b>-1.97</b>               | 0.00             |
| 1452914_at    | N4bp211       | NEDD4 binding protein 2-like 1                                                                          | Mm.220888.1                     | 9.3                                    | 8.3                                    | <b>-1.97</b>               | 0.02             |



**Supplemental Table 9. Significant differently expressed genes in 3bKI HCC samples**

| Affymetrix ID | Gene Symbol   | Description                                                               | Transcript ID<br>(Array Design) | 3aKO<br>avg<br>signal<br>log2<br>(n=4) | 3bKI<br>Avg<br>Signal<br>log2<br>(n=5) | Fold<br>Change<br>(linear) | ANOVA<br>p-value |
|---------------|---------------|---------------------------------------------------------------------------|---------------------------------|----------------------------------------|----------------------------------------|----------------------------|------------------|
| 1455901_at    | Chpt1         | choline phosphotransferase 1                                              | Mm.21754.4                      | 7.5                                    | 6.5                                    | <b>-1.97</b>               | 0.03             |
| 1459302_at    | A030007N12Rik | RIKEN cDNA A030007N12 gene                                                | Mm.207475.1                     | 4.5                                    | 3.5                                    | <b>-1.97</b>               | 0.00             |
| 1416178_a_at  | Plekhb1       | pleckstrin homology domain<br>containing, family B (evectins)<br>member 1 | Mm.26633.1                      | 9.6                                    | 8.6                                    | <b>-1.98</b>               | 0.02             |
| 1418013_at    | Cml1          | camello-like 1                                                            | Mm.13036.1                      | 11.2                                   | 10.2                                   | <b>-1.98</b>               | 0.02             |
| 1421456_at    | P2ry1         | purinergic receptor P2Y, G-protein<br>coupled 1                           | Mm.3556.1                       | 7.1                                    | 6.1                                    | <b>-1.98</b>               | 0.00             |
| 1427945_at    | Dpyd          | dihydropyrimidine dehydrogenase                                           | Mm.27907.1                      | 10.1                                   | 9.1                                    | <b>-1.98</b>               | 0.01             |
| 1439331_at    | 4932439E07Rik | RIKEN cDNA 4932439E07 gene                                                | Mm.43978.1                      | 6.1                                    | 5.1                                    | <b>-1.98</b>               | 0.01             |
| 1446675_at    | Adk           | adenosine kinase                                                          | Mm.221040.1                     | 7.5                                    | 6.5                                    | <b>-1.98</b>               | 0.00             |
| 1449316_at    | Cyp4f15       | cytochrome P450, family 4,<br>subfamily f, polypeptide 15                 | Mm.26539.1                      | 11.3                                   | 10.3                                   | <b>-1.98</b>               | 0.00             |
| 1449462_at    | Pbld2         | phenazine biosynthesis-like protein<br>domain containing 2                | Mm.24795.1                      | 10.2                                   | 9.2                                    | <b>-1.98</b>               | 0.01             |
| 1457279_at    | Gm17586       | predicted gene, 17586                                                     | Mm.139237.1                     | 6.2                                    | 5.2                                    | <b>-1.98</b>               | 0.01             |
| 1418519_at    | Aadat         | aminoadipate aminotransferase                                             | Mm.35020.1                      | 11.1                                   | 10.1                                   | <b>-1.99</b>               | 0.02             |
| 1419924_at    | Fnip1         | folliculin interacting protein 1                                          | Mm.203784.1                     | 6.5                                    | 5.5                                    | <b>-1.99</b>               | 0.01             |
| 1420772_a_at  | Tsc22d3       | TSC22 domain family, member 3                                             | Mm.22216.1                      | 9.7                                    | 8.7                                    | <b>-1.99</b>               | 0.01             |
| 1428111_at    | Slc38a4       | solute carrier family 38, member 4                                        | Mm.22260.1                      | 11.4                                   | 10.4                                   | <b>-1.99</b>               | 0.00             |
| 1442593_at    |               |                                                                           | Mm.103073.1                     | 7.2                                    | 6.2                                    | <b>-1.99</b>               | 0.00             |
| 1443516_at    | Atxn2         | ataxin 2                                                                  | Mm.152851.1                     | 7.4                                    | 6.4                                    | <b>-1.99</b>               | 0.00             |
| 1418649_at    | Egln3         | egl-9 family hypoxia-inducible factor<br>3                                | Mm.33484.1                      | 8.1                                    | 7.1                                    | <b>-2</b>                  | 0.03             |
| 1424973_at    | Cyp3a25       | cytochrome P450, family 3,<br>subfamily a, polypeptide 25                 | Mm.26993.1                      | 13.2                                   | 12.2                                   | <b>-2</b>                  | 0.01             |
| 1427410_at    | Dleu2         | deleted in lymphocytic leukemia, 2                                        | Mm.25679.1                      | 8.0                                    | 7.0                                    | <b>-2</b>                  | 0.04             |
| 1443075_at    |               |                                                                           | Mm.218689.1                     | 4.7                                    | 3.7                                    | <b>-2</b>                  | 0.01             |
| 1431032_at    | Agl           | amylo-1,6-glucosidase, 4-alpha-<br>glucanotransferase                     | Mm.17221.1                      | 8.7                                    | 7.7                                    | <b>-2.01</b>               | 0.00             |
| 1432916_at    | 5730407I07Rik | RIKEN cDNA 5730407I07 gene                                                | Mm.158393.1                     | 5.3                                    | 4.3                                    | <b>-2.01</b>               | 0.00             |
| 1452989_at    | 2900009J20Rik |                                                                           | Mm.82240.1                      | 6.9                                    | 5.9                                    | <b>-2.01</b>               | 0.00             |
| 1435292_at    | Tbc1d4        | TBC1 domain family, member 4                                              | Mm.27439.1                      | 6.0                                    | 5.0                                    | <b>-2.02</b>               | 0.00             |
| 1443056_at    |               |                                                                           | Mm.167541.1                     | 7.2                                    | 6.2                                    | <b>-2.02</b>               | 0.00             |
| 1428981_at    | 2810007J24Rik | RIKEN cDNA 2810007J24 gene                                                | Mm.30070.1                      | 12.8                                   | 11.8                                   | <b>-2.03</b>               | 0.00             |
| 1439483_at    | AI506816      | expressed sequence AI506816                                               | Mm.5399.1                       | 7.4                                    | 6.4                                    | <b>-2.03</b>               | 0.00             |
| 1440965_at    | Pigl          | phosphatidylinositol glycan anchor<br>biosynthesis, class L               | Mm.37323.1                      | 8.0                                    | 6.9                                    | <b>-2.03</b>               | 0.02             |
| 1435163_at    | Zfp871        | zinc finger protein 871                                                   | Mm.27433.1                      | 7.7                                    | 6.7                                    | <b>-2.04</b>               | 0.00             |
| 1447018_at    | Gm12971       | predicted gene 12971                                                      | Mm.182794.1                     | 6.1                                    | 5.0                                    | <b>-2.04</b>               | 0.00             |
| 1452828_at    | Fbxo21        | F-box protein 21                                                          | Mm.21912.1                      | 10.0                                   | 9.0                                    | <b>-2.04</b>               | 0.02             |
| 1454033_at    | Pdilt         | protein disulfide isomerase-like,<br>testis expressed                     | Mm.84631.1                      | 5.7                                    | 4.7                                    | <b>-2.04</b>               | 0.03             |
| 1455418_at    |               |                                                                           | Mm.138292.1                     | 8.4                                    | 7.4                                    | <b>-2.04</b>               | 0.00             |
| 1456599_at    | Nxt2          | nuclear transport factor 2-like export<br>factor 2                        | Mm.41899.1                      | 6.8                                    | 5.8                                    | <b>-2.04</b>               | 0.01             |
| 1457817_at    |               |                                                                           | Mm.86731.1                      | 3.8                                    | 2.8                                    | <b>-2.04</b>               | 0.00             |

**Supplemental Table 9. Significant differently expressed genes in 3bKI HCC samples**

| Affymetrix ID | Gene Symbol   | Description                                                                | Transcript ID<br>(Array Design) | 3aKO<br>avg<br>signal<br>log2<br>(n=4) | 3bKI<br>Avg<br>Signal<br>log2<br>(n=5) | Fold<br>Change<br>(linear) | ANOVA<br>p-value |
|---------------|---------------|----------------------------------------------------------------------------|---------------------------------|----------------------------------------|----------------------------------------|----------------------------|------------------|
| 1416946_a_at  | Acaa1a        | acetyl-Coenzyme A acyltransferase 1A; acetyl-Coenzyme A acyltransferase 1B | Mm.205266.1                     | 12.2                                   | 11.2                                   | <b>-2.05</b>               | 0.03             |
| 1419407_at    | Hc            | hemolytic complement                                                       | Mm.2168.1                       | 12.0                                   | 11.0                                   | <b>-2.05</b>               | 0.02             |
| 1425281_a_at  | Tsc22d3       | TSC22 domain family, member 3                                              | Mm.22216.2                      | 9.4                                    | 8.4                                    | <b>-2.05</b>               | 0.01             |
| 1430177_at    | Ube2b         | ubiquitin-conjugating enzyme E2B                                           | Mm.158142.1                     | 6.6                                    | 5.5                                    | <b>-2.05</b>               | 0.00             |
| 1443353_at    |               |                                                                            | Mm.207472.1                     | 7.2                                    | 6.2                                    | <b>-2.05</b>               | 0.00             |
| 1445574_at    |               |                                                                            | Mm.25466.1                      | 7.1                                    | 6.1                                    | <b>-2.05</b>               | 0.00             |
| 1449040_a_at  | Sephs2        | selenophosphate synthetase 2                                               | Mm.20294.1                      | 12.4                                   | 11.4                                   | <b>-2.05</b>               | 0.00             |
| 1454617_at    | Arrdc3        | arrestin domain containing 3                                               | Mm.34385.1                      | 9.8                                    | 8.8                                    | <b>-2.05</b>               | 0.04             |
| 1457732_at    |               |                                                                            | Mm.36913.1                      | 4.9                                    | 3.8                                    | <b>-2.05</b>               | 0.00             |
| 1425981_a_at  | Rbl2          | retinoblastoma-like 2                                                      | Mm.28027.2                      | 9.0                                    | 7.9                                    | <b>-2.06</b>               | 0.00             |
| 1426782_at    | Gpr125        | G protein-coupled receptor 125                                             | Mm.18062.1                      | 9.3                                    | 8.3                                    | <b>-2.06</b>               | 0.00             |
| 1431033_x_at  | Agl           | amylo-1,6-glucosidase, 4-alpha-glucanotransferase                          | Mm.17221.1                      | 8.7                                    | 7.6                                    | <b>-2.06</b>               | 0.00             |
| 1443923_at    | Akap13        | A kinase (PRKA) anchor protein 13                                          | Mm.142922.1                     | 7.0                                    | 6.0                                    | <b>-2.06</b>               | 0.00             |
| 1420656_at    | Abcg8         | ATP-binding cassette, sub-family G (WHITE), member 8                       | Mm.26581.1                      | 9.6                                    | 8.5                                    | <b>-2.07</b>               | 0.03             |
| 1424451_at    | Acaa1b        | acetyl-Coenzyme A acyltransferase 1B                                       | Mm.205266.2                     | 13.9                                   | 12.8                                   | <b>-2.07</b>               | 0.02             |
| 1436276_at    |               |                                                                            | Mm.102310.1                     | 6.4                                    | 5.3                                    | <b>-2.07</b>               | 0.00             |
| 1445676_at    |               |                                                                            | Mm.156700.1                     | 5.6                                    | 4.6                                    | <b>-2.07</b>               | 0.01             |
| 1449375_at    | Ces2a         | carboxylesterase 2A                                                        | Mm.212983.1                     | 12.3                                   | 11.2                                   | <b>-2.07</b>               | 0.02             |
| 1456257_at    | Fam126b       | family with sequence similarity 126, member B                              | Mm.26272.1                      | 8.0                                    | 7.0                                    | <b>-2.07</b>               | 0.00             |
| 1416947_s_at  | Acaa1a        | acetyl-Coenzyme A acyltransferase 1A; acetyl-Coenzyme A acyltransferase 1B | Mm.205266.1                     | 13.9                                   | 12.8                                   | <b>-2.08</b>               | 0.01             |
| 1441789_at    |               |                                                                            | Mm.164973.1                     | 4.1                                    | 3.0                                    | <b>-2.08</b>               | 0.00             |
| 1443137_at    |               |                                                                            | Mm.187830.1                     | 4.8                                    | 3.7                                    | <b>-2.08</b>               | 0.02             |
| 1457263_at    |               |                                                                            | Mm.27508.1                      | 12.3                                   | 11.2                                   | <b>-2.08</b>               | 0.00             |
| 1427411_s_at  | Dleu2         | deleted in lymphocytic leukemia, 2                                         | Mm.25679.1                      | 7.1                                    | 6.1                                    | <b>-2.1</b>                | 0.05             |
| 1435333_at    | Ndufaf4       | NADH dehydrogenase (ubiquinone) 1 alpha subcomplex, assembly factor 4      | Mm.28983.2                      | 8.8                                    | 7.8                                    | <b>-2.1</b>                | 0.01             |
| 1444622_at    |               |                                                                            | Mm.202462.1                     | 5.8                                    | 4.7                                    | <b>-2.1</b>                | 0.03             |
| 1452889_at    | Lhpp          | phospholysine phosphohistidine inorganic pyrophosphate phosphatase         | Mm.18775.1                      | 10.0                                   | 8.9                                    | <b>-2.1</b>                | 0.03             |
| 1416738_at    | Brap          | BRCA1 associated protein                                                   | Mm.153372.1                     | 9.8                                    | 8.7                                    | <b>-2.11</b>               | 0.01             |
| 1429510_at    | 2810410L24Rik | RIKEN cDNA 2810410L24 gene                                                 | Mm.51309.1                      | 6.6                                    | 5.5                                    | <b>-2.11</b>               | 0.01             |
| 1433944_at    | Hectd2        | HECT domain containing 2                                                   | Mm.61107.1                      | 3.9                                    | 2.9                                    | <b>-2.11</b>               | 0.02             |
| 1434390_at    | AI503316      | expressed sequence AI503316; heterogeneous nuclear ribonucleoprotein U     | Mm.28927.2                      | 8.0                                    | 6.9                                    | <b>-2.11</b>               | 0.00             |
| 1455918_at    | Adrb3         | adrenergic receptor, beta 3                                                | Mm.212992.1                     | 5.8                                    | 4.7                                    | <b>-2.11</b>               | 0.02             |
| 1442349_at    | Agphd1        | hydroxylysine kinase 1                                                     | Mm.216628.1                     | 7.5                                    | 6.4                                    | <b>-2.12</b>               | 0.01             |

**Supplemental Table 9. Significant differently expressed genes in 3bKI HCC samples**

| Affymetrix ID | Gene Symbol   | Description                                                                                            | Transcript ID<br>(Array Design) | 3aKO<br>avg<br>signal<br>log2<br>(n=4) | 3bKI<br>Avg<br>Signal<br>log2<br>(n=5) | Fold<br>Change<br>(linear) | ANOVA<br>p-value |
|---------------|---------------|--------------------------------------------------------------------------------------------------------|---------------------------------|----------------------------------------|----------------------------------------|----------------------------|------------------|
| 1459274_at    | Gpr135        | G protein-coupled receptor 135                                                                         | Mm.214523.1                     | 5.0                                    | 3.9                                    | <b>-2.12</b>               | 0.04             |
| 1459804_at    | Crebbp        | CREB binding protein                                                                                   | Mm.132238.1                     | 5.3                                    | 4.3                                    | <b>-2.12</b>               | 0.00             |
| 1421041_s_at  | Gm3776        | predicted gene 3776; glutathione S-transferase, alpha 1 (Ya); glutathione S-transferase, alpha 2 (Yc2) | Mm.197422.1                     | 9.8                                    | 8.7                                    | <b>-2.13</b>               | 0.04             |
| 1417532_at    | Cyp2j5        | cytochrome P450, family 2, subfamily j, polypeptide 5                                                  | Mm.12838.1                      | 10.3                                   | 9.2                                    | <b>-2.14</b>               | 0.00             |
| 1419687_at    | Macrod1       | MACRO domain containing 1                                                                              | Mm.38346.1                      | 10.0                                   | 8.9                                    | <b>-2.14</b>               | 0.00             |
| 1425631_at    | Ppp1r3c       | protein phosphatase 1, regulatory (inhibitor) subunit 3C                                               | Mm.24724.1                      | 8.4                                    | 7.3                                    | <b>-2.14</b>               | 0.01             |
| 1427177_at    | Fyco1         | FYVE and coiled-coil domain containing 1                                                               | Mm.204793.1                     | 8.7                                    | 7.6                                    | <b>-2.14</b>               | 0.00             |
| 1427982_s_at  | Syne2         | spectrin repeat containing, nuclear envelope 2                                                         | Mm.26652.1                      | 6.8                                    | 5.7                                    | <b>-2.14</b>               | 0.00             |
| 1422135_at    | Zfp146        | zinc finger protein OZF-like                                                                           | Mm.42054.1                      | 5.5                                    | 4.4                                    | <b>-2.15</b>               | 0.00             |
| 1445065_at    |               |                                                                                                        | Mm.217125.1                     | 6.3                                    | 5.2                                    | <b>-2.15</b>               | 0.00             |
| 1426243_at    | Cth           | cystathionase (cystathionine gamma-lyase)                                                              | Mm.28301.1                      | 11.9                                   | 10.8                                   | <b>-2.16</b>               | 0.01             |
| 1427974_s_at  | Cacna1d       | calcium channel, voltage-dependent, L type, alpha 1D subunit                                           | Mm.9772.1                       | 6.0                                    | 4.9                                    | <b>-2.16</b>               | 0.00             |
| 1438130_at    | Taf15         | TAF15 RNA polymerase II, TATA box binding protein (TBP)-associated factor                              | Mm.144060.1                     | 5.8                                    | 4.7                                    | <b>-2.16</b>               | 0.00             |
| 1451156_s_at  | Vldlr         | very low density lipoprotein receptor                                                                  | Mm.4141.2                       | 5.4                                    | 4.3                                    | <b>-2.16</b>               | 0.01             |
| 1451373_at    | Ugt3a1        | UDP glycosyltransferases 3 family, polypeptide A1                                                      | Mm.201628.1                     | 10.7                                   | 9.6                                    | <b>-2.16</b>               | 0.01             |
| 1434906_at    | 0610005C13Rik | RIKEN cDNA 0610005C13 gene                                                                             | Mm.200459.1                     | 11.3                                   | 10.2                                   | <b>-2.17</b>               | 0.00             |
| 1458208_s_at  | Mccc1         | methylcrotonoyl-Coenzyme A carboxylase 1 (alpha)                                                       | Mm.211374.1                     | 6.1                                    | 5.0                                    | <b>-2.17</b>               | 0.02             |
| 1418146_a_at  | Rbl2          | retinoblastoma-like 2                                                                                  | Mm.28027.1                      | 8.2                                    | 7.1                                    | <b>-2.18</b>               | 0.00             |
| 1450643_s_at  | Acsl1         | acyl-CoA synthetase long-chain family member 1                                                         | Mm.28962.1                      | 12.4                                   | 11.2                                   | <b>-2.18</b>               | 0.00             |
| 1447227_at    |               |                                                                                                        | Mm.89658.1                      | 7.8                                    | 6.6                                    | <b>-2.2</b>                | 0.03             |
| 1419946_s_at  | Rab2a         | RAB2A, member RAS oncogene family                                                                      | Mm.206835.1                     | 6.3                                    | 5.2                                    | <b>-2.21</b>               | 0.00             |
| 1436317_at    | Pgap1         | post-GPI attachment to proteins 1                                                                      | Mm.103539.1                     | 7.4                                    | 6.3                                    | <b>-2.21</b>               | 0.00             |
| 1430893_at    | Mup10         | major urinary protein 10                                                                               | Mm.196051.1                     | 12.2                                   | 11.1                                   | <b>-2.22</b>               | 0.03             |
| 1431805_a_at  | Rhpn2         | rhopilin, Rho GTPase binding protein 2                                                                 | Mm.35465.1                      | 6.5                                    | 5.3                                    | <b>-2.22</b>               | 0.00             |
| 1443053_at    |               |                                                                                                        | Mm.136244.1                     | 5.0                                    | 3.9                                    | <b>-2.22</b>               | 0.02             |
| 1448499_a_at  | Ephx2         | epoxide hydrolase 2, cytoplasmic                                                                       | Mm.15295.1                      | 12.5                                   | 11.3                                   | <b>-2.22</b>               | 0.03             |
| 1453487_at    | Dhdh          | dihydrodiol dehydrogenase (dimeric)                                                                    | Mm.34208.1                      | 8.8                                    | 7.7                                    | <b>-2.22</b>               | 0.00             |
| 1421183_at    | Tex12         | testis expressed gene 12                                                                               | Mm.78133.1                      | 6.5                                    | 5.4                                    | <b>-2.24</b>               | 0.00             |
| 1424182_at    | Acat1         | acetyl-Coenzyme A acetyltransferase 1                                                                  | Mm.219649.1                     | 10.4                                   | 9.2                                    | <b>-2.25</b>               | 0.03             |

**Supplemental Table 9. Significant differently expressed genes in 3bKI HCC samples**

| Affymetrix ID | Gene Symbol   | Description                                                                    | Transcript ID<br>(Array Design) | 3aKO<br>avg<br>signal<br>log2<br>(n=4) | 3bKI<br>Avg<br>Signal<br>log2<br>(n=5) | Fold<br>Change<br>(linear) | ANOVA<br>p-value |
|---------------|---------------|--------------------------------------------------------------------------------|---------------------------------|----------------------------------------|----------------------------------------|----------------------------|------------------|
| 1424493_s_at  | Ugt3a1        | UDP glycosyltransferases 3 family, polypeptide A1                              | Mm.201628.1                     | 10.3                                   | 9.2                                    | <b>-2.25</b>               | 0.01             |
| 1424657_at    | Taok1         | TAO kinase 1                                                                   | Mm.24585.1                      | 9.1                                    | 8.0                                    | <b>-2.25</b>               | 0.00             |
| 1438596_at    | 1500017E21Rik | RIKEN cDNA 1500017E21 gene                                                     | Mm.61107.2                      | 4.0                                    | 2.9                                    | <b>-2.25</b>               | 0.02             |
| 1422565_s_at  | Nfic          | nuclear factor I/C                                                             | Mm.5104.1                       | 7.0                                    | 5.8                                    | <b>-2.27</b>               | 0.00             |
| 1433691_at    | Ppp1r3c       | protein phosphatase 1, regulatory (inhibitor) subunit 3C                       | Mm.24724.2                      | 10.7                                   | 9.5                                    | <b>-2.28</b>               | 0.01             |
| 1435446_a_at  | Chpt1         | choline phosphotransferase 1                                                   | Mm.21754.3                      | 10.6                                   | 9.4                                    | <b>-2.28</b>               | 0.02             |
| 1419510_at    | Ces1e         | carboxylesterase 1E                                                            | Mm.63490.1                      | 10.2                                   | 9.0                                    | <b>-2.29</b>               | 0.03             |
| 1419906_at    | Hpgd          | hydroxyprostaglandin dehydrogenase 15 (NAD)                                    | Mm.199536.1                     | 8.8                                    | 7.6                                    | <b>-2.3</b>                | 0.02             |
| 1436555_at    | Slc7a2        | solute carrier family 7 (cationic amino acid transporter, y+ system), member 2 | Mm.16796.1                      | 11.6                                   | 10.4                                   | <b>-2.3</b>                | 0.00             |
| 1418051_at    | Ephb6         | Eph receptor B6                                                                | Mm.1480.1                       | 5.6                                    | 4.4                                    | <b>-2.31</b>               | 0.00             |
| 1448491_at    | Ech1          | enoyl coenzyme A hydratase 1, peroxisomal                                      | Mm.2112.1                       | 12.7                                   | 11.5                                   | <b>-2.31</b>               | 0.03             |
| 1449298_a_at  | Pde1a         | phosphodiesterase 1A, calmodulin-dependent                                     | Mm.40678.1                      | 6.6                                    | 5.3                                    | <b>-2.31</b>               | 0.03             |
| 1418697_at    | Inmt          | indolethylamine N-methyltransferase                                            | Mm.299.1                        | 12.8                                   | 11.5                                   | <b>-2.33</b>               | 0.02             |
| 1422526_at    | Acs11         | acyl-CoA synthetase long-chain family member 1                                 | Mm.28962.1                      | 12.0                                   | 10.8                                   | <b>-2.33</b>               | 0.00             |
| 1435349_at    | Nrp2          | neuropilin 2                                                                   | Mm.37629.1                      | 8.4                                    | 7.1                                    | <b>-2.33</b>               | 0.00             |
| 1441498_at    |               |                                                                                | Mm.102808.1                     | 7.0                                    | 5.8                                    | <b>-2.34</b>               | 0.00             |
| 1445188_at    |               |                                                                                | Mm.173907.1                     | 3.4                                    | 2.2                                    | <b>-2.34</b>               | 0.00             |
| 1458007_at    | Myo1b         | myosin IB                                                                      | Mm.93416.1                      | 4.9                                    | 3.6                                    | <b>-2.35</b>               | 0.00             |
| 1427285_s_at  | Malat1        | metastasis associated lung adenocarcinoma transcript 1 (non-coding RNA)        | Mm.220932.1                     | 8.1                                    | 6.9                                    | <b>-2.37</b>               | 0.00             |
| 1457284_at    |               |                                                                                | Mm.45553.1                      | 5.0                                    | 3.7                                    | <b>-2.37</b>               | 0.00             |
| 1428832_at    | 1600002H07Rik | RIKEN cDNA 1600002H07 gene                                                     | Mm.23881.1                      | 8.7                                    | 7.5                                    | <b>-2.38</b>               | 0.03             |
| 1446742_at    |               |                                                                                | Mm.209315.1                     | 4.0                                    | 2.8                                    | <b>-2.38</b>               | 0.00             |
| 1417629_at    | Prodh         | proline dehydrogenase                                                          | Mm.28456.1                      | 11.2                                   | 9.9                                    | <b>-2.39</b>               | 0.02             |
| 1457554_at    | Apob          | apolipoprotein B                                                               | Mm.214778.1                     | 11.5                                   | 10.3                                   | <b>-2.39</b>               | 0.00             |
| 1427371_at    | Abca8a        | ATP-binding cassette, sub-family A (ABC1), member 8a                           | Mm.138955.1                     | 10.9                                   | 9.6                                    | <b>-2.41</b>               | 0.00             |
| 1446797_at    | A330075M08Rik | RIKEN cDNA A330075M08 gene                                                     | Mm.210056.1                     | 4.6                                    | 3.3                                    | <b>-2.41</b>               | 0.00             |
| 1455454_at    | Akr1c19       | aldo-keto reductase family 1, member C19                                       | Mm.22832.1                      | 8.5                                    | 7.2                                    | <b>-2.42</b>               | 0.01             |
| 1428636_at    | Steap2        | six transmembrane epithelial antigen of prostate 2                             | Mm.41944.1                      | 6.1                                    | 4.9                                    | <b>-2.43</b>               | 0.00             |
| 1434465_x_at  | Vldlr         | very low density lipoprotein receptor                                          | Mm.4141.3                       | 8.1                                    | 6.8                                    | <b>-2.43</b>               | 0.03             |
| 1439920_at    |               |                                                                                | Mm.174409.1                     | 5.6                                    | 4.4                                    | <b>-2.44</b>               | 0.00             |
| 1445506_at    | Abhd15        | abhydrolase domain containing 15                                               | Mm.122731.1                     | 4.5                                    | 3.3                                    | <b>-2.45</b>               | 0.00             |
| 1457150_at    | AI428301      | expressed sequence AI428301                                                    | Mm.31702.1                      | 5.6                                    | 4.3                                    | <b>-2.45</b>               | 0.00             |

**Supplemental Table 9. Significant differently expressed genes in 3bKI HCC samples**

| Affymetrix ID | Gene Symbol   | Description                                                                     | Transcript ID<br>(Array Design) | 3aKO<br>avg<br>signal<br>log2<br>(n=4) | 3bKI<br>Avg<br>Signal<br>log2<br>(n=5) | Fold<br>Change<br>(linear) | ANOVA<br>p-value |
|---------------|---------------|---------------------------------------------------------------------------------|---------------------------------|----------------------------------------|----------------------------------------|----------------------------|------------------|
| 1457262_at    | Smg1          | SMG1 homolog, phosphatidylinositol 3-kinase-related kinase (C. elegans)         | Mm.110251.1                     | 7.2                                    | 5.9                                    | <b>-2.45</b>               | 0.00             |
| 1431916_at    | Hsd3b3        | hydroxy-delta-5-steroid dehydrogenase, 3 beta- and steroid delta-isomerase 3    | Mm.158717.1                     | 9.6                                    | 8.3                                    | <b>-2.46</b>               | 0.02             |
| 1449001_at    | Ivd           | isovaleryl coenzyme A dehydrogenase                                             | Mm.6635.1                       | 10.1                                   | 8.8                                    | <b>-2.47</b>               | 0.00             |
| 1419144_at    | Cd163         | CD163 antigen                                                                   | Mm.30679.1                      | 6.4                                    | 5.0                                    | <b>-2.48</b>               | 0.02             |
| 1424608_a_at  | Bzw2          | basic leucine zipper and W2 domains 2; predicted gene 4354; predicted gene 5589 | Mm.182434.2                     | 8.6                                    | 7.2                                    | <b>-2.51</b>               | 0.02             |
| 1440351_at    |               |                                                                                 | Mm.102770.1                     | 6.2                                    | 4.9                                    | <b>-2.51</b>               | 0.00             |
| 1455457_at    | Cyp2c54       | cytochrome P450, family 2, subfamily c, polypeptide 54                          | Mm.220317.2                     | 12.2                                   | 10.8                                   | <b>-2.51</b>               | 0.04             |
| 1426146_a_at  | Chpt1         | choline phosphotransferase 1                                                    | Mm.21754.1                      | 9.8                                    | 8.5                                    | <b>-2.52</b>               | 0.02             |
| 1431833_a_at  | Hmgcs2        | 3-hydroxy-3-methylglutaryl-Coenzyme A synthase 2                                | Mm.10633.2                      | 12.4                                   | 11.1                                   | <b>-2.53</b>               | 0.03             |
| 1452913_at    | Pcp411        | Purkinje cell protein 4-like 1                                                  | Mm.28040.1                      | 7.7                                    | 6.3                                    | <b>-2.53</b>               | 0.01             |
| 1455267_at    | Esrrg         | estrogen-related receptor gamma                                                 | Mm.23206.1                      | 7.1                                    | 5.8                                    | <b>-2.55</b>               | 0.05             |
| 1435870_at    | Chpt1         | choline phosphotransferase 1                                                    | Mm.148209.2                     | 8.1                                    | 6.8                                    | <b>-2.57</b>               | 0.01             |
| 1428663_at    | Sgms2         | sphingomyelin synthase 2                                                        | Mm.35676.1                      | 9.2                                    | 7.8                                    | <b>-2.59</b>               | 0.01             |
| 1457915_at    | Mettl20       | methyltransferase like 20                                                       | Mm.66631.1                      | 7.1                                    | 5.7                                    | <b>-2.61</b>               | 0.02             |
| 1455593_at    | Apob          | apolipoprotein B                                                                | Mm.29123.1                      | 13.1                                   | 11.7                                   | <b>-2.64</b>               | 0.00             |
| 1423867_at    | Serpina3k     | serine (or cysteine) peptidase inhibitor, clade A, member 3K                    | Mm.196242.1                     | 11.4                                   | 10.0                                   | <b>-2.65</b>               | 0.00             |
| 1440624_at    |               |                                                                                 | Mm.214662.1                     | 5.6                                    | 4.2                                    | <b>-2.71</b>               | 0.00             |
| 1456048_at    | Cpeb3         | cytoplasmic polyadenylation element binding protein 3                           | Mm.203968.4                     | 6.8                                    | 5.4                                    | <b>-2.72</b>               | 0.00             |
| 1421212_at    | Abcc6         | ATP-binding cassette, sub-family C (CFTR/MRP), member 6                         | Mm.63514.1                      | 10.2                                   | 8.7                                    | <b>-2.75</b>               | 0.00             |
| 1456120_at    | Secisbp2l     | SECIS binding protein 2-like                                                    | Mm.183116.2                     | 7.9                                    | 6.4                                    | <b>-2.78</b>               | 0.00             |
| 1450703_at    | Slc7a2        | solute carrier family 7 (cationic amino acid transporter, y+ system), member 2  | Mm.4676.1                       | 7.8                                    | 6.3                                    | <b>-2.81</b>               | 0.00             |
| 1437798_at    | 6720422M22Rik | RIKEN cDNA 6720422M22 gene                                                      | Mm.23277.1                      | 4.9                                    | 3.4                                    | <b>-2.89</b>               | 0.04             |
| 1453220_at    | Nxpe2         | neurexophilin and PC-esterase domain family, member 2                           | Mm.31626.1                      | 7.4                                    | 5.9                                    | <b>-2.9</b>                | 0.03             |
| 1438258_at    | Vldlr         | very low density lipoprotein receptor                                           | Mm.38836.1                      | 7.1                                    | 5.6                                    | <b>-2.91</b>               | 0.01             |
| 1427202_at    | Mettl20       | methyltransferase like 20                                                       | Mm.1043.1                       | 9.4                                    | 7.8                                    | <b>-2.92</b>               | 0.01             |
| 1431817_at    | Adh6-ps1      | alcohol dehydrogenase 6 (class V), pseudogene 1                                 | Mm.158750.1                     | 5.2                                    | 3.7                                    | <b>-2.94</b>               | 0.02             |
| 1429809_at    | Tmtc2         | transmembrane and tetratricopeptide repeat containing 2                         | Mm.37266.1                      | 6.5                                    | 4.9                                    | <b>-2.96</b>               | 0.00             |
| 1452569_at    | Slco1b2       | solute carrier organic anion transporter family, member 1b2                     | Mm.24074.2                      | 7.3                                    | 5.7                                    | <b>-3.03</b>               | 0.00             |
| 1435893_at    | Vldlr         | very low density lipoprotein receptor                                           | Mm.32795.1                      | 7.0                                    | 5.4                                    | <b>-3.08</b>               | 0.01             |

**Supplemental Table 9. Significant differently expressed genes in 3bKI HCC samples**

| Affymetrix ID | Gene Symbol   | Description                                                     | Transcript ID<br>(Array Design) | 3aKO<br>avg<br>signal<br>log2<br>(n=4) | 3bKI<br>Avg<br>Signal<br>log2<br>(n=5) | Fold<br>Change<br>(linear) | ANOVA<br>p-value |
|---------------|---------------|-----------------------------------------------------------------|---------------------------------|----------------------------------------|----------------------------------------|----------------------------|------------------|
| 1457156_at    | Trhde         | TRH-degrading enzyme                                            | Mm.131457.1                     | 4.4                                    | 2.8                                    | <b>-3.12</b>               | 0.03             |
| 1428988_at    | Abcc3         | ATP-binding cassette, sub-family C<br>(CFTR/MRP), member 3      | Mm.23942.1                      | 10.4                                   | 8.7                                    | <b>-3.14</b>               | 0.01             |
| 1427797_s_at  | Ctse          | cathepsin E                                                     | Mm.214467.1                     | 9.4                                    | 7.7                                    | <b>-3.15</b>               | 0.01             |
| 1416147_at    | Hspa4         | heat shock protein 4                                            | Mm.1032.1                       | 8.2                                    | 6.6                                    | <b>-3.17</b>               | 0.00             |
| 1424159_at    | Fam134c       | family with sequence similarity 134,<br>member C                | Mm.33881.1                      | 9.2                                    | 7.4                                    | <b>-3.34</b>               | 0.00             |
| 1444552_at    |               |                                                                 | Mm.218148.1                     | 6.7                                    | 4.9                                    | <b>-3.47</b>               | 0.00             |
| 1417900_a_at  | Vldlr         | very low density lipoprotein receptor                           | Mm.4141.1                       | 7.6                                    | 5.7                                    | <b>-3.64</b>               | 0.02             |
| 1429822_at    | 4633401B06Rik | RIKEN cDNA 4633401B06 gene                                      | Mm.178280.1                     | 8.2                                    | 6.3                                    | <b>-3.66</b>               | 0.03             |
| 1416452_at    | Oat           | ornithine aminotransferase                                      | Mm.13694.1                      | 13.5                                   | 11.6                                   | <b>-3.81</b>               | 0.01             |
| 1444691_at    | Prkd3         | protein kinase D3                                               | Mm.211715.1                     | 6.2                                    | 4.3                                    | <b>-3.82</b>               | 0.01             |
| 1441430_at    |               |                                                                 | Mm.44625.1                      | 7.3                                    | 5.3                                    | <b>-3.83</b>               | 0.00             |
| 1437213_at    | Nudt21        | nudix (nucleoside diphosphate linked<br>moiety X)-type motif 21 | Mm.35006.2                      | 7.7                                    | 5.7                                    | <b>-3.87</b>               | 0.00             |
| 1451787_at    | Cyp2b10       | cytochrome P450, family 2,<br>subfamily b, polypeptide 10       | Mm.14177.1                      | 8.9                                    | 6.9                                    | <b>-3.9</b>                | 0.01             |
| 1424715_at    | Retsat        | retinol saturase (all trans retinol<br>13,14 reductase)         | Mm.27506.1                      | 12.7                                   | 10.6                                   | <b>-4.1</b>                | 0.02             |
| 1455966_s_at  | Nudt21        | nudix (nucleoside diphosphate linked<br>moiety X)-type motif 21 | Mm.35006.2                      | 8.6                                    | 6.5                                    | <b>-4.31</b>               | 0.00             |
| 1460258_at    | Lect1         | leukocyte cell derived chemotaxin 1                             | Mm.46561.1                      | 7.5                                    | 5.2                                    | <b>-4.77</b>               | 0.00             |
| 1424716_at    | Retsat        | retinol saturase (all trans retinol<br>13,14 reductase)         | Mm.27506.1                      | 10.5                                   | 8.3                                    | <b>-4.8</b>                | 0.03             |
| 1459253_at    | 1700023H06Rik | RIKEN cDNA 1700023H06 gene                                      | Mm.103191.1                     | 6.7                                    | 4.5                                    | <b>-4.85</b>               | 0.02             |
| 1428223_at    | Mfsd2a        | major facilitator superfamily domain<br>containing 2A           | Mm.38305.1                      | 9.9                                    | 7.6                                    | <b>-4.87</b>               | 0.04             |
| 1449065_at    | Acot1         | acyl-CoA thioesterase 1                                         | Mm.1978.1                       | 8.0                                    | 5.6                                    | <b>-5.11</b>               | 0.04             |
| 1431406_at    | Agxt2l1       | ethanolamine phosphate<br>phospholyase                          | Mm.219551.1                     | 6.3                                    | 3.9                                    | <b>-5.27</b>               | 0.01             |
| 1452730_at    | Rps4y2        | ribosomal protein S4-like                                       | Mm.3572.1                       | 7.9                                    | 5.3                                    | <b>-5.83</b>               | 0.05             |
| 1452975_at    | Agxt2l1       | ethanolamine phosphate<br>phospholyase                          | Mm.29125.1                      | 10.9                                   | 8.3                                    | <b>-5.9</b>                | 0.00             |
| 1453588_at    | Car3          | carbonic anhydrase 3                                            | Mm.160284.1                     | 6.0                                    | 3.0                                    | <b>-7.97</b>               | 0.03             |
| 1425645_s_at  | Cyp2b10       | cytochrome P450, family 2,<br>subfamily b, polypeptide 10       | Mm.14177.1                      | 9.0                                    | 5.9                                    | <b>-8.72</b>               | 0.00             |
| 1422257_s_at  | Cyp2b10       | cytochrome P450, family 2,<br>subfamily b, polypeptide 10       | Mm.218749.1                     | 8.6                                    | 5.3                                    | <b>-9.85</b>               | 0.00             |
| 1460606_at    | Hsd17b13      | hydroxysteroid (17-beta)<br>dehydrogenase 13                    | Mm.220914.1                     | 10.1                                   | 6.7                                    | <b>-10.58</b>              | 0.04             |
| 1430584_s_at  | Car3          | carbonic anhydrase 3                                            | Mm.160284.1                     | 10.8                                   | 7.1                                    | <b>-12.58</b>              | 0.02             |

## Supplemental Table 10. General IPA functions for genes altered in 1KI or 3bKI tumors

| Category | Group           | B-H p-value | Genes                                                                                                                                                                                                                                                                                                                                                                                                                                                                                                                                                                                                                                                                                                                                                                                                                                                                                                                                                                                                                                                                                                                                                                                                                                                                                                                                                                                                                                                                                                                                                                                                                                                                                                                                                                                                                                                                                                                                                                                                                                                                                                                                                                                                                                                                                                                                                                                                                                                                                                                                                                                                                                                                                                                                                                                                                                                |
|----------|-----------------|-------------|------------------------------------------------------------------------------------------------------------------------------------------------------------------------------------------------------------------------------------------------------------------------------------------------------------------------------------------------------------------------------------------------------------------------------------------------------------------------------------------------------------------------------------------------------------------------------------------------------------------------------------------------------------------------------------------------------------------------------------------------------------------------------------------------------------------------------------------------------------------------------------------------------------------------------------------------------------------------------------------------------------------------------------------------------------------------------------------------------------------------------------------------------------------------------------------------------------------------------------------------------------------------------------------------------------------------------------------------------------------------------------------------------------------------------------------------------------------------------------------------------------------------------------------------------------------------------------------------------------------------------------------------------------------------------------------------------------------------------------------------------------------------------------------------------------------------------------------------------------------------------------------------------------------------------------------------------------------------------------------------------------------------------------------------------------------------------------------------------------------------------------------------------------------------------------------------------------------------------------------------------------------------------------------------------------------------------------------------------------------------------------------------------------------------------------------------------------------------------------------------------------------------------------------------------------------------------------------------------------------------------------------------------------------------------------------------------------------------------------------------------------------------------------------------------------------------------------------------------|
| Cancer   | 1KI tumor genes | 1.72E-06    | DUSP8,HDHD3,SEL1L3,LZTFL1,PPRC1,ADA,IFIT3,ANXA2,RPS6,HIBCH,RAD18,ALCAM,TSPYL4,TMEM43,UBE2C,SERPINB1,SETD7,ANKRD33B,HIS T2H2BF,BEX4,LY6E,OTUD7B,OAS1,POLG2,CiCa3a1/CiCa3a2,SPATS2L,DDX60,SOX9,CTH,CSRP3,IDI1,CLDN7,CX3CR1,ZDHHC14,HMGCS2,ABC11, JUND,TMEM45A,ELP4,MARCO,PBLD,H19,AURKA,AGXT,PIK3R3,IGF2,RPA3,GNS,E2F3,SIRT4,ARHGAP44,TNC,ALDH2,LEAP2,C16orf59,IGHM,HSPB 6,HSPA4L,TIMP3,TACC3,PSRC1,N4BP2L1,Scd2,ZNF213,ALS2,BIRC5,TUBB6,CKS1B,MALAT1,DEPDC1B,CTGF,ZNF784,QKI,F2R,MKI67,HBA1/HBA2, CTSV,CCNG1,SLC5A1,RAB17,ACAD10,GSTK1,UGT3A1,SLC22A4,PGM3,CIB3,CKAP2,AGFG2,PLS1,FAHD2B,AKR1D1,PTGER2,FAM195A,LRP2BP,C OL3A1,SQLE,HLA-A,PLAGL1,OXL1,GNA14,JUN,CSF2RA,MTM1,SORBS2,SLC17A1,SMPD3,GBP3,BRAP,Casp12,MDM2,Cyp2c54 (includes others),Meg3,CDK1,SCAMP5,PTK6,CELF2,AMDHD1,IRAK4,TFF3,FAT1,UNC5B,PBK,SH3YL1,TBC1D4,SETD4,GPC1,FPGS,RPRD2,GZMA,SOX4,SLC6 A8,ACSL3,GJA1,RPL12,AFP,TES,TMEM176A,ITIH5,CACNA2D1,Hbb-b2,PDLIM1,SYDE2,CYP4A11,FOXA3,HLA- E,SLC45A3,LYRM5,Ifi27l2a/Ifi27l2b,ERC2,BLNK,C5orf42,IFIT1B,SLC17A2,NAT2,KLB,ACAA2,Cyp2d13,ANGPTL4,UBE2U,EGLN3,CDCA5,IFRD1,MMP12 ,DBF4,COL5A2,UHRF1,SLC30A10,PHLDA3,PCOLCE2,BAX,IFI44,TSPAN8,EMP1,COL1A1,SDR42E1,PAPSS1,SLC1A2,NUCB2,TINAG,GLDC,PLET1,O SBPL3,FHOD3,DPYSL2,SPRR1A,EDA2R,SRL,IFIH1,ATP5SL,MADD,EGR2,PRSS8,CAV1,GOLT1B,ARHGAP12,AMACR,TP53INP1,CDCA8,MOSPD3,P YROXD2,ATL1,MTMR11,SLC13A4,GYPC,GGCX,OSGIN2,VLDLR,SMOC2,NDN,DDR1,AEN,CDH1,C5orf45,BTG2,UCK1,HHEX,CHRNA2,ALDH16A1,SA MD4A,NPDC1,RNF39,PHLDA2,OSGIN1,PGAP1,COL4A3,GDF15,FKBP7,SLC39A10,HTR1D,SEPT11,GAS2L3,PTGFRN,MYSM1,BICC1,NFE2L2,CYP51 A1,FBXO21,DHX58,Rrbp1,NSDHL,CACNA1D,ENTPD1,NRP2,SPATA2L,VIM,SLC29A1,MFN1,CCNE1,SELM,SERPINH1,CDKN1A,XAF1,CHMP4C,SHMT 1,PLEKHA1,PPARGC1A,DBNDD2,CAMK1D,SMC4,PARP12,SYNPO,ZNF248,RBP1,MYC,SHROOM3,B4GALNT1,RHOB,TMTC2,LECT1,CCDC149,CXCL 14,LPL,LRP11,ARHGAP11A,MYEF2,TIA1,IL6R,BACE1,HELLS,SGK2,CYB561,CCNB1,IRF7,RFX4,ARHGEF16,CPT2,EPCAM,PDK2,TMEM176B,MAST2, ABI2,TMEM206,FRZB,AP4B1,CDC20,PDE1A,TMEM63A,RAD51,CCNA2,AHNAK,TMC7,STEAP2,NOP58,ADCK3,DECR2,SLC20A1,DPP4,SDC1,ADTRP, RANBP3L,PPL,SLC13A2,LARS2,KIFC3,PCCA,SCARA3,DLAT,LGALS3BP,AMIGO1,SPATS2,SKIL,IVD,ACSL1,GRIA3,MAF,NCMAP,CXCL10,SCNN1A,D YNLL1,SPTLC2,DDAH1,RDH16,PITPNB,FFAR4,INCA1,PEG3,TPD52,LONP2,SAMD9L,ZNF385B,RSPH3,ZAK,IFIT2,ENC1,MAP2K6,ALDH4A1,DECR1,C A14,WWTR1,DUSP6,CWF19L1,SYCP3,CAMK2N2,ARMCX4,OASL,CHEK1,LIPA,TRIB1,FSTL1,SEC61A1,TUBA8,ANXA5,CLMN,TOP2A,ACSL4,PARK2, PLAC8,DDX50,CDC6,RAD51B,ATXN2L,RETSAT,ASPA,GOLM1,KRT8,S100A9,PDIA6,HECTD3,PM20D1,COL4A4,TMEM184C,DYNLT1,C11orf86,NPNT, STMN1,ZNF750,DLST,POLK,ASGR2,GCH1,TMIE,SPP1,FGFR1,MACROD1,CCDC120,WDR33,BAG4,ACADS,PANK1,TTC39A,CEP55,AIFM3,PDGFA,E PHB6,COL1A2,HIST1H2BH,ZMAT3,SLC10A2,PLK2,HPGD,PHF21A,HMGCS1,KIAA1919,ATP6V0E2,DLGAP4,MIPEP,PDE9A,GRHL1,HUNK,HIVEP2,PB X3,EXOC4,TLR5,NLRP12,G6PC,EIF2AK2,P2RX7,LGALS1 |

## Supplemental Table 10. General IPA functions for genes altered in 1KI or 3bKI tumors

| Category | Group            | B-H p-value | Genes                                                                                                                                                                                                                                                                                                                                                                                                                                                                                                                                                                                                                                                                                                                                                                                                                                                                                                                                                                                                                                                                                                                                                                                                                                                                                                                                                                                                                                                                                                                                                                                                                                                                                                                                                                                                                                                                                                                                                                                                                                                                                                                                                                                                                                                                                                                                                                                                                                                                                                                                                                                                                                                                                                                                                                                                                                                                                                                                                                                                                                                                                                                                                                                                                                                                                                                                                                                                                                                                                                                                                                                                                                                                                                                                                                                                                                                                                                                                                                                                                                                                                                                                                                                                                                                                                                                                                                                                                                                                                                                                                                                                                                                                  |
|----------|------------------|-------------|------------------------------------------------------------------------------------------------------------------------------------------------------------------------------------------------------------------------------------------------------------------------------------------------------------------------------------------------------------------------------------------------------------------------------------------------------------------------------------------------------------------------------------------------------------------------------------------------------------------------------------------------------------------------------------------------------------------------------------------------------------------------------------------------------------------------------------------------------------------------------------------------------------------------------------------------------------------------------------------------------------------------------------------------------------------------------------------------------------------------------------------------------------------------------------------------------------------------------------------------------------------------------------------------------------------------------------------------------------------------------------------------------------------------------------------------------------------------------------------------------------------------------------------------------------------------------------------------------------------------------------------------------------------------------------------------------------------------------------------------------------------------------------------------------------------------------------------------------------------------------------------------------------------------------------------------------------------------------------------------------------------------------------------------------------------------------------------------------------------------------------------------------------------------------------------------------------------------------------------------------------------------------------------------------------------------------------------------------------------------------------------------------------------------------------------------------------------------------------------------------------------------------------------------------------------------------------------------------------------------------------------------------------------------------------------------------------------------------------------------------------------------------------------------------------------------------------------------------------------------------------------------------------------------------------------------------------------------------------------------------------------------------------------------------------------------------------------------------------------------------------------------------------------------------------------------------------------------------------------------------------------------------------------------------------------------------------------------------------------------------------------------------------------------------------------------------------------------------------------------------------------------------------------------------------------------------------------------------------------------------------------------------------------------------------------------------------------------------------------------------------------------------------------------------------------------------------------------------------------------------------------------------------------------------------------------------------------------------------------------------------------------------------------------------------------------------------------------------------------------------------------------------------------------------------------------------------------------------------------------------------------------------------------------------------------------------------------------------------------------------------------------------------------------------------------------------------------------------------------------------------------------------------------------------------------------------------------------------------------------------------------------------------------------|
| Cancer   | 3bKI tumor genes | 6.48E-10    | DUSP8,LRG1,CP,MPP4,AFMID,PRR16,ANXA2,CD300C,TMEM43,ACOT9,SLC10A1,ANKRD33B,TRHDE,ARRDC3,BEX4,LY6E,UBE3C,UTP20,CALML4,PRPF38B,MARCKSL1,HSD3B1,EPHX2,RGL3,CLDN7,F11,SV2A,TMED7,ABCB11,HOMER1,JUND,TMEM45A,CEACAM1,PBLD,SMG6,LCN2,HARS2,INMT,GUF1,FAAP20,IGF2,BRWD1,AGBL3,ALDH18A1,MLKL,MCCC2,RAB11FIP5,MRPL15,GPHN,MARVELD1,GID4,C16orf59,FXYD3,ZFC3H1,PDK1,LASP1,Slco1a1,HERPUD1,MPP1,TUBB6,SPARC,MEF2C,MALAT1,SIK3,CTGF,DDX25,ANKRD17,TAPT1,FNDC3B,TRIM6-TRIM34,UPB1,ABCC6,DNAJC28,LENG1,HOOK3,ZBTB20,LSS,DHDH,KLF12,HIPK1,ANKHD1/ANKHD1-EIF4EBP3,PABPC1,UGT3A1,PGM3,RRAS,ZNF236,ADRBK2,ZC3HAV1,HBEGF,SYNCRIP,AGFG2,PLS1,FAHD2B,IFITM3,ACAD11,EML5,UBR1,FBXO30,KIAA0368,RCAN3,COL3A1,SUSD2,RBM47,SERAC1,NQO2,ST6GALNAC4,PPM1K,TYW1,TOP2B,CADM2,RIF1,CELA2A,THOC1,SMPD3,XKR8,SLC25A13,BRAP,GPRIN3,B4GALT6,SOX6,NFIA,PLCXD2,PRPF19,FAM234B,DNAI1,NAA50,CCDC47,SLC15A2,ZFP2,FAM208A,TBC1D4,FAM49B,DHTKD1,DI2,TFDP2,SLC6A8,MFSD2A,SEC14L3,COL4A1,BIRC6,AFP,SECISBP2L,GPR146,ZBTB44,MAP4K3,WHSC1L1,COL6A3,ATP6V1H,SYDE2,LYRM5,CRYZ,SLC17A2,ZNF394,DCAF8,ARHGAP42,RNPC3,THBS1,MARCH8,CYGB,KLHL24,HYAL1,PLEKHB1,HERC4,MARCH5,UBE3A,PPP1R3B,EMP1,COL1A1,PDILT,PAN3,TTC7A,PAPSS1,SLC25A32,PLET1,USP34,FHOD3,PIAS2,MYH9,ABAT,CYP4V2,SLC35C1,ZMYM5,RCL1,PLK4,ATP5SL,SNAI3,ANKRD28,MTX3,APCS,PRSS8,RNF217,CELA3B,ZKSCAN1,SLCO2B1,GREB1L,AMACR,PLD3,MTSS1,SPOPL,LHPP,MTMR11,CLASP2,SMOC2,HR,GPX7,SCP2,ZNF644,SQSTM1,BCL2A1,RBM39,MAGI3,KIAA0430,OGFRL1,PTTG1IP,HSD17B10,NOL7,NPDC1,AKAP8,HN1,GPR35,GDF15,HSD17B11,GPR107,SLC39A10,DNAJC13,MFGE8,SEPT11,CDKN3,OGT,DCUN1D4,ABC7,BICC1,SOS1,OCIAD1,PCDC6IP,CYP51A1,FBXO21,ICE1,SLC35A5,OPTN,NRP2,ERBB2IP,GNA12,SLC6A6,SPATA2L,VIM,TMEM25,LDLR,RMDN2,SERPINH1,CDKN1A,PSAP,CTSE,ST3GAL4,TCF7L2,BZW2,JMY,ARL6IP5,KIF1B,MSH3,VPS13A,JAM2,ZNF397,CD163,RBP1,RARG,GNMB,CXCL3,GPX3,B4GALNT1,ZDGRF5,SAE1,CYP1A2,SMPD4,RHOB,RUNX2,TMTC2,CCDC149,GDE1,CXCL14,LPL,FGFR1OP,NUPR1,AP5M1,MXI1,GLA,ATF3,LIPT2,TNPO1,BACE1,C5,ARIH1,NXPE2,ATP5C1,NPC1,RLF,UGP2,CCNY,SLC7A7,PECR,UHRF1BP1L,ZNF707,PDK2,TMEM176B,ELL2,AADAT,SLC1A4,AP4B1,FRZB,PUM1,TERT,PDE1A,NHSL1,LYST,RGS5,TIMP1,ADCK3,GNMT,FAM171B,DPP4,HAUS8,ADTRP,ST3GAL6,ACADSB,MTHFD1,LOC102724788/PRODH,HABP2,AMIGO1,DBT,HNRNPH3,PAFAH1B3,SFPQ,KPNA1,RICTOR,ADAMTS2,ATXN2,ZNF235,IPMK,SMARCC2,PEL12,WAPL,ERGIC2,IER3,KIAA0100,ERCC6L2,AKAP13,ANKRD11,RSPH3,YTHDF3,MS4A7,ENC1,ATAD1,PHLPP1,ALDH4A1,TPD52L1,OASL,NIPAL2,XLYB,CA3,LIPA,MYO1B,ANXA5,ADK,ABHD2,MCM10,LPP,PLAT,RSF1,ACOX1,MAPK8,PIK3C2G,SIN3A,RABGEF1,ASPA,GOLM1,PVT1,HECTD3,PEL1,CHFR,PEA15,COL4A4,RUFY3,MVD,CSNK2A1,ZBP1,TMEM184C,TMEM30A,DYNLT1,USF3,TMED5,CPSF6,KCNN1,FBXO11,CHPT1,CLCN3,DEPTOR,RPS6KB1,RBL2,SPP1,CDC37L1,FGFR1,MACROD1,IFT57,CD93,GPAT4,SEPW1,ELF1,PANK1,GGY1,SDS,MAP2K5,TAGLN2,PDGFA,TAOK1,TGIF1,BCL2,ROGDI,MCCC1,L2HGDH,CPNE3,ESRP2,VWCE,CCDC58,STRAP,GNAI2,LPCAT1,TANGO2,SMARCC1,C1orf131,SWT1,LGALS1,GAS6,MLLT4,SMARCD2,SEL1L3,SECISBP2,ESRRG,ELF3,BCAT2,SYPL1,AHCY,SON,NKTR,ACAA1,UPF3B,SP4,CDC73,CSF2RB,PRTN3,CD34,DPYS,EIF4EBP2,ANPEP,SMARCA4,FABP5,OTUD7B,PLOD2,OAS1,UCP2,TUBB4B,POLG2,C1ca3a1/C1ca3a2,DHX36,PARP4,GIT2,CTH,SDF4,NAV2,RAB14,MICALL2,HGD,HMGCS2,ZDHHC14,PTEN,FNDC4,H19,RIMS4,HEATR3,CAND1,ADCY9,TMEM19,SLC7A2,CCDC80,PPAT,PEBP1,ZFP91,SFTPD,PC,SLC13A5,IQGAP1,STK11IP,ALDH2,ARHGAP44,TNC,DHCR7,OTC,LEAP2,ZNF24,IGHM,HSPB6,AP3M1,N4BP2L1,MTO1,PDK3,ALS2,POLR3B,ZC3H4,ITM2C,CCP110,BMP4,HSD17B13,CMTM4,GTPBP10,SLC15A4,LGMN,IRX3,SLC5A1,PRKD3,UBE2Q2,ACBD5,DPY19L1,YWHAZ,C5orf34,MON2,LMAN1,SPON2,ARHGAP5,OPHN1,MTMR4,AMMECR1L,KRT18,AGPAT3,FAM195A,SQLE,BTG3,PPP1R3C,PSMD9,MVK,FAM174B,LIN7A,EIF4G1,LYZ,JUN,PDE3B,GID8,SLC17A1,XPO4,PURA,OSBPL9,C2orf44,PAICS,MARCH6,Cyp2c54 (includes others),SCAMP5,FGF21,TBX20,CLEC7A,GALE,ANXA3,UAP1L1,NEURL1,ATAD3A,RBBP6,TFF3,RMDN1,FZD3,HECTD2,UNC5B,SLPI,B3GALT1,PXMP4,NID1,GSPT1,PCYT1B,ZSCAN12,ZNF318,GPC1,RC3H2,HIST1H3F,MYO6,SOX4,CMPK2,USP38,HSPA9,NASP,TMEM176A,LUC7L2,ITIH5,LOXL1,NCOA1,PDLIM1,CD14,CLCN7,JAG1,CLINT1,lfi27l2a/lfi27l2b,BLNK,TMTC3,PA2G4,TLE2,IFIT1B,USP6NL,FMO5,SLC38A4,EGLN3,Pvr,MMP12,FAM149A,PLSCR1,UBR5,COL5A2,MTRR,PHLDA3,GGCT,FNIP1,ACSM3,TSPAN8,Anp32a,CDKN2AIP,PGLYRP1,FZD4,U2SURP,HM13,ACAT1,NUCB2,Sf1,NFIB,IKBKAP,TINAG,FYCO1,TOPORS,PLPP2,ABCG8,ZNF800,CCDC22,SPRR1A,XDH,GSTA5,SLC35E3,SERPINA3,TOMM70A,ADRB3,RB1,HAPLN4,EGR2,KIF13A,Ly6a (includes others),ARHGAP12,DNAJC22,ALDH7A1,SERBP1,PYROXD2,PROSC,RHOBTB3,SLC13A4,ARSG,PPTC7,GYPC,VLDLR,RNF138,DDR1,MET,CDH1,GIPC2,SULT4A1,CNOT7,BTG2,DHX40,CYP2B6,SAMD4A,ENTPD7,PRDX2,ANK3,TRIM33,CYP4F8,PHLDA2,PGAP1,COL4A3,MCC,IGFBP7,GLIPR1,TGM2,AMN1,ISYNA1,AR,CHDH,LDAH,OSBPL11,HJURP,ALDH5A1,Rrbp1,MEMO1,NSDHL,CACNA1D,TOB1,PDPR,AGL,TGS1,PCNX,GALM,GLG1,TRMT1L,X |



**Supplemental Table 10. General IPA functions for genes altered in 1KI or 3bKI tumors**

| Category          | Group            | B-H p-value | Genes                                                                                                                                                                                                                                                                                                                                                                                                                                                                                                                                                                                                                                                                                                                                                                                                                                                                                                                                                                                                                                                                                                                                                                                                                                                                                                                                                                                                                                                                                                                                               |
|-------------------|------------------|-------------|-----------------------------------------------------------------------------------------------------------------------------------------------------------------------------------------------------------------------------------------------------------------------------------------------------------------------------------------------------------------------------------------------------------------------------------------------------------------------------------------------------------------------------------------------------------------------------------------------------------------------------------------------------------------------------------------------------------------------------------------------------------------------------------------------------------------------------------------------------------------------------------------------------------------------------------------------------------------------------------------------------------------------------------------------------------------------------------------------------------------------------------------------------------------------------------------------------------------------------------------------------------------------------------------------------------------------------------------------------------------------------------------------------------------------------------------------------------------------------------------------------------------------------------------------------|
| Cell Morphology   | 1KI tumor genes  | 9.46E-06    | DPYSL2,CTGF,F2R,HBA1/HBA2,SRL,Akr1b7,CXCL10,DYNLL1,MADD,DDAH1,CAV1,ADA,RAB17,GSTK1,FFAR4,ATL1,CIDEC,ANXA2,TPD52,VLDLR,NDN,PLS1,DDR1,CDH1,Bmp8b,BTG2,RAD18,PTGER2,HHEX,IFIT2,ENC1,UBE2C,COL3A1,MAP2K6,HLA-A,WWTR1,COL4A3,PLAGL1,GDF15,HEXA,SYCP3,SEPT11,CHEK1,LIPA,TRIB1,FSTL1,PTGFRN,JUN,CLMN,MTM1,PARK2,NFE2L2,CACNA1D,NRP2,POLG2,Cd24a,VIM,MDM2,Meg3,CDK1,MFN1,KRT8,SERPINH1,CDKN1A,SOX9,CSRP3,PPARGC1A,CAMK1D,CAV2,FAT1,Tpm1,SYNPO,CX3CR1,DYNLT1,PNRC2,RBP1,STMN1,MYC,B4GALNT1,TBC1D4,RHOB,LPL,CXCL14,ABCB11,MARCO,SOX4,GJA1,SPP1,FGFR1,IL6R,BACE1,HELLS,AURKA,METRN,RFX4,IGF2,Hbb-b2,EPCAM,TMEM176B,ERC2,BLNK,ABI2,C5orf42,CDC20,PDGFA,E2F3,EPHB6,CCNA2,TNC,ANGPTL4,COQ7,IGHM,EGLN3,DPP4,TIMP3,COL5A2,TACC3,FBXO31,Scd2,BAX,BIRC5,ALS2,HIVEP2,COL1A1,AMIGO1,SKIL,P2RX7,LGALS1                                                                                                                                                                                                                                                                                                                                                                                                                                                                                                                                                                                                                                                                                                                                                                   |
| Cell Morphology   | 3bKI tumor genes | 9.05E-05    | PIAS2,MYH9,GAS6,MLLT4,CP,ADRB3,RB1,PLK4,SNAI3,Tmsb4x (includes others),Ly6a (includes others),MPP4,MTSS1,ARSG,ANXA2,CLASP2,VLDLR,DDR1,SP4,MET,CDH1,CNOT7,SCP2,BTG2,CD34,PRDX2,ANK3,KLF15,EIF4EBP2,COL4A3,GDF15,HEXA,SEPT11,IGFBP7,ANPEP,SMARCA4,OGT,AR,SOS1,PDCD6IP,CACNA1D,NRP2,OPTN,POLG2,ERBB2IP,GNA12,SLC6A6,VIM,TOB1,AGL,MARCKSL1,LDLR,SERPINH1,CDKN1A,PSAP,ST3GAL4,TCF7L2,PPARGC1A,LGALS3,GDA,JMY,EPHX2,MICALL2,JAM2,PDPK1,SYNPO,ODF2,RARG,RBP1,TSC22D3,PTEN,F11,SV2A,HSPA4,B4GALNT1,CYP1A2,ADGRF5,UBE2B,RHOB,LECT1,RUNX2,FGFR1OP,LPL,CXCL14,ABCB11,MXI1,GLA,ATF3,SYNE2,UBE4B,LCN2,IL6R,RIMS4,BACE1,NR2C2,CAPG,C5,IGF2,ANKRD1,SIRT1,IGFBP3,CCNY,EPCAM,TMEM176B,SIRPA,CD151,PEBP1,AADAT,SFTPD,TERT,CSRP1,ATF6,CADPS2,GPHN,IQGAP1,TNC,TGFB11I,LYST,ZNF24,PRKAA2,OPA1,IGHM,LASP1,RAD23B,DPP4,FBXO31,ST3GAL6,PKHD1,ALS2,MPP1,FGF1,AMIGO1,SPARC,PAFAH1B3,SIK3,CTGF,BMP4,DDX25,RICTOR,ADAMTS2,Akr1b7,PCOLCE,ATXN2,HOOK3,LGMN,DDAH1,TARDBP,PRKD3,KALRN,Ank2,OAT,CREBBP,YWHAZ,HBEGF,SYNCRIP,IER3,PLS1,ARHGAP5,OPHN1,AKAP13,CCND2,KRT18,CYR61,ENC1,KDM5A,PHLPP1,COL3A1,SPTBN1,MAP2K6,BTG3,SYCP3,TOP2B,PKP4,FSTL1,LIPA,JUN,PDE3B,ANXA5,CLMN,RB1CC1,SORT1,PURA,PLAT,ACTB,ACOX1,MAPK8,RABGEF1,FGF21,KRT8,NFIA,CHFR,PEA15,NEURL1,IREB2,RUFY3,NEDD9,CSNK2A1,FAM234B,TAF10,DYNLT1,NID1,PCYT1B,TBC1D4,RORA,NEO1,CLCN3,FARP2,PKD4,MYO6,DEPTOR,SOX4,MFSD2A,RPS6KB1,RBL2,SPP1,TMEM106B,FGFR1,IFT57,GPAT4,NCOA1,CLCN7,MAP2K5,BLNK,NFIX,PDGFA,TAOK1,TGIF1,CPEB3,BCL2,EPHB6,THBS1,ANXA1,EGLN3,PLSCR1,COL5A2,CXCR4,HYAL1,SGMS2,GABBR1,UBE3A,COL1A1,Ptprd,NFIB,LGALS1 |
| Cellular Movement | 1KI tumor genes  | 5.98E-08    | MALAT1,DPYSL2,CTGF,F2R,CTSV,SCNN1A,CXCL10,EGR2,ADA,CAV1,TP53INP1,FFAR4,ANXA2,VLDLR,PLS1,DDR1,NDN,CDH1,ZAK,BTG2,ALCAM,PTGER2,HHEX,IFIT2,COL3A1,LY6D,MAP2K6,SERPINB1,PHLDA2,HLA-A,OSGIN1,DUSP6,WWTR1,COL4A3,GDF15,SEPT11,TRIB1,FSTL1,LIPA,JUN,MYSM1,CSF2RA,ANXA5,ACSL4,PARK2,NFE2L2,ENTPD1,NRP2,Cd24a,VIM,MDM2,CDK1,KRT8,S100A9,SERPINH1,CDKN1A,PTK6,SOX9,IRAK4,TFF3,CAMK1D,FAT1,UNC5B,Tpm1,CLDN7,CX3CR1,RBP1,PBK,MYC,STMN1,SERP1,RHOB,CXCL14,JUND,GPC1,MARCO,SOX4,GJA1,SPP1,FGFR1,IL6R,AFP,AURKA,BAG4,IGF2,IRF7,ARHGEF16,PDLIM1,EPCAM,TMEM176B,PDGFA,CCL24,E2F3,EPHB6,ALDH2,TNC,CCNA2,ANGPTL4,AHNAK,HSPG,IGHM,EGLN3,Pvr,MMP12,DBF4,TIMP3,DPP4,SDC1,PCOLCE2,BAX,BIRC5,SPAN8,COL1A1,TLR5,NLRP12,LGALS3BP,SLC1A2,NUCB2,G6PC,EIF2AK2,SKIL,CPEB1,PLET1,P2RX7,LGALS1,GRIA3                                                                                                                                                                                                                                                                                                                                                                                                                                                                                                                                                                                                                                                                                                                                                                                 |

**Supplemental Table 10. General IPA functions for genes altered in 1KI or 3bKI tumors**

| Category                                   | Group            | B-H p-value | Genes                                                                                                                                                                                                                                                                                                                                                                                                                                                                                                                                                                                                                                                                                                                                                                                                                                                                                                                                                                                                                                                                                                                                                                                                                                                                                                                                                                                                                                                                                                                                                 |
|--------------------------------------------|------------------|-------------|-------------------------------------------------------------------------------------------------------------------------------------------------------------------------------------------------------------------------------------------------------------------------------------------------------------------------------------------------------------------------------------------------------------------------------------------------------------------------------------------------------------------------------------------------------------------------------------------------------------------------------------------------------------------------------------------------------------------------------------------------------------------------------------------------------------------------------------------------------------------------------------------------------------------------------------------------------------------------------------------------------------------------------------------------------------------------------------------------------------------------------------------------------------------------------------------------------------------------------------------------------------------------------------------------------------------------------------------------------------------------------------------------------------------------------------------------------------------------------------------------------------------------------------------------------|
| Cellular Movement                          | 3bKI tumor genes | 1.05E-07    | MYH9,GAS6,XDH,MLLT4,SERPINA3,Cxcl9,ADRB3,RB1,ANKRD28,ELF3,Tmsb4x (includes others),EGR2,APCS,Ly6a (includes others),AHCY,MTSS1,ANXA2,CLASP2,VLDLR,DDR1,MET,CSF2RB,CDH1,PRTN3,BTG2,SQSTM1,CD34,PRDX2,ANK3,WDR26,PHLDA2,KCNE3,COL4A3,GDF15,MFGE8,SEPT11,ANPEP,SMARCA4,CDKN3,TGM2,ARRDC3,AR,CHDH,SOS1,FABP5,UCP2,NRP2,GNA12,VIM,GIT2,MARCKSL1,LDLR,SERPINH1,CDKN1A,TAGLN,CTSE,ST3GAL4,TCF7L2,LGALS3,JMY,KLF6,JAM2,PDPK1,CLDN7,RBP1,TSC22D3,PTEN,CXCL3,CYP1A2,ADGRF5,RHOB,RUNX2,FKRP,CXCL14,FGFR1OP,JUND,CEACAM1,SYNE2,ATF3,IL6R,LCN2,PCSK6,NR2C2,CAPG,C5,NPC1,IGF2,ARHGEF16,SIRT1,IGFBP3,EPCAM,PLCB3,P2RY1,TMEM176B,SIRPA,CD151,PEBP1,SFTPD,TERT,CADPS2,IQGAP1,ALDH2,TNC,TGFB111,LYST,TIMP1,SAA1,ZNF24,PRKAA2,IGHM,PDK1,LASP1,DPP4,ST3GAL6,ECSER,MPP1,FGF1,HABP2,LGALS3BP,SPARC,MEF2C,GRIA3,MALAT1,CTGF,BMP4,APOB,FNDC3B,RICTOR,SCNN1A,LGMN,SMG1,FBLN5,KALRN,RRAS,TKT,YWHAZ,HBEGF,IER3,PLS1,SPON2,ARHGAP5,IFITM3,CYR61,KDM5A,COL3A1,LY6D,MME,MAP2K6,KLK3,NQO2,TPD52L1,GBF1,COL4A2,TOP2B,CA3,FSTL1,LIPA,LYZ,MYO1B,JUN,ANXA5,EIF3A,ABHD2,SORT1,LPP,PLAT,NFIC,ACTB,ATG3,PIK3C2G,MAPK8,AGO2,RABGEF1,TBX20,CLEC7A,KRT8,NFIA,CHFR,PELI1,ANXA3,NEURL1,NEDD9,RUFY3,KIF1C,CSNK2A1,TFF3,FZD3,DNAI1,SPHK2,UNC5B,SLPI,NUS1,TMEM30A,MTCH2,RORA,NEO1,GPC1,CLCN3,SOX4,MYO6,DEPTOR,RPS6KB1,SPP1,COL4A1,FGFR1,CD93,AFP,BAG4,PPIC,SLC37A4,NCOA1,PDLIM1,CD14,JAG1,MAP2K5,TAGLN2,NFIX,PA2G4,PDGFA,IRF3,LOXL2,BCL2,EPHB6,THBS1,ANXA1,HPGD,EGLN3,CYGB,ACKR4,Pvr,MMP12,CPNE3,ESRP2,CXCR4,HYAL1,CCAR1,XIAP,TSPAN8,Ccl9,GNAI2,PGLYRP1,COL1A1,FZD4,ACAT1,NUCB2,IKBKAP,PLET1,LGALS1 |
| Cell Cycle                                 | 1KI tumor genes  | 2.76E-07    | QKI,SYNPO,DDIAS,MKI67,CXCL10,MYC,STMN1,CCNG1,MADD,RHOB,CXCL14,CAV1,GPC1,POLK,AMACR,TP53INP1,GJA1,CDCA8,SPP1,H19,FGFR1,IL6R,ANXA2,CKAP2,HELLS,AURKA,CCNB1,RPS6,IRF7,CDH1,IGF2,RPA3,ZAK,BTG2,RAD18,EPCAM,PDK2,CEP55,UBE2C,BLNK,MAP2K6,CDC20,OSGIN1,PLAGL1,GDF15,SYCP3,SEPT11,CAMK2N2,E2F3,CHEK1,RAD51,TNC,CCNA2,JUN,AHNAK,PLK2,HPGD,TOP2A,IGHM,Pvr,CDCA5,PARK2,PLAC8,NFE2L2,DBF4,DPP4,TACC3,FBXO31,UHRF1,BRAP,CDC6,NABP1,MDM2,BAX,BIRC5,CDK1,EMP1,COL1A1,CCNE1,KRT8,CDKN1A,CKS1B,SOX9,CTH,SKIL,EIF2AK2,IRAK4,LGALS1                                                                                                                                                                                                                                                                                                                                                                                                                                                                                                                                                                                                                                                                                                                                                                                                                                                                                                                                                                                                                                     |
| Cell Cycle                                 | 3bKI tumor genes | 2.70E-05    | BMP4,PIAS2,ANKRD17,GAS6,SFPQ,DDIAS,ESRRG,RB1,PLK4,TARDBP,Ly6a (includes others),ZBTB20,VCIPI1,PRKD3,AMACR,WAPL,SON,CREBBP,HBEGF,ANXA2,IER3,UBE2S,MET,CDH1,CCND2,PPP2R3A,BTG2,KRT18,CYR61,BCL2A1,KDM5A,MAP2K6,TRIM33,AKAP8,KLK3,BTG3,GDF15,TPD52L1,SYCP3,GBF1,IGFBP7,GLIPR1,SMARCA4,TOP2B,CDKN3,AR,JUN,RB1CC1,MCM10,THOC1,PURA,OSBPL9,BRAP,GNA12,MAPK8,NUP153,KRT8,SF3B2,CHFR,CDKN1A,PEA15,PSAP,NR5A2,CTH,NEDD9,RBBP6,TCF7L2,KIF1C,DLGAP5,CSNK2A1,PRPF19,LGALS3,JMY,SPHK2,KLF6,TAF10,RARG,MTCH2,PTEN,GSPT1,RHOB,RUNX2,CXCL14,NUPR1,GPC1,TFDP2,CEACAM1,MXI1,RPS6KB1,RBL2,ATF3,H19,SPP1,ZMYM2,FGFR1,IL6R,BIRC6,C5,FAAP20,NASP,IGF2,SMARCA2,SIRT1,IGFBP3,EPCAM,CCNY,PEBP1,BLNK,PA2G4,GTTF2,PUM1,TERT,TAOK1,TGIF1,BCL2,TNC,THBS1,TIMP1,HPGD,PRKAA2,IGHM,Pvr,PDK1,PLSCR1,UBR5,DPP4,HAUS8,ATRX,HYAL1,UBE3A,XIAP,FGF1,Anp32a,EMP1,COL1A1,LOC102724788/PRODH,SPARC,PLPP2,TXLNG,LGALS1                                                                                                                                                                                                                                                                                                                                                                                                                                                                                                                                                                                                                                                                          |
| DNA Replication, Recombination, and Repair | 1KI tumor genes  | 4.21E-05    | TFF3,F2R,MAF,DDIAS,PBK,CXCL10,CCNG1,MYC,ADA,CAV1,ELP4,POLK,GZMA,GJA1,SPP1,H19,TIA1,FGFR1,MACROD1,HELLS,AURKA,SMOC2,CCNB1,AEN,PIK3R3,RPS6,IGF2,RPA3,IRF7,ZAK,BTG2,RAD18,Aim,CDC20,PDGFA,SETD7,E2F3,SIRT4,CHEK1,RAD51,TNC,ALDH2,CCNA2,ZMAT3,JUN,PLK2,TOP2A,DBF4,TACC3,FBXO31,ENTPD1,UHRF1,POLG2,PHLDA3,CDC6,NABP1,MDM2,BAX,SLC29A1,Meg3,BIRC5,CDK1,CCNE1,KRT8,CDKN1A,CHMP4C,CKS1B,CTH,TINAG,EIF2AK2,LGALS1,PPARGC1A                                                                                                                                                                                                                                                                                                                                                                                                                                                                                                                                                                                                                                                                                                                                                                                                                                                                                                                                                                                                                                                                                                                                     |
| DNA Replication, Recombination, and Repair | 3bKI tumor genes | 3.85E-03    | PEBP1,LGALS3,APOB,BMP4,PDGFA,TFR2,TERT,IRF3,IQGAP1,SMARCA4,PTEN,TNC,RB1,AR,JUN,RUNX2,ADK,CEACAM1,RPS6KB1,RBL2,SPP1,ATF3,FBLN5,POLG2,FGFR1,GNA12,MAPK8,HBEGF,SMOC2,FGF1,GNAI2,MET,AKAP13,IGF2,CCND2,LDLR,Hnmpa1,CDKN1A,NCOA1,IGFBP3,SPARC,IKBKAP,CTH,CYR61,PPAT,MAP2K5,LGALS1                                                                                                                                                                                                                                                                                                                                                                                                                                                                                                                                                                                                                                                                                                                                                                                                                                                                                                                                                                                                                                                                                                                                                                                                                                                                          |

**Supplemental Table 10. General IPA functions for genes altered in 1KI or 3bKI tumors**

| Category                | Group            | B-H p-value | Genes                                                                                                                                                                                                                                                                                                                                                                                                                                                                                                                                                                                                                                                                                                                                                                                                                                                                                                                                                                                                                                                                                                                                                                                                                                                                                                                                                                                                                                                                                                                                                                                                                                                                                                                                                                                                                                                                                                                                                                                                                                                                                                                                                                                                                                                                                               |
|-------------------------|------------------|-------------|-----------------------------------------------------------------------------------------------------------------------------------------------------------------------------------------------------------------------------------------------------------------------------------------------------------------------------------------------------------------------------------------------------------------------------------------------------------------------------------------------------------------------------------------------------------------------------------------------------------------------------------------------------------------------------------------------------------------------------------------------------------------------------------------------------------------------------------------------------------------------------------------------------------------------------------------------------------------------------------------------------------------------------------------------------------------------------------------------------------------------------------------------------------------------------------------------------------------------------------------------------------------------------------------------------------------------------------------------------------------------------------------------------------------------------------------------------------------------------------------------------------------------------------------------------------------------------------------------------------------------------------------------------------------------------------------------------------------------------------------------------------------------------------------------------------------------------------------------------------------------------------------------------------------------------------------------------------------------------------------------------------------------------------------------------------------------------------------------------------------------------------------------------------------------------------------------------------------------------------------------------------------------------------------------------|
| Cell Survival           | 1KI tumor genes  | 2.78E-11    | SPRR1A,DDIAS,EDA2R,IFIH1,EGR2,MADD,PRSS8,ADA,CAV1,AMACR,IFIT3,TP53INP1,CIDECA,ANXA2,DDR1,NDN,AEN,RPS6,CDH1,BTG2,RAD18,ALCAM,HHEX,UBE2C,USP18,OSGIN1,PHLDA2,COL4A3,GDF15,Dleu2,SLC39A10,MYSM1,OTUD7B,NFE2L2,DHX58,OAS1,CACNA1D,ENTPD1,CiCa3a1/CiCa3a2,VIM,SLC29A1,MFN1,CCNE1,SERPINH1,CDKN1A,XAF1,SOX9,CTH,PPARGC1A,CAMK1D,CX3CR1,CLDN7,RBP1,MYC,B4GALNT1,RHOB,JUND,TIA1,IL6R,BACE1,HELLS,AURKA,FN3K,CCNB1,IRF7,IGF2,EPCAM,CDC20,FRZB,CCL24,E2F3,SIRT4,RAD51,CCNA2,ALDH2,TNC,NOP58,ADCK3,IGHM,HSPB6,SLC20A1,DPP4,TIMP3,TACC3,FBXO31,SDC1,BIRC5,ALS2,KIFC3,TUBB6,LGALS3BP,SKIL,GRIA3,MALAT1,CTGF,F2R,QKI,MAF,MIF4GD,HBA1/HBA2,MKI67,CXCL10,CCNG1,CTSV,DYNLL1,SPTLC2,FFAR4,CKAP2,PEG3,TPD52,PLS1,ZNF385B,Bmp8b,ZAK,PTGER2,IFIT2,ENC1,MAP2K6,DECR1,HLA-A,DUSP6,PLAGL1,SYCP3,CAMK2N2,CHEK1,FSTL1,TRIB1,LIPA,JUN,CSF2RA,ANXA5,MTM1,TOP2A,ACSL4,SORBS2,PARK2,PLAC8,SMPD3,CDC6,Cd24a,NABP1,Casp12,MDM2,Meg3,CDK1,KRT8,S100A9,PTK6,IRAK4,TFF3,FAT1,UNC5B,PBK,NPNT,STMN1,SERP1,DLST,GPC1,FPGS,POLK,GZMA,SOX4,SLC6A8,GCH1,GJA1,SPP1,FGFR1,AFP,BAG4,Hbb-b2,HLA-E,BLNK,AIFM3,PDGFA,KLB,EPHB6,ZMAT3,ANGPTL4,PLK2,HPGD,EGLN3,Pvr,IFRD1,UHRF1,PDE9A,SLC30A10,PHLDA3,BAX,HUNK,EMP1,COL1A1,PBX3,SLC1A2,G6PC,TINAG,EIF2AK2,CPEB1,P2RX7,LGALS1                                                                                                                                                                                                                                                                                                                                                                                                                                                                                                                                                                                                                                                                                                                                                                                                                                                                                                                                                                                                                                                                          |
| Cell Survival           | 3bKI tumor genes | 1.23E-07    | MYH9,PIAS2,GAS6,XDH,SPRR1A,SERPINA3,DDIAS,CP,Cxcl9,RB1,PLK4,ELF3,EGR2,APCS,PRSS8,VAMP3,AMACR,SON,ANXA2,GPX7,DDR1,MET,DC73,CSF2RB,CDH1,SCP2,PRTN3,BTG2,SQSTM1,CYP2B6,BCL2A1,PRDX2,HSD17B10,ANK3,TRIM33,USP18,WDR26,AKAP8,PHLDA2,COL4A3,GDF15,Dleu2,SLC39A10,MFGE8,IGFBP7,ANPEP,GLIPR1,SMARCA4,TGM2,CDKN3,OGT,AR,ZC3H8,ABCB7,NAT8B,PDCD6IP,OTUD7B,OAS1,CACNA1D,UCP2,OPTN,GNA12,CiCa3a1/CiCa3a2,PARP4,SLC6A6,VIM,LDLR,SERPINH1,CDKN1A,XAF1,PSAP,CTH,CTSE,ABCC3,TCF7L2,PPARGC1A,AKAP1,ABC B6,LGALS3,GDA,JMY,MSH3,KIF1B,ARL6IP5,ATP2B1,EPHX2,VPS13A,KLF6,PDPK1,CLDN7,RBP1,RARG,TSC22D3,PTEN,F11,CXCL3,FDFT1,HSPA4,B4GALNT1,SUPT6H,RHOB,UBE2B,SMPD4,RUNX2,FGFR1OP,NUPR1,HOMER1,JUND,HEBP2,MXI1,CEACAM1,ATF3,ZMYM2,UBE4B,PCSK6,IL6R,LCN2,NR2C2,BACE1,FN3K,FAAP20,C5,NPC1,IGF2,ANKRD1,SIRT1,IGFBP3,EPCAM,CCDC80,PPAT,SIRPA,MLKL,CD151,PEBP1,SFTPD,FRZB,PUM1,TE RT,CADPS2,ATF6,GPHN,IQGAP1,TNC,ALDH2,DHCR7,TGFB11,RGS5,TIMP1,SAA1,ADCK3,PRKAA2,OPA1,IGHM,GNMT,PKC1,RAD23B,HSPB6,NDUFAF4,DPP4,FBXO31,HAUS8,ATRX,HERPUD1,PKHD1,ALS2,ECSCR,FGF1,LOC102724788/PRODH,TUBB6,LGALS3BP,SPARC,MEF2C,GRIA3,PAFAH1B3,MALAT1,CCP110,DDX25,DYPD,BMP4,APOB,CTGF,TFR2,SFPQ,RICTOR,ABCC6,ATXN2,ALDH1L1,IPMK,LGMN,TARDBP,ZBTB20,SMARCC2,SMG1,HIPK1,PRKD3,WAPL,RRAS,CREBBP,YWHAZ,HBEGF,UBE2S,IER3,PLS1,AKAP13,CCND2,PPP2R3A,AHCTF1,KRT18,CYR61,ENC1,PHLPP1,SPTBN1,MAP2K6,MME,DECR1,KLK3,BTG3,NQO2,MVK,TPD52L1,SYCP3,COL4A2,EIF4G1, TOP2B,FSTL1,LIPA,CA3,LYZ,JUN,ANXA5,ADK,CELA2A,EIF3A, RB1CC1, SORT1, MCM10, THOC1, PURA, SMPD3, PLAT, RSF1, NFIC, ACTB, ATG3, MAPK8, AGO2, SRXN1, DUSP14, SIN3A, RABGEF1, FGF21, TBX20, KRT8, SOX6, CHFR, PEA15, NR5A2, NEURL1, ATAD3A, IREB2, NEDD9, RBBP6, KIF1C, TFF3, CSNK2A1, PRPF19, ATXN3, FZD3, SPHK2, UNC5B, SLPI, TAF10, CCDC47, Defb1, NEO1, TFDP2, GPC1, NAA16, CLCN3, SLC01B3, PDK4, MYO6, SOX4, DEPTOR, RPS6KB1, SLC6A8, RBL2, SPP1, COL4A1, FGF1, IFT57, HSPA9, BIRC6, AFP, BAG4, SMOX, SMARCA2, SLC37A4, NCOA1, CD14, CLCN7, Nr1p2, JAG1, MAP2K5, TAGLN2, BLNK, AIFM3, NFIX, PA2G4, PDGFA, PPP1CB, IRF3, TAOX1, LOXL2, BCL2, EPHB6, TNRC6A, THBS1, MARCH8, ANXA1, HPGD, EGLN3, Pvr, PLSCR1, HIPK3, CXCR4, PHLDA3, HYAL1, GPT, CCAR1, GABBR1, YBX3, S GMS2, UBE3A, XIAP, FNIP1, Ccl9, GNAI2, EMP1, FDPS, COL1A1, PGLYRP1, ACAT1, IKBKAP, NFIB, SMARCC1, TINAG, TOPORS, LGALS1 |
| Amino Acid Metabolism   | 3bKI tumor genes | 1.14E-05    | ABAT,GTPBP10,HGD,UPB1,BCAT2,RUNX2,DDAH1,HOMER1,SLCO1B3,PDK4,AFMID,SLC6A8,TDO2,OAT,C5,MET,PANK1,HIBADH,SLC7A2,SIRT1,NCOA1,SLC7A7,ALDH18A1,SDS,PPAT,MCCC2,AADAT,BCL2,OTC,PRKAA2,GNMT,SMPD3,ALDH5A1,Slco1a1,SLC25A13,MTRR,SLC6A6,ATG3,MAPK8,GPT,MTHFD1,ASPA,FGF1,SARDH,LDLR,LOC102724788/PRODH,DBT,SLC25A32,CTH,IVD                                                                                                                                                                                                                                                                                                                                                                                                                                                                                                                                                                                                                                                                                                                                                                                                                                                                                                                                                                                                                                                                                                                                                                                                                                                                                                                                                                                                                                                                                                                                                                                                                                                                                                                                                                                                                                                                                                                                                                                    |
| Carbohydrate Metabolism | 1KI tumor genes  | 3.44E-04    | DECR1,CTGF,F2R,PLAGL1,GDF15,HEXA,RBP1,KLB,Akr1b7,MYC,FSTL1,MADD,TBC1D4,CSF2RA,SLC5A1,ANXA5,LPL,CXCL14,ADA,CAV1,MTM1,ABC B11,EGLN3,PARK2,DPP4,TP53INP1,SPP1,FFAR4,CIDECA,BACE1,BAX,Slco1a4,PANK1,IGF2,PCCA,SLC1A2,NUCB2,G6PC,EIF2AK2,PDK2,CTH,ACSL1,PPARGC1A                                                                                                                                                                                                                                                                                                                                                                                                                                                                                                                                                                                                                                                                                                                                                                                                                                                                                                                                                                                                                                                                                                                                                                                                                                                                                                                                                                                                                                                                                                                                                                                                                                                                                                                                                                                                                                                                                                                                                                                                                                         |

## Supplemental Table 10. General IPA functions for genes altered in 1KI or 3bKI tumors

| Category                | Group            | B-H p-value | Genes                                                                                                                                                                                                                                                                                                                                                                                                                                                                                                                                                                                                                                                                                                                                                                                                                                                                                                                                                                                                                                                                                                                                                                                                                                                       |
|-------------------------|------------------|-------------|-------------------------------------------------------------------------------------------------------------------------------------------------------------------------------------------------------------------------------------------------------------------------------------------------------------------------------------------------------------------------------------------------------------------------------------------------------------------------------------------------------------------------------------------------------------------------------------------------------------------------------------------------------------------------------------------------------------------------------------------------------------------------------------------------------------------------------------------------------------------------------------------------------------------------------------------------------------------------------------------------------------------------------------------------------------------------------------------------------------------------------------------------------------------------------------------------------------------------------------------------------------|
| Carbohydrate Metabolism | 3bKI tumor genes | 7.02E-05    | SIK3,BMP4,CTGF,CP,ADRB3,Akr1b7,ATXN2,ESRRG,BCAT2,SLC5A1,ZBTB20,DHDH,PRKD3,UGT3A1,Ank2,PGM3,SLC35A3,ADRBK2,TKT,CREBBP,H BEGF,MET,CSF2RB,PRPS2,CNOT7,SCP2,SQSTM1,PRDX2,KLF15,MAP2K6,DECR1,SLC10A1,GPR35,PPP1R3C,PGAP1,GDF15,HEXA,XYLB,OGT,FS TL1,PDE3B,ANXA5,FABP5,SORT1,B3GALNT2,ALDH5A1,PLAT,STX12,SLC25A13,OAS1,UCP2,OPTN,MAPK8,AGL,GALM,FGF21,LDLR,GALE,PEA15,C TH,ABCC3,TCF7L2,PPARGC1A,LGALS3,EPHX2,SLC35D1,PDPK1,RBP1,B3GALT1,PTEN,CXCL3,B4GALNT1,TBC1D4,SMPD4,LECT1,CXCL14,LPL,AB CB11,CHPT1,GPC1,CLCN3,SLCO1B3,CEACAM1,PDK4,RPS6KB1,GLA,ATF3,SPP1,FGFR1,NR2C2,BACE1,FN3K,GPAT4,C5,PANK1,NPC1,IGF2,UGP2 ,GYG1,SLC37A4,SIRT1,IGFBP3,NCOA1,PLCB3,CD14,Gm15807/Hmgn5,FITM2,PDK2,SDS,CCDC80,SFTPD,PC,PDGFA,PIGL,PPP1CB,ATF6,BCL2,AL DH2,ANXA1,PRKAA2,EGLN3,GNMT,MMP12,PLSCR1,Mup1 (includes others),DPP4,HYAL1,ST3GAL6,SGMS2,FGF1,PPP1R3B,GNAI2,EXOC4,NUCB2,PLPP2,ACSL1                                                                                                                                                                                                                                                                                                                                                                                   |
| Lipid Metabolism        | 1KI tumor genes  | 3.29E-05    | IDI1,CAV2,QKI,F2R,CLDN7,HMGCS2,RBP1,Akr1b7,CXCL10,MYC,SCNN1A,SH3YL1,B4GALNT1,TBC1D4,SPTLC2,LPL,RDH16,CXCL14,CAV1,ADA,AB CB11,GPC1,GSTK1,PITPNB,AMACR,ACSL3,SPP1,FFAR4,CIDECA,AFP,VLDLR,LONP2,ACADS,PANK1,IGF2,AKR1D1,CPT2,PTGER2,PDK2,CYP4A11, SQLE,DECR1,PIGP,PDGFA,PIGL,PGAP1,COL4A3,GDF15,HEXA,E2F3,KLB,ACAA2,SIRT4,LIPA,TRIB1,JUN,ANGPTL4,SLC10A2,ANXA5,DECR2,HPGD ,MTM1,IGHM,ACSL4,PARK2,MMP12,IFRD1,SMPD3,CYP51A1,DPP4,NSDHL,ENTPD1,PCOLCE2,Scd2,VIM,Cyp2c54 (includes others),BAX,Slco1a4,RETSAT,Cyp4f16/Cyp4f37,ASPA,PCCA,TLR5,S100A9,DLAT,CDKN1A,NUCB2,SLC1A2,G6PC,PLEKHA1,P2RX7,ACSL1,PPARGC1 A                                                                                                                                                                                                                                                                                                                                                                                                                                                                                                                                                                                                                                                   |
| Lipid Metabolism        | 3bKI tumor genes | 2.64E-07    | ABCG8,SIK3,MYH9,HSD17B13,BMP4,APOB,DDX25,ABAT,Akap9,XDH,CP,KPNA1,ADRB3,HSD17B8,Akr1b7,ABCC6,SCNN1A,ATXN2,RB1,ESRRG,AL DH1L1,BCAT2,APCS,VAMP3,CELA3B,LSS,AMACR,ACAA1,VLDLR,CSF2RB,SCP2,UBR1,Acot1,CYP2B6,ACOT9,DHRS4,PRDX2,HSD17B10,KLF15,SQ LE,DECR1,CYP4F8,SLC10A1,KCNE3,PGAP1,PPP1R3C,COL4A3,MVK,GDF15,HEXA,IGFBP7,ANPEP,TGM2,LIPA,AR,JUN,PDE3B,ANXA5,FABP5,SOR T1,PDCD6IP,SMPD3,CYP51A1,ALDH5A1,PLAT,STX12,NSDHL,SLC25A13,UCP2,RDH11,ACOX1,SLC6A6,MAPK8,VIM,Cyp2c54 (includes others),RETSAT,ASPA,Ces1e,FGF21,B4GALT6,CLEC7A,LDLR,CDKN1A,NR5A2,PSAP,ABCC3,TCF7L2,PPARGC1A,MVD,HSD3B1,PRPF19,LGALS3,E PHX2,SPHK2,NUS1,TAF10,CLDN7,HMGCS2,TMEM30A,RARG,B3GALT1,RBP1,Cyp2j5,TSC22D3,PTEN,CXCL3,FDFT1,B4GALNT1,TBC1D4,CYP1A2,A DGRF5,SMPD4,RUNX2,RORA,ECI2,LPL,CXCL14,CHPT1,ABCB11,GPC1,CEACAM1,SLCO1B3,PDK4,MFSD2A,RPS6KB1,GLA,SPP1,ATF3,LCN2,NR2C 2,AFP,GPAT4,C5,PANK1,NPC1,IGF2,SIRT1,SLC37A4,CPT2,NCOA1,PLCB3,CD14,CCNY,FITM2,PDK2,CCDC80,PPAT,SFTPD,PDGFA,PIGL,SLC13A5, TERT,ATF6,APOC2,GCDH,TGIF1,BCL2,DHCR7,LYST,TIMP1,ANXA1,SAA1,DECR2,PRKAA2,HPGD,OPA1,CYGB,IGHM,LRPPRC,GNMT,PDK1,MMP12, PLSCR1,Mup1 (includes others),DPP4,Slco1a1,ABCD3,ACADSB,SGMS2,ACSM3,FGF1,Cyp4f16/Cyp4f37,FDPS,LOC102724788/PRODH,LPCAT1,ACAT1,NUCB2,Sf1,PLPP2,PT GR2,ACSL1 |

## Supplemental Table 11. E2F1 and/or E2FB HCC upregulated targets

| Regulated by | Gene symbol | Entrez Gene Name                                                                             | Location        | Type                    |
|--------------|-------------|----------------------------------------------------------------------------------------------|-----------------|-------------------------|
| E2F1         | ACSL3       | acyl-CoA synthetase long-chain family member 3                                               | Cytoplasm       | enzyme                  |
| E2F1         | ALCAM       | activated leukocyte cell adhesion molecule                                                   | Plasma Membrane | other                   |
| E2F1         | ATXN2L      | ataxin 2-like                                                                                | Nucleus         | other                   |
| E2F1         | AURKA       | aurora kinase A                                                                              | Nucleus         | kinase                  |
| E2F1         | BIRC5       | baculoviral IAP repeat containing 5                                                          | Cytoplasm       | other                   |
| E2F1         | CAMK2N2     | calcium/calmodulin-dependent protein kinase II inhibitor 2                                   | Nucleus         | other                   |
| E2F1         | CCNA2       | cyclin A2                                                                                    | Nucleus         | other                   |
| E2F1         | CCNE1       | cyclin E1                                                                                    | Nucleus         | transcription regulator |
| E2F1         | CDC6        | cell division cycle 6                                                                        | Nucleus         | other                   |
| E2F1         | CDCA5       | cell division cycle associated 5                                                             | Cytoplasm       | other                   |
| E2F1         | CDK1        | cyclin-dependent kinase 1                                                                    | Nucleus         | kinase                  |
| E2F1         | CEP55       | centrosomal protein 55kDa                                                                    | Cytoplasm       | other                   |
| E2F1         | CHEK1       | checkpoint kinase 1                                                                          | Nucleus         | kinase                  |
| E2F1         | CKAP2       | cytoskeleton associated protein 2                                                            | Cytoplasm       | other                   |
| E2F1         | CKS1B       | CDC28 protein kinase regulatory subunit 1B                                                   | Other           | kinase                  |
| E2F1         | DDX50       | DEAD (Asp-Glu-Ala-Asp) box polypeptide 50                                                    | Nucleus         | enzyme                  |
| E2F1         | DEPDC1B     | DEP domain containing 1B                                                                     | Cytoplasm       | other                   |
| E2F1         | DUSP6       | dual specificity phosphatase 6                                                               | Cytoplasm       | phosphatase             |
| E2F1         | E2F3        | E2F transcription factor 3                                                                   | Nucleus         | transcription regulator |
| E2F1         | GAS2L3      | growth arrest-specific 2 like 3                                                              | Other           | other                   |
| E2F1         | GJA1        | gap junction protein, alpha 1, 43kDa                                                         | Plasma Membrane | transporter             |
| E2F1         | HELLS       | helicase, lymphoid-specific                                                                  | Nucleus         | enzyme                  |
| E2F1         | HEXA        | hexosaminidase A (alpha polypeptide)                                                         | Cytoplasm       | enzyme                  |
| E2F1         | HIST1H4A    | histone cluster 1, H4a                                                                       | Nucleus         | other                   |
| E2F1         | HIVEP2      | human immunodeficiency virus type I enhancer binding protein 2                               | Nucleus         | transcription regulator |
| E2F1         | IDI1        | isopentenyl-diphosphate delta isomerase 1                                                    | Cytoplasm       | enzyme                  |
| E2F1         | IFRD1       | interferon-related developmental regulator 1                                                 | Nucleus         | other                   |
| E2F1         | MDM2        | MDM2 proto-oncogene, E3 ubiquitin protein ligase                                             | Nucleus         | transcription regulator |
| E2F1         | MYC         | v-myc avian myelocytomatosis viral oncogene homolog                                          | Nucleus         | transcription regulator |
| E2F1         | MYEF2       | myelin expression factor 2                                                                   | Nucleus         | transcription regulator |
| E2F1         | NFE2L2      | nuclear factor, erythroid 2-like 2                                                           | Nucleus         | transcription regulator |
| E2F1         | NOP58       | NOP58 ribonucleoprotein                                                                      | Nucleus         | enzyme                  |
| E2F1         | PAPSS1      | 3'-phosphoadenosine 5'-phosphosulfate synthase 1                                             | Cytoplasm       | enzyme                  |
| E2F1         | PBK         | PDZ binding kinase                                                                           | Cytoplasm       | kinase                  |
| E2F1         | PBX3        | pre-B-cell leukemia homeobox 3                                                               | Nucleus         | transcription regulator |
| E2F1         | PIGP        | phosphatidylinositol glycan anchor biosynthesis, class P                                     | Cytoplasm       | enzyme                  |
| E2F1         | PLEKHA1     | pleckstrin homology domain containing, family A (phosphoinositide binding specific) member 1 | Cytoplasm       | other                   |
| E2F1         | PVR         | poliovirus receptor                                                                          | Plasma Membrane | other                   |
| E2F1         | RAD18       | RAD18 E3 ubiquitin protein ligase                                                            | Nucleus         | other                   |
| E2F1         | RAD51       | RAD51 recombinase                                                                            | Nucleus         | enzyme                  |

## Supplemental Table 11. E2F1 and/or E2FB HCC upregulated targets

| Regulated by | Gene symbol | Entrez Gene Name                                           | Location            | Type                    |
|--------------|-------------|------------------------------------------------------------|---------------------|-------------------------|
| E2F1         | RHOB        | ras homolog family member B                                | Cytoplasm           | enzyme                  |
| E2F1         | SHCBP1      | SHC SH2-domain binding protein 1                           | Other               | other                   |
| E2F1         | SLC20A1     | solute carrier family 20 (phosphate transporter), member 1 | Plasma Membrane     | transporter             |
| E2F1         | SMC4        | structural maintenance of chromosomes 4                    | Nucleus             | transporter             |
| E2F1         | SPATS2      | spermatogenesis associated, serine-rich 2                  | Cytoplasm           | other                   |
| E2F1         | STMN1       | stathmin 1                                                 | Cytoplasm           | other                   |
| E2F1         | TACC3       | transforming, acidic coiled-coil containing protein 3      | Nucleus             | other                   |
| E2F1         | TOP2A       | topoisomerase (DNA) II alpha 170kDa                        | Nucleus             | enzyme                  |
| E2F1         | TRIB1       | tribbles pseudokinase 1                                    | Cytoplasm           | kinase                  |
| E2F1         | UHRF1       | ubiquitin-like with PHD and ring finger domains 1          | Nucleus             | transcription regulator |
| E2F1         | WWTR1       | WW domain containing transcription regulator 1             | Nucleus             | transcription regulator |
| E2F1;E2F3B   | BTG2        | BTG family, member 2                                       | Nucleus             | transcription regulator |
| E2F1;E2F3B   | CDKN1A      | cyclin-dependent kinase inhibitor 1A (p21, Cip1)           | Nucleus             | kinase                  |
| E2F1;E2F3B   | EGR2        | early growth response 2                                    | Nucleus             | transcription regulator |
| E2F1;E2F3B   | EXOC4       | exocyst complex component 4                                | Cytoplasm           | transporter             |
| E2F1;E2F3B   | JUND        | jun D proto-oncogene                                       | Nucleus             | transcription regulator |
| E2F1;E2F3B   | LGALS1      | lectin, galactoside-binding, soluble, 1                    | Extracellular Space | other                   |
| E2F1;E2F3B   | PHLDA3      | pleckstrin homology-like domain, family A, member 3        | Plasma Membrane     | other                   |
| E2F1;E2F3B   | RRBP1       | ribosome binding protein 1                                 | Cytoplasm           | other                   |
| E2F1;E2F3B   | TMEM43      | transmembrane protein 43                                   | Nucleus             | other                   |
| E2F1;E2F3B   | TUBB6       | tubulin, beta 6 class V                                    | Cytoplasm           | other                   |
| E2F1;E2F3B   | UNC5B       | unc-5 netrin receptor B                                    | Plasma Membrane     | transmembrane receptor  |
| E2F3B        | ABRACL      | ABRA C-terminal like                                       | Other               | other                   |
| E2F3B        | ACTB        | actin, beta                                                | Cytoplasm           | other                   |
| E2F3B        | ADPRH       | ADP-ribosylarginine hydrolase                              | Other               | enzyme                  |
| E2F3B        | AGO2        | argonaute RISC catalytic component 2                       | Cytoplasm           | translation regulator   |
| E2F3B        | ARSG        | arylsulfatase G                                            | Cytoplasm           | enzyme                  |
| E2F3B        | ATP2B1      | ATPase, Ca <sup>++</sup> transporting, plasma membrane 1   | Plasma Membrane     | transporter             |
| E2F3B        | CAPG        | capping protein (actin filament), gelsolin-like            | Nucleus             | other                   |
| E2F3B        | CDKN3       | cyclin-dependent kinase inhibitor 3                        | Cytoplasm           | phosphatase             |
| E2F3B        | CENPM       | centromere protein M                                       | Cytoplasm           | other                   |
| E2F3B        | COL4A1      | collagen, type IV, alpha 1                                 | Extracellular Space | other                   |
| E2F3B        | COL6A3      | collagen, type VI, alpha 3                                 | Extracellular Space | other                   |
| E2F3B        | CSRP1       | cysteine and glycine-rich protein 1                        | Nucleus             | other                   |
| E2F3B        | CTGF        | connective tissue growth factor                            | Extracellular Space | growth factor           |
| E2F3B        | CYP51A1     | cytochrome P450, family 51, subfamily A, polypeptide 1     | Cytoplasm           | enzyme                  |
| E2F3B        | CYR61       | cysteine-rich, angiogenic inducer, 61                      | Extracellular Space | other                   |
| E2F3B        | DDR1        | discoidin domain receptor tyrosine kinase 1                | Plasma Membrane     | kinase                  |
| E2F3B        | DLGAP5      | discs, large (Drosophila) homolog-associated protein 5     | Nucleus             | phosphatase             |

## Supplemental Table 11. E2F1 and/or E2FB HCC upregulated targets

| Regulated by | Gene symbol | Entrez Gene Name                                                                        | Location            | Type                    |
|--------------|-------------|-----------------------------------------------------------------------------------------|---------------------|-------------------------|
| E2F3B        | EIF4EBP2    | eukaryotic translation initiation factor 4E binding protein 2                           | Cytoplasm           | translation regulator   |
| E2F3B        | FAAP20      | Fanconi anemia core complex associated protein 20                                       | Nucleus             | other                   |
| E2F3B        | FDFT1       | farnesyl-diphosphate farnesyltransferase 1                                              | Cytoplasm           | enzyme                  |
| E2F3B        | FDPS        | farnesyl diphosphate synthase                                                           | Cytoplasm           | enzyme                  |
| E2F3B        | FGFR1       | fibroblast growth factor receptor 1                                                     | Plasma Membrane     | kinase                  |
| E2F3B        | FNDC3B      | fibronectin type III domain containing 3B                                               | Cytoplasm           | other                   |
| E2F3B        | GNAI2       | guanine nucleotide binding protein (G protein), alpha inhibiting activity polypeptide 2 | Plasma Membrane     | other                   |
| E2F3B        | HAUS8       | HAUS augmin-like complex, subunit 8                                                     | Cytoplasm           | other                   |
| E2F3B        | HBEGF       | heparin-binding EGF-like growth factor                                                  | Extracellular Space | growth factor           |
| E2F3B        | IQGAP1      | IQ motif containing GTPase activating protein 1                                         | Cytoplasm           | other                   |
| E2F3B        | JAG1        | jagged 1                                                                                | Extracellular Space | growth factor           |
| E2F3B        | KLF6        | Kruppel-like factor 6                                                                   | Nucleus             | transcription regulator |
| E2F3B        | LASP1       | LIM and SH3 protein 1                                                                   | Cytoplasm           | transporter             |
| E2F3B        | LIPT2       | lipoyl(octanoyl) transferase 2 (putative)                                               | Cytoplasm           | other                   |
| E2F3B        | LOXL1       | lysyl oxidase-like 1                                                                    | Extracellular Space | enzyme                  |
| E2F3B        | LYSMD2      | LysM, putative peptidoglycan-binding, domain containing 2                               | Other               | other                   |
| E2F3B        | MYH9        | myosin, heavy chain 9, non-muscle                                                       | Cytoplasm           | enzyme                  |
| E2F3B        | NRM         | nurim (nuclear envelope membrane protein)                                               | Nucleus             | other                   |
| E2F3B        | PDAP1       | PDGFA associated protein 1                                                              | Cytoplasm           | other                   |
| E2F3B        | PDGFA       | platelet-derived growth factor alpha polypeptide                                        | Extracellular Space | growth factor           |
| E2F3B        | PDLIM1      | PDZ and LIM domain 1                                                                    | Cytoplasm           | transcription regulator |
| E2F3B        | PLAT        | plasminogen activator, tissue                                                           | Extracellular Space | peptidase               |
| E2F3B        | PRDX2       | peroxiredoxin 2                                                                         | Cytoplasm           | enzyme                  |
| E2F3B        | PSAP        | prosaposin                                                                              | Extracellular Space | other                   |
| E2F3B        | PVT1        | Pvt1 oncogene (non-protein coding)                                                      | Other               | other                   |
| E2F3B        | RAB5C       | RAB5C, member RAS oncogene family                                                       | Cytoplasm           | enzyme                  |
| E2F3B        | SAE1        | SUMO1 activating enzyme subunit 1                                                       | Cytoplasm           | enzyme                  |
| E2F3B        | SAMD4A      | sterile alpha motif domain containing 4A                                                | Cytoplasm           | translation regulator   |
| E2F3B        | SECISBP2    | SECIS binding protein 2                                                                 | Cytoplasm           | translation regulator   |
| E2F3B        | SEPT11      | septin 11                                                                               | Nucleus             | other                   |
| E2F3B        | SF1         | splicing factor 1                                                                       | Nucleus             | transcription regulator |
| E2F3B        | SLC35A5     | solute carrier family 35, member A5                                                     | Other               | transporter             |
| E2F3B        | SLC35C1     | solute carrier family 35 (GDP-fucose transporter), member C1                            | Cytoplasm           | transporter             |
| E2F3B        | SOX4        | SRY (sex determining region Y)-box 4                                                    | Nucleus             | transcription regulator |
| E2F3B        | SP4         | Sp4 transcription factor                                                                | Nucleus             | transcription regulator |
| E2F3B        | SQLE        | squalene epoxidase                                                                      | Cytoplasm           | enzyme                  |
| E2F3B        | SRXN1       | sulfiredoxin 1                                                                          | Cytoplasm           | enzyme                  |
| E2F3B        | TIMP1       | TIMP metalloproteinase inhibitor 1                                                      | Extracellular Space | cytokine                |
| E2F3B        | TOB1        | transducer of ERBB2, 1                                                                  | Nucleus             | transcription regulator |
| E2F3B        | TUBB4B      | tubulin, beta 4B class IVb                                                              | Cytoplasm           | other                   |
| E2F3B        | UAP1L1      | UDP-N-acetylglucosamine pyrophosphorylase 1 like 1                                      | Other               | other                   |
| E2F3B        | UBE2S       | ubiquitin-conjugating enzyme E2S                                                        | Nucleus             | enzyme                  |

## Supplemental Table 11. E2F1 and/or E2FB HCC upregulated targets

| Regulated by | Gene symbol | Entrez Gene Name                                                             | Location        | Type   |
|--------------|-------------|------------------------------------------------------------------------------|-----------------|--------|
| E2F3B        | VAMP3       | vesicle-associated membrane protein 3                                        | Plasma Membrane | other  |
| E2F3B        | WDFY3       | WD repeat and FYVE domain containing 3                                       | Cytoplasm       | enzyme |
| E2F3B        | YWHAZ       | tyrosine 3-monooxygenase/tryptophan 5-monooxygenase activation protein, zeta | Cytoplasm       | enzyme |
| E2F3B        | ZC3HAV1     | zinc finger CCCH-type, antiviral 1                                           | Plasma Membrane | other  |
| E2F3B        | ZDHHC14     | zinc finger, DHHC-type containing 14                                         | Cytoplasm       | enzyme |
| E2F3B        | ZFP280D     | zinc finger protein 280D                                                     | Other           | other  |



## Supplemental Table 12. E2F1 and/or E2FB HCC downregulated targets

| Regulated by | Gene symbol   | Entrez Gene Name                                                                 | Location            | Type                       |
|--------------|---------------|----------------------------------------------------------------------------------|---------------------|----------------------------|
| E2F1         | BAG4          | BCL2-associated athanogene 4                                                     | Cytoplasm           | other                      |
| E2F1         | DLST          | dihydrolipoamide S-succinyltransferase (E2 component of 2-oxo-glutarate complex) | Cytoplasm           | enzyme                     |
| E2F1         | GYPC          | glycophorin C (Gerbich blood group)                                              | Plasma Membrane     | other                      |
| E2F1         | PANK1         | pantothenate kinase 1                                                            | Cytoplasm           | kinase                     |
| E2F1         | PCOLCE2       | procollagen C-endopeptidase enhancer 2                                           | Extracellular Space | other                      |
| E2F1         | POLG2         | polymerase (DNA directed), gamma 2, accessory subunit                            | Cytoplasm           | enzyme                     |
| E2F1         | RFX4          | regulatory factor X, 4 (influences HLA class II expression)                      | Nucleus             | transcription regulator    |
| E2F1         | RPRD2         | regulation of nuclear pre-mRNA domain containing 2                               | Other               | other                      |
| E2F1         | SCO2          | SCO2 cytochrome c oxidase assembly protein                                       | Cytoplasm           | other                      |
| E2F1         | SDC1          | syndecan 1                                                                       | Plasma Membrane     | enzyme                     |
| E2F1         | SHMT1         | serine hydroxymethyltransferase 1 (soluble)                                      | Cytoplasm           | enzyme                     |
| E2F1         | SLC29A1       | solute carrier family 29 (equilibrative nucleoside transporter), member 1        | Plasma Membrane     | transporter                |
| E2F1         | ZFP213        | zinc finger protein 213                                                          | Nucleus             | transcription regulator    |
| E2F1         | ZFP784        | zinc finger protein 784                                                          | Other               | other                      |
| E2F1;E2F3B   | ALDH4A1       | aldehyde dehydrogenase 4 family, member A1                                       | Cytoplasm           | enzyme                     |
| E2F1;E2F3B   | ALS2          | amyotrophic lateral sclerosis 2 (juvenile)                                       | Cytoplasm           | other                      |
| E2F1;E2F3B   | DLEU2         | deleted in lymphocytic leukemia 2 (non-protein coding)                           | Other               | other                      |
| E2F1;E2F3B   | MACROD1       | MACRO domain containing 1                                                        | Cytoplasm           | enzyme                     |
| E2F1;E2F3B   | NRP2          | neuropilin 2                                                                     | Plasma Membrane     | kinase                     |
| E2F3B        | 1600002H07RIK | RIKEN cDNA 1600002H07 gene                                                       | Other               | other                      |
| E2F3B        | 1810014B01RIK | RIKEN cDNA 1810014B01RIK gene                                                    | Other               | other                      |
| E2F3B        | 4831440E17RIK | RIKEN cDNA 4831440E17RIK gene                                                    | Other               | other                      |
| E2F3B        | 4930581F22RIK | RIKEN cDNA 4930581F22RIK gene                                                    | Other               | other                      |
| E2F3B        | ABCD3         | ATP-binding cassette, sub-family D (ALD), member 3                               | Cytoplasm           | transporter                |
| E2F3B        | ACAT1         | acetyl-CoA acetyltransferase 1                                                   | Cytoplasm           | enzyme                     |
| E2F3B        | ACSL1         | acyl-CoA synthetase long-chain family member 1                                   | Cytoplasm           | enzyme                     |
| E2F3B        | ACY1          | aminoacylase 1                                                                   | Cytoplasm           | peptidase                  |
| E2F3B        | ADGRF5        | adhesion G protein-coupled receptor F5                                           | Plasma Membrane     | G-protein coupled receptor |
| E2F3B        | ADK           | adenosine kinase                                                                 | Nucleus             | kinase                     |
| E2F3B        | ADRB3         | adrenoceptor beta 3                                                              | Plasma Membrane     | G-protein coupled receptor |
| E2F3B        | AFMID         | arylformamidase                                                                  | Nucleus             | enzyme                     |
| E2F3B        | AGBL3         | ATP/GTP binding protein-like 3                                                   | Other               | peptidase                  |
| E2F3B        | AGFG2         | ArfGAP with FG repeats 2                                                         | Other               | other                      |
| E2F3B        | AGPAT6        | 1-acylglycerol-3-phosphate O-acyltransferase 6                                   | Cytoplasm           | enzyme                     |

## Supplemental Table 12. E2F1 and/or E2FB HCC downregulated targets

| Regulated by | Gene symbol | Entrez Gene Name                                      | Location        | Type                    |
|--------------|-------------|-------------------------------------------------------|-----------------|-------------------------|
| E2F3B        | AHCTF1      | AT hook containing transcription factor 1             | Nucleus         | transcription regulator |
| E2F3B        | AHCY        | adenosylhomocysteinase                                | Cytoplasm       | enzyme                  |
| E2F3B        | AI314180    | KIAA0368                                              | Cytoplasm       | other                   |
| E2F3B        | AKAP1       | A kinase (PRKA) anchor protein 1                      | Cytoplasm       | other                   |
| E2F3B        | AKAP8       | A kinase (PRKA) anchor protein 8                      | Nucleus         | other                   |
| E2F3B        | ALDH7A1     | aldehyde dehydrogenase 7 family, member A1            | Cytoplasm       | enzyme                  |
| E2F3B        | AMIGO1      | adhesion molecule with Ig-like domain 1               | Plasma Membrane | other                   |
| E2F3B        | AP2B1       | adaptor-related protein complex 2, beta 1 subunit     | Plasma Membrane | transporter             |
| E2F3B        | AP3M1       | adaptor-related protein complex 3, mu 1 subunit       | Cytoplasm       | transporter             |
| E2F3B        | AP5M1       | adaptor-related protein complex 5, mu 1 subunit       | Cytoplasm       | other                   |
| E2F3B        | ARHGAP5     | Rho GTPase activating protein 5                       | Cytoplasm       | enzyme                  |
| E2F3B        | ARIH1       | ariadne RBR E3 ubiquitin protein ligase 1             | Cytoplasm       | enzyme                  |
| E2F3B        | ARRDC3      | arrestin domain containing 3                          | Plasma Membrane | other                   |
| E2F3B        | ATF6        | activating transcription factor 6                     | Cytoplasm       | transcription regulator |
| E2F3B        | B3GALNT2    | beta-1,3-N-acetylgalactosaminyltransferase 2          | Cytoplasm       | enzyme                  |
| E2F3B        | BAZ1B       | bromodomain adjacent to zinc finger domain, 1B        | Nucleus         | transcription regulator |
| E2F3B        | BIRC6       | baculoviral IAP repeat containing 6                   | Cytoplasm       | enzyme                  |
| E2F3B        | CAND1       | cullin-associated and neddylation-dissociated 1       | Cytoplasm       | transcription regulator |
| E2F3B        | CCP110      | centriolar coiled coil protein 110kDa                 | Cytoplasm       | other                   |
| E2F3B        | CDKN2AIP    | CDKN2A interacting protein                            | Nucleus         | transcription regulator |
| E2F3B        | CHD9        | chromodomain helicase DNA binding protein 9           | Cytoplasm       | other                   |
| E2F3B        | CNOT6L      | CCR4-NOT transcription complex, subunit 6-like        | Cytoplasm       | enzyme                  |
| E2F3B        | COPG2       | coatomer protein complex, subunit gamma 2             | Cytoplasm       | transporter             |
| E2F3B        | CUTC        | cutC copper transporter                               | Cytoplasm       | other                   |
| E2F3B        | D15ERTD621E | DNA segment, Chr 15, ERATO Doi 621, expressed         | Other           | other                   |
| E2F3B        | DANCR       | differentiation antagonizing non-protein coding RNA   | Other           | other                   |
| E2F3B        | DDI2        | DNA-damage inducible 1 homolog 2                      | Plasma Membrane | transporter             |
| E2F3B        | DPY19L1     | dpy-19-like 1 (C. elegans)                            | Other           | other                   |
| E2F3B        | EIF3A       | eukaryotic translation initiation factor 3, subunit A | Cytoplasm       | other                   |
| E2F3B        | EIF4G1      | eukaryotic translation initiation factor 4 gamma, 1   | Cytoplasm       | translation regulator   |
| E2F3B        | ELF1        | E74-like factor 1 (ets domain transcription factor)   | Nucleus         | transcription regulator |
| E2F3B        | EPHB6       | EPH receptor B6                                       | Plasma Membrane | kinase                  |

## Supplemental Table 12. E2F1 and/or E2FB HCC downregulated targets

| Regulated by | Gene symbol | Entrez Gene Name                                                                               | Location            | Type                    |
|--------------|-------------|------------------------------------------------------------------------------------------------|---------------------|-------------------------|
| E2F3B        | ERCC6L2     | excision repair cross-complementation group 6-like 2                                           | Other               | enzyme                  |
| E2F3B        | FBXO21      | F-box protein 21                                                                               | Extracellular Space | enzyme                  |
| E2F3B        | FBXO30      | F-box protein 30                                                                               | Extracellular Space | other                   |
| E2F3B        | GCN1        | GCN1 eIF2 alpha kinase activator homolog                                                       | Cytoplasm           | translation regulator   |
| E2F3B        | GDE1        | glycerophosphodiester phosphodiesterase 1                                                      | Plasma Membrane     | enzyme                  |
| E2F3B        | GGNBP2      | gametogenetin binding protein 2                                                                | Other               | other                   |
| E2F3B        | GM5617      | predicted gene 5617                                                                            | Other               | other                   |
| E2F3B        | GM608       | predicted gene 608                                                                             | Other               | other                   |
| E2F3B        | GPHN        | gephyrin                                                                                       | Plasma Membrane     | enzyme                  |
| E2F3B        | GSPT1       | G1 to S phase transition 1                                                                     | Cytoplasm           | translation regulator   |
| E2F3B        | GTF2I       | general transcription factor Iii                                                               | Nucleus             | transcription regulator |
| E2F3B        | GTF3C2      | general transcription factor IIIC, polypeptide 2, beta 110kDa                                  | Nucleus             | transcription regulator |
| E2F3B        | GTPBP10     | GTP-binding protein 10 (putative)                                                              | Cytoplasm           | other                   |
| E2F3B        | HERPUD1     | homocysteine-inducible, endoplasmic reticulum stress-inducible, ubiquitin-like domain member 1 | Cytoplasm           | other                   |
| E2F3B        | HIPK1       | homeodomain interacting protein kinase 1                                                       | Nucleus             | kinase                  |
| E2F3B        | HNRNPD      | heterogeneous nuclear ribonucleoprotein D (AU-rich element RNA binding protein 1, 37kDa)       | Nucleus             | transcription regulator |
| E2F3B        | HNRNPR      | heterogeneous nuclear ribonucleoprotein R                                                      | Nucleus             | other                   |
| E2F3B        | HSPA4       | heat shock 70kDa protein 4                                                                     | Cytoplasm           | other                   |
| E2F3B        | IPMK        | inositol polyphosphate multikinase                                                             | Nucleus             | kinase                  |
| E2F3B        | IREB2       | iron-responsive element binding protein 2                                                      | Cytoplasm           | translation regulator   |
| E2F3B        | KIF13A      | kinesin family member 13A                                                                      | Cytoplasm           | transporter             |
| E2F3B        | KIF1B       | kinesin family member 1B                                                                       | Cytoplasm           | transporter             |
| E2F3B        | KPNA1       | karyopherin alpha 1 (importin alpha 5)                                                         | Nucleus             | transporter             |
| E2F3B        | LACTB       | lactamase, beta                                                                                | Cytoplasm           | other                   |
| E2F3B        | LATS2       | large tumor suppressor kinase 2                                                                | Nucleus             | kinase                  |
| E2F3B        | LPP         | LIM domain containing preferred translocation partner in lipoma                                | Nucleus             | other                   |
| E2F3B        | LYST        | lysosomal trafficking regulator                                                                | Cytoplasm           | transporter             |
| E2F3B        | MAPK1IP1L   | mitogen-activated protein kinase 1 interacting protein 1-like                                  | Nucleus             | other                   |
| E2F3B        | MARCH5      | membrane-associated ring finger (C3HC4) 5                                                      | Cytoplasm           | enzyme                  |
| E2F3B        | MARVELD1    | MARVEL domain containing 1                                                                     | Other               | other                   |
| E2F3B        | MCCC1       | methylcrotonoyl-CoA carboxylase 1 (alpha)                                                      | Cytoplasm           | enzyme                  |
| E2F3B        | MCCC2       | methylcrotonoyl-CoA carboxylase 2 (beta)                                                       | Cytoplasm           | enzyme                  |
| E2F3B        | MCM10       | minichromosome maintenance complex component 10                                                | Nucleus             | other                   |
| E2F3B        | MEMO1       | mediator of cell motility 1                                                                    | Cytoplasm           | other                   |

## Supplemental Table 12. E2F1 and/or E2FB HCC downregulated targets

| Regulated by | Gene symbol | Entrez Gene Name                                                                                                                        | Location        | Type                    |
|--------------|-------------|-----------------------------------------------------------------------------------------------------------------------------------------|-----------------|-------------------------|
| E2F3B        | MON2        | MON2 homolog, regulator of endosome-to-Golgi trafficking                                                                                | Cytoplasm       | other                   |
| E2F3B        | MSH3        | mutS homolog 3                                                                                                                          | Nucleus         | enzyme                  |
| E2F3B        | MTHFD1      | methylenetetrahydrofolate dehydrogenase (NADP+ dependent) 1, methenyltetrahydrofolate cyclohydrolase, formyltetrahydrofolate synthetase | Cytoplasm       | enzyme                  |
| E2F3B        | MTMR4       | myotubularin related protein 4                                                                                                          | Cytoplasm       | phosphatase             |
| E2F3B        | MTO1        | mitochondrial tRNA translation optimization 1                                                                                           | Cytoplasm       | enzyme                  |
| E2F3B        | MTRR        | 5-methyltetrahydrofolate-homocysteine methyltransferase reductase                                                                       | Cytoplasm       | enzyme                  |
| E2F3B        | NAA16       | N(alpha)-acetyltransferase 16, NatA auxiliary subunit                                                                                   | Nucleus         | enzyme                  |
| E2F3B        | NASP        | nuclear autoantigenic sperm protein (histone-binding)                                                                                   | Nucleus         | other                   |
| E2F3B        | NAV2        | neuron navigator 2                                                                                                                      | Nucleus         | other                   |
| E2F3B        | NEO1        | neogenin 1                                                                                                                              | Plasma Membrane | transcription regulator |
| E2F3B        | NFIB        | nuclear factor I/B                                                                                                                      | Nucleus         | transcription regulator |
| E2F3B        | NFIX        | nuclear factor I/X (CCAAT-binding transcription factor)                                                                                 | Nucleus         | transcription regulator |
| E2F3B        | NOL7        | nucleolar protein 7, 27kDa                                                                                                              | Nucleus         | other                   |
| E2F3B        | NUP153      | nucleoporin 153kDa                                                                                                                      | Nucleus         | transporter             |
| E2F3B        | NXT2        | nuclear transport factor 2-like export factor 2                                                                                         | Nucleus         | transporter             |
| E2F3B        | PA2G4       | proliferation-associated 2G4, 38kDa                                                                                                     | Nucleus         | transcription regulator |
| E2F3B        | PABPC1      | poly(A) binding protein, cytoplasmic 1                                                                                                  | Cytoplasm       | translation regulator   |
| E2F3B        | PAICS       | phosphoribosylaminoimidazole carboxylase, phosphoribosylaminoimidazole succinocarboxamide synthetase                                    | Cytoplasm       | enzyme                  |
| E2F3B        | PAN3        | PAN3 poly(A) specific ribonuclease subunit                                                                                              | Cytoplasm       | other                   |
| E2F3B        | PDK1        | pyruvate dehydrogenase kinase, isozyme 1                                                                                                | Cytoplasm       | kinase                  |
| E2F3B        | PDP2        | pyruvate dehydrogenase phosphatase catalytic subunit 2                                                                                  | Cytoplasm       | phosphatase             |
| E2F3B        | PEBP1       | phosphatidylethanolamine binding protein 1                                                                                              | Cytoplasm       | other                   |
| E2F3B        | PHLPP1      | PH domain and leucine rich repeat protein phosphatase 1                                                                                 | Cytoplasm       | enzyme                  |
| E2F3B        | PIH1D1      | PIH1 domain containing 1                                                                                                                | Other           | other                   |
| E2F3B        | PPP1CB      | protein phosphatase 1, catalytic subunit, beta isozyme                                                                                  | Cytoplasm       | phosphatase             |
| E2F3B        | PPP2R3A     | protein phosphatase 2, regulatory subunit B", alpha                                                                                     | Nucleus         | phosphatase             |
| E2F3B        | PRPF19      | pre-mRNA processing factor 19                                                                                                           | Nucleus         | other                   |
| E2F3B        | PRPF4B      | pre-mRNA processing factor 4B                                                                                                           | Nucleus         | kinase                  |

## Supplemental Table 12. E2F1 and/or E2FB HCC downregulated targets

| Regulated by | Gene symbol | Entrez Gene Name                                                                                  | Location        | Type                              |
|--------------|-------------|---------------------------------------------------------------------------------------------------|-----------------|-----------------------------------|
| E2F3B        | RAB2A       | RAB2A, member RAS oncogene family                                                                 | Cytoplasm       | enzyme                            |
| E2F3B        | RAD23B      | RAD23 homolog B, nucleotide excision repair protein                                               | Nucleus         | other                             |
| E2F3B        | RB1         | retinoblastoma 1                                                                                  | Nucleus         | transcription regulator           |
| E2F3B        | RBM33       | RNA binding motif protein 33                                                                      | Other           | other                             |
| E2F3B        | RBM39       | RNA binding motif protein 39                                                                      | Nucleus         | transcription regulator           |
| E2F3B        | RCL1        | RNA terminal phosphate cyclase-like 1                                                             | Nucleus         | enzyme                            |
| E2F3B        | RETSAT      | retinol saturase (all-trans-retinol 13,14-reductase)                                              | Cytoplasm       | enzyme                            |
| E2F3B        | RICTOR      | RPTOR independent companion of MTOR, complex 2                                                    | Cytoplasm       | other                             |
| E2F3B        | RIF1        | replication timing regulatory factor 1                                                            | Nucleus         | other                             |
| E2F3B        | RMND5A      | required for meiotic nuclear division 5 homolog A                                                 | Nucleus         | other                             |
| E2F3B        | RORA        | RAR-related orphan receptor A                                                                     | Nucleus         | ligand-dependent nuclear receptor |
| E2F3B        | SERBP1      | SERPINE1 mRNA binding protein 1                                                                   | Cytoplasm       | other                             |
| E2F3B        | SF3B2       | splicing factor 3b, subunit 2, 145kDa                                                             | Nucleus         | other                             |
| E2F3B        | SFPQ        | splicing factor proline/glutamine-rich                                                            | Nucleus         | other                             |
| E2F3B        | SIN3A       | SIN3 transcription regulator family member A                                                      | Nucleus         | transcription regulator           |
| E2F3B        | SLC15A4     | solute carrier family 15 (oligopeptide transporter), member 4                                     | Cytoplasm       | transporter                       |
| E2F3B        | SLC25A32    | solute carrier family 25 (mitochondrial folate carrier), member 32                                | Cytoplasm       | transporter                       |
| E2F3B        | SLC35A3     | solute carrier family 35 (UDP-N-acetylglucosamine (UDP-GlcNAc) transporter), member A3            | Cytoplasm       | transporter                       |
| E2F3B        | SLC35E3     | solute carrier family 35, member E3                                                               | Other           | other                             |
| E2F3B        | SMARCC1     | SWI/SNF related, matrix associated, actin dependent regulator of chromatin, subfamily c, member 1 | Nucleus         | transcription regulator           |
| E2F3B        | SMARCD2     | SWI/SNF related, matrix associated, actin dependent regulator of chromatin, subfamily d, member 2 | Nucleus         | transcription regulator           |
| E2F3B        | SMPD4       | sphingomyelin phosphodiesterase 4, neutral membrane (neutral sphingomyelinase-3)                  | Cytoplasm       | enzyme                            |
| E2F3B        | SOS1        | son of sevenless homolog 1 (Drosophila)                                                           | Cytoplasm       | other                             |
| E2F3B        | STARD7      | StAR-related lipid transfer (START) domain containing 7                                           | Other           | other                             |
| E2F3B        | STEAP2      | STEAP family member 2, metalloreductase                                                           | Plasma Membrane | transporter                       |
| E2F3B        | STK11IP     | serine/threonine kinase 11 interacting protein                                                    | Cytoplasm       | other                             |
| E2F3B        | STX12       | syntaxin 12                                                                                       | Cytoplasm       | other                             |
| E2F3B        | SYNCRIP     | synaptotagmin binding, cytoplasmic RNA interacting protein                                        | Nucleus         | other                             |

## Supplemental Table 12. E2F1 and/or E2FB HCC downregulated targets

| Regulated by | Gene symbol | Entrez Gene Name                                                                 | Location            | Type                    |
|--------------|-------------|----------------------------------------------------------------------------------|---------------------|-------------------------|
| E2F3B        | SYNE2       | spectrin repeat containing, nuclear envelope 2                                   | Nucleus             | other                   |
| E2F3B        | TAF10       | TAF10 RNA polymerase II, TATA box binding protein (TBP)-associated factor, 30kDa | Nucleus             | transcription regulator |
| E2F3B        | TAF15       | TAF15 RNA polymerase II, TATA box binding protein (TBP)-associated factor, 68kDa | Nucleus             | other                   |
| E2F3B        | TANGO2      | transport and golgi organization 2 homolog                                       | Cytoplasm           | other                   |
| E2F3B        | TAOK1       | TAO kinase 1                                                                     | Cytoplasm           | kinase                  |
| E2F3B        | TARDBP      | TAR DNA binding protein                                                          | Nucleus             | transcription regulator |
| E2F3B        | TBC1D4      | TBC1 domain family, member 4                                                     | Cytoplasm           | other                   |
| E2F3B        | TCF7L2      | transcription factor 7-like 2 (T-cell specific, HMG-box)                         | Nucleus             | transcription regulator |
| E2F3B        | TFDP2       | transcription factor Dp-2 (E2F dimerization partner 2)                           | Nucleus             | transcription regulator |
| E2F3B        | TGS1        | trimethylguanosine synthase 1                                                    | Nucleus             | enzyme                  |
| E2F3B        | TLE2        | transducin-like enhancer of split 2                                              | Nucleus             | transcription regulator |
| E2F3B        | TMEM245     | transmembrane protein 245                                                        | Other               | other                   |
| E2F3B        | TMTC3       | transmembrane and tetratricopeptide repeat containing 3                          | Other               | other                   |
| E2F3B        | TNPO1       | transportin 1                                                                    | Nucleus             | transporter             |
| E2F3B        | TOMM70A     | translocase of outer mitochondrial membrane 70 homolog A (S. cerevisiae)         | Cytoplasm           | transporter             |
| E2F3B        | TRIM33      | tripartite motif containing 33                                                   | Nucleus             | transcription regulator |
| E2F3B        | TRIP4       | thyroid hormone receptor interactor 4                                            | Nucleus             | transcription regulator |
| E2F3B        | TTC14       | tetratricopeptide repeat domain 14                                               | Other               | other                   |
| E2F3B        | TTC7A       | tetratricopeptide repeat domain 7A                                               | Plasma Membrane     | other                   |
| E2F3B        | TYW1        | tRNA-yW synthesizing protein 1 homolog (S. cerevisiae)                           | Other               | other                   |
| E2F3B        | U2SURP      | U2 snRNP-associated SURP domain containing                                       | Nucleus             | other                   |
| E2F3B        | UBE3C       | ubiquitin protein ligase E3C                                                     | Nucleus             | enzyme                  |
| E2F3B        | UBE4B       | ubiquitination factor E4B                                                        | Cytoplasm           | other                   |
| E2F3B        | UBR5        | ubiquitin protein ligase E3 component n-recognin 5                               | Nucleus             | enzyme                  |
| E2F3B        | UGP2        | UDP-glucose pyrophosphorylase 2                                                  | Cytoplasm           | enzyme                  |
| E2F3B        | USP34       | ubiquitin specific peptidase 34                                                  | Extracellular Space | peptidase               |
| E2F3B        | USP38       | ubiquitin specific peptidase 38                                                  | Other               | peptidase               |
| E2F3B        | VPS13A      | vacuolar protein sorting 13 homolog A (S. cerevisiae)                            | Cytoplasm           | transporter             |
| E2F3B        | WAPAL       | wings apart-like homolog (Drosophila)                                            | Nucleus             | other                   |
| E2F3B        | WHSC1L1     | Wolf-Hirschhorn syndrome candidate 1-like 1                                      | Nucleus             | enzyme                  |
| E2F3B        | XIAP        | X-linked inhibitor of apoptosis, E3 ubiquitin protein ligase                     | Cytoplasm           | enzyme                  |
| E2F3B        | XPNPEP3     | X-prolyl aminopeptidase 3, mitochondrial                                         | Cytoplasm           | peptidase               |
| E2F3B        | XPO4        | exportin 4                                                                       | Nucleus             | transporter             |

## Supplemental Table 12. E2F1 and/or E2FB HCC downregulated targets

| Regulated by | Gene symbol | Entrez Gene Name                               | Location  | Type                    |
|--------------|-------------|------------------------------------------------|-----------|-------------------------|
| E2F3B        | XYLB        | xylulokinase homolog (H. influenzae)           | Cytoplasm | kinase                  |
| E2F3B        | YTHDF3      | YTH N(6)-methyladenosine RNA binding protein 3 | Cytoplasm | other                   |
| E2F3B        | ZBTB44      | zinc finger and BTB domain containing 44       | Other     | other                   |
| E2F3B        | ZC3H8       | zinc finger CCCH-type containing 8             | Nucleus   | transcription regulator |
| E2F3B        | ZCCHC2      | zinc finger, CCHC domain containing 2          | Cytoplasm | other                   |
| E2F3B        | ZFP191      | zinc finger protein 191                        | Nucleus   | transcription regulator |
| E2F3B        | ZFP318      | zinc finger protein 381                        | Nucleus   | other                   |
| E2F3B        | ZFP644      | zinc finger protein 644                        | Nucleus   | other                   |
| E2F3B        | ZFP68       | zinc finger protein 68                         | Nucleus   | other                   |
| E2F3B        | ZHX3        | zinc fingers and homeoboxes 3                  | Nucleus   | transcription regulator |

**Supplemental Table 13. Expression of E2F1 and E2F3B putative direct targets in human liver disease**

| Group        | Affymetrix ID | Gene Symbol | Regulated by | Normal medain | Cirrhotic medain | Dysplastic medain | Early HCC medain | Advanced HCC medain | Fold change          |                      | Advance            |                  |
|--------------|---------------|-------------|--------------|---------------|------------------|-------------------|------------------|---------------------|----------------------|----------------------|--------------------|------------------|
|              |               |             |              |               |                  |                   |                  |                     | Cirrhotic vs. Normal | Cirrhotic adj.pvalue | Adv HCC vs. Normal | d HCC adj.pvalue |
| Advanced HCC | 201292_at     | TOP2A       | E2F1         | 3.78          | 3.98             | 3.95              | 5.60             | 8.28                | <b>1.05</b>          | 0.116                | <b>2.19</b>        | 0.000 *          |
| Advanced HCC | 219148_at     | PBK         | E2F1         | 3.48          | 3.53             | 3.51              | 4.43             | 6.61                | <b>1.02</b>          | 0.237                | <b>1.90</b>        | 0.000 *          |
| Advanced HCC | 203764_at     | DLGAP5      | E2F3B        | 3.43          | 3.64             | 3.56              | 4.47             | 6.36                | <b>1.06</b>          | 0.081                | <b>1.85</b>        | 0.000 *          |
| Advanced HCC | 209714_s_at   | CDKN3       | E2F3B        | 4.49          | 4.53             | 4.45              | 5.77             | 7.76                | <b>1.01</b>          | 0.624                | <b>1.73</b>        | 0.000 *          |
| Advanced HCC | 227350_at     | HELLS       | E2F1         | 3.44          | 3.91             | 3.73              | 4.39             | 5.75                | <b>1.14</b>          | 0.017 *              | <b>1.67</b>        | 0.000 *          |
| Advanced HCC | 210559_s_at   | CDK1        | E2F1         | 4.55          | 4.95             | 4.86              | 5.71             | 7.54                | <b>1.09</b>          | 0.137                | <b>1.66</b>        | 0.000 *          |
| Advanced HCC | 218252_at     | CKAP2       | E2F1         | 4.31          | 5.00             | 4.74              | 5.46             | 6.61                | <b>1.16</b>          | 0.006 *              | <b>1.54</b>        | 0.000 *          |
| Advanced HCC | 225655_at     | UHRF1       | E2F1         | 4.07          | 4.46             | 4.27              | 4.99             | 6.13                | <b>1.10</b>          | 0.074                | <b>1.51</b>        | 0.000 *          |
| Advanced HCC | 203418_at     | CCNA2       | E2F1         | 4.08          | 4.12             | 3.96              | 4.49             | 6.14                | <b>1.01</b>          | 0.702                | <b>1.51</b>        | 0.000 *          |
| Advanced HCC | 203968_s_at   | CDC6        | E2F1         | 3.31          | 3.41             | 3.47              | 3.59             | 4.97                | <b>1.03</b>          | 0.121                | <b>1.50</b>        | 0.000 *          |
| Advanced HCC | 204092_s_at   | AURKA       | E2F1         | 5.20          | 5.44             | 5.61              | 6.20             | 7.76                | <b>1.05</b>          | 0.060                | <b>1.49</b>        | 0.000 *          |
| Advanced HCC | 226980_at     | DEPDC1B     | E2F1         | 2.91          | 3.05             | 2.93              | 3.25             | 4.32                | <b>1.05</b>          | 0.002 *              | <b>1.48</b>        | 0.000 *          |
| Advanced HCC | 218542_at     | CEP55       | E2F1         | 3.09          | 3.05             | 3.05              | 3.32             | 4.52                | <b>0.99</b>          | 0.837                | <b>1.47</b>        | 0.000 *          |
| Advanced HCC | 219493_at     | SHCBP1      | E2F1         | 3.06          | 3.20             | 3.15              | 3.47             | 4.28                | <b>1.05</b>          | 0.036 *              | <b>1.40</b>        | 0.000 *          |
| Advanced HCC | 209218_at     | SQLE        | E2F3B        | 7.05          | 7.27             | 6.64              | 8.69             | 9.63                | <b>1.03</b>          | 0.650                | <b>1.37</b>        | 0.000 *          |
| Advanced HCC | 203693_s_at   | E2F3        | E2F1         | 5.00          | 6.24             | 5.85              | 6.36             | 6.59                | <b>1.25</b>          | 0.002 *              | <b>1.32</b>        | 0.000 *          |
| Advanced HCC | 222593_s_at   | SPATS2      | E2F3B        | 5.35          | 5.88             | 5.70              | 6.44             | 6.86                | <b>1.10</b>          | 0.001 *              | <b>1.28</b>        | 0.000 *          |
| Advanced HCC | 202779_s_at   | UBE2S       | E2F3B        | 6.21          | 6.36             | 6.16              | 7.12             | 7.91                | <b>1.02</b>          | 0.161                | <b>1.27</b>        | 0.000 *          |
| Advanced HCC | 200783_s_at   | STMN1       | E2F1         | 5.90          | 6.16             | 5.84              | 6.61             | 7.46                | <b>1.04</b>          | 0.045 *              | <b>1.26</b>        | 0.000 *          |
| Advanced HCC | 201417_at     | SOX4        | E2F3B        | 6.99          | 8.52             | 8.35              | 8.09             | 8.82                | <b>1.22</b>          | 0.000 *              | <b>1.26</b>        | 0.000 *          |
| Advanced HCC | 224753_at     | CDCA5       | E2F1         | 5.31          | 5.24             | 5.28              | 5.59             | 6.71                | <b>0.99</b>          | 0.935                | <b>1.26</b>        | 0.000 *          |
| Advanced HCC | 210334_x_at   | BIRC5       | E2F1         | 5.19          | 5.23             | 5.08              | 5.43             | 6.52                | <b>1.01</b>          | 0.295                | <b>1.26</b>        | 0.000 *          |
| Advanced HCC | 225827_at     | AGO2        | E2F3B        | 6.06          | 6.27             | 6.34              | 6.96             | 7.54                | <b>1.04</b>          | 0.255                | <b>1.24</b>        | 0.000 *          |
| Advanced HCC | 238756_at     | GAS2L3      | E2F1         | 5.85          | 6.61             | 6.76              | 6.21             | 7.24                | <b>1.13</b>          | 0.006 *              | <b>1.24</b>        | 0.000 *          |
| Advanced HCC | 232676_x_at   | MYEF2       | E2F1         | 4.69          | 5.14             | 4.77              | 4.96             | 5.80                | <b>1.10</b>          | 0.001 *              | <b>1.24</b>        | 0.007 *          |
| Advanced HCC | 211980_at     | COL4A1      | E2F3B        | 8.17          | 9.71             | 9.14              | 9.83             | 9.93                | <b>1.19</b>          | 0.001 *              | <b>1.22</b>        | 0.000 *          |
| Advanced HCC | 201667_at     | GJA1        | E2F1         | 7.06          | 7.85             | 7.73              | 7.66             | 8.47                | <b>1.11</b>          | 0.074                | <b>1.20</b>        | 0.002 *          |
| Advanced HCC | 218741_at     | CENPM       | E2F3B        | 4.84          | 4.90             | 4.87              | 5.14             | 5.71                | <b>1.01</b>          | 0.515                | <b>1.18</b>        | 0.000 *          |
| Advanced HCC | 201897_s_at   | CKS1B       | E2F1         | 8.49          | 8.50             | 8.60              | 8.83             | 9.96                | <b>1.00</b>          | 0.886                | <b>1.17</b>        | 0.000 *          |
| Advanced HCC | 218308_at     | TACC3       | E2F1         | 5.44          | 5.54             | 5.37              | 5.77             | 6.37                | <b>1.02</b>          | 0.221                | <b>1.17</b>        | 0.000 *          |
| Advanced HCC | 201664_at     | SMC4        | E2F1         | 7.42          | 7.41             | 7.53              | 8.06             | 8.66                | <b>1.00</b>          | 0.933                | <b>1.17</b>        | 0.000 *          |
| Advanced HCC | 200639_s_at   | YWHAZ       | E2F3B        | 9.37          | 10.03            | 9.90              | 10.33            | 10.82               | <b>1.07</b>          | 0.003 *              | <b>1.16</b>        | 0.000 *          |
| Advanced HCC | 213523_at     | CCNE1       | E2F1         | 4.83          | 4.93             | 4.90              | 5.12             | 5.56                | <b>1.02</b>          | 0.363                | <b>1.15</b>        | 0.000 *          |



**Supplemental Table 13. Expression of E2F1 and E2F3B putative direct targets in human liver disease**

| Group        | Affymetrix ID | Gene Symbol | Regulated by | Normal medain | Cirrhotic medain | Dysplastic medain | Early HCC medain | Advanced HCC medain | Fold change          |                      | Advance            |                  |
|--------------|---------------|-------------|--------------|---------------|------------------|-------------------|------------------|---------------------|----------------------|----------------------|--------------------|------------------|
|              |               |             |              |               |                  |                   |                  |                     | Cirrhotic vs. Normal | Cirrhotic adj.pvalue | Adv HCC vs. Normal | d HCC adj.pvalue |
| Advanced HCC | 217946_s_at   | SAE1        | E2F3B        | 7.01          | 7.22             | 7.14              | 7.55             | 8.00                | <b>1.03</b>          | 0.310                | <b>1.14</b>        | 0.000 *          |
| Advanced HCC | 201662_s_at   | ACSL3       | E2F1         | 8.50          | 9.16             | 9.09              | 8.94             | 9.47                | <b>1.08</b>          | 0.237                | <b>1.11</b>        | 0.054            |
| Advanced HCC | 238670_at     | RAD18       | E2F1         | 4.83          | 4.62             | 4.90              | 5.02             | 5.32                | <b>0.96</b>          | 0.925                | <b>1.10</b>        | 0.033 *          |
| Advanced HCC | 200618_at     | LASP1       | E2F3B        | 9.22          | 9.58             | 9.16              | 9.69             | 10.12               | <b>1.04</b>          | 0.036 *              | <b>1.10</b>        | 0.000 *          |
| Advanced HCC | 223096_at     | NOP58       | E2F1         | 9.70          | 9.66             | 9.84              | 10.23            | 10.56               | <b>1.00</b>          | 0.515                | <b>1.09</b>        | 0.000 *          |
| Advanced HCC | 236265_at     | SP4         | E2F3B        | 6.63          | 6.93             | 6.23              | 6.91             | 7.21                | <b>1.05</b>          | 0.273                | <b>1.09</b>        | 0.008 *          |
| Advanced HCC | 224926_at     | EXOC4       | E2F1, E2F3B  | 7.41          | 7.45             | 7.45              | 7.83             | 8.01                | <b>1.00</b>          | 0.473                | <b>1.08</b>        | 0.000 *          |
| Advanced HCC | 201275_at     | FDPS        | E2F3B        | 9.84          | 9.13             | 9.16              | 9.77             | 10.52               | <b>0.93</b>          | 1.000                | <b>1.07</b>        | 0.008 *          |
| Advanced HCC | 205024_s_at   | RAD51       | E2F1         | 4.50          | 4.36             | 4.27              | 4.41             | 4.78                | <b>0.97</b>          | 1.000                | <b>1.06</b>        | 0.015 *          |
| Advanced HCC | 221699_s_at   | DDX50       | E2F1         | 8.10          | 8.15             | 7.95              | 8.23             | 8.59                | <b>1.01</b>          | 0.515                | <b>1.06</b>        | 0.006 *          |
| Advanced HCC | 208313_s_at   | SF1         | E2F3B        | 7.92          | 8.09             | 8.09              | 8.21             | 8.40                | <b>1.02</b>          | 0.123                | <b>1.06</b>        | 0.002 *          |
| Advanced HCC | 208881_x_at   | IDI1        | E2F1         | 9.62          | 9.39             | 9.38              | 9.98             | 10.18               | <b>0.98</b>          | 0.837                | <b>1.06</b>        | 0.022 *          |
| Advanced HCC | 208647_at     | FDFT1       | E2F3B        | 9.13          | 9.54             | 9.05              | 9.44             | 9.65                | <b>1.05</b>          | 0.116                | <b>1.06</b>        | 0.091            |
| Advanced HCC | 225032_at     | FNDC3B      | E2F3B        | 9.95          | 9.88             | 9.88              | 9.94             | 10.43               | <b>0.99</b>          | 0.760                | <b>1.05</b>        | 0.134            |
| Advanced HCC | 208668_x_at   | HMG2        | E2F3B        | 11.08         | 11.23            | 11.01             | 11.36            | 11.58               | <b>1.01</b>          | 0.065                | <b>1.05</b>        | 0.002 *          |
| Advanced HCC | 208770_s_at   | EIF4EBP2    | E2F3B        | 8.67          | 8.50             | 8.55              | 8.70             | 9.02                | <b>0.98</b>          | 1.000                | <b>1.04</b>        | 0.013 *          |
| Advanced HCC | 202290_at     | PDAP1       | E2F3B        | 7.56          | 7.48             | 7.25              | 7.43             | 7.85                | <b>0.99</b>          | 0.933                | <b>1.04</b>        | 0.100            |
| Advanced HCC | 205967_at     | HIST1H4A    | E2F1         | 8.19          | 7.81             | 7.90              | 8.00             | 8.43                | <b>0.95</b>          | 0.936                | <b>1.03</b>        | 0.347            |
| Advanced HCC | 202314_at     | CYP51A1     | E2F3B        | 9.13          | 8.87             | 8.82              | 9.23             | 9.36                | <b>0.97</b>          | 0.990                | <b>1.03</b>        | 0.337            |
| Advanced HCC | 215716_s_at   | ATP2B1      | E2F3B        | 7.92          | 7.76             | 7.66              | 7.61             | 8.11                | <b>0.98</b>          | 0.886                | <b>1.02</b>        | 0.043 *          |
| Advanced HCC | 201156_s_at   | RAB5C       | E2F3B        | 7.80          | 7.77             | 7.69              | 7.66             | 7.93                | <b>1.00</b>          | 0.904                | <b>1.02</b>        | 0.557            |
| Advanced HCC | 225592_at     | NRM         | E2F3B        | 6.48          | 6.55             | 6.40              | 6.30             | 6.56                | <b>1.01</b>          | 0.310                | <b>1.01</b>        | 0.202            |
| Advanced HCC | 39729_at      | PRDX2       | E2F3B        | 10.73         | 10.56            | 10.59             | 10.55            | 10.74               | <b>0.98</b>          | 0.935                | <b>1.00</b>        | 0.718            |
| Early HCC    | 225252_at     | SRXN1       | E2F3B        | 7.12          | 7.68             | 7.72              | 9.06             | 8.99                | <b>1.08</b>          | 0.081                | <b>1.26</b>        | 0.000 *          |
| Early HCC    | 205463_s_at   | PDGFA       | E2F3B        | 5.43          | 6.53             | 5.93              | 6.67             | 6.60                | <b>1.20</b>          | 0.002 *              | <b>1.22</b>        | 0.017 *          |
| Early HCC    | 209043_at     | PAPSS1      | E2F1         | 7.43          | 7.86             | 7.31              | 8.33             | 8.12                | <b>1.06</b>          | 0.040 *              | <b>1.09</b>        | 0.001 *          |
| Early HCC    | 213051_at     | ZC3HAV1     | E2F3B        | 8.17          | 8.69             | 8.54              | 9.05             | 8.95                | <b>1.06</b>          | 0.003 *              | <b>1.10</b>        | 0.000 *          |
| Early HCC    | 212642_s_at   | HIVEP2      | E2F1         | 6.48          | 6.84             | 6.98              | 7.11             | 6.68                | <b>1.06</b>          | 0.002 *              | <b>1.03</b>        | 0.067            |
| Early HCC    | 213726_x_at   | TUBB4B      | E2F3B        | 9.43          | 9.45             | 9.56              | 10.12            | 10.08               | <b>1.00</b>          | 0.446                | <b>1.07</b>        | 0.003 *          |
| Early HCC    | 201765_s_at   | HEXA        | E2F1         | 8.68          | 9.06             | 9.04              | 9.22             | 9.11                | <b>1.04</b>          | 0.006 *              | <b>1.05</b>        | 0.002 *          |
| Early HCC    | 218634_at     | PHLDA3      | E2F1, E2F3B  | 6.23          | 6.34             | 6.39              | 6.53             | 6.12                | <b>1.02</b>          | 0.019 *              | <b>0.98</b>        | 0.771            |
| Early HCC    | 201307_at     | SEPT11      | E2F3B        | 7.97          | 8.13             | 7.96              | 8.32             | 8.24                | <b>1.02</b>          | 0.273                | <b>1.03</b>        | 0.083            |

**Supplemental Table 13. Expression of E2F1 and E2F3B putative direct targets in human liver disease**

| Group      | Affymetrix ID | Gene Symbol | Regulated by | Normal medain | Cirrhotic medain | Dysplastic medain | Early HCC medain | Advanced HCC medain | Fold change          |                      | Advance d HCC          |                          |
|------------|---------------|-------------|--------------|---------------|------------------|-------------------|------------------|---------------------|----------------------|----------------------|------------------------|--------------------------|
|            |               |             |              |               |                  |                   |                  |                     | Cirrhotic vs. Normal | Cirrhotic adj.pvalue | Fold change vs. Normal | Advance d HCC adj.pvalue |
| Early HCC  | 201952_at     | ALCAM       | E2F1         | 9.90          | 9.86             | 10.10             | 10.30            | 10.05               | <b>1.00</b>          | 0.933                | <b>1.02</b>            | 0.203                    |
| Early HCC  | 202133_at     | WWTR1       | E2F1         | 8.92          | 9.12             | 8.50              | 9.23             | 8.52                | <b>1.02</b>          | 0.153                | <b>0.95</b>            | 1.000                    |
| Early HCC  | 200801_x_at   | ACTB        | E2F3B        | 12.94         | 13.10            | 13.07             | 13.29            | 13.16               | <b>1.01</b>          | 0.040 *              | <b>1.02</b>            | 0.002 *                  |
| Dysplastic | 229711_s_at   | MDM2        | E2F1         | 7.55          | 8.19             | 8.49              | 8.35             | 8.15                | <b>1.08</b>          | 0.002 *              | <b>1.08</b>            | 0.002 *                  |
| Dysplastic | 212662_at     | PVR         | E2F1         | 6.66          | 7.28             | 7.47              | 7.33             | 6.93                | <b>1.09</b>          | 0.040 *              | <b>1.04</b>            | 0.249                    |
| Dysplastic | 201204_s_at   | RRBP1       | E2F1, E2F3B  | 9.91          | 10.48            | 10.98             | 10.52            | 10.28               | <b>1.06</b>          | 0.092                | <b>1.04</b>            | 0.455                    |
| Dysplastic | 222647_at     | SLC35C1     | E2F3B        | 7.63          | 8.32             | 8.35              | 8.22             | 7.40                | <b>1.09</b>          | 0.255                | <b>0.97</b>            | 0.940                    |
| Dysplastic | 226748_at     | LYSMD2      | E2F3B        | 8.59          | 8.99             | 8.99              | 8.62             | 8.46                | <b>1.05</b>          | 0.003 *              | <b>0.99</b>            | 0.640                    |
| Dysplastic | 224250_s_at   | SECISBP2    | E2F3B        | 8.07          | 7.77             | 8.42              | 8.01             | 8.27                | <b>0.96</b>          | 0.936                | <b>1.03</b>            | 0.258                    |
| Dysplastic | 202704_at     | TOB1        | E2F3B        | 10.13         | 10.28            | 10.57             | 10.39            | 10.07               | <b>1.01</b>          | 0.702                | <b>0.99</b>            | 0.592                    |
| Dysplastic | 202146_at     | IFRD1       | E2F1         | 8.13          | 7.94             | 8.28              | 8.26             | 8.10                | <b>0.98</b>          | 0.933                | <b>1.00</b>            | 0.672                    |
| Dysplastic | 226247_at     | PLEKHA1     | E2F1         | 8.33          | 8.35             | 8.42              | 8.31             | 8.38                | <b>1.00</b>          | 0.624                | <b>1.01</b>            | 0.415                    |
| Dysplastic | 204082_at     | PBX3        | E2F1         | 7.83          | 7.46             | 7.91              | 7.82             | 7.69                | <b>0.95</b>          | 1.000                | <b>0.98</b>            | 1.000                    |
| Dysplastic | 201336_at     | VAMP3       | E2F3B        | 9.74          | 9.82             | 9.83              | 9.82             | 9.76                | <b>1.01</b>          | 0.123                | <b>1.00</b>            | 0.347                    |
| Dysplastic | 218519_at     | SLC35A5     | E2F3B        | 7.94          | 7.93             | 7.96              | 7.64             | 7.63                | <b>1.00</b>          | 0.886                | <b>0.96</b>            | 1.000                    |
| Dysplastic | 201806_s_at   | ATXN2L      | E2F1         | 6.25          | 5.98             | 6.27              | 6.21             | 6.26                | <b>0.96</b>          | 1.000                | <b>1.00</b>            | 0.672                    |
| Cirrhotic  | 201860_s_at   | PLAT        | E2F1         | 5.01          | 6.71             | 5.40              | 6.00             | 5.57                | <b>1.34</b>          | 0.001 *              | <b>1.11</b>            | 0.237                    |
| Cirrhotic  | 203570_at     | LOXL1       | E2F3B        | 4.95          | 6.35             | 5.17              | 5.60             | 5.08                | <b>1.28</b>          | 0.000 *              | <b>1.03</b>            | 0.578                    |
| Cirrhotic  | 201438_at     | COL6A3      | E2F3B        | 7.51          | 8.94             | 8.15              | 8.37             | 8.26                | <b>1.19</b>          | 0.003 *              | <b>1.10</b>            | 0.249                    |
| Cirrhotic  | 209099_x_at   | JAG1        | E2F3B        | 8.13          | 9.64             | 8.89              | 8.92             | 8.78                | <b>1.19</b>          | 0.000 *              | <b>1.08</b>            | 0.002 *                  |
| Cirrhotic  | 201666_at     | TIMP1       | E2F3B        | 10.36         | 12.02            | 11.72             | 11.26            | 10.21               | <b>1.16</b>          | 0.052                | <b>0.99</b>            | 0.950                    |
| Cirrhotic  | 201236_s_at   | BTG2        | E2F1, E2F3B  | 7.77          | 8.83             | 7.93              | 7.50             | 7.37                | <b>1.14</b>          | 0.023 *              | <b>0.95</b>            | 0.950                    |
| Cirrhotic  | 209101_at     | CTGF        | E2F3B        | 8.28          | 9.32             | 8.57              | 8.08             | 8.45                | <b>1.13</b>          | 0.014 *              | <b>1.02</b>            | 0.660                    |
| Cirrhotic  | 202284_s_at   | CDKN1A      | E2F1, E2F3B  | 8.51          | 9.55             | 9.31              | 8.82             | 7.94                | <b>1.12</b>          | 0.005 *              | <b>0.93</b>            | 1.000                    |
| Cirrhotic  | 200791_s_at   | IQGAP1      | E2F3B        | 8.40          | 9.19             | 8.64              | 8.46             | 8.58                | <b>1.09</b>          | 0.001 *              | <b>1.02</b>            | 0.592                    |
| Cirrhotic  | 201105_at     | LGALS1      | E2F1, E2F3B  | 9.88          | 10.56            | 9.76              | 10.11            | 10.11               | <b>1.07</b>          | 0.005 *              | <b>1.02</b>            | 0.455                    |
| Cirrhotic  | 201289_at     | CYR61       | E2F3B        | 9.86          | 10.41            | 9.99              | 8.66             | 7.79                | <b>1.06</b>          | 0.065                | <b>0.79</b>            | 1.000                    |
| Cirrhotic  | 1007_s_at     | DDR1        | E2F3B        | 7.08          | 7.47             | 7.00              | 6.82             | 7.05                | <b>1.06</b>          | 0.001 *              | <b>1.00</b>            | 0.337                    |
| Cirrhotic  | 217795_s_at   | TMEM43      | E2F1, E2F3B  | 7.05          | 7.42             | 7.14              | 7.20             | 7.09                | <b>1.05</b>          | 0.026 *              | <b>1.01</b>            | 0.258                    |
| Cirrhotic  | 208891_at     | DUSP6       | E2F1         | 10.21         | 10.74            | 10.21             | 9.86             | 9.64                | <b>1.05</b>          | 0.005 *              | <b>0.94</b>            | 1.000                    |
| Cirrhotic  | 238505_at     | ADPRH       | E2F3B        | 4.91          | 5.17             | 5.07              | 4.86             | 4.82                | <b>1.05</b>          | 0.042 *              | <b>0.98</b>            | 1.000                    |

**Supplemental Table 13. Expression of E2F1 and E2F3B putative direct targets in human liver disease**

| Group     | Affymetrix ID | Gene Symbol | Regulated by | Normal medain | Cirrhotic medain | Dysplastic medain | Early HCC medain | Advanced HCC medain | Fold change          |                      | Advance            |                  |
|-----------|---------------|-------------|--------------|---------------|------------------|-------------------|------------------|---------------------|----------------------|----------------------|--------------------|------------------|
|           |               |             |              |               |                  |                   |                  |                     | Cirrhotic vs. Normal | Cirrhotic adj.pvalue | Adv HCC vs. Normal | d HCC adj.pvalue |
| Cirrhotic | 214755_at     | UAP1L1      | E2F3B        | 4.07          | 4.26             | 4.10              | 4.26             | 4.14                | <b>1.05</b>          | 0.006 *              | <b>1.02</b>        | 0.160            |
| Cirrhotic | 201920_at     | SLC20A1     | E2F1         | 8.68          | 9.04             | 8.99              | 8.78             | 8.79                | <b>1.04</b>          | 0.161                | <b>1.01</b>        | 0.347            |
| Cirrhotic | 211926_s_at   | MYH9        | E2F3B        | 8.35          | 8.68             | 8.57              | 8.58             | 8.66                | <b>1.04</b>          | 0.007 *              | <b>1.04</b>        | 0.015 *          |
| Cirrhotic | 1555832_s_at  | KLF6        | E2F3B        | 10.75         | 11.16            | 10.52             | 10.62            | 10.12               | <b>1.04</b>          | 0.515                | <b>0.94</b>        | 1.000            |
| Cirrhotic | 208690_s_at   | PDLIM1      | E2F3B        | 9.98          | 10.35            | 10.02             | 10.30            | 10.21               | <b>1.04</b>          | 0.002 *              | <b>1.02</b>        | 0.258            |
| Cirrhotic | 209191_at     | TUBB6       | E2F1, E2F3B  | 7.06          | 7.31             | 7.00              | 6.45             | 6.45                | <b>1.04</b>          | 0.161                | <b>0.91</b>        | 1.000            |
| Cirrhotic | 200621_at     | CSRP1       | E2F3B        | 9.26          | 9.59             | 9.24              | 9.09             | 8.53                | <b>1.04</b>          | 0.026 *              | <b>0.92</b>        | 1.000            |
| Cirrhotic | 202431_s_at   | MYC         | E2F1         | 9.43          | 9.67             | 9.62              | 8.55             | 9.35                | <b>1.03</b>          | 0.310                | <b>0.99</b>        | 0.771            |
| Cirrhotic | 201146_at     | NFE2L2      | E2F1         | 10.46         | 10.72            | 10.61             | 10.05            | 9.97                | <b>1.02</b>          | 0.065                | <b>0.95</b>        | 1.000            |
| Cirrhotic | 200871_s_at   | PSAP        | E2F3B        | 11.58         | 11.87            | 11.71             | 11.74            | 11.79               | <b>1.02</b>          | 0.001 *              | <b>1.02</b>        | 0.002 *          |
| Cirrhotic | 211535_s_at   | FGFR1       | E2F3B        | 7.20          | 7.30             | 7.19              | 6.76             | 6.84                | <b>1.01</b>          | 0.123                | <b>0.95</b>        | 1.000            |
| Cirrhotic | 201040_at     | GNAI2       | E2F3B        | 8.47          | 8.58             | 8.39              | 8.38             | 8.43                | <b>1.01</b>          | 0.161                | <b>1.00</b>        | 0.939            |
| Cirrhotic | 223361_at     | ABRACL      | E2F3B        | 7.36          | 7.44             | 7.41              | 7.17             | 7.03                | <b>1.01</b>          | 0.446                | <b>0.95</b>        | 0.991            |
| Cirrhotic | 41856_at      | UNC5B       | E2F1, E2F3B  | 7.18          | 7.19             | 7.11              | 6.97             | 6.98                | <b>1.00</b>          | 0.624                | <b>0.97</b>        | 1.000            |
| Normal    | 212099_at     | RHOB        | E2F1         | 12.03         | 11.79            | 11.62             | 11.54            | 10.49               | <b>0.98</b>          | 0.994                | <b>0.87</b>        | 1.000            |
| Normal    | 202241_at     | TRIB1       | E2F1         | 11.43         | 10.87            | 10.66             | 10.24            | 10.24               | <b>0.95</b>          | 1.000                | <b>0.90</b>        | 1.000            |
| Normal    | 203752_s_at   | JUND        | E2F1, E2F3B  | 10.70         | 10.44            | 10.67             | 10.42            | 10.10               | <b>0.98</b>          | 0.925                | <b>0.94</b>        | 1.000            |
| Normal    | 212845_at     | SAMD4A      | E2F3B        | 9.33          | 8.75             | 8.83              | 8.49             | 8.29                | <b>0.94</b>          | 1.000                | <b>0.89</b>        | 1.000            |
| Normal    | 221689_s_at   | PIGP        | E2F1         | 9.15          | 8.90             | 8.85              | 9.06             | 8.99                | <b>0.97</b>          | 1.000                | <b>0.98</b>        | 1.000            |
| Normal    | 219247_s_at   | ZDHHC14     | E2F3B        | 7.44          | 7.20             | 7.09              | 7.44             | 7.33                | <b>0.97</b>          | 1.000                | <b>0.99</b>        | 1.000            |
| Normal    | 205249_at     | EGR2        | E2F1, E2F3B  | 7.37          | 6.62             | 6.11              | 5.49             | 5.23                | <b>0.90</b>          | 1.000                | <b>0.71</b>        | 1.000            |
| Normal    | 212602_at     | WDFY3       | E2F3B        | 6.61          | 6.56             | 6.57              | 6.42             | 6.50                | <b>0.99</b>          | 0.886                | <b>0.98</b>        | 0.928            |
| Normal    | 38037_at      | HBEGF       | E2F3B        | 6.44          | 6.42             | 6.25              | 5.84             | 5.80                | <b>1.00</b>          | 0.577                | <b>0.90</b>        | 1.000            |
| Normal    | 230706_s_at   | CAMK2N2     | E2F1         | 5.67          | 5.67             | 5.65              | 5.58             | 5.59                | <b>1.00</b>          | 0.925                | <b>0.99</b>        | 0.940            |
| Normal    | 226308_at     | HAUS8       | E2F3B        | 5.51          | 5.28             | 5.34              | 5.36             | 5.49                | <b>0.96</b>          | 1.000                | <b>1.00</b>        | 0.950            |
| Normal    | 229423_at     | CHEK1       | E2F1         | 4.98          | 4.61             | 4.76              | 4.78             | 4.91                | <b>0.92</b>          | 1.000                | <b>0.99</b>        | 0.736            |

\*P-value vs. control Wilcoxon method with Benjamini–Hochberg (BH) correction.

**Supplemental Table 14. General IPA functions for E2F1 and E2F3B putative direct targets**

|                  | <b>Category</b>                            | <b>B-H p-value</b> | <b>Genes</b>                                                                                                                                                                                                                                                                                                                              |
|------------------|--------------------------------------------|--------------------|-------------------------------------------------------------------------------------------------------------------------------------------------------------------------------------------------------------------------------------------------------------------------------------------------------------------------------------------|
| E2F1 upregulated | Cell Cycle                                 | 3.41E-10           | WWTR1,SMC4,CAMK2N2,E2F3,CHEK1,STMN1,MYC,RAD51,CCNA2,RHOB, TOP2A,JUND,CDCA5,NFE2L2,TACC3,GJA1,UHRF1, CDC6,CKAP2,MDM2,HELLS,AURKA,BIRC5,CDK1,CCNE1,CDKN1A,BTG2,RAD18,CKS1B,CEP55,LGALS1                                                                                                                                                     |
| E2F1 upregulated | Cell Death and Survival                    | 3.41E-10           | DUSP6,UNC5B,CAMK2N2,E2F3,PBK,CHEK1,RAD51,STMN1,MYC,TRIB1,CCNA2,EGR2,RHOB,NOP58, TOP2A,JUND,IFRD1,NFE2L2,SLC20A1,TACC3,GJA1,UHRF1,RRBP1,PHLDA3,CDC6,MDM2,CKAP2,HELLS,AURKA,PVR,BIRC5,CDK1,CCNE1,TUBB6,PBX3,BTG2,CDKN1A,RAD18,ALCAM,LGALS1                                                                                                  |
| E2F1 upregulated | Cellular Development                       | 7.32E-09           | DUSP6,WWTR1,UNC5B,CAMK2N2,E2F3,PBK,CHEK1,STMN1,MYC,RAD51,TRIB1,CCNA2,HIST1H4A,EGR2,RHOB,NOP58, TOP2A,CDCA5,JUND,IFRD1,NFE2L2,SLC20A1,TACC3,GJA1,UHRF1,RRBP1,CDC6,HELLS,MDM2,AURKA,BIRC5,CDK1,HIVEP2,CCNE1,EXOC4,PBX3,BTG2,CDKN1A,CKS1B,ALCAM,LGALS1                                                                                       |
| E2F1 upregulated | Cellular Growth and Proliferation          | 7.32E-09           | DUSP6,WWTR1,UNC5B,HEXA,CAMK2N2,E2F3,PBK,CHEK1,STMN1,MYC,RAD51,TRIB1,CCNA2,EGR2,RHOB,NOP58, TOP2A,CDC A5,JUND,NFE2L2,SLC20A1,TACC3,GJA1,UHRF1,CDC6,HELLS,MDM2,AURKA,BIRC5,CDK1,HIVEP2,CCNE1,EXOC4,PBX3,BTG2,CDKN1A,RAD18,CKS1B,ALCAM,PLEKHA1,LGALS1                                                                                        |
| E2F1 upregulated | DNA Replication, Recombination, and Repair | 1.63E-07           | SMC4,E2F3,PBK,CHEK1,RAD51,MYC,STMN1,CCNA2, TOP2A,CDCA5,TACC3,GJA1,UHRF1,PHLDA3,CDC6,HELLS,MDM2,AURKA, BIRC5,CDK1,CCNE1,CDKN1A,BTG2,RAD18,CKS1B,LGALS1                                                                                                                                                                                     |
| E2F1 upregulated | Cancer                                     | 1.71E-07           | DEPDC1B,IDI1,UNC5B,SMC4,PBK,STMN1,MYC,EGR2,RHOB,JUND,GJA1,ACSL3,MYEF2,RRBP1,CKAP2,HELLS,AURKA,BTG2,RA D18,ALCAM,CEP55,DUSP6,WWTR1,GAS2L3,E2F3,CAMK2N2,CHEK1,RAD51,CCNA2,TRIB1,NOP58, TOP2A,CDCA5,IFRD1,NFE2L2,SLC20A1,UHRF1,DDX50,PHLDA3,CDC6,MDM2,PVR,ATXN2L,BIRC5,CDK1,HIVEP2,CCNE1,EXOC4,PBX3,TUBB6,CDKN1A,CKS1 B,PAPSS1,SPATS2,LGALS1 |
| E2F1 upregulated | Connective Tissue Development and Function | 4.74E-07           | E2F3,CHEK1,STMN1,MYC,CCNA2,EGR2,RHOB,NOP58,JUND,CDCA5,NFE2L2,SLC20A1,GJA1,UHRF1,CDC6,MDM2,CKAP2,HELL S,AURKA,BIRC5,HIVEP2,CCNE1,BTG2,CDKN1A,RAD18,CKS1B                                                                                                                                                                                   |
| E2F1 upregulated | Organismal Injury and Abnormalities        | 4.88E-07           | DEPDC1B,IDI1,UNC5B,SMC4,PBK,MYC,STMN1,EGR2,RHOB,JUND,ACSL3,GJA1,MYEF2,RRBP1,CKAP2,HELLS,AURKA,BTG2,RA D18,ALCAM,CEP55,WWTR1,DUSP6,GAS2L3,CAMK2N2,E2F3,CHEK1,RAD51,CCNA2,TRIB1,NOP58, TOP2A,CDCA5,IFRD1,NFE2L2,SLC20A1,UHRF1,DDX50,PHLDA3,CDC6,MDM2,PVR,ATXN2L,BIRC5,CDK1,HIVEP2,CCNE1,EXOC4,PBX3,TUBB6,CDKN1A,CKS1 B,PAPSS1,SPATS2,LGALS1 |
| E2F1 upregulated | Tumor Morphology                           | 4.88E-07           | GJA1,UHRF1,CDC6,MDM2,BIRC5,CDK1,CHEK1,MYC,RAD51,STMN1,TRIB1,CCNE1,RHOB,CDKN1A,BTG2,CKS1B,ALCAM,NFE2L 2,LGALS1                                                                                                                                                                                                                             |
| E2F1 upregulated | Cellular Assembly and Organization         | 4.88E-07           | WWTR1,UNC5B,SMC4,HEXA,GAS2L3,CHEK1,RAD51,MYC,STMN1,CCNA2,RHOB, TOP2A,IFRD1,TACC3,GJA1,UHRF1,RRBP1,CD C6,HELLS,MDM2,CKAP2,AURKA,PVR,BIRC5,CDK1,CCNE1,BTG2,CDKN1A,RAD18                                                                                                                                                                     |
| E2F1 upregulated | Connective Tissue Disorders                | 5.01E-07           | UNC5B,MDM2,BIRC5,CDK1,CHEK1,STMN1,MYC,CCNE1,EGR2,RHOB,CDKN1A, TOP2A,JUND,NFE2L2                                                                                                                                                                                                                                                           |
| E2F1 upregulated | Reproductive System Disease                | 1.18E-06           | DEPDC1B,WWTR1,SMC4,CAMK2N2,E2F3,CHEK1,RAD51,STMN1,MYC,TRIB1,CCNA2,EGR2,RHOB, TOP2A,JUND,IFRD1,NFE2L2, SLC20A1,GJA1,ACSL3,UHRF1,RRBP1,DDX50,PHLDA3,CDC6,MDM2,AURKA,BIRC5,CDK1,HIVEP2,CCNE1,TUBB6,EXOC4,BTG2, CDKN1A,CKS1B,ALCAM,SPATS2,CEP55,LGALS1                                                                                        |
| E2F1 upregulated | Respiratory Disease                        | 2.15E-06           | MYEF2,DUSP6,CDC6,HELLS,MDM2,AURKA,BIRC5,CDK1,STMN1,MYC,CCNA2,CDKN1A, TOP2A,CKS1B,ALCAM,CDCA5,NFE2L2,L GALS1                                                                                                                                                                                                                               |
| E2F1 upregulated | Cellular Movement                          | 2.77E-06           | DUSP6,WWTR1,UNC5B,E2F3,PBK,MYC,STMN1,CCNA2,TRIB1,EGR2,RHOB, TOP2A,JUND,NFE2L2,GJA1,CDC6,MDM2,CKAP2,AU RKA,PVR,BIRC5,CDK1,BTG2,CDKN1A,ALCAM,CEP55,LGALS1                                                                                                                                                                                   |
| E2F1 upregulated | Renal and Urological Disease               | 1.50E-05           | ACSL3,DUSP6,WWTR1,UNC5B,HELLS,MDM2,AURKA,ATXN2L,E2F3,BIRC5,CDK1,MYC,STMN1,RAD51,TRIB1,CCNA2,EXOC4,RH OB,BTG2,CDKN1A, TOP2A,NFE2L2                                                                                                                                                                                                         |

**Supplemental Table 14. General IPA functions for E2F1 and E2F3B putative direct targets**

|                  | Category                                              | B-H p-value | Genes                                                                                                                                                                          |
|------------------|-------------------------------------------------------|-------------|--------------------------------------------------------------------------------------------------------------------------------------------------------------------------------|
| E2F1 upregulated | Hematological Disease                                 | 2.19E-05    | E2F3,CHEK1,MYC,STMN1,RAD51,TRIB1,CCNA2,EGR2,RHOB,TOP2A,NFE2L2,SLC20A1,RRBP1,HELLS,MDM2,AURKA,BIRC5,CDK1,EXOC4,PBX3,CDKN1A,BTG2,PAPSS1,CEP55,LGALS1                             |
| E2F1 upregulated | Immunological Disease                                 | 2.19E-05    | MDM2,AURKA,BIRC5,CDK1,CHEK1,RAD51,MYC,STMN1,CCNA2,EGR2,RHOB,CDKN1A,BTG2,TOP2A,NFE2L2,LGALS1                                                                                    |
| E2F1 upregulated | Gene Expression                                       | 2.39E-05    | WWTR1,E2F3,MYC,CCNA2,EGR2,RHOB,TOP2A,JUND,IFRD1,NFE2L2,SLC20A1,GJA1,UHRF1,RRBP1,CKAP2,MDM2,HELLS,BIRC5,CDK1,HIVEP2,CCNE1,PBX3,CDKN1A,BTG2,LGALS1                               |
| E2F1 upregulated | Cell Morphology                                       | 2.40E-05    | TACC3,GJA1,WWTR1,HEXA,HELLS,MDM2,AURKA,E2F3,BIRC5,CDK1,HIVEP2,CHEK1,RAD51,STMN1,MYC,TRIB1,CCNA2,RHOB,CDKN1A,RAD18,NFE2L2,LGALS1                                                |
| E2F1 upregulated | Cellular Function and Maintenance                     | 2.40E-05    | WWTR1,UNC5B,HEXA,GAS2L3,CHEK1,MYC,STMN1,RAD51,EGR2,RHOB,IFRD1,NFE2L2,TACC3,GJA1,RRBP1,CKAP2,MDM2,PVR,AURKA,BIRC5,CDK1,HIVEP2,CDKN1A,BTG2,RAD18,LGALS1                          |
| E2F1 upregulated | Tissue Morphology                                     | 4.29E-05    | SLC20A1,GJA1,TACC3,UHRF1,DUSP6,HELLS,MDM2,E2F3,BIRC5,HIVEP2,STMN1,MYC,TRIB1,CCNA2,CCNE1,SHCBP1,EGR2,RHOB,CDKN1A,BTG2,RAD18,ALCAM,NFE2L2,LGALS1                                 |
| E2F1 upregulated | Embryonic Development                                 | 5.08E-05    | SLC20A1,TACC3,GJA1,WWTR1,DUSP6,MDM2,AURKA,E2F3,BIRC5,CHEK1,RAD51,MYC,CCNA2,CCNE1,EGR2,PBX3,BTG2,CDKN1A,PLEKHA1,NFE2L2                                                          |
| E2F1 upregulated | Renal and Urological System Development and Function  | 5.90E-05    | MYC,DUSP6,NOP58,CDKN1A,UNC5B,CDCA5,AURKA,E2F3,BIRC5                                                                                                                            |
| E2F1 upregulated | Tissue Development                                    | 7.74E-05    | WWTR1,HEXA,E2F3,CHEK1,STMN1,MYC,RAD51,TRIB1,CCNA2,EGR2,RHOB,JUND,NFE2L2,SLC20A1,GJA1,TACC3,RRBP1,CDC6,MDM2,AURKA,BIRC5,CDK1,HIVEP2,CCNE1,PBX3,BTG2,CDKN1A,RAD18,PLEKHA1,LGALS1 |
| E2F1 upregulated | Developmental Disorder                                | 7.78E-05    | SLC20A1,GJA1,TACC3,UHRF1,WWTR1,CDC6,HEXA,HELLS,MDM2,AURKA,E2F3,BIRC5,MYC,CCNA2,TRIB1,CCNE1,EGR2,PBX3,EXOC4,CDKN1A,NFE2L2                                                       |
| E2F1 upregulated | Digestive System Development and Function             | 8.50E-05    | MYC,SLC20A1,CCNE1,GJA1,CDKN1A,JUND,NFE2L2,LGALS1                                                                                                                               |
| E2F1 upregulated | Hepatic System Development and Function               | 8.50E-05    | MYC,SLC20A1,CCNE1,CDKN1A,JUND,E2F3,NFE2L2,LGALS1                                                                                                                               |
| E2F1 upregulated | Organ Development                                     | 8.50E-05    | SLC20A1,GJA1,E2F3,BIRC5,MYC,TRIB1,CCNE1,EGR2,NOP58,CDKN1A,JUND,NFE2L2,LGALS1                                                                                                   |
| E2F1 upregulated | Skeletal and Muscular System Development and Function | 1.40E-04    | GJA1,RRBP1,DUSP6,WWTR1,MDM2,E2F3,BIRC5,HIVEP2,MYC,STMN1,CCNA2,TRIB1,CCNE1,CDKN1A,JUND,NFE2L2                                                                                   |
| E2F1 upregulated | Cell-To-Cell Signaling and Interaction                | 1.73E-04    | MYC,GJA1,RHOB,CDKN1A,TOP2A,MDM2,PVR,BIRC5,CHEK1                                                                                                                                |
| E2F1 upregulated | Inflammatory Response                                 | 1.73E-04    | GJA1,IDI1,MDM2,E2F3,PBK,BIRC5,MYC,CCNA2,SHCBP1,EGR2,CDKN1A,TOP2A,ALCAM,PLEKHA1,NFE2L2,LGALS1                                                                                   |
| E2F1 upregulated | Cellular Response to Therapeutics                     | 1.73E-04    | AURKA,NFE2L2                                                                                                                                                                   |
| E2F1 upregulated | Hematological System Development and Function         | 1.73E-04    | SLC20A1,GJA1,TACC3,MDM2,HELLS,BIRC5,CDK1,HIVEP2,CHEK1,MYC,TRIB1,HIST1H4A,SHCBP1,EGR2,CDKN1A,BTG2,TOP2A,NFE2L2,LGALS1                                                           |
| E2F1 upregulated | Hematopoiesis                                         | 1.73E-04    | MYC,SLC20A1,TACC3,GJA1,EGR2,CDKN1A,HELLS,NFE2L2,BIRC5,CDK1,HIVEP2,CHEK1                                                                                                        |

## Supplemental Table 14. General IPA functions for E2F1 and E2F3B putative direct targets

|                  | Category                                       | B-H p-value | Genes                                                                                                                                                                                                                                |
|------------------|------------------------------------------------|-------------|--------------------------------------------------------------------------------------------------------------------------------------------------------------------------------------------------------------------------------------|
| E2F1 upregulated | Dermatological Diseases and Conditions         | 1.96E-04    | MYC,GJA1,CDKN1A,HELLS,MDM2,BIRC5,NFE2L2                                                                                                                                                                                              |
| E2F1 upregulated | Cardiovascular System Development and Function | 2.15E-04    | MYC,TRIB1,CCNA2,GJA1,CDKN1A,E2F3,NFE2L2,BIRC5                                                                                                                                                                                        |
| E2F1 upregulated | Hereditary Disorder                            | 4.33E-04    | MYC,CCNA2,EXOC4,WWTR1,CDKN1A,BIRC5                                                                                                                                                                                                   |
| E2F1 upregulated | Skeletal and Muscular Disorders                | 5.00E-04    | MYC,DUSP6,CDKN1A,JUND,MDM2,E2F3,CAMK2N2,BIRC5                                                                                                                                                                                        |
| E2F1 upregulated | Organ Morphology                               | 5.29E-04    | MYC,TRIB1,GJA1,TACC3,DUSP6,CDKN1A,HELLS,MDM2,BIRC5,NFE2L2,HIVEP2                                                                                                                                                                     |
| E2F1 upregulated | Cardiovascular Disease                         | 5.75E-04    | SLC20A1,GJA1,DUSP6,MDM2,AURKA,CAMK2N2,E2F3,BIRC5,CDK1,MYC,CCNA2,CCNE1,PBX3,CDKN1A,TOP2A,ALCAM,JUND                                                                                                                                   |
| E2F1 upregulated | Hair and Skin Development and Function         | 7.15E-04    | MYC,CCNE1,CDKN1A,E2F3,NFE2L2                                                                                                                                                                                                         |
| E2F1 upregulated | Endocrine System Disorders                     | 8.63E-04    | UNC5B,SMC4,CAMK2N2,E2F3,BIRC5,CDK1,CHEK1,MYC,CDKN1A,TOP2A,ALCAM,CDCA5,LGALS1                                                                                                                                                         |
| E2F1 upregulated | Reproductive System Development and Function   | 8.63E-04    | MYC,SLC20A1,TRIB1,GJA1,CCNE1,NOP58,CDKN1A,RAD18,HEXA,E2F3                                                                                                                                                                            |
| E2F1 upregulated | Neurological Disease                           | 9.32E-04    | GJA1,DUSP6,UNC5B,HEXA,E2F3,BIRC5,CDK1,CHEK1,MYC,TRIB1,EGR2,CDKN1A,BTG2,TOP2A,IFRD1,NFE2L2,LGALS1                                                                                                                                     |
| E2F1 upregulated | Lymphoid Tissue Structure and Development      | 1.02E-03    | SLC20A1,TACC3,GJA1,MDM2,HELLS,BIRC5,HIVEP2,CHEK1,MYC,TRIB1,EGR2,CDKN1A,ALCAM,NFE2L2                                                                                                                                                  |
| E2F1 upregulated | Organismal Survival                            | 1.18E-03    | SLC20A1,TACC3,GJA1,UHRF1,HEXA,HELLS,MDM2,AURKA,CAMK2N2,E2F3,BIRC5,CDK1,CHEK1,MYC,RAD51,CCNA2,CCNE1,EGR2,PBX3,CDKN1A,TOP2A,CKS1B,NFE2L2,LGALS1                                                                                        |
| E2F1 upregulated | Post-Translational Modification                | 1.21E-03    | WWTR1,DUSP6,CDC6,AURKA,PBK,BIRC5,CDK1,CHEK1,RAD51,CCNE1,CDKN1A,CKS1B,LGALS1                                                                                                                                                          |
| E2F1 upregulated | Gastrointestinal Disease                       | 1.65E-03    | IDI1,DUSP6,WWTR1,UNC5B,SMC4,GAS2L3,PBK,CHEK1,MYC,RAD51,CCNA2,EGR2,NOP58,TOP2A,JUND,CDCA5,NFE2L2,SLC20A1,GJA1,ACSL3,MYEF2,DDX50,CDC6,MDM2,HELLS,CKAP2,PVR,AURKA,ATXN2L,BIRC5,CDK1,HIVEP2,EXOC4,CDKN1A,PAPSS1,RAD18,ALCAM,CEP55,LGALS1 |
| E2F1 upregulated | Nervous System Development and Function        | 2.04E-03    | GJA1,UNC5B,E2F3,NFE2L2,CDK1,CHEK1                                                                                                                                                                                                    |
| E2F1 upregulated | Free Radical Scavenging                        | 3.03E-03    | MYC,CDKN1A,BIRC5,NFE2L2,PBK                                                                                                                                                                                                          |
| E2F1 upregulated | Molecular Transport                            | 3.03E-03    | MYC,TRIB1,CDKN1A,JUND,BIRC5,PBK,NFE2L2                                                                                                                                                                                               |
| E2F1 upregulated | Organismal Development                         | 3.21E-03    | SLC20A1,GJA1,UHRF1,WWTR1,DUSP6,MDM2,AURKA,E2F3,BIRC5,CDK1,CHEK1,RAD51,MYC,CCNA2,CCNE1,EGR2,PBX3,CDKN1A,CKS1B,JUND,PLEKHA1,IFRD1,NFE2L2,LGALS1                                                                                        |

**Supplemental Table 14. General IPA functions for E2F1 and E2F3B putative direct targets**

|                   | Category                                       | B-H p-value | Genes                                                                                                                                                                                                                                                                                                                                                                                 |
|-------------------|------------------------------------------------|-------------|---------------------------------------------------------------------------------------------------------------------------------------------------------------------------------------------------------------------------------------------------------------------------------------------------------------------------------------------------------------------------------------|
| E2F1 upregulated  | Respiratory System Development and Function    | 3.41E-03    | MYC,GJA1,PBX3,BTG2,CDKN1A,HEXA,MDM2,NFE2L2,LGALS1                                                                                                                                                                                                                                                                                                                                     |
| E2F1 upregulated  | Energy Production                              | 3.47E-03    | CDC6,TOP2A,CDK1                                                                                                                                                                                                                                                                                                                                                                       |
| E2F1 upregulated  | Nucleic Acid Metabolism                        | 3.47E-03    | STMN1,CDC6,TOP2A,CDK1                                                                                                                                                                                                                                                                                                                                                                 |
| E2F1 upregulated  | Small Molecule Biochemistry                    | 3.47E-03    | STMN1,CDC6,TOP2A,PBK,CDK1,CHEK1                                                                                                                                                                                                                                                                                                                                                       |
| E2F1 upregulated  | Amino Acid Metabolism                          | 3.65E-03    | PBK,CDK1,CHEK1                                                                                                                                                                                                                                                                                                                                                                        |
| E2F1 upregulated  | Cellular Compromise                            | 4.03E-03    | MYC,CDKN1A,MDM2                                                                                                                                                                                                                                                                                                                                                                       |
| E2F1 upregulated  | Protein Trafficking                            | 4.03E-03    | MDM2,PLEKHA1,CEP55                                                                                                                                                                                                                                                                                                                                                                    |
| E2F1 upregulated  | Cell-mediated Immune Response                  | 4.26E-03    | EGR2,CDKN1A,BIRC5,CHEK1                                                                                                                                                                                                                                                                                                                                                               |
| E2F1 upregulated  | Hepatic System Disease                         | 4.26E-03    | MYC,SLC20A1,CDKN1A,JUND,NFE2L2                                                                                                                                                                                                                                                                                                                                                        |
| E2F3B upregulated | Cancer                                         | 4.95E-09    | DLGAP5,MYH9,CTGF,ATP2B1,UNC5B,KLF6,FNDC3B,SLC35C1,ZDHHC14,SECISBP2,FDFT1,EGR2,JUND,SOX4,LIPT2,COL4A1,HMGN2,RRBP1,FGFR1,ZC3HAV1,YWHAZ,HBEGF,UBE2S,DDR1,SP4,COL6A3,BTG2,LOXL1,PDLIM1,CYR61,JAG1,SAMD4A,PRDX2,SQLI,EIF4EBP2,PDGFA,IQGAP1,CDKN3,WDFY3,TIMP1,CYP51A1,LASP1,PLAT,SLC35A5,HAUS8,TUBB4B,ACTB,PHLDA3,TOB1,AGO2,FDPS,PDAP1,GNAI2,TUBB6,EXOC4,PVT1,UAP1L1,CDKN1A,PSAP,SF1,LGALS1 |
| E2F3B upregulated | Organismal Injury and Abnormalities            | 4.95E-09    | DLGAP5,MYH9,CTGF,ATP2B1,UNC5B,KLF6,FNDC3B,SLC35C1,ZDHHC14,SECISBP2,FDFT1,EGR2,JUND,SOX4,LIPT2,COL4A1,HMGN2,RRBP1,FGFR1,ZC3HAV1,YWHAZ,HBEGF,UBE2S,DDR1,SP4,COL6A3,BTG2,LOXL1,PDLIM1,TMEM43,CYR61,JAG1,SAMD4A,PRDX2,SQLI,PDGFA,IQGAP1,CDKN3,WDFY3,TIMP1,CYP51A1,LASP1,PLAT,SLC35A5,HAUS8,TUBB4B,ACTB,PHLDA3,TOB1,AGO2,PDAP1,FDPS,GNAI2,EXOC4,TUBB6,PVT1,UAP1L1,CDKN1A,PSAP,SF1,LGALS1   |
| E2F3B upregulated | Cellular Movement                              | 4.78E-07    | CTGF,MYH9,PDGFA,KLF6,UNC5B,FNDC3B,IQGAP1,CDKN3,EGR2,TIMP1,JUND,LASP1,PLAT,SOX4,COL4A1,FGFR1,ACTB,YWHAZ,AGO2,HBEGF,DDR1,GNAI2,CDKN1A,BTG2,PDLIM1,SF1,JAG1,CYR61,LGALS1,PRDX2                                                                                                                                                                                                           |
| E2F3B upregulated | Cardiovascular System Development and Function | 1.10E-05    | SOX4,MYH9,COL4A1,CTGF,PDGFA,FGFR1,KLF6,UNC5B,YWHAZ,AGO2,HBEGF,DDR1,TIMP1,CDKN1A,PSAP,JUND,JAG1,CYR61,CYP51A1,LASP1,PRDX2,LGALS1,PLAT                                                                                                                                                                                                                                                  |
| E2F3B upregulated | Organismal Development                         | 1.10E-05    | MYH9,CTGF,EIF4EBP2,PDGFA,UNC5B,KLF6,SLC35C1,FNDC3B,IQGAP1,SECISBP2,FDFT1,EGR2,TIMP1,JUND,LASP1,CYP51A1,PLAT,SOX4,COL4A1,FGFR1,ZC3HAV1,YWHAZ,HBEGF,AGO2,DDR1,SP4,GNAI2,COL6A3,CDKN1A,LOXL1,BTG2,PSAP,JAG1,CYR61,LGALS1,PRDX2                                                                                                                                                           |
| E2F3B upregulated | Cellular Growth and Proliferation              | 1.64E-05    | DLGAP5,MYH9,CTGF,EIF4EBP2,PDGFA,UNC5B,KLF6,CSRP1,FNDC3B,IQGAP1,SECISBP2,CDKN3,FDFT1,SAE1,EGR2,TIMP1,JUND,LASP1,PLAT,SOX4,COL4A1,TUBB4B,ACTB,FGFR1,YWHAZ,TOB1,HBEGF,AGO2,DDR1,SP4,GNAI2,PDAP1,EXOC4,COL6A3,BTG2,CDKN1A,PSAP,SF1,JAG1,CYR61,LGALS1,PRDX2                                                                                                                                |
| E2F3B upregulated | Visual System Development and Function         | 2.27E-05    | CTGF,TIMP1,PDGFA,FGFR1,CYR61,PLAT,LGALS1                                                                                                                                                                                                                                                                                                                                              |
| E2F3B upregulated | Cell Death and Survival                        | 3.81E-05    | MYH9,CTGF,PDGFA,ATP2B1,KLF6,UNC5B,IQGAP1,CDKN3,FDFT1,EGR2,TIMP1,VAMP3,JUND,PLAT,SOX4,COL4A1,HAUS8,RRBP1,PHLDA3,ACTB,FGFR1,YWHAZ,AGO2,HBEGF,UBE2S,SRXN1,DDR1,GNAI2,FDPS,TUBB6,CDKN1A,BTG2,PSAP,JAG1,CYR61,LGALS1,PRDX2                                                                                                                                                                 |

**Supplemental Table 14. General IPA functions for E2F1 and E2F3B putative direct targets**

|                   | <b>Category</b>                               | <b>B-H p-value</b> | <b>Genes</b>                                                                                                                                                                                                                                                                                  |
|-------------------|-----------------------------------------------|--------------------|-----------------------------------------------------------------------------------------------------------------------------------------------------------------------------------------------------------------------------------------------------------------------------------------------|
| E2F3B upregulated | Reproductive System Disease                   | 3.81E-05           | SQLE,MYH9,CTGF,PDGFA,ATP2B1,KLF6,FNDC3B,SLC35C1,IQGAP1,ZDHHC14,CDKN3,FDFT1,EGR2,WDFY3,TIMP1,JUND,CYP51A1,LASP1,PLAT,SOX4,COL4A1,HAUS8,RRBP1,TUBB4B,FGFR1,PHLDA3,YWHAZ,ZC3HAV1,AGO2,HBEGF,UBE2S,DDR1,PDAP1,GNAI2,FDPS,EXOC4,TUBB6,COL6A3,BTG2,LOXL1,CDKN1A,PDLIM1,SF1,CYR61,JAG1,SAMD4A,LGALS1 |
| E2F3B upregulated | Cellular Assembly and Organization            | 4.53E-05           | DLGAP5,MYH9,RAB5C,CTGF,EIF4EBP2,ATP2B1,PDGFA,UNC5B,CSRP1,IQGAP1,TIMP1,VAMP3,JUND,LASP1,PLAT,HAUS8,RRBP1,ACTB,FGFR1,YWHAZ,DDR1,SP4,GNAI2,COL6A3,EXOC4,BTG2,CDKN1A,PSAP,JAG1,CYR61,LGALS1                                                                                                       |
| E2F3B upregulated | Cellular Function and Maintenance             | 4.53E-05           | DLGAP5,RAB5C,MYH9,CTGF,EIF4EBP2,ATP2B1,PDGFA,UNC5B,CSRP1,FNDC3B,IQGAP1,EGR2,VAMP3,LASP1,PLAT,HAUS8,RRBP1,FGFR1,ACTB,DDR1,SP4,GNAI2,BTG2,CDKN1A,PSAP,JAG1,CYR61,LGALS1                                                                                                                         |
| E2F3B upregulated | Renal and Urological Disease                  | 6.15E-05           | DLGAP5,CTGF,MYH9,ATP2B1,KLF6,SECISBP2,FDFT1,WDFY3,TIMP1,JUND,CYP51A1,PLAT,SLC35A5,COL4A1,TUBB4B,FGFR1,ACTB,PHLDA3,HBEGF,DDR1,SP4,FDPS,COL6A3,PVT1,BTG2,CDKN1A,LOXL1,PDLIM1,PSAP,CYR61,PRDX2                                                                                                   |
| E2F3B upregulated | Inflammatory Response                         | 6.23E-05           | CTGF,MYH9,UNC5B,CSRP1,SLC35C1,EGR2,TIMP1,CYP51A1,PLAT,COL4A1,TUBB4B,ACTB,FGFR1,AGO2,TOB1,HBEGF,DDR1,GNAI2,CDKN1A,PSAP,PDLIM1,CYR61,JAG1,PRDX2,LGALS1                                                                                                                                          |
| E2F3B upregulated | Hereditary Disorder                           | 6.23E-05           | MYH9,COL4A1,CTGF,ATP2B1,FGFR1,ACTB,YWHAZ,FDPS,FDFT1,EGR2,COL6A3,LOXL1,PDLIM1,PSAP,TMEM43,JAG1,CYP51A1,PRDX2                                                                                                                                                                                   |
| E2F3B upregulated | Skeletal and Muscular Disorders               | 6.23E-05           | SQLE,CTGF,PDGFA,ATP2B1,NRM,IQGAP1,FDFT1,EGR2,TIMP1,JUND,CYP51A1,PLAT,SOX4,COL4A1,TUBB4B,FGFR1,ACTB,YWHAZ,HBEGF,DDR1,GNAI2,FDPS,COL6A3,CDKN1A,LOXL1,PDLIM1,TMEM43,CYR61,JAG1,LGALS1,PRDX2                                                                                                      |
| E2F3B upregulated | Hematological Disease                         | 7.54E-05           | MYH9,CTGF,PDGFA,IQGAP1,FDFT1,EGR2,TIMP1,CYP51A1,PLAT,SOX4,COL4A1,TUBB4B,RRBP1,FGFR1,ACTB,YWHAZ,ZC3HAV1,HBEGF,DDR1,FDPS,COL6A3,EXOC4,CDKN1A,BTG2,JAG1,CYR61,LGALS1                                                                                                                             |
| E2F3B upregulated | Cardiovascular Disease                        | 7.54E-05           | SOX4,COL4A1,CTGF,MYH9,TUBB4B,PDGFA,FGFR1,KLF6,HBEGF,DDR1,SP4,GNAI2,TIMP1,CDKN1A,TMEM43,JUND,JAG1,CYR61,SAMD4A,CYP51A1,PRDX2,PLAT                                                                                                                                                              |
| E2F3B upregulated | Gastrointestinal Disease                      | 7.54E-05           | SOX4,DLGAP5,COL4A1,CTGF,TUBB4B,PDGFA,FGFR1,HBEGF,GNAI2,CDKN3,COL6A3,TIMP1,LOXL1,CDKN1A,BTG2,JUND,CYR61,JAG1,CYP51A1,LGALS1,PLAT                                                                                                                                                               |
| E2F3B upregulated | Hepatic System Disease                        | 7.54E-05           | CDKN3,CTGF,COL4A1,PDGFA,TIMP1,FGFR1,CDKN1A,HBEGF,JUND,PLAT                                                                                                                                                                                                                                    |
| E2F3B upregulated | Cell-To-Cell Signaling and Interaction        | 7.81E-05           | MYH9,CTGF,PDGFA,ACTB,FGFR1,KLF6,HBEGF,CSRP1,IQGAP1,GNAI2,EGR2,TIMP1,CDKN1A,CYR61,JAG1,LGALS1,PLAT,PRDX2                                                                                                                                                                                       |
| E2F3B upregulated | Hematological System Development and Function | 7.81E-05           | SOX4,CTGF,COL4A1,MYH9,ACTB,UNC5B,HBEGF,TOB1,CSRP1,SLC35C1,DDR1,GNAI2,EGR2,TIMP1,CDKN1A,VAMP3,PSAP,JUND,CYR61,JAG1,LGALS1,PLAT,PRDX2                                                                                                                                                           |
| E2F3B upregulated | Tissue Development                            | 7.87E-05           | DLGAP5,CTGF,MYH9,EIF4EBP2,PDGFA,UNC5B,CSRP1,SLC35C1,FNDC3B,IQGAP1,SECISBP2,EGR2,TIMP1,JUND,CYP51A1,PLAT,SOX4,COL4A1,RRBP1,ACTB,FGFR1,YWHAZ,AGO2,TOB1,HBEGF,DDR1,SP4,GNAI2,COL6A3,EXOC4,LOXL1,BTG2,CDKN1A,PSAP,CYR61,JAG1,PRDX2,LGALS1                                                         |
| E2F3B upregulated | Endocrine System Disorders                    | 7.97E-05           | CTGF,MYH9,UNC5B,KLF6,FNDC3B,ZDHHC14,CDKN3,EGR2,TIMP1,LASP1,PLAT,COL4A1,TUBB4B,RRBP1,FGFR1,HBEGF,DDR1,GNAI2,PDAP1,FDPS,COL6A3,CDKN1A,BTG2,LOXL1,CYR61,PRDX2                                                                                                                                    |
| E2F3B upregulated | Cellular Development                          | 8.19E-05           | DLGAP5,MYH9,CTGF,EIF4EBP2,PDGFA,UNC5B,KLF6,CSRP1,FNDC3B,IQGAP1,SECISBP2,CDKN3,FDFT1,EGR2,TIMP1,JUND,PLAT,SOX4,COL4A1,RRBP1,FGFR1,ACTB,YWHAZ,AGO2,TOB1,HBEGF,DDR1,SP4,GNAI2,EXOC4,COL6A3,CDKN1A,BTG2,PSAP,JAG1,CYR61,LGALS1,PRDX2                                                              |
| E2F3B upregulated | Cell Morphology                               | 9.12E-05           | CTGF,MYH9,EIF4EBP2,PDGFA,RRBP1,ATP2B1,ACTB,FGFR1,UNC5B,YWHAZ,HBEGF,CSRP1,IQGAP1,DDR1,SP4,EXOC4,TIMP1,CDKN1A,BTG2,PSAP,CYR61,LASP1,LGALS1,PLAT                                                                                                                                                 |
| E2F3B upregulated | Organismal Survival                           | 1.13E-04           | MYH9,CTGF,PDGFA,ATP2B1,KLF6,FNDC3B,SLC35C1,SECISBP2,CDKN3,FDFT1,EGR2,TIMP1,CYP51A1,PLAT,SOX4,COL4A1,FGFR1,ACTB,HBEGF,AGO2,SRXN1,DDR1,SP4,GNAI2,CDKN1A,PSAP,CYR61,JAG1                                                                                                                         |



## Supplemental Table 14. General IPA functions for E2F1 and E2F3B putative direct targets

|                   | Category                                              | B-H p-value | Genes                                                                                                                                                                                      |
|-------------------|-------------------------------------------------------|-------------|--------------------------------------------------------------------------------------------------------------------------------------------------------------------------------------------|
| E2F3B upregulated | Developmental Disorder                                | 1.41E-04    | MYH9,CTGF,PDGFA,SLC35C1,FDFT1,EGR2,TIMP1,CYP51A1,PLAT,SOX4,COL4A1,FGFR1,ACTB,HBEGF,AGO2,DDR1,GNAI2,FDPS,COL6A3,EXOC4,CDKN1A,LOXL1,PSAP,TMEM43,JAG1                                         |
| E2F3B upregulated | Connective Tissue Development and Function            | 1.51E-04    | SOX4,CTGF,PDGFA,FGFR1,ACTB,KLF6,HBEGF,TOB1,FNDC3B,IQGAP1,DDR1,GNAI2,EGR2,TIMP1,BTG2,CDKN1A,JUND,CYR61,JAG1,PLAT,LGALS1                                                                     |
| E2F3B upregulated | Embryonic Development                                 | 2.59E-04    | MYH9,CTGF,EIF4EBP2,PDGFA,KLF6,CSRP1,SLC35C1,FNDC3B,SECISBP2,EGR2,TIMP1,JUND,CYP51A1,PLAT,SOX4,COL4A1,FGFR1,AGO2,HBEGF,DDR1,SP4,COL6A3,CDKN1A,LOXL1,BTG2,PSAP,JAG1,CYR61,LGALS1,PRDX2       |
| E2F3B upregulated | Organ Development                                     | 2.59E-04    | SOX4,CTGF,MYH9,PDGFA,FGFR1,HBEGF,TOB1,SLC35C1,DDR1,EGR2,COL6A3,TIMP1,LOXL1,CDKN1A,PSAP,JUND,CYR61,JAG1,CYP51A1,LGALS1                                                                      |
| E2F3B upregulated | Organ Morphology                                      | 2.59E-04    | SOX4,CTGF,PDGFA,FGFR1,AGO2,HBEGF,SLC35C1,IQGAP1,DDR1,SP4,EGR2,TIMP1,CDKN1A,LOXL1,PSAP,JUND,JAG1,CYP51A1,LASP1,PLAT                                                                         |
| E2F3B upregulated | Nervous System Development and Function               | 2.59E-04    | SOX4,COL4A1,MYH9,EIF4EBP2,FGFR1,ACTB,YWHAZ,CSRP1,HBEGF,IQGAP1,SECISBP2,DDR1,SP4,GNAI2,EGR2,EXOC4,CDKN1A,BTG2,PSAP,JAG1,CYR61,LGALS1,PLAT                                                   |
| E2F3B upregulated | Respiratory System Development and Function           | 2.59E-04    | SOX4,CTGF,PDGFA,FGFR1,CDKN1A,LOXL1,HBEGF,SLC35C1,LGALS1                                                                                                                                    |
| E2F3B upregulated | Digestive System Development and Function             | 3.98E-04    | CTGF,PDGFA,FGFR1,TOB1,HBEGF,IQGAP1,GNAI2,TIMP1,LOXL1,CDKN1A,PSAP,JUND,JAG1,CYP51A1,LGALS1                                                                                                  |
| E2F3B upregulated | Hepatic System Development and Function               | 3.98E-04    | CTGF,TIMP1,CDKN1A,HBEGF,TOB1,JUND,LGALS1                                                                                                                                                   |
| E2F3B upregulated | Dermatological Diseases and Conditions                | 5.21E-04    | SQLE,COL4A1,COL6A3,LOXL1,PSAP,JAG1,CYP51A1                                                                                                                                                 |
| E2F3B upregulated | Infectious Diseases                                   | 5.21E-04    | SOX4,SQLE,RAB5C,EIF4EBP2,HMGN2,TUBB4B,FGFR1,ACTB,ZC3HAV1,AGO2,FDPS,SAE1,TIMP1,PVT1,BTG2,VAMP3,CYP51A1,LGALS1,PLAT,PRDX2                                                                    |
| E2F3B upregulated | Connective Tissue Disorders                           | 5.89E-04    | SQLE,MYH9,CTGF,PDGFA,UNC5B,NRM,FDFT1,EGR2,TIMP1,JUND,CYP51A1,PLAT,SOX4,COL4A1,TUBB4B,FGFR1,ACTB,YWHAZ,HBEGF,DDR1,FDPS,GNAI2,COL6A3,CDKN1A,JAG1,CYR61,PRDX2,LGALS1                          |
| E2F3B upregulated | Neurological Disease                                  | 6.27E-04    | CTGF,MYH9,ATP2B1,KLF6,UNC5B,CDKN3,FDFT1,EGR2,WDFY3,TIMP1,CYP51A1,PLAT,SOX4,COL4A1,TUBB4B,FGFR1,ACTB,YWHAZ,AGO2,TOB1,HBEGF,FDPS,COL6A3,PVT1,BTG2,CDKN1A,PDLIM1,PSAP,CYR61,JAG1,PRDX2,LGALS1 |
| E2F3B upregulated | Skeletal and Muscular System Development and Function | 7.20E-04    | SOX4,MYH9,CTGF,PDGFA,RRBP1,FGFR1,TOB1,HBEGF,FNDC3B,DDR1,COL6A3,TIMP1,CDKN1A,JUND,SF1,JAG1,CYR61,PLAT                                                                                       |
| E2F3B upregulated | Inflammatory Disease                                  | 8.97E-04    | SQLE,MYH9,CTGF,NRM,FDFT1,EGR2,WDFY3,TIMP1,VAMP3,CYP51A1,PLAT,COL4A1,TUBB4B,FGFR1,AGO2,TOB1,HBEGF,DDR1,GNAI2,FDPS,COL6A3,CDKN1A,LOXL1,PDLIM1,JAG1,LGALS1,PRDX2                              |
| E2F3B upregulated | Respiratory Disease                                   | 1.13E-03    | SOX4,MYH9,TUBB4B,FGFR1,ACTB,YWHAZ,AGO2,DDR1,FDPS,FDFT1,TIMP1,CDKN1A,VAMP3,CYR61,CYP51A1,PRDX2,LGALS1,PLAT                                                                                  |

## Supplemental Table 14. General IPA functions for E2F1 and E2F3B putative direct targets

|                   | Category                                             | B-H p-value | Genes                                                                                                                                                        |
|-------------------|------------------------------------------------------|-------------|--------------------------------------------------------------------------------------------------------------------------------------------------------------|
| E2F3B upregulated | Gene Expression                                      | 1.13E-03    | CTGF,EIF4EBP2,PDGFA,KLF6,IQGAP1,EGR2,TIMP1,JUND,SOX4,HMG2,RRBP1,FGFR1,YWHAZ,ZC3HAV1,TOB1,AGO2,HBEGF,SP4,PVT1,CDKN1A,BTG2,PDLIM1,JAG1,CYR61,SAMD4A,LGALS1     |
| E2F3B upregulated | Tissue Morphology                                    | 1.13E-03    | CTGF,MYH9,EIF4EBP2,PDGFA,KLF6,SLC35C1,IQGAP1,FDFT1,EGR2,TIMP1,PLAT,SOX4,COL4A1,FGFR1,HBEGF,AGO2,TOB1,DDR1,SP4,FDPS,GNAI2,LOXL1,CDKN1A,PSAP,JAG1,PRDX2,LGALS1 |
| E2F3B upregulated | Immune Cell Trafficking                              | 1.13E-03    | MYH9,COL4A1,CTGF,FGFR1,ACTB,UNC5B,DDR1,GNAI2,EGR2,TIMP1,CDKN1A,CYR61,LGALS1,PLAT                                                                             |
| E2F3B upregulated | Metabolic Disease                                    | 1.13E-03    | MYH9,CTGF,COL4A1,FGFR1,ACTB,YWHAZ,HBEGF,FDPS,FDFT1,WDFY3,TIMP1,BTG2,PSAP,LGALS1,PLAT                                                                         |
| E2F3B upregulated | Psychological Disorders                              | 1.13E-03    | MYH9,CTGF,TUBB4B,ATP2B1,ACTB,FGFR1,YWHAZ,TOB1,FNDC3B,UBE2S,FDPS,FDFT1,EGR2,WDFY3,TIMP1,BTG2,PSAP,PDLIM1,CYP51A1,PLAT,LGALS1,PRDX2                            |
| E2F3B upregulated | Immunological Disease                                | 1.47E-03    | MYH9,COL4A1,TUBB4B,FGFR1,YWHAZ,HBEGF,AGO2,TOB1,IQGAP1,EGR2,TIMP1,CDKN1A,BTG2,PDLIM1,JAG1,CYR61,CYP51A1,PLAT,LGALS1                                           |
| E2F3B upregulated | Protein Synthesis                                    | 1.81E-03    | SOX4,EIF4EBP2,RRBP1,BTG2,AGO2,TOB1,SAMD4A                                                                                                                    |
| E2F3B upregulated | Small Molecule Biochemistry                          | 2.77E-03    | SQLE,PDGFA,FGFR1,IQGAP1,FDPS,GNAI2,FDFT1,TIMP1,CDKN1A,PSAP,CYP51A1,PRDX2,LGALS1                                                                              |
| E2F3B upregulated | Lipid Metabolism                                     | 2.77E-03    | FDPS,FDFT1,SQLE,PDGFA,TIMP1,FGFR1,CDKN1A,PSAP,CYP51A1,PRDX2                                                                                                  |
| E2F3B upregulated | Renal and Urological System Development and Function | 3.10E-03    | SOX4,TIMP1,FGFR1,CDKN1A,HBEGF,PSAP,JAG1                                                                                                                      |
| E2F3B upregulated | Tumor Morphology                                     | 3.68E-03    | TIMP1,FGFR1,KLF6,BTG2,CDKN1A,HBEGF,IQGAP1,CYR61,JAG1,PLAT,LGALS1                                                                                             |
| E2F3B upregulated | Hair and Skin Development and Function               | 5.68E-03    | GNAI2,DLGAP5,CTGF,TIMP1,FGFR1,CDKN1A,UNC5B,HBEGF,CYR61                                                                                                       |
| E2F3B upregulated | DNA Replication, Recombination, and Repair           | 6.00E-03    | GNAI2,DLGAP5,PDGFA,FGFR1,CDKN1A,HBEGF,CYR61,IQGAP1,LGALS1                                                                                                    |
| E2F3B upregulated | Cell Cycle                                           | 6.98E-03    | DLGAP5,HAUS8,FGFR1,KLF6,HBEGF,UBE2S,CDKN3,TIMP1,CDKN1A,BTG2,PSAP,CYR61,LGALS1                                                                                |
| E2F3B upregulated | Ophthalmic Disease                                   | 7.58E-03    | COL4A1,TIMP1,ACTB,LOXL1,CDKN1A,JAG1,CYP51A1,LGALS1                                                                                                           |
| E2F3B upregulated | Cell-mediated Immune Response                        | 7.80E-03    | GNAI2,MYH9,COL4A1,EGR2,ACTB,CDKN1A,LGALS1                                                                                                                    |
| E2F3B upregulated | Vitamin and Mineral Metabolism                       | 8.11E-03    | FDPS,FDFT1,SQLE,CYP51A1                                                                                                                                      |
| E2F3B upregulated | Organismal Functions                                 | 8.45E-03    | PDGFA,FGFR1,KLF6,HBEGF,PLAT                                                                                                                                  |
| E2F3B upregulated | Hematopoiesis                                        | 9.60E-03    | EGR2,CDKN1A                                                                                                                                                  |
| E2F3B upregulated | Lymphoid Tissue Structure and Development            | 9.60E-03    | EGR2,CDKN1A                                                                                                                                                  |
| E2F3B upregulated | Cell Signaling                                       | 1.21E-02    | GNAI2,SAE1,CTGF,PDGFA,FGFR1,CDKN1A,ZC3HAV1,PSAP,CYR61,IQGAP1,PRDX2,LGALS1                                                                                    |
| E2F3B upregulated | Nucleic Acid Metabolism                              | 1.58E-02    | GNAI2,IQGAP1,LGALS1                                                                                                                                          |

**Supplemental Table 14. General IPA functions for E2F1 and E2F3B putative direct targets**

|                    | <b>Category</b>                                         | <b>B-H p-value</b> | <b>Genes</b>                                      |
|--------------------|---------------------------------------------------------|--------------------|---------------------------------------------------|
| E2F3B upregulated  | Auditory and Vestibular System Development and Function | 1.58E-02           | EGR2,PSAP,DDR1,PLAT                               |
| E2F3B upregulated  | Cellular Compromise                                     | 1.80E-02           | FGFR1,HBEGF,PSAP,PLAT                             |
| E2F3B upregulated  | Reproductive System Development and Function            | 1.82E-02           | PDGFA,HBEGF,PSAP,JUND,LASP1                       |
| E2F3B upregulated  | Post-Translational Modification                         | 1.82E-02           | GNAI2,CDKN1A,CYR61,IQGAP1,PRDX2                   |
| E2F3B upregulated  | Molecular Transport                                     | 1.82E-02           | TIMP1,CDKN1A,PSAP                                 |
| E2F3B upregulated  | Carbohydrate Metabolism                                 | 1.82E-02           | PSAP                                              |
| E2F3B upregulated  | Drug Metabolism                                         | 1.82E-02           | TIMP1,CDKN1A,PSAP                                 |
| E2F3B upregulated  | Endocrine System Development and Function               | 1.82E-02           | TIMP1,CDKN1A,PSAP                                 |
| E2F3B upregulated  | Auditory Disease                                        | 1.82E-02           | MYH9,ACTB,PSAP,JAG1                               |
| E2F3B upregulated  | Nutritional Disease                                     | 1.82E-02           | GNAI2,EGR2,TIMP1,CDKN1A,PSAP                      |
| E2F1 downregulated | Organismal Injury and Abnormalities                     | 1.59E-02           | SCO2,RFX4,SDC1,POLG2,DLST,ALS2,BAG4               |
| E2F1 downregulated | Cellular Function and Maintenance                       | 1.59E-02           | SCO2,SDC1,DLST,ALS2,BAG4                          |
| E2F1 downregulated | Hereditary Disorder                                     | 1.59E-02           | SCO2,SDC1,POLG2,ALS2                              |
| E2F1 downregulated | Skeletal and Muscular Disorders                         | 1.59E-02           | SCO2,SDC1,POLG2,ALS2                              |
| E2F1 downregulated | Neurological Disease                                    | 1.59E-02           | SCO2,RFX4,SDC1,POLG2,PCOLCE2,ALS2                 |
| E2F1 downregulated | Molecular Transport                                     | 1.59E-02           | PANK1,SDC1,PCOLCE2,SHMT1,SLC29A1,PITPNB           |
| E2F1 downregulated | Nucleic Acid Metabolism                                 | 1.59E-02           | PANK1,DLST,SHMT1,SLC29A1                          |
| E2F1 downregulated | Small Molecule Biochemistry                             | 1.59E-02           | PANK1,SDC1,DLST,PCOLCE2,SHMT1,SLC29A1,BAG4,PITPNB |
| E2F1 downregulated | Amino Acid Metabolism                                   | 1.59E-02           | PANK1,SHMT1,SLC29A1                               |
| E2F1 downregulated | Vitamin and Mineral Metabolism                          | 1.59E-02           | PANK1,SHMT1                                       |
| E2F1 downregulated | Behavior                                                | 1.59E-02           | ALS2,SLC29A1                                      |
| E2F1 downregulated | Ophthalmic Disease                                      | 1.59E-02           | SCO2,POLG2                                        |

## Supplemental Table 14. General IPA functions for E2F1 and E2F3B putative direct targets

| Category                                                                 | B-H p-value | Genes                          |
|--------------------------------------------------------------------------|-------------|--------------------------------|
| E2F1 downregulated Cellular Growth and Proliferation                     | 2.32E-02    | SDC1,ALS2,SLC29A1              |
| E2F1 downregulated Cancer                                                | 2.32E-02    | SDC1                           |
| E2F1 downregulated Tumor Morphology                                      | 2.32E-02    | SDC1                           |
| E2F1 downregulated Cellular Movement                                     | 2.32E-02    | SDC1,PCOLCE2,ALS2,BAG4         |
| E2F1 downregulated Inflammatory Response                                 | 2.32E-02    | SDC1,PCOLCE2,SLC29A1,ALS2,BAG4 |
| E2F1 downregulated Hematological System Development and Function         | 2.32E-02    | SDC1,PCOLCE2,SLC29A1,BAG4      |
| E2F1 downregulated Immune Cell Trafficking                               | 2.32E-02    | SDC1,PCOLCE2,BAG4              |
| E2F1 downregulated Carbohydrate Metabolism                               | 2.32E-02    | BAG4,PITPNB                    |
| E2F1 downregulated Organismal Functions                                  | 2.32E-02    | SDC1                           |
| E2F1 downregulated Cellular Assembly and Organization                    | 2.76E-02    | SDC1,POLG2,ALS2,BAG4           |
| E2F1 downregulated Connective Tissue Disorders                           | 2.76E-02    | SDC1                           |
| E2F1 downregulated Immunological Disease                                 | 2.76E-02    | SDC1                           |
| E2F1 downregulated Developmental Disorder                                | 2.76E-02    | SCO2,RFX4,SDC1,ALS2            |
| E2F1 downregulated Digestive System Development and Function             | 2.76E-02    | PANK1,SHMT1                    |
| E2F1 downregulated Hepatic System Development and Function               | 2.76E-02    | PANK1,SHMT1                    |
| E2F1 downregulated Organ Development                                     | 2.76E-02    | PANK1,RFX4,SDC1,SHMT1          |
| E2F1 downregulated Skeletal and Muscular System Development and Function | 2.76E-02    | SDC1,ALS2                      |
| E2F1 downregulated Cell-To-Cell Signaling and Interaction                | 2.76E-02    | SDC1,SLC29A1,ALS2              |
| E2F1 downregulated Cardiovascular Disease                                | 2.76E-02    | SCO2,SDC1,BAG4                 |
| E2F1 downregulated Drug Metabolism                                       | 2.76E-02    | SHMT1,SLC29A1                  |
| E2F1 downregulated Metabolic Disease                                     | 2.76E-02    | SCO2,SDC1                      |
| E2F1 downregulated Inflammatory Disease                                  | 2.76E-02    | SDC1                           |
| E2F1 downregulated Cell Morphology                                       | 2.87E-02    | SDC1,POLG2,ALS2                |
| E2F1 downregulated Lipid Metabolism                                      | 2.87E-02    | PANK1,SDC1,PCOLCE2,BAG4,PITPNB |

## Supplemental Table 14. General IPA functions for E2F1 and E2F3B putative direct targets

| Category                                                                | B-H p-value | Genes                       |
|-------------------------------------------------------------------------|-------------|-----------------------------|
| E2F1 downregulated Nutritional Disease                                  | 2.87E-02    | PANK1,SDC1                  |
| E2F1 downregulated Infectious Diseases                                  | 2.87E-02    | PANK1,SDC1,DLST             |
| E2F1 downregulated Psychological Disorders                              | 2.87E-02    | PANK1,SDC1,SLC29A1          |
| E2F1 downregulated Embryonic Development                                | 3.27E-02    | RFX4,SDC1,DLST,BAG4         |
| E2F1 downregulated Tissue Development                                   | 3.27E-02    | RFX4,SDC1,ALS2              |
| E2F1 downregulated Organ Morphology                                     | 3.27E-02    | RFX4,SDC1,ALS2              |
| E2F1 downregulated Post-Translational Modification                      | 3.27E-02    | SCO2,SHMT1                  |
| E2F1 downregulated Nervous System Development and Function              | 3.27E-02    | RFX4,SLC29A1,ALS2           |
| E2F1 downregulated Organismal Development                               | 3.27E-02    | RFX4,SDC1,ALS2              |
| E2F1 downregulated Protein Synthesis                                    | 3.27E-02    | SCO2,SHMT1,BAG4             |
| E2F1 downregulated Cell Signaling                                       | 3.27E-02    | SCO2,ALS2                   |
| E2F1 downregulated Cellular Development                                 | 4.06E-02    | SDC1,ALS2,SLC29A1           |
| E2F1 downregulated DNA Replication, Recombination, and Repair           | 4.06E-02    | POLG2,SLC29A1               |
| E2F1 downregulated Free Radical Scavenging                              | 4.26E-02    | SCO2,DLST,ALS2              |
| E2F1 downregulated Auditory Disease                                     | 4.44E-02    | SDC1                        |
| E2F1 downregulated Cell Death and Survival                              | 4.55E-02    | SDC1,DLST,SLC29A1,ALS2,BAG4 |
| E2F1 downregulated Tissue Morphology                                    | 4.55E-02    | SDC1,ALS2                   |
| E2F1 downregulated Cellular Compromise                                  | 4.55E-02    | SDC1,ALS2                   |
| E2F1 downregulated Cardiovascular System Development and Function       | 5.44E-02    | SDC1,BAG4                   |
| E2F1 downregulated Renal and Urological System Development and Function | 6.14E-02    | SDC1                        |
| E2F1 downregulated Renal and Urological Disease                         | 8.14E-02    | DLST,BAG4                   |
| E2F1 downregulated Reproductive System Disease                          | 8.45E-02    | SDC1                        |
| E2F1 downregulated Reproductive System Development and Function         | 8.96E-02    | SDC1                        |

## Supplemental Table 14. General IPA functions for E2F1 and E2F3B putative direct targets

| Category                                                      | B-H p-value | Genes                                                                                                                                                                                                                                                                                                                                                                                                                                                                                                                                                                                                                                                                                                                                                                                                                                                                                                                                                                                                                 |
|---------------------------------------------------------------|-------------|-----------------------------------------------------------------------------------------------------------------------------------------------------------------------------------------------------------------------------------------------------------------------------------------------------------------------------------------------------------------------------------------------------------------------------------------------------------------------------------------------------------------------------------------------------------------------------------------------------------------------------------------------------------------------------------------------------------------------------------------------------------------------------------------------------------------------------------------------------------------------------------------------------------------------------------------------------------------------------------------------------------------------|
| E2F1 downregulated Connective Tissue Development and Function | 9.47E-02    | SDC1                                                                                                                                                                                                                                                                                                                                                                                                                                                                                                                                                                                                                                                                                                                                                                                                                                                                                                                                                                                                                  |
| E2F1 downregulated Humoral Immune Response                    | 9.91E-02    | SDC1                                                                                                                                                                                                                                                                                                                                                                                                                                                                                                                                                                                                                                                                                                                                                                                                                                                                                                                                                                                                                  |
| E2F3B downregulate Cancer                                     | 4.46E-04    | CCP110,GTF3C2,SLC35E3,SMARCD2,SFPQ,GTPBP10,SLC15A4,KPNA1,RICTOR,TOMM70A,ADRB3,RCL1,IPMK,FAM91A1,KIF13A,PRPF4B,TARDBP,HIPK1,AHCY,ALDH7A1,AFMID,SERBP1,PABPC1,WAPL,DPY19L1,SYNCRIP,AGFG2,MON2,ERCC6L2,ARHGAP5,MTMR4,PPP2R3A,YTHDF3,ACY1,FBXO30,AHCTF1,KIAA0368,ZNF644,RBM39,PHLPP1,TRIM33,NOL7,AKAP8,TRIP4,EIF4G1,TYW1,XYLB,RIF1,ADK,SOS1,EIF3A,MCM10,XPO4,LPP,FBXO21,UBE3C,PAICS,RETSAT,TGS1,SIN3A,SF3B2,NUP153,IREB2,TCF7L2,TAF15,AKAP1,NAV2,PRPF19,MSH3,KIF1B,VPS13A,TAF10,STARD7,RBM33,LATS2,USF3,HSPA4,GSPT1,ADGRF5,TBC1D4,ZNF318,SMPD4,RORA,GDE1,AP5M1,NEO1,DDI2,NAA16,TFDP2,LACTB,SYNE2,UBE4B,DLEU2,USP38,TNPO1,MACROD1,BIRC6,GPAT4,ELF1,ZBTB44,ARIH1,CAND1,TTC14,WHSC1L1,NASP,UGP2,AGBL3,CUTC,BAZ1B,MCCC2,PEBP1,TMTC3,NFIX,PA2G4,XPNEP3,GTF2I,TLE2,PPP1CB,ATF6,TAOK1,GPHN,MARVELD1,PDP2,EPHB6,LYST,STEAP2,ZNF24,MCCC1,PKD1,RAD23B,UBR5,ABCD3,AP3M1,MTRR,TMEM245,HERPUD1,MTHFD1,ALS2,MTO1,ZHX3,XIAP,CDKN2AIP,U2SURP,CHD9,PAN3,TTC7A,AMIGO1,TANGO2,ACAT1,SLC25A32,NFIB,SMARCC1,USP34,ACSL1                        |
| E2F3B downregulate Organismal Injury and Abnormalities        | 4.46E-04    | CCP110,GTF3C2,SFPQ,SMARCD2,SLC35E3,GTPBP10,RICTOR,KPNA1,SLC15A4,TOMM70A,ADRB3,RCL1,IPMK,FAM91A1,KIF13A,PRPF4B,TARDBP,HIPK1,ALDH7A1,AHCY,AFMID,PABPC1,SERBP1,WAPL,SLC35A3,DPY19L1,SYNCRIP,MON2,AGFG2,ERCC6L2,ARHGAP5,MTMR4,PPP2R3A,YTHDF3,ACY1,AHCTF1,FBXO30,KIAA0368,ZNF644,RBM39,PHLPP1,TRIM33,NOL7,AKAP8,TRIP4,EIF4G1,TYW1,XYLB,RIF1,ADK,SOS1,EIF3A,MCM10,B3GALNT2,XPO4,LPP,FBXO21,UBE3C,MEMO1,PAICS,TGS1,RETSAT,SIN3A,NUP153,SF3B2,IREB2,TCF7L2,TAF15,AKAP1,NAV2,PRPF19,KIF1B,MSH3,VPS13A,TAF10,STARD7,RBM33,LATS2,USF3,HSPA4,GSPT1,ADGRF5,TBC1D4,ZNF318,SMPD4,RORA,GDE1,AP5M1,NEO1,DDI2,NAA16,TFDP2,LACTB,SYNE2,UBE4B,DLEU2,MACROD1,TNPO1,USP38,BIRC6,GPAT4,ZBTB44,ELF1,CAND1,ARIH1,TTC14,WHSC1L1,NASP,UGP2,AGBL3,CUTC,BAZ1B,MCCC2,PEBP1,TMTC3,NFIX,PA2G4,XPNEP3,GTF2I,TLE2,PPP1CB,ATF6,GPHN,TAOK1,MARVELD1,PDP2,EPHB6,LYST,STEAP2,ZNF24,MCCC1,PKD1,RAD23B,UBR5,ABCD3,AP3M1,MTRR,TMEM245,HERPUD1,MTHFD1,ALS2,MTO1,XIAP,ZHX3,CDKN2AIP,CHD9,U2SURP,PAN3,TTC7A,AMIGO1,TANGO2,ACAT1,SLC25A32,NFIB,SMARCC1,USP34,ACSL1 |
| E2F3B downregulate Renal and Urological Disease               | 4.46E-04    | NAV2,TRIM33,AKAP8,XPNEP3,GTF3C2,KIF1B,VPS13A,SLC35E3,SMARCD2,GPHN,LATS2,TYW1,ADRB3,XYLB,EPHB6,GSPT1,LYST,AP5M1,MCCC1,ALDH7A1,UBE3C,UBR5,PABPC1,MTRR,SYNE2,DPY19L1,ZHX3,SIN3A,ARHGAP5,ARIH1,NASP,NUP153,UGP2,CHD9,ACAT1,SMARCC1,USP34,MCCC2,PHLPP1                                                                                                                                                                                                                                                                                                                                                                                                                                                                                                                                                                                                                                                                                                                                                                     |
| E2F3B downregulate Tissue Morphology                          | 1.07E-02    | NFIX,VPS13A,GPHN,TAF10,RICTOR,ADRB3,IPMK,TBC1D4,RORA,TARDBP,ZNF24,MCM10,HIPK1,RAD23B,MEMO1,SYNE2,UBE4B,BIRC6,SYNCRIP,GPAT4,ALS2,TGS1,XIAP,ARHGAP5,AHCTF1,SMARCC1,IREB2,TCF7L2,ACSL1                                                                                                                                                                                                                                                                                                                                                                                                                                                                                                                                                                                                                                                                                                                                                                                                                                   |
| E2F3B downregulate Organismal Development                     | 1.07E-02    | NOL7,PRPF19,NFIX,AKAP8,KIF1B,GTF2I,VPS13A,PPP1CB,GPHN,TAF10,RICTOR,LATS2,KPNA1,RCL1,RORA,SOS1,MCM10,HIPK1,RAD23B,UBE4B,BIRC6,SYNCRIP,GPAT4,TGS1,ALS2,XIAP,ARHGAP5,NUP153,AHCTF1,NFIB,SMARCC1,IREB2,TCF7L2                                                                                                                                                                                                                                                                                                                                                                                                                                                                                                                                                                                                                                                                                                                                                                                                             |
| E2F3B downregulate Hematological Disease                      | 1.22E-02    | NAV2,NFIX,AKAP8,KIF1B,MSH3,VPS13A,GPHN,EIF4G1,RBM33,ADRB3,ZC3H8,IPMK,RIF1,RORA,STEAP2,ADK,PKD1,LPP,AHCY,UBE3C,MTRR,SYNE2,DLEU2,BIRC6,MTHFD1,ALS2,XIAP,ELF1,ARIH1,WHSC1L1,MTMR4,CHD9,AHCTF1,FBXO30,SLC25A32,SMARCC1,IREB2,USP34                                                                                                                                                                                                                                                                                                                                                                                                                                                                                                                                                                                                                                                                                                                                                                                        |
| E2F3B downregulate Developmental Disorder                     | 1.22E-02    | TRIM33,PRPF19,NFIX,AKAP8,GPHN,LATS2,ADRB3,ADK,SOS1,ZNF24,TARDBP,MCM10,MCCC1,B3GALNT2,TFDP2,HIPK1,RAD23B,AHCY,MEMO1,SYNE2,MTRR,SLC35A3,MTHFD1,ALS2,NASP,TTC7A,ACAT1,NFIB,SMARCC1,IREB2,TCF7L2,MCCC2                                                                                                                                                                                                                                                                                                                                                                                                                                                                                                                                                                                                                                                                                                                                                                                                                    |
| E2F3B downregulate Hereditary Disorder                        | 1.22E-02    | XPNEP3,KIF1B,VPS13A,ATF6,GPHN,EIF4G1,ADRB3,LYST,SOS1,TARDBP,ADK,MCCC1,B3GALNT2,TFDP2,AHCY,ALDH7A1,MTRR,SYNE2,SLC35A3,ALS2,MTO1,XIAP,ACY1,TTC7A,ACAT1,ZNF644,MCCC2                                                                                                                                                                                                                                                                                                                                                                                                                                                                                                                                                                                                                                                                                                                                                                                                                                                     |
| E2F3B downregulate Metabolic Disease                          | 1.22E-02    | MTRR,GPHN,MTO1,ADRB3,RORA,STEAP2,ADK,ACY1,TARDBP,ACAT1,MCCC1,B3GALNT2,PKD1,TCF7L2,MCCC2,AHCY                                                                                                                                                                                                                                                                                                                                                                                                                                                                                                                                                                                                                                                                                                                                                                                                                                                                                                                          |

## Supplemental Table 14. General IPA functions for E2F1 and E2F3B putative direct targets

| Category                                                      | B-H p-value | Genes                                                                                                                                                                                                                                                                                                                                                                                                                                                                                                                                                                                                                                                                                                                                                                                                                 |
|---------------------------------------------------------------|-------------|-----------------------------------------------------------------------------------------------------------------------------------------------------------------------------------------------------------------------------------------------------------------------------------------------------------------------------------------------------------------------------------------------------------------------------------------------------------------------------------------------------------------------------------------------------------------------------------------------------------------------------------------------------------------------------------------------------------------------------------------------------------------------------------------------------------------------|
| E2F3B downregulate Nucleic Acid Metabolism                    | 1.39E-02    | ABCD3,SLC35A3,RICTOR,MTHFD1,GPAT4,EPHB6,UGP2,RORA,ADK,B3GALNT2,MCCC2,AHGY,PHLPP1                                                                                                                                                                                                                                                                                                                                                                                                                                                                                                                                                                                                                                                                                                                                      |
| E2F3B downregulate Small Molecule Biochemistry                | 1.39E-02    | PEBP1,ATF6,TAF10,SLC15A4,ADRB3,XYLB,EPHB6,SMPD4,ADK,B3GALNT2,PK1,AHGY,AFMID,ABCD3,MTRR,SLC35A3,MTHFD1,GPAT4,UGP2,TTC7A,ACAT1,SLC25A32,IREB2,ACSL1,PHLPP1,MCCC2                                                                                                                                                                                                                                                                                                                                                                                                                                                                                                                                                                                                                                                        |
| E2F3B downregulate Carbohydrate Metabolism                    | 1.39E-02    | XYLB,MTRR,SMPD4,UGP2,SLC35A3,PPP1CB,ATF6,TAF10,B3GALNT2,GPAT4                                                                                                                                                                                                                                                                                                                                                                                                                                                                                                                                                                                                                                                                                                                                                         |
| E2F3B downregulate Reproductive System Disease                | 2.80E-02    | NAV2,CCP110,MSH3,VPS13A,SMARCD2,STARD7,KPNA1,RBM33,RICTOR,TOMM70A,ADRB3,USF3,TBC1D4,ZNF318,FAM91A1,RORA,KIF13A,PRPF4B,TARDBP,NEO1,HIPK1,ALDH7A1,LACTB,PABPC1,WAPL,SYNE2,USP38,TNPO1,BIRC6,MON2,ERCC6L2,ELF1,ZBTB44,CAND1,NASP,UGP2,ACY1,AHCTF1,ZNF644,BAZ1B,RBM39,TMTC3,NOL7,NFIX,PPP1CB,ATF6,TRIP4,GPHN,EIF4G1,MARVELD1,TYW1,XYLB,EPHB6,LYST,RIF1,ZNF24,SOS1,EIF3A,MCCC1,XPO4,LPP,UBE3C,UBR5,MEMO1,TMEM245,ALS2,MTO1,TGSI,XIAP,SIN3A,NUP153,CHD9,PAN3,IREB2,USP34,ACSL1                                                                                                                                                                                                                                                                                                                                              |
| E2F3B downregulate DNA Replication, Recombination, and Repair | 3.41E-02    | TRIM33,PRPF19,MSH3,SFPQ,SMARCD2,TAOK1,KPNA1,EIF4G1,IPMK,RIF1,ADK,EIF3A,MCM10,HIPK1,RAD23B,AHGY,UBR5,PABPC1,WAPL,ABCD3,MACROD1,CDKN2AIP,SF3B2,BAZ1B,SMARCC1                                                                                                                                                                                                                                                                                                                                                                                                                                                                                                                                                                                                                                                            |
| E2F3B downregulate Organ Morphology                           | 3.41E-02    | NFIX,UBE4B,KIF1B,GTF2I,VPS13A,SYNCRIP,KPNA1,RICTOR,LATS2,ALS2,ARHGAP5,RORA,NFIB,SMARCC1,IREB2,RAD23B,TCF7L2                                                                                                                                                                                                                                                                                                                                                                                                                                                                                                                                                                                                                                                                                                           |
| E2F3B downregulate Nervous System Development and Function    | 3.41E-02    | NFIX,KIF1B,VPS13A,PPP1CB,SFPQ,GPHN,RICTOR,LATS2,RORA,TARDBP,ZNF24,AHGY,SYNE2,AP3M1,UBE4B,SYNCRIP,HNRNP,ALS2,XIAP,ARHGAP5,AMIGO1,NFIB,SMARCC1,IREB2,TCF7L2,PHLPP1                                                                                                                                                                                                                                                                                                                                                                                                                                                                                                                                                                                                                                                      |
| E2F3B downregulate Lipid Metabolism                           | 3.46E-02    | PEBP1,ABCD3,SMPD4,ACAT1,ATF6,TAF10,PK1,GPAT4,ACSL1,ADRB3                                                                                                                                                                                                                                                                                                                                                                                                                                                                                                                                                                                                                                                                                                                                                              |
| E2F3B downregulate Cell Cycle                                 | 3.80E-02    | UBR5,PABPC1,TRIM33,WAPL,CCP110,NFIX,PRPF19,MSH3,GTF2I,BIRC6,SMARCD2,SFPQ,TAF10,LATS2,KPNA1,GSPT1,NASP,SF3B2,KIF13A,AHCTF1,MCM10,BAZ1B,SMARCC1,PK1                                                                                                                                                                                                                                                                                                                                                                                                                                                                                                                                                                                                                                                                     |
| E2F3B downregulate Cell Death and Survival                    | 3.80E-02    | PEBP1,TRIM33,CCP110,PRPF19,NFIX,PA2G4,KIF1B,MSH3,AP2B1,VPS13A,PPP1CB,SFPQ,ATF6,GPHN,TAF10,EIF4G1,RICTOR,ATS2,EPHB6,HSPA4,ZC3H8,IPMK,SMPD4,ADK,TARDBP,EIF3A,MCM10,PK1,RAD23B,MEMO1,WAPL,UBE4B,BIRC6,HERPUD1,ALS2,SIN3A,XIAP,PPP2R3A,AHCTF1,NFIB,SMARCC1,IREB2,TCF7L2,AKAP1,PHLPP1                                                                                                                                                                                                                                                                                                                                                                                                                                                                                                                                      |
| E2F3B downregulate Embryonic Development                      | 3.80E-02    | UBR5,TRIM33,NOL7,PRPF19,NFIX,TAF10,RICTOR,XIAP,NASP,NUP153,IPMK,RORA,SOS1,ZNF24,TARDBP,AHCTF1,MCM10,NFIB,SMARCC1,HIPK1,RAD23B,TCF7L2                                                                                                                                                                                                                                                                                                                                                                                                                                                                                                                                                                                                                                                                                  |
| E2F3B downregulate Gastrointestinal Disease                   | 3.80E-02    | CCP110,GTF3C2,SFPQ,GTPBP10,SLC15A4,KPNA1,RICTOR,TOMM70A,ADRB3,RCL1,FAM91A1,KIF13A,PRPF4B,TARDBP,HIPK1,AHGY,ALDH7A1,SERBP1,PABPC1,SYNCRIP,MON2,AGFG2,ERCC6L2,ARHGAP5,MTMR4,PPP2R3A,YTHDF3,ACY1,AHCTF1,FBXO30,KIAA0368,ZNF644,RBM39,PHLPP1,NOL7,TRIM33,EIF4G1,TYW1,XYLB,RIF1,SOS1,ADK,EIF3A,MCM10,XPO4,LPP,FBXO21,UBE3C,PAICS,TGSI,RETSAT,SIN3A,NUP153,SF3B2,IREB2,TCF7L2,AKAP1,NAV2,KIF1B,MSH3,VPS13A,TAF10,STARD7,LATS2,RBM33,USF3,GSPT1,TBC1D4,SMPD4,ZNF318,RORA,GDE1,NEO1,DDI2,NAA16,TFDP2,LACTB,SYNE2,UBE4B,USP38,MACROD1,TNPO1,BIRC6,ELF1,ARIH1,TTC14,WHSC1L1,NASP,UGP2,AGBL3,CUTC,BAZ1B,MCCC2,TMTC3,NFIX,PA2G4,XPNPEP3,TLE2,PPP1CB,ATF6,TAOK1,PDP2,LYST,STEAP2,ZNF24,MCCC1,PK1,UBR5,ABCD3,AP3M1,MTRR,TMEM245,HERPUD1,MTHFD1,MTO1,ALS2,ZHX3,CDKN2AIP,U2SURP,CHD9,PAN3,TTC7A,TANGO2,ACAT1,NFIB,SMARCC1,USP34,ACSL1 |
| E2F3B downregulate Hepatic System Disease                     | 3.80E-02    | NAV2,CCP110,MSH3,GTF3C2,KIF1B,SFPQ,RBM33,RICTOR,LATS2,KPNA1,TOMM70A,USF3,RCL1,TBC1D4,SMPD4,ZNF318,RORA,PRPF4B,GDE1,TFDP2,ALDH7A1,PABPC1,SYNE2,USP38,BIRC6,AGFG2,MON2,ARHGAP5,ARIH1,WHSC1L1,NASP,UGP2,YTHDF3,ACY1,AHCTF1,KIAA0368,ZNF644,BAZ1B,MCCC2,TRIM33,NFIX,PA2G4,XPNPEP3,ATF6,TYW1,XYLB,LYST,STEAP2,ADK,EIF3A,LPP,FBXO21,UBE3C,UBR5,MTRR,HERPUD1,PAICS,MTHFD1,ALS2,RETSAT,MTO1,ZHX3,SIN3A,SF3B2,U2SURP,CHD9,PAN3,NFIB,IREB2,USP34,TCF7L2,ACSL1                                                                                                                                                                                                                                                                                                                                                                   |
| E2F3B downregulate Behavior                                   | 3.99E-02    | RORA,PPP1CB,SFPQ,HNRNP,AHGY,PHLPP1                                                                                                                                                                                                                                                                                                                                                                                                                                                                                                                                                                                                                                                                                                                                                                                    |

## Supplemental Table 14. General IPA functions for E2F1 and E2F3B putative direct targets

| Category                                                      | B-H p-value | Genes                                                                                                                                                                                                                                                                                                                                             |
|---------------------------------------------------------------|-------------|---------------------------------------------------------------------------------------------------------------------------------------------------------------------------------------------------------------------------------------------------------------------------------------------------------------------------------------------------|
| E2F3B downregulate RNA Post-Transcriptional Modification      | 4.01E-02    | PABPC1,RCL1,SF3B2,PRPF19,PRPF4B,TARDBP,CNOT6L,SYNCRIP,SFPQ,HNRNPD,RBM39                                                                                                                                                                                                                                                                           |
| E2F3B downregulate Molecular Transport                        | 4.70E-02    | PEBP1,ABCD3,KIF1B,RAB2A,TNPO1,SLC35A3,PPP1CB,ATF6,TAF10,GPAT4,KPNA1,SLC15A4,TOMM70A,XIAP,UGP2,KIF13A,STEAP2,ADK,TTC7A,ACAT1,SLC25A32,PDK1,IRESB2,ACSL1                                                                                                                                                                                            |
| E2F3B downregulate Amino Acid Metabolism                      | 4.72E-02    | AFMID,MTRR,SLC25A32,MTHFD1,SLC15A4,MCCC2,AHCY                                                                                                                                                                                                                                                                                                     |
| E2F3B downregulate Post-Translational Modification            | 5.67E-02    | UBR5,TRIM33,PRPF19,UBE4B,BIRC6,HERPUD1,PPP1CB,XIAP,PDP2,ARIH1,CAND1,LYST,NUP153,MTMR4,PPP2R3A,AHCTF1,PHLPP1,UBE3C                                                                                                                                                                                                                                 |
| E2F3B downregulate Protein Synthesis                          | 5.67E-02    | UBR5,STX12,PABPC1,UBE4B,SYNCRIP,HERPUD1,HNRNPD,ATF6,KPNA1,EIF4G1,XIAP,ARIH1,CDKN2AIP,NUP153,PPP2R3A,ACY1,AGBL3,EIF3A,AHCTF1,KIAA0368,NAA16,IRESB2,PHLPP1                                                                                                                                                                                          |
| E2F3B downregulate Cell Signaling                             | 5.67E-02    | UBR5,NUP153,AHCTF1                                                                                                                                                                                                                                                                                                                                |
| E2F3B downregulate Connective Tissue Development and Function | 6.60E-02    | ARHGAP5,NFIX,TBC1D4,GTF2I,ADK,GPAT4,LATS2,ADRB3                                                                                                                                                                                                                                                                                                   |
| E2F3B downregulate Gene Expression                            | 6.60E-02    | PEBP1,NFIX,PA2G4,GTF3C2,GTF2I,TLE2,SFPQ,ATF6,TAF10,TRIP4,EIF4G1,HSPA4,ZC3H8,RORA,TARDBP,ZNF24,SOS1,EIF3A,NEO1,TFDP2,HIPK1,UBR5,SYNCRIP,HNRNPD,XIAP,ZHX3,SIN3A,ELF1,CAND1,WHSC1L1,AHCTF1,NFIB,SMARCC1,IRESB2,RBM39,TCF7L2,TAF15                                                                                                                    |
| E2F3B downregulate Cell Morphology                            | 7.19E-02    | PEBP1,TRIM33,PRPF19,SYNE2,NFIX,UBE4B,SYNCRIP,GPHN,TAOK1,TAF10,LATS2,RICTOR,GPAT4,ALS2,RIF1,TBC1D4,ADGRF5,RORA,TARDBP,NEO1,NFIB,PDK1,TCF7L2,PHLPP1                                                                                                                                                                                                 |
| E2F3B downregulate Cellular Assembly and Organization         | 8.64E-02    | NFIX,SMARCC2,ATF6,GPHN,RICTOR,HSPA4,TBC1D4,NUP153,TARDBP,EIF3A,AMIGO1,ACAT1,NEO1,BAZ1B,SMARCC1                                                                                                                                                                                                                                                    |
| E2F3B downregulate Cellular Development                       | 9.09E-02    | UBR5,PRPF19,MSH3,BIRC6,SFPQ,GPHN,GPAT4,RICTOR,XIAP,NUP153,RORA,KIF13A,PRPF4B,TARDBP,ZNF24,EIF3A,NFIB,SMARCC1,PDK1,PHLPP1                                                                                                                                                                                                                          |
| E2F3B downregulate Cellular Growth and Proliferation          | 9.09E-02    | PRPF19,MSH3,SFPQ,LATS2,RICTOR,HSPA4,RCL1,IPMK,KIF13A,RORA,PRPF4B,TARDBP,NEO1,HIPK1,AHCY,WAPL,UBE4B,CNOT6L,BIRC6,ELF1,ARHGAP5,ARIH1,NASP,PHLPP1,PEBP1,TRIM33,NFIX,PA2G4,GTF2I,PPP1CB,ATF6,GPHN,EIF4G1,EPHB6,HNRNPR,STEAP2,ZNF24,SOS1,ADK,EIF3A,MCM10,PDK1,UBR5,MEMO1,HNRNPD,MTHFD1,ALS2,XIAP,SIN3A,CDKN2AIP,NUP153,SF3B2,ACAT1,NFIB,SMARCC1,TCF7L2 |
| E2F3B downregulate Tumor Morphology                           | 9.09E-02    | HSPA4,XIAP                                                                                                                                                                                                                                                                                                                                        |
| E2F3B downregulate Connective Tissue Disorders                | 9.09E-02    | MEMO1,MTRR,NFIX,SLC35A3,STEAP2,SOS1,TFDP2,BAZ1B,MTHFD1,IRESB2                                                                                                                                                                                                                                                                                     |
| E2F3B downregulate Immunological Disease                      | 9.09E-02    | NAV2,NFIX,AKAP8,MSH3,KIF1B,VPS13A,STARD7,GPHN,EIF4G1,RBM33,ADRB3,EPHB6,ZC3H8,IPMK,RIF1,HNRNPR,STEAP2,PDK1,LPP,AHCY,UBE3C,SYNE2,DLEU2,BIRC6,MTHFD1,ALS2,XIAP,ELF1,ARIH1,WHSC1L1,MTMR4,CHD9,AHCTF1,FBXO30,SLC25A32,SMARCC1,USP34                                                                                                                    |
| E2F3B downregulate Cellular Function and Maintenance          | 9.09E-02    | TRIM33,PRPF19,NFIX,AP3M1,UBE4B,KIF1B,GPHN,RICTOR,MTHFD1,ALS2,RIF1,SOS1,TTC7A,PDK1,IRESB2,PHLPP1                                                                                                                                                                                                                                                   |
| E2F3B downregulate Tissue Development                         | 9.09E-02    | NOL7,NFIX,GPHN,GPAT4,RICTOR,TGS1,ADRB3,ARHGAP5,NUP153,RORA,STEAP2,SOS1,ZNF24,NFIB,SMARCC1,PDK1,HIPK1,TCF7L2,RAD23B,PHLPP1                                                                                                                                                                                                                         |
| E2F3B downregulate Digestive System Development and Function  | 9.09E-02    | ADK,NFIB,TCF7L2                                                                                                                                                                                                                                                                                                                                   |



## Supplemental Table 14. General IPA functions for E2F1 and E2F3B putative direct targets

| Category                                                                 | B-H p-value | Genes                                                                                                                                                                                                                                |
|--------------------------------------------------------------------------|-------------|--------------------------------------------------------------------------------------------------------------------------------------------------------------------------------------------------------------------------------------|
| E2F3B downregulate Organ Development                                     | 9.09E-02    | NOL7,NUP153,NFIX,RORA,ADK,NFIB,SMARCC1,RICTOR,RAD23B                                                                                                                                                                                 |
| E2F3B downregulate Skeletal and Muscular System Development and Function | 9.09E-02    | NOL7,NFIX,NEO1                                                                                                                                                                                                                       |
| E2F3B downregulate Cell-To-Cell Signaling and Interaction                | 9.09E-02    | SYNE2,NEO1,GPHN,RICTOR,ALS2,TCF7L2                                                                                                                                                                                                   |
| E2F3B downregulate Inflammatory Response                                 | 9.09E-02    | ARIH1,SYNE2,HNRNPR,STEAP2,ADK,SLC25A32,STARD7,RICTOR,PDK1,AHCY                                                                                                                                                                       |
| E2F3B downregulate Hematological System Development and Function         | 9.09E-02    | RORA,SOS1,SMARCC1,RICTOR,PDK1,XIAP,PHLPP1                                                                                                                                                                                            |
| E2F3B downregulate Hematopoiesis                                         | 9.09E-02    | RORA,SMARCC1,RICTOR,PHLPP1                                                                                                                                                                                                           |
| E2F3B downregulate Cardiovascular System Development and Function        | 9.09E-02    | RORA,PRPF4B,ZNF24,EIF3A,PPP1CB                                                                                                                                                                                                       |
| E2F3B downregulate Skeletal and Muscular Disorders                       | 9.09E-02    | MEMO1,MTRR,NFIX,SYNE2,AKAP8,KIF1B,SLC35A3,EIF4G1,LATS2,MTHFD1,MTO1,ALS2,ADRB3,SOS1,TFDP2,BAZ1B,SMARCC1,B3GALNT2,IRESB2,HIPK1,RAD23B,TCF7L2,ACSL1                                                                                     |
| E2F3B downregulate Cardiovascular Disease                                | 9.09E-02    | CAND1,HSPA4,MTRR,PPP1CB,SLC25A32,IRESB2,TOMM70A,MTO1,ACSL1,ADRB3                                                                                                                                                                     |
| E2F3B downregulate Endocrine System Disorders                            | 9.09E-02    | MEMO1,NFIX,TCF7L2,ADRB3                                                                                                                                                                                                              |
| E2F3B downregulate Neurological Disease                                  | 9.09E-02    | PEBP1,PRPF19,NFIX,MSH3,KIF1B,VPS13A,SFPQ,PPP1CB,GPHN,EIF4G1,TYW1,ADRB3,RORA,PRPF4B,ADK,TARDBP,ZNF24,B3GALNT2,HIPK1,PDK1,AHCY,ALDH7A1,MTRR,UBE4B,SLC35A3,BIRC6,HERPUD1,MTHFD1,ALS2,XIAP,SIN3A,ZBTB44,ACAT1,NFIB,SMARCC1,IRESB2,TCF7L2 |
| E2F3B downregulate Lymphoid Tissue Structure and Development             | 9.09E-02    | RORA,SMARCC1,RICTOR,PHLPP1                                                                                                                                                                                                           |
| E2F3B downregulate Cellular Compromise                                   | 9.09E-02    | UBE4B,SMARCC2,ATF6,GPHN,LATS2,ALS2,ADRB3,XIAP,ARHGAP5,HSPA4,NUP153,TARDBP,SMARCC1,IRESB2,ACSL1                                                                                                                                       |
| E2F3B downregulate Cell-mediated Immune Response                         | 9.09E-02    | RICTOR,PHLPP1                                                                                                                                                                                                                        |
| E2F3B downregulate Humoral Immune Response                               | 9.09E-02    | SOS1,SMARCC1,RICTOR,PDK1                                                                                                                                                                                                             |
| E2F3B downregulate Antimicrobial Response                                | 9.09E-02    | AHCY                                                                                                                                                                                                                                 |
| E2F3B downregulate Vitamin and Mineral Metabolism                        | 9.09E-02    | MTRR,SLC25A32,GPHN,MTHFD1,RETSAT                                                                                                                                                                                                     |
| E2F3B downregulate Drug Metabolism                                       | 9.09E-02    | MTRR,SLC25A32                                                                                                                                                                                                                        |
| E2F3B downregulate Endocrine System Development and Function             | 9.09E-02    | ACAT1,TCF7L2                                                                                                                                                                                                                         |

## Supplemental Table 14. General IPA functions for E2F1 and E2F3B putative direct targets

| Category                                                        | B-H p-value | Genes                                                                                                                                                                                                                                    |
|-----------------------------------------------------------------|-------------|------------------------------------------------------------------------------------------------------------------------------------------------------------------------------------------------------------------------------------------|
| E2F3B downregulate Ophthalmic Disease                           | 9.09E-02    | ZNF644,ATF6,B3GALNT2,ADRB3,RAD23B                                                                                                                                                                                                        |
| E2F3B downregulate Psychological Disorders                      | 9.09E-02    | PRPF19,UBE4B,MSH3,VPS13A,PRPF4B,TARDBP,BIRC6,SFPQ,EIF4G1,ADRB3,AHCY                                                                                                                                                                      |
| E2F3B downregulate Organismal Survival                          | 1.10E-01    | TRIM33,PRPF19,NFIX,MSH3,KIF1B,GTF2I,ATF6,GPHN,TAF10,KPNA1,RICTOR,LATS2,TBC1D4,ADGRF5,RIF1,IPMK,RORA,ADK,OS1,ZNF24,TARDBP,MCM10,HIPK1,RAD23B,AFMID,SYNE2,UBE4B,BIRC6,HNRNPD,TGS1,SIN3A,XIAP,ARHGAP5,NASP,AHCTF1,NFIB,SMARCC1,IREB2,TCF7L2 |
| E2F3B downregulate Cellular Movement                            | 1.21E-01    | PEBP1,CCP110,KIF13A,AHCTF1,BIRC6,LATS2,PKD1,XIAP                                                                                                                                                                                         |
| E2F3B downregulate Hair and Skin Development and Function       | 1.21E-01    | PEBP1,RORA,NFIB                                                                                                                                                                                                                          |
| E2F3B downregulate Reproductive System Development and Function | 1.21E-01    | NUP153,NFIX,KIF1B,KPNA1                                                                                                                                                                                                                  |
| E2F3B downregulate Respiratory System Development and Function  | 1.21E-01    | UBR5,NOL7,GTF2I                                                                                                                                                                                                                          |
| E2F3B downregulate RNA Damage and Repair                        | 1.21E-01    | GSPT1,CNOT6L,HNRNPD                                                                                                                                                                                                                      |
| E2F3B downregulate Visual System Development and Function       | 1.21E-01    | WAPL,RAD23B                                                                                                                                                                                                                              |
| E2F3B downregulate Nutritional Disease                          | 1.21E-01    | ADRB3                                                                                                                                                                                                                                    |
| E2F3B downregulate Protein Degradation                          | 1.22E-01    | UBR5,ARIH1,STX12,CDKN2AIP,UBE4B,PPP2R3A,ACY1,AGBL3,KIAA0368,HERPUD1,ATF6,NAA16                                                                                                                                                           |
| E2F3B downregulate Respiratory Disease                          | 1.40E-01    | ADRB3                                                                                                                                                                                                                                    |
| E2F3B downregulate Inflammatory Disease                         | 1.40E-01    | ARIH1,SYNE2,HNRNPR,ADK,SLC25A32,STARD7,ADRB3,AHCY                                                                                                                                                                                        |
| E2F3B downregulate Protein Trafficking                          | 1.54E-01    | AP3M1,KIF1B,RAB2A,KIF13A,TNPO1,STEAP2,PAN3,GPHN,KPNA1,TOMM70A                                                                                                                                                                            |
| E2F3B downregulate Dermatological Diseases and Conditions       | 1.62E-01    | ARIH1,EPHB6,SYNE2,HNRNPR,TTC7A,SLC25A32,STARD7,AHCY                                                                                                                                                                                      |
| E2F3B downregulate RNA Trafficking                              | 1.62E-01    | EIF3A                                                                                                                                                                                                                                    |
| E2F3B downregulate Infectious Diseases                          | 1.62E-01    | AP3M1,ADK                                                                                                                                                                                                                                |
| E2F3B downregulate Hepatic System Development and Function      | 1.79E-01    | ADK                                                                                                                                                                                                                                      |
| E2F3B downregulate Energy Production                            | 1.79E-01    | ABCD3                                                                                                                                                                                                                                    |

## Supplemental Table 15. Liver IPA functions for E2F1 and E2F3B putative direct targets

|                   | Category                                | B-H p-value | Genes                                                                                                                                                                       |
|-------------------|-----------------------------------------|-------------|-----------------------------------------------------------------------------------------------------------------------------------------------------------------------------|
| E2F1 upregulated  | Liver Proliferation                     | 9.48E-05    | MYC,SLC20A1,CCNE1,CDKN1A,JUND,NFE2L2,LGALS1                                                                                                                                 |
| E2F1 upregulated  | Liver Necrosis/Cell Death               | 6.34E-03    | MYC,SLC20A1,CDKN1A,JUND,NFE2L2                                                                                                                                              |
| E2F1 upregulated  | Liver Regeneration                      | 1.36E-02    | CCNE1,BIRC5,NFE2L2                                                                                                                                                          |
| E2F1 upregulated  | Liver<br>Hyperplasia/Hyperproliferation | 1.44E-02    | GJA1,MYEF2,RRBP1,UNC5B,MDM2,AURKA,ATXN2L,GAS2L3,BIRC5,HIVEP2,MYC,TRIB1,CCNA2,CCNE1,NOP58,CDKN1A,TOP2A,CKS1B,ALCAM,IFRD1,NFE2L2                                              |
| E2F1 upregulated  | Biliary Hyperplasia                     | 2.20E-02    | MYC                                                                                                                                                                         |
| E2F1 upregulated  | Hepatocellular<br>Carcinoma             | 2.20E-02    | GJA1,MYEF2,RRBP1,UNC5B,MDM2,AURKA,ATXN2L,GAS2L3,HIVEP2,MYC,TRIB1,CCNA2,NOP58,CDKN1A,TOP2A,CKS1B,ALCAM,IFRD1,NFE2L2                                                          |
| E2F1 upregulated  | Liver Hypoplasia                        | 2.55E-02    | SLC20A1,TACC3                                                                                                                                                               |
| E2F1 upregulated  | Liver Cholestasis                       | 2.75E-02    | GJA1,CDKN1A,NFE2L2                                                                                                                                                          |
| E2F1 upregulated  | Liver Damage                            | 6.84E-02    | CDKN1A,JUND,NFE2L2                                                                                                                                                          |
| E2F1 upregulated  | Liver Failure                           | 6.84E-02    | TOP2A                                                                                                                                                                       |
| E2F1 upregulated  | Glutathione Depletion In<br>Liver       | 6.84E-02    | NFE2L2                                                                                                                                                                      |
| E2F1 upregulated  | Liver Fibrosis                          | 9.16E-02    | NFE2L2,LGALS1                                                                                                                                                               |
| E2F1 upregulated  | Liver Cirrhosis                         | 1.77E-01    | TOP2A,NFE2L2                                                                                                                                                                |
| E2F1 upregulated  | Liver Steatosis                         | 6.41E-01    | CDKN1A                                                                                                                                                                      |
| E2F3B upregulated | Liver Proliferation                     | 9.25E-04    | CTGF,TIMP1,CDKN1A,HBEGF,TOB1,JUND,LGALS1                                                                                                                                    |
| E2F3B upregulated | Liver Fibrosis                          | 1.53E-03    | CTGF,TIMP1,FGFR1,HBEGF,LGALS1                                                                                                                                               |
| E2F3B upregulated | Liver Necrosis/Cell Death               | 1.36E-02    | TIMP1,CDKN1A,HBEGF,JUND                                                                                                                                                     |
| E2F3B upregulated | Liver<br>Hyperplasia/Hyperproliferation | 1.36E-02    | SQLE,UNC5B,FNDC3B,SLC35C1,IQGAP1,CDKN3,WDFY3,TIMP1,CYP51A1,SLC35A5,SOX4,COL4A1,HAUS8,RRBP1,TUBB4B,FGFR1,ACTB,AGO2,TOB1,UBE2S,SP4,COL6A3,CDKN1A,LOXL1,PSAP,CYR61,JAG1,SAMD4A |
| E2F3B upregulated | Hepatocellular<br>Carcinoma             | 1.36E-02    | SQLE,UNC5B,FNDC3B,IQGAP1,CDKN3,WDFY3,CYP51A1,SLC35A5,SOX4,COL4A1,HAUS8,RRBP1,TUBB4B,FGFR1,ACTB,AGO2,TOB1,UBE2S,SP4,COL6A3,CDKN1A,LOXL1,PSAP,CYR61,JAG1,SAMD4A               |
| E2F3B upregulated | Liver Cirrhosis                         | 1.52E-02    | CTGF,TIMP1,FGFR1,JAG1                                                                                                                                                       |
| E2F3B upregulated | Liver Adhesion                          | 1.89E-02    | CTGF                                                                                                                                                                        |
| E2F3B upregulated | Liver Dysfunction                       | 2.88E-02    | FDFT1                                                                                                                                                                       |
| E2F3B upregulated | Liver Damage                            | 7.98E-02    | TIMP1,CDKN1A,JUND                                                                                                                                                           |
| E2F3B upregulated | Liver<br>Inflammation/Hepatitis         | 1.71E-01    | TIMP1,CYR61                                                                                                                                                                 |
| E2F3B upregulated | Liver Failure                           | 1.92E-01    | TIMP1                                                                                                                                                                       |
| E2F3B upregulated | Liver Regeneration                      | 2.59E-01    | TOB1                                                                                                                                                                        |

## Supplemental Table 15. Liver IPA functions for E2F1 and E2F3B putative direct targets

|                     | Category                                   | B-H p-value | Genes                                                                                                                                                                                                                                                                                                                                                                                                                                      |
|---------------------|--------------------------------------------|-------------|--------------------------------------------------------------------------------------------------------------------------------------------------------------------------------------------------------------------------------------------------------------------------------------------------------------------------------------------------------------------------------------------------------------------------------------------|
| E2F3B upregulated   | Liver Hepatomegaly                         | 2.65E-01    | FDFT1                                                                                                                                                                                                                                                                                                                                                                                                                                      |
| E2F3B upregulated   | Liver Enlargement                          | 2.65E-01    | FDFT1                                                                                                                                                                                                                                                                                                                                                                                                                                      |
| E2F3B upregulated   | Liver Cholestasis                          | 2.97E-01    | CDKN1A                                                                                                                                                                                                                                                                                                                                                                                                                                     |
| E2F3B upregulated   | Liver Steatosis                            | 3.06E-01    | CDKN1A,HBEGF                                                                                                                                                                                                                                                                                                                                                                                                                               |
| E2F1 downregulated  | Liver Steatosis                            | 2.67E-01    | PANK1                                                                                                                                                                                                                                                                                                                                                                                                                                      |
| E2F1 downregulated  | Liver<br>Hyperplasia/Hyperproliferation    | 1.00E+00    | RPRD2,ALS2,SLC29A1,PITPNB                                                                                                                                                                                                                                                                                                                                                                                                                  |
| E2F1 downregulated  | Hepatocellular<br>Carcinoma                | 1.00E+00    | RPRD2,ALS2,SLC29A1,PITPNB                                                                                                                                                                                                                                                                                                                                                                                                                  |
| E2F3B downregulated | Liver<br>Hyperplasia/Hyperproliferation    | 2.51E-02    | NAV2,CCP110,MSH3,GTF3C2,KIF1B,SFPQ,RBM33,RICTOR,LATS2, KPNA1,TOMM70A,USF3,RCL1,TBC1D4,SMPD4,ZNF318,RORA,PRPF4B,GDE1,TFDP2,ALDH7A1,SYNE2,USP38,BIRC6,AGFG2,MON2,ARHGAP5,ARIH1,WHSC1L1,NASP,UGP2,YTHDF3,ACY1,AHCTF1,KIAA0368,ZNF644,BAZ1B,MCCC2,TRIM33,NFIX,PA2G4,XPNPEP3,ATF6,TYW1,XYLB,LYST,STEAP2,EIF3A,LPP,FBXO21,UBE3C,UBR5,MTRR,PAICS,HERPUD1,MTHFD1,ALS2,RETSAT,MTO1,ZHX3,SIN3A,SF3B2,U2SURP,CHD9,PAN3,NFIB,IRESB2,USP34,TCF7L2,ACSL1 |
| E2F3B downregulated | Hepatocellular<br>Carcinoma                | 2.51E-02    | NAV2,CCP110,MSH3,GTF3C2,KIF1B,SFPQ,RBM33,RICTOR,LATS2, KPNA1,TOMM70A,USF3,RCL1,TBC1D4,SMPD4,ZNF318,RORA,PRPF4B,GDE1,TFDP2,ALDH7A1,SYNE2,USP38,BIRC6,AGFG2,MON2,ARHGAP5,ARIH1,WHSC1L1,NASP,UGP2,YTHDF3,ACY1,AHCTF1,KIAA0368,ZNF644,BAZ1B,MCCC2,TRIM33,NFIX,PA2G4,XPNPEP3,ATF6,TYW1,XYLB,LYST,STEAP2,EIF3A,LPP,FBXO21,UBE3C,UBR5,MTRR,PAICS,HERPUD1,MTHFD1,ALS2,RETSAT,MTO1,ZHX3,SIN3A,SF3B2,U2SURP,CHD9,PAN3,NFIB,IRESB2,USP34,TCF7L2,ACSL1 |
| E2F3B downregulated | Liver Steatosis                            | 1.91E-01    | RORA,STEAP2,ADK,ATF6                                                                                                                                                                                                                                                                                                                                                                                                                       |
| E2F3B downregulated | Liver Dysfunction                          | 1.91E-01    | ATF6                                                                                                                                                                                                                                                                                                                                                                                                                                       |
| E2F3B downregulated | Liver Damage                               | 2.08E-01    | ADK                                                                                                                                                                                                                                                                                                                                                                                                                                        |
| E2F3B downregulated | Liver<br>Inflammation/Hepatitis            | 2.08E-01    | ADK                                                                                                                                                                                                                                                                                                                                                                                                                                        |
| E2F3B downregulated | Liver Cholestasis                          | 3.12E-01    | UGP2,ACSL1                                                                                                                                                                                                                                                                                                                                                                                                                                 |
| E2F3B downregulated | Hepatocellular<br>Peroxisome Proliferation | 3.12E-01    | ABCD3                                                                                                                                                                                                                                                                                                                                                                                                                                      |
| E2F3B downregulated | Liver Failure                              | 3.43E-01    | ADRB3                                                                                                                                                                                                                                                                                                                                                                                                                                      |
| E2F3B downregulated | Liver Proliferation                        | 3.79E-01    | BIRC6                                                                                                                                                                                                                                                                                                                                                                                                                                      |
| E2F3B downregulated | Liver Fibrosis                             | 5.30E-01    | RORA,ADK                                                                                                                                                                                                                                                                                                                                                                                                                                   |
| E2F3B downregulated | Liver Necrosis/Cell Death                  | 6.31E-01    | TAF10,XIAP                                                                                                                                                                                                                                                                                                                                                                                                                                 |
| E2F3B downregulated | Liver Cirrhosis                            | 6.49E-01    | ADK,ADRB3                                                                                                                                                                                                                                                                                                                                                                                                                                  |

## Supplemental Table 16. E2F1 and E2F3B direct upregulated targets in canonical IPA pathways

| Category                                            |                   | B-H p-value | Genes                                          |
|-----------------------------------------------------|-------------------|-------------|------------------------------------------------|
| Cell Cycle: G2/M DNA Damage Checkpoint Regulation   | E2F1 upregulated  | 7.84E-09    | CDKN1A,CKS1B,TOP2A,MDM2,AURKA,CDK1,CHEK1       |
|                                                     | E2F3B upregulated | 9.73E-02    | CDKN1A,YWHAZ                                   |
| ATM Signaling                                       | E2F1 upregulated  | 2.37E-05    | RAD51,CDKN1A,MDM2,CDK1,CHEK1                   |
|                                                     | E2F3B upregulated | 3.37E-01    | CDKN1A                                         |
| Cell Cycle: G1/S Checkpoint Regulation              | E2F1 upregulated  | 2.98E-05    | MYC,CCNE1,CDKN1A,MDM2,E2F3                     |
|                                                     | E2F3B upregulated | 3.39E-01    | CDKN1A                                         |
| Cyclins and Cell Cycle Regulation                   | E2F1 upregulated  | 6.84E-05    | CCNA2,CCNE1,CDKN1A,E2F3,CDK1                   |
|                                                     | E2F3B upregulated | 4.62E-01    | CDKN1A                                         |
| Superpathway of Cholesterol Biosynthesis            | E2F1 upregulated  | 2.27E-01    | IDI1                                           |
|                                                     | E2F3B upregulated | 1.77E-04    | FDPS,SQLE,FDFT1,CYP51A1                        |
| Hepatic Fibrosis / Hepatic Stellate Cell Activation | E2F3B upregulated | 2.88E-05    | COL4A1,CTGF,MYH9,COL6A3,PDGFA,TIMP1,FGFR1,KLF6 |

**Supplemental Table 17. Expression of E2F1 and E2F3B targets in HCC samples with normal or elevated E2F1 copy numbers**

| Gene     | Regulated by | Mean expression in E2F1 diploid samples | Mean expression in E2F1 copy number increased samples | Wilcox adj. P-value |   |
|----------|--------------|-----------------------------------------|-------------------------------------------------------|---------------------|---|
| E2F1     | NA           | -0.004                                  | 0.390                                                 | 0.000               | * |
| E2F3     | E2F1         | 0.258                                   | 0.289                                                 | 1.000               |   |
| ACSL3    | E2F1         | -0.055                                  | 0.080                                                 | 1.000               |   |
| ALCAM    | E2F1         | 0.047                                   | 0.057                                                 | 1.000               |   |
| ATXN2L   | E2F1         | -0.049                                  | 0.038                                                 | 1.000               |   |
| AURKA    | E2F1         | 0.066                                   | 0.716                                                 | 0.000               | * |
| BIRC5    | E2F1         | 0.082                                   | 0.606                                                 | 0.000               | * |
| CAMK2N2  | E2F1         | -0.031                                  | 0.019                                                 | 1.000               |   |
| CCNA2    | E2F1         | -0.070                                  | 0.281                                                 | 0.000               | * |
| CCNE1    | E2F1         | 0.288                                   | 0.221                                                 | 0.052               |   |
| CDC6     | E2F1         | 0.067                                   | 0.396                                                 | 0.005               | * |
| CDCA5    | E2F1         | -0.082                                  | 0.522                                                 | 0.000               | * |
| CDK1     | E2F1         | -0.040                                  | 0.370                                                 | 0.000               | * |
| CEP55    | E2F1         | 0.084                                   | 0.402                                                 | 0.000               | * |
| CHEK1    | E2F1         | -0.074                                  | 0.331                                                 | 0.009               | * |
| CKAP2    | E2F1         | -0.162                                  | 0.055                                                 | 0.601               |   |
| DDX50    | E2F1         | -0.131                                  | 0.239                                                 | 1.000               |   |
| DEPDC1B  | E2F1         | -0.039                                  | 0.258                                                 | 0.000               | * |
| DUSP6    | E2F1         | 0.066                                   | -0.228                                                | 1.000               |   |
| GAS2L3   | E2F1         | -0.031                                  | 0.327                                                 | 1.000               |   |
| GJA1     | E2F1         | -0.066                                  | -0.066                                                | 1.000               |   |
| HELLS    | E2F1         | -0.006                                  | 0.429                                                 | 0.002               | * |
| HEXA     | E2F1         | -0.009                                  | -0.195                                                | 1.000               |   |
| HIST1H4A | E2F1         | -0.028                                  | 0.160                                                 | 1.000               |   |
| HIVEP2   | E2F1         | -0.146                                  | -0.346                                                | 1.000               |   |
| IDI1     | E2F1         | -0.049                                  | 0.192                                                 | 0.984               |   |
| IFRD1    | E2F1         | 0.255                                   | 0.139                                                 | 1.000               |   |
| MDM2     | E2F1         | 0.105                                   | 0.071                                                 | 1.000               |   |
| MYC      | E2F1         | 0.436                                   | 0.281                                                 | 1.000               |   |
| MYEF2    | E2F1         | 0.113                                   | 0.189                                                 | 1.000               |   |
| NFE2L2   | E2F1         | 0.050                                   | -0.370                                                | 1.000               |   |
| NOP58    | E2F1         | 0.087                                   | 0.279                                                 | 1.000               |   |
| PAPSS1   | E2F1         | -0.035                                  | 0.210                                                 | 1.000               |   |
| PBK      | E2F1         | -0.212                                  | 0.059                                                 | 0.021               | * |
| PBX3     | E2F1         | -0.035                                  | -0.055                                                | 1.000               |   |
| PIGP     | E2F1         | -0.179                                  | -0.383                                                | 1.000               |   |
| PLEKHA1  | E2F1         | -0.105                                  | -0.044                                                | 1.000               |   |
| PVR      | E2F1         | 0.001                                   | 0.286                                                 | 0.045               | * |
| RAD18    | E2F1         | 0.082                                   | 0.179                                                 | 1.000               |   |
| RAD51    | E2F1         | -0.023                                  | 0.586                                                 | 0.000               | * |
| RHOB     | E2F1         | 0.026                                   | -0.234                                                | 1.000               |   |
| SHCBP1   | E2F1         | 0.001                                   | 0.237                                                 | 0.008               | * |
| SLC20A1  | E2F1         | -0.033                                  | 0.170                                                 | 0.601               |   |
| SMC4     | E2F1         | 0.006                                   | 0.169                                                 | 1.000               |   |
| SPATS2   | E2F1         | 0.053                                   | 0.264                                                 | 0.401               |   |
| STMN1    | E2F1         | -0.145                                  | 0.317                                                 | 0.000               | * |
| TACC3    | E2F1         | -0.016                                  | 0.387                                                 | 0.000               | * |
| TOP2A    | E2F1         | -0.022                                  | 0.437                                                 | 0.000               | * |

**Supplemental Table 17. Expression of E2F1 and E2F3B targets in HCC samples with normal or elevated E2F1 copy numbers**

| Gene     | Regulated by | Mean expression in E2F1 diploid samples | Mean expression in E2F1 copy number increased samples | Wilcox adj. P-value |
|----------|--------------|-----------------------------------------|-------------------------------------------------------|---------------------|
| TRIB1    | E2F1         | 0.103                                   | 0.068                                                 | 1.000               |
| UHRF1    | E2F1         | -0.050                                  | 0.242                                                 | 0.004 *             |
| WWTR1    | E2F1         | 0.036                                   | -0.073                                                | 1.000               |
| BTG2     | E2F1;E2F3B   | -0.034                                  | 0.070                                                 | 0.385               |
| CDKN1A   | E2F1;E2F3B   | 0.021                                   | -0.028                                                | 1.000               |
| EGR2     | E2F1;E2F3B   | -0.022                                  | -0.099                                                | 1.000               |
| EXOC4    | E2F1;E2F3B   | 0.228                                   | 0.247                                                 | 1.000               |
| JUND     | E2F1;E2F3B   | -0.118                                  | 0.135                                                 | 1.000               |
| LGALS1   | E2F1;E2F3B   | 0.069                                   | 0.180                                                 | 1.000               |
| PHLDA3   | E2F1;E2F3B   | -0.005                                  | 0.202                                                 | 1.000               |
| RRBP1    | E2F1;E2F3B   | -0.045                                  | 0.342                                                 | 0.027 *             |
| TMEM43   | E2F1;E2F3B   | 0.088                                   | 0.231                                                 | 1.000               |
| TUBB6    | E2F1;E2F3B   | -0.011                                  | 0.070                                                 | 1.000               |
| UNC5B    | E2F1;E2F3B   | -0.006                                  | 0.138                                                 | 1.000               |
| ABRACL   | E2F3B        | -0.149                                  | -0.230                                                | 1.000               |
| ACTB     | E2F3B        | 0.096                                   | 0.434                                                 | 1.000               |
| ADPRH    | E2F3B        | 0.031                                   | -0.061                                                | 1.000               |
| AGO2     | E2F3B        | 0.861                                   | 1.216                                                 | 1.000               |
| ARSG     | E2F3B        | 0.085                                   | 0.125                                                 | 1.000               |
| ATP2B1   | E2F3B        | 0.003                                   | 0.363                                                 | 0.514               |
| CAPG     | E2F3B        | -0.046                                  | 0.172                                                 | 0.128               |
| CDKN3    | E2F3B        | -0.032                                  | 0.408                                                 | 0.000 *             |
| CENPM    | E2F3B        | -0.081                                  | 0.654                                                 | 0.000 *             |
| COL4A1   | E2F3B        | 0.046                                   | -0.039                                                | 1.000               |
| COL6A3   | E2F3B        | 0.008                                   | 0.052                                                 | 1.000               |
| CSRP1    | E2F3B        | 0.051                                   | 0.026                                                 | 1.000               |
| CTGF     | E2F3B        | -0.137                                  | -0.012                                                | 1.000               |
| CYP51A1  | E2F3B        | 0.152                                   | 0.474                                                 | 0.799               |
| CYR61    | E2F3B        | -0.037                                  | -0.198                                                | 1.000               |
| DDR1     | E2F3B        | 0.039                                   | 0.083                                                 | 1.000               |
| DLGAP5   | E2F3B        | 0.014                                   | 0.504                                                 | 0.000 *             |
| EIF4EBP2 | E2F3B        | -0.141                                  | 0.017                                                 | 1.000               |
| FAAP20   | E2F3B        | -0.083                                  | -0.048                                                | 1.000               |
| FDFT1    | E2F3B        | -0.380                                  | -0.268                                                | 1.000               |
| FDPS     | E2F3B        | 0.557                                   | 0.983                                                 | 0.146               |
| FGFR1    | E2F3B        | -0.082                                  | -0.155                                                | 1.000               |
| FNDC3B   | E2F3B        | 0.059                                   | 0.163                                                 | 1.000               |
| GNAI2    | E2F3B        | -0.059                                  | 0.025                                                 | 1.000               |
| HAUS8    | E2F3B        | -0.080                                  | 0.371                                                 | 0.002 *             |
| HBEGF    | E2F3B        | -0.030                                  | -0.087                                                | 1.000               |
| IQGAP1   | E2F3B        | 0.091                                   | 0.113                                                 | 1.000               |
| JAG1     | E2F3B        | 0.028                                   | 0.273                                                 | 1.000               |
| KLF6     | E2F3B        | 0.007                                   | 0.007                                                 | 1.000               |
| LASP1    | E2F3B        | 0.080                                   | 0.307                                                 | 1.000               |
| LIPT2    | E2F3B        | 0.034                                   | 0.137                                                 | 1.000               |
| LOXL1    | E2F3B        | 0.165                                   | 0.216                                                 | 1.000               |
| LYSMD2   | E2F3B        | -0.037                                  | -0.311                                                | 1.000               |

**Supplemental Table 17. Expression of E2F1 and E2F3B targets in HCC samples with normal or elevated E2F1 copy numbers**

| Gene     | Regulated by | Mean expression in E2F1 diploid samples | Mean expression in E2F1 copy number increased samples | Wilcox adj. P-value |
|----------|--------------|-----------------------------------------|-------------------------------------------------------|---------------------|
| MYH9     | E2F3B        | 0.002                                   | 0.031                                                 | 1.000               |
| NRM      | E2F3B        | 0.164                                   | 0.706                                                 | 0.001 *             |
| PDAP1    | E2F3B        | 0.337                                   | 0.667                                                 | 0.961               |
| PDGFA    | E2F3B        | 0.115                                   | 0.303                                                 | 1.000               |
| PDLIM1   | E2F3B        | -0.157                                  | -0.024                                                | 1.000               |
| PLAT     | E2F3B        | -0.029                                  | -0.178                                                | 1.000               |
| PRDX2    | E2F3B        | -0.023                                  | 0.174                                                 | 1.000               |
| PSAP     | E2F3B        | -0.083                                  | -0.016                                                | 1.000               |
| PVT1     | E2F3B        | 0.986                                   | 0.758                                                 | 1.000               |
| RAB5C    | E2F3B        | 0.284                                   | 0.085                                                 | 1.000               |
| SAE1     | E2F3B        | 0.099                                   | 0.645                                                 | 0.110               |
| SAMD4A   | E2F3B        | -0.171                                  | -0.405                                                | 1.000               |
| SECISBP2 | E2F3B        | -0.181                                  | -0.303                                                | 1.000               |
| SEPT12   | E2F3B        | -0.152                                  | -0.153                                                | 1.000               |
| SF1      | E2F3B        | 0.007                                   | 0.037                                                 | 1.000               |
| SLC35A5  | E2F3B        | 0.101                                   | -0.265                                                | 1.000               |
| SLC35C1  | E2F3B        | 0.021                                   | -0.147                                                | 1.000               |
| SOX4     | E2F3B        | 0.053                                   | 0.238                                                 | 1.000               |
| SP4      | E2F3B        | 0.006                                   | 0.073                                                 | 1.000               |
| SQLE     | E2F3B        | 0.496                                   | 1.029                                                 | 0.049 *             |
| SRXN1    | E2F3B        | 0.016                                   | 0.064                                                 | 1.000               |
| TIMP1    | E2F3B        | -0.023                                  | -0.136                                                | 1.000               |
| TOB1     | E2F3B        | 0.264                                   | -0.040                                                | 1.000               |
| TUBB4B   | E2F3B        | -0.120                                  | 0.335                                                 | 0.176               |
| UAP1L1   | E2F3B        | 0.096                                   | 0.150                                                 | 1.000               |
| UBE2S    | E2F3B        | -0.037                                  | 0.395                                                 | 0.000 *             |
| VAMP3    | E2F3B        | -0.360                                  | -0.504                                                | 1.000               |
| WDFY3    | E2F3B        | -0.205                                  | -0.405                                                | 1.000               |
| YWHAZ    | E2F3B        | 0.912                                   | 1.254                                                 | 1.000               |
| ZC3HAV1  | E2F3B        | 0.133                                   | -0.233                                                | 1.000               |
| ZDHHC14  | E2F3B        | -0.275                                  | -0.071                                                | 0.924               |



**Supplemental Table 18. Expression of E2F1 and E2F3B targets in HCC samples with normal or elevated E2F3 copy numbers**

| Gene     | Regulated by | Mean expression in E2F3 diploid samples | Mean expression in E2F3 copy number increased samples | Wilcox adj. <i>P</i> -value |
|----------|--------------|-----------------------------------------|-------------------------------------------------------|-----------------------------|
| E2F1     | NA           | 0.042                                   | 0.228                                                 | 1.000                       |
| E2F3     | E2F1         | -0.004                                  | 0.643                                                 | 0.001 *                     |
| ATXN2L   | E2F1         | -0.056                                  | 0.027                                                 | 1.000                       |
| AURKA    | E2F1         | 0.285                                   | 0.252                                                 | 1.000                       |
| BIRC5    | E2F1         | 0.240                                   | 0.260                                                 | 1.000                       |
| CAMK2N2  | E2F1         | -0.018                                  | -0.011                                                | 1.000                       |
| CCNA2    | E2F1         | 0.038                                   | 0.045                                                 | 1.000                       |
| CCNE1    | E2F1         | 0.266                                   | 0.268                                                 | 1.000                       |
| CDC6     | E2F1         | 0.083                                   | 0.292                                                 | 1.000                       |
| CDCA5    | E2F1         | 0.042                                   | 0.200                                                 | 1.000                       |
| CDK1     | E2F1         | 0.038                                   | 0.161                                                 | 1.000                       |
| CEP55    | E2F1         | 0.218                                   | 0.139                                                 | 1.000                       |
| CHEK1    | E2F1         | -0.072                                  | 0.228                                                 | 0.180                       |
| CKAP2    | E2F1         | -0.082                                  | -0.109                                                | 1.000                       |
| DDX50    | E2F1         | -0.094                                  | 0.097                                                 | 1.000                       |
| DEPDC1B  | E2F1         | 0.049                                   | 0.063                                                 | 1.000                       |
| DUSP6    | E2F1         | 0.069                                   | -0.159                                                | 1.000                       |
| GAS2L3   | E2F1         | 0.091                                   | 0.069                                                 | 1.000                       |
| GJA1     | E2F1         | -0.004                                  | -0.152                                                | 1.000                       |
| HELLS    | E2F1         | 0.051                                   | 0.242                                                 | 1.000                       |
| HEXA     | E2F1         | -0.053                                  | -0.088                                                | 1.000                       |
| HIST1H4A | E2F1         | 0.042                                   | 0.016                                                 | 1.000                       |
| HIVEP2   | E2F1         | -0.096                                  | -0.366                                                | 1.000                       |
| IDI1     | E2F1         | -0.077                                  | 0.172                                                 | 0.937                       |
| IFRD1    | E2F1         | 0.248                                   | 0.177                                                 | 1.000                       |
| MDM2     | E2F1         | 0.185                                   | -0.030                                                | 1.000                       |
| MYC      | E2F1         | 0.463                                   | 0.282                                                 | 1.000                       |
| MYEF2    | E2F1         | 0.178                                   | 0.080                                                 | 1.000                       |
| NFE2L2   | E2F1         | -0.066                                  | -0.106                                                | 1.000                       |
| NOP58    | E2F1         | 0.032                                   | 0.306                                                 | 1.000                       |
| PAPSS1   | E2F1         | 0.088                                   | -0.020                                                | 1.000                       |
| PBK      | E2F1         | -0.138                                  | -0.111                                                | 1.000                       |
| PBX3     | E2F1         | -0.006                                  | -0.090                                                | 1.000                       |
| PIGP     | E2F1         | -0.277                                  | -0.198                                                | 1.000                       |
| PLEKHA1  | E2F1         | -0.119                                  | -0.039                                                | 1.000                       |
| PVR      | E2F1         | 0.179                                   | -0.030                                                | 1.000                       |
| RAD18    | E2F1         | 0.101                                   | 0.128                                                 | 1.000                       |
| RAD51    | E2F1         | 0.121                                   | 0.235                                                 | 1.000                       |
| RHOB     | E2F1         | 0.009                                   | -0.146                                                | 1.000                       |
| SHCBP1   | E2F1         | 0.118                                   | 0.018                                                 | 1.000                       |
| SLC20A1  | E2F1         | 0.090                                   | -0.050                                                | 1.000                       |
| SMC4     | E2F1         | 0.056                                   | 0.059                                                 | 1.000                       |
| SPATS2   | E2F1         | 0.109                                   | 0.135                                                 | 1.000                       |
| STMN1    | E2F1         | -0.128                                  | 0.180                                                 | 0.016 *                     |
| TACC3    | E2F1         | 0.124                                   | 0.095                                                 | 1.000                       |
| TOP2A    | E2F1         | 0.062                                   | 0.207                                                 | 1.000                       |
| TRIB1    | E2F1         | 0.176                                   | -0.025                                                | 1.000                       |

**Supplemental Table 18. Expression of E2F1 and E2F3B targets in HCC samples with normal or elevated E2F3 copy numbers**

| Gene     | Regulated by | Mean expression in E2F3 diploid samples | Mean expression in E2F3 copy number increased samples | Wilcox adj. <i>P</i> -value |
|----------|--------------|-----------------------------------------|-------------------------------------------------------|-----------------------------|
| UHRF1    | E2F1         | -0.019                                  | 0.126                                                 | 1.000                       |
| WWTR1    | E2F1         | 0.039                                   | -0.049                                                | 1.000                       |
| BTG2     | E2F1;E2F3B   | 0.013                                   | -0.022                                                | 1.000                       |
| CDKN1A   | E2F1;E2F3B   | 0.032                                   | -0.031                                                | 1.000                       |
| EGR2     | E2F1;E2F3B   | 0.068                                   | -0.204                                                | 1.000                       |
| EXOC4    | E2F1;E2F3B   | 0.150                                   | 0.350                                                 | 1.000                       |
| JUND     | E2F1;E2F3B   | -0.040                                  | -0.034                                                | 1.000                       |
| LGALS1   | E2F1;E2F3B   | 0.209                                   | -0.040                                                | 1.000                       |
| PHLDA3   | E2F1;E2F3B   | 0.128                                   | -0.032                                                | 1.000                       |
| RRBP1    | E2F1;E2F3B   | 0.050                                   | 0.115                                                 | 1.000                       |
| TMEM43   | E2F1;E2F3B   | 0.233                                   | -0.004                                                | 1.000                       |
| TUBB6    | E2F1;E2F3B   | 0.144                                   | -0.164                                                | 1.000                       |
| UNC5B    | E2F1;E2F3B   | 0.035                                   | 0.047                                                 | 1.000                       |
| ABRACL   | E2F3B        | -0.008                                  | -0.404                                                | 1.000                       |
| ACTB     | E2F3B        | 0.357                                   | -0.010                                                | 1.000                       |
| ADPRH    | E2F3B        | 0.122                                   | -0.164                                                | 1.000                       |
| AGO2     | E2F3B        | 0.764                                   | 1.263                                                 | 1.000                       |
| ARSG     | E2F3B        | 0.106                                   | 0.086                                                 | 1.000                       |
| ATP2B1   | E2F3B        | 0.067                                   | 0.186                                                 | 1.000                       |
| CAPG     | E2F3B        | 0.022                                   | 0.025                                                 | 1.000                       |
| CDKN3    | E2F3B        | 0.041                                   | 0.199                                                 | 1.000                       |
| CENPM    | E2F3B        | 0.063                                   | 0.274                                                 | 1.000                       |
| COL4A1   | E2F3B        | 0.089                                   | -0.077                                                | 1.000                       |
| COL6A3   | E2F3B        | 0.119                                   | -0.112                                                | 1.000                       |
| CSRP1    | E2F3B        | 0.173                                   | -0.137                                                | 1.000                       |
| CTGF     | E2F3B        | -0.081                                  | -0.121                                                | 1.000                       |
| CYP51A1  | E2F3B        | 0.197                                   | 0.332                                                 | 1.000                       |
| CYR61    | E2F3B        | 0.016                                   | -0.231                                                | 1.000                       |
| DDR1     | E2F3B        | 0.001                                   | 0.125                                                 | 0.961                       |
| DLGAP5   | E2F3B        | 0.107                                   | 0.255                                                 | 1.000                       |
| EIF4EBP2 | E2F3B        | -0.229                                  | 0.100                                                 | 0.474                       |
| FAAP20   | E2F3B        | -0.016                                  | -0.149                                                | 1.000                       |
| FDFT1    | E2F3B        | -0.319                                  | -0.380                                                | 1.000                       |
| FDPS     | E2F3B        | 0.662                                   | 0.733                                                 | 1.000                       |
| FGFR1    | E2F3B        | -0.028                                  | -0.212                                                | 1.000                       |
| FNDC3B   | E2F3B        | 0.113                                   | 0.064                                                 | 1.000                       |
| GNAI2    | E2F3B        | 0.090                                   | -0.202                                                | 1.000                       |
| HAUS8    | E2F3B        | 0.054                                   | 0.075                                                 | 1.000                       |
| HBEGF    | E2F3B        | 0.027                                   | -0.152                                                | 1.000                       |
| IQGAP1   | E2F3B        | 0.223                                   | -0.074                                                | 1.000                       |
| JAG1     | E2F3B        | 0.119                                   | 0.087                                                 | 1.000                       |
| KLF6     | E2F3B        | 0.049                                   | -0.051                                                | 1.000                       |
| LASP1    | E2F3B        | 0.080                                   | 0.250                                                 | 1.000                       |
| LIPT2    | E2F3B        | 0.055                                   | 0.082                                                 | 1.000                       |
| LOXL1    | E2F3B        | 0.397                                   | -0.118                                                | 1.000                       |
| LYSMD2   | E2F3B        | -0.024                                  | -0.260                                                | 1.000                       |
| MYH9     | E2F3B        | 0.041                                   | -0.030                                                | 1.000                       |

**Supplemental Table 18. Expression of E2F1 and E2F3B targets in HCC samples with normal or elevated E2F3 copy numbers**

| Gene     | Regulated by | Mean expression in E2F3 diploid samples | Mean expression in E2F3 copy number increased samples | Wilcox adj. <i>P</i> -value |
|----------|--------------|-----------------------------------------|-------------------------------------------------------|-----------------------------|
| NRM      | E2F3B        | 0.051                                   | 0.728                                                 | 0.002 *                     |
| PDAP1    | E2F3B        | 0.422                                   | 0.469                                                 | 1.000                       |
| PDGFA    | E2F3B        | 0.138                                   | 0.225                                                 | 1.000                       |
| PDLIM1   | E2F3B        | -0.206                                  | 0.011                                                 | 1.000                       |
| PLAT     | E2F3B        | -0.034                                  | -0.135                                                | 1.000                       |
| PRDX2    | E2F3B        | 0.033                                   | 0.048                                                 | 1.000                       |
| PSAP     | E2F3B        | -0.005                                  | -0.140                                                | 1.000                       |
| PVT1     | E2F3B        | 0.939                                   | 0.880                                                 | 1.000                       |
| RAB5C    | E2F3B        | 0.208                                   | 0.240                                                 | 1.000                       |
| SAE1     | E2F3B        | 0.143                                   | 0.450                                                 | 1.000                       |
| SAMD4A   | E2F3B        | -0.199                                  | -0.308                                                | 1.000                       |
| SECISBP2 | E2F3B        | -0.312                                  | -0.092                                                | 1.000                       |
| SEPT12   | E2F3B        | -0.055                                  | -0.287                                                | 1.000                       |
| SF1      | E2F3B        | -0.028                                  | 0.078                                                 | 1.000                       |
| SLC35A5  | E2F3B        | 0.055                                   | -0.110                                                | 1.000                       |
| SLC35C1  | E2F3B        | 0.019                                   | -0.103                                                | 1.000                       |
| SOX4     | E2F3B        | 0.003                                   | 0.262                                                 | 1.000                       |
| SP4      | E2F3B        | 0.017                                   | 0.041                                                 | 1.000                       |
| SQLE     | E2F3B        | 0.548                                   | 0.824                                                 | 1.000                       |
| SRXN1    | E2F3B        | 0.014                                   | 0.054                                                 | 1.000                       |
| TIMP1    | E2F3B        | 0.025                                   | -0.173                                                | 1.000                       |
| TOB1     | E2F3B        | 0.151                                   | 0.192                                                 | 1.000                       |
| TUBB4B   | E2F3B        | 0.089                                   | -0.066                                                | 1.000                       |
| UAP1L1   | E2F3B        | 0.078                                   | 0.162                                                 | 1.000                       |
| UBE2S    | E2F3B        | 0.088                                   | 0.115                                                 | 1.000                       |
| VAMP3    | E2F3B        | -0.335                                  | -0.504                                                | 1.000                       |
| WDFY3    | E2F3B        | -0.137                                  | -0.449                                                | 1.000                       |
| YWHAZ    | E2F3B        | 0.995                                   | 1.053                                                 | 1.000                       |
| ZC3HAV1  | E2F3B        | 0.079                                   | -0.067                                                | 1.000                       |
| ZDHHC14  | E2F3B        | -0.165                                  | -0.275                                                | 1.000                       |

**Supplemental Table 19: Oligonucleotide sequences used for genotyping**

| Allele(s)                                                                                                                   | Primer 1                     | Primer 2                     | Primer 3                   |
|-----------------------------------------------------------------------------------------------------------------------------|------------------------------|------------------------------|----------------------------|
| <i>E2f3a</i> <sup>+</sup> ,<br><i>E2f3a</i> <sup>1Kl</sup> ,<br><i>E2f3a</i> <sup>+</sup> ,<br><i>E2f3a</i> <sup>3bKl</sup> | CATCTCTCGCTCCTGCTC<br>TT     | GACCCTCCTCTCTCCAGAC<br>C     |                            |
| <i>Cre</i>                                                                                                                  | CCTGTTTTGCACGTTAC<br>CG      | ATGCTTCTGTCCGTTTGCC<br>G     |                            |
| <i>E2f1</i> <sup>+</sup> ,<br><i>E2f1</i> <sup>-</sup>                                                                      | AGCCACTGGATATGATTC<br>TTGGAC | AGAAGTCACGCTATGAAAC<br>CTCAC | AGTGCCAGCGGGGCTGCT<br>AAAG |
| <i>E2f3a</i> <sup>+</sup> ,<br><i>E2f3a</i> <sup>-</sup>                                                                    | CTCCAGACCCCGATTAT<br>TT      | TCCAGTGCCTACTCCCTC<br>C      | GCTAGCAGTGCCCTTTTGT<br>C   |
| <i>E2f3b</i> <sup>+</sup> ,<br><i>E2f3b</i> <sup>-</sup>                                                                    | CCCCATTTCCCAAAGTCC<br>TA     | TGTTAGACTCGGGGTGCTT<br>T     | AAAGCGCCTTTGAGAGAT         |

**Supplemental Table 20: Oligonucleotide sequences used for ChIP-qPCR**

| Gene            | Primer 1               | Primer 2                 |
|-----------------|------------------------|--------------------------|
| <i>CDC6</i>     | AAAGGCTCTGTGACTACAGCCA | GATCCTTCTCACGTCTCTCACA   |
| <i>CDKN1A</i>   | CGGAGTGGAAGCAGTTTTG    | GGTAATGGCATAGGGGTTGA     |
| <i>CHEK1</i>    | GCTCAGACGATACTCTCGCCTC | CGCTAACCCAAGACGGGAG      |
| <i>RAD51</i>    | AGCTGGGAACTGCAACTCAT   | CGCCTCACACACTCACCTC      |
| <i>RBM4</i>     | CGGACGCCAATTACCTAAGA   | GCGCCATGAAGCTAAAGACT     |
| <i>TIMELESS</i> | GAGTGAGTGTGTGGCGAGAG   | CGGGAGACTAAGGAGCAGAG     |
| <i>TOP2A</i>    | CGCACGAGAAAACAAGTGAG   | TCCGTCCAGAAGAACCAATC     |
| <i>TUB4A4</i>   | ATGGAGGGATGAATGGTTATGC | CTTTTTGGGTCTGGCTTCTTTTAC |
| <i>UHFR1</i>    | AGAGTTCAGGGGGTCTGTACC  | ACTCGGCATTTGGGAGTTG      |
| <i>UPF3B</i>    | AGATGGCGGAATTGCTAATG   | ATGCCCTTGTGATAAGTCG      |
